# Supplementary material for: Proteomics of Streptococcus gordonii within a model developing oral microbial community
Source: PubMed Central journal article supplement (PMC3534352; doi:10.1186/1471-2180-12-211), 2012-09-18
Supplement: 1471-2180-12-211-S1.pdf [file 1471-2180-12-211-S1.pdf]

Summary Table SgFn vs Sg SgPg vs Sg SgPgFn vs Sg SgPg v SgFn SgPgFn v SgFn SgPgFn vs SgPg Coverage

| Protein                                                            | SgFn vs Sg |       |        |        | SgPg vs Sg |       |        |        | SgPgFn vs Sg |       |        |        | SgPg v SgFn |       |        |        | SgPgFn v SgFn |       |        |        | SgPgFn vs SgPg |       |        |        | Log <sub>2</sub> Ratios |     |       |       |    |    |    |   |   |   |   |  |
|--------------------------------------------------------------------|------------|-------|--------|--------|------------|-------|--------|--------|--------------|-------|--------|--------|-------------|-------|--------|--------|---------------|-------|--------|--------|----------------|-------|--------|--------|-------------------------|-----|-------|-------|----|----|----|---|---|---|---|--|
|                                                                    | Ratio      | Sum   | q-Val  | p-Val  | Ratio      | Sum   | q-Val  | p-Val  | Ratio        | Sum   | q-Val  | p-Val  | Ratio       | Sum   | q-Val  | p-Val  | Ratio         | Sum   | q-Val  | p-Val  | Ratio          | Sum   | q-Val  | p-Val  | Ratio                   | Sum | q-Val | p-Val | -6 | -4 | -2 | 0 | 2 | 4 | 6 |  |
| SGO_0001                                                           | -0.902     | 7.046 | 0.0101 | 0.0398 | -0.754     | 7.101 | 0.0159 | 0.0586 | -1.455       | 6.882 | 0.0038 | 0.0189 | 0.148       | 6.069 | 0.0468 | 0.3152 | -0.553        | 5.134 | 0.0078 | 0.0292 | -0.702         | 5.838 | 0.0183 | 0.0240 |                         |     |       |       |    |    |    |   |   |   |   |  |
| dnaA; chromosomal replication initiator protein DnaA               |            |       |        |        |            |       |        |        |              |       |        |        |             |       |        |        |               |       |        |        |                |       |        |        |                         |     |       |       |    |    |    |   |   |   |   |  |
| SGO_0002                                                           | 0.640      | 7.258 | 0.0146 | 0.0633 | 0.550      | 7.204 | 0.0242 | 0.0969 | -0.140       | 6.846 | 0.0591 | 0.5301 | -0.090      | 6.961 | 0.0299 | 0.1843 | -0.780        | 6.060 | 0.0016 | 0.0035 | -0.691         | 6.614 | 0.0067 | 0.0043 |                         |     |       |       |    |    |    |   |   |   |   |  |
| dnaN; DNA polymerase III, beta subunit                             |            |       |        |        |            |       |        |        |              |       |        |        |             |       |        |        |               |       |        |        |                |       |        |        |                         |     |       |       |    |    |    |   |   |   |   |  |
| SGO_0004                                                           | -1.661     | 8.780 | 0.0020 | 0.0050 | -1.979     | 8.713 | 0.0019 | 0.0040 | -2.017       | 8.695 | 0.0009 | 0.0028 | -0.318      | 7.080 | 0.0514 | 0.3501 | -0.356        | 6.431 | 0.0274 | 0.1457 | -0.038         | 6.879 | 0.2009 | 0.7232 |                         |     |       |       |    |    |    |   |   |   |   |  |
| putative lipoprotein                                               |            |       |        |        |            |       |        |        |              |       |        |        |             |       |        |        |               |       |        |        |                |       |        |        |                         |     |       |       |    |    |    |   |   |   |   |  |
| SGO_0005                                                           |            | 4.640 |        |        |            | 4.640 |        |        |              | 4.640 |        |        |             |       |        |        |               |       |        |        |                |       |        |        |                         |     |       |       |    |    |    |   |   |   |   |  |
| hypothetical protein SGO_0005                                      |            |       |        |        |            |       |        |        |              |       |        |        |             |       |        |        |               |       |        |        |                |       |        |        |                         |     |       |       |    |    |    |   |   |   |   |  |
| SGO_0006                                                           | 0.158      | 7.655 | 0.0485 | 0.2750 | 0.462      | 7.817 | 0.0017 | 0.0033 | 0.100        | 7.626 | 0.0516 | 0.4541 | 0.304       | 7.378 | 0.0161 | 0.0882 | -0.058        | 6.587 | 0.1084 | 0.7696 | -0.362         | 7.354 | 0.0348 | 0.0653 |                         |     |       |       |    |    |    |   |   |   |   |  |
| ABC transporter, ATP-binding protein                               |            |       |        |        |            |       |        |        |              |       |        |        |             |       |        |        |               |       |        |        |                |       |        |        |                         |     |       |       |    |    |    |   |   |   |   |  |
| SGO_0007                                                           | -0.294     | 6.164 | 0.0417 | 0.2311 | 1.153      | 6.977 | 0.0003 | 0.0002 | 0.785        | 6.734 | 0.0005 | 0.0012 | 1.447       | 6.385 | 0.0006 | 0.0008 | 1.079         | 5.516 | 0.0015 | 0.0031 | -0.368         | 6.754 | 0.0012 | 0.0001 |                         |     |       |       |    |    |    |   |   |   |   |  |
| trpS; tryptophanyl-tRNA synthetase                                 |            |       |        |        |            |       |        |        |              |       |        |        |             |       |        |        |               |       |        |        |                |       |        |        |                         |     |       |       |    |    |    |   |   |   |   |  |
| SGO_0008                                                           | 0.310      | 9.371 | 0.0149 | 0.0651 | 1.064      | 9.833 | 0.0005 | 0.0007 | 0.961        | 9.763 | 0.0004 | 0.0008 | 0.755       | 9.426 | 0.0009 | 0.0014 | 0.651         | 8.752 | 0.0013 | 0.0020 | -0.103         | 9.703 | 0.0397 | 0.0811 |                         |     |       |       |    |    |    |   |   |   |   |  |
| inosine-5'-monophosphate dehydrogenase                             |            |       |        |        |            |       |        |        |              |       |        |        |             |       |        |        |               |       |        |        |                |       |        |        |                         |     |       |       |    |    |    |   |   |   |   |  |
| SGO_0011                                                           | -0.863     | 5.257 | 0.0270 | 0.1369 | -1.064     | 5.482 | 0.0036 | 0.0090 | -0.825       | 5.581 | 0.0082 | 0.0486 | -0.201      | 4.002 | 0.0922 | 0.6812 | 0.038         | 3.580 | 0.1191 | 0.8484 | 0.238          | 4.509 | 0.1464 | 0.4687 |                         |     |       |       |    |    |    |   |   |   |   |  |
| proteinase, M16 family                                             |            |       |        |        |            |       |        |        |              |       |        |        |             |       |        |        |               |       |        |        |                |       |        |        |                         |     |       |       |    |    |    |   |   |   |   |  |
| SGO_0012                                                           | 1.455      | 4.510 | 0.0205 | 0.0948 |            | 1.807 |        |        |              | 1.807 |        |        |             | 3.756 |        |        |               | 3.145 |        |        |                |       |        |        |                         |     |       |       |    |    |    |   |   |   |   |  |
| mpp; peptidase, M16 family                                         |            |       |        |        |            |       |        |        |              |       |        |        |             |       |        |        |               |       |        |        |                |       |        |        |                         |     |       |       |    |    |    |   |   |   |   |  |
| SGO_0013                                                           |            | 4.813 |        |        | -0.643     | 5.212 | 0.0434 | 0.1881 |              | 4.813 |        |        |             | 2.648 |        |        |               |       |        |        |                | 2.648 |        |        |                         |     |       |       |    |    |    |   |   |   |   |  |
| hypothetical protein SGO_0013                                      |            |       |        |        |            |       |        |        |              |       |        |        |             |       |        |        |               |       |        |        |                |       |        |        |                         |     |       |       |    |    |    |   |   |   |   |  |
| SGO_0015                                                           | -2.771     | 6.426 | 0.0058 | 0.0196 | -2.256     | 6.598 | 0.0001 | 0.0000 | -2.738       | 6.428 | 0.0039 | 0.0197 | 0.514       | 3.987 | 0.0097 | 0.0458 | 0.033         | 2.445 |        |        | -0.482         | 3.996 | 0.0283 | 0.0484 |                         |     |       |       |    |    |    |   |   |   |   |  |
| ABC transporter (ATP-binding protein)                              |            |       |        |        |            |       |        |        |              |       |        |        |             |       |        |        |               |       |        |        |                |       |        |        |                         |     |       |       |    |    |    |   |   |   |   |  |
| SGO_0016                                                           |            | 3.787 |        |        | -0.241     | 4.669 | 0.0423 | 0.1825 |              | 3.787 |        |        |             | 3.028 |        |        |               |       |        |        |                | 3.028 |        |        |                         |     |       |       |    |    |    |   |   |   |   |  |
| cbiO; ABC transporter, ATP-binding protein                         |            |       |        |        |            |       |        |        |              |       |        |        |             |       |        |        |               |       |        |        |                |       |        |        |                         |     |       |       |    |    |    |   |   |   |   |  |
| SGO_0017                                                           |            | 2.351 |        |        |            | 2.351 |        |        |              | 2.351 |        |        |             |       |        |        |               |       |        |        |                |       |        |        |                         |     |       |       |    |    |    |   |   |   |   |  |
| ABC-type putative cobalt transport system, permease                |            |       |        |        |            |       |        |        |              |       |        |        |             |       |        |        |               |       |        |        |                |       |        |        |                         |     |       |       |    |    |    |   |   |   |   |  |
| SGO_0019                                                           |            | 2.807 |        |        |            | 2.807 |        |        |              | 2.807 |        |        |             |       |        |        |               |       |        |        |                |       |        |        |                         |     |       |       |    |    |    |   |   |   |   |  |
| sdhA; L-serine dehydratase, iron-sulfur-dependent, alpha subunit   |            |       |        |        |            |       |        |        |              |       |        |        |             |       |        |        |               |       |        |        |                |       |        |        |                         |     |       |       |    |    |    |   |   |   |   |  |
| SGO_0020                                                           | -0.115     | 4.222 | 0.1386 | 0.9320 |            | 2.585 |        |        |              | 2.585 |        |        |             | 3.149 |        |        |               | 2.538 |        |        |                |       |        |        |                         |     |       |       |    |    |    |   |   |   |   |  |
| sdhB; L-serine dehydratase, iron-sulfur-dependent, beta subunit    |            |       |        |        |            |       |        |        |              |       |        |        |             |       |        |        |               |       |        |        |                |       |        |        |                         |     |       |       |    |    |    |   |   |   |   |  |
| SGO_0022                                                           | 3.662      | 7.860 | 0.0001 | 0.0000 | 1.241      | 5.854 | 0.0025 | 0.0057 | 0.104        | 5.176 | 0.0906 | 0.8591 | -2.421      | 7.479 | 0.0000 | 0.0000 | -3.558        | 6.740 | 0.0001 | 0.0000 | -1.137         | 5.357 | 0.0037 | 0.0010 |                         |     |       |       |    |    |    |   |   |   |   |  |
| trmU; tRNA (5-methylaminomethyl-2-thiouridylate)-methyltransferase |            |       |        |        |            |       |        |        |              |       |        |        |             |       |        |        |               |       |        |        |                |       |        |        |                         |     |       |       |    |    |    |   |   |   |   |  |

Show detected proteins only  
 Show all proteins

Filter by category:

Proteins found:  
1179

Dot Plots  
Dot Plots

Test Cutoff

q-Value p-Value

.005

| Signif | Direction | Applies To   |
|--------|-----------|--------------|
| yes    | +         | ratios, bars |
| no     | n/a       | bars         |
| yes    | -         | ratios, bars |
| yes    | +         | p-, q-Values |
| yes    | -         | p-, q-Values |

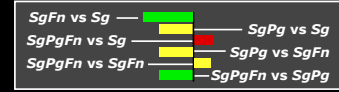

Summary Table SgFn vs Sg SgPg vs Sg SgPgFn vs Sg SgPg v SgFn SgPgFn v SgFn SgPgFn vs SgPg Coverage

| Protein                                                          | SgFn vs Sg |       |        |        | SgPg vs Sg |       |        |        | SgPgFn vs Sg |       |        |        | SgPg v SgFn |       |        |        | SgPgFn v SgFn |       |        |        | SgPgFn vs SgPg |       |        |        | Log <sub>2</sub> Ratios |     |       |       |    |    |    |   |   |   |   |  |
|------------------------------------------------------------------|------------|-------|--------|--------|------------|-------|--------|--------|--------------|-------|--------|--------|-------------|-------|--------|--------|---------------|-------|--------|--------|----------------|-------|--------|--------|-------------------------|-----|-------|-------|----|----|----|---|---|---|---|--|
|                                                                  | Ratio      | Sum   | q-Val  | p-Val  | Ratio      | Sum   | q-Val  | p-Val  | Ratio        | Sum   | q-Val  | p-Val  | Ratio       | Sum   | q-Val  | p-Val  | Ratio         | Sum   | q-Val  | p-Val  | Ratio          | Sum   | q-Val  | p-Val  | Ratio                   | Sum | q-Val | p-Val | -6 | -4 | -2 | 0 | 2 | 4 | 6 |  |
| SGO_0025<br>gidA; glucose inhibited division protein A           | -0.570     | 5.781 | 0.0268 | 0.1355 | 0.338      | 6.207 | 0.0477 | 0.2100 | 0.343        | 6.230 | 0.0332 | 0.2749 | 0.908       | 5.502 | 0.0157 | 0.0846 | 0.913         | 4.918 | 0.0230 | 0.1173 | 0.005          | 5.892 | 0.2382 | 0.9134 |                         |     |       |       |    |    |    |   |   |   |   |  |
| SGO_0026<br>DHH subfamily 1 protein                              |            | 7.420 |        |        | -3.976     | 7.514 | 0.0005 | 0.0007 | -4.015       | 7.463 | 0.0109 | 0.0718 |             | 3.020 |        |        |               | 1.272 |        |        | -0.039         | 3.561 | 0.2247 | 0.8413 |                         |     |       |       |    |    |    |   |   |   |   |  |
| SGO_0027<br>rplI; ribosomal protein L9                           | -0.380     | 6.937 | 0.0100 | 0.0393 | 0.376      | 7.312 | 0.0046 | 0.0126 | 0.520        | 7.410 | 0.0109 | 0.0722 | 0.756       | 6.646 | 0.0011 | 0.0021 | 0.900         | 6.144 | 0.0071 | 0.0259 | 0.144          | 7.060 | 0.1271 | 0.3931 |                         |     |       |       |    |    |    |   |   |   |   |  |
| SGO_0028<br>dnaC; replicative DNA helicase                       | -1.442     | 5.255 | 0.0034 | 0.0101 | -0.451     | 5.614 | 0.0507 | 0.2268 | -0.610       | 5.208 | 0.0357 | 0.2993 | 0.991       | 4.452 | 0.0119 | 0.0590 | 0.832         | 3.141 | 0.0235 | 0.1219 | -0.159         | 4.394 | 0.1982 | 0.7084 |                         |     |       |       |    |    |    |   |   |   |   |  |
| SGO_0030<br>aspB; aspartate transaminase                         | 2.151      | 7.906 | 0.0001 | 0.0000 | 0.967      | 7.027 | 0.0008 | 0.0011 | 0.689        | 6.851 | 0.0018 | 0.0069 | -1.184      | 7.625 | 0.0001 | 0.0000 | -1.462        | 6.935 | 0.0001 | 0.0000 | -0.278         | 6.784 | 0.0184 | 0.0244 |                         |     |       |       |    |    |    |   |   |   |   |  |
| SGO_0032<br>plsX; fatty acid/phospholipid synthesis protein PlsX | -0.944     | 7.088 | 0.0028 | 0.0077 | 0.024      | 7.492 | 0.1697 | 0.8926 | -0.245       | 7.365 | 0.0180 | 0.1364 | 0.968       | 6.584 | 0.0006 | 0.0007 | 0.699         | 5.805 | 0.0031 | 0.0086 | -0.269         | 6.860 | 0.0188 | 0.0254 |                         |     |       |       |    |    |    |   |   |   |   |  |
| SGO_0033<br>acpP; acyl carrier protein                           |            | 3.725 |        |        | 0.994      | 5.306 | 0.0039 | 0.0102 | 1.403        | 5.651 | 0.0085 | 0.0517 |             | 4.205 |        |        |               | 4.086 |        |        | 0.409          | 5.472 | 0.0935 | 0.2631 |                         |     |       |       |    |    |    |   |   |   |   |  |
| SGO_0035<br>phosphoribosylformylglycinamide synthase             | 2.367      | 5.314 | 0.0174 | 0.0779 | -0.709     | 2.496 |        |        |              | 1.807 |        |        | -3.076      | 4.751 | 0.0137 | 0.0713 |               | 4.058 |        |        |                | 0.585 |        |        |                         |     |       |       |    |    |    |   |   |   |   |  |
| SGO_0042<br>transcription regulator, GntR family                 | 0.918      | 6.144 | 0.0003 | 0.0002 | 0.355      | 5.804 | 0.0083 | 0.0260 | 0.243        | 5.283 | 0.0113 | 0.0752 | -0.563      | 5.766 | 0.0019 | 0.0045 | -0.675        | 4.801 | 0.0136 | 0.0616 | -0.112         | 5.007 | 0.1627 | 0.5485 |                         |     |       |       |    |    |    |   |   |   |   |  |
| SGO_0044<br>PTS system, IIB component                            |            |       |        |        |            |       |        |        |              |       |        |        |             |       |        |        |               |       |        |        |                |       |        |        |                         |     |       |       |    |    |    |   |   |   |   |  |
| SGO_0050<br>hypothetical protein SGO_0050                        |            | 4.640 |        |        |            | 4.640 |        |        |              | 4.640 |        |        |             |       |        |        |               |       |        |        |                |       |        |        |                         |     |       |       |    |    |    |   |   |   |   |  |
| SGO_0051<br>hypothetical protein SGO_0051                        |            | 3.351 |        |        |            | 3.351 |        |        |              | 3.351 |        |        |             |       |        |        |               |       |        |        |                |       |        |        |                         |     |       |       |    |    |    |   |   |   |   |  |
| SGO_0054<br>dltA; D-alanine-activating enzyme                    | 1.565      | 8.469 | 0.0001 | 0.0001 | 0.238      | 7.609 | 0.0136 | 0.0480 | -0.677       | 7.186 | 0.0010 | 0.0031 | -1.327      | 8.019 | 0.0002 | 0.0001 | -2.242        | 7.201 | 0.0001 | 0.0000 | -0.915         | 6.823 | 0.0031 | 0.0007 |                         |     |       |       |    |    |    |   |   |   |   |  |
| SGO_0055<br>dltB; integral membrane protein                      |            | 2.058 |        |        |            | 2.058 |        |        |              | 2.058 |        |        |             |       |        |        |               |       |        |        |                |       |        |        |                         |     |       |       |    |    |    |   |   |   |   |  |
| SGO_0056<br>dltC; D-alanyl carrier protein                       | -0.711     | 3.805 | 0.0112 | 0.0452 |            | 3.420 |        |        |              | 3.420 |        |        |             | 1.196 |        |        |               | 0.585 |        |        |                |       |        |        |                         |     |       |       |    |    |    |   |   |   |   |  |
| SGO_0057<br>dltD protein                                         | -1.818     | 8.223 | 0.0010 | 0.0018 | -2.098     | 8.163 | 0.0008 | 0.0012 | -2.415       | 8.108 | 0.0005 | 0.0010 | -0.280      | 6.397 | 0.0215 | 0.1239 | -0.596        | 5.653 | 0.0078 | 0.0291 | -0.316         | 6.092 | 0.0050 | 0.0020 |                         |     |       |       |    |    |    |   |   |   |   |  |

Show detected proteins only  
 Show all proteins

Filter by category:

Proteins found:  
1179

Dot Plots  
Dot Plots

Test Cutoff

q-Value p-Value

.005

| Signif | Direction | Applies To   |
|--------|-----------|--------------|
| yes    | +         | ratios, bars |
| no     | n/a       | bars         |
| yes    | -         | ratios, bars |
| yes    | +         | p-, q-Values |
| yes    | -         | p-, q-Values |



Summary Table SgFn vs Sg SgPg vs Sg SgPgFn vs Sg SgPg v SgFn SgPgFn v SgFn SgPgFn vs SgPg Coverage

| Protein                                      | SgFn vs Sg |        |        |        | SgPg vs Sg |        |        |        | SgPgFn vs Sg |        |        |        | SgPg v SgFn |        |        |        | SgPgFn v SgFn |        |        |        | SgPgFn vs SgPg |        |        |        | Log <sub>2</sub> Ratios |     |       |       |    |    |    |   |   |   |   |  |
|----------------------------------------------|------------|--------|--------|--------|------------|--------|--------|--------|--------------|--------|--------|--------|-------------|--------|--------|--------|---------------|--------|--------|--------|----------------|--------|--------|--------|-------------------------|-----|-------|-------|----|----|----|---|---|---|---|--|
|                                              | Ratio      | Sum    | q-Val  | p-Val  | Ratio      | Sum    | q-Val  | p-Val  | Ratio        | Sum    | q-Val  | p-Val  | Ratio       | Sum    | q-Val  | p-Val  | Ratio         | Sum    | q-Val  | p-Val  | Ratio          | Sum    | q-Val  | p-Val  | Ratio                   | Sum | q-Val | p-Val | -6 | -4 | -2 | 0 | 2 | 4 | 6 |  |
| SGO_0059                                     | -2.492     | 11.167 | 0.0067 | 0.0235 | 1.097      | 12.538 | 0.0073 | 0.0222 | 1.992        | 13.189 | 0.0006 | 0.0015 | 3.589       | 11.564 | 0.0007 | 0.0009 | 4.484         | 11.789 | 0.0004 | 0.0002 | 0.895          | 12.958 | 0.0058 | 0.0034 |                         |     |       |       |    |    |    |   |   |   |   |  |
| pXO1; hypothetical protein SGO_0059          |            |        |        |        |            |        |        |        |              |        |        |        |             |        |        |        |               |        |        |        |                |        |        |        |                         |     |       |       |    |    |    |   |   |   |   |  |
| SGO_0060                                     | -4.809     | 8.069  | 0.0112 | 0.0455 |            | 8.043  |        |        |              | 8.043  |        |        |             | 1.717  |        |        |               | 1.107  |        |        |                |        |        |        |                         |     |       |       |    |    |    |   |   |   |   |  |
| hypothetical protein SGO_0060                |            |        |        |        |            |        |        |        |              |        |        |        |             |        |        |        |               |        |        |        |                |        |        |        |                         |     |       |       |    |    |    |   |   |   |   |  |
| SGO_0062                                     |            | 1.379  |        |        |            | 1.380  |        |        |              | 1.380  |        |        |             |        |        |        |               |        |        |        |                |        |        |        |                         |     |       |       |    |    |    |   |   |   |   |  |
| hypothetical protein SGO_0062                |            |        |        |        |            |        |        |        |              |        |        |        |             |        |        |        |               |        |        |        |                |        |        |        |                         |     |       |       |    |    |    |   |   |   |   |  |
| SGO_0063                                     | -1.969     | 7.830  | 0.0001 | 0.0000 | -1.765     | 7.875  | 0.0002 | 0.0001 | -1.618       | 7.907  | 0.0000 | 0.0000 | 0.204       | 6.135  | 0.0400 | 0.2615 | 0.350         | 5.597  | 0.0071 | 0.0258 | 0.146          | 6.304  | 0.1104 | 0.3266 |                         |     |       |       |    |    |    |   |   |   |   |  |
| hypothetical protein SGO_0063                |            |        |        |        |            |        |        |        |              |        |        |        |             |        |        |        |               |        |        |        |                |        |        |        |                         |     |       |       |    |    |    |   |   |   |   |  |
| SGO_0064                                     | -2.780     | 8.948  | 0.0001 | 0.0000 | -1.647     | 9.154  | 0.0003 | 0.0002 | -2.484       | 8.988  | 0.0001 | 0.0000 | 1.133       | 7.144  | 0.0027 | 0.0079 | 0.296         | 6.006  | 0.0101 | 0.0407 | -0.837         | 7.241  | 0.0120 | 0.0121 |                         |     |       |       |    |    |    |   |   |   |   |  |
| FtsK/SpoIIIE family protein                  |            |        |        |        |            |        |        |        |              |        |        |        |             |        |        |        |               |        |        |        |                |        |        |        |                         |     |       |       |    |    |    |   |   |   |   |  |
| SGO_0065                                     | 0.041      | 7.328  | 0.0927 | 0.5936 | 0.339      | 7.484  | 0.0009 | 0.0013 | 0.159        | 7.386  | 0.0007 | 0.0020 | 0.298       | 6.991  | 0.0071 | 0.0294 | 0.118         | 6.285  | 0.0397 | 0.2305 | -0.179         | 7.043  | 0.0094 | 0.0077 |                         |     |       |       |    |    |    |   |   |   |   |  |
| hypothetical protein SGO_0065                |            |        |        |        |            |        |        |        |              |        |        |        |             |        |        |        |               |        |        |        |                |        |        |        |                         |     |       |       |    |    |    |   |   |   |   |  |
| SGO_0066                                     |            | 2.446  |        |        |            | 4.494  |        |        |              | 4.900  |        |        | 1.034       | 4.293  | 0.0278 | 0.1684 | 1.422         | 4.018  | 0.0352 | 0.2001 | 0.388          | 5.198  | 0.0661 | 0.1647 |                         |     |       |       |    |    |    |   |   |   |   |  |
| D-3-phosphoglycerate dehydrogenase, putative |            |        |        |        |            |        |        |        |              |        |        |        |             |        |        |        |               |        |        |        |                |        |        |        |                         |     |       |       |    |    |    |   |   |   |   |  |
| SGO_0067                                     | -1.326     | 6.056  | 0.0003 | 0.0004 | 0.784      | 7.024  | 0.0059 | 0.0173 | -0.170       | 6.487  | 0.0082 | 0.0489 | 2.110       | 6.156  | 0.0015 | 0.0035 | 1.156         | 4.815  | 0.0012 | 0.0019 | -0.954         | 6.452  | 0.0122 | 0.0126 |                         |     |       |       |    |    |    |   |   |   |   |  |
| protein with prophage function domain        |            |        |        |        |            |        |        |        |              |        |        |        |             |        |        |        |               |        |        |        |                |        |        |        |                         |     |       |       |    |    |    |   |   |   |   |  |
| SGO_0068                                     | -1.848     | 6.075  | 0.0116 | 0.0478 | -0.510     | 6.655  | 0.0016 | 0.0031 | -0.815       | 6.537  | 0.0004 | 0.0009 | 1.338       | 5.123  | 0.0075 | 0.0324 | 1.033         | 4.262  | 0.0063 | 0.0223 | -0.305         | 5.719  | 0.0051 | 0.0023 |                         |     |       |       |    |    |    |   |   |   |   |  |
| lipoprotein, putative                        |            |        |        |        |            |        |        |        |              |        |        |        |             |        |        |        |               |        |        |        |                |        |        |        |                         |     |       |       |    |    |    |   |   |   |   |  |
| SGO_0069                                     |            | 5.402  |        |        | -0.728     | 6.084  | 0.0007 | 0.0009 | -1.033       | 5.980  | 0.0006 | 0.0015 |             | 4.162  |        |        |               | 3.258  |        |        | -0.305         | 5.023  | 0.0396 | 0.0796 |                         |     |       |       |    |    |    |   |   |   |   |  |
| hypothetical protein SGO_0069                |            |        |        |        |            |        |        |        |              |        |        |        |             |        |        |        |               |        |        |        |                |        |        |        |                         |     |       |       |    |    |    |   |   |   |   |  |
| SGO_0070                                     |            | 5.452  |        |        | 0.264      | 6.588  | 0.0177 | 0.0667 | 0.351        | 6.637  | 0.0080 | 0.0470 |             | 5.199  |        |        |               | 4.678  |        |        | 0.087          | 6.244  | 0.1261 | 0.3884 |                         |     |       |       |    |    |    |   |   |   |   |  |
| merozoite surface protein 1                  |            |        |        |        |            |        |        |        |              |        |        |        |             |        |        |        |               |        |        |        |                |        |        |        |                         |     |       |       |    |    |    |   |   |   |   |  |
| SGO_0075                                     |            | 1.379  |        |        |            | 1.380  |        |        |              | 1.380  |        |        |             |        |        |        |               |        |        |        |                |        |        |        |                         |     |       |       |    |    |    |   |   |   |   |  |
| hypothetical protein SGO_0075                |            |        |        |        |            |        |        |        |              |        |        |        |             |        |        |        |               |        |        |        |                |        |        |        |                         |     |       |       |    |    |    |   |   |   |   |  |
| SGO_0078                                     | -2.233     | 5.972  | 0.0356 | 0.1899 | -1.267     | 6.328  | 0.0090 | 0.0292 |              | 5.830  |        |        | 0.966       | 4.360  | 0.0387 | 0.2518 |               | 1.429  |        |        |                | 4.038  |        |        |                         |     |       |       |    |    |    |   |   |   |   |  |
| hypothetical protein SGO_0078                |            |        |        |        |            |        |        |        |              |        |        |        |             |        |        |        |               |        |        |        |                |        |        |        |                         |     |       |       |    |    |    |   |   |   |   |  |
| SGO_0079                                     |            | 1.379  |        |        |            | 1.380  |        |        |              | 1.380  |        |        |             |        |        |        |               |        |        |        |                |        |        |        |                         |     |       |       |    |    |    |   |   |   |   |  |
| hypothetical protein SGO_0079                |            |        |        |        |            |        |        |        |              |        |        |        |             |        |        |        |               |        |        |        |                |        |        |        |                         |     |       |       |    |    |    |   |   |   |   |  |
| SGO_0080                                     | -1.239     | 7.315  | 0.0013 | 0.0026 | -0.712     | 7.484  | 0.0011 | 0.0018 | -0.691       | 7.490  | 0.0004 | 0.0007 | 0.527       | 6.346  | 0.0125 | 0.0629 | 0.548         | 5.745  | 0.0105 | 0.0445 | 0.021          | 6.581  | 0.2181 | 0.8060 |                         |     |       |       |    |    |    |   |   |   |   |  |
| hypothetical protein SGO_0080                |            |        |        |        |            |        |        |        |              |        |        |        |             |        |        |        |               |        |        |        |                |        |        |        |                         |     |       |       |    |    |    |   |   |   |   |  |
| SGO_0081                                     | 1.176      | 4.906  | 0.0041 | 0.0126 | 1.034      | 4.842  | 0.0181 | 0.0685 |              | 3.266  |        |        | -0.142      | 4.788  | 0.0913 | 0.6734 |               | 3.224  |        |        |                | 3.740  |        |        |                         |     |       |       |    |    |    |   |   |   |   |  |
| hypothetical protein SGO_0081                |            |        |        |        |            |        |        |        |              |        |        |        |             |        |        |        |               |        |        |        |                |        |        |        |                         |     |       |       |    |    |    |   |   |   |   |  |

Show detected proteins only  
 Show all proteins  
 Filter by category:

Proteins found: 1179

Dot Plots  
Dot Plots

Test Cutoff

q-Value p-Value

.005

| Signif | Direction | Applies To   |
|--------|-----------|--------------|
| yes    | +         | ratios, bars |
| no     | n/a       | bars         |
| yes    | -         | ratios, bars |
| yes    | +         | p-, q-Values |
| yes    | -         | p-, q-Values |

SgFn vs Sg — █ — SgPg vs Sg  
 SgPgFn vs Sg — █ — SgPg vs SgFn  
 SgPgFn vs SgFn — █ — SgPgFn vs SgPg

Summary Table SgFn vs Sg SgPg vs Sg SgPgFn vs Sg SgPg v SgFn SgPgFn v SgFn SgPgFn vs SgPg Coverage

| Protein                                                  | SgFn vs Sg |        |        |        | SgPg vs Sg |        |        |        | SgPgFn vs Sg |        |        |        | SgPg v SgFn |        |        |        | SgPgFn v SgFn |        |        |        | SgPgFn vs SgPg |        |        |        | Log <sub>2</sub> Ratios |     |       |       |    |    |    |   |   |   |   |  |  |  |
|----------------------------------------------------------|------------|--------|--------|--------|------------|--------|--------|--------|--------------|--------|--------|--------|-------------|--------|--------|--------|---------------|--------|--------|--------|----------------|--------|--------|--------|-------------------------|-----|-------|-------|----|----|----|---|---|---|---|--|--|--|
|                                                          | Ratio      | Sum    | q-Val  | p-Val  | Ratio      | Sum    | q-Val  | p-Val  | Ratio        | Sum    | q-Val  | p-Val  | Ratio       | Sum    | q-Val  | p-Val  | Ratio         | Sum    | q-Val  | p-Val  | Ratio          | Sum    | q-Val  | p-Val  | Ratio                   | Sum | q-Val | p-Val | -6 | -4 | -2 | 0 | 2 | 4 | 6 |  |  |  |
| SGO_0095                                                 |            | 6.401  |        |        |            | 5.271  |        |        |              |        |        |        | -1.125      | 6.431  | 0.0009 | 0.0016 |               | 5.277  |        |        |                | 4.758  |        |        |                         |     |       |       |    |    |    |   |   |   |   |  |  |  |
| mccF; microcin immunity protein MccF, putative           |            |        |        |        |            |        |        |        |              |        |        |        |             |        |        |        |               |        |        |        |                |        |        |        |                         |     |       |       |    |    |    |   |   |   |   |  |  |  |
| SGO_0097                                                 |            | 6.097  |        |        |            | 6.097  |        |        |              | 6.097  |        |        |             |        |        |        |               |        |        |        |                |        |        |        |                         |     |       |       |    |    |    |   |   |   |   |  |  |  |
| hypothetical protein SGO_0097                            |            |        |        |        |            |        |        |        |              |        |        |        |             |        |        |        |               |        |        |        |                |        |        |        |                         |     |       |       |    |    |    |   |   |   |   |  |  |  |
| SGO_0098                                                 |            | 4.012  |        |        | 0.979      | 6.324  | 0.0344 | 0.1448 |              | 4.012  |        |        |             | 5.487  |        |        |               |        |        |        |                | 5.487  |        |        |                         |     |       |       |    |    |    |   |   |   |   |  |  |  |
| ribonucleotide reductase-like protein                    |            |        |        |        |            |        |        |        |              |        |        |        |             |        |        |        |               |        |        |        |                |        |        |        |                         |     |       |       |    |    |    |   |   |   |   |  |  |  |
| SGO_0099                                                 |            | 4.372  |        |        |            | 3.712  |        |        |              | 2.396  |        |        | -0.483      | 4.566  | 0.0416 | 0.2746 | -0.792        | 3.575  | 0.0732 | 0.4882 | -0.310         | 3.686  | 0.0956 | 0.2721 |                         |     |       |       |    |    |    |   |   |   |   |  |  |  |
| pulA-2; pullulanase, type I                              |            |        |        |        |            |        |        |        |              |        |        |        |             |        |        |        |               |        |        |        |                |        |        |        |                         |     |       |       |    |    |    |   |   |   |   |  |  |  |
| SGO_0100                                                 | 0.845      | 4.371  | 0.0570 | 0.3329 | 0.127      | 4.089  | 0.1827 | 0.9834 |              | 3.499  |        |        | -0.717      | 3.403  |        |        |               | 2.107  |        |        |                | 2.000  |        |        |                         |     |       |       |    |    |    |   |   |   |   |  |  |  |
| maltose operon transcription repressor                   |            |        |        |        |            |        |        |        |              |        |        |        |             |        |        |        |               |        |        |        |                |        |        |        |                         |     |       |       |    |    |    |   |   |   |   |  |  |  |
| SGO_0101                                                 |            | 4.874  |        |        |            | 4.874  |        |        |              | 4.874  |        |        |             |        |        |        |               |        |        |        |                |        |        |        |                         |     |       |       |    |    |    |   |   |   |   |  |  |  |
| malA; Maltodextrose utilization protein malA             |            |        |        |        |            |        |        |        |              |        |        |        |             |        |        |        |               |        |        |        |                |        |        |        |                         |     |       |       |    |    |    |   |   |   |   |  |  |  |
| SGO_0104                                                 | -0.242     | 9.829  | 0.0207 | 0.0962 | -0.689     | 9.636  | 0.0001 | 0.0000 | -0.524       | 9.703  | 0.0008 | 0.0024 | -0.447      | 8.985  | 0.0077 | 0.0334 | -0.282        | 8.448  | 0.0219 | 0.1109 | 0.165          | 8.825  | 0.0450 | 0.0968 |                         |     |       |       |    |    |    |   |   |   |   |  |  |  |
| Maltose/maltodextrin-binding protein precursor           |            |        |        |        |            |        |        |        |              |        |        |        |             |        |        |        |               |        |        |        |                |        |        |        |                         |     |       |       |    |    |    |   |   |   |   |  |  |  |
| SGO_0105                                                 | 1.097      | 6.362  | 0.0042 | 0.0127 | 0.873      | 6.200  | 0.0011 | 0.0019 | -0.043       | 5.689  | 0.0920 | 0.8746 | -0.225      | 6.182  | 0.0330 | 0.2061 | -1.140        | 5.228  | 0.0045 | 0.0140 | -0.915         | 5.676  | 0.0067 | 0.0043 |                         |     |       |       |    |    |    |   |   |   |   |  |  |  |
| malQ; 4-alpha-glucanotransferase                         |            |        |        |        |            |        |        |        |              |        |        |        |             |        |        |        |               |        |        |        |                |        |        |        |                         |     |       |       |    |    |    |   |   |   |   |  |  |  |
| SGO_0106                                                 | 2.848      | 8.574  | 0.0005 | 0.0007 | 1.969      | 7.831  | 0.0002 | 0.0001 | 1.923        | 7.794  | 0.0001 | 0.0001 | -0.879      | 8.496  | 0.0019 | 0.0044 | -0.925        | 7.869  | 0.0018 | 0.0039 | -0.046         | 7.963  | 0.0238 | 0.0370 |                         |     |       |       |    |    |    |   |   |   |   |  |  |  |
| glgP-2; maltodextrin phosphorylase                       |            |        |        |        |            |        |        |        |              |        |        |        |             |        |        |        |               |        |        |        |                |        |        |        |                         |     |       |       |    |    |    |   |   |   |   |  |  |  |
| SGO_0107                                                 |            |        |        |        |            |        |        |        |              | 2.907  |        |        |             |        |        |        |               | 1.783  |        |        |                | 2.394  |        |        |                         |     |       |       |    |    |    |   |   |   |   |  |  |  |
| LPXTG cell wall surface protein, collagen binding domain |            |        |        |        |            |        |        |        |              |        |        |        |             |        |        |        |               |        |        |        |                |        |        |        |                         |     |       |       |    |    |    |   |   |   |   |  |  |  |
| SGO_0108                                                 | -1.035     | 6.092  | 0.0022 | 0.0058 |            | 5.505  |        |        |              | 5.505  |        |        |             | 3.998  |        |        |               | 3.387  |        |        |                |        |        |        |                         |     |       |       |    |    |    |   |   |   |   |  |  |  |
| ruvB; Holliday junction DNA helicase RuvB                |            |        |        |        |            |        |        |        |              |        |        |        |             |        |        |        |               |        |        |        |                |        |        |        |                         |     |       |       |    |    |    |   |   |   |   |  |  |  |
| SGO_0110                                                 |            | 2.231  |        |        |            | 2.898  |        |        |              |        |        |        | 0.668       | 3.090  |        |        |               | 1.107  |        |        |                | 2.385  |        |        |                         |     |       |       |    |    |    |   |   |   |   |  |  |  |
| phosphotyrosine protein phosphatase                      |            |        |        |        |            |        |        |        |              |        |        |        |             |        |        |        |               |        |        |        |                |        |        |        |                         |     |       |       |    |    |    |   |   |   |   |  |  |  |
| SGO_0111                                                 |            | 4.115  |        |        |            | 4.115  |        |        |              | 4.115  |        |        |             |        |        |        |               |        |        |        |                |        |        |        |                         |     |       |       |    |    |    |   |   |   |   |  |  |  |
| MORN motif family protein                                |            |        |        |        |            |        |        |        |              |        |        |        |             |        |        |        |               |        |        |        |                |        |        |        |                         |     |       |       |    |    |    |   |   |   |   |  |  |  |
| SGO_0112                                                 |            | 5.366  |        |        |            | 5.366  |        |        |              | 5.366  |        |        |             |        |        |        |               |        |        |        |                |        |        |        |                         |     |       |       |    |    |    |   |   |   |   |  |  |  |
| putative acyltransferase                                 |            |        |        |        |            |        |        |        |              |        |        |        |             |        |        |        |               |        |        |        |                |        |        |        |                         |     |       |       |    |    |    |   |   |   |   |  |  |  |
| SGO_0113                                                 | -2.089     | 13.012 | 0.0001 | 0.0000 | -1.505     | 13.143 | 0.0002 | 0.0001 | -1.648       | 13.107 | 0.0001 | 0.0001 | 0.584       | 11.427 | 0.0014 | 0.0031 | 0.441         | 10.731 | 0.0011 | 0.0015 | -0.143         | 11.620 | 0.0405 | 0.0836 |                         |     |       |       |    |    |    |   |   |   |   |  |  |  |
| acdH; alcohol-acetaldehyde dehydrogenase                 |            |        |        |        |            |        |        |        |              |        |        |        |             |        |        |        |               |        |        |        |                |        |        |        |                         |     |       |       |    |    |    |   |   |   |   |  |  |  |
| SGO_0128                                                 |            | 3.170  |        |        |            | 3.170  |        |        |              | 3.170  |        |        |             |        |        |        |               |        |        |        |                |        |        |        |                         |     |       |       |    |    |    |   |   |   |   |  |  |  |
| hypothetical protein SGO_0128                            |            |        |        |        |            |        |        |        |              |        |        |        |             |        |        |        |               |        |        |        |                |        |        |        |                         |     |       |       |    |    |    |   |   |   |   |  |  |  |

Show detected proteins only  
 Show all proteins

Filter by category:

Proteins found: 1179

Dot Plots  
 Dot Plots

Test Cutoff

| Signif | Direction | Applies To   |
|--------|-----------|--------------|
| yes    | +         | ratios, bars |
| no     | n/a       | bars         |
| yes    | -         | ratios, bars |
| yes    | +         | p-, q-Values |
| yes    | -         |              |

SgFn vs Sg — — SgPg vs Sg  
SgPgFn vs Sg — — SgPg vs SgFn  
SgPgFn vs SgFn — — SgPgFn vs SgPg

Summary Table SgFn vs Sg SgPg vs Sg SgPgFn vs Sg SgPg v SgFn SgPgFn v SgFn SgPgFn vs SgPg Coverage

| Protein                                   | SgFn vs Sg    |       |        |        | SgPg vs Sg    |       |        |        | SgPgFn vs Sg  |       |        |        | SgPg v SgFn   |       |        |        | SgPgFn v SgFn |       |        |        | SgPgFn vs SgPg |       |        |        | Log <sub>2</sub> Ratios |     |       |       |    |    |    |   |   |   |   |  |  |  |
|-------------------------------------------|---------------|-------|--------|--------|---------------|-------|--------|--------|---------------|-------|--------|--------|---------------|-------|--------|--------|---------------|-------|--------|--------|----------------|-------|--------|--------|-------------------------|-----|-------|-------|----|----|----|---|---|---|---|--|--|--|
|                                           | Ratio         | Sum   | q-Val  | p-Val  | Ratio         | Sum   | q-Val  | p-Val  | Ratio         | Sum   | q-Val  | p-Val  | Ratio         | Sum   | q-Val  | p-Val  | Ratio         | Sum   | q-Val  | p-Val  | Ratio          | Sum   | q-Val  | p-Val  | Ratio                   | Sum | q-Val | p-Val | -6 | -4 | -2 | 0 | 2 | 4 | 6 |  |  |  |
| SGO_0129                                  |               | 6.741 |        |        | <b>-3.290</b> | 6.881 | 0.0002 | 0.0001 |               | 6.741 |        |        |               | 2.937 |        |        |               |       |        |        |                | 2.937 |        |        |                         |     |       |       |    |    |    |   |   |   |   |  |  |  |
| atpI; v-type sodium ATP synthase, chain I |               |       |        |        |               |       |        |        |               |       |        |        |               |       |        |        |               |       |        |        |                |       |        |        |                         |     |       |       |    |    |    |   |   |   |   |  |  |  |
| SGO_0131                                  | -0.135        | 6.282 | 0.0858 | 0.5442 |               | 5.425 |        |        |               | 5.425 |        |        |               | 4.611 |        |        |               | 4.000 |        |        |                |       |        |        |                         |     |       |       |    |    |    |   |   |   |   |  |  |  |
| v-type sodium ATP synthase, chain E       |               |       |        |        |               |       |        |        |               |       |        |        |               |       |        |        |               |       |        |        |                |       |        |        |                         |     |       |       |    |    |    |   |   |   |   |  |  |  |
| SGO_0132                                  |               | 3.524 |        |        | -1.088        | 4.528 | 0.0494 | 0.2205 |               | 3.524 |        |        |               | 3.020 |        |        |               |       |        |        |                | 3.020 |        |        |                         |     |       |       |    |    |    |   |   |   |   |  |  |  |
| ATP synthase (C/AC39) subunit             |               |       |        |        |               |       |        |        |               |       |        |        |               |       |        |        |               |       |        |        |                |       |        |        |                         |     |       |       |    |    |    |   |   |   |   |  |  |  |
| SGO_0134                                  | -0.328        | 4.635 | 0.0580 | 0.3390 | 0.106         | 5.225 | 0.1182 | 0.5924 |               | 4.154 |        |        | 0.434         | 4.222 | 0.0641 | 0.4482 |               | 1.692 |        |        |                | 3.779 |        |        |                         |     |       |       |    |    |    |   |   |   |   |  |  |  |
| acetyltransferase, GNAT family            |               |       |        |        |               |       |        |        |               |       |        |        |               |       |        |        |               |       |        |        |                |       |        |        |                         |     |       |       |    |    |    |   |   |   |   |  |  |  |
| SGO_0135                                  | -0.017        | 8.321 | 0.1433 | 0.9713 | <b>-0.954</b> | 7.926 | 0.0003 | 0.0003 | <b>-1.286</b> | 7.825 | 0.0004 | 0.0008 | <b>-0.937</b> | 7.410 | 0.0031 | 0.0095 | <b>-1.269</b> | 6.698 | 0.0026 | 0.0068 | -0.332         | 6.712 | 0.0532 | 0.1238 |                         |     |       |       |    |    |    |   |   |   |   |  |  |  |
| v-type sodium ATP synthase, subunit A     |               |       |        |        |               |       |        |        |               |       |        |        |               |       |        |        |               |       |        |        |                |       |        |        |                         |     |       |       |    |    |    |   |   |   |   |  |  |  |
| SGO_0136                                  | <b>-0.696</b> | 8.587 | 0.0016 | 0.0037 | <b>-1.309</b> | 8.383 | 0.0007 | 0.0010 | <b>-1.600</b> | 8.309 | 0.0005 | 0.0011 | <b>-0.613</b> | 7.410 | 0.0019 | 0.0047 | <b>-0.904</b> | 6.696 | 0.0022 | 0.0052 | -0.291         | 6.942 | 0.0664 | 0.1660 |                         |     |       |       |    |    |    |   |   |   |   |  |  |  |
| v-type sodium ATP synthase, chain B       |               |       |        |        |               |       |        |        |               |       |        |        |               |       |        |        |               |       |        |        |                |       |        |        |                         |     |       |       |    |    |    |   |   |   |   |  |  |  |
| SGO_0137                                  |               | 3.653 |        |        |               | 3.653 |        |        |               | 3.653 |        |        |               |       |        |        |               |       |        |        |                |       |        |        |                         |     |       |       |    |    |    |   |   |   |   |  |  |  |
| V-type ATPase, D subunit                  |               |       |        |        |               |       |        |        |               |       |        |        |               |       |        |        |               |       |        |        |                |       |        |        |                         |     |       |       |    |    |    |   |   |   |   |  |  |  |
| SGO_0138                                  | 0.579         | 3.778 |        |        |               | 2.459 |        |        |               | 2.459 |        |        |               | 2.525 |        |        |               | 1.914 |        |        |                |       |        |        |                         |     |       |       |    |    |    |   |   |   |   |  |  |  |
| LysM domain protein                       |               |       |        |        |               |       |        |        |               |       |        |        |               |       |        |        |               |       |        |        |                |       |        |        |                         |     |       |       |    |    |    |   |   |   |   |  |  |  |
| SGO_0139                                  | <b>0.506</b>  | 7.391 | 0.0013 | 0.0027 | <b>0.581</b>  | 7.434 | 0.0007 | 0.0010 | -0.511        | 6.896 | 0.0090 | 0.0555 | 0.074         | 7.146 | 0.0368 | 0.2375 | <b>-1.017</b> | 6.088 | 0.0023 | 0.0056 | -1.092         | 6.748 | 0.0063 | 0.0038 |                         |     |       |       |    |    |    |   |   |   |   |  |  |  |
| thrC; threonine synthase                  |               |       |        |        |               |       |        |        |               |       |        |        |               |       |        |        |               |       |        |        |                |       |        |        |                         |     |       |       |    |    |    |   |   |   |   |  |  |  |
| SGO_0142                                  |               | 1.585 |        |        |               | 1.585 |        |        |               | 1.585 |        |        |               |       |        |        |               |       |        |        |                |       |        |        |                         |     |       |       |    |    |    |   |   |   |   |  |  |  |
| hypothetical protein SGO_0142             |               |       |        |        |               |       |        |        |               |       |        |        |               |       |        |        |               |       |        |        |                |       |        |        |                         |     |       |       |    |    |    |   |   |   |   |  |  |  |
| SGO_0144                                  | <b>-1.032</b> | 5.671 | 0.0020 | 0.0050 | -2.511        | 5.213 | 0.0174 | 0.0651 |               | 5.092 |        |        | -1.478        | 3.796 | 0.0265 | 0.1585 |               | 2.951 |        |        |                | 1.063 |        |        |                         |     |       |       |    |    |    |   |   |   |   |  |  |  |
| hypothetical protein SGO_0144             |               |       |        |        |               |       |        |        |               |       |        |        |               |       |        |        |               |       |        |        |                |       |        |        |                         |     |       |       |    |    |    |   |   |   |   |  |  |  |
| SGO_0145                                  | 0.275         | 8.112 | 0.0341 | 0.1807 | <b>-0.566</b> | 7.699 | 0.0007 | 0.0009 | <b>-0.848</b> | 7.593 | 0.0004 | 0.0009 | -0.841        | 7.372 | 0.0061 | 0.0248 | <b>-1.124</b> | 6.669 | 0.0048 | 0.0153 | -0.282         | 6.743 | 0.0224 | 0.0329 |                         |     |       |       |    |    |    |   |   |   |   |  |  |  |
| polI; DNA polymerase I                    |               |       |        |        |               |       |        |        |               |       |        |        |               |       |        |        |               |       |        |        |                |       |        |        |                         |     |       |       |    |    |    |   |   |   |   |  |  |  |
| SGO_0146                                  | <b>1.056</b>  | 6.377 | 0.0048 | 0.0152 | 0.659         | 6.116 | 0.0087 | 0.0278 | 0.244         | 5.991 | 0.0505 | 0.4436 | -0.397        | 6.110 | 0.0195 | 0.1112 | -0.812        | 5.412 | 0.0355 | 0.2024 | -0.416         | 5.791 | 0.1828 | 0.6415 |                         |     |       |       |    |    |    |   |   |   |   |  |  |  |
| CoA-binding domain protein                |               |       |        |        |               |       |        |        |               |       |        |        |               |       |        |        |               |       |        |        |                |       |        |        |                         |     |       |       |    |    |    |   |   |   |   |  |  |  |
| SGO_0148                                  |               | 4.387 |        |        | -1.225        | 4.667 | 0.0139 | 0.0492 |               | 4.387 |        |        |               | 1.648 |        |        |               |       |        |        |                | 1.648 |        |        |                         |     |       |       |    |    |    |   |   |   |   |  |  |  |
| hypothetical protein SGO_0148             |               |       |        |        |               |       |        |        |               |       |        |        |               |       |        |        |               |       |        |        |                |       |        |        |                         |     |       |       |    |    |    |   |   |   |   |  |  |  |
| SGO_0150                                  |               | 1.379 |        |        |               | 1.380 |        |        |               | 1.380 |        |        |               |       |        |        |               |       |        |        |                |       |        |        |                         |     |       |       |    |    |    |   |   |   |   |  |  |  |
| fucA1; alpha-L-fucosidase                 |               |       |        |        |               |       |        |        |               |       |        |        |               |       |        |        |               |       |        |        |                |       |        |        |                         |     |       |       |    |    |    |   |   |   |   |  |  |  |
| SGO_0152                                  | 0.387         | 5.773 | 0.0519 | 0.2961 | <b>1.009</b>  | 6.079 | 0.0003 | 0.0003 | <b>-0.431</b> | 5.291 | 0.0027 | 0.0119 | 0.622         | 5.762 | 0.0322 | 0.1998 | -0.818        | 4.490 | 0.0268 | 0.1420 | <b>-1.441</b>  | 5.438 | 0.0019 | 0.0003 |                         |     |       |       |    |    |    |   |   |   |   |  |  |  |
| tgt; queuine tRNA-ribosyltransferase      |               |       |        |        |               |       |        |        |               |       |        |        |               |       |        |        |               |       |        |        |                |       |        |        |                         |     |       |       |    |    |    |   |   |   |   |  |  |  |

Show detected proteins only  
 Show all proteins

Filter by category:

Proteins found:  
1179

Dot Plots  
Dot Plots

Test Cutoff

q-Value p-Value

.005

| Signif | Direction | Applies To   |
|--------|-----------|--------------|
| yes    | +         | ratios, bars |
| no     | n/a       | bars         |
| yes    | -         | ratios, bars |
| yes    | +         | p-, q-Values |
| yes    | -         | p-, q-Values |



Summary Table SgFn vs Sg SgPg vs Sg SgPgFn vs Sg SgPg v SgFn SgPgFn v SgFn SgPgFn vs SgPg Coverage

| Protein                                                                                             | SgFn vs Sg |        |        |        | SgPg vs Sg |        |        |        | SgPgFn vs Sg |        |        |        | SgPg v SgFn |        |        |        | SgPgFn v SgFn |        |        |        | SgPgFn vs SgPg |        |        |        | Log <sub>2</sub> Ratios |     |       |       |    |    |    |   |   |   |   |  |
|-----------------------------------------------------------------------------------------------------|------------|--------|--------|--------|------------|--------|--------|--------|--------------|--------|--------|--------|-------------|--------|--------|--------|---------------|--------|--------|--------|----------------|--------|--------|--------|-------------------------|-----|-------|-------|----|----|----|---|---|---|---|--|
|                                                                                                     | Ratio      | Sum    | q-Val  | p-Val  | Ratio      | Sum    | q-Val  | p-Val  | Ratio        | Sum    | q-Val  | p-Val  | Ratio       | Sum    | q-Val  | p-Val  | Ratio         | Sum    | q-Val  | p-Val  | Ratio          | Sum    | q-Val  | p-Val  | Ratio                   | Sum | q-Val | p-Val | -6 | -4 | -2 | 0 | 2 | 4 | 6 |  |
| <b>SGO_0154</b>                                                                                     | 1.787      | 11.314 | 0.0007 | 0.0010 | 0.517      | 10.445 | 0.0109 | 0.0367 | 0.826        | 10.628 | 0.0007 | 0.0018 | -1.270      | 10.934 | 0.0011 | 0.0022 | -0.961        | 10.418 | 0.0014 | 0.0025 | 0.309          | 10.324 | 0.0256 | 0.0417 |                         |     |       |       |    |    |    |   |   |   |   |  |
| pgi; glucose-6-phosphate isomerase                                                                  |            |        |        |        |            |        |        |        |              |        |        |        |             |        |        |        |               |        |        |        |                |        |        |        |                         |     |       |       |    |    |    |   |   |   |   |  |
| <b>SGO_0155</b>                                                                                     |            | 8.348  |        |        | -4.703     | 8.402  | 0.0009 | 0.0014 |              | 8.348  |        |        |             | 3.118  |        |        |               |        |        |        |                | 3.118  |        |        |                         |     |       |       |    |    |    |   |   |   |   |  |
| hypothetical protein SGO_0155                                                                       |            |        |        |        |            |        |        |        |              |        |        |        |             |        |        |        |               |        |        |        |                |        |        |        |                         |     |       |       |    |    |    |   |   |   |   |  |
| <b>SGO_0156</b>                                                                                     |            | 7.444  |        |        | -2.580     | 7.668  | 0.0004 | 0.0004 | -2.949       | 7.620  | 0.0003 | 0.0003 |             | 4.357  |        |        |               | 3.370  |        |        | -0.369         | 5.181  | 0.0319 | 0.0567 |                         |     |       |       |    |    |    |   |   |   |   |  |
| hypothetical protein SGO_0156                                                                       |            |        |        |        |            |        |        |        |              |        |        |        |             |        |        |        |               |        |        |        |                |        |        |        |                         |     |       |       |    |    |    |   |   |   |   |  |
| <b>SGO_0157</b>                                                                                     |            | 3.357  |        |        |            | 3.357  |        |        |              | 3.357  |        |        |             |        |        |        |               |        |        |        |                |        |        |        |                         |     |       |       |    |    |    |   |   |   |   |  |
| hypothetical protein SGO_0157                                                                       |            |        |        |        |            |        |        |        |              |        |        |        |             |        |        |        |               |        |        |        |                |        |        |        |                         |     |       |       |    |    |    |   |   |   |   |  |
| <b>SGO_0158</b>                                                                                     | 2.802      | 8.548  | 0.0003 | 0.0002 | 1.379      | 7.403  | 0.0009 | 0.0014 | 1.833        | 7.756  | 0.0014 | 0.0050 | -1.423      | 8.300  | 0.0006 | 0.0007 | -0.969        | 7.832  | 0.0020 | 0.0047 | 0.454          | 7.674  | 0.0376 | 0.0735 |                         |     |       |       |    |    |    |   |   |   |   |  |
| 2,3,4,5-tetrahydropyridine-2-carboxylate N-succinyltransferase, putative                            |            |        |        |        |            |        |        |        |              |        |        |        |             |        |        |        |               |        |        |        |                |        |        |        |                         |     |       |       |    |    |    |   |   |   |   |  |
| <b>SGO_0159</b>                                                                                     | 1.294      | 3.787  |        |        | -0.424     | 2.804  |        |        |              | 2.000  |        |        | -1.718      | 3.164  |        |        |               | 2.170  |        |        |                | 1.063  |        |        |                         |     |       |       |    |    |    |   |   |   |   |  |
| hippurate hydrolase                                                                                 |            |        |        |        |            |        |        |        |              |        |        |        |             |        |        |        |               |        |        |        |                |        |        |        |                         |     |       |       |    |    |    |   |   |   |   |  |
| <b>SGO_0163</b>                                                                                     | 0.563      | 7.521  | 0.0030 | 0.0085 | 0.746      | 7.631  | 0.0010 | 0.0016 | 0.009        | 7.216  | 0.1026 | 0.9909 | 0.182       | 7.353  | 0.0069 | 0.0286 | -0.555        | 6.398  | 0.0013 | 0.0022 | -0.737         | 7.118  | 0.0007 | 0.0000 |                         |     |       |       |    |    |    |   |   |   |   |  |
| galU; UTP-glucose-1-phosphate uridylyltransferase                                                   |            |        |        |        |            |        |        |        |              |        |        |        |             |        |        |        |               |        |        |        |                |        |        |        |                         |     |       |       |    |    |    |   |   |   |   |  |
| <b>SGO_0164</b>                                                                                     | 0.296      | 7.639  | 0.0213 | 0.0992 | -0.280     | 7.349  | 0.0252 | 0.1009 | -0.524       | 7.239  | 0.0018 | 0.0071 | -0.577      | 7.010  | 0.0080 | 0.0354 | -0.821        | 6.303  | 0.0038 | 0.0111 | -0.244         | 6.572  | 0.0594 | 0.1433 |                         |     |       |       |    |    |    |   |   |   |   |  |
| Glycerol-3-phosphate dehydrogenase [NAD(P)+] (NAD(P)H-dependent glycerol-3-phosphate dehydrogenase) |            |        |        |        |            |        |        |        |              |        |        |        |             |        |        |        |               |        |        |        |                |        |        |        |                         |     |       |       |    |    |    |   |   |   |   |  |
| <b>SGO_0165</b>                                                                                     |            | 4.275  |        |        |            | 4.275  |        |        |              | 4.275  |        |        |             |        |        |        |               |        |        |        |                |        |        |        |                         |     |       |       |    |    |    |   |   |   |   |  |
| ABC transporter, permease/ATP-binding protein SP2075                                                |            |        |        |        |            |        |        |        |              |        |        |        |             |        |        |        |               |        |        |        |                |        |        |        |                         |     |       |       |    |    |    |   |   |   |   |  |
| <b>SGO_0166</b>                                                                                     |            | 6.237  |        |        | -2.723     | 6.342  | 0.0082 | 0.0256 |              | 6.237  |        |        |             | 2.000  |        |        |               |        |        |        |                | 2.000  |        |        |                         |     |       |       |    |    |    |   |   |   |   |  |
| ABC transporter, permease/ATP-binding protein SP2073                                                |            |        |        |        |            |        |        |        |              |        |        |        |             |        |        |        |               |        |        |        |                |        |        |        |                         |     |       |       |    |    |    |   |   |   |   |  |
| <b>SGO_0167</b>                                                                                     |            | 4.020  |        |        |            | 4.020  |        |        |              | 4.020  |        |        |             |        |        |        |               |        |        |        |                |        |        |        |                         |     |       |       |    |    |    |   |   |   |   |  |
| glutamine amidotransferase                                                                          |            |        |        |        |            |        |        |        |              |        |        |        |             |        |        |        |               |        |        |        |                |        |        |        |                         |     |       |       |    |    |    |   |   |   |   |  |
| <b>SGO_0168</b>                                                                                     | -0.600     | 4.566  | 0.0250 | 0.1212 |            | 4.156  |        |        |              | 4.156  |        |        |             | 2.039  |        |        |               | 1.429  |        |        |                |        |        |        |                         |     |       |       |    |    |    |   |   |   |   |  |
| hydrolase, NUDIX family                                                                             |            |        |        |        |            |        |        |        |              |        |        |        |             |        |        |        |               |        |        |        |                |        |        |        |                         |     |       |       |    |    |    |   |   |   |   |  |
| <b>SGO_0169</b>                                                                                     | 1.929      | 6.595  | 0.0023 | 0.0059 | 0.502      | 5.611  | 0.0352 | 0.1490 | 0.646        | 5.680  | 0.0064 | 0.0364 | -1.427      | 6.200  | 0.0032 | 0.0101 | -1.283        | 5.622  | 0.0033 | 0.0094 | 0.144          | 5.383  | 0.1609 | 0.5407 |                         |     |       |       |    |    |    |   |   |   |   |  |
| dut; dUTP diphosphatase                                                                             |            |        |        |        |            |        |        |        |              |        |        |        |             |        |        |        |               |        |        |        |                |        |        |        |                         |     |       |       |    |    |    |   |   |   |   |  |
| <b>SGO_0171</b>                                                                                     | -0.989     | 5.628  | 0.0409 | 0.2246 | -0.402     | 6.118  | 0.0338 | 0.1424 | -1.565       | 5.530  | 0.0219 | 0.1728 | 0.587       | 4.795  | 0.0400 | 0.2623 | -0.576        | 2.911  |        |        | -1.163         | 4.672  | 0.0664 | 0.1664 |                         |     |       |       |    |    |    |   |   |   |   |  |
| radA; DNA repair protein RadA                                                                       |            |        |        |        |            |        |        |        |              |        |        |        |             |        |        |        |               |        |        |        |                |        |        |        |                         |     |       |       |    |    |    |   |   |   |   |  |
| <b>SGO_0172</b>                                                                                     | -0.682     | 6.005  | 0.0089 | 0.0337 |            | 5.614  |        |        |              | 5.614  |        |        |             | 3.418  |        |        |               | 2.807  |        |        |                |        |        |        |                         |     |       |       |    |    |    |   |   |   |   |  |
| conserved hypothetical protein TIGR00266                                                            |            |        |        |        |            |        |        |        |              |        |        |        |             |        |        |        |               |        |        |        |                |        |        |        |                         |     |       |       |    |    |    |   |   |   |   |  |
| <b>SGO_0173</b>                                                                                     | -1.237     | 7.924  | 0.0003 | 0.0002 | -3.121     | 7.570  | 0.0001 | 0.0000 |              | 7.412  |        |        | -1.884      | 6.016  | 0.0008 | 0.0013 |               | 5.058  |        |        |                | 3.790  |        |        |                         |     |       |       |    |    |    |   |   |   |   |  |
| Carbonic anhydrase                                                                                  |            |        |        |        |            |        |        |        |              |        |        |        |             |        |        |        |               |        |        |        |                |        |        |        |                         |     |       |       |    |    |    |   |   |   |   |  |

Show detected proteins only  
 Show all proteins

Filter by category:

Proteins found:  
1179

Dot Plots  
Dot Plots

Test Cutoff

q-Value p-Value

.005

| Signif | Direction | Applies To   |
|--------|-----------|--------------|
| yes    | +         | ratios, bars |
| no     | n/a       | bars         |
| yes    | -         | ratios, bars |
| yes    | +         | p-, q-Values |
| yes    | -         | p-, q-Values |



Summary Table SgFn vs Sg SgPg vs Sg SgPgFn vs Sg SgPg v SgFn SgPgFn v SgFn SgPgFn vs SgPg Coverage

| Protein                                             | SgFn vs Sg |       |        |        | SgPg vs Sg |       |        |        | SgPgFn vs Sg |       |        |        | SgPg v SgFn |       |        |        | SgPgFn v SgFn |       |        |        | SgPgFn vs SgPg |       |        |        | Log <sub>2</sub> Ratios |     |       |       |    |    |    |   |   |   |   |  |  |  |  |  |  |  |  |
|-----------------------------------------------------|------------|-------|--------|--------|------------|-------|--------|--------|--------------|-------|--------|--------|-------------|-------|--------|--------|---------------|-------|--------|--------|----------------|-------|--------|--------|-------------------------|-----|-------|-------|----|----|----|---|---|---|---|--|--|--|--|--|--|--|--|
|                                                     | Ratio      | Sum   | q-Val  | p-Val  | Ratio      | Sum   | q-Val  | p-Val  | Ratio        | Sum   | q-Val  | p-Val  | Ratio       | Sum   | q-Val  | p-Val  | Ratio         | Sum   | q-Val  | p-Val  | Ratio          | Sum   | q-Val  | p-Val  | Ratio                   | Sum | q-Val | p-Val | -6 | -4 | -2 | 0 | 2 | 4 | 6 |  |  |  |  |  |  |  |  |
| SGO_0174                                            | 0.758      | 8.458 | 0.0073 | 0.0266 | 1.114      | 8.678 | 0.0001 | 0.0000 | 0.684        | 8.400 | 0.0008 | 0.0023 | 0.356       | 8.459 | 0.0157 | 0.0841 | -0.073        | 7.627 | 0.0875 | 0.6035 | -0.429         | 8.419 | 0.0055 | 0.0029 |                         |     |       |       |    |    |    |   |   |   |   |  |  |  |  |  |  |  |  |
| gltX; glutamyl-tRNA synthetase                      |            |       |        |        |            |       |        |        |              |       |        |        |             |       |        |        |               |       |        |        |                |       |        |        |                         |     |       |       |    |    |    |   |   |   |   |  |  |  |  |  |  |  |  |
| SGO_0179                                            |            | 2.585 |        |        |            | 2.585 |        |        |              | 2.585 |        |        |             |       |        |        |               |       |        |        |                |       |        |        |                         |     |       |       |    |    |    |   |   |   |   |  |  |  |  |  |  |  |  |
| Membrane protein oxaA 1 precursor                   |            |       |        |        |            |       |        |        |              |       |        |        |             |       |        |        |               |       |        |        |                |       |        |        |                         |     |       |       |    |    |    |   |   |   |   |  |  |  |  |  |  |  |  |
| SGO_0180                                            | -0.946     | 6.660 | 0.0122 | 0.0506 | -0.132     | 7.007 | 0.1414 | 0.7291 | -1.123       | 6.647 | 0.0120 | 0.0809 | 0.815       | 6.068 | 0.0151 | 0.0803 | -0.177        | 4.949 | 0.1287 | 0.9284 | -0.991         | 6.054 | 0.0521 | 0.1201 |                         |     |       |       |    |    |    |   |   |   |   |  |  |  |  |  |  |  |  |
| jag; hypothetical protein SGO_0180                  |            |       |        |        |            |       |        |        |              |       |        |        |             |       |        |        |               |       |        |        |                |       |        |        |                         |     |       |       |    |    |    |   |   |   |   |  |  |  |  |  |  |  |  |
| SGO_0181                                            |            | 5.217 |        |        |            | 5.217 |        |        |              | 5.217 |        |        |             |       |        |        |               |       |        |        |                |       |        |        |                         |     |       |       |    |    |    |   |   |   |   |  |  |  |  |  |  |  |  |
| lipoprotein, putative                               |            |       |        |        |            |       |        |        |              |       |        |        |             |       |        |        |               |       |        |        |                |       |        |        |                         |     |       |       |    |    |    |   |   |   |   |  |  |  |  |  |  |  |  |
| SGO_0182                                            | 0.723      | 4.937 | 0.0798 | 0.4978 |            | 2.700 |        |        |              | 2.700 |        |        |             | 4.080 |        |        |               | 3.469 |        |        |                |       |        |        |                         |     |       |       |    |    |    |   |   |   |   |  |  |  |  |  |  |  |  |
| sapR; sakacin A production response regulator       |            |       |        |        |            |       |        |        |              |       |        |        |             |       |        |        |               |       |        |        |                |       |        |        |                         |     |       |       |    |    |    |   |   |   |   |  |  |  |  |  |  |  |  |
| SGO_0188                                            | -0.017     | 5.264 | 0.1383 | 0.9279 | -0.745     | 4.646 | 0.0473 | 0.2076 |              | 4.272 |        |        | -0.729      | 4.120 | 0.0340 | 0.2137 |               | 3.132 |        |        |                | 2.000 |        |        |                         |     |       |       |    |    |    |   |   |   |   |  |  |  |  |  |  |  |  |
| hydrolase, TatD family                              |            |       |        |        |            |       |        |        |              |       |        |        |             |       |        |        |               |       |        |        |                |       |        |        |                         |     |       |       |    |    |    |   |   |   |   |  |  |  |  |  |  |  |  |
| SGO_0189                                            |            | 1.585 |        |        |            | 1.585 |        |        |              | 1.585 |        |        |             |       |        |        |               |       |        |        |                |       |        |        |                         |     |       |       |    |    |    |   |   |   |   |  |  |  |  |  |  |  |  |
| primase-related protein                             |            |       |        |        |            |       |        |        |              |       |        |        |             |       |        |        |               |       |        |        |                |       |        |        |                         |     |       |       |    |    |    |   |   |   |   |  |  |  |  |  |  |  |  |
| SGO_0190                                            |            | 5.130 |        |        | -1.685     | 5.563 | 0.0110 | 0.0370 | -1.173       | 5.410 | 0.0326 | 0.2689 |             | 3.103 |        |        |               | 1.783 |        |        |                | 0.512 | 3.791  | 0.2040 | 0.7382                  |     |       |       |    |    |    |   |   |   |   |  |  |  |  |  |  |  |  |
| hypothetical protein SGO_0190                       |            |       |        |        |            |       |        |        |              |       |        |        |             |       |        |        |               |       |        |        |                |       |        |        |                         |     |       |       |    |    |    |   |   |   |   |  |  |  |  |  |  |  |  |
| SGO_0191                                            |            | 4.351 |        |        | -1.774     | 4.548 | 0.0060 | 0.0179 |              | 4.351 |        |        |             | 1.063 |        |        |               |       |        |        |                | 1.063 |        |        |                         |     |       |       |    |    |    |   |   |   |   |  |  |  |  |  |  |  |  |
| hypothetical protein SGO_0191                       |            |       |        |        |            |       |        |        |              |       |        |        |             |       |        |        |               |       |        |        |                |       |        |        |                         |     |       |       |    |    |    |   |   |   |   |  |  |  |  |  |  |  |  |
| SGO_0193                                            | 0.004      | 4.805 | 0.1428 | 0.9653 | 0.844      | 5.139 | 0.0514 | 0.2304 |              | 3.820 |        |        | 0.840       | 4.614 | 0.0309 | 0.1910 |               | 2.666 |        |        |                | 3.887 |        |        |                         |     |       |       |    |    |    |   |   |   |   |  |  |  |  |  |  |  |  |
| ksgA; dimethyladenosine transferase                 |            |       |        |        |            |       |        |        |              |       |        |        |             |       |        |        |               |       |        |        |                |       |        |        |                         |     |       |       |    |    |    |   |   |   |   |  |  |  |  |  |  |  |  |
| SGO_0197                                            |            | 4.429 |        |        |            | 3.541 |        |        |              | 3.170 |        |        | -0.890      | 4.539 | 0.0020 | 0.0048 | -0.253        | 3.809 | 0.0515 | 0.3175 | 0.637          | 3.854 | 0.0520 | 0.1190 |                         |     |       |       |    |    |    |   |   |   |   |  |  |  |  |  |  |  |  |
| predicted ribosome small subunit-dependent GTPase A |            |       |        |        |            |       |        |        |              |       |        |        |             |       |        |        |               |       |        |        |                |       |        |        |                         |     |       |       |    |    |    |   |   |   |   |  |  |  |  |  |  |  |  |
| SGO_0198                                            | 2.600      | 8.472 | 0.0001 | 0.0001 | 0.896      | 7.170 | 0.0011 | 0.0017 | 0.364        | 6.853 | 0.0122 | 0.0827 | -1.704      | 8.123 | 0.0002 | 0.0001 | -2.236        | 7.405 | 0.0002 | 0.0001 | -0.532         | 6.794 | 0.0089 | 0.0068 |                         |     |       |       |    |    |    |   |   |   |   |  |  |  |  |  |  |  |  |
| rpe; ribulose-phosphate 3-epimerase                 |            |       |        |        |            |       |        |        |              |       |        |        |             |       |        |        |               |       |        |        |                |       |        |        |                         |     |       |       |    |    |    |   |   |   |   |  |  |  |  |  |  |  |  |
| SGO_0200                                            | -1.421     | 7.784 | 0.0001 | 0.0001 | -1.166     | 7.858 | 0.0002 | 0.0001 | -1.758       | 7.706 | 0.0003 | 0.0003 | 0.255       | 6.525 | 0.0010 | 0.0018 | -0.337        | 5.633 | 0.0212 | 0.1059 | -0.591         | 6.391 | 0.0165 | 0.0202 |                         |     |       |       |    |    |    |   |   |   |   |  |  |  |  |  |  |  |  |
| competence-induced protein Ccs50                    |            |       |        |        |            |       |        |        |              |       |        |        |             |       |        |        |               |       |        |        |                |       |        |        |                         |     |       |       |    |    |    |   |   |   |   |  |  |  |  |  |  |  |  |
| SGO_0201                                            | 1.296      | 8.289 | 0.0028 | 0.0079 | -0.173     | 7.404 | 0.0277 | 0.1122 | -1.090       | 7.048 | 0.0011 | 0.0034 | -1.470      | 7.726 | 0.0022 | 0.0060 | -2.387        | 6.927 | 0.0016 | 0.0032 | -0.917         | 6.416 | 0.0048 | 0.0017 |                         |     |       |       |    |    |    |   |   |   |   |  |  |  |  |  |  |  |  |
| cmp-binding-factor 1                                |            |       |        |        |            |       |        |        |              |       |        |        |             |       |        |        |               |       |        |        |                |       |        |        |                         |     |       |       |    |    |    |   |   |   |   |  |  |  |  |  |  |  |  |
| SGO_0202                                            | 0.149      | 5.698 | 0.0870 | 0.5536 | -0.101     | 5.559 | 0.1063 | 0.5282 |              | 4.619 |        |        | -0.250      | 5.128 | 0.0384 | 0.2496 |               | 3.648 |        |        |                | 3.983 |        |        |                         |     |       |       |    |    |    |   |   |   |   |  |  |  |  |  |  |  |  |
| pur operon repressor                                |            |       |        |        |            |       |        |        |              |       |        |        |             |       |        |        |               |       |        |        |                |       |        |        |                         |     |       |       |    |    |    |   |   |   |   |  |  |  |  |  |  |  |  |
| SGO_0203                                            |            | 2.700 |        |        |            | 2.700 |        |        |              | 2.700 |        |        |             |       |        |        |               |       |        |        |                |       |        |        |                         |     |       |       |    |    |    |   |   |   |   |  |  |  |  |  |  |  |  |
| hypothetical protein SGO_0203                       |            |       |        |        |            |       |        |        |              |       |        |        |             |       |        |        |               |       |        |        |                |       |        |        |                         |     |       |       |    |    |    |   |   |   |   |  |  |  |  |  |  |  |  |

Show detected proteins only  
 Show all proteins

Filter by category:

Proteins found:  
1179

Test Cutoff

| Signif | Direction | Applies To   |
|--------|-----------|--------------|
| yes    | +         | ratios, bars |
| no     | n/a       | bars         |
| yes    | -         | ratios, bars |
| yes    | +         | p-, q-Values |
| yes    | -         | p-, q-Values |

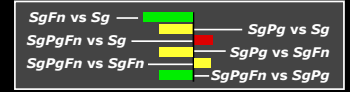

Summary Table SgFn vs Sg SgPg vs Sg SgPgFn vs Sg SgPg v SgFn SgPgFn v SgFn SgPgFn vs SgPg Coverage

| Protein                                                                       | SgFn vs Sg    |        |               |               | SgPg vs Sg    |        |               |               | SgPgFn vs Sg |        |               |               | SgPg v SgFn   |        |               |               | SgPgFn v SgFn |        |               |               | SgPgFn vs SgPg |        |               |               | Log <sub>2</sub> Ratios |     |       |       |    |    |    |   |   |   |   |  |
|-------------------------------------------------------------------------------|---------------|--------|---------------|---------------|---------------|--------|---------------|---------------|--------------|--------|---------------|---------------|---------------|--------|---------------|---------------|---------------|--------|---------------|---------------|----------------|--------|---------------|---------------|-------------------------|-----|-------|-------|----|----|----|---|---|---|---|--|
|                                                                               | Ratio         | Sum    | q-Val         | p-Val         | Ratio         | Sum    | q-Val         | p-Val         | Ratio        | Sum    | q-Val         | p-Val         | Ratio         | Sum    | q-Val         | p-Val         | Ratio         | Sum    | q-Val         | p-Val         | Ratio          | Sum    | q-Val         | p-Val         | Ratio                   | Sum | q-Val | p-Val | -6 | -4 | -2 | 0 | 2 | 4 | 6 |  |
| <b>SGO_0204</b><br>rpsL; ribosomal protein S12                                | -0.081        | 8.109  | 0.1339        | 0.8941        | 0.094         | 8.177  | 0.0899        | 0.4380        | -0.064       | 8.092  | 0.0304        | 0.2491        | 0.174         | 7.649  | 0.0829        | 0.6053        | 0.016         | 6.952  | 0.1239        | 0.8855        | -0.158         | 7.633  | 0.0830        | 0.2217        |                         |     |       |       |    |    |    |   |   |   |   |  |
| <b>SGO_0205</b><br>rpsG; ribosomal protein S7                                 | 0.380         | 9.252  | 0.0236        | 0.1119        | 0.726         | 9.456  | 0.0085        | 0.0269        | <b>0.797</b> | 9.499  | <b>0.0036</b> | 0.0174        | 0.345         | 9.103  | 0.0281        | 0.1707        | 0.417         | 8.530  | 0.0214        | 0.1072        | 0.071          | 9.299  | 0.2016        | 0.7269        |                         |     |       |       |    |    |    |   |   |   |   |  |
| <b>SGO_0206</b><br>fusA; translation elongation factor G                      | <b>0.449</b>  | 12.222 | <b>0.0005</b> | <b>0.0006</b> | <b>0.873</b>  | 12.482 | <b>0.0002</b> | <b>0.0001</b> | <b>1.012</b> | 12.576 | <b>0.0006</b> | <b>0.0015</b> | <b>0.424</b>  | 12.143 | <b>0.0008</b> | <b>0.0013</b> | <b>0.564</b>  | 11.617 | <b>0.0024</b> | <b>0.0061</b> | 0.140          | 12.413 | 0.0590        | 0.1419        |                         |     |       |       |    |    |    |   |   |   |   |  |
| <b>SGO_0207</b><br>gap; glyceraldehyde-3-phosphate dehydrogenase, type I      | <b>1.189</b>  | 12.534 | <b>0.0005</b> | <b>0.0007</b> | <b>1.071</b>  | 12.454 | <b>0.0007</b> | <b>0.0010</b> | <b>1.446</b> | 12.724 | <b>0.0010</b> | <b>0.0034</b> | <b>-0.118</b> | 12.434 | <b>0.0006</b> | <b>0.0008</b> | 0.257         | 12.020 | 0.0183        | 0.0872        | 0.375          | 12.579 | 0.0248        | 0.0399        |                         |     |       |       |    |    |    |   |   |   |   |  |
| <b>SGO_0208</b><br>LPXTG cell wall surface protein, glycosyl hydrolase family | 0.596         | 6.284  | 0.0337        | 0.1782        |               | 4.996  |               |               |              | 4.996  |               |               |               | 5.011  |               |               |               | 4.400  |               |               |                |        |               |               |                         |     |       |       |    |    |    |   |   |   |   |  |
| <b>SGO_0209</b><br>pgk; phosphoglycerate kinase                               | <b>1.455</b>  | 12.630 | <b>0.0002</b> | <b>0.0001</b> | <b>2.191</b>  | 13.204 | <b>0.0002</b> | <b>0.0001</b> | <b>1.708</b> | 12.819 | <b>0.0001</b> | <b>0.0000</b> | <b>0.736</b>  | 13.083 | <b>0.0007</b> | <b>0.0009</b> | <b>0.252</b>  | 12.189 | <b>0.0031</b> | <b>0.0085</b> | <b>-0.484</b>  | 13.183 | <b>0.0050</b> | <b>0.0022</b> |                         |     |       |       |    |    |    |   |   |   |   |  |
| <b>SGO_0210</b><br>sspA; streptococcal surface protein A                      | -0.950        | 8.543  | 0.0059        | 0.0198        | <b>-5.424</b> | 7.976  | <b>0.0012</b> | <b>0.0020</b> |              | 7.943  |               |               | <b>-4.474</b> | 6.540  | <b>0.0009</b> | <b>0.0016</b> |               | 5.865  |               |               |                | 2.024  |               |               |                         |     |       |       |    |    |    |   |   |   |   |  |
| <b>SGO_0211</b><br>sspB; streptococcal surface protein B                      | <b>-4.047</b> | 9.262  | <b>0.0003</b> | <b>0.0003</b> |               | 9.177  |               |               |              | 9.177  |               |               |               | 4.614  |               |               |               | 4.003  |               |               |                |        |               |               |                         |     |       |       |    |    |    |   |   |   |   |  |
| <b>SGO_0214</b><br>transcription regulator, MerR family                       |               | 1.322  |               |               |               | 1.322  |               |               |              | 1.322  |               |               |               |        |               |               |               |        |               |               |                |        |               |               |                         |     |       |       |    |    |    |   |   |   |   |  |
| <b>SGO_0215</b><br>glnA; glutamine synthetase, type I                         | <b>0.153</b>  | 8.746  | <b>0.0017</b> | <b>0.0040</b> | -0.087        | 8.628  | 0.0722        | 0.3407        | -0.427       | 8.481  | 0.0090        | 0.0555        | -0.240        | 8.195  | 0.0085        | 0.0389        | -0.579        | 7.445  | 0.0059        | 0.0205        | -0.339         | 7.921  | 0.0562        | 0.1327        |                         |     |       |       |    |    |    |   |   |   |   |  |
| <b>SGO_0219</b><br>metallo-beta-lactamase superfamily protein 1               | -0.136        | 8.107  | 0.0278        | 0.1417        | 0.237         | 8.297  | 0.0080        | 0.0251        | -0.152       | 8.101  | 0.0183        | 0.1387        | <b>0.373</b>  | 7.721  | <b>0.0007</b> | <b>0.0008</b> | -0.016        | 6.905  | 0.1133        | 0.8056        | <b>-0.389</b>  | 7.715  | <b>0.0050</b> | <b>0.0021</b> |                         |     |       |       |    |    |    |   |   |   |   |  |
| <b>SGO_0220</b><br>Protein of unknown function (DUF1447) superfamily          |               | 3.446  |               |               |               | 4.294  |               |               |              |        |               |               | -0.171        | 4.418  | 0.0848        | 0.6214        |               | 2.322  |               |               |                | 3.781  |               |               |                         |     |       |       |    |    |    |   |   |   |   |  |
| <b>SGO_0223</b><br>glycoproteinase family protein                             | 0.818         | 4.028  | 0.0150        | 0.0659        | 1.487         | 4.380  | 0.0087        | 0.0279        |              | 3.118  |               |               | 0.669         | 3.791  |               |               |               | 1.807  |               |               |                | 3.087  |               |               |                         |     |       |       |    |    |    |   |   |   |   |  |
| <b>SGO_0230</b><br>Protein of unknown function, DUF536 family                 | -0.275        | 5.406  | 0.1056        | 0.6858        | <b>0.665</b>  | 5.843  | <b>0.0050</b> | <b>0.0141</b> | 0.773        | 5.967  | 0.0163        | 0.1203        | 0.940         | 5.270  | 0.0117        | 0.0564        | 1.048         | 4.788  | 0.0233        | 0.1196        | 0.108          | 5.720  | 0.1672        | 0.5724        |                         |     |       |       |    |    |    |   |   |   |   |  |
| <b>SGO_0231</b><br>glycerophosphoryl diester phosphodiesterase family protein |               | 3.111  |               |               |               | 3.111  |               |               |              | 3.111  |               |               |               |        |               |               |               |        |               |               |                |        |               |               |                         |     |       |       |    |    |    |   |   |   |   |  |
| <b>SGO_0232</b><br>conserved hypothetical protein TIGR00103                   |               | 1.807  |               |               | 1.663         | 4.738  | 0.0558        | 0.2527        | 1.561        | 4.606  | 0.0173        | 0.1289        |               | 4.022  |               |               |               | 3.258  |               |               | -0.102         | 4.947  | 0.1775        | 0.6200        |                         |     |       |       |    |    |    |   |   |   |   |  |

Show detected proteins only  
 Show all proteins  
 Filter by category:

Proteins found: 1179

[Dot Plots](#)

[Dot Plots](#)

**Test**      **Cutoff**

| Signif | Direction | Applies To   |
|--------|-----------|--------------|
| yes    | +         | ratios, bars |
| no     | n/a       | bars         |
| yes    | -         | ratios, bars |
| yes    | +         | p-, q-Values |
| yes    | -         | p-, q-Values |

SgFn vs Sg — █ — SgPg vs Sg

SgPgFn vs Sg — █ — SgPg vs SgFn

SgPgFn v SgFn — █ — SgPgFn vs SgPg

SgPgFn vs SgPg — █ — SgPgFn vs SgPg

Hendrickson et al.



Summary Table SgFn vs Sg SgPg vs Sg SgPgFn vs Sg SgPg v SgFn SgPgFn v SgFn SgPgFn vs SgPg Coverage

| Protein                                          | SgFn vs Sg |        |        |        | SgPg vs Sg |        |        |        | SgPgFn vs Sg |        |        |        | SgPg v SgFn |        |        |        | SgPgFn v SgFn |       |        |        | SgPgFn vs SgPg |       |        |        | Log <sub>2</sub> Ratios |     |       |       |    |    |    |   |   |   |   |  |
|--------------------------------------------------|------------|--------|--------|--------|------------|--------|--------|--------|--------------|--------|--------|--------|-------------|--------|--------|--------|---------------|-------|--------|--------|----------------|-------|--------|--------|-------------------------|-----|-------|-------|----|----|----|---|---|---|---|--|
|                                                  | Ratio      | Sum    | q-Val  | p-Val  | Ratio      | Sum    | q-Val  | p-Val  | Ratio        | Sum    | q-Val  | p-Val  | Ratio       | Sum    | q-Val  | p-Val  | Ratio         | Sum   | q-Val  | p-Val  | Ratio          | Sum   | q-Val  | p-Val  | Ratio                   | Sum | q-Val | p-Val | -6 | -4 | -2 | 0 | 2 | 4 | 6 |  |
| SGO_0233                                         | -1.071     | 6.570  | 0.0111 | 0.0442 |            | 5.976  |        |        |              | 5.976  |        |        |             | 4.491  |        |        |               | 3.881 |        |        |                |       |        |        |                         |     |       |       |    |    |    |   |   |   |   |  |
| lipoprotein, putative                            |            |        |        |        |            |        |        |        |              |        |        |        |             |        |        |        |               |       |        |        |                |       |        |        |                         |     |       |       |    |    |    |   |   |   |   |  |
| SGO_0234                                         | 0.223      | 7.887  | 0.0036 | 0.0108 | -0.219     | 7.669  | 0.0216 | 0.0849 | -0.741       | 7.449  | 0.0004 | 0.0009 | -0.442      | 7.280  | 0.0043 | 0.0153 | -0.964        | 6.469 | 0.0008 | 0.0008 | -0.522         | 6.807 | 0.0178 | 0.0227 |                         |     |       |       |    |    |    |   |   |   |   |  |
| pepX; X-Pro dipeptidyl-peptidase                 |            |        |        |        |            |        |        |        |              |        |        |        |             |        |        |        |               |       |        |        |                |       |        |        |                         |     |       |       |    |    |    |   |   |   |   |  |
| SGO_0235                                         |            | 6.742  |        |        | -1.563     | 7.157  | 0.0048 | 0.0133 |              | 6.742  |        |        |             | 4.642  |        |        |               |       |        |        |                | 4.642 |        |        |                         |     |       |       |    |    |    |   |   |   |   |  |
| glycerol uptake facilitator protein-like protein |            |        |        |        |            |        |        |        |              |        |        |        |             |        |        |        |               |       |        |        |                |       |        |        |                         |     |       |       |    |    |    |   |   |   |   |  |
| SGO_0236                                         |            | 4.509  |        |        |            | 4.509  |        |        |              | 4.509  |        |        |             |        |        |        |               |       |        |        |                |       |        |        |                         |     |       |       |    |    |    |   |   |   |   |  |
| hypothetical protein SGO_0236                    |            |        |        |        |            |        |        |        |              |        |        |        |             |        |        |        |               |       |        |        |                |       |        |        |                         |     |       |       |    |    |    |   |   |   |   |  |
| SGO_0237                                         | 0.811      | 5.501  | 0.0302 | 0.1571 | 1.319      | 5.790  | 0.0038 | 0.0097 | 0.200        | 5.141  | 0.0774 | 0.7214 | 0.508       | 5.557  | 0.0255 | 0.1510 | -0.611        | 4.436 | 0.0348 | 0.1970 | -1.119         | 5.325 | 0.0099 | 0.0084 |                         |     |       |       |    |    |    |   |   |   |   |  |
| ccpA; CcpA protein (proteinase)                  |            |        |        |        |            |        |        |        |              |        |        |        |             |        |        |        |               |       |        |        |                |       |        |        |                         |     |       |       |    |    |    |   |   |   |   |  |
| SGO_0240                                         |            | 2.836  |        |        |            | 2.836  |        |        |              | 2.836  |        |        |             |        |        |        |               |       |        |        |                |       |        |        |                         |     |       |       |    |    |    |   |   |   |   |  |
| mvaD; diphosphomevalonate decarboxylase          |            |        |        |        |            |        |        |        |              |        |        |        |             |        |        |        |               |       |        |        |                |       |        |        |                         |     |       |       |    |    |    |   |   |   |   |  |
| SGO_0242                                         | 1.066      | 2.687  |        |        |            | 1.058  |        |        |              | 1.058  |        |        |             | 1.611  |        |        |               | 1.000 |        |        |                |       |        |        |                         |     |       |       |    |    |    |   |   |   |   |  |
| FMN-dependent dehydrogenase family protein       |            |        |        |        |            |        |        |        |              |        |        |        |             |        |        |        |               |       |        |        |                |       |        |        |                         |     |       |       |    |    |    |   |   |   |   |  |
| SGO_0243                                         |            | 4.989  |        |        |            | 3.791  |        |        |              | 3.755  |        |        | -1.190      | 4.998  | 0.0013 | 0.0029 | -0.226        | 4.377 | 0.0612 | 0.3979 | 0.965          | 4.260 | 0.0166 | 0.0206 |                         |     |       |       |    |    |    |   |   |   |   |  |
| hydroxymethylglutaryl-CoA reductase, degradative |            |        |        |        |            |        |        |        |              |        |        |        |             |        |        |        |               |       |        |        |                |       |        |        |                         |     |       |       |    |    |    |   |   |   |   |  |
| SGO_0244                                         | 2.219      | 5.446  | 0.0014 | 0.0029 | 2.252      | 5.461  | 0.0003 | 0.0002 | 2.049        | 4.551  | 0.0023 | 0.0095 | 0.032       | 5.664  | 0.1189 | 0.9011 | -0.170        | 4.570 | 0.0834 | 0.5695 | -0.203         | 5.193 | 0.0935 | 0.2633 |                         |     |       |       |    |    |    |   |   |   |   |  |
| hydroxymethylglutaryl-CoA synthase               |            |        |        |        |            |        |        |        |              |        |        |        |             |        |        |        |               |       |        |        |                |       |        |        |                         |     |       |       |    |    |    |   |   |   |   |  |
| SGO_0247                                         | -0.232     | 11.349 | 0.0506 | 0.2878 | -1.086     | 11.004 | 0.0005 | 0.0006 | -0.986       | 11.037 | 0.0004 | 0.0007 | -0.854      | 10.354 | 0.0067 | 0.0274 | -0.755        | 9.779 | 0.0088 | 0.0343 | 0.100          | 9.898 | 0.0316 | 0.0559 |                         |     |       |       |    |    |    |   |   |   |   |  |
| pfl; formate acetyltransferase                   |            |        |        |        |            |        |        |        |              |        |        |        |             |        |        |        |               |       |        |        |                |       |        |        |                         |     |       |       |    |    |    |   |   |   |   |  |
| SGO_0252                                         | 0.478      | 5.107  | 0.0169 | 0.0754 | -0.542     | 4.617  | 0.0297 | 0.1218 | -0.114       | 4.382  | 0.0432 | 0.3739 | -1.020      | 4.417  | 0.0086 | 0.0395 | -0.593        | 3.619 | 0.0510 | 0.3132 | 0.427          | 3.562 | 0.1586 | 0.5274 |                         |     |       |       |    |    |    |   |   |   |   |  |
| possible TetR-type transcriptional regulator     |            |        |        |        |            |        |        |        |              |        |        |        |             |        |        |        |               |       |        |        |                |       |        |        |                         |     |       |       |    |    |    |   |   |   |   |  |
| SGO_0253                                         |            | 5.655  |        |        |            | 5.655  |        |        |              | 5.655  |        |        |             |        |        |        |               |       |        |        |                |       |        |        |                         |     |       |       |    |    |    |   |   |   |   |  |
| hypothetical protein SGO_0253                    |            |        |        |        |            |        |        |        |              |        |        |        |             |        |        |        |               |       |        |        |                |       |        |        |                         |     |       |       |    |    |    |   |   |   |   |  |
| SGO_0254                                         |            | 4.018  |        |        | -0.810     | 4.643  | 0.0299 | 0.1228 |              | 4.018  |        |        |             | 2.622  |        |        |               |       |        |        |                | 2.622 |        |        |                         |     |       |       |    |    |    |   |   |   |   |  |
| helicase, RecD/TraA family                       |            |        |        |        |            |        |        |        |              |        |        |        |             |        |        |        |               |       |        |        |                |       |        |        |                         |     |       |       |    |    |    |   |   |   |   |  |
| SGO_0255                                         | -1.915     | 7.565  | 0.0021 | 0.0053 | -1.618     | 7.630  | 0.0027 | 0.0065 | -2.151       | 7.519  | 0.0013 | 0.0045 | 0.297       | 5.938  | 0.0082 | 0.0371 | -0.236        | 5.062 | 0.0282 | 0.1521 | -0.533         | 5.836 | 0.0073 | 0.0051 |                         |     |       |       |    |    |    |   |   |   |   |  |
| Signal peptidase I                               |            |        |        |        |            |        |        |        |              |        |        |        |             |        |        |        |               |       |        |        |                |       |        |        |                         |     |       |       |    |    |    |   |   |   |   |  |
| SGO_0256                                         | 0.549      | 4.962  | 0.0603 | 0.3566 |            | 4.191  |        |        |              | 4.191  |        |        |             | 3.177  |        |        |               | 2.566 |        |        |                |       |        |        |                         |     |       |       |    |    |    |   |   |   |   |  |
| rnhC; ribonuclease HIII                          |            |        |        |        |            |        |        |        |              |        |        |        |             |        |        |        |               |       |        |        |                |       |        |        |                         |     |       |       |    |    |    |   |   |   |   |  |
| SGO_0258                                         | 1.231      | 3.328  |        |        |            | 1.585  |        |        |              | 1.585  | 3.585  |        |             | 2.302  |        |        |               | 0.355 | 2.880  |        |                | 2.657 |        |        |                         |     |       |       |    |    |    |   |   |   |   |  |
| hypothetical protein SGO_0258                    |            |        |        |        |            |        |        |        |              |        |        |        |             |        |        |        |               |       |        |        |                |       |        |        |                         |     |       |       |    |    |    |   |   |   |   |  |

Show detected proteins only  
 Show all proteins

Filter by category:

Proteins found:  
1179

Dot Plots  
Dot Plots

Test Cutoff

q-Value p-Value

.005

| Signif | Direction | Applies To   |
|--------|-----------|--------------|
| yes    | +         | ratios, bars |
| no     | n/a       | bars         |
| yes    | -         | ratios, bars |
| yes    | +         | p-, q-Values |
| yes    | -         | p-, q-Values |



Summary Table SgFn vs Sg SgPg vs Sg SgPgFn vs Sg SgPg v SgFn SgPgFn v SgFn SgPgFn vs SgPg Coverage

| Protein                                                | SgFn vs Sg |       |        |        | SgPg vs Sg |       |        |        | SgPgFn vs Sg |       |        |        | SgPg v SgFn |       |        |        | SgPgFn v SgFn |       |        |        | SgPgFn vs SgPg |       |        |        | Log <sub>2</sub> Ratios |     |       |       |    |    |    |   |   |   |   |  |
|--------------------------------------------------------|------------|-------|--------|--------|------------|-------|--------|--------|--------------|-------|--------|--------|-------------|-------|--------|--------|---------------|-------|--------|--------|----------------|-------|--------|--------|-------------------------|-----|-------|-------|----|----|----|---|---|---|---|--|
|                                                        | Ratio      | Sum   | q-Val  | p-Val  | Ratio      | Sum   | q-Val  | p-Val  | Ratio        | Sum   | q-Val  | p-Val  | Ratio       | Sum   | q-Val  | p-Val  | Ratio         | Sum   | q-Val  | p-Val  | Ratio          | Sum   | q-Val  | p-Val  | Ratio                   | Sum | q-Val | p-Val | -6 | -4 | -2 | 0 | 2 | 4 | 6 |  |
| SGO_0260                                               | -0.703     | 6.887 | 0.0044 | 0.0135 | -0.106     | 7.135 | 0.0376 | 0.1609 | -1.380       | 6.661 | 0.0004 | 0.0008 | 0.597       | 6.310 | 0.0062 | 0.0249 | -0.677        | 5.083 | 0.0123 | 0.0543 | -1.274         | 6.073 | 0.0045 | 0.0014 |                         |     |       |       |    |    |    |   |   |   |   |  |
| DNA mismatch binding protein MutS2                     |            |       |        |        |            |       |        |        |              |       |        |        |             |       |        |        |               |       |        |        |                |       |        |        |                         |     |       |       |    |    |    |   |   |   |   |  |
| SGO_0261                                               |            | 1.585 |        |        |            | 1.585 |        |        |              | 1.585 |        |        |             |       |        |        |               |       |        |        |                |       |        |        |                         |     |       |       |    |    |    |   |   |   |   |  |
| acetyltransferase, GNAT family                         |            |       |        |        |            |       |        |        |              |       |        |        |             |       |        |        |               |       |        |        |                |       |        |        |                         |     |       |       |    |    |    |   |   |   |   |  |
| SGO_0262                                               | 0.568      | 6.914 | 0.0032 | 0.0094 | 0.829      | 7.073 | 0.0008 | 0.0012 | -0.877       | 6.228 | 0.0006 | 0.0017 | 0.261       | 6.793 | 0.0115 | 0.0553 | -1.445        | 5.499 | 0.0010 | 0.0014 | -1.706         | 6.302 | 0.0019 | 0.0003 |                         |     |       |       |    |    |    |   |   |   |   |  |
| dipeptidase                                            |            |       |        |        |            |       |        |        |              |       |        |        |             |       |        |        |               |       |        |        |                |       |        |        |                         |     |       |       |    |    |    |   |   |   |   |  |
| SGO_0263                                               | 0.095      | 7.290 | 0.0900 | 0.5751 | 0.527      | 7.504 | 0.0012 | 0.0020 | 1.216        | 7.973 | 0.0040 | 0.0199 | 0.431       | 7.051 | 0.0237 | 0.1383 | 1.121         | 6.893 | 0.0087 | 0.0340 | 0.690          | 7.637 | 0.0306 | 0.0536 |                         |     |       |       |    |    |    |   |   |   |   |  |
| trx-1; thioredoxin                                     |            |       |        |        |            |       |        |        |              |       |        |        |             |       |        |        |               |       |        |        |                |       |        |        |                         |     |       |       |    |    |    |   |   |   |   |  |
| SGO_0268                                               |            | 5.055 |        |        | -1.945     | 5.229 | 0.0268 | 0.1082 |              | 5.055 |        |        |             | 1.585 |        |        |               |       |        |        |                | 1.585 |        |        |                         |     |       |       |    |    |    |   |   |   |   |  |
| mechanosensitive transport protein                     |            |       |        |        |            |       |        |        |              |       |        |        |             |       |        |        |               |       |        |        |                |       |        |        |                         |     |       |       |    |    |    |   |   |   |   |  |
| SGO_0269                                               |            | 4.194 |        |        |            | 4.194 |        |        |              | 4.194 |        |        |             |       |        |        |               |       |        |        |                |       |        |        |                         |     |       |       |    |    |    |   |   |   |   |  |
| hypothetical protein SGO_0269                          |            |       |        |        |            |       |        |        |              |       |        |        |             |       |        |        |               |       |        |        |                |       |        |        |                         |     |       |       |    |    |    |   |   |   |   |  |
| SGO_0272                                               | 0.119      | 6.592 | 0.0674 | 0.4081 | -0.248     | 6.402 | 0.0007 | 0.0009 | 0.120        | 6.586 | 0.0310 | 0.2548 | -0.367      | 5.966 | 0.0163 | 0.0892 | 0.001         | 5.530 | 0.1304 | 0.9477 | 0.368          | 5.959 | 0.0212 | 0.0303 |                         |     |       |       |    |    |    |   |   |   |   |  |
| hypothetical protein SGO_0272                          |            |       |        |        |            |       |        |        |              |       |        |        |             |       |        |        |               |       |        |        |                |       |        |        |                         |     |       |       |    |    |    |   |   |   |   |  |
| SGO_0276                                               | 0.718      | 9.428 | 0.0029 | 0.0083 | 0.383      | 9.225 | 0.0017 | 0.0034 | 0.460        | 9.271 | 0.0031 | 0.0143 | -0.334      | 9.070 | 0.0083 | 0.0379 | -0.258        | 8.496 | 0.0206 | 0.1025 | 0.077          | 8.931 | 0.1104 | 0.3263 |                         |     |       |       |    |    |    |   |   |   |   |  |
| gdhA; glutamate dehydrogenase (NADP)                   |            |       |        |        |            |       |        |        |              |       |        |        |             |       |        |        |               |       |        |        |                |       |        |        |                         |     |       |       |    |    |    |   |   |   |   |  |
| SGO_0277                                               | 0.354      | 6.057 | 0.0447 | 0.2509 | -0.412     | 5.671 | 0.0422 | 0.1820 |              | 4.856 |        |        | -0.766      | 5.384 | 0.0153 | 0.0815 |               | 4.110 |        |        |                | 3.945 |        |        |                         |     |       |       |    |    |    |   |   |   |   |  |
| pyrA; Dihydroorotate dehydrogenase                     |            |       |        |        |            |       |        |        |              |       |        |        |             |       |        |        |               |       |        |        |                |       |        |        |                         |     |       |       |    |    |    |   |   |   |   |  |
| SGO_0278                                               | 1.709      | 3.094 |        |        |            | 1.000 |        |        |              | 1.000 |        |        |             | 2.196 |        |        |               | 1.585 |        |        |                |       |        |        |                         |     |       |       |    |    |    |   |   |   |   |  |
| msrA; Peptide methionine sulfoxide reductase msrA/msrB |            |       |        |        |            |       |        |        |              |       |        |        |             |       |        |        |               |       |        |        |                |       |        |        |                         |     |       |       |    |    |    |   |   |   |   |  |
| SGO_0279                                               |            | 3.902 |        |        |            | 3.902 |        |        |              | 3.902 |        |        |             |       |        |        |               |       |        |        |                |       |        |        |                         |     |       |       |    |    |    |   |   |   |   |  |
| lipoprotein, putative                                  |            |       |        |        |            |       |        |        |              |       |        |        |             |       |        |        |               |       |        |        |                |       |        |        |                         |     |       |       |    |    |    |   |   |   |   |  |
| SGO_0280                                               | 0.678      | 7.016 | 0.0256 | 0.1260 | -0.591     | 6.340 | 0.0170 | 0.0629 |              | 5.584 |        |        | -1.269      | 6.326 | 0.0124 | 0.0620 |               | 5.224 |        |        |                | 4.531 |        |        |                         |     |       |       |    |    |    |   |   |   |   |  |
| trzA; ethylammine chlorohydrolase                      |            |       |        |        |            |       |        |        |              |       |        |        |             |       |        |        |               |       |        |        |                |       |        |        |                         |     |       |       |    |    |    |   |   |   |   |  |
| SGO_0282                                               |            | 5.347 |        |        |            | 5.347 |        |        |              | 5.347 |        |        |             |       |        |        |               |       |        |        |                |       |        |        |                         |     |       |       |    |    |    |   |   |   |   |  |
| cell wall polysaccharide biosynthesis protein          |            |       |        |        |            |       |        |        |              |       |        |        |             |       |        |        |               |       |        |        |                |       |        |        |                         |     |       |       |    |    |    |   |   |   |   |  |
| SGO_0284                                               |            | 1.058 |        |        |            | 1.058 |        |        |              | 1.058 |        |        |             |       |        |        |               |       |        |        |                |       |        |        |                         |     |       |       |    |    |    |   |   |   |   |  |
| transcriptional regulator                              |            |       |        |        |            |       |        |        |              |       |        |        |             |       |        |        |               |       |        |        |                |       |        |        |                         |     |       |       |    |    |    |   |   |   |   |  |
| SGO_0286                                               | -1.447     | 5.729 | 0.0117 | 0.0484 |            | 5.487 |        |        | -1.900       | 5.668 | 0.0073 | 0.0419 |             | 2.525 |        |        | -0.453        | 2.705 |        |        |                | 2.072 |        |        |                         |     |       |       |    |    |    |   |   |   |   |  |
| DNA mismatch repair protein MutS, putative             |            |       |        |        |            |       |        |        |              |       |        |        |             |       |        |        |               |       |        |        |                |       |        |        |                         |     |       |       |    |    |    |   |   |   |   |  |
| SGO_0288                                               |            | 3.231 |        |        |            | 3.007 |        |        |              |       |        |        | -1.232      | 3.610 | 0.0111 | 0.0536 |               | 2.107 |        |        |                | 2.494 |        |        |                         |     |       |       |    |    |    |   |   |   |   |  |
| GDSL-like lipase/acylhydrolase                         |            |       |        |        |            |       |        |        |              |       |        |        |             |       |        |        |               |       |        |        |                |       |        |        |                         |     |       |       |    |    |    |   |   |   |   |  |

Show detected proteins only  
 Show all proteins

Proteins found:  
1179

Filter by category:  
ABC Transporter

Dot Plots  
Dot Plots

Test

Cutoff

q-Value

p-Value

.005

| Signif | Direction | Applies To   |
|--------|-----------|--------------|
| yes    | +         | ratios, bars |
| no     | n/a       | bars         |
| yes    | -         | ratios, bars |
| yes    | +         | p-, q-Values |
| yes    | -         | p-, q-Values |

SgFn vs Sg — — SgPg vs Sg  
SgPgFn vs Sg — — SgPg vs SgFn  
SgPgFn vs SgFn — — SgPgFn vs SgPg  
SgPgFn vs SgPg — — SgPgFn vs SgPg

| Protein  | Summary Table                                                                       |        | SgFn vs Sg |        |              |        | SgPg vs Sg   |        |                |        | SgPgFn vs Sg   |        |                         |        | SgPg v SgFn |        |        |        | SgPgFn v SgFn |        |        |        | SgPgFn vs SgPg |        |    |    | Coverage |   |   |   |   |  |  |  |  |  |
|----------|-------------------------------------------------------------------------------------|--------|------------|--------|--------------|--------|--------------|--------|----------------|--------|----------------|--------|-------------------------|--------|-------------|--------|--------|--------|---------------|--------|--------|--------|----------------|--------|----|----|----------|---|---|---|---|--|--|--|--|--|
|          | SgFn vs Sg                                                                          |        | SgPg vs Sg |        | SgPgFn vs Sg |        | SgPg vs SgFn |        | SgPgFn vs SgFn |        | SgPgFn vs SgPg |        | Log <sub>2</sub> Ratios |        |             |        |        |        |               |        |        |        |                |        |    |    |          |   |   |   |   |  |  |  |  |  |
|          | Ratio                                                                               | Sum    | q-Val      | p-Val  | Ratio        | Sum    | q-Val        | p-Val  | Ratio          | Sum    | q-Val          | p-Val  | Ratio                   | Sum    | q-Val       | p-Val  | Ratio  | Sum    | q-Val         | p-Val  | Ratio  | Sum    | q-Val          | p-Val  | -6 | -4 | -2       | 0 | 2 | 4 | 6 |  |  |  |  |  |
| SGO_0290 |                                                                                     | 5.411  |            |        | -1.343       | 5.871  | 0.0144       | 0.0519 | -1.342         | 5.657  | 0.0373         | 0.3152 |                         | 3.486  |             |        |        | 1.857  |               |        | 0.001  | 4.065  | 0.2458         | 0.9518 |    |    |          |   |   |   |   |  |  |  |  |  |
|          | copper -translocating P-type ATPase                                                 |        |            |        |              |        |              |        |                |        |                |        |                         |        |             |        |        |        |               |        |        |        |                |        |    |    |          |   |   |   |   |  |  |  |  |  |
| SGO_0291 | -1.699                                                                              | 7.622  | 0.0005     | 0.0008 | -1.402       | 7.697  | 0.0008       | 0.0011 | -2.286         | 7.507  | 0.0004         | 0.0006 | 0.297                   | 6.175  | 0.0019      | 0.0045 | -0.587 | 5.151  | 0.0046        | 0.0146 | -0.884 | 5.946  | 0.0057         | 0.0032 |    |    |          |   |   |   |   |  |  |  |  |  |
|          | copper-translocating P-type ATPase                                                  |        |            |        |              |        |              |        |                |        |                |        |                         |        |             |        |        |        |               |        |        |        |                |        |    |    |          |   |   |   |   |  |  |  |  |  |
| SGO_0292 | -1.515                                                                              | 8.103  | 0.0001     | 0.0000 | 0.881        | 9.177  | 0.0004       | 0.0005 | 1.040          | 9.282  | 0.0003         | 0.0005 | 2.395                   | 8.289  | 0.0002      | 0.0001 | 2.555  | 7.814  | 0.0003        | 0.0001 | 0.159  | 9.120  | 0.0391         | 0.0774 |    |    |          |   |   |   |   |  |  |  |  |  |
|          | spxB; pyruvate oxidase                                                              |        |            |        |              |        |              |        |                |        |                |        |                         |        |             |        |        |        |               |        |        |        |                |        |    |    |          |   |   |   |   |  |  |  |  |  |
| SGO_0294 |                                                                                     | 4.271  |            |        |              | 4.271  |              |        |                | 4.271  |                |        |                         |        |             |        |        |        |               |        |        |        |                |        |    |    |          |   |   |   |   |  |  |  |  |  |
|          | ABC transporter, putative                                                           |        |            |        |              |        |              |        |                |        |                |        |                         |        |             |        |        |        |               |        |        |        |                |        |    |    |          |   |   |   |   |  |  |  |  |  |
| SGO_0297 | 2.180                                                                               | 5.828  | 0.0348     | 0.1852 |              | 2.459  |              |        |                | 2.459  |                |        |                         | 5.168  |             |        |        |        |               |        |        |        |                |        |    |    |          |   |   |   |   |  |  |  |  |  |
|          | 6-phospho-beta-glucosidase                                                          |        |            |        |              |        |              |        |                |        |                |        |                         |        |             |        |        |        |               |        |        |        |                |        |    |    |          |   |   |   |   |  |  |  |  |  |
| SGO_0299 |                                                                                     | 0.585  |            |        |              | 0.585  |              |        |                | 0.585  |                |        |                         |        |             |        |        |        |               |        |        |        |                |        |    |    |          |   |   |   |   |  |  |  |  |  |
|          | putative histidine kinase                                                           |        |            |        |              |        |              |        |                |        |                |        |                         |        |             |        |        |        |               |        |        |        |                |        |    |    |          |   |   |   |   |  |  |  |  |  |
| SGO_0301 |                                                                                     |        |            |        |              |        |              |        |                | 1.981  |                |        |                         |        |             |        |        |        |               |        |        |        |                |        |    |    |          |   |   |   |   |  |  |  |  |  |
|          | ABC transporter ATP-binding protein-like protein                                    |        |            |        |              |        |              |        |                |        |                |        |                         |        |             |        |        |        |               |        |        |        |                |        |    |    |          |   |   |   |   |  |  |  |  |  |
| SGO_0306 |                                                                                     | 3.886  |            |        |              | 3.886  |              |        |                | 3.886  |                |        |                         |        |             |        |        |        |               |        |        |        |                |        |    |    |          |   |   |   |   |  |  |  |  |  |
|          | ABC transporter ATP-binding protein-like protein                                    |        |            |        |              |        |              |        |                |        |                |        |                         |        |             |        |        |        |               |        |        |        |                |        |    |    |          |   |   |   |   |  |  |  |  |  |
| SGO_0307 |                                                                                     | 2.718  |            |        |              | 2.718  |              |        |                | 2.718  |                |        |                         |        |             |        |        |        |               |        |        |        |                |        |    |    |          |   |   |   |   |  |  |  |  |  |
|          | pabB; chorismate binding enzyme                                                     |        |            |        |              |        |              |        |                |        |                |        |                         |        |             |        |        |        |               |        |        |        |                |        |    |    |          |   |   |   |   |  |  |  |  |  |
| SGO_0310 | 2.302                                                                               | 4.772  | 0.0011     | 0.0022 | 1.387        | 3.401  | 0.0144       | 0.0522 |                | 2.202  |                |        | -0.916                  | 4.329  | 0.0290      | 0.1782 |        |        |               |        |        |        |                |        |    |    |          |   |   |   |   |  |  |  |  |  |
|          | metE; 5-methyltetrahydropteroyltrimethylglutamate--homocysteine S-methyltransferase |        |            |        |              |        |              |        |                |        |                |        |                         |        |             |        |        |        |               |        |        |        |                |        |    |    |          |   |   |   |   |  |  |  |  |  |
| SGO_0312 | 1.214                                                                               | 11.377 | 0.0002     | 0.0002 | 0.735        | 11.059 | 0.0001       | 0.0000 | 0.992          | 11.225 | 0.0001         | 0.0000 | -0.479                  | 11.127 | 0.0008      | 0.0013 | -0.222 | 10.630 | 0.0039        | 0.0115 | 0.258  | 11.002 | 0.0042         | 0.0012 |    |    |          |   |   |   |   |  |  |  |  |  |
|          | xfp; D-xylulose 5-phosphate/D-fructose 6-phosphate phosphoketolase                  |        |            |        |              |        |              |        |                |        |                |        |                         |        |             |        |        |        |               |        |        |        |                |        |    |    |          |   |   |   |   |  |  |  |  |  |
| SGO_0317 |                                                                                     | 8.639  |            |        |              | 8.639  |              |        | -5.050         | 8.661  | 0.0082         | 0.0481 |                         |        |             |        |        |        |               |        |        |        |                |        |    |    |          |   |   |   |   |  |  |  |  |  |
|          | LPXTG cell wall surface protein, serine protease, subtilase family                  |        |            |        |              |        |              |        |                |        |                |        |                         |        |             |        |        |        |               |        |        |        |                |        |    |    |          |   |   |   |   |  |  |  |  |  |
| SGO_0321 | 1.577                                                                               | 7.033  | 0.0012     | 0.0024 | 0.887        | 6.560  | 0.0098       | 0.0322 | 0.594          | 6.384  | 0.0162         | 0.1194 | -0.690                  | 6.785  | 0.0021      | 0.0052 | -0.983 | 6.071  | 0.0015        | 0.0030 | -0.292 | 6.267  | 0.0650         | 0.1584 |    |    |          |   |   |   |   |  |  |  |  |  |
|          | polypeptide deformylase                                                             |        |            |        |              |        |              |        |                |        |                |        |                         |        |             |        |        |        |               |        |        |        |                |        |    |    |          |   |   |   |   |  |  |  |  |  |
| SGO_0323 |                                                                                     | 1.000  |            |        | 0.576        | 2.317  |              |        |                | 1.000  |                |        |                         | 1.063  |             |        |        |        |               |        |        |        |                |        |    |    |          |   |   |   |   |  |  |  |  |  |
|          | pseudouridine synthase rRNA-specific                                                |        |            |        |              |        |              |        |                |        |                |        |                         |        |             |        |        |        |               |        |        |        |                |        |    |    |          |   |   |   |   |  |  |  |  |  |
| SGO_0324 |                                                                                     | 5.618  |            |        |              | 5.618  |              |        |                | 5.618  |                |        |                         |        |             |        |        |        |               |        |        |        |                |        |    |    |          |   |   |   |   |  |  |  |  |  |
|          | hypothetical protein SGO_0324                                                       |        |            |        |              |        |              |        |                |        |                |        |                         |        |             |        |        |        |               |        |        |        |                |        |    |    |          |   |   |   |   |  |  |  |  |  |
| SGO_0325 |                                                                                     | 3.058  |            |        |              | 3.058  |              |        |                | 3.058  |                |        |                         |        |             |        |        |        |               |        |        |        |                |        |    |    |          |   |   |   |   |  |  |  |  |  |
|          | probable membrane protein, putative                                                 |        |            |        |              |        |              |        |                |        |                |        |                         |        |             |        |        |        |               |        |        |        |                |        |    |    |          |   |   |   |   |  |  |  |  |  |

Show detected proteins only  
 Show all proteins

Proteins found:  
1179

Dot Plots  
 Dot Plots

Test

Cutoff

q-Value

p-Value

.005

| Signif | Direction | Applies To   |
|--------|-----------|--------------|
| yes    | +         | ratios, bars |
| no     | n/a       | bars         |
| yes    | -         | ratios, bars |
| yes    | +         | p-, q-Values |
| yes    | -         | p-, q-Values |

SgFn vs Sg — — SgPg vs Sg  
SgPgFn vs Sg — — SgPg vs SgFn  
SgPgFn vs SgFn — — SgPgFn vs SgPg

Summary Table SgFn vs Sg SgPg vs Sg SgPgFn vs Sg SgPg v SgFn SgPgFn v SgFn SgPgFn vs SgPg Coverage

| Protein                                            | SgFn vs Sg |       |        |        | SgPg vs Sg |       |        |        | SgPgFn vs Sg |       |        |        | SgPg v SgFn |       |        |        | SgPgFn v SgFn |       |        |        | SgPgFn vs SgPg |       |        |        | Log <sub>2</sub> Ratios |     |       |       |    |    |    |   |   |   |   |  |  |  |
|----------------------------------------------------|------------|-------|--------|--------|------------|-------|--------|--------|--------------|-------|--------|--------|-------------|-------|--------|--------|---------------|-------|--------|--------|----------------|-------|--------|--------|-------------------------|-----|-------|-------|----|----|----|---|---|---|---|--|--|--|
|                                                    | Ratio      | Sum   | q-Val  | p-Val  | Ratio      | Sum   | q-Val  | p-Val  | Ratio        | Sum   | q-Val  | p-Val  | Ratio       | Sum   | q-Val  | p-Val  | Ratio         | Sum   | q-Val  | p-Val  | Ratio          | Sum   | q-Val  | p-Val  | Ratio                   | Sum | q-Val | p-Val | -6 | -4 | -2 | 0 | 2 | 4 | 6 |  |  |  |
| SGO_0326                                           |            | 6.681 |        |        | -3.296     | 6.752 | 0.0097 | 0.0317 |              | 6.681 |        |        |             | 1.871 |        |        |               |       |        |        |                | 1.871 |        |        |                         |     |       |       |    |    |    |   |   |   |   |  |  |  |
| probable membrane protein, putative                |            |       |        |        |            |       |        |        |              |       |        |        |             |       |        |        |               |       |        |        |                |       |        |        |                         |     |       |       |    |    |    |   |   |   |   |  |  |  |
| SGO_0327                                           | 0.798      | 3.924 | 0.0200 | 0.0913 | -0.856     | 3.376 | 0.0346 | 0.1462 |              | 3.025 |        |        | -1.654      | 2.700 |        |        |               | 1.692 |        |        |                | 0.648 |        |        |                         |     |       |       |    |    |    |   |   |   |   |  |  |  |
| Lipopolysaccharide N-acetylglucosaminyltransferase |            |       |        |        |            |       |        |        |              |       |        |        |             |       |        |        |               |       |        |        |                |       |        |        |                         |     |       |       |    |    |    |   |   |   |   |  |  |  |
| SGO_0328                                           |            | 4.383 |        |        |            | 4.383 |        |        |              | 4.383 |        |        |             |       |        |        |               |       |        |        |                |       |        |        |                         |     |       |       |    |    |    |   |   |   |   |  |  |  |
| transmembrane protein, putative                    |            |       |        |        |            |       |        |        |              |       |        |        |             |       |        |        |               |       |        |        |                |       |        |        |                         |     |       |       |    |    |    |   |   |   |   |  |  |  |
| SGO_0329                                           |            | 6.839 |        |        | -4.732     | 6.866 | 0.0187 | 0.0718 |              | 6.839 |        |        |             | 0.585 |        |        |               |       |        |        |                | 0.585 |        |        |                         |     |       |       |    |    |    |   |   |   |   |  |  |  |
| hypothetical protein SGO_0329                      |            |       |        |        |            |       |        |        |              |       |        |        |             |       |        |        |               |       |        |        |                |       |        |        |                         |     |       |       |    |    |    |   |   |   |   |  |  |  |
| SGO_0330                                           |            | 5.031 |        |        |            | 5.031 |        |        |              | 5.031 |        |        |             |       |        |        |               |       |        |        |                |       |        |        |                         |     |       |       |    |    |    |   |   |   |   |  |  |  |
| hypothetical protein SGO_0330                      |            |       |        |        |            |       |        |        |              |       |        |        |             |       |        |        |               |       |        |        |                |       |        |        |                         |     |       |       |    |    |    |   |   |   |   |  |  |  |
| SGO_0331                                           |            | 5.455 |        |        |            | 5.455 |        |        |              | 5.455 |        |        |             |       |        |        |               |       |        |        |                |       |        |        |                         |     |       |       |    |    |    |   |   |   |   |  |  |  |
| hypothetical protein SGO_0331                      |            |       |        |        |            |       |        |        |              |       |        |        |             |       |        |        |               |       |        |        |                |       |        |        |                         |     |       |       |    |    |    |   |   |   |   |  |  |  |
| SGO_0332                                           |            | 5.722 |        |        |            | 5.722 |        |        |              | 5.722 |        |        |             |       |        |        |               |       |        |        |                |       |        |        |                         |     |       |       |    |    |    |   |   |   |   |  |  |  |
| hypothetical protein SGO_0332                      |            |       |        |        |            |       |        |        |              |       |        |        |             |       |        |        |               |       |        |        |                |       |        |        |                         |     |       |       |    |    |    |   |   |   |   |  |  |  |
| SGO_0333                                           | -0.323     | 8.323 | 0.0334 | 0.1757 | -0.089     | 8.419 | 0.0644 | 0.2989 | 0.039        | 8.488 | 0.0801 | 0.7503 | 0.234       | 7.759 | 0.0419 | 0.2768 | 0.362         | 7.225 | 0.0310 | 0.1718 | 0.128          | 7.930 | 0.1089 | 0.3178 |                         |     |       |       |    |    |    |   |   |   |   |  |  |  |
| rpsO; ribosomal protein S15                        |            |       |        |        |            |       |        |        |              |       |        |        |             |       |        |        |               |       |        |        |                |       |        |        |                         |     |       |       |    |    |    |   |   |   |   |  |  |  |
| SGO_0337                                           |            | 1.000 |        |        | 2.161      | 3.452 |        |        |              | 1.000 |        |        |             | 2.648 |        |        |               |       |        |        |                | 2.648 |        |        |                         |     |       |       |    |    |    |   |   |   |   |  |  |  |
| trx-2; thioredoxin                                 |            |       |        |        |            |       |        |        |              |       |        |        |             |       |        |        |               |       |        |        |                |       |        |        |                         |     |       |       |    |    |    |   |   |   |   |  |  |  |
| SGO_0339                                           | 3.050      | 5.724 | 0.0138 | 0.0594 | -0.424     | 2.389 |        |        |              | 1.585 |        |        | -3.474      | 5.190 | 0.0118 | 0.0574 |               | 4.516 |        |        |                | 0.648 |        |        |                         |     |       |       |    |    |    |   |   |   |   |  |  |  |
| hypothetical protein SGO_0339                      |            |       |        |        |            |       |        |        |              |       |        |        |             |       |        |        |               |       |        |        |                |       |        |        |                         |     |       |       |    |    |    |   |   |   |   |  |  |  |
| SGO_0342                                           | 1.201      | 8.387 | 0.0004 | 0.0004 | 0.572      | 7.982 | 0.0036 | 0.0093 | 0.291        | 7.819 | 0.0031 | 0.0143 | -0.629      | 8.075 | 0.0021 | 0.0050 | -0.909        | 7.359 | 0.0009 | 0.0010 | -0.280         | 7.594 | 0.0330 | 0.0606 |                         |     |       |       |    |    |    |   |   |   |   |  |  |  |
| pepF-2; oligoendopeptidase                         |            |       |        |        |            |       |        |        |              |       |        |        |             |       |        |        |               |       |        |        |                |       |        |        |                         |     |       |       |    |    |    |   |   |   |   |  |  |  |
| SGO_0344                                           | 0.219      | 9.215 | 0.0124 | 0.0516 | -0.124     | 9.039 | 0.0049 | 0.0139 | -0.094       | 9.053 | 0.0059 | 0.0326 | -0.343      | 8.646 | 0.0046 | 0.0170 | -0.313        | 8.048 | 0.0061 | 0.0214 | 0.030          | 8.477 | 0.0735 | 0.1898 |                         |     |       |       |    |    |    |   |   |   |   |  |  |  |
| pnpA; polyribonucleotide nucleotidyltransferase    |            |       |        |        |            |       |        |        |              |       |        |        |             |       |        |        |               |       |        |        |                |       |        |        |                         |     |       |       |    |    |    |   |   |   |   |  |  |  |
| SGO_0345                                           |            | 3.663 |        |        |            | 3.663 |        |        |              | 3.663 |        |        |             |       |        |        |               |       |        |        |                |       |        |        |                         |     |       |       |    |    |    |   |   |   |   |  |  |  |
| cysE; serine O-acetyltransferase                   |            |       |        |        |            |       |        |        |              |       |        |        |             |       |        |        |               |       |        |        |                |       |        |        |                         |     |       |       |    |    |    |   |   |   |   |  |  |  |
| SGO_0348                                           | -0.407     | 4.511 |        |        | -1.348     | 4.537 | 0.0036 | 0.0090 |              | 3.700 |        |        | -0.942      | 3.810 | 0.0043 | 0.0151 |               | 2.170 |        |        |                | 2.839 |        |        |                         |     |       |       |    |    |    |   |   |   |   |  |  |  |
| reductase                                          |            |       |        |        |            |       |        |        |              |       |        |        |             |       |        |        |               |       |        |        |                |       |        |        |                         |     |       |       |    |    |    |   |   |   |   |  |  |  |
| SGO_0349                                           | 0.798      | 7.081 | 0.0084 | 0.0315 | 0.002      | 6.611 | 0.1832 | 0.9875 | 0.188        | 6.710 | 0.0171 | 0.1270 | -0.796      | 6.568 | 0.0072 | 0.0301 | -0.611        | 6.029 | 0.0125 | 0.0552 | 0.186          | 6.196 | 0.0419 | 0.0871 |                         |     |       |       |    |    |    |   |   |   |   |  |  |  |
| cysS; cysteinyl-tRNA synthetase                    |            |       |        |        |            |       |        |        |              |       |        |        |             |       |        |        |               |       |        |        |                |       |        |        |                         |     |       |       |    |    |    |   |   |   |   |  |  |  |
| SGO_0352                                           | -0.349     | 7.992 | 0.0015 | 0.0032 | -0.745     | 7.834 | 0.0012 | 0.0022 | -0.788       | 7.816 | 0.0003 | 0.0003 | -0.396      | 7.112 | 0.0042 | 0.0144 | -0.438        | 6.480 | 0.0007 | 0.0007 | -0.043         | 6.880 | 0.1733 | 0.6020 |                         |     |       |       |    |    |    |   |   |   |   |  |  |  |
| ABC transporter, ATP-binding protein SP1580        |            |       |        |        |            |       |        |        |              |       |        |        |             |       |        |        |               |       |        |        |                |       |        |        |                         |     |       |       |    |    |    |   |   |   |   |  |  |  |

Show detected proteins only  
 Show all proteins

Proteins found:  
1179

Dot Plots  
Dot Plots

Test

Cutoff

q-Value

p-Value

.005

| Signif | Direction | Applies To   |
|--------|-----------|--------------|
| yes    | +         | ratios, bars |
| no     | n/a       | bars         |
| yes    | -         | ratios, bars |
| yes    | +         | p-, q-Values |
| yes    | -         | p-, q-Values |

SgFn vs Sg —  
SgPgFn vs Sg —  
SgPgFn vs SgFn —  
SgPg vs Sg —  
SgPg vs SgFn —  
-SgPgFn vs SgPg

Summary Table SgFn vs Sg SgPg vs Sg SgPgFn vs Sg SgPg v SgFn SgPgFn v SgFn SgPgFn vs SgPg Coverage

| Protein                                                         | SgFn vs Sg |       |        |        | SgPg vs Sg |       |        |        | SgPgFn vs Sg |       |        |        | SgPg v SgFn |       |        |        | SgPgFn v SgFn |       |        |        | SgPgFn vs SgPg |       |        |        | Log <sub>2</sub> Ratios |     |       |       |    |    |    |   |   |   |   |  |
|-----------------------------------------------------------------|------------|-------|--------|--------|------------|-------|--------|--------|--------------|-------|--------|--------|-------------|-------|--------|--------|---------------|-------|--------|--------|----------------|-------|--------|--------|-------------------------|-----|-------|-------|----|----|----|---|---|---|---|--|
|                                                                 | Ratio      | Sum   | q-Val  | p-Val  | Ratio      | Sum   | q-Val  | p-Val  | Ratio        | Sum   | q-Val  | p-Val  | Ratio       | Sum   | q-Val  | p-Val  | Ratio         | Sum   | q-Val  | p-Val  | Ratio          | Sum   | q-Val  | p-Val  | Ratio                   | Sum | q-Val | p-Val | -6 | -4 | -2 | 0 | 2 | 4 | 6 |  |
| <b>SGO_0353</b><br>transport protein                            | 1.406      | 4.544 | 0.0136 | 0.0580 | 0.905      | 4.160 | 0.0171 | 0.0639 |              | 2.619 |        |        | -0.501      | 4.341 | 0.0414 | 0.2728 |               | 2.979 |        |        |                | 3.040 |        |        |                         |     |       |       |    |    |    |   |   |   |   |  |
| <b>SGO_0355</b><br>RNA methyltransferase, TrmH family, group 3  | 0.730      | 5.564 | 0.0047 | 0.0149 | 0.966      | 5.720 | 0.0046 | 0.0127 |              | 4.154 |        |        | 0.236       | 5.496 | 0.0349 | 0.2222 |               | 3.759 |        |        |                | 4.612 |        |        |                         |     |       |       |    |    |    |   |   |   |   |  |
| <b>SGO_0356</b><br>hypothetical protein SGO_0356                |            | 1.379 |        |        |            | 1.380 |        |        |              | 1.380 |        |        |             |       |        |        |               |       |        |        |                |       |        |        |                         |     |       |       |    |    |    |   |   |   |   |  |
| <b>SGO_0357</b><br>degV; DegV family fatty acid binding protein | 1.098      | 7.238 | 0.0022 | 0.0058 | 1.449      | 7.485 | 0.0013 | 0.0025 | 1.313        | 7.388 | 0.0012 | 0.0041 | 0.351       | 7.343 | 0.0025 | 0.0070 | 0.214         | 6.658 | 0.0091 | 0.0360 | -0.137         | 7.442 | 0.0627 | 0.1523 |                         |     |       |       |    |    |    |   |   |   |   |  |
| <b>SGO_0358</b><br>rpmI; ribosomal protein L13                  | 0.443      | 9.550 | 0.0112 | 0.0451 | 0.122      | 9.371 | 0.0784 | 0.3765 | 0.343        | 9.490 | 0.0083 | 0.0498 | -0.321      | 9.085 | 0.0082 | 0.0369 | -0.100        | 8.576 | 0.0520 | 0.3226 | 0.221          | 9.027 | 0.0116 | 0.0115 |                         |     |       |       |    |    |    |   |   |   |   |  |
| <b>SGO_0359</b><br>rpsI; ribosomal protein S9                   | -0.649     | 8.262 | 0.0156 | 0.0689 | -0.466     | 8.319 | 0.0137 | 0.0485 | 0.022        | 8.546 | 0.0981 | 0.9422 | 0.184       | 7.477 | 0.0730 | 0.5246 | 0.671         | 7.145 | 0.0101 | 0.0418 | 0.488          | 7.813 | 0.0120 | 0.0122 |                         |     |       |       |    |    |    |   |   |   |   |  |
| <b>SGO_0361</b><br>immunity repressor protein                   | 0.296      | 4.951 | 0.0570 | 0.3323 | -0.553     | 4.546 | 0.0329 | 0.1384 |              | 3.789 |        |        | -0.849      | 4.222 | 0.0132 | 0.0679 |               | 2.972 |        |        |                | 2.740 |        |        |                         |     |       |       |    |    |    |   |   |   |   |  |
| <b>SGO_0368</b><br>merA; mercury(II) reductase                  | 1.733      | 4.471 | 0.0048 | 0.0150 |            | 2.345 |        |        | 1.075        | 3.371 | 0.0148 | 0.1064 |             | 3.583 |        |        | -0.659        | 3.359 | 0.0554 | 0.3497 |                | 1.883 |        |        |                         |     |       |       |    |    |    |   |   |   |   |  |
| <b>SGO_0371</b><br>putative transcriptional regulator           |            | 2.000 |        |        |            | 2.000 |        |        |              | 2.000 |        |        |             |       |        |        |               |       |        |        |                |       |        |        |                         |     |       |       |    |    |    |   |   |   |   |  |
| <b>SGO_0372</b><br>malate oxidoreductase                        | 1.711      | 6.450 | 0.0017 | 0.0040 | 1.166      | 6.049 | 0.0026 | 0.0062 | 0.792        | 5.806 | 0.0059 | 0.0319 | -0.545      | 6.289 | 0.0048 | 0.0177 | -0.919        | 5.539 | 0.0025 | 0.0064 | -0.374         | 5.811 | 0.0055 | 0.0029 |                         |     |       |       |    |    |    |   |   |   |   |  |
| <b>SGO_0374</b><br>Response regulator of the LytR/AlgR family   | 0.739      | 6.858 | 0.0028 | 0.0079 | -0.169     | 6.358 | 0.0363 | 0.1547 | -1.123       | 6.002 | 0.0022 | 0.0094 | -0.908      | 6.283 | 0.0019 | 0.0047 | -1.862        | 5.419 | 0.0013 | 0.0022 | -0.954         | 5.376 | 0.0145 | 0.0161 |                         |     |       |       |    |    |    |   |   |   |   |  |
| <b>SGO_0376</b><br>ABC transporter ATP-binding protein          |            | 3.322 |        |        |            | 3.322 |        |        | -0.926       | 3.932 |        |        |             |       |        |        |               | 1.272 |        |        |                | 1.883 |        |        |                         |     |       |       |    |    |    |   |   |   |   |  |
| <b>SGO_0378</b><br>hypothetical protein SGO_0378                |            | 4.294 |        |        |            |       |        |        |              | 3.781 |        |        |             |       |        |        |               | 3.170 |        |        |                |       |        |        |                         |     |       |       |    |    |    |   |   |   |   |  |
| <b>SGO_0379</b><br>Protein of unknown function (DUF421) family  |            | 4.594 |        |        |            | 4.594 |        |        |              | 4.594 |        |        |             |       |        |        |               |       |        |        |                |       |        |        |                         |     |       |       |    |    |    |   |   |   |   |  |
| <b>SGO_0380</b><br>hypothetical protein SGO_0380                |            | 3.459 |        |        |            | 3.459 |        |        |              | 3.459 |        |        |             |       |        |        |               |       |        |        |                |       |        |        |                         |     |       |       |    |    |    |   |   |   |   |  |
| <b>SGO_0384</b><br>putative carboxylate-amine/thiol ligase      | -0.291     | 5.820 | 0.0649 | 0.3905 | -0.385     | 5.773 | 0.0578 | 0.2637 | -0.243       | 5.827 | 0.0418 | 0.3577 | -0.094      | 5.081 | 0.0912 | 0.6706 | 0.048         | 4.532 | 0.1293 | 0.9361 | 0.142          | 5.090 | 0.1416 | 0.4514 |                         |     |       |       |    |    |    |   |   |   |   |  |

Show detected proteins only  
 Show all proteins

Proteins found:  
1179

Filter by category:  
ABC Transporter

Dot Plots  
Dot Plots

Test

Cutoff

q-Value

.005

p-Value

| Signif | Direction | Applies To   |
|--------|-----------|--------------|
| yes    | +         | ratios, bars |
| no     | n/a       | bars         |
| yes    | -         | ratios, bars |
| yes    | +         | p-, q-Values |
| yes    | -         | p-, q-Values |

SgFn vs Sg — — SgPg vs Sg  
SgPgFn vs Sg — — SgPg vs SgFn  
SgPgFn vs SgFn — — SgPgFn vs SgPg

Summary Table SgFn vs Sg SgPg vs Sg SgPgFn vs Sg SgPg v SgFn SgPgFn v SgFn SgPgFn vs SgPg Coverage

| Protein                                                       | SgFn vs Sg |        |        |        | SgPg vs Sg |        |        |        | SgPgFn vs Sg |        |        |        | SgPg v SgFn |        |        |        | SgPgFn v SgFn |        |        |        | SgPgFn vs SgPg |        |        |        | Log <sub>2</sub> Ratios |     |       |       |    |    |    |   |   |   |   |  |
|---------------------------------------------------------------|------------|--------|--------|--------|------------|--------|--------|--------|--------------|--------|--------|--------|-------------|--------|--------|--------|---------------|--------|--------|--------|----------------|--------|--------|--------|-------------------------|-----|-------|-------|----|----|----|---|---|---|---|--|
|                                                               | Ratio      | Sum    | q-Val  | p-Val  | Ratio      | Sum    | q-Val  | p-Val  | Ratio        | Sum    | q-Val  | p-Val  | Ratio       | Sum    | q-Val  | p-Val  | Ratio         | Sum    | q-Val  | p-Val  | Ratio          | Sum    | q-Val  | p-Val  | Ratio                   | Sum | q-Val | p-Val | -6 | -4 | -2 | 0 | 2 | 4 | 6 |  |
| SGO_0385                                                      | 0.670      | 7.728  | 0.0026 | 0.0070 |            | 6.351  |        |        |              | 6.351  |        |        |             | 6.514  |        |        |               | 5.903  |        |        |                |        |        |        |                         |     |       |       |    |    |    |   |   |   |   |  |
| exo-beta-D-fructosidase                                       |            |        |        |        |            |        |        |        |              |        |        |        |             |        |        |        |               |        |        |        |                |        |        |        |                         |     |       |       |    |    |    |   |   |   |   |  |
| SGO_0387                                                      |            | 4.194  |        |        |            | 4.194  |        |        |              | 4.194  |        |        |             |        |        |        |               |        |        |        |                |        |        |        |                         |     |       |       |    |    |    |   |   |   |   |  |
| hypothetical protein SGO_0387                                 |            |        |        |        |            |        |        |        |              |        |        |        |             |        |        |        |               |        |        |        |                |        |        |        |                         |     |       |       |    |    |    |   |   |   |   |  |
| SGO_0388                                                      | 0.224      | 7.351  | 0.0555 | 0.3217 |            | 6.251  |        |        |              | 6.251  |        |        |             | 5.931  |        |        |               | 5.320  |        |        |                |        |        |        |                         |     |       |       |    |    |    |   |   |   |   |  |
| LPXTG cell wall surface protein, zinc carboxypeptidase family |            |        |        |        |            |        |        |        |              |        |        |        |             |        |        |        |               |        |        |        |                |        |        |        |                         |     |       |       |    |    |    |   |   |   |   |  |
| SGO_0389                                                      | 3.458      | 5.613  | 0.0418 | 0.2326 |            | 1.000  |        |        |              | 1.000  |        |        |             | 5.039  |        |        |               | 4.429  |        |        |                |        |        |        |                         |     |       |       |    |    |    |   |   |   |   |  |
| possible phosphoserine phosphatase                            |            |        |        |        |            |        |        |        |              |        |        |        |             |        |        |        |               |        |        |        |                |        |        |        |                         |     |       |       |    |    |    |   |   |   |   |  |
| SGO_0390                                                      | 1.938      | 8.321  | 0.0014 | 0.0028 | 1.564      | 8.027  | 0.0010 | 0.0015 | 1.196        | 7.757  | 0.0003 | 0.0005 | -0.374      | 8.298  | 0.0161 | 0.0876 | -0.742        | 7.537  | 0.0050 | 0.0165 | -0.369         | 7.920  | 0.0236 | 0.0363 |                         |     |       |       |    |    |    |   |   |   |   |  |
| glycerol-3-phosphate dehydrogenase (NAD(P)+)                  |            |        |        |        |            |        |        |        |              |        |        |        |             |        |        |        |               |        |        |        |                |        |        |        |                         |     |       |       |    |    |    |   |   |   |   |  |
| SGO_0392                                                      | 3.821      | 6.458  | 0.0090 | 0.0344 | 2.875      | 5.566  | 0.0232 | 0.0922 | 2.271        | 4.127  |        |        | -0.946      | 6.501  | 0.0011 | 0.0021 | -1.550        | 5.511  | 0.0113 | 0.0485 | -0.604         | 5.365  | 0.0830 | 0.2216 |                         |     |       |       |    |    |    |   |   |   |   |  |
| phosphoglycerate mutase                                       |            |        |        |        |            |        |        |        |              |        |        |        |             |        |        |        |               |        |        |        |                |        |        |        |                         |     |       |       |    |    |    |   |   |   |   |  |
| SGO_0393                                                      | -0.858     | 5.430  | 0.0702 | 0.4299 |            | 5.105  |        |        |              | 5.105  |        |        |             | 2.611  |        |        |               | 2.000  |        |        |                |        |        |        |                         |     |       |       |    |    |    |   |   |   |   |  |
| D-alanyl-D-alanine carboxypeptidase                           |            |        |        |        |            |        |        |        |              |        |        |        |             |        |        |        |               |        |        |        |                |        |        |        |                         |     |       |       |    |    |    |   |   |   |   |  |
| SGO_0396                                                      |            | 2.322  |        |        |            | 2.322  |        |        |              | 2.322  |        |        |             |        |        |        |               |        |        |        |                |        |        |        |                         |     |       |       |    |    |    |   |   |   |   |  |
| Transcriptional regulator, PadR family                        |            |        |        |        |            |        |        |        |              |        |        |        |             |        |        |        |               |        |        |        |                |        |        |        |                         |     |       |       |    |    |    |   |   |   |   |  |
| SGO_0398                                                      | -1.902     | 7.059  | 0.0021 | 0.0053 | -2.695     | 6.928  | 0.0017 | 0.0033 | -2.749       | 6.912  | 0.0009 | 0.0028 | -0.794      | 4.991  | 0.0183 | 0.1028 | -0.848        | 4.338  | 0.0119 | 0.0517 | -0.054         | 4.508  | 0.2021 | 0.7300 |                         |     |       |       |    |    |    |   |   |   |   |  |
| ABC transporter ATP-binding protein                           |            |        |        |        |            |        |        |        |              |        |        |        |             |        |        |        |               |        |        |        |                |        |        |        |                         |     |       |       |    |    |    |   |   |   |   |  |
| SGO_0400                                                      | 0.608      | 4.887  | 0.0421 | 0.2346 |            | 3.423  |        |        |              | 3.423  |        |        |             | 3.724  |        |        |               | 3.113  |        |        |                |        |        |        |                         |     |       |       |    |    |    |   |   |   |   |  |
| hrcA; heat-inducible transcription repressor HrcA             |            |        |        |        |            |        |        |        |              |        |        |        |             |        |        |        |               |        |        |        |                |        |        |        |                         |     |       |       |    |    |    |   |   |   |   |  |
| SGO_0401                                                      | 0.727      | 7.007  | 0.0294 | 0.1511 | 0.166      | 6.709  | 0.1742 | 0.9248 | 0.875        | 7.096  | 0.0122 | 0.0835 | -0.561      | 6.510  | 0.0076 | 0.0327 | 0.148         | 6.218  | 0.0233 | 0.1210 | 0.708          | 6.598  | 0.0127 | 0.0135 |                         |     |       |       |    |    |    |   |   |   |   |  |
| grpE; co-chaperone GrpE                                       |            |        |        |        |            |        |        |        |              |        |        |        |             |        |        |        |               |        |        |        |                |        |        |        |                         |     |       |       |    |    |    |   |   |   |   |  |
| SGO_0402                                                      | 1.202      | 11.615 | 0.0001 | 0.0001 | 0.461      | 11.142 | 0.0013 | 0.0022 | 0.487        | 11.157 | 0.0007 | 0.0019 | -0.741      | 11.257 | 0.0002 | 0.0001 | -0.715        | 10.656 | 0.0003 | 0.0001 | 0.026          | 10.853 | 0.1603 | 0.5363 |                         |     |       |       |    |    |    |   |   |   |   |  |
| dnaK; DnaK chaperone protein                                  |            |        |        |        |            |        |        |        |              |        |        |        |             |        |        |        |               |        |        |        |                |        |        |        |                         |     |       |       |    |    |    |   |   |   |   |  |
| SGO_0404                                                      | -2.009     | 7.978  | 0.0052 | 0.0171 | -2.045     | 7.970  | 0.0057 | 0.0167 | -2.460       | 7.910  | 0.0032 | 0.0147 | -0.036      | 6.073  | 0.0706 | 0.5026 | -0.451        | 5.300  | 0.0313 | 0.1735 | -0.415         | 5.889  | 0.0769 | 0.2007 |                         |     |       |       |    |    |    |   |   |   |   |  |
| dnaJ; DnaJ chaperone protein                                  |            |        |        |        |            |        |        |        |              |        |        |        |             |        |        |        |               |        |        |        |                |        |        |        |                         |     |       |       |    |    |    |   |   |   |   |  |
| SGO_0407                                                      | 1.455      | 4.510  | 0.0205 | 0.0948 | -0.231     | 2.696  |        |        |              | 1.807  |        |        | -1.686      | 3.963  | 0.0161 | 0.0876 |               | 3.145  |        |        |                | 1.063  |        |        |                         |     |       |       |    |    |    |   |   |   |   |  |
| truA; tRNA pseudouridine synthase A                           |            |        |        |        |            |        |        |        |              |        |        |        |             |        |        |        |               |        |        |        |                |        |        |        |                         |     |       |       |    |    |    |   |   |   |   |  |
| SGO_0408                                                      |            | 8.890  |        |        |            | 8.890  |        |        | -4.983       | 8.913  | 0.0027 | 0.0117 |             |        |        |        |               | 1.783  |        |        |                | 2.394  |        |        |                         |     |       |       |    |    |    |   |   |   |   |  |
| zmpB; zinc metalloproteinase B                                |            |        |        |        |            |        |        |        |              |        |        |        |             |        |        |        |               |        |        |        |                |        |        |        |                         |     |       |       |    |    |    |   |   |   |   |  |
| SGO_0409                                                      | 7.517      | 9.176  | 0.0184 | 0.0834 | 1.598      | 3.467  | 0.0233 | 0.0929 |              | 0.643  |        |        | -5.919      | 8.682  | 0.0007 | 0.0010 |               | 8.048  |        |        |                | 2.735  |        |        |                         |     |       |       |    |    |    |   |   |   |   |  |
| pyridoxine kinase                                             |            |        |        |        |            |        |        |        |              |        |        |        |             |        |        |        |               |        |        |        |                |        |        |        |                         |     |       |       |    |    |    |   |   |   |   |  |

Show detected proteins only  
 Show all proteins

Proteins found:  
1179

Dot Plots  
Dot Plots

Test

Cutoff

q-Value

p-Value

.005

| Signif | Direction | Applies To   |
|--------|-----------|--------------|
| yes    | +         | ratios, bars |
| no     | n/a       | bars         |
| yes    | -         | ratios, bars |
| yes    | +         | p-, q-Values |
| yes    | -         | p-, q-Values |

SgFn vs Sg — — SgPg vs Sg  
SgPgFn vs Sg — — SgPg vs SgFn  
SgPgFn vs SgFn — — SgPgFn vs SgPg

Summary Table SgFn vs Sg SgPg vs Sg SgPgFn vs Sg SgPg v SgFn SgPgFn v SgFn SgPgFn vs SgPg Coverage

| Protein                                                | SgFn vs Sg    |        |        |        | SgPg vs Sg    |        |        |        | SgPgFn vs Sg  |        |        |        | SgPg v SgFn   |        |        |        | SgPgFn v SgFn |        |        |        | SgPgFn vs SgPg |        |        |        | Log <sub>2</sub> Ratios |     |       |       |    |    |    |   |   |   |   |  |  |
|--------------------------------------------------------|---------------|--------|--------|--------|---------------|--------|--------|--------|---------------|--------|--------|--------|---------------|--------|--------|--------|---------------|--------|--------|--------|----------------|--------|--------|--------|-------------------------|-----|-------|-------|----|----|----|---|---|---|---|--|--|
|                                                        | Ratio         | Sum    | q-Val  | p-Val  | Ratio         | Sum    | q-Val  | p-Val  | Ratio         | Sum    | q-Val  | p-Val  | Ratio         | Sum    | q-Val  | p-Val  | Ratio         | Sum    | q-Val  | p-Val  | Ratio          | Sum    | q-Val  | p-Val  | Ratio                   | Sum | q-Val | p-Val | -6 | -4 | -2 | 0 | 2 | 4 | 6 |  |  |
| <b>SGO_0411</b>                                        |               | 8.854  |        |        |               | 4.454  |        |        |               | 3.566  |        |        | -4.261        | 8.407  | 0.0072 | 0.0303 | -4.144        | 7.766  | 0.0451 | 0.2683 | 0.118          | 4.564  | 0.1587 | 0.5290 |                         |     |       |       |    |    |    |   |   |   |   |  |  |
| conserved hypothetical protein TIGR01440               |               |        |        |        |               |        |        |        |               |        |        |        |               |        |        |        |               |        |        |        |                |        |        |        |                         |     |       |       |    |    |    |   |   |   |   |  |  |
| <b>SGO_0412</b>                                        | 0.157         | 10.717 | 0.0298 | 0.1538 | <b>0.831</b>  | 11.109 | 0.0005 | 0.0006 | <b>1.089</b>  | 11.280 | 0.0002 | 0.0002 | <b>0.673</b>  | 10.654 | 0.0006 | 0.0008 | <b>0.932</b>  | 10.208 | 0.0004 | 0.0003 | 0.259          | 11.086 | 0.0051 | 0.0025 |                         |     |       |       |    |    |    |   |   |   |   |  |  |
| tig; trigger factor                                    |               |        |        |        |               |        |        |        |               |        |        |        |               |        |        |        |               |        |        |        |                |        |        |        |                         |     |       |       |    |    |    |   |   |   |   |  |  |
| <b>SGO_0413</b>                                        | <b>2.206</b>  | 7.129  | 0.0003 | 0.0004 | <b>2.022</b>  | 7.008  | 0.0040 | 0.0107 | <b>1.445</b>  | 6.540  | 0.0007 | 0.0018 | -0.184        | 7.251  | 0.0657 | 0.4612 | <b>-0.761</b> | 6.382  | 0.0007 | 0.0007 | -0.577         | 6.900  | 0.0368 | 0.0718 |                         |     |       |       |    |    |    |   |   |   |   |  |  |
| DNA-directed RNA polymerase delta chain                |               |        |        |        |               |        |        |        |               |        |        |        |               |        |        |        |               |        |        |        |                |        |        |        |                         |     |       |       |    |    |    |   |   |   |   |  |  |
| <b>SGO_0415</b>                                        | <b>-1.134</b> | 10.674 | 0.0005 | 0.0007 | <b>-1.044</b> | 10.702 | 0.0005 | 0.0006 | <b>-1.184</b> | 10.658 | 0.0003 | 0.0005 | 0.090         | 9.530  | 0.0349 | 0.2222 | -0.050        | 8.850  | 0.0760 | 0.5089 | -0.140         | 9.505  | 0.0226 | 0.0337 |                         |     |       |       |    |    |    |   |   |   |   |  |  |
| secA; preprotein translocase, SecA subunit             |               |        |        |        |               |        |        |        |               |        |        |        |               |        |        |        |               |        |        |        |                |        |        |        |                         |     |       |       |    |    |    |   |   |   |   |  |  |
| <b>SGO_0416</b>                                        | <b>1.455</b>  | 7.692  | 0.0001 | 0.0001 | 0.754         | 7.228  | 0.0087 | 0.0280 | -0.211        | 6.715  | 0.0597 | 0.5367 | <b>-0.702</b> | 7.428  | 0.0028 | 0.0085 | <b>-1.666</b> | 6.527  | 0.0009 | 0.0010 | -0.964         | 6.657  | 0.0227 | 0.0340 |                         |     |       |       |    |    |    |   |   |   |   |  |  |
| phospho-2-dehydro-3-deoxyheptonate aldolase            |               |        |        |        |               |        |        |        |               |        |        |        |               |        |        |        |               |        |        |        |                |        |        |        |                         |     |       |       |    |    |    |   |   |   |   |  |  |
| <b>SGO_0418</b>                                        |               | 5.266  |        |        |               | 3.870  |        |        |               |        |        |        | <b>-1.405</b> | 5.217  | 0.0004 | 0.0004 |               | 4.142  |        |        |                | 3.357  |        |        |                         |     |       |       |    |    |    |   |   |   |   |  |  |
| alr; alanine racemase                                  |               |        |        |        |               |        |        |        |               |        |        |        |               |        |        |        |               |        |        |        |                |        |        |        |                         |     |       |       |    |    |    |   |   |   |   |  |  |
| <b>SGO_0425</b>                                        | 2.236         | 3.572  |        |        | 1.326         | 2.868  |        |        |               | 1.058  |        |        | -0.910        | 3.396  |        |        |               | 2.170  |        |        |                | 1.871  |        |        |                         |     |       |       |    |    |    |   |   |   |   |  |  |
| ansB; asparaginase                                     |               |        |        |        |               |        |        |        |               |        |        |        |               |        |        |        |               |        |        |        |                |        |        |        |                         |     |       |       |    |    |    |   |   |   |   |  |  |
| <b>SGO_0426</b>                                        | 0.886         | 6.136  | 0.0062 | 0.0214 | -0.316        | 5.480  | 0.0492 | 0.2190 | -0.210        | 5.146  | 0.0650 | 0.5907 | <b>-1.201</b> | 5.513  | 0.0025 | 0.0071 | -1.096        | 4.682  | 0.0291 | 0.1586 | 0.105          | 4.407  | 0.1979 | 0.7048 |                         |     |       |       |    |    |    |   |   |   |   |  |  |
| Cof family protein                                     |               |        |        |        |               |        |        |        |               |        |        |        |               |        |        |        |               |        |        |        |                |        |        |        |                         |     |       |       |    |    |    |   |   |   |   |  |  |
| <b>SGO_0427</b>                                        | <b>3.220</b>  | 7.650  | 0.0005 | 0.0006 | <b>1.411</b>  | 6.151  | 0.0006 | 0.0008 | <b>1.454</b>  | 6.180  | 0.0001 | 0.0001 | <b>-1.809</b> | 7.352  | 0.0008 | 0.0012 | <b>-1.766</b> | 6.750  | 0.0009 | 0.0012 | 0.043          | 6.199  | 0.1767 | 0.6150 |                         |     |       |       |    |    |    |   |   |   |   |  |  |
| universal stress protein family                        |               |        |        |        |               |        |        |        |               |        |        |        |               |        |        |        |               |        |        |        |                |        |        |        |                         |     |       |       |    |    |    |   |   |   |   |  |  |
| <b>SGO_0429</b>                                        | -0.087        | 9.283  | 0.0341 | 0.1809 | -0.208        | 9.238  | 0.0673 | 0.3144 | <b>-0.434</b> | 9.126  | 0.0012 | 0.0042 | -0.121        | 8.678  | 0.0795 | 0.5757 | <b>-0.347</b> | 7.952  | 0.0016 | 0.0034 | -0.226         | 8.510  | 0.0878 | 0.2406 |                         |     |       |       |    |    |    |   |   |   |   |  |  |
| aspartate transaminase                                 |               |        |        |        |               |        |        |        |               |        |        |        |               |        |        |        |               |        |        |        |                |        |        |        |                         |     |       |       |    |    |    |   |   |   |   |  |  |
| <b>SGO_0430</b>                                        | <b>-2.297</b> | 9.650  | 0.0001 | 0.0000 |               | 9.382  |        |        |               | 9.382  |        |        |               | 6.577  |        |        |               | 5.967  |        |        |                |        |        |        |                         |     |       |       |    |    |    |   |   |   |   |  |  |
| LPXTG cell wall surface protein                        |               |        |        |        |               |        |        |        |               |        |        |        |               |        |        |        |               |        |        |        |                |        |        |        |                         |     |       |       |    |    |    |   |   |   |   |  |  |
| <b>SGO_0431</b>                                        | 0.352         | 4.954  | 0.0932 | 0.5974 | 0.147         | 5.310  | 0.1464 | 0.7587 |               | 4.268  |        |        | -0.204        | 4.493  | 0.0326 | 0.2026 |               | 2.429  |        |        |                | 3.837  |        |        |                         |     |       |       |    |    |    |   |   |   |   |  |  |
| GTP-sensing transcriptional pleiotropic repressor codY |               |        |        |        |               |        |        |        |               |        |        |        |               |        |        |        |               |        |        |        |                |        |        |        |                         |     |       |       |    |    |    |   |   |   |   |  |  |
| <b>SGO_0432</b>                                        | -1.338        | 6.161  | 0.0267 | 0.1349 | 0.535         | 7.190  | 0.0066 | 0.0198 | 0.234         | 7.019  | 0.0184 | 0.1401 | 1.873         | 6.100  | 0.0126 | 0.0633 | 1.572         | 5.226  | 0.0121 | 0.0526 | -0.301         | 6.773  | 0.0214 | 0.0309 |                         |     |       |       |    |    |    |   |   |   |   |  |  |
| entB; isochorismatase family protein                   |               |        |        |        |               |        |        |        |               |        |        |        |               |        |        |        |               |        |        |        |                |        |        |        |                         |     |       |       |    |    |    |   |   |   |   |  |  |
| <b>SGO_0434</b>                                        | -0.624        | 7.577  | 0.0152 | 0.0669 | -0.559        | 7.587  | 0.0084 | 0.0265 | <b>-0.962</b> | 7.443  | 0.0026 | 0.0113 | 0.066         | 6.756  | 0.1206 | 0.9195 | -0.338        | 5.963  | 0.0483 | 0.2909 | -0.404         | 6.589  | 0.0524 | 0.1213 |                         |     |       |       |    |    |    |   |   |   |   |  |  |
| aspS-2; aspartyl-tRNA synthetase                       |               |        |        |        |               |        |        |        |               |        |        |        |               |        |        |        |               |        |        |        |                |        |        |        |                         |     |       |       |    |    |    |   |   |   |   |  |  |
| <b>SGO_0435</b>                                        | -0.058        | 6.298  | 0.0814 | 0.5104 | -0.003        | 6.327  | 0.1779 | 0.9549 | 0.062         | 6.359  | 0.0647 | 0.5867 | 0.055         | 5.782  | 0.0639 | 0.4458 | 0.120         | 5.204  | 0.0298 | 0.1626 | 0.065          | 5.843  | 0.1504 | 0.4844 |                         |     |       |       |    |    |    |   |   |   |   |  |  |
| gatC; glutamyl-tRNA(Gln) amidotransferase, C subunit   |               |        |        |        |               |        |        |        |               |        |        |        |               |        |        |        |               |        |        |        |                |        |        |        |                         |     |       |       |    |    |    |   |   |   |   |  |  |
| <b>SGO_0436</b>                                        | <b>-0.868</b> | 9.074  | 0.0011 | 0.0021 | -0.300        | 9.301  | 0.0091 | 0.0294 | <b>-0.390</b> | 9.261  | 0.0025 | 0.0108 | <b>0.568</b>  | 8.373  | 0.0013 | 0.0027 | <b>0.478</b>  | 7.708  | 0.0009 | 0.0010 | -0.090         | 8.584  | 0.0541 | 0.1266 |                         |     |       |       |    |    |    |   |   |   |   |  |  |
| gatA; glutamyl-tRNA(Gln) amidotransferase, A subunit   |               |        |        |        |               |        |        |        |               |        |        |        |               |        |        |        |               |        |        |        |                |        |        |        |                         |     |       |       |    |    |    |   |   |   |   |  |  |

Show detected proteins only  
 Show all proteins

Proteins found:  
1179

Dot Plots  
 Dot Plots

Filter by category:  
ABC Transporter

Test

Cutoff

q-Value

p-Value

.005

| Signif | Direction | Applies To   |
|--------|-----------|--------------|
| yes    | +         | ratios, bars |
| no     | n/a       | bars         |
| yes    | -         | ratios, bars |
| yes    | +         | p-, q-Values |
| yes    | -         | p-, q-Values |

SgFn vs Sg —  — SgPg vs Sg  
SgPgFn vs Sg —  — SgPg vs SgFn  
SgPgFn vs SgFn —  — SgPgFn vs SgPg

Summary Table SgFn vs Sg SgPg vs Sg SgPgFn vs Sg SgPg v SgFn SgPgFn v SgFn SgPgFn vs SgPg Coverage

| Protein                                                      | SgFn vs Sg    |        |        |        | SgPg vs Sg    |        |        |        | SgPgFn vs Sg  |        |        |        | SgPg v SgFn   |       |        |        | SgPgFn v SgFn |       |        |        | SgPgFn vs SgPg |       |        |        | Log <sub>2</sub> Ratios |     |       |       |    |    |    |   |   |   |   |  |
|--------------------------------------------------------------|---------------|--------|--------|--------|---------------|--------|--------|--------|---------------|--------|--------|--------|---------------|-------|--------|--------|---------------|-------|--------|--------|----------------|-------|--------|--------|-------------------------|-----|-------|-------|----|----|----|---|---|---|---|--|
|                                                              | Ratio         | Sum    | q-Val  | p-Val  | Ratio         | Sum    | q-Val  | p-Val  | Ratio         | Sum    | q-Val  | p-Val  | Ratio         | Sum   | q-Val  | p-Val  | Ratio         | Sum   | q-Val  | p-Val  | Ratio          | Sum   | q-Val  | p-Val  | Ratio                   | Sum | q-Val | p-Val | -6 | -4 | -2 | 0 | 2 | 4 | 6 |  |
| <b>SGO_0437</b>                                              | -0.052        | 8.674  | 0.1104 | 0.7212 | <b>0.549</b>  | 8.996  | 0.0018 | 0.0038 | 0.341         | 8.903  | 0.0263 | 0.2113 | <b>0.601</b>  | 8.467 | 0.0037 | 0.0121 | 0.393         | 7.762 | 0.0355 | 0.2029 | -0.208         | 8.655 | 0.1558 | 0.5048 |                         |     |       |       |    |    |    |   |   |   |   |  |
| gatB; glutamyl-tRNA(Gln) amidotransferase, B subunit         |               |        |        |        |               |        |        |        |               |        |        |        |               |       |        |        |               |       |        |        |                |       |        |        |                         |     |       |       |    |    |    |   |   |   |   |  |
| <b>SGO_0440</b>                                              | <b>4.334</b>  | 7.132  | 0.0002 | 0.0002 | <b>1.808</b>  | 4.908  | 0.0017 | 0.0035 | <b>1.671</b>  | 4.100  | 0.0035 | 0.0167 | <b>-2.526</b> | 6.782 | 0.0004 | 0.0003 | -2.663        | 6.048 | 0.0122 | 0.0534 | -0.137         | 4.572 | 0.1770 | 0.6170 |                         |     |       |       |    |    |    |   |   |   |   |  |
| L-iditol 2-dehydrogenase BH3949                              |               |        |        |        |               |        |        |        |               |        |        |        |               |       |        |        |               |       |        |        |                |       |        |        |                         |     |       |       |    |    |    |   |   |   |   |  |
| <b>SGO_0444</b>                                              |               | 3.087  |        |        |               | 3.087  |        |        |               | 3.087  |        |        |               |       |        |        |               |       |        |        |                |       |        |        |                         |     |       |       |    |    |    |   |   |   |   |  |
| HAD superfamily (subfamily IIIA) phosphatase, TIGR01668      |               |        |        |        |               |        |        |        |               |        |        |        |               |       |        |        |               |       |        |        |                |       |        |        |                         |     |       |       |    |    |    |   |   |   |   |  |
| <b>SGO_0445</b>                                              | <b>0.991</b>  | 7.156  | 0.0005 | 0.0006 | 0.374         | 6.781  | 0.0137 | 0.0486 | -0.388        | 6.403  | 0.0100 | 0.0638 | <b>-0.617</b> | 6.781 | 0.0019 | 0.0044 | <b>-1.379</b> | 5.916 | 0.0006 | 0.0005 | -0.762         | 6.115 | 0.0125 | 0.0132 |                         |     |       |       |    |    |    |   |   |   |   |  |
| GTP-binding protein                                          |               |        |        |        |               |        |        |        |               |        |        |        |               |       |        |        |               |       |        |        |                |       |        |        |                         |     |       |       |    |    |    |   |   |   |   |  |
| <b>SGO_0446</b>                                              |               | 3.585  |        |        |               | 3.585  |        |        |               | 3.585  |        |        |               |       |        |        |               |       |        |        |                |       |        |        |                         |     |       |       |    |    |    |   |   |   |   |  |
| conserved hypothetical protein TIGR00253                     |               |        |        |        |               |        |        |        |               |        |        |        |               |       |        |        |               |       |        |        |                |       |        |        |                         |     |       |       |    |    |    |   |   |   |   |  |
| <b>SGO_0447</b>                                              | 0.891         | 5.986  | 0.0080 | 0.0300 | -0.822        | 5.135  | 0.0144 | 0.0518 |               | 4.453  |        |        | <b>-1.713</b> | 5.261 | 0.0044 | 0.0155 |               | 4.251 |        |        |                | 3.212 |        |        |                         |     |       |       |    |    |    |   |   |   |   |  |
| nadD; nicotinate (nicotinamide) nucleotide adenyltransferase |               |        |        |        |               |        |        |        |               |        |        |        |               |       |        |        |               |       |        |        |                |       |        |        |                         |     |       |       |    |    |    |   |   |   |   |  |
| <b>SGO_0448</b>                                              | <b>1.496</b>  | 5.978  | 0.0028 | 0.0078 | 0.170         | 5.137  | 0.1330 | 0.6801 | -1.036        | 4.384  | 0.0375 | 0.3180 | <b>-1.326</b> | 5.495 | 0.0019 | 0.0046 | -2.532        | 4.521 | 0.0206 | 0.1025 | -1.206         | 3.960 | 0.0358 | 0.0691 |                         |     |       |       |    |    |    |   |   |   |   |  |
| conserved hypothetical protein TIGR00488                     |               |        |        |        |               |        |        |        |               |        |        |        |               |       |        |        |               |       |        |        |                |       |        |        |                         |     |       |       |    |    |    |   |   |   |   |  |
| <b>SGO_0449</b>                                              |               | 1.585  |        |        |               | 1.585  |        |        |               | 1.585  |        |        |               |       |        |        |               |       |        |        |                |       |        |        |                         |     |       |       |    |    |    |   |   |   |   |  |
| isochorismatase family protein                               |               |        |        |        |               |        |        |        |               |        |        |        |               |       |        |        |               |       |        |        |                |       |        |        |                         |     |       |       |    |    |    |   |   |   |   |  |
| <b>SGO_0450</b>                                              | 1.587         | 4.981  | 0.0111 | 0.0443 | 1.018         | 4.508  | 0.0199 | 0.0773 |               | 2.170  |        |        | <b>-0.570</b> | 4.989 | 0.0013 | 0.0029 |               | 3.635 |        |        |                | 3.677 |        |        |                         |     |       |       |    |    |    |   |   |   |   |  |
| iojap-related protein                                        |               |        |        |        |               |        |        |        |               |        |        |        |               |       |        |        |               |       |        |        |                |       |        |        |                         |     |       |       |    |    |    |   |   |   |   |  |
| <b>SGO_0451</b>                                              |               |        |        |        |               | 3.791  |        |        |               |        |        |        |               | 3.278 |        |        |               |       |        |        |                | 3.278 |        |        |                         |     |       |       |    |    |    |   |   |   |   |  |
| methyltransferase                                            |               |        |        |        |               |        |        |        |               |        |        |        |               |       |        |        |               |       |        |        |                |       |        |        |                         |     |       |       |    |    |    |   |   |   |   |  |
| <b>SGO_0453</b>                                              |               | 7.985  |        |        |               | 7.985  |        |        |               | 7.985  |        |        |               |       |        |        |               |       |        |        |                |       |        |        |                         |     |       |       |    |    |    |   |   |   |   |  |
| lipoprotein, putative                                        |               |        |        |        |               |        |        |        |               |        |        |        |               |       |        |        |               |       |        |        |                |       |        |        |                         |     |       |       |    |    |    |   |   |   |   |  |
| <b>SGO_0454</b>                                              | 0.166         | 7.715  | 0.0699 | 0.4277 | 0.236         | 7.740  | 0.0327 | 0.1365 | -0.263        | 7.542  | 0.0681 | 0.6242 | 0.070         | 7.311 | 0.1040 | 0.7740 | -0.429        | 6.514 | 0.0563 | 0.3573 | -0.499         | 7.151 | 0.0878 | 0.2397 |                         |     |       |       |    |    |    |   |   |   |   |  |
| conserved hypothetical protein TIGR01033                     |               |        |        |        |               |        |        |        |               |        |        |        |               |       |        |        |               |       |        |        |                |       |        |        |                         |     |       |       |    |    |    |   |   |   |   |  |
| <b>SGO_0455</b>                                              | -5.504        | 8.234  | 0.0133 | 0.0563 | <b>-2.675</b> | 8.428  | 0.0004 | 0.0005 | <b>-3.589</b> | 8.338  | 0.0003 | 0.0004 | 2.829         | 5.127 | 0.0111 | 0.0532 | 1.915         | 3.733 | 0.0398 | 0.2313 | -0.914         | 5.663 | 0.0166 | 0.0204 |                         |     |       |       |    |    |    |   |   |   |   |  |
| lipoprotein, putative                                        |               |        |        |        |               |        |        |        |               |        |        |        |               |       |        |        |               |       |        |        |                |       |        |        |                         |     |       |       |    |    |    |   |   |   |   |  |
| <b>SGO_0456</b>                                              | <b>1.256</b>  | 5.488  | 0.0003 | 0.0003 |               | 3.732  |        |        |               | 3.732  |        |        |               | 4.469 |        |        |               | 3.858 |        |        |                |       |        |        |                         |     |       |       |    |    |    |   |   |   |   |  |
| ILL5; amino acid aminohydrolase                              |               |        |        |        |               |        |        |        |               |        |        |        |               |       |        |        |               |       |        |        |                |       |        |        |                         |     |       |       |    |    |    |   |   |   |   |  |
| <b>SGO_0457</b>                                              | <b>-3.171</b> | 9.200  | 0.0001 | 0.0000 | <b>-1.812</b> | 9.410  | 0.0002 | 0.0001 | <b>-1.713</b> | 9.432  | 0.0001 | 0.0001 | <b>1.359</b>  | 7.198 | 0.0002 | 0.0001 | <b>1.458</b>  | 6.659 | 0.0001 | 0.0000 | 0.099          | 7.774 | 0.0397 | 0.0810 |                         |     |       |       |    |    |    |   |   |   |   |  |
| ABC transporter, substrate-binding protein SP0148            |               |        |        |        |               |        |        |        |               |        |        |        |               |       |        |        |               |       |        |        |                |       |        |        |                         |     |       |       |    |    |    |   |   |   |   |  |
| <b>SGO_0458</b>                                              | <b>-2.885</b> | 10.776 | 0.0004 | 0.0004 | <b>-1.995</b> | 10.913 | 0.0005 | 0.0005 | <b>-1.927</b> | 10.927 | 0.0003 | 0.0006 | <b>0.889</b>  | 8.708 | 0.0015 | 0.0034 | <b>0.958</b>  | 8.142 | 0.0015 | 0.0029 | 0.069          | 9.113 | 0.0419 | 0.0868 |                         |     |       |       |    |    |    |   |   |   |   |  |
| hlpA; lipoprotein                                            |               |        |        |        |               |        |        |        |               |        |        |        |               |       |        |        |               |       |        |        |                |       |        |        |                         |     |       |       |    |    |    |   |   |   |   |  |

Show detected proteins only  
 Show all proteins

Filter by category:

Proteins found:  
1179

Dot Plots  
Dot Plots

Test Cutoff

| Signif | Direction | Applies To   |
|--------|-----------|--------------|
| yes    | +         | ratios, bars |
| no     | n/a       | bars         |
| yes    | -         | ratios, bars |
| yes    | +         | p-, q-Values |
| yes    | -         | p-, q-Values |

SgFn vs Sg — — SgPg vs Sg  
SgPgFn vs Sg — — SgPg vs SgFn  
SgPgFn vs SgFn — — SgPgFn vs SgPg



Summary Table SgFn vs Sg SgPg vs Sg SgPgFn vs Sg SgPg v SgFn SgPgFn v SgFn SgPgFn vs SgPg Coverage

| Protein                                              | SgFn vs Sg |       |        |        | SgPg vs Sg |       |        |        | SgPgFn vs Sg |       |        |        | SgPg v SgFn |       |        |        | SgPgFn v SgFn |       |        |        | SgPgFn vs SgPg |       |        |        | Log <sub>2</sub> Ratios |     |       |       |    |    |    |   |   |   |   |  |
|------------------------------------------------------|------------|-------|--------|--------|------------|-------|--------|--------|--------------|-------|--------|--------|-------------|-------|--------|--------|---------------|-------|--------|--------|----------------|-------|--------|--------|-------------------------|-----|-------|-------|----|----|----|---|---|---|---|--|
|                                                      | Ratio      | Sum   | q-Val  | p-Val  | Ratio      | Sum   | q-Val  | p-Val  | Ratio        | Sum   | q-Val  | p-Val  | Ratio       | Sum   | q-Val  | p-Val  | Ratio         | Sum   | q-Val  | p-Val  | Ratio          | Sum   | q-Val  | p-Val  | Ratio                   | Sum | q-Val | p-Val | -6 | -4 | -2 | 0 | 2 | 4 | 6 |  |
| <b>SGO_0459</b>                                      | 0.112      | 5.970 | 0.1341 | 0.8978 | -1.190     | 5.463 | 0.0169 | 0.0627 |              | 4.950 |        |        | -1.303      | 4.977 | 0.0023 | 0.0064 |               | 3.866 |        |        |                | 3.209 |        |        |                         |     |       |       |    |    |    |   |   |   |   |  |
| succinyl-diaminopimelate desuccinylase               |            |       |        |        |            |       |        |        |              |       |        |        |             |       |        |        |               |       |        |        |                |       |        |        |                         |     |       |       |    |    |    |   |   |   |   |  |
| <b>SGO_0460</b>                                      | -2.640     | 7.625 | 0.0007 | 0.0010 | -2.214     | 7.691 | 0.0008 | 0.0013 | -2.331       | 7.671 | 0.0005 | 0.0012 | 0.425       | 5.479 | 0.0025 | 0.0072 | 0.308         | 4.801 | 0.0014 | 0.0024 | -0.117         | 5.619 | 0.0524 | 0.1210 |                         |     |       |       |    |    |    |   |   |   |   |  |
| ABC transporter, ATP-binding protein SP0151          |            |       |        |        |            |       |        |        |              |       |        |        |             |       |        |        |               |       |        |        |                |       |        |        |                         |     |       |       |    |    |    |   |   |   |   |  |
| <b>SGO_0463</b>                                      |            | 2.723 |        |        |            | 2.723 |        |        |              | 2.723 |        |        |             |       |        |        |               |       |        |        |                |       |        |        |                         |     |       |       |    |    |    |   |   |   |   |  |
| cydD; putative ABC transporter (ATP-binding protein) |            |       |        |        |            |       |        |        |              |       |        |        |             |       |        |        |               |       |        |        |                |       |        |        |                         |     |       |       |    |    |    |   |   |   |   |  |
| <b>SGO_0468</b>                                      | 1.460      | 7.214 | 0.0095 | 0.0367 | -0.141     | 6.233 | 0.1049 | 0.5199 | -0.209       | 6.214 | 0.0553 | 0.4919 | -1.602      | 6.634 | 0.0051 | 0.0196 | -1.669        | 6.013 | 0.0058 | 0.0201 | -0.067         | 5.563 | 0.2181 | 0.8046 |                         |     |       |       |    |    |    |   |   |   |   |  |
| hypothetical protein SGO_0468                        |            |       |        |        |            |       |        |        |              |       |        |        |             |       |        |        |               |       |        |        |                |       |        |        |                         |     |       |       |    |    |    |   |   |   |   |  |
| <b>SGO_0469</b>                                      |            | 4.352 |        |        |            | 4.352 |        |        |              | 4.352 |        |        |             |       |        |        |               |       |        |        |                |       |        |        |                         |     |       |       |    |    |    |   |   |   |   |  |
| integral membrane protein                            |            |       |        |        |            |       |        |        |              |       |        |        |             |       |        |        |               |       |        |        |                |       |        |        |                         |     |       |       |    |    |    |   |   |   |   |  |
| <b>SGO_0476</b>                                      | -1.320     | 4.817 | 0.0152 | 0.0670 | 1.201      | 6.277 | 0.0008 | 0.0012 | 1.297        | 6.342 | 0.0002 | 0.0002 | 2.521       | 5.363 | 0.0119 | 0.0583 | 2.617         | 4.838 | 0.0082 | 0.0313 | 0.096          | 6.290 | 0.0979 | 0.2804 |                         |     |       |       |    |    |    |   |   |   |   |  |
| rhodanese family protein                             |            |       |        |        |            |       |        |        |              |       |        |        |             |       |        |        |               |       |        |        |                |       |        |        |                         |     |       |       |    |    |    |   |   |   |   |  |
| <b>SGO_0480</b>                                      | 6.692      | 9.969 | 0.0405 | 0.2217 | 2.150      | 5.482 | 0.0231 | 0.0917 | 0.737        | 3.585 |        |        | -4.542      | 9.506 | 0.0050 | 0.0191 | -5.955        | 8.849 | 0.0388 | 0.2230 | -1.413         | 5.063 | 0.0499 | 0.1131 |                         |     |       |       |    |    |    |   |   |   |   |  |
| hypothetical protein SGO_0480                        |            |       |        |        |            |       |        |        |              |       |        |        |             |       |        |        |               |       |        |        |                |       |        |        |                         |     |       |       |    |    |    |   |   |   |   |  |
| <b>SGO_0483</b>                                      | 0.666      | 6.247 | 0.0052 | 0.0168 | 0.911      | 6.419 | 0.0108 | 0.0362 | 0.979        | 6.445 | 0.0011 | 0.0035 | 0.245       | 6.162 | 0.0367 | 0.2361 | 0.313         | 5.573 | 0.0011 | 0.0015 | 0.069          | 6.312 | 0.2214 | 0.8252 |                         |     |       |       |    |    |    |   |   |   |   |  |
| hypothetical protein SGO_0483                        |            |       |        |        |            |       |        |        |              |       |        |        |             |       |        |        |               |       |        |        |                |       |        |        |                         |     |       |       |    |    |    |   |   |   |   |  |
| <b>SGO_0484</b>                                      | -0.367     | 4.981 | 0.0680 | 0.4142 |            | 4.515 |        |        |              | 4.515 |        |        |             | 2.611 |        |        |               | 2.000 |        |        |                |       |        |        |                         |     |       |       |    |    |    |   |   |   |   |  |
| sensor histidine kinase                              |            |       |        |        |            |       |        |        |              |       |        |        |             |       |        |        |               |       |        |        |                |       |        |        |                         |     |       |       |    |    |    |   |   |   |   |  |
| <b>SGO_0488</b>                                      | -2.214     | 6.635 | 0.0018 | 0.0041 | -2.054     | 6.608 | 0.0002 | 0.0001 |              | 6.297 |        |        | 0.160       | 4.799 | 0.1077 | 0.8086 |               | 3.254 |        |        |                | 3.730 |        |        |                         |     |       |       |    |    |    |   |   |   |   |  |
| ABC transporter, ATP-binding protein SP0483          |            |       |        |        |            |       |        |        |              |       |        |        |             |       |        |        |               |       |        |        |                |       |        |        |                         |     |       |       |    |    |    |   |   |   |   |  |
| <b>SGO_0491</b>                                      |            | 4.342 |        |        |            | 3.343 |        |        |              |       |        |        | -1.048      | 4.414 | 0.0033 | 0.0108 |               | 3.218 |        |        |                | 2.830 |        |        |                         |     |       |       |    |    |    |   |   |   |   |  |
| gidB; methyltransferase GidB                         |            |       |        |        |            |       |        |        |              |       |        |        |             |       |        |        |               |       |        |        |                |       |        |        |                         |     |       |       |    |    |    |   |   |   |   |  |
| <b>SGO_0494</b>                                      | 3.418      | 8.065 | 0.0010 | 0.0018 | 1.064      | 6.136 | 0.0009 | 0.0013 |              | 4.516 |        |        | -2.354      | 7.679 | 0.0013 | 0.0025 |               | 6.813 |        |        |                | 5.055 |        |        |                         |     |       |       |    |    |    |   |   |   |   |  |
| lemA; LemA-like protein                              |            |       |        |        |            |       |        |        |              |       |        |        |             |       |        |        |               |       |        |        |                |       |        |        |                         |     |       |       |    |    |    |   |   |   |   |  |
| <b>SGO_0495</b>                                      | 0.441      | 5.691 | 0.0257 | 0.1271 | -0.397     | 4.932 | 0.0987 | 0.4863 |              | 4.481 |        |        | -0.838      | 4.717 | 0.0118 | 0.0577 |               | 3.751 |        |        |                | 2.523 |        |        |                         |     |       |       |    |    |    |   |   |   |   |  |
| htpx; heat shock protein                             |            |       |        |        |            |       |        |        |              |       |        |        |             |       |        |        |               |       |        |        |                |       |        |        |                         |     |       |       |    |    |    |   |   |   |   |  |
| <b>SGO_0497</b>                                      |            | 9.226 |        |        |            |       |        |        |              | 1.981 |        |        |             | 8.713 |        |        | -6.245        | 8.111 | 0.0022 | 0.0054 |                | 1.468 |        |        |                         |     |       |       |    |    |    |   |   |   |   |  |
| gtfG; glucosyltransferase G                          |            |       |        |        |            |       |        |        |              |       |        |        |             |       |        |        |               |       |        |        |                |       |        |        |                         |     |       |       |    |    |    |   |   |   |   |  |
| <b>SGO_0500</b>                                      |            | 2.058 |        |        |            | 2.058 |        |        |              | 2.058 |        |        |             |       |        |        |               |       |        |        |                |       |        |        |                         |     |       |       |    |    |    |   |   |   |   |  |
| rggD; putative transcriptional regulator RggD        |            |       |        |        |            |       |        |        |              |       |        |        |             |       |        |        |               |       |        |        |                |       |        |        |                         |     |       |       |    |    |    |   |   |   |   |  |
| <b>SGO_0501</b>                                      | -1.705     | 5.727 | 0.0055 | 0.0183 | 0.653      | 6.885 | 0.0004 | 0.0004 | 0.967        | 7.084 | 0.0000 | 0.0000 | 2.358       | 5.796 | 0.0062 | 0.0253 | 2.672         | 5.473 | 0.0013 | 0.0023 | 0.314          | 6.827 | 0.0037 | 0.0010 |                         |     |       |       |    |    |    |   |   |   |   |  |
| Uncharacterized ACR, COG1399                         |            |       |        |        |            |       |        |        |              |       |        |        |             |       |        |        |               |       |        |        |                |       |        |        |                         |     |       |       |    |    |    |   |   |   |   |  |

Show detected proteins only  
 Show all proteins

Proteins found:  
1179

Dot Plots  
Dot Plots

Test

Cutoff

q-Value

.005

p-Value

| Signif | Direction | Applies To   |
|--------|-----------|--------------|
| yes    | +         | ratios, bars |
| no     | n/a       | bars         |
| yes    | -         | ratios, bars |
| yes    | +         | p-, q-Values |
| yes    | -         | p-, q-Values |

SgFn vs Sg —  
SgPgFn vs Sg —  
SgPgFn vs SgFn —  
SgPg vs Sg —  
SgPg vs SgFn —  
-SgPgFn vs SgPg

Summary Table SgFn vs Sg SgPg vs Sg SgPgFn vs Sg SgPg v SgFn SgPgFn v SgFn SgPgFn vs SgPg Coverage

| Protein                                                                                      | SgFn vs Sg |        |        |        | SgPg vs Sg |        |        |        | SgPgFn vs Sg |        |        |        | SgPg v SgFn |        |        |        | SgPgFn v SgFn |        |        |        | SgPgFn vs SgPg |        |        |        | Log <sub>2</sub> Ratios |     |       |       |    |    |    |   |   |   |   |  |
|----------------------------------------------------------------------------------------------|------------|--------|--------|--------|------------|--------|--------|--------|--------------|--------|--------|--------|-------------|--------|--------|--------|---------------|--------|--------|--------|----------------|--------|--------|--------|-------------------------|-----|-------|-------|----|----|----|---|---|---|---|--|
|                                                                                              | Ratio      | Sum    | q-Val  | p-Val  | Ratio      | Sum    | q-Val  | p-Val  | Ratio        | Sum    | q-Val  | p-Val  | Ratio       | Sum    | q-Val  | p-Val  | Ratio         | Sum    | q-Val  | p-Val  | Ratio          | Sum    | q-Val  | p-Val  | Ratio                   | Sum | q-Val | p-Val | -6 | -4 | -2 | 0 | 2 | 4 | 6 |  |
| <b>SGO_0502</b><br>floL; flotillin-like protein                                              | -1.901     | 9.535  | 0.0003 | 0.0003 | -0.710     | 9.878  | 0.0016 | 0.0032 | -1.046       | 9.757  | 0.0002 | 0.0002 | -1.192      | 8.502  | 0.0023 | 0.0064 | -0.856        | 7.662  | 0.0028 | 0.0076 | -0.336         | 8.810  | 0.0263 | 0.0431 |                         |     |       |       |    |    |    |   |   |   |   |  |
| <b>SGO_0503</b><br>gnd; 6-phosphogluconate dehydrogenase, decarboxylating                    | 1.705      | 11.551 | 0.0001 | 0.0001 | 0.873      | 10.962 | 0.0003 | 0.0002 | 1.201        | 11.183 | 0.0002 | 0.0003 | -0.832      | 11.295 | 0.0004 | 0.0003 | -0.504        | 10.811 | 0.0012 | 0.0018 | 0.328          | 10.994 | 0.0086 | 0.0064 |                         |     |       |       |    |    |    |   |   |   |   |  |
| <b>SGO_0505</b><br>PTS system, IIBC component                                                | -3.594     | 10.971 | 0.0001 | 0.0000 | -3.384     | 10.986 | 0.0001 | 0.0000 | -3.763       | 10.957 | 0.0001 | 0.0000 | 0.210       | 7.872  | 0.0512 | 0.3479 | -0.169        | 7.069  | 0.0565 | 0.3604 | -0.379         | 7.786  | 0.0264 | 0.0435 |                         |     |       |       |    |    |    |   |   |   |   |  |
| <b>SGO_0506</b><br>rgfB; RgfB                                                                |            | 3.000  |        |        | -1.165     | 3.532  |        |        |              | 3.000  |        |        |             | 1.322  |        |        |               |        |        |        |                | 1.322  |        |        |                         |     |       |       |    |    |    |   |   |   |   |  |
| <b>SGO_0508</b><br>nrdR; transcriptional regulator, NrdR family                              | -0.432     | 6.099  | 0.0118 | 0.0489 | -0.519     | 6.409  | 0.0010 | 0.0016 | -0.317       | 6.498  | 0.0061 | 0.0338 | -0.087      | 5.228  | 0.0712 | 0.5085 | 0.116         | 4.756  | 0.0856 | 0.5856 | 0.202          | 5.722  | 0.0616 | 0.1493 |                         |     |       |       |    |    |    |   |   |   |   |  |
| <b>SGO_0509</b><br>Replication initiation and membrane attachment protein (DnaB) superfamily |            | 4.188  |        |        | -1.245     | 4.446  | 0.0735 | 0.3492 |              | 4.188  |        |        |             | 1.322  |        |        |               |        |        |        |                | 1.322  |        |        |                         |     |       |       |    |    |    |   |   |   |   |  |
| <b>SGO_0510</b><br>dnaI; primosomal protein DnaI                                             | 1.340      | 5.852  | 0.0052 | 0.0170 | 1.688      | 6.091  | 0.0010 | 0.0015 | 1.171        | 5.714  | 0.0011 | 0.0038 | 0.348       | 6.032  | 0.0275 | 0.1659 | -0.169        | 5.157  | 0.0612 | 0.3971 | -0.517         | 5.948  | 0.0158 | 0.0183 |                         |     |       |       |    |    |    |   |   |   |   |  |
| <b>SGO_0511</b><br>NADPH-flavin oxidoreductase-like protein                                  | 1.306      | 5.805  | 0.0113 | 0.0460 | 0.194      | 5.117  | 0.1773 | 0.9470 | 0.216        | 5.138  | 0.0919 | 0.8722 | -1.112      | 5.300  | 0.0054 | 0.0209 | -1.090        | 4.703  | 0.0072 | 0.0263 | 0.022          | 4.638  | 0.2139 | 0.7868 |                         |     |       |       |    |    |    |   |   |   |   |  |
| <b>SGO_0512</b><br>GTP-binding protein engA                                                  | 0.201      | 7.827  | 0.0613 | 0.3659 | 0.530      | 8.008  | 0.0100 | 0.0333 | 0.771        | 8.160  | 0.0043 | 0.0222 | 0.329       | 7.571  | 0.0043 | 0.0149 | 0.571         | 7.105  | 0.0060 | 0.0210 | 0.241          | 7.855  | 0.0443 | 0.0950 |                         |     |       |       |    |    |    |   |   |   |   |  |
| <b>SGO_0513</b><br>Snf2 family protein                                                       | 0.668      | 4.254  | 0.0524 | 0.3005 |            | 2.170  |        |        |              | 2.170  |        |        |             | 3.353  |        |        |               | 2.742  |        |        |                |        |        |        |                         |     |       |       |    |    |    |   |   |   |   |  |
| <b>SGO_0514</b><br>hypothetical protein SGO_0514                                             |            |        |        |        |            | 3.791  |        |        |              |        |        |        |             | 3.278  |        |        |               |        |        |        |                | 3.278  |        |        |                         |     |       |       |    |    |    |   |   |   |   |  |
| <b>SGO_0515</b><br>murC; UDP-N-acetylmuramate--alanine ligase                                | 0.612      | 8.759  | 0.0031 | 0.0092 | 0.105      | 8.471  | 0.0142 | 0.0507 | 0.490        | 8.689  | 0.0047 | 0.0250 | -0.507      | 8.288  | 0.0038 | 0.0126 | -0.122        | 7.853  | 0.0635 | 0.4155 | 0.385          | 8.219  | 0.0246 | 0.0388 |                         |     |       |       |    |    |    |   |   |   |   |  |
| <b>SGO_0518</b><br>aminodeoxychorismate lyase-like protein                                   | -2.664     | 8.637  | 0.0001 | 0.0000 | -1.438     | 8.879  | 0.0001 | 0.0001 | -1.560       | 8.849  | 0.0002 | 0.0001 | 1.227       | 6.988  | 0.0002 | 0.0001 | 1.104         | 6.297  | 0.0015 | 0.0027 | -0.123         | 7.418  | 0.0956 | 0.2702 |                         |     |       |       |    |    |    |   |   |   |   |  |
| <b>SGO_0519</b><br>greA; transcription elongation factor greA                                | 0.050      | 7.158  | 0.1070 | 0.6966 | 0.526      | 7.415  | 0.0087 | 0.0280 | 0.177        | 7.214  | 0.0112 | 0.0744 | 0.476       | 6.929  | 0.0132 | 0.0679 | 0.127         | 6.121  | 0.0722 | 0.4804 | -0.349         | 6.975  | 0.0315 | 0.0556 |                         |     |       |       |    |    |    |   |   |   |   |  |
| <b>SGO_0521</b><br>Membrane protein oxaA 2 precursor                                         | -0.573     | 5.942  | 0.0557 | 0.3239 | -1.082     | 6.092  | 0.0080 | 0.0248 |              | 5.531  |        |        | -0.509      | 4.706  | 0.0488 | 0.3295 |               | 2.807  |        |        |                | 3.945  |        |        |                         |     |       |       |    |    |    |   |   |   |   |  |
| <b>SGO_0523</b><br>spoU rRNA Methylase family protein                                        | 2.159      | 6.704  | 0.0005 | 0.0007 | 0.164      | 5.107  | 0.1254 | 0.6344 |              | 3.392  |        |        | -1.995      | 6.366  | 0.0002 | 0.0001 |               | 5.427  |        |        |                | 4.070  |        |        |                         |     |       |       |    |    |    |   |   |   |   |  |

Show detected proteins only  
 Show all proteins

Proteins found:  
1179

Filter by category:  
ABC Transporter

Dot Plots  
Dot Plots

Test

Cutoff

q-Value

p-Value

.005

| Signif | Direction | Applies To   |
|--------|-----------|--------------|
| yes    | +         | ratios, bars |
| no     | n/a       | bars         |
| yes    | -         | ratios, bars |
| yes    | +         | p-, q-Values |
| yes    | -         | p-, q-Values |

SgFn vs Sg — SgPg vs Sg —   
SgPgFn vs Sg — SgPgFn vs SgFn —   
SgPgFn vs SgFn — SgPgFn vs SgPg —

Summary Table SgFn vs Sg SgPg vs Sg SgPgFn vs Sg SgPg v SgFn SgPgFn v SgFn SgPgFn vs SgPg Coverage

| Protein                                                                          | SgFn vs Sg |       |        |        | SgPg vs Sg |       |        |        | SgPgFn vs Sg |       |        |        | SgPg v SgFn |       |        |        | SgPgFn v SgFn |       |        |        | SgPgFn vs SgPg |       |        |        | Log <sub>2</sub> Ratios |     |       |       |    |    |    |   |   |   |   |  |
|----------------------------------------------------------------------------------|------------|-------|--------|--------|------------|-------|--------|--------|--------------|-------|--------|--------|-------------|-------|--------|--------|---------------|-------|--------|--------|----------------|-------|--------|--------|-------------------------|-----|-------|-------|----|----|----|---|---|---|---|--|
|                                                                                  | Ratio      | Sum   | q-Val  | p-Val  | Ratio      | Sum   | q-Val  | p-Val  | Ratio        | Sum   | q-Val  | p-Val  | Ratio       | Sum   | q-Val  | p-Val  | Ratio         | Sum   | q-Val  | p-Val  | Ratio          | Sum   | q-Val  | p-Val  | Ratio                   | Sum | q-Val | p-Val | -6 | -4 | -2 | 0 | 2 | 4 | 6 |  |
| <b>SGO_0526</b><br>ilvB; acetolactate synthase, large subunit, biosynthetic type | 0.727      | 6.089 | 0.0277 | 0.1410 | 0.991      | 6.225 | 0.0078 | 0.0239 | -0.429       | 5.467 | 0.0284 | 0.2290 | 0.264       | 5.998 | 0.0611 | 0.4254 | -1.156        | 4.798 | 0.0101 | 0.0413 | -1.420         | 5.561 | 0.0050 | 0.0022 |                         |     |       |       |    |    |    |   |   |   |   |  |
| <b>SGO_0527</b><br>ilvN; acetolactate synthase, small subunit                    | 0.008      | 5.759 | 0.1306 | 0.8672 | -0.395     | 5.587 | 0.0288 | 0.1179 | -1.584       | 4.978 | 0.0063 | 0.0350 | -0.403      | 5.078 | 0.0196 | 0.1122 | -1.592        | 3.861 | 0.0089 | 0.0352 | -1.189         | 4.162 | 0.0867 | 0.2343 |                         |     |       |       |    |    |    |   |   |   |   |  |
| <b>SGO_0528</b><br>ilvC; ketol-acid reductoisomerase                             | 1.026      | 8.815 | 0.0020 | 0.0049 | 0.581      | 8.528 | 0.0018 | 0.0039 | 0.292        | 8.366 | 0.0128 | 0.0887 | -0.445      | 8.520 | 0.0078 | 0.0339 | -0.734        | 7.797 | 0.0048 | 0.0157 | -0.289         | 8.143 | 0.0423 | 0.0885 |                         |     |       |       |    |    |    |   |   |   |   |  |
| <b>SGO_0529</b><br>ilvA; threonine dehydratase                                   | 1.907      | 5.080 | 0.0065 | 0.0226 | 1.401      | 4.686 | 0.0093 | 0.0302 | 1.149        | 3.915 | 0.0332 | 0.2748 | -0.507      | 4.959 | 0.0259 | 0.1541 | -0.759        | 3.952 | 0.0542 | 0.3391 | -0.252         | 4.168 | 0.1566 | 0.5093 |                         |     |       |       |    |    |    |   |   |   |   |  |
| <b>SGO_0530</b><br>Cof family protein                                            | -0.427     | 5.304 | 0.0251 | 0.1236 | -1.277     | 5.023 | 0.0059 | 0.0174 |              | 4.486 |        |        | -0.849      | 4.253 | 0.0220 | 0.1276 |               | 2.972 |        |        |                | 2.826 |        |        |                         |     |       |       |    |    |    |   |   |   |   |  |
| <b>SGO_0533</b><br>conserved hypothetical protein TIGR00150                      | 2.481      | 3.362 |        |        | 0.871      | 2.143 |        |        |              | 0.643 |        |        | -1.611      | 3.019 |        |        |               | 2.000 |        |        |                | 1.000 |        |        |                         |     |       |       |    |    |    |   |   |   |   |  |
| <b>SGO_0535</b><br>putative transcriptional regulator LytR                       | -2.494     | 6.747 | 0.0178 | 0.0800 | -2.237     | 6.905 | 0.0008 | 0.0011 | -2.636       | 6.736 | 0.0117 | 0.0784 | 0.257       | 4.384 | 0.0652 | 0.4574 | -0.143        | 2.930 |        |        | -0.400         | 4.343 | 0.1153 | 0.3452 |                         |     |       |       |    |    |    |   |   |   |   |  |
| <b>SGO_0536</b><br>hypothetical protein SGO_0536                                 |            | 6.082 |        |        | -0.177     | 6.995 | 0.0193 | 0.0745 | 0.019        | 7.090 | 0.0847 | 0.7979 |             | 5.390 |        |        |               | 4.975 |        |        | 0.196          | 6.491 | 0.0198 | 0.0277 |                         |     |       |       |    |    |    |   |   |   |   |  |
| <b>SGO_0537</b><br>HIT family protein                                            | 1.242      | 6.570 | 0.0008 | 0.0013 | 1.124      | 6.487 | 0.0008 | 0.0011 | 0.678        | 6.200 | 0.0029 | 0.0130 | -0.118      | 6.485 | 0.0126 | 0.0637 | -0.564        | 5.678 | 0.0016 | 0.0033 | -0.446         | 6.219 | 0.0051 | 0.0025 |                         |     |       |       |    |    |    |   |   |   |   |  |
| <b>SGO_0538</b><br>ABC transporter, ATP-binding protein SP0522                   | -0.908     | 6.861 | 0.0075 | 0.0275 | -2.541     | 6.463 | 0.0012 | 0.0020 |              | 6.232 |        |        | -1.633      | 5.245 | 0.0054 | 0.0210 |               | 4.236 |        |        |                | 3.195 |        |        |                         |     |       |       |    |    |    |   |   |   |   |  |
| <b>SGO_0539</b><br>ABC transporter, permease protein                             |            | 4.667 |        |        |            | 4.667 |        |        |              | 4.667 |        |        |             |       |        |        |               |       |        |        |                |       |        |        |                         |     |       |       |    |    |    |   |   |   |   |  |
| <b>SGO_0540</b><br>hypothetical protein SGO_0540                                 | 1.134      | 7.814 | 0.0003 | 0.0003 | 0.148      | 7.214 | 0.0131 | 0.0456 | -0.100       | 7.089 | 0.0204 | 0.1589 | -0.986      | 7.348 | 0.0004 | 0.0003 | -1.234        | 6.659 | 0.0004 | 0.0002 | -0.248         | 6.654 | 0.0094 | 0.0078 |                         |     |       |       |    |    |    |   |   |   |   |  |
| <b>SGO_0541</b><br>methyltransferase, putative                                   | -0.545     | 5.797 | 0.0064 | 0.0223 | -1.602     | 5.480 | 0.0030 | 0.0073 |              | 5.047 |        |        | -1.057      | 4.580 | 0.0057 | 0.0224 |               | 3.371 |        |        |                | 3.020 |        |        |                         |     |       |       |    |    |    |   |   |   |   |  |
| <b>SGO_0542</b><br>hypothetical protein SGO_0542                                 |            | 2.700 |        |        | -0.865     | 3.332 |        |        |              | 2.700 |        |        |             | 1.322 |        |        |               |       |        |        |                | 1.322 |        |        |                         |     |       |       |    |    |    |   |   |   |   |  |
| <b>SGO_0543</b><br>nusA; transcription termination factor NusA                   | -1.692     | 7.929 | 0.0001 | 0.0000 | -0.585     | 8.276 | 0.0002 | 0.0001 | -0.940       | 8.146 | 0.0003 | 0.0004 | 1.107       | 6.991 | 0.0000 | 0.0000 | 0.752         | 6.151 | 0.0016 | 0.0032 | -0.355         | 7.276 | 0.0105 | 0.0098 |                         |     |       |       |    |    |    |   |   |   |   |  |
| <b>SGO_0544</b><br>Protein of unknown function (DUF448) superfamily              |            | 2.000 |        |        |            | 2.000 |        |        |              | 2.000 |        |        |             |       |        |        |               |       |        |        |                |       |        |        |                         |     |       |       |    |    |    |   |   |   |   |  |

Show detected proteins only  
 Show all proteins

Proteins found:  
1179

Dot Plots  
 Dot Plots

Filter by category:  
ABC Transporter

Test

Cutoff

q-Value

.005

p-Value

| Signif | Direction | Applies To   |
|--------|-----------|--------------|
| yes    | +         | ratios, bars |
| no     | n/a       | bars         |
| yes    | -         | ratios, bars |
| yes    | +         | p-, q-Values |
| yes    | -         | p-, q-Values |

SgFn vs Sg —  — SgPg vs Sg  
SgPgFn vs Sg —  — SgPg v SgFn  
SgPgFn vs SgFn —  — SgPgFn vs SgPg  
SgPgFn vs SgPg —  — SgPgFn vs SgPg

Summary Table SgFn vs Sg SgPg vs Sg SgPgFn vs Sg SgPg v SgFn SgPgFn v SgFn SgPgFn vs SgPg Coverage

| Protein                                                            | SgFn vs Sg |       |        |        | SgPg vs Sg |       |        |        | SgPgFn vs Sg |       |        |        | SgPg v SgFn |       |        |        | SgPgFn v SgFn |       |        |        | SgPgFn vs SgPg |       |        |        | Log <sub>2</sub> Ratios |     |       |       |    |    |    |   |   |   |   |  |
|--------------------------------------------------------------------|------------|-------|--------|--------|------------|-------|--------|--------|--------------|-------|--------|--------|-------------|-------|--------|--------|---------------|-------|--------|--------|----------------|-------|--------|--------|-------------------------|-----|-------|-------|----|----|----|---|---|---|---|--|
|                                                                    | Ratio      | Sum   | q-Val  | p-Val  | Ratio      | Sum   | q-Val  | p-Val  | Ratio        | Sum   | q-Val  | p-Val  | Ratio       | Sum   | q-Val  | p-Val  | Ratio         | Sum   | q-Val  | p-Val  | Ratio          | Sum   | q-Val  | p-Val  | Ratio                   | Sum | q-Val | p-Val | -6 | -4 | -2 | 0 | 2 | 4 | 6 |  |
| SGO_0545                                                           |            | 1.807 |        |        |            | 1.807 |        |        |              | 1.807 |        |        |             |       |        |        |               |       |        |        |                |       |        |        |                         |     |       |       |    |    |    |   |   |   |   |  |
| ribosomal protein L7A family                                       |            |       |        |        |            |       |        |        |              |       |        |        |             |       |        |        |               |       |        |        |                |       |        |        |                         |     |       |       |    |    |    |   |   |   |   |  |
| SGO_0546                                                           | -0.307     | 8.766 | 0.0250 | 0.1222 | -0.138     | 8.842 | 0.0729 | 0.3461 | -0.475       | 8.700 | 0.0122 | 0.0836 | 0.170       | 8.171 | 0.0265 | 0.1583 | -0.168        | 7.401 | 0.0612 | 0.3987 | -0.338         | 8.102 | 0.0476 | 0.1054 |                         |     |       |       |    |    |    |   |   |   |   |  |
| infB; Translation initiation factor IF-2                           |            |       |        |        |            |       |        |        |              |       |        |        |             |       |        |        |               |       |        |        |                |       |        |        |                         |     |       |       |    |    |    |   |   |   |   |  |
| SGO_0547                                                           |            |       |        |        |            | 1.098 |        |        |              |       |        |        |             | 0.585 |        |        |               |       |        |        |                | 0.585 |        |        |                         |     |       |       |    |    |    |   |   |   |   |  |
| rbfA; ribosome-binding factor A                                    |            |       |        |        |            |       |        |        |              |       |        |        |             |       |        |        |               |       |        |        |                |       |        |        |                         |     |       |       |    |    |    |   |   |   |   |  |
| SGO_0548                                                           | -4.413     | 7.683 | 0.0137 | 0.0590 | -2.975     | 7.822 | 0.0004 | 0.0004 | -3.700       | 7.756 | 0.0003 | 0.0004 | 1.438       | 4.402 | 0.0127 | 0.0642 | 0.714         | 3.205 | 0.0101 | 0.0417 | -0.725         | 4.840 | 0.0050 | 0.0019 |                         |     |       |       |    |    |    |   |   |   |   |  |
| Na/Pi-cotransporter family protein                                 |            |       |        |        |            |       |        |        |              |       |        |        |             |       |        |        |               |       |        |        |                |       |        |        |                         |     |       |       |    |    |    |   |   |   |   |  |
| SGO_0549                                                           | -0.156     | 2.789 |        |        | 3.756      | 5.724 |        |        |              | 1.865 |        |        | 3.912       | 5.200 |        |        |               | 0.585 |        |        |                | 5.108 |        |        |                         |     |       |       |    |    |    |   |   |   |   |  |
| nagA; N-acetylglucosamine-6-phosphate deacetylase                  |            |       |        |        |            |       |        |        |              |       |        |        |             |       |        |        |               |       |        |        |                |       |        |        |                         |     |       |       |    |    |    |   |   |   |   |  |
| SGO_0552                                                           | 3.347      | 7.019 | 0.0005 | 0.0007 | 2.595      | 6.355 | 0.0004 | 0.0004 | 2.390        | 6.185 | 0.0004 | 0.0009 | -0.752      | 7.028 | 0.0022 | 0.0058 | -0.957        | 6.345 | 0.0017 | 0.0037 | -0.205         | 6.502 | 0.0184 | 0.0242 |                         |     |       |       |    |    |    |   |   |   |   |  |
| oxidoreductase, aldo/keto reductase family                         |            |       |        |        |            |       |        |        |              |       |        |        |             |       |        |        |               |       |        |        |                |       |        |        |                         |     |       |       |    |    |    |   |   |   |   |  |
| SGO_0554                                                           | 0.061      | 6.972 | 0.1305 | 0.8645 | -0.957     | 6.566 | 0.0297 | 0.1216 | -1.664       | 6.199 | 0.0395 | 0.3367 | -1.018      | 6.007 | 0.0028 | 0.0083 | -1.725        | 5.015 | 0.0204 | 0.1000 | -0.707         | 4.799 | 0.0921 | 0.2571 |                         |     |       |       |    |    |    |   |   |   |   |  |
| hsdR; type I site-specific deoxyribonuclease                       |            |       |        |        |            |       |        |        |              |       |        |        |             |       |        |        |               |       |        |        |                |       |        |        |                         |     |       |       |    |    |    |   |   |   |   |  |
| SGO_0556                                                           |            | 3.279 |        |        |            | 3.279 |        |        |              | 3.279 |        |        |             |       |        |        |               |       |        |        |                |       |        |        |                         |     |       |       |    |    |    |   |   |   |   |  |
| DNA helicase-like protein, putative                                |            |       |        |        |            |       |        |        |              |       |        |        |             |       |        |        |               |       |        |        |                |       |        |        |                         |     |       |       |    |    |    |   |   |   |   |  |
| SGO_0557                                                           |            | 1.807 |        |        |            | 1.807 |        |        |              | 1.807 |        |        |             |       |        |        |               |       |        |        |                |       |        |        |                         |     |       |       |    |    |    |   |   |   |   |  |
| HsdS specificity protein of type I restriction-modification system |            |       |        |        |            |       |        |        |              |       |        |        |             |       |        |        |               |       |        |        |                |       |        |        |                         |     |       |       |    |    |    |   |   |   |   |  |
| SGO_0558                                                           | 0.494      | 3.590 |        |        | 0.356      | 4.186 | 0.1015 | 0.5010 | 0.263        | 3.460 |        |        | -0.137      | 3.826 | 0.1100 | 0.8286 | -0.230        | 2.581 |        |        | -0.093         | 3.750 | 0.2118 | 0.7732 |                         |     |       |       |    |    |    |   |   |   |   |  |
| hypothetical protein SGO_0558                                      |            |       |        |        |            |       |        |        |              |       |        |        |             |       |        |        |               |       |        |        |                |       |        |        |                         |     |       |       |    |    |    |   |   |   |   |  |
| SGO_0560                                                           | -1.604     | 4.640 | 0.0073 | 0.0263 | 0.516      | 5.703 | 0.0024 | 0.0054 | -0.051       | 5.401 | 0.0810 | 0.7600 | 2.120       | 4.582 | 0.0118 | 0.0572 | 1.553         | 3.483 | 0.0247 | 0.1292 | -0.567         | 5.174 | 0.0151 | 0.0173 |                         |     |       |       |    |    |    |   |   |   |   |  |
| hsdM; type I restriction-modification system, M subunit            |            |       |        |        |            |       |        |        |              |       |        |        |             |       |        |        |               |       |        |        |                |       |        |        |                         |     |       |       |    |    |    |   |   |   |   |  |
| SGO_0565                                                           | 2.010      | 9.293 | 0.0008 | 0.0013 | 0.214      | 8.069 | 0.0140 | 0.0500 | 0.010        | 7.962 | 0.0921 | 0.8777 | -1.797      | 8.825 | 0.0009 | 0.0015 | -2.000        | 8.171 | 0.0010 | 0.0013 | -0.204         | 7.560 | 0.0246 | 0.0387 |                         |     |       |       |    |    |    |   |   |   |   |  |
| adhA; alcohol dehydrogenase                                        |            |       |        |        |            |       |        |        |              |       |        |        |             |       |        |        |               |       |        |        |                |       |        |        |                         |     |       |       |    |    |    |   |   |   |   |  |
| SGO_0566                                                           | 0.575      | 8.380 | 0.0109 | 0.0434 |            | 7.073 |        |        |              | 7.073 |        |        |             | 7.120 |        |        |               | 6.510 |        |        |                |       |        |        |                         |     |       |       |    |    |    |   |   |   |   |  |
| sgc; serine protease challisin                                     |            |       |        |        |            |       |        |        |              |       |        |        |             |       |        |        |               |       |        |        |                |       |        |        |                         |     |       |       |    |    |    |   |   |   |   |  |
| SGO_0568                                                           | -1.401     | 6.686 | 0.0013 | 0.0025 | 0.047      | 7.232 | 0.0949 | 0.4663 | -0.300       | 7.076 | 0.0184 | 0.1403 | 1.448       | 6.209 | 0.0014 | 0.0031 | 1.101         | 5.369 | 0.0073 | 0.0268 | -0.346         | 6.590 | 0.0499 | 0.1129 |                         |     |       |       |    |    |    |   |   |   |   |  |
| glyQ; glycyl-tRNA synthetase, alpha subunit                        |            |       |        |        |            |       |        |        |              |       |        |        |             |       |        |        |               |       |        |        |                |       |        |        |                         |     |       |       |    |    |    |   |   |   |   |  |
| SGO_0569                                                           | 0.390      | 8.405 | 0.0137 | 0.0586 | 0.474      | 8.445 | 0.0001 | 0.0001 | 0.301        | 8.362 | 0.0214 | 0.1686 | 0.084       | 8.115 | 0.0814 | 0.5918 | -0.089        | 7.432 | 0.1037 | 0.7297 | -0.173         | 8.079 | 0.1338 | 0.4182 |                         |     |       |       |    |    |    |   |   |   |   |  |
| glyS; glycyl-tRNA synthetase, beta subunit                         |            |       |        |        |            |       |        |        |              |       |        |        |             |       |        |        |               |       |        |        |                |       |        |        |                         |     |       |       |    |    |    |   |   |   |   |  |
| SGO_0570                                                           |            | 3.170 |        |        | -0.455     | 4.468 | 0.0111 | 0.0375 |              | 3.170 |        |        |             | 3.202 |        |        |               |       |        |        |                | 3.202 |        |        |                         |     |       |       |    |    |    |   |   |   |   |  |
| hypothetical protein SGO_0570                                      |            |       |        |        |            |       |        |        |              |       |        |        |             |       |        |        |               |       |        |        |                |       |        |        |                         |     |       |       |    |    |    |   |   |   |   |  |

Show detected proteins only  
 Show all proteins

Proteins found:  
1179

Dot Plots  
Dot Plots

Test

Cutoff

q-Value

p-Value

.005

| Signif | Direction | Applies To   |
|--------|-----------|--------------|
| yes    | +         | ratios, bars |
| no     | n/a       | bars         |
| yes    | -         | ratios, bars |
| yes    | +         | p-, q-Values |
| yes    | -         | p-, q-Values |

SgFn vs Sg — — SgPg vs Sg  
SgPgFn vs Sg — — SgPg vs SgFn  
SgPgFn vs SgFn — — SgPgFn vs SgPg

Summary Table SgFn vs Sg SgPg vs Sg SgPgFn vs Sg SgPg v SgFn SgPgFn v SgFn SgPgFn vs SgPg Coverage

| Protein                                                 | SgFn vs Sg |       |        |        | SgPg vs Sg |       |        |        | SgPgFn vs Sg |       |        |        | SgPg v SgFn |       |        |        | SgPgFn v SgFn |       |        |        | SgPgFn vs SgPg |       |        |        | Log <sub>2</sub> Ratios |     |       |       |    |    |    |   |   |   |   |  |
|---------------------------------------------------------|------------|-------|--------|--------|------------|-------|--------|--------|--------------|-------|--------|--------|-------------|-------|--------|--------|---------------|-------|--------|--------|----------------|-------|--------|--------|-------------------------|-----|-------|-------|----|----|----|---|---|---|---|--|
|                                                         | Ratio      | Sum   | q-Val  | p-Val  | Ratio      | Sum   | q-Val  | p-Val  | Ratio        | Sum   | q-Val  | p-Val  | Ratio       | Sum   | q-Val  | p-Val  | Ratio         | Sum   | q-Val  | p-Val  | Ratio          | Sum   | q-Val  | p-Val  | Ratio                   | Sum | q-Val | p-Val | -6 | -4 | -2 | 0 | 2 | 4 | 6 |  |
| SGO_0571                                                |            | 1.322 |        |        |            | 1.322 |        |        |              | 1.322 |        |        |             |       |        |        |               |       |        |        |                |       |        |        |                         |     |       |       |    |    |    |   |   |   |   |  |
| hypothetical protein SGO_0571                           |            |       |        |        |            |       |        |        |              |       |        |        |             |       |        |        |               |       |        |        |                |       |        |        |                         |     |       |       |    |    |    |   |   |   |   |  |
| SGO_0573                                                | 0.013      | 6.729 | 0.1339 | 0.8953 | -0.163     | 6.619 | 0.0727 | 0.3439 | -1.240       | 6.233 | 0.0046 | 0.0239 | -0.176      | 6.126 | 0.0588 | 0.4067 | -1.254        | 5.136 | 0.0101 | 0.0414 | -1.078         | 5.593 | 0.0120 | 0.0121 |                         |     |       |       |    |    |    |   |   |   |   |  |
| mraW; S-adenosyl-methyltransferase MraW                 |            |       |        |        |            |       |        |        |              |       |        |        |             |       |        |        |               |       |        |        |                |       |        |        |                         |     |       |       |    |    |    |   |   |   |   |  |
| SGO_0575                                                |            | 6.904 |        |        | -3.188     | 7.054 | 0.0001 | 0.0001 |              | 6.904 |        |        |             | 3.202 |        |        |               |       |        |        |                | 3.202 |        |        |                         |     |       |       |    |    |    |   |   |   |   |  |
| pbp2X; penicillin-binding protein 2X                    |            |       |        |        |            |       |        |        |              |       |        |        |             |       |        |        |               |       |        |        |                |       |        |        |                         |     |       |       |    |    |    |   |   |   |   |  |
| SGO_0576                                                |            | 3.087 |        |        |            | 3.087 |        |        |              | 3.087 |        |        |             |       |        |        |               |       |        |        |                |       |        |        |                         |     |       |       |    |    |    |   |   |   |   |  |
| mraY; phospho-N-acetylmuramoyl-pentapeptide-transferase |            |       |        |        |            |       |        |        |              |       |        |        |             |       |        |        |               |       |        |        |                |       |        |        |                         |     |       |       |    |    |    |   |   |   |   |  |
| SGO_0577                                                | -0.084     | 6.915 | 0.1306 | 0.8687 | 0.720      | 7.329 | 0.0064 | 0.0189 | 0.118        | 7.003 | 0.0712 | 0.6568 | 0.804       | 6.796 | 0.0075 | 0.0319 | 0.202         | 5.854 | 0.0868 | 0.5957 | -0.602         | 6.863 | 0.0238 | 0.0368 |                         |     |       |       |    |    |    |   |   |   |   |  |
| ATP-dependent RNA helicase                              |            |       |        |        |            |       |        |        |              |       |        |        |             |       |        |        |               |       |        |        |                |       |        |        |                         |     |       |       |    |    |    |   |   |   |   |  |
| SGO_0578                                                |            | 6.489 |        |        |            | 6.489 |        |        |              | 6.489 |        |        |             |       |        |        |               |       |        |        |                |       |        |        |                         |     |       |       |    |    |    |   |   |   |   |  |
| amino acid ABC transporter permease protein             |            |       |        |        |            |       |        |        |              |       |        |        |             |       |        |        |               |       |        |        |                |       |        |        |                         |     |       |       |    |    |    |   |   |   |   |  |
| SGO_0579                                                | -3.048     | 6.975 | 0.0001 | 0.0000 | -2.330     | 7.076 | 0.0002 | 0.0001 |              | 6.811 |        |        | 0.718       | 4.668 | 0.0075 | 0.0323 |               | 2.639 |        |        |                | 3.991 |        |        |                         |     |       |       |    |    |    |   |   |   |   |  |
| amino acid ABC transporter ATP binding protein          |            |       |        |        |            |       |        |        |              |       |        |        |             |       |        |        |               |       |        |        |                |       |        |        |                         |     |       |       |    |    |    |   |   |   |   |  |
| SGO_0581                                                | -0.401     | 5.554 | 0.0381 | 0.2059 | 0.719      | 6.131 | 0.0084 | 0.0264 | -0.136       | 5.652 | 0.0353 | 0.2946 | 1.121       | 5.490 | 0.0046 | 0.0168 | 0.265         | 4.348 | 0.0563 | 0.3569 | -0.856         | 5.563 | 0.0121 | 0.0124 |                         |     |       |       |    |    |    |   |   |   |   |  |
| trxB; thioredoxin-disulfide reductase                   |            |       |        |        |            |       |        |        |              |       |        |        |             |       |        |        |               |       |        |        |                |       |        |        |                         |     |       |       |    |    |    |   |   |   |   |  |
| SGO_0582                                                | 3.236      | 8.876 | 0.0000 | 0.0000 | 1.890      | 7.748 | 0.0025 | 0.0058 | 1.063        | 7.143 | 0.0042 | 0.0212 | -1.346      | 8.699 | 0.0006 | 0.0007 | -2.174        | 7.897 | 0.0002 | 0.0001 | -0.827         | 7.536 | 0.0224 | 0.0331 |                         |     |       |       |    |    |    |   |   |   |   |  |
| nicotinate phosphoribosyltransferase, putative          |            |       |        |        |            |       |        |        |              |       |        |        |             |       |        |        |               |       |        |        |                |       |        |        |                         |     |       |       |    |    |    |   |   |   |   |  |
| SGO_0583                                                | 2.312      | 6.694 | 0.0022 | 0.0058 | 1.345      | 5.936 | 0.0033 | 0.0083 | 0.732        | 5.536 | 0.0130 | 0.0915 | -0.967      | 6.490 | 0.0045 | 0.0163 | -1.580        | 5.703 | 0.0027 | 0.0071 | -0.613         | 5.640 | 0.0045 | 0.0014 |                         |     |       |       |    |    |    |   |   |   |   |  |
| nadE; NAD+ synthetase                                   |            |       |        |        |            |       |        |        |              |       |        |        |             |       |        |        |               |       |        |        |                |       |        |        |                         |     |       |       |    |    |    |   |   |   |   |  |
| SGO_0585                                                | 2.877      | 8.679 | 0.0002 | 0.0002 | 0.921      | 7.164 | 0.0065 | 0.0193 | 0.528        | 6.916 | 0.0092 | 0.0570 | -1.956      | 8.313 | 0.0004 | 0.0004 | -2.349        | 7.628 | 0.0004 | 0.0002 | -0.393         | 6.850 | 0.0426 | 0.0898 |                         |     |       |       |    |    |    |   |   |   |   |  |
| pepC; aminopeptidase C                                  |            |       |        |        |            |       |        |        |              |       |        |        |             |       |        |        |               |       |        |        |                |       |        |        |                         |     |       |       |    |    |    |   |   |   |   |  |
| SGO_0586                                                | -1.742     | 8.755 | 0.0002 | 0.0001 | -1.402     | 8.842 | 0.0003 | 0.0003 | -1.931       | 8.713 | 0.0001 | 0.0001 | 0.341       | 7.309 | 0.0144 | 0.0754 | -0.188        | 6.424 | 0.0303 | 0.1667 | -0.529         | 7.227 | 0.0163 | 0.0197 |                         |     |       |       |    |    |    |   |   |   |   |  |
| pbp1a; penicillin-binding protein 1A                    |            |       |        |        |            |       |        |        |              |       |        |        |             |       |        |        |               |       |        |        |                |       |        |        |                         |     |       |       |    |    |    |   |   |   |   |  |
| SGO_0589                                                | 1.676      | 7.845 | 0.0038 | 0.0113 | 1.105      | 7.429 | 0.0068 | 0.0204 | 0.840        | 7.241 | 0.0028 | 0.0124 | -0.571      | 7.688 | 0.0196 | 0.1119 | -0.835        | 6.970 | 0.0101 | 0.0417 | -0.265         | 7.239 | 0.0979 | 0.2806 |                         |     |       |       |    |    |    |   |   |   |   |  |
| methylase                                               |            |       |        |        |            |       |        |        |              |       |        |        |             |       |        |        |               |       |        |        |                |       |        |        |                         |     |       |       |    |    |    |   |   |   |   |  |
| SGO_0590                                                | 0.366      | 6.294 | 0.0250 | 0.1225 | -0.529     | 5.876 | 0.0308 | 0.1271 | -1.104       | 5.408 | 0.0263 | 0.2109 | -0.895      | 5.577 | 0.0044 | 0.0159 | -1.470        | 4.571 | 0.0188 | 0.0905 | -0.575         | 4.491 | 0.1229 | 0.3763 |                         |     |       |       |    |    |    |   |   |   |   |  |
| Methyltransferase                                       |            |       |        |        |            |       |        |        |              |       |        |        |             |       |        |        |               |       |        |        |                |       |        |        |                         |     |       |       |    |    |    |   |   |   |   |  |
| SGO_0591                                                | -2.414     | 8.988 | 0.0000 | 0.0000 | -2.495     | 8.975 | 0.0000 | 0.0000 | -3.040       | 8.906 | 0.0000 | 0.0000 | -0.081      | 6.773 | 0.0005 | 0.0005 | -0.626        | 5.925 | 0.0013 | 0.0021 | -0.545         | 6.487 | 0.0058 | 0.0034 |                         |     |       |       |    |    |    |   |   |   |   |  |
| hypothetical protein SGO_0591                           |            |       |        |        |            |       |        |        |              |       |        |        |             |       |        |        |               |       |        |        |                |       |        |        |                         |     |       |       |    |    |    |   |   |   |   |  |
| SGO_0592                                                | 0.770      | 5.593 | 0.0015 | 0.0034 | 1.171      | 5.856 | 0.0003 | 0.0002 | 0.243        | 4.825 | 0.0276 | 0.2220 | 0.401       | 5.626 | 0.0027 | 0.0078 | -0.527        | 4.232 | 0.0281 | 0.1510 | -0.928         | 5.148 | 0.0264 | 0.0438 |                         |     |       |       |    |    |    |   |   |   |   |  |
| luxS; autoinducer-2 production protein LuxS             |            |       |        |        |            |       |        |        |              |       |        |        |             |       |        |        |               |       |        |        |                |       |        |        |                         |     |       |       |    |    |    |   |   |   |   |  |

Show detected proteins only  
 Show all proteins

Filter by category:

Proteins found:  
1179

Dot Plots  
Dot Plots

Test Cutoff

q-Value p-Value

.005

| Signif | Direction | Applies To   |
|--------|-----------|--------------|
| yes    | +         | ratios, bars |
| no     | n/a       | bars         |
| yes    | -         | ratios, bars |
| yes    | +         | p-, q-Values |
| yes    | -         | p-, q-Values |

SgFn vs Sg — — SgPg vs Sg  
SgPgFn vs Sg — — SgPg vs SgFn  
SgPgFn vs SgFn — — SgPgFn vs SgPg

Summary Table SgFn vs Sg SgPg vs Sg SgPgFn vs Sg SgPg v SgFn SgPgFn v SgFn SgPgFn vs SgPg Coverage

| Protein                                                                                                          | SgFn vs Sg |       |        |        | SgPg vs Sg |       |        |        | SgPgFn vs Sg |       |        |        | SgPg v SgFn |       |        |        | SgPgFn v SgFn |       |        |        | SgPgFn vs SgPg |       |        |        | Log <sub>2</sub> Ratios |     |       |       |    |    |    |   |   |   |   |  |
|------------------------------------------------------------------------------------------------------------------|------------|-------|--------|--------|------------|-------|--------|--------|--------------|-------|--------|--------|-------------|-------|--------|--------|---------------|-------|--------|--------|----------------|-------|--------|--------|-------------------------|-----|-------|-------|----|----|----|---|---|---|---|--|
|                                                                                                                  | Ratio      | Sum   | q-Val  | p-Val  | Ratio      | Sum   | q-Val  | p-Val  | Ratio        | Sum   | q-Val  | p-Val  | Ratio       | Sum   | q-Val  | p-Val  | Ratio         | Sum   | q-Val  | p-Val  | Ratio          | Sum   | q-Val  | p-Val  | Ratio                   | Sum | q-Val | p-Val | -6 | -4 | -2 | 0 | 2 | 4 | 6 |  |
| <b>SGO_0593</b><br>HD/KH domain protein                                                                          | -3.236     | 8.876 | 0.0001 | 0.0000 | -2.047     | 9.043 | 0.0002 | 0.0001 | -2.992       | 8.903 | 0.0001 | 0.0001 | 1.189       | 6.701 | 0.0013 | 0.0027 | 0.245         | 5.513 | 0.0449 | 0.2657 | -0.945         | 6.782 | 0.0089 | 0.0068 |                         |     |       |       |    |    |    |   |   |   |   |  |
| <b>SGO_0594</b><br>gmk; Guanylate kinase (GMP kinase)                                                            | 0.562      | 6.622 | 0.0052 | 0.0169 | -0.071     | 6.280 | 0.1194 | 0.6001 | -0.356       | 6.147 | 0.0097 | 0.0616 | -0.633      | 6.078 | 0.0028 | 0.0086 | -0.918        | 5.361 | 0.0014 | 0.0025 | -0.285         | 5.592 | 0.0336 | 0.0621 |                         |     |       |       |    |    |    |   |   |   |   |  |
| <b>SGO_0595</b><br>DNA-directed RNA polymerase, omega subunit                                                    | -1.365     | 6.899 | 0.0004 | 0.0006 | -0.368     | 7.248 | 0.0003 | 0.0002 | -0.733       | 7.101 | 0.0004 | 0.0006 | 0.997       | 6.131 | 0.0011 | 0.0021 | 0.632         | 5.291 | 0.0054 | 0.0183 | -0.365         | 6.369 | 0.0086 | 0.0063 |                         |     |       |       |    |    |    |   |   |   |   |  |
| <b>SGO_0596</b><br>priA; primosomal protein N''                                                                  | 1.535      | 4.408 | 0.0093 | 0.0359 |            | 1.643 |        |        |              | 1.643 |        |        |             | 3.665 |        |        |               | 3.054 |        |        |                |       |        |        |                         |     |       |       |    |    |    |   |   |   |   |  |
| <b>SGO_0597</b><br>fmt; methionyl-tRNA formyltransferase                                                         | 2.095      | 6.308 | 0.0012 | 0.0024 | 1.413      | 5.785 | 0.0025 | 0.0057 | 0.482        | 5.192 | 0.0290 | 0.2349 | -0.682      | 6.173 | 0.0032 | 0.0104 | -1.613        | 5.275 | 0.0013 | 0.0022 | -0.930         | 5.400 | 0.0057 | 0.0031 |                         |     |       |       |    |    |    |   |   |   |   |  |
| <b>SGO_0598</b><br>sun; sun protein                                                                              | 0.617      | 4.435 | 0.0067 | 0.0238 | 0.767      | 5.065 | 0.0098 | 0.0324 |              | 3.614 |        |        | 0.150       | 4.423 | 0.0894 | 0.6563 |               | 2.107 |        |        |                | 3.895 |        |        |                         |     |       |       |    |    |    |   |   |   |   |  |
| <b>SGO_0599</b><br>phosphoprotein phosphatase                                                                    | 1.085      | 7.939 | 0.0005 | 0.0006 | -0.624     | 7.019 | 0.0012 | 0.0022 | -0.816       | 6.954 | 0.0019 | 0.0077 | -1.709      | 7.255 | 0.0004 | 0.0003 | -1.901        | 6.606 | 0.0006 | 0.0005 | -0.192         | 6.080 | 0.1225 | 0.3743 |                         |     |       |       |    |    |    |   |   |   |   |  |
| <b>SGO_0600</b><br>serine/threonine protein kinase                                                               | -2.104     | 8.114 | 0.0001 | 0.0001 | -2.409     | 8.059 | 0.0001 | 0.0000 | -3.243       | 7.883 | 0.0037 | 0.0182 | -0.306      | 6.059 | 0.0240 | 0.1406 | -1.139        | 4.891 | 0.0315 | 0.1751 | -0.833         | 5.248 | 0.0549 | 0.1291 |                         |     |       |       |    |    |    |   |   |   |   |  |
| <b>SGO_0602</b><br>histidine kinase                                                                              |            | 4.115 |        |        |            | 4.115 |        |        |              | 4.115 |        |        |             |       |        |        |               |       |        |        |                |       |        |        |                         |     |       |       |    |    |    |   |   |   |   |  |
| <b>SGO_0603</b><br>response regulator                                                                            | 0.459      | 5.665 | 0.0023 | 0.0062 | -0.916     | 5.074 | 0.0148 | 0.0537 |              | 4.419 |        |        | -1.375      | 4.866 | 0.0031 | 0.0096 |               | 3.751 |        |        |                | 3.106 |        |        |                         |     |       |       |    |    |    |   |   |   |   |  |
| <b>SGO_0604</b><br>hydrolase, haloacid dehalogenase family/peptidyl-prolyl cis-trans isomerase, cyclophilin type | 1.785      | 8.952 | 0.0001 | 0.0001 | 0.579      | 8.119 | 0.0028 | 0.0068 | 0.298        | 7.959 | 0.0102 | 0.0659 | -1.206      | 8.588 | 0.0001 | 0.0000 | -1.487        | 7.899 | 0.0001 | 0.0000 | -0.281         | 7.730 | 0.0121 | 0.0124 |                         |     |       |       |    |    |    |   |   |   |   |  |
| <b>SGO_0606</b><br>cysK; cysteine synthase A                                                                     | -0.606     | 9.178 | 0.0004 | 0.0005 | -0.319     | 9.299 | 0.0034 | 0.0086 | -0.436       | 9.248 | 0.0006 | 0.0014 | 0.287       | 8.481 | 0.0032 | 0.0103 | 0.171         | 7.806 | 0.0019 | 0.0043 | -0.116         | 8.560 | 0.0452 | 0.0978 |                         |     |       |       |    |    |    |   |   |   |   |  |
| <b>SGO_0608</b><br>comFA; competence ComFA-like protein                                                          |            | 4.069 |        |        |            | 4.069 |        |        |              | 4.069 |        |        |             |       |        |        |               |       |        |        |                |       |        |        |                         |     |       |       |    |    |    |   |   |   |   |  |
| <b>SGO_0610</b><br>ribosomal subunit interface protein                                                           | 1.162      | 8.870 | 0.0022 | 0.0058 | 0.727      | 8.578 | 0.0016 | 0.0031 | 0.525        | 8.478 | 0.0148 | 0.1065 | -0.434      | 8.621 | 0.0095 | 0.0444 | -0.637        | 7.943 | 0.0136 | 0.0613 | -0.202         | 8.303 | 0.1450 | 0.4632 |                         |     |       |       |    |    |    |   |   |   |   |  |
| <b>SGO_0626</b><br>recX; Regulatory protein recX                                                                 | -1.694     | 5.610 | 0.0047 | 0.0149 | -1.293     | 5.901 | 0.0004 | 0.0005 | -1.685       | 5.612 | 0.0032 | 0.0150 | 0.400       | 4.071 | 0.0495 | 0.3347 | 0.009         | 2.590 |        |        | -0.391         | 4.073 | 0.1141 | 0.3401 |                         |     |       |       |    |    |    |   |   |   |   |  |
| <b>SGO_0628</b><br>ymdC; 3''-aminoglycoside phosphotransferase-like protein (kanamycin kinase)                   |            | 1.322 |        |        |            | 1.322 |        |        |              | 1.322 |        |        |             |       |        |        |               |       |        |        |                |       |        |        |                         |     |       |       |    |    |    |   |   |   |   |  |

Show detected proteins only  
 Show all proteins

Proteins found:  
1179

Dot Plots  
Dot Plots

Test

Cutoff

q-Value

p-Value

.005

| Signif | Direction | Applies To   |
|--------|-----------|--------------|
| yes    | +         | ratios, bars |
| no     | n/a       | bars         |
| yes    | -         | ratios, bars |
| yes    | +         | p-, q-Values |
| yes    | -         | p-, q-Values |

SgFn vs Sg — — SgPg vs Sg  
SgPgFn vs Sg — — SgPg v SgFn  
SgPgFn vs SgFn — — SgPgFn vs SgPg

Summary Table SgFn vs Sg SgPg vs Sg SgPgFn vs Sg SgPg v SgFn SgPgFn v SgFn SgPgFn vs SgPg Coverage

| Protein                                                                         | SgFn vs Sg    |       |               |        | SgPg vs Sg    |       |               |        | SgPgFn vs Sg  |       |               |        | SgPg v SgFn   |       |               |        | SgPgFn v SgFn |       |               |        | SgPgFn vs SgPg |       |               |        | Log <sub>2</sub> Ratios |     |       |       |    |    |    |   |   |   |   |  |
|---------------------------------------------------------------------------------|---------------|-------|---------------|--------|---------------|-------|---------------|--------|---------------|-------|---------------|--------|---------------|-------|---------------|--------|---------------|-------|---------------|--------|----------------|-------|---------------|--------|-------------------------|-----|-------|-------|----|----|----|---|---|---|---|--|
|                                                                                 | Ratio         | Sum   | q-Val         | p-Val  | Ratio         | Sum   | q-Val         | p-Val  | Ratio         | Sum   | q-Val         | p-Val  | Ratio         | Sum   | q-Val         | p-Val  | Ratio         | Sum   | q-Val         | p-Val  | Ratio          | Sum   | q-Val         | p-Val  | Ratio                   | Sum | q-Val | p-Val | -6 | -4 | -2 | 0 | 2 | 4 | 6 |  |
| <b>SGO_0629</b>                                                                 |               | 3.342 |               |        | -0.706        | 3.714 | 0.0791        | 0.3819 |               | 3.342 |               |        |               | 1.063 |               |        |               |       |               |        |                | 1.063 |               |        |                         |     |       |       |    |    |    |   |   |   |   |  |
| rumA-1; 23S rRNA (uracil-5-)-methyltransferase RumA                             |               |       |               |        |               |       |               |        |               |       |               |        |               |       |               |        |               |       |               |        |                |       |               |        |                         |     |       |       |    |    |    |   |   |   |   |  |
| <b>SGO_0631</b>                                                                 | 0.803         | 3.099 |               |        | 3.710         | 6.407 | 0.0052        | 0.0151 | 2.433         | 5.206 | 0.0084        | 0.0510 | <b>2.906</b>  | 5.932 | <b>0.0044</b> | 0.0161 | 1.630         | 4.171 | 0.0136        | 0.0613 | <b>-1.276</b>  | 6.339 | <b>0.0012</b> | 0.0001 |                         |     |       |       |    |    |    |   |   |   |   |  |
| alpha-glycerophosphate oxidase                                                  |               |       |               |        |               |       |               |        |               |       |               |        |               |       |               |        |               |       |               |        |                |       |               |        |                         |     |       |       |    |    |    |   |   |   |   |  |
| <b>SGO_0632</b>                                                                 |               |       |               |        | 5.243         |       |               |        | 4.816         |       |               |        | 4.730         |       |               |        | 3.692         |       |               |        | -0.428         | 5.532 | 0.0101        | 0.0091 |                         |     |       |       |    |    |    |   |   |   |   |  |
| glpK; glycerol kinase                                                           |               |       |               |        |               |       |               |        |               |       |               |        |               |       |               |        |               |       |               |        |                |       |               |        |                         |     |       |       |    |    |    |   |   |   |   |  |
| <b>SGO_0635</b>                                                                 | 1.553         | 3.976 |               |        | 2.000         |       |               |        | 2.000         |       |               |        | 3.039         |       |               |        | 2.429         |       |               |        |                |       |               |        |                         |     |       |       |    |    |    |   |   |   |   |  |
| hypothetical protein SGO_0635                                                   |               |       |               |        |               |       |               |        |               |       |               |        |               |       |               |        |               |       |               |        |                |       |               |        |                         |     |       |       |    |    |    |   |   |   |   |  |
| <b>SGO_0636</b>                                                                 |               | 2.930 |               |        | 2.930         |       |               |        | 2.930         |       |               |        |               |       |               |        |               |       |               |        |                |       |               |        |                         |     |       |       |    |    |    |   |   |   |   |  |
| hypothetical protein SGO_0636                                                   |               |       |               |        |               |       |               |        |               |       |               |        |               |       |               |        |               |       |               |        |                |       |               |        |                         |     |       |       |    |    |    |   |   |   |   |  |
| <b>SGO_0639</b>                                                                 | 0.072         | 8.074 | 0.0676        | 0.4110 | <b>0.402</b>  | 8.251 | <b>0.0020</b> | 0.0044 | -0.081        | 8.001 | 0.0655        | 0.5956 | 0.330         | 7.771 | 0.0060        | 0.0237 | -0.153        | 6.917 | 0.0555        | 0.3511 | -0.483         | 7.708 | 0.0168        | 0.0211 |                         |     |       |       |    |    |    |   |   |   |   |  |
| valS; valyl-tRNA synthetase                                                     |               |       |               |        |               |       |               |        |               |       |               |        |               |       |               |        |               |       |               |        |                |       |               |        |                         |     |       |       |    |    |    |   |   |   |   |  |
| <b>SGO_0640</b>                                                                 |               | 3.285 |               |        | -0.116        | 4.207 | 0.1194        | 0.5995 | 2.061         | 4.870 | 0.0095        | 0.0595 |               | 2.612 |               |        |               | 3.162 |               |        | 2.176          | 4.306 | 0.0195        | 0.0266 |                         |     |       |       |    |    |    |   |   |   |   |  |
| modification methylase                                                          |               |       |               |        |               |       |               |        |               |       |               |        |               |       |               |        |               |       |               |        |                |       |               |        |                         |     |       |       |    |    |    |   |   |   |   |  |
| <b>SGO_0641</b>                                                                 | 0.022         | 6.939 | 0.1313        | 0.8744 | 0.103         | 6.975 | 0.0807        | 0.3916 | <b>-0.590</b> | 6.661 | <b>0.0043</b> | 0.0221 | 0.081         | 6.473 | 0.0774        | 0.5594 | -0.612        | 5.552 | 0.0071        | 0.0258 | -0.693         | 6.206 | 0.0057        | 0.0032 |                         |     |       |       |    |    |    |   |   |   |   |  |
| ATPase, histidine kinase-, DNA gyrase B-, and HSP90-like domain protein protein |               |       |               |        |               |       |               |        |               |       |               |        |               |       |               |        |               |       |               |        |                |       |               |        |                         |     |       |       |    |    |    |   |   |   |   |  |
| <b>SGO_0642</b>                                                                 | <b>-1.789</b> | 6.945 | <b>0.0020</b> | 0.0050 | <b>-1.357</b> | 7.044 | <b>0.0027</b> | 0.0063 | <b>1.284</b>  | 8.338 | <b>0.0006</b> | 0.0014 | 0.432         | 5.530 | 0.0425        | 0.2821 | <b>3.073</b>  | 6.884 | <b>0.0005</b> | 0.0003 | <b>2.641</b>   | 7.544 | <b>0.0019</b> | 0.0003 |                         |     |       |       |    |    |    |   |   |   |   |  |
| hypothetical protein SGO_0642                                                   |               |       |               |        |               |       |               |        |               |       |               |        |               |       |               |        |               |       |               |        |                |       |               |        |                         |     |       |       |    |    |    |   |   |   |   |  |
| <b>SGO_0643</b>                                                                 | <b>0.835</b>  | 5.351 | <b>0.0028</b> | 0.0078 | -0.367        | 4.720 | 0.0490        | 0.2176 | -0.469        | 4.323 | 0.0371        | 0.3127 | <b>-1.201</b> | 4.722 | <b>0.0021</b> | 0.0051 | -1.303        | 3.846 | 0.0181        | 0.0853 | -0.102         | 3.563 | 0.2074        | 0.7545 |                         |     |       |       |    |    |    |   |   |   |   |  |
| cytosine-specific methyltransferase                                             |               |       |               |        |               |       |               |        |               |       |               |        |               |       |               |        |               |       |               |        |                |       |               |        |                         |     |       |       |    |    |    |   |   |   |   |  |
| <b>SGO_0644</b>                                                                 | -0.099        | 5.966 | 0.0866        | 0.5505 | <b>1.368</b>  | 6.862 | <b>0.0033</b> | 0.0081 | <b>0.731</b>  | 6.424 | <b>0.0024</b> | 0.0102 | <b>1.467</b>  | 6.326 | <b>0.0028</b> | 0.0083 | <b>0.830</b>  | 5.269 | <b>0.0045</b> | 0.0138 | -0.638         | 6.594 | 0.0262        | 0.0428 |                         |     |       |       |    |    |    |   |   |   |   |  |
| hypothetical protein SGO_0644                                                   |               |       |               |        |               |       |               |        |               |       |               |        |               |       |               |        |               |       |               |        |                |       |               |        |                         |     |       |       |    |    |    |   |   |   |   |  |
| <b>SGO_0649</b>                                                                 |               | 2.322 |               |        | 2.322         |       |               |        | 2.322         |       |               |        |               |       |               |        |               |       |               |        |                |       |               |        |                         |     |       |       |    |    |    |   |   |   |   |  |
| hypothetical protein SGO_0649                                                   |               |       |               |        |               |       |               |        |               |       |               |        |               |       |               |        |               |       |               |        |                |       |               |        |                         |     |       |       |    |    |    |   |   |   |   |  |
| <b>SGO_0652</b>                                                                 | <b>-3.825</b> | 7.262 | <b>0.0001</b> | 0.0000 | <b>-3.768</b> | 7.285 | <b>0.0002</b> | 0.0001 | <b>-3.269</b> | 7.309 | <b>0.0001</b> | 0.0000 | 0.057         | 3.991 | 0.0810        | 0.5877 | 0.556         | 3.540 | 0.0164        | 0.0761 | 0.499          | 4.282 | 0.1697        | 0.5840 |                         |     |       |       |    |    |    |   |   |   |   |  |
| hypothetical protein SGO_0652                                                   |               |       |               |        |               |       |               |        |               |       |               |        |               |       |               |        |               |       |               |        |                |       |               |        |                         |     |       |       |    |    |    |   |   |   |   |  |
| <b>SGO_0653</b>                                                                 |               | 3.322 |               |        | -0.400        | 4.660 | 0.0528        | 0.2379 | 3.322         |       |               |        | 3.420         |       |               |        |               |       |               |        |                |       |               |        |                         |     |       |       |    |    |    |   |   |   |   |  |
| conserved hypothetical protein of unknown function (DUF1027)                    |               |       |               |        |               |       |               |        |               |       |               |        |               |       |               |        |               |       |               |        |                |       |               |        |                         |     |       |       |    |    |    |   |   |   |   |  |
| <b>SGO_0654</b>                                                                 | -3.313        | 7.518 | 0.0183        | 0.0826 | <b>-0.815</b> | 8.095 | <b>0.0039</b> | 0.0102 | <b>-1.356</b> | 7.923 | <b>0.0011</b> | 0.0036 | 2.498         | 6.237 | 0.0141        | 0.0739 | 1.957         | 5.141 | 0.0205        | 0.1015 | -0.541         | 6.872 | 0.0183        | 0.0237 |                         |     |       |       |    |    |    |   |   |   |   |  |
| radical SAM enzyme, Cfr family                                                  |               |       |               |        |               |       |               |        |               |       |               |        |               |       |               |        |               |       |               |        |                |       |               |        |                         |     |       |       |    |    |    |   |   |   |   |  |
| <b>SGO_0656</b>                                                                 | 0.786         | 6.720 | 0.0347        | 0.1846 | <b>-0.846</b> | 5.780 | <b>0.0012</b> | 0.0020 | -0.917        | 5.799 | 0.0092        | 0.0574 | -1.633        | 5.978 | 0.0164        | 0.0904 | -1.703        | 5.379 | 0.0202        | 0.0985 | -0.070         | 4.817 | 0.2354        | 0.8955 |                         |     |       |       |    |    |    |   |   |   |   |  |
| trpB-2; tryptophan synthase, beta subunit                                       |               |       |               |        |               |       |               |        |               |       |               |        |               |       |               |        |               |       |               |        |                |       |               |        |                         |     |       |       |    |    |    |   |   |   |   |  |

Show detected proteins only  
 Show all proteins

Proteins found:  
1179

Dot Plots  
Dot Plots

Test

Cutoff

q-Value

p-Value

.005

| Signif | Direction | Applies To   |
|--------|-----------|--------------|
| yes    | +         | ratios, bars |
| no     | n/a       | bars         |
| yes    | -         | ratios, bars |
| yes    | +         | p-, q-Values |
| yes    | -         | p-, q-Values |

SgFn vs Sg — SgPg vs Sg  
SgPgFn vs Sg — SgPg vs SgFn  
SgPgFn vs SgFn — SgPgFn vs SgPg

Summary Table SgFn vs Sg SgPg vs Sg SgPgFn vs Sg SgPg v SgFn SgPgFn v SgFn SgPgFn vs SgPg Coverage

| Protein                                                                | SgFn vs Sg |        |        |        | SgPg vs Sg |        |        |        | SgPgFn vs Sg |        |        |        | SgPg v SgFn |       |        |        | SgPgFn v SgFn |       |        |        | SgPgFn vs SgPg |       |        |        | Log <sub>2</sub> Ratios |     |       |       |    |    |    |   |   |   |   |  |
|------------------------------------------------------------------------|------------|--------|--------|--------|------------|--------|--------|--------|--------------|--------|--------|--------|-------------|-------|--------|--------|---------------|-------|--------|--------|----------------|-------|--------|--------|-------------------------|-----|-------|-------|----|----|----|---|---|---|---|--|
|                                                                        | Ratio      | Sum    | q-Val  | p-Val  | Ratio      | Sum    | q-Val  | p-Val  | Ratio        | Sum    | q-Val  | p-Val  | Ratio       | Sum   | q-Val  | p-Val  | Ratio         | Sum   | q-Val  | p-Val  | Ratio          | Sum   | q-Val  | p-Val  | Ratio                   | Sum | q-Val | p-Val | -6 | -4 | -2 | 0 | 2 | 4 | 6 |  |
| SGO_0657                                                               |            | 1.322  |        |        |            | 1.322  |        |        |              | 1.322  |        |        |             |       |        |        |               |       |        |        |                |       |        |        |                         |     |       |       |    |    |    |   |   |   |   |  |
| trpE; anthranilate synthase component I                                |            |        |        |        |            |        |        |        |              |        |        |        |             |       |        |        |               |       |        |        |                |       |        |        |                         |     |       |       |    |    |    |   |   |   |   |  |
| SGO_0662                                                               | 1.838      | 4.612  | 0.0045 | 0.0139 |            | 1.585  |        |        |              | 1.585  |        |        |             | 3.910 |        |        |               | 3.299 |        |        |                |       |        |        |                         |     |       |       |    |    |    |   |   |   |   |  |
| trpB-1; tryptophan synthase, beta subunit                              |            |        |        |        |            |        |        |        |              |        |        |        |             |       |        |        |               |       |        |        |                |       |        |        |                         |     |       |       |    |    |    |   |   |   |   |  |
| SGO_0663                                                               |            | 1.000  |        |        |            | 1.000  |        |        |              | 1.000  |        |        |             |       |        |        |               |       |        |        |                |       |        |        |                         |     |       |       |    |    |    |   |   |   |   |  |
| trpA-2; tryptophan synthase, alpha subunit                             |            |        |        |        |            |        |        |        |              |        |        |        |             |       |        |        |               |       |        |        |                |       |        |        |                         |     |       |       |    |    |    |   |   |   |   |  |
| SGO_0665                                                               | -0.806     | 10.143 | 0.0079 | 0.0292 | -0.422     | 10.290 | 0.0218 | 0.0858 | -0.506       | 10.265 | 0.0144 | 0.1037 | 0.384       | 9.366 | 0.0119 | 0.0585 | 0.300         | 8.721 | 0.0397 | 0.2299 | -0.084         | 9.511 | 0.2049 | 0.7441 |                         |     |       |       |    |    |    |   |   |   |   |  |
| non-heme iron-containing ferritin                                      |            |        |        |        |            |        |        |        |              |        |        |        |             |       |        |        |               |       |        |        |                |       |        |        |                         |     |       |       |    |    |    |   |   |   |   |  |
| SGO_0667                                                               |            | 4.807  |        |        | -1.961     | 5.142  | 0.0011 | 0.0019 |              | 4.807  |        |        |             | 2.360 |        |        |               |       |        |        |                | 2.360 |        |        |                         |     |       |       |    |    |    |   |   |   |   |  |
| rhodanese family protein                                               |            |        |        |        |            |        |        |        |              |        |        |        |             |       |        |        |               |       |        |        |                |       |        |        |                         |     |       |       |    |    |    |   |   |   |   |  |
| SGO_0669                                                               | 0.790      | 8.186  | 0.0019 | 0.0045 | 0.694      | 8.122  | 0.0002 | 0.0001 | 0.640        | 8.090  | 0.0006 | 0.0015 | -0.097      | 7.966 | 0.0429 | 0.2855 | -0.151        | 7.331 | 0.0325 | 0.1814 | -0.054         | 7.888 | 0.0984 | 0.2826 |                         |     |       |       |    |    |    |   |   |   |   |  |
| typA; GTP-binding protein TypA                                         |            |        |        |        |            |        |        |        |              |        |        |        |             |       |        |        |               |       |        |        |                |       |        |        |                         |     |       |       |    |    |    |   |   |   |   |  |
| SGO_0671                                                               | 1.635      | 7.976  | 0.0003 | 0.0004 | 0.437      | 7.176  | 0.0084 | 0.0267 | -0.744       | 6.613  | 0.0005 | 0.0010 | -1.199      | 7.584 | 0.0008 | 0.0012 | -2.380        | 6.703 | 0.0004 | 0.0002 | -1.181         | 6.393 | 0.0058 | 0.0033 |                         |     |       |       |    |    |    |   |   |   |   |  |
| murD; UDP-N-acetylmuramoylalanine--D-glutamate ligase                  |            |        |        |        |            |        |        |        |              |        |        |        |             |       |        |        |               |       |        |        |                |       |        |        |                         |     |       |       |    |    |    |   |   |   |   |  |
| SGO_0672                                                               | -0.119     | 7.180  | 0.0814 | 0.5114 | -1.494     | 6.719  | 0.0073 | 0.0224 | -3.241       | 6.316  | 0.0161 | 0.1181 | -1.375      | 6.114 | 0.0055 | 0.0216 | -3.122        | 5.069 | 0.0180 | 0.0847 | -1.747         | 4.555 | 0.1156 | 0.3479 |                         |     |       |       |    |    |    |   |   |   |   |  |
| murG; undecaprenyl-PP-MurNAc-pentapeptide-UDPGlcNAc GlcNAc transferase |            |        |        |        |            |        |        |        |              |        |        |        |             |       |        |        |               |       |        |        |                |       |        |        |                         |     |       |       |    |    |    |   |   |   |   |  |
| SGO_0673                                                               | -1.650     | 6.736  | 0.0020 | 0.0049 | -2.932     | 6.419  | 0.0241 | 0.0961 | -2.920       | 6.420  | 0.0136 | 0.0962 | -1.282      | 4.462 | 0.0387 | 0.2526 | -1.270        | 3.853 | 0.0431 | 0.2539 | 0.012          | 2.877 |        |        |                         |     |       |       |    |    |    |   |   |   |   |  |
| DivIB; cell division protein DivIB                                     |            |        |        |        |            |        |        |        |              |        |        |        |             |       |        |        |               |       |        |        |                |       |        |        |                         |     |       |       |    |    |    |   |   |   |   |  |
| SGO_0674                                                               | 0.569      | 9.226  | 0.0003 | 0.0004 | 0.359      | 9.105  | 0.0012 | 0.0021 | 0.429        | 9.145  | 0.0011 | 0.0037 | -0.210      | 8.869 | 0.0037 | 0.0120 | -0.140        | 8.291 | 0.0145 | 0.0659 | 0.070          | 8.796 | 0.0972 | 0.2773 |                         |     |       |       |    |    |    |   |   |   |   |  |
| ftsA; cell division protein FtsA                                       |            |        |        |        |            |        |        |        |              |        |        |        |             |       |        |        |               |       |        |        |                |       |        |        |                         |     |       |       |    |    |    |   |   |   |   |  |
| SGO_0675                                                               | 0.657      | 9.878  | 0.0130 | 0.0548 | 0.507      | 9.775  | 0.0084 | 0.0266 | 0.860        | 9.992  | 0.0013 | 0.0044 | -0.149      | 9.573 | 0.0515 | 0.3515 | 0.204         | 9.139 | 0.0478 | 0.2859 | 0.353          | 9.672 | 0.0028 | 0.0006 |                         |     |       |       |    |    |    |   |   |   |   |  |
| ftsZ; cell division protein FtsZ                                       |            |        |        |        |            |        |        |        |              |        |        |        |             |       |        |        |               |       |        |        |                |       |        |        |                         |     |       |       |    |    |    |   |   |   |   |  |
| SGO_0676                                                               | -0.268     | 5.946  | 0.0808 | 0.5048 | 0.129      | 6.116  | 0.1080 | 0.5380 | -0.086       | 5.997  | 0.0553 | 0.4930 | 0.397       | 5.507 | 0.0465 | 0.3128 | 0.182         | 4.768 | 0.0997 | 0.6987 | -0.215         | 5.555 | 0.0878 | 0.2400 |                         |     |       |       |    |    |    |   |   |   |   |  |
| conserved hypothetical protein TIGR00044                               |            |        |        |        |            |        |        |        |              |        |        |        |             |       |        |        |               |       |        |        |                |       |        |        |                         |     |       |       |    |    |    |   |   |   |   |  |
| SGO_0677                                                               | -0.741     | 8.345  | 0.0045 | 0.0138 | -0.679     | 8.372  | 0.0077 | 0.0236 | -0.787       | 8.346  | 0.0071 | 0.0406 | 0.062       | 7.443 | 0.0778 | 0.5626 | -0.046        | 6.798 | 0.1359 | 0.9911 | -0.108         | 7.445 | 0.2139 | 0.7877 |                         |     |       |       |    |    |    |   |   |   |   |  |
| ylmF protein                                                           |            |        |        |        |            |        |        |        |              |        |        |        |             |       |        |        |               |       |        |        |                |       |        |        |                         |     |       |       |    |    |    |   |   |   |   |  |
| SGO_0680                                                               | 0.018      | 8.598  | 0.1210 | 0.7945 | 0.819      | 9.042  | 0.0017 | 0.0035 | 0.360        | 8.769  | 0.0084 | 0.0506 | 0.801       | 8.548 | 0.0049 | 0.0186 | 0.341         | 7.668 | 0.0356 | 0.2039 | -0.460         | 8.674 | 0.0226 | 0.0338 |                         |     |       |       |    |    |    |   |   |   |   |  |
| cell division protein DivIVA                                           |            |        |        |        |            |        |        |        |              |        |        |        |             |       |        |        |               |       |        |        |                |       |        |        |                         |     |       |       |    |    |    |   |   |   |   |  |
| SGO_0681                                                               | -0.268     | 8.346  | 0.0217 | 0.1021 | 0.809      | 8.932  | 0.0014 | 0.0026 | 0.282        | 8.622  | 0.0122 | 0.0830 | 1.077       | 8.323 | 0.0001 | 0.0000 | 0.551         | 7.377 | 0.0007 | 0.0008 | -0.526         | 8.524 | 0.0026 | 0.0005 |                         |     |       |       |    |    |    |   |   |   |   |  |
| ileS; isoleucyl-tRNA synthetase                                        |            |        |        |        |            |        |        |        |              |        |        |        |             |       |        |        |               |       |        |        |                |       |        |        |                         |     |       |       |    |    |    |   |   |   |   |  |
| SGO_0684                                                               | 0.170      | 8.754  | 0.0141 | 0.0608 | -1.462     | 8.112  | 0.0000 | 0.0000 | -0.754       | 8.337  | 0.0001 | 0.0000 | -1.632      | 7.728 | 0.0004 | 0.0004 | -0.924        | 7.324 | 0.0010 | 0.0012 | 0.708          | 7.087 | 0.0016 | 0.0002 |                         |     |       |       |    |    |    |   |   |   |   |  |
| hypothetical protein SGO_0684                                          |            |        |        |        |            |        |        |        |              |        |        |        |             |       |        |        |               |       |        |        |                |       |        |        |                         |     |       |       |    |    |    |   |   |   |   |  |

Show detected proteins only  
 Show all proteins

Proteins found:  
1179

Dot Plots  
Dot Plots

Test

Cutoff

q-Value

p-Value

.005

| Signif | Direction | Applies To   |
|--------|-----------|--------------|
| yes    | +         | ratios, bars |
| no     | n/a       | bars         |
| yes    | -         | ratios, bars |
| yes    | +         | p-, q-Values |
| yes    | -         | p-, q-Values |

SgFn vs Sg —  
SgPgFn vs Sg —  
SgPgFn vs SgFn —  
SgPg vs SgPg —  
SgPg vs SgFn —  
SgPgFn vs SgPg —



| Protein                                                         | Summary Table |        | SgFn vs Sg |        | SgPg vs Sg    |        | SgPgFn vs Sg |        | SgPg v SgFn    |        | SgPgFn v SgFn  |        | SgPgFn vs SgPg          |        | Coverage |        | Log <sub>2</sub> Ratios |        |        |        |               |        |        |        |       |       |   |  |  |  |  |
|-----------------------------------------------------------------|---------------|--------|------------|--------|---------------|--------|--------------|--------|----------------|--------|----------------|--------|-------------------------|--------|----------|--------|-------------------------|--------|--------|--------|---------------|--------|--------|--------|-------|-------|---|--|--|--|--|
|                                                                 | SgFn vs Sg    |        | SgPg vs Sg |        | SgPgFn vs Sg  |        | SgPg vs SgFn |        | SgPgFn vs SgFn |        | SgPgFn vs SgPg |        | Log <sub>2</sub> Ratios |        |          |        |                         |        |        |        |               |        |        |        |       |       |   |  |  |  |  |
|                                                                 | Ratio         | Sum    | q-Val      | p-Val  | Ratio         | Sum    | q-Val        | p-Val  | Ratio          | Sum    | q-Val          | p-Val  | Ratio                   | Sum    | q-Val    | p-Val  | Ratio                   | Sum    | q-Val  | p-Val  | -6            | -4     | -2     | 0      | 2     | 4     | 6 |  |  |  |  |
| <b>SGO_0685</b>                                                 | 0.646         | 3.529  |            |        |               | 2.170  |              |        |                | 2.170  |                |        |                         | 2.302  |          |        |                         | 1.692  |        |        |               |        |        |        |       |       |   |  |  |  |  |
| MutT/nudix family protein                                       |               |        |            |        |               |        |              |        |                |        |                |        |                         |        |          |        |                         |        |        |        |               |        |        |        |       |       |   |  |  |  |  |
| <b>SGO_0688</b>                                                 | 0.228         | 8.363  | 0.0550     | 0.3181 | -0.104        | 8.168  | 0.0159       | 0.0586 | <b>-0.604</b>  | 7.948  | 0.0002         | 0.0003 | -0.332                  | 7.804  | 0.0336   | 0.2103 | -0.832                  | 6.996  | 0.0118 | 0.0511 | <b>-0.500</b> | 7.374  | 0.0031 | 0.0007 |       |       |   |  |  |  |  |
| ATP dependent Clp protease, ATP-binding subunit, ClpE           |               |        |            |        |               |        |              |        |                |        |                |        |                         |        |          |        |                         |        |        |        |               |        |        |        |       |       |   |  |  |  |  |
| <b>SGO_0689</b>                                                 |               | 3.170  |            |        |               | 3.170  |              |        |                | 3.170  |                |        |                         |        |          |        |                         |        |        |        |               |        |        |        |       |       |   |  |  |  |  |
| hypothetical protein SGO_0689                                   |               |        |            |        |               |        |              |        |                |        |                |        |                         |        |          |        |                         |        |        |        |               |        |        |        |       |       |   |  |  |  |  |
| <b>SGO_0690</b>                                                 | 1.809         | 5.251  | 0.0084     | 0.0320 | 0.338         | 3.866  | 0.1779       | 0.9520 |                | 3.260  |                |        | -1.471                  | 4.553  | 0.0349   | 0.2212 |                         | 3.709  |        |        |               |        |        |        | 1.807 |       |   |  |  |  |  |
| folD; methenyltetrahydrofolate cyclohydrolase                   |               |        |            |        |               |        |              |        |                |        |                |        |                         |        |          |        |                         |        |        |        |               |        |        |        |       |       |   |  |  |  |  |
| <b>SGO_0693</b>                                                 | 0.753         | 6.673  | 0.0237     | 0.1130 | <b>-2.268</b> | 5.513  | 0.0024       | 0.0053 | -2.019         | 5.369  | 0.0151         | 0.1091 | -3.021                  | 5.697  | 0.0055   | 0.0215 | -2.773                  | 4.999  | 0.0401 | 0.2338 | 0.248         | 3.226  | 0.2508 | 0.9789 |       |       |   |  |  |  |  |
| xseA; exodeoxyribonuclease VII, large subunit                   |               |        |            |        |               |        |              |        |                |        |                |        |                         |        |          |        |                         |        |        |        |               |        |        |        |       |       |   |  |  |  |  |
| <b>SGO_0694</b>                                                 |               | 3.248  |            |        | 0.972         | 4.814  |              |        |                | 3.248  |                |        |                         | 3.707  |          |        |                         |        |        |        |               |        |        |        |       | 3.707 |   |  |  |  |  |
| xseB; exodeoxyribonuclease VII, small subunit                   |               |        |            |        |               |        |              |        |                |        |                |        |                         |        |          |        |                         |        |        |        |               |        |        |        |       |       |   |  |  |  |  |
| <b>SGO_0695</b>                                                 |               | 2.931  |            |        |               | 3.321  |              |        |                |        |                |        | 0.389                   | 3.626  |          |        |                         | 1.807  |        |        |               |        |        |        | 2.807 |       |   |  |  |  |  |
| geranyltranstransferase                                         |               |        |            |        |               |        |              |        |                |        |                |        |                         |        |          |        |                         |        |        |        |               |        |        |        |       |       |   |  |  |  |  |
| <b>SGO_0696</b>                                                 |               | 3.029  |            |        |               | 3.029  |              |        |                | 3.029  |                |        |                         |        |          |        |                         |        |        |        |               |        |        |        |       |       |   |  |  |  |  |
| hemolysin-like protein                                          |               |        |            |        |               |        |              |        |                |        |                |        |                         |        |          |        |                         |        |        |        |               |        |        |        |       |       |   |  |  |  |  |
| <b>SGO_0697</b>                                                 |               | 2.339  |            |        | 0.936         | 3.253  | 0.0636       | 0.2947 |                | 2.339  |                |        |                         | 1.648  |          |        |                         |        |        |        |               |        |        |        | 1.648 |       |   |  |  |  |  |
| transcription regulator                                         |               |        |            |        |               |        |              |        |                |        |                |        |                         |        |          |        |                         |        |        |        |               |        |        |        |       |       |   |  |  |  |  |
| <b>SGO_0698</b>                                                 | <b>1.171</b>  | 6.257  | 0.0039     | 0.0118 | 0.402         | 5.779  | 0.0587       | 0.2686 |                | 4.604  |                |        | <b>-0.769</b>           | 5.857  | 0.0019   | 0.0043 |                         | 4.580  |        |        |               |        |        |        | 4.421 |       |   |  |  |  |  |
| recN; DNA repair protein RecN                                   |               |        |            |        |               |        |              |        |                |        |                |        |                         |        |          |        |                         |        |        |        |               |        |        |        |       |       |   |  |  |  |  |
| <b>SGO_0699</b>                                                 | <b>1.280</b>  | 5.382  | 0.0018     | 0.0043 | 0.342         | 4.783  | 0.0207       | 0.0805 |                | 3.609  |                |        | <b>-0.938</b>           | 4.974  | 0.0023   | 0.0060 |                         | 3.759  |        |        |               |        |        |        | 3.426 |       |   |  |  |  |  |
| Serine/threonine protein phosphatase                            |               |        |            |        |               |        |              |        |                |        |                |        |                         |        |          |        |                         |        |        |        |               |        |        |        |       |       |   |  |  |  |  |
| <b>SGO_0700</b>                                                 | -0.380        | 5.870  | 0.0479     | 0.2708 | 0.522         | 6.310  | 0.0140       | 0.0498 | -0.170         | 5.972  | 0.0741         | 0.6885 | 0.903                   | 5.663  | 0.0060   | 0.0237 | 0.210                   | 4.677  | 0.0820 | 0.5588 | -0.692        | 5.746  | 0.0354 | 0.0673 |       |       |   |  |  |  |  |
| DegV family protein                                             |               |        |            |        |               |        |              |        |                |        |                |        |                         |        |          |        |                         |        |        |        |               |        |        |        |       |       |   |  |  |  |  |
| <b>SGO_0701</b>                                                 | 0.805         | 12.498 | 0.0064     | 0.0221 | <b>1.056</b>  | 12.649 | 0.0002       | 0.0001 | <b>0.991</b>   | 12.614 | 0.0019         | 0.0078 | 0.251                   | 12.458 | 0.0282   | 0.1725 | 0.186                   | 11.819 | 0.0600 | 0.3839 | -0.065        | 12.543 | 0.1866 | 0.6611 |       |       |   |  |  |  |  |
| hup; DNA-binding histone-like protein HU                        |               |        |            |        |               |        |              |        |                |        |                |        |                         |        |          |        |                         |        |        |        |               |        |        |        |       |       |   |  |  |  |  |
| <b>SGO_0704</b>                                                 | <b>1.491</b>  | 10.896 | 0.0009     | 0.0016 | <b>1.791</b>  | 11.120 | 0.0004       | 0.0004 | <b>2.431</b>   | 11.636 | 0.0001         | 0.0001 | <b>0.300</b>            | 11.092 | 0.0038   | 0.0127 | <b>0.940</b>            | 10.868 | 0.0004 | 0.0002 | <b>0.640</b>  | 11.588 | 0.0012 | 0.0001 |       |       |   |  |  |  |  |
| gpmA; 2,3-bisphosphoglycerate-dependent phosphoglycerate mutase |               |        |            |        |               |        |              |        |                |        |                |        |                         |        |          |        |                         |        |        |        |               |        |        |        |       |       |   |  |  |  |  |
| <b>SGO_0705</b>                                                 |               | 1.807  |            |        |               | 1.807  |              |        |                | 1.807  |                |        |                         |        |          |        |                         |        |        |        |               |        |        |        |       |       |   |  |  |  |  |
| Protein of unknown function (DUF1250) superfamily               |               |        |            |        |               |        |              |        |                |        |                |        |                         |        |          |        |                         |        |        |        |               |        |        |        |       |       |   |  |  |  |  |
| <b>SGO_0706</b>                                                 | <b>2.946</b>  | 6.245  | 0.0001     | 0.0001 | <b>1.431</b>  | 5.021  | 0.0017       | 0.0035 | 1.279          | 4.295  | 0.0196         | 0.1513 | <b>-1.515</b>           | 5.980  | 0.0001   | 0.0000 | -1.667                  | 5.147  | 0.0054 | 0.0186 | -0.152        | 4.568  | 0.0575 | 0.1368 |       |       |   |  |  |  |  |
| phoH-like protein                                               |               |        |            |        |               |        |              |        |                |        |                |        |                         |        |          |        |                         |        |        |        |               |        |        |        |       |       |   |  |  |  |  |

Show detected proteins only  
 Show all proteins  
 Filter by category:

Proteins found:  
1179

Dot Plots  
 Dot Plots

**Test**      **Cutoff**  
     

| Signif | Direction | Applies To   |
|--------|-----------|--------------|
| yes    | +         | ratios, bars |
| no     | n/a       | bars         |
| yes    | -         | ratios, bars |
| yes    | +         | p-, q-Values |
| yes    | -         |              |

SgFn vs Sg — █      SgPg vs Sg — █  
 SgPgFn vs Sg — █      SgPg vs SgFn — █  
 SgPgFn vs SgFn — █      SgPgFn vs SgPg — █

Summary Table SgFn vs Sg SgPg vs Sg SgPgFn vs Sg SgPg v SgFn SgPgFn v SgFn SgPgFn vs SgPg Coverage

| Protein                                                                  | SgFn vs Sg |        |        |        | SgPg vs Sg |       |        |        | SgPgFn vs Sg |       |        |        | SgPg v SgFn |        |        |        | SgPgFn v SgFn |        |        |        | SgPgFn vs SgPg |       |        |        | Log <sub>2</sub> Ratios |     |       |       |    |    |    |   |   |   |   |  |
|--------------------------------------------------------------------------|------------|--------|--------|--------|------------|-------|--------|--------|--------------|-------|--------|--------|-------------|--------|--------|--------|---------------|--------|--------|--------|----------------|-------|--------|--------|-------------------------|-----|-------|-------|----|----|----|---|---|---|---|--|
|                                                                          | Ratio      | Sum    | q-Val  | p-Val  | Ratio      | Sum   | q-Val  | p-Val  | Ratio        | Sum   | q-Val  | p-Val  | Ratio       | Sum    | q-Val  | p-Val  | Ratio         | Sum    | q-Val  | p-Val  | Ratio          | Sum   | q-Val  | p-Val  | Ratio                   | Sum | q-Val | p-Val | -6 | -4 | -2 | 0 | 2 | 4 | 6 |  |
| <b>SGO_0707</b><br>LPXTG cell wall surface protein                       | 0.131      | 9.804  | 0.0405 | 0.2218 | -5.103     | 8.777 | 0.0000 | 0.0000 | -4.949       | 8.783 | 0.0000 | 0.0000 | -5.234      | 8.398  | 0.0005 | 0.0005 | -5.080        | 7.793  | 0.0006 | 0.0005 | 0.154          | 4.307 | 0.1982 | 0.7097 |                         |     |       |       |    |    |    |   |   |   |   |  |
| <b>SGO_0708</b><br>ald; alanine dehydrogenase                            | 3.041      | 11.420 | 0.0000 | 0.0000 | 0.702      | 9.607 | 0.0002 | 0.0001 | 0.711        | 9.617 | 0.0018 | 0.0071 | -2.339      | 11.001 | 0.0000 | 0.0000 | -2.330        | 10.393 | 0.0001 | 0.0000 | 0.009          | 9.410 | 0.2272 | 0.8553 |                         |     |       |       |    |    |    |   |   |   |   |  |
| <b>SGO_0711</b><br>conserved hypothetical protein TIGR00043              | 0.408      | 4.363  |        |        |            | 3.145 |        |        |              | 3.145 |        |        |             | 3.039  |        |        |               | 2.429  |        |        |                |       |        |        |                         |     |       |       |    |    |    |   |   |   |   |  |
| <b>SGO_0713</b><br>sgg; GTP-binding protein Era                          | 1.330      | 7.661  | 0.0001 | 0.0001 | 0.586      | 7.177 | 0.0059 | 0.0173 | 0.405        | 7.070 | 0.0056 | 0.0304 | -0.744      | 7.343  | 0.0012 | 0.0024 | -0.925        | 6.666  | 0.0007 | 0.0007 | -0.181         | 6.841 | 0.0893 | 0.2463 |                         |     |       |       |    |    |    |   |   |   |   |  |
| <b>SGO_0715</b><br>mutM; formamidopyrimidine-DNA glycosylase             |            | 2.322  |        |        | -0.001     | 3.321 |        |        |              | 2.322 |        |        |             | 1.807  |        |        |               |        |        |        |                | 1.807 |        |        |                         |     |       |       |    |    |    |   |   |   |   |  |
| <b>SGO_0719</b><br>rnr; ribonuclease R                                   | -0.545     | 6.065  | 0.0077 | 0.0282 | -2.061     | 5.620 | 0.0009 | 0.0013 |              | 5.311 |        |        | -1.516      | 4.686  | 0.0013 | 0.0029 |               | 3.644  |        |        |                | 2.735 |        |        |                         |     |       |       |    |    |    |   |   |   |   |  |
| <b>SGO_0721</b><br>abpB-like dipeptidase lipoprotein                     | 0.551      | 5.573  | 0.0013 | 0.0026 | 0.112      | 5.337 | 0.0947 | 0.4647 | 0.287        | 5.501 | 0.0435 | 0.3781 | -0.439      | 5.111  | 0.0072 | 0.0300 | -0.265        | 4.636  | 0.1044 | 0.7373 | 0.174          | 5.042 | 0.1577 | 0.5139 |                         |     |       |       |    |    |    |   |   |   |   |  |
| <b>SGO_0722</b><br>tehB; tellurite resistance protein TehB               | -0.229     | 5.726  | 0.0706 | 0.4330 | 0.624      | 6.153 | 0.0651 | 0.3027 |              | 4.921 |        |        | 0.853       | 5.475  | 0.0002 | 0.0001 |               | 3.376  |        |        |                | 4.839 |        |        |                         |     |       |       |    |    |    |   |   |   |   |  |
| <b>SGO_0724</b><br>dipeptidase                                           | -1.628     | 6.596  | 0.0007 | 0.0011 | -2.408     | 6.437 | 0.0004 | 0.0003 |              | 6.186 |        |        | -0.780      | 4.723  | 0.0077 | 0.0334 |               | 3.454  |        |        |                | 3.275 |        |        |                         |     |       |       |    |    |    |   |   |   |   |  |
| <b>SGO_0728</b><br>ABC transporter, ATP-binding protein SP1653           |            | 2.000  |        |        |            | 2.000 |        |        |              | 2.000 |        |        |             |        |        |        |               |        |        |        |                |       |        |        |                         |     |       |       |    |    |    |   |   |   |   |  |
| <b>SGO_0729</b><br>ABC transporter permease protein                      |            | 3.022  |        |        |            | 3.022 |        |        |              | 3.022 |        |        |             |        |        |        |               |        |        |        |                |       |        |        |                         |     |       |       |    |    |    |   |   |   |   |  |
| <b>SGO_0731</b><br>RRF2 family protein                                   |            | 4.120  |        |        |            | 4.120 |        |        |              | 4.120 |        |        |             |        |        |        |               |        |        |        |                |       |        |        |                         |     |       |       |    |    |    |   |   |   |   |  |
| <b>SGO_0736</b><br>hprK; HPr(Ser) kinase/phosphatase                     | 0.917      | 6.466  | 0.0009 | 0.0015 | -1.037     | 5.520 | 0.0033 | 0.0081 | -1.951       | 5.113 | 0.0111 | 0.0738 | -1.954      | 5.676  | 0.0005 | 0.0005 | -2.868        | 4.823  | 0.0101 | 0.0416 | -0.914         | 3.749 | 0.0956 | 0.2697 |                         |     |       |       |    |    |    |   |   |   |   |  |
| <b>SGO_0737</b><br>lgt; prolipoprotein diacylglyceryl transferase        |            | 4.348  |        |        |            | 4.348 |        |        |              | 4.348 |        |        |             |        |        |        |               |        |        |        |                |       |        |        |                         |     |       |       |    |    |    |   |   |   |   |  |
| <b>SGO_0738</b><br>Bacterial protein of unknown function (DUF948) family |            | 6.938  |        |        | -3.482     | 7.062 | 0.0005 | 0.0006 |              | 6.938 |        |        |             | 2.941  |        |        |               | 2.941  |        |        |                |       |        |        |                         |     |       |       |    |    |    |   |   |   |   |  |
| <b>SGO_0739</b><br>hypothetical protein SGO_0739                         | -0.567     | 4.807  | 0.0334 | 0.1759 | 0.984      | 5.964 | 0.0021 | 0.0046 | 0.854        | 5.875 | 0.0006 | 0.0015 | 1.551       | 5.087  | 0.0174 | 0.0968 | 1.421         | 4.361  | 0.0109 | 0.0466 | -0.130         | 5.795 | 0.0902 | 0.2502 |                         |     |       |       |    |    |    |   |   |   |   |  |

Show detected proteins only  
 Show all proteins

Proteins found:  
1179

Filter by category:  
ABC Transporter

Dot Plots  
Dot Plots

Test

Cutoff

q-Value

p-Value

.005

| Signif | Direction | Applies To   |
|--------|-----------|--------------|
| yes    | +         | ratios, bars |
| no     | n/a       | bars         |
| yes    | -         | ratios, bars |
| yes    | +         | p-, q-Values |
| yes    | -         | p-, q-Values |

SgFn vs Sg —  
SgPgFn vs Sg —  
SgPgFn vs SgFn —  
SgPg vs Sg —  
SgPg vs SgFn —  
SgPgFn vs SgPg —

Summary Table SgFn vs Sg SgPg vs Sg SgPgFn vs Sg SgPg v SgFn SgPgFn v SgFn SgPgFn vs SgPg Coverage

| Protein                                                                      | SgFn vs Sg |        |        |        | SgPg vs Sg |        |        |        | SgPgFn vs Sg |        |        |        | SgPg v SgFn |        |        |        | SgPgFn v SgFn |        |        |        | SgPgFn vs SgPg |        |        |        | Log <sub>2</sub> Ratios |     |       |       |    |    |    |   |   |   |   |  |
|------------------------------------------------------------------------------|------------|--------|--------|--------|------------|--------|--------|--------|--------------|--------|--------|--------|-------------|--------|--------|--------|---------------|--------|--------|--------|----------------|--------|--------|--------|-------------------------|-----|-------|-------|----|----|----|---|---|---|---|--|
|                                                                              | Ratio      | Sum    | q-Val  | p-Val  | Ratio      | Sum    | q-Val  | p-Val  | Ratio        | Sum    | q-Val  | p-Val  | Ratio       | Sum    | q-Val  | p-Val  | Ratio         | Sum    | q-Val  | p-Val  | Ratio          | Sum    | q-Val  | p-Val  | Ratio                   | Sum | q-Val | p-Val | -6 | -4 | -2 | 0 | 2 | 4 | 6 |  |
| <b>SGO_0742</b><br>peptidase, U32 family                                     | 0.753      | 6.494  | 0.0004 | 0.0005 | 0.310      | 6.232  | 0.0039 | 0.0104 | 0.136        | 5.701  | 0.0463 | 0.4048 | -0.443      | 6.102  | 0.0000 | 0.0000 | -0.616        | 5.103  | 0.0023 | 0.0056 | -0.174         | 5.394  | 0.0184 | 0.0243 |                         |     |       |       |    |    |    |   |   |   |   |  |
| <b>SGO_0743</b><br>peptidase, U32 family                                     | -2.254     | 7.696  | 0.0001 | 0.0000 | -1.241     | 7.933  | 0.0005 | 0.0007 | -1.304       | 7.921  | 0.0007 | 0.0019 | 1.012       | 6.258  | 0.0031 | 0.0096 | 0.950         | 5.620  | 0.0085 | 0.0330 | -0.062         | 6.660  | 0.2296 | 0.8666 |                         |     |       |       |    |    |    |   |   |   |   |  |
| <b>SGO_0745</b><br>hypothetical protein SGO_0745                             | 1.409      | 5.643  | 0.0205 | 0.0948 | 2.842      | 7.443  | 0.0002 | 0.0001 | 2.462        | 7.139  | 0.0015 | 0.0057 | 1.433       | 6.982  | 0.0106 | 0.0504 | 1.053         | 6.078  | 0.0389 | 0.2241 | -0.380         | 7.571  | 0.0455 | 0.0988 |                         |     |       |       |    |    |    |   |   |   |   |  |
| <b>SGO_0749</b><br>glutathione reductase                                     | 2.313      | 7.691  | 0.0032 | 0.0094 | 1.249      | 6.844  | 0.0018 | 0.0038 | 0.577        | 6.407  | 0.0069 | 0.0395 | -1.065      | 7.467  | 0.0068 | 0.0278 | -1.737        | 6.673  | 0.0041 | 0.0126 | -0.672         | 6.517  | 0.0067 | 0.0042 |                         |     |       |       |    |    |    |   |   |   |   |  |
| <b>SGO_0750</b><br>efflux transporter, RND family, MFP subunit subfamily     | -5.485     | 10.400 | 0.0005 | 0.0007 | -1.521     | 10.797 | 0.0013 | 0.0023 | -2.349       | 10.625 | 0.0005 | 0.0012 | 3.963       | 8.415  | 0.0001 | 0.0000 | 3.135         | 7.045  | 0.0004 | 0.0002 | -0.828         | 8.970  | 0.0037 | 0.0010 |                         |     |       |       |    |    |    |   |   |   |   |  |
| <b>SGO_0751</b><br>ABC transporter, ATP-binding protein SP0786               | -3.035     | 7.519  | 0.0002 | 0.0002 | 0.115      | 8.412  | 0.0791 | 0.3822 | 0.176        | 8.439  | 0.0142 | 0.1021 | 3.150       | 7.118  | 0.0009 | 0.0015 | 3.211         | 6.554  | 0.0004 | 0.0003 | 0.061          | 7.986  | 0.1979 | 0.7045 |                         |     |       |       |    |    |    |   |   |   |   |  |
| <b>SGO_0752</b><br>ABC transporter, ATP-binding protein                      |            | 7.159  |        |        | -1.394     | 7.621  | 0.0017 | 0.0034 | -2.977       | 7.247  | 0.0130 | 0.0914 |             | 5.241  |        |        |               | 2.046  |        |        | -1.583         | 5.463  | 0.0073 | 0.0049 |                         |     |       |       |    |    |    |   |   |   |   |  |
| <b>SGO_0753</b><br>lysS; lysyl-tRNA synthetase                               | -0.738     | 8.826  | 0.0084 | 0.0316 | 0.038      | 9.150  | 0.1267 | 0.6427 | -0.113       | 9.075  | 0.0303 | 0.2481 | 0.776       | 8.336  | 0.0061 | 0.0244 | 0.624         | 7.633  | 0.0121 | 0.0526 | -0.152         | 8.582  | 0.0514 | 0.1174 |                         |     |       |       |    |    |    |   |   |   |   |  |
| <b>SGO_0754</b><br>phosphoglycerate mutase family protein                    |            | 3.038  |        |        |            | 1.835  |        |        |              |        |        |        | -1.203      | 3.045  |        |        |               | 1.914  |        |        |                | 1.322  |        |        |                         |     |       |       |    |    |    |   |   |   |   |  |
| <b>SGO_0755</b><br>regulatory protein                                        | 0.217      | 5.320  | 0.0517 | 0.2947 | 0.647      | 5.566  | 0.0123 | 0.0424 | -0.282       | 4.691  | 0.0355 | 0.2972 | 0.430       | 5.150  | 0.0253 | 0.1495 | -0.500        | 3.740  | 0.0565 | 0.3592 | -0.930         | 4.679  | 0.0843 | 0.2256 |                         |     |       |       |    |    |    |   |   |   |   |  |
| <b>SGO_0757</b><br>peptidase, U32 family                                     |            | 6.945  |        |        |            | 6.945  |        |        |              | 6.945  |        |        |             |        |        |        |               |        |        |        |                |        |        |        |                         |     |       |       |    |    |    |   |   |   |   |  |
| <b>SGO_0760</b><br>ppc; phosphoenolpyruvate carboxylase                      | 0.523      | 9.217  | 0.0019 | 0.0046 | 0.615      | 9.269  | 0.0000 | 0.0000 | 0.431        | 9.163  | 0.0019 | 0.0079 | 0.092       | 8.988  | 0.0338 | 0.2120 | -0.093        | 8.287  | 0.0546 | 0.3434 | -0.184         | 8.944  | 0.0275 | 0.0469 |                         |     |       |       |    |    |    |   |   |   |   |  |
| <b>SGO_0761</b><br>tuf; translation elongation factor Tu                     | 0.986      | 13.763 | 0.0007 | 0.0011 | 0.462      | 13.435 | 0.0010 | 0.0017 | 0.656        | 13.549 | 0.0001 | 0.0000 | -0.524      | 13.422 | 0.0022 | 0.0058 | -0.330        | 12.893 | 0.0045 | 0.0138 | 0.194          | 13.234 | 0.0122 | 0.0126 |                         |     |       |       |    |    |    |   |   |   |   |  |
| <b>SGO_0762</b><br>tpiA; triosephosphate isomerase                           | -0.128     | 10.618 | 0.0596 | 0.3510 | 0.868      | 11.183 | 0.0047 | 0.0131 | 1.175        | 11.402 | 0.0039 | 0.0197 | 0.996       | 10.630 | 0.0038 | 0.0129 | 1.303         | 10.244 | 0.0054 | 0.0182 | 0.307          | 11.217 | 0.0902 | 0.2505 |                         |     |       |       |    |    |    |   |   |   |   |  |
| <b>SGO_0763</b><br>murA-1; UDP-N-acetylglucosamine 1-carboxyvinyltransferase | -0.883     | 8.224  | 0.0007 | 0.0010 | -1.037     | 8.173  | 0.0008 | 0.0011 | -1.499       | 8.053  | 0.0010 | 0.0030 | -0.153      | 7.128  | 0.0151 | 0.0803 | -0.615        | 6.340  | 0.0148 | 0.0673 | -0.462         | 6.864  | 0.0656 | 0.1614 |                         |     |       |       |    |    |    |   |   |   |   |  |
| <b>SGO_0765</b><br>endA; DNA-entry nuclease                                  |            | 4.959  |        |        |            | 4.959  |        |        |              | 4.959  |        |        |             |        |        |        |               |        |        |        |                |        |        |        |                         |     |       |       |    |    |    |   |   |   |   |  |

Show detected proteins only  
 Show all proteins

Proteins found:  
1179

Dot Plots  
Dot Plots

Test

Cutoff

q-Value

p-Value

.005

| Signif | Direction | Applies To   |
|--------|-----------|--------------|
| yes    | +         | ratios, bars |
| no     | n/a       | bars         |
| yes    | -         | ratios, bars |
| yes    | +         | p-, q-Values |
| yes    | -         | p-, q-Values |

SgFn vs Sg —  
SgPgFn vs Sg —  
SgPgFn vs SgFn —  
SgPg vs SgPg —  
SgPg vs SgFn —  
SgPgFn vs SgPg —

Summary Table   SgFn vs Sg   SgPg vs Sg   SgPgFn vs Sg   SgPg v SgFn   SgPgFn v SgFn   SgPgFn vs SgPg   Coverage

| Protein                                                   | SgFn vs Sg |        |        |        | SgPg vs Sg |        |        |        | SgPgFn vs Sg |        |        |        | SgPg v SgFn |       |        |        | SgPgFn v SgFn |       |        |        | SgPgFn vs SgPg |       |        |        | Log <sub>2</sub> Ratios |     |       |       |    |    |    |   |   |   |   |  |
|-----------------------------------------------------------|------------|--------|--------|--------|------------|--------|--------|--------|--------------|--------|--------|--------|-------------|-------|--------|--------|---------------|-------|--------|--------|----------------|-------|--------|--------|-------------------------|-----|-------|-------|----|----|----|---|---|---|---|--|
|                                                           | Ratio      | Sum    | q-Val  | p-Val  | Ratio      | Sum    | q-Val  | p-Val  | Ratio        | Sum    | q-Val  | p-Val  | Ratio       | Sum   | q-Val  | p-Val  | Ratio         | Sum   | q-Val  | p-Val  | Ratio          | Sum   | q-Val  | p-Val  | Ratio                   | Sum | q-Val | p-Val | -6 | -4 | -2 | 0 | 2 | 4 | 6 |  |
| SGO_0767                                                  | 0.649      | 5.851  | 0.0207 | 0.0965 | -0.180     | 5.377  | 0.0674 | 0.3152 |              | 4.456  |        |        | -0.829      | 5.279 | 0.0144 | 0.0755 |               | 4.038 |        |        |                | 3.781 |        |        |                         |     |       |       |    |    |    |   |   |   |   |  |
| transport protein                                         |            |        |        |        |            |        |        |        |              |        |        |        |             |       |        |        |               |       |        |        |                |       |        |        |                         |     |       |       |    |    |    |   |   |   |   |  |
| SGO_0771                                                  | 1.357      | 8.365  | 0.0016 | 0.0037 | 1.279      | 8.306  | 0.0013 | 0.0023 | 0.699        | 7.925  | 0.0046 | 0.0243 | -0.078      | 8.325 | 0.0501 | 0.3396 | -0.658        | 7.462 | 0.0020 | 0.0046 | -0.580         | 8.022 | 0.0012 | 0.0001 |                         |     |       |       |    |    |    |   |   |   |   |  |
| pepq; proline dipeptidase                                 |            |        |        |        |            |        |        |        |              |        |        |        |             |       |        |        |               |       |        |        |                |       |        |        |                         |     |       |       |    |    |    |   |   |   |   |  |
| SGO_0773                                                  | -2.320     | 10.237 | 0.0002 | 0.0001 | -2.406     | 10.223 | 0.0002 | 0.0001 | -2.492       | 10.209 | 0.0001 | 0.0001 | -0.087      | 8.100 | 0.0601 | 0.4177 | -0.172        | 7.448 | 0.0253 | 0.1330 | -0.086         | 8.013 | 0.1168 | 0.3541 |                         |     |       |       |    |    |    |   |   |   |   |  |
| ccpA; catabolite control protein A                        |            |        |        |        |            |        |        |        |              |        |        |        |             |       |        |        |               |       |        |        |                |       |        |        |                         |     |       |       |    |    |    |   |   |   |   |  |
| SGO_0774                                                  | -1.831     | 7.074  | 0.0009 | 0.0018 | -1.574     | 7.142  | 0.0017 | 0.0036 | -1.853       | 6.904  | 0.0142 | 0.1017 | 0.257       | 5.516 | 0.0357 | 0.2284 | -0.022        | 4.332 | 0.1048 | 0.7413 | -0.279         | 5.141 | 0.1579 | 0.5182 |                         |     |       |       |    |    |    |   |   |   |   |  |
| glycosyl transferase, group 1 family protein              |            |        |        |        |            |        |        |        |              |        |        |        |             |       |        |        |               |       |        |        |                |       |        |        |                         |     |       |       |    |    |    |   |   |   |   |  |
| SGO_0775                                                  | -0.533     | 6.511  | 0.0127 | 0.0537 | -0.719     | 6.433  | 0.0052 | 0.0149 | -1.162       | 6.276  | 0.0009 | 0.0028 | -0.186      | 5.622 | 0.0562 | 0.3873 | -0.629        | 4.816 | 0.0103 | 0.0434 | -0.443         | 5.309 | 0.0248 | 0.0395 |                         |     |       |       |    |    |    |   |   |   |   |  |
| glycosyl transferase, group 1                             |            |        |        |        |            |        |        |        |              |        |        |        |             |       |        |        |               |       |        |        |                |       |        |        |                         |     |       |       |    |    |    |   |   |   |   |  |
| SGO_0778                                                  | -0.632     | 9.020  | 0.0003 | 0.0002 | -0.132     | 9.237  | 0.0068 | 0.0204 | -0.413       | 9.110  | 0.0003 | 0.0004 | 0.500       | 8.428 | 0.0005 | 0.0005 | 0.220         | 7.659 | 0.0011 | 0.0016 | -0.280         | 8.523 | 0.0045 | 0.0014 |                         |     |       |       |    |    |    |   |   |   |   |  |
| thrS; threonyl-tRNA synthetase                            |            |        |        |        |            |        |        |        |              |        |        |        |             |       |        |        |               |       |        |        |                |       |        |        |                         |     |       |       |    |    |    |   |   |   |   |  |
| SGO_0779                                                  | 1.732      | 7.769  | 0.0006 | 0.0008 | 0.258      | 6.808  | 0.0709 | 0.3336 | -1.147       | 6.246  | 0.0082 | 0.0488 | -1.473      | 7.317 | 0.0007 | 0.0008 | -2.878        | 6.457 | 0.0005 | 0.0004 | -1.405         | 5.902 | 0.0158 | 0.0186 |                         |     |       |       |    |    |    |   |   |   |   |  |
| response regulator                                        |            |        |        |        |            |        |        |        |              |        |        |        |             |       |        |        |               |       |        |        |                |       |        |        |                         |     |       |       |    |    |    |   |   |   |   |  |
| SGO_0780                                                  | -1.119     | 5.893  | 0.0058 | 0.0196 | -2.189     | 5.620  | 0.0017 | 0.0034 |              | 5.337  |        |        | -1.070      | 4.283 | 0.0082 | 0.0369 |               | 3.126 |        |        |                | 2.617 |        |        |                         |     |       |       |    |    |    |   |   |   |   |  |
| histidine kinase                                          |            |        |        |        |            |        |        |        |              |        |        |        |             |       |        |        |               |       |        |        |                |       |        |        |                         |     |       |       |    |    |    |   |   |   |   |  |
| SGO_0781                                                  | -1.851     | 5.277  | 0.0213 | 0.0999 |            | 5.091  |        |        |              | 5.091  |        |        |             | 1.717 |        |        |               | 1.107 |        |        |                |       |        |        |                         |     |       |       |    |    |    |   |   |   |   |  |
| vicX; Zn-dependent hydrolase (beta-lactamase superfamily) |            |        |        |        |            |        |        |        |              |        |        |        |             |       |        |        |               |       |        |        |                |       |        |        |                         |     |       |       |    |    |    |   |   |   |   |  |
| SGO_0782                                                  |            | 3.665  |        |        |            | 3.665  |        |        |              | 3.665  |        |        |             |       |        |        |               |       |        |        |                |       |        |        |                         |     |       |       |    |    |    |   |   |   |   |  |
| Protein of unknown function (DUF454) family               |            |        |        |        |            |        |        |        |              |        |        |        |             |       |        |        |               |       |        |        |                |       |        |        |                         |     |       |       |    |    |    |   |   |   |   |  |
| SGO_0784                                                  | -1.644     | 8.363  | 0.0015 | 0.0033 | -1.759     | 8.327  | 0.0011 | 0.0018 | -2.876       | 8.139  | 0.0005 | 0.0010 | -0.115      | 6.752 | 0.0695 | 0.4919 | -1.232        | 5.715 | 0.0055 | 0.0190 | -1.117         | 6.222 | 0.0007 | 0.0000 |                         |     |       |       |    |    |    |   |   |   |   |  |
| smc; chromosome segregation protein SMC                   |            |        |        |        |            |        |        |        |              |        |        |        |             |       |        |        |               |       |        |        |                |       |        |        |                         |     |       |       |    |    |    |   |   |   |   |  |
| SGO_0785                                                  | -0.328     | 4.940  | 0.0462 | 0.2608 | -0.875     | 4.804  | 0.0299 | 0.1232 |              | 4.457  |        |        | -0.548      | 3.363 |        |        |               | 2.000 |        |        |                | 2.063 |        |        |                         |     |       |       |    |    |    |   |   |   |   |  |
| Cof family protein                                        |            |        |        |        |            |        |        |        |              |        |        |        |             |       |        |        |               |       |        |        |                |       |        |        |                         |     |       |       |    |    |    |   |   |   |   |  |
| SGO_0786                                                  | -1.050     | 4.921  | 0.0257 | 0.1273 | 0.800      | 6.061  | 0.0010 | 0.0015 | 0.377        | 5.816  | 0.0142 | 0.1012 | 1.850       | 5.077 | 0.0050 | 0.0193 | 1.427         | 4.116 | 0.0282 | 0.1522 | -0.423         | 5.701 | 0.0238 | 0.0369 |                         |     |       |       |    |    |    |   |   |   |   |  |
| Cof family protein                                        |            |        |        |        |            |        |        |        |              |        |        |        |             |       |        |        |               |       |        |        |                |       |        |        |                         |     |       |       |    |    |    |   |   |   |   |  |
| SGO_0787                                                  | -0.721     | 7.421  | 0.0055 | 0.0182 | -0.273     | 7.598  | 0.0142 | 0.0509 | -0.953       | 7.335  | 0.0016 | 0.0064 | 0.448       | 6.741 | 0.0087 | 0.0402 | -0.232        | 5.787 | 0.0490 | 0.2959 | -0.680         | 6.644 | 0.0078 | 0.0056 |                         |     |       |       |    |    |    |   |   |   |   |  |
| ftsY; cell division protein FtsY                          |            |        |        |        |            |        |        |        |              |        |        |        |             |       |        |        |               |       |        |        |                |       |        |        |                         |     |       |       |    |    |    |   |   |   |   |  |
| SGO_0788                                                  | 2.261      | 8.231  | 0.0012 | 0.0024 | 1.244      | 7.437  | 0.0003 | 0.0002 | 1.161        | 7.380  | 0.0002 | 0.0002 | -1.017      | 8.020 | 0.0028 | 0.0083 | -1.100        | 7.383 | 0.0027 | 0.0071 | -0.083         | 7.373 | 0.0165 | 0.0200 |                         |     |       |       |    |    |    |   |   |   |   |  |
| zwf; glucose-6-phosphate 1-dehydrogenase                  |            |        |        |        |            |        |        |        |              |        |        |        |             |       |        |        |               |       |        |        |                |       |        |        |                         |     |       |       |    |    |    |   |   |   |   |  |
| SGO_0792                                                  | -1.830     | 6.869  | 0.0014 | 0.0031 | -0.585     | 7.246  | 0.0105 | 0.0350 | -0.372       | 7.330  | 0.0097 | 0.0613 | 1.245       | 5.922 | 0.0025 | 0.0071 | 1.458         | 5.456 | 0.0009 | 0.0011 | 0.213          | 6.515 | 0.0667 | 0.1684 |                         |     |       |       |    |    |    |   |   |   |   |  |
| hypothetical protein SGO_0792                             |            |        |        |        |            |        |        |        |              |        |        |        |             |       |        |        |               |       |        |        |                |       |        |        |                         |     |       |       |    |    |    |   |   |   |   |  |

Show detected proteins only  
 Show all proteins

Proteins found:  
1179

Dot Plots  
 Dot Plots

Test

Cutoff

q-Value

p-Value

.005

| Signif | Direction | Applies To   |
|--------|-----------|--------------|
| yes    | +         | ratios, bars |
| no     | n/a       | bars         |
| yes    | -         | ratios, bars |
| yes    | +         | p-, q-Values |
| yes    | -         | p-, q-Values |

SgFn vs Sg — — SgPg vs Sg  
SgPgFn vs Sg — — SgPg v SgFn  
SgPgFn vs SgFn — — SgPgFn vs SgPg

Summary Table SgFn vs Sg SgPg vs Sg SgPgFn vs Sg SgPg v SgFn SgPgFn v SgFn SgPgFn vs SgPg Coverage

| Protein                                                          | SgFn vs Sg |       |        |        | SgPg vs Sg |       |        |        | SgPgFn vs Sg |       |        |        | SgPg v SgFn |       |        |        | SgPgFn v SgFn |       |        |        | SgPgFn vs SgPg |       |        |        | Log <sub>2</sub> Ratios |     |       |       |    |    |    |   |   |   |   |  |
|------------------------------------------------------------------|------------|-------|--------|--------|------------|-------|--------|--------|--------------|-------|--------|--------|-------------|-------|--------|--------|---------------|-------|--------|--------|----------------|-------|--------|--------|-------------------------|-----|-------|-------|----|----|----|---|---|---|---|--|
|                                                                  | Ratio      | Sum   | q-Val  | p-Val  | Ratio      | Sum   | q-Val  | p-Val  | Ratio        | Sum   | q-Val  | p-Val  | Ratio       | Sum   | q-Val  | p-Val  | Ratio         | Sum   | q-Val  | p-Val  | Ratio          | Sum   | q-Val  | p-Val  | Ratio                   | Sum | q-Val | p-Val | -6 | -4 | -2 | 0 | 2 | 4 | 6 |  |
| SGO_0794                                                         | 0.304      | 7.978 | 0.0206 | 0.0955 | -0.049     | 7.789 | 0.1049 | 0.5188 | -0.592       | 7.547 | 0.0015 | 0.0055 | -0.353      | 7.442 | 0.0119 | 0.0588 | -0.896        | 6.619 | 0.0029 | 0.0081 | -0.543         | 7.003 | 0.0048 | 0.0017 |                         |     |       |       |    |    |    |   |   |   |   |  |
| metallo-beta-lactamase family protein                            |            |       |        |        |            |       |        |        |              |       |        |        |             |       |        |        |               |       |        |        |                |       |        |        |                         |     |       |       |    |    |    |   |   |   |   |  |
| SGO_0795                                                         | 2.063      | 5.813 | 0.0022 | 0.0058 | 1.371      | 5.264 | 0.0002 | 0.0001 | 0.525        | 4.707 | 0.0008 | 0.0022 | -0.692      | 5.681 | 0.0081 | 0.0360 | -1.539        | 4.805 | 0.0031 | 0.0086 | -0.846         | 4.916 | 0.0016 | 0.0002 |                         |     |       |       |    |    |    |   |   |   |   |  |
| tributyryn esterase                                              |            |       |        |        |            |       |        |        |              |       |        |        |             |       |        |        |               |       |        |        |                |       |        |        |                         |     |       |       |    |    |    |   |   |   |   |  |
| SGO_0797                                                         | -0.613     | 4.048 |        |        |            | 3.322 |        |        |              | 3.322 |        |        |             | 2.196 |        |        |               | 1.585 |        |        |                |       |        |        |                         |     |       |       |    |    |    |   |   |   |   |  |
| RocB protein, putative                                           |            |       |        |        |            |       |        |        |              |       |        |        |             |       |        |        |               |       |        |        |                |       |        |        |                         |     |       |       |    |    |    |   |   |   |   |  |
| SGO_0798                                                         | -1.060     | 7.828 | 0.0009 | 0.0017 | -1.256     | 7.768 | 0.0009 | 0.0013 | -1.346       | 7.742 | 0.0005 | 0.0011 | -0.196      | 6.593 | 0.0045 | 0.0162 | -0.286        | 5.940 | 0.0007 | 0.0007 | -0.090         | 6.447 | 0.0451 | 0.0973 |                         |     |       |       |    |    |    |   |   |   |   |  |
| ABC transporter, ATP-binding protein SP1381                      |            |       |        |        |            |       |        |        |              |       |        |        |             |       |        |        |               |       |        |        |                |       |        |        |                         |     |       |       |    |    |    |   |   |   |   |  |
| SGO_0800                                                         | -2.065     | 6.313 | 0.0072 | 0.0261 | -1.446     | 6.450 | 0.0120 | 0.0409 | -1.735       | 6.211 | 0.0329 | 0.2721 | 0.619       | 4.705 | 0.0019 | 0.0047 | 0.330         | 3.454 | 0.0202 | 0.0988 | -0.289         | 4.477 | 0.0893 | 0.2470 |                         |     |       |       |    |    |    |   |   |   |   |  |
| polysaccharide deacetylase family protein                        |            |       |        |        |            |       |        |        |              |       |        |        |             |       |        |        |               |       |        |        |                |       |        |        |                         |     |       |       |    |    |    |   |   |   |   |  |
| SGO_0801                                                         | 0.572      | 8.591 | 0.0014 | 0.0028 | 1.139      | 8.955 | 0.0003 | 0.0002 | 0.695        | 8.684 | 0.0080 | 0.0468 | 0.567       | 8.645 | 0.0005 | 0.0004 | 0.123         | 7.802 | 0.0693 | 0.4577 | -0.444         | 8.709 | 0.0357 | 0.0679 |                         |     |       |       |    |    |    |   |   |   |   |  |
| hom; homoserine dehydrogenase                                    |            |       |        |        |            |       |        |        |              |       |        |        |             |       |        |        |               |       |        |        |                |       |        |        |                         |     |       |       |    |    |    |   |   |   |   |  |
| SGO_0802                                                         | 0.760      | 6.777 | 0.0003 | 0.0003 | 0.767      | 6.782 | 0.0003 | 0.0002 | -0.222       | 6.252 | 0.0335 | 0.2779 | 0.008       | 6.597 | 0.0826 | 0.6016 | -0.982        | 5.582 | 0.0015 | 0.0031 | -0.990         | 6.198 | 0.0056 | 0.0030 |                         |     |       |       |    |    |    |   |   |   |   |  |
| thrB; homoserine kinase                                          |            |       |        |        |            |       |        |        |              |       |        |        |             |       |        |        |               |       |        |        |                |       |        |        |                         |     |       |       |    |    |    |   |   |   |   |  |
| SGO_0803                                                         |            | 7.539 |        |        | -1.866     | 7.889 | 0.0002 | 0.0001 | -2.851       | 7.738 | 0.0002 | 0.0002 |             | 5.159 |        |        |               | 3.654 |        |        | -0.985         | 5.780 | 0.0183 | 0.0238 |                         |     |       |       |    |    |    |   |   |   |   |  |
| hypothetical protein SGO_0803                                    |            |       |        |        |            |       |        |        |              |       |        |        |             |       |        |        |               |       |        |        |                |       |        |        |                         |     |       |       |    |    |    |   |   |   |   |  |
| SGO_0804                                                         | 0.475      | 5.314 | 0.0954 | 0.6141 | -0.227     | 4.969 | 0.0921 | 0.4499 |              | 4.183 |        |        | -0.701      | 4.607 | 0.0102 | 0.0483 |               | 3.311 |        |        |                | 3.205 |        |        |                         |     |       |       |    |    |    |   |   |   |   |  |
| murB; UDP-N-acetylenolpyruvoylglucosamine reductase              |            |       |        |        |            |       |        |        |              |       |        |        |             |       |        |        |               |       |        |        |                |       |        |        |                         |     |       |       |    |    |    |   |   |   |   |  |
| SGO_0805                                                         | -1.847     | 6.699 | 0.0005 | 0.0007 | -2.598     | 6.570 | 0.0004 | 0.0005 |              | 6.344 |        |        | -0.751      | 4.677 | 0.0092 | 0.0427 |               | 3.382 |        |        |                | 3.272 |        |        |                         |     |       |       |    |    |    |   |   |   |   |  |
| potA; spermidine/putrescine ABC transporter, ATP-binding subunit |            |       |        |        |            |       |        |        |              |       |        |        |             |       |        |        |               |       |        |        |                |       |        |        |                         |     |       |       |    |    |    |   |   |   |   |  |
| SGO_0806                                                         |            | 4.271 |        |        |            | 4.271 |        |        |              | 4.271 |        |        |             |       |        |        |               |       |        |        |                |       |        |        |                         |     |       |       |    |    |    |   |   |   |   |  |
| potB; spermidine/putrescine ABC transporter, permease protein    |            |       |        |        |            |       |        |        |              |       |        |        |             |       |        |        |               |       |        |        |                |       |        |        |                         |     |       |       |    |    |    |   |   |   |   |  |
| SGO_0808                                                         | -3.175     | 6.779 | 0.0410 | 0.2259 | -3.301     | 6.773 | 0.0501 | 0.2239 |              | 6.705 |        |        | -0.125      | 2.871 |        |        |               | 1.322 |        |        |                | 1.807 |        |        |                         |     |       |       |    |    |    |   |   |   |   |  |
| potD; spermidine/putrescine ABC transporter                      |            |       |        |        |            |       |        |        |              |       |        |        |             |       |        |        |               |       |        |        |                |       |        |        |                         |     |       |       |    |    |    |   |   |   |   |  |
| SGO_0812                                                         | 1.605      | 6.051 | 0.0014 | 0.0029 | -0.235     | 4.916 | 0.0150 | 0.0547 |              | 4.031 |        |        | -1.840      | 5.482 | 0.0012 | 0.0023 |               | 4.519 |        |        |                | 3.278 |        |        |                         |     |       |       |    |    |    |   |   |   |   |  |
| hypothetical protein SGO_0812                                    |            |       |        |        |            |       |        |        |              |       |        |        |             |       |        |        |               |       |        |        |                |       |        |        |                         |     |       |       |    |    |    |   |   |   |   |  |
| SGO_0813                                                         | 0.162      | 3.519 | 0.0963 | 0.6216 |            | 1.807 |        |        |              | 1.807 |        |        |             | 2.480 |        |        |               | 1.869 |        |        |                |       |        |        |                         |     |       |       |    |    |    |   |   |   |   |  |
| fructose-bisphosphatase                                          |            |       |        |        |            |       |        |        |              |       |        |        |             |       |        |        |               |       |        |        |                |       |        |        |                         |     |       |       |    |    |    |   |   |   |   |  |
| SGO_0814                                                         |            | 2.170 |        |        | 0.665      | 3.541 |        |        | 0.226        | 3.287 |        |        |             | 2.322 |        |        |               | 1.272 |        |        | -0.439         | 3.119 |        |        |                         |     |       |       |    |    |    |   |   |   |   |  |
| aminotransferase, class-V                                        |            |       |        |        |            |       |        |        |              |       |        |        |             |       |        |        |               |       |        |        |                |       |        |        |                         |     |       |       |    |    |    |   |   |   |   |  |
| SGO_0815                                                         | -1.223     | 7.201 | 0.0008 | 0.0014 | -0.231     | 7.574 | 0.0182 | 0.0693 | -0.667       | 7.389 | 0.0012 | 0.0041 | 0.991       | 6.530 | 0.0013 | 0.0026 | 0.556         | 5.645 | 0.0041 | 0.0124 | -0.436         | 6.739 | 0.0128 | 0.0137 |                         |     |       |       |    |    |    |   |   |   |   |  |
| thiI; thiamine biosynthesis protein ThiI                         |            |       |        |        |            |       |        |        |              |       |        |        |             |       |        |        |               |       |        |        |                |       |        |        |                         |     |       |       |    |    |    |   |   |   |   |  |

Show detected proteins only  
 Show all proteins

Filter by category:

Proteins found:  
1179

Dot Plots  
Dot Plots

Test Cutoff

q-Value p-Value

.005

| Signif | Direction | Applies To   |
|--------|-----------|--------------|
| yes    | +         | ratios, bars |
| no     | n/a       | bars         |
| yes    | -         | ratios, bars |
| yes    | +         | p-, q-Values |
| yes    | -         | p-, q-Values |

SgFn vs Sg — — SgPg vs Sg  
SgPgFn vs Sg — — SgPg vs SgFn  
SgPgFn vs SgFn — — SgPgFn vs SgPg

Summary Table SgFn vs Sg SgPg vs Sg SgPgFn vs Sg SgPg v SgFn SgPgFn v SgFn SgPgFn vs SgPg Coverage

| Protein                           | SgFn vs Sg   |       |        |        | SgPg vs Sg    |       |        |        | SgPgFn vs Sg |       |        |        | SgPg v SgFn   |       |        |        | SgPgFn v SgFn |       |        |        | SgPgFn vs SgPg |       |        |        | Log <sub>2</sub> Ratios |     |       |       |    |    |    |   |   |   |   |  |
|-----------------------------------|--------------|-------|--------|--------|---------------|-------|--------|--------|--------------|-------|--------|--------|---------------|-------|--------|--------|---------------|-------|--------|--------|----------------|-------|--------|--------|-------------------------|-----|-------|-------|----|----|----|---|---|---|---|--|
|                                   | Ratio        | Sum   | q-Val  | p-Val  | Ratio         | Sum   | q-Val  | p-Val  | Ratio        | Sum   | q-Val  | p-Val  | Ratio         | Sum   | q-Val  | p-Val  | Ratio         | Sum   | q-Val  | p-Val  | Ratio          | Sum   | q-Val  | p-Val  | Ratio                   | Sum | q-Val | p-Val | -6 | -4 | -2 | 0 | 2 | 4 | 6 |  |
| <b>SGO_0817</b>                   |              | 3.556 |        |        |               | 3.556 |        |        |              | 3.556 |        |        |               |       |        |        |               |       |        |        |                |       |        |        |                         |     |       |       |    |    |    |   |   |   |   |  |
| hypothetical protein SGO_0817     |              |       |        |        |               |       |        |        |              |       |        |        |               |       |        |        |               |       |        |        |                |       |        |        |                         |     |       |       |    |    |    |   |   |   |   |  |
| <b>SGO_0818</b>                   | -0.991       | 7.586 | 0.0392 | 0.2131 | <b>2.010</b>  | 9.582 | 0.0005 | 0.0006 | <b>2.156</b> | 9.701 | 0.0004 | 0.0007 | 3.001         | 8.832 | 0.0110 | 0.0524 | 3.147         | 8.361 | 0.0134 | 0.0601 | 0.146          | 9.821 | 0.0805 | 0.2119 |                         |     |       |       |    |    |    |   |   |   |   |  |
| rplU; ribosomal protein L21       |              |       |        |        |               |       |        |        |              |       |        |        |               |       |        |        |               |       |        |        |                |       |        |        |                         |     |       |       |    |    |    |   |   |   |   |  |
| <b>SGO_0820</b>                   | -0.660       | 7.245 | 0.0675 | 0.4089 | 0.025         | 7.846 | 0.1704 | 0.8971 | 0.074        | 7.887 | 0.0933 | 0.8915 | 0.685         | 6.704 | 0.0229 | 0.1335 | 0.734         | 6.156 | 0.0515 | 0.3181 | 0.049          | 7.356 | 0.1989 | 0.7149 |                         |     |       |       |    |    |    |   |   |   |   |  |
| rpmA; ribosomal protein L27       |              |       |        |        |               |       |        |        |              |       |        |        |               |       |        |        |               |       |        |        |                |       |        |        |                         |     |       |       |    |    |    |   |   |   |   |  |
| <b>SGO_0822</b>                   |              | 3.621 |        |        |               | 3.621 |        |        |              | 3.621 |        |        |               |       |        |        |               |       |        |        |                |       |        |        |                         |     |       |       |    |    |    |   |   |   |   |  |
| lipoprotein, putative             |              |       |        |        |               |       |        |        |              |       |        |        |               |       |        |        |               |       |        |        |                |       |        |        |                         |     |       |       |    |    |    |   |   |   |   |  |
| <b>SGO_0823</b>                   | 0.742        | 4.129 | 0.0368 | 0.1974 | -0.165        | 2.920 |        |        |              | 2.000 |        |        | -0.907        | 3.580 | 0.0282 | 0.1720 |               | 2.630 |        |        |                | 1.322 |        |        |                         |     |       |       |    |    |    |   |   |   |   |  |
| Cof family protein                |              |       |        |        |               |       |        |        |              |       |        |        |               |       |        |        |               |       |        |        |                |       |        |        |                         |     |       |       |    |    |    |   |   |   |   |  |
| <b>SGO_0824</b>                   | 0.590        | 7.350 | 0.0082 | 0.0310 | <b>1.254</b>  | 7.781 | 0.0010 | 0.0017 | <b>0.727</b> | 7.433 | 0.0035 | 0.0168 | <b>0.663</b>  | 7.458 | 0.0000 | 0.0000 | 0.136         | 6.548 | 0.0078 | 0.0297 | <b>-0.527</b>  | 7.513 | 0.0019 | 0.0003 |                         |     |       |       |    |    |    |   |   |   |   |  |
| lepA; GTP-binding protein LepA    |              |       |        |        |               |       |        |        |              |       |        |        |               |       |        |        |               |       |        |        |                |       |        |        |                         |     |       |       |    |    |    |   |   |   |   |  |
| <b>SGO_0825</b>                   | -2.331       | 6.193 | 0.0250 | 0.1222 | <b>-1.794</b> | 6.419 | 0.0019 | 0.0042 |              | 6.057 |        |        | 0.536         | 4.160 | 0.0096 | 0.0448 |               | 1.585 |        |        |                | 3.732 |        |        |                         |     |       |       |    |    |    |   |   |   |   |  |
| lipoprotein, putative             |              |       |        |        |               |       |        |        |              |       |        |        |               |       |        |        |               |       |        |        |                |       |        |        |                         |     |       |       |    |    |    |   |   |   |   |  |
| <b>SGO_0830</b>                   | 1.409        | 3.045 | 0.0116 | 0.0479 | 0.755         | 2.710 | 0.0282 | 0.1150 |              | 1.832 |        |        | -0.654        | 2.427 |        |        |               | 1.107 |        |        |                | 1.063 |        |        |                         |     |       |       |    |    |    |   |   |   |   |  |
| uvrC; excinuclease ABC, C subunit |              |       |        |        |               |       |        |        |              |       |        |        |               |       |        |        |               |       |        |        |                |       |        |        |                         |     |       |       |    |    |    |   |   |   |   |  |
| <b>SGO_0832</b>                   | -3.238       | 6.446 | 0.0184 | 0.0838 | <b>-2.252</b> | 6.649 | 0.0010 | 0.0016 | -2.454       | 6.497 | 0.0130 | 0.0915 | 0.985         | 3.942 | 0.0356 | 0.2272 | 0.783         | 2.444 |        |        | -0.202         | 4.135 | 0.1685 | 0.5790 |                         |     |       |       |    |    |    |   |   |   |   |  |
| hypothetical protein SGO_0832     |              |       |        |        |               |       |        |        |              |       |        |        |               |       |        |        |               |       |        |        |                |       |        |        |                         |     |       |       |    |    |    |   |   |   |   |  |
| <b>SGO_0833</b>                   |              | 5.529 |        |        |               | 3.120 |        |        |              |       |        |        | <b>-2.479</b> | 5.265 | 0.0007 | 0.0009 |               | 4.405 |        |        |                | 2.606 |        |        |                         |     |       |       |    |    |    |   |   |   |   |  |
| phosphoesterase-related gene      |              |       |        |        |               |       |        |        |              |       |        |        |               |       |        |        |               |       |        |        |                |       |        |        |                         |     |       |       |    |    |    |   |   |   |   |  |
| <b>SGO_0834</b>                   | -1.079       | 4.671 | 0.0550 | 0.3178 |               | 4.377 |        |        |              | 4.377 |        |        |               | 1.717 |        |        |               | 1.107 |        |        |                |       |        |        |                         |     |       |       |    |    |    |   |   |   |   |  |
| hypothetical protein SGO_0834     |              |       |        |        |               |       |        |        |              |       |        |        |               |       |        |        |               |       |        |        |                |       |        |        |                         |     |       |       |    |    |    |   |   |   |   |  |
| <b>SGO_0835</b>                   | <b>2.378</b> | 8.920 | 0.0001 | 0.0000 | <b>1.275</b>  | 8.064 | 0.0004 | 0.0004 | <b>1.176</b> | 8.008 | 0.0025 | 0.0110 | <b>-1.103</b> | 8.702 | 0.0000 | 0.0000 | <b>-1.203</b> | 8.066 | 0.0008 | 0.0008 | -0.100         | 8.008 | 0.1676 | 0.5747 |                         |     |       |       |    |    |    |   |   |   |   |  |
| nitroreductase                    |              |       |        |        |               |       |        |        |              |       |        |        |               |       |        |        |               |       |        |        |                |       |        |        |                         |     |       |       |    |    |    |   |   |   |   |  |
| <b>SGO_0836</b>                   | <b>1.291</b> | 9.572 | 0.0004 | 0.0004 | <b>0.793</b>  | 9.237 | 0.0004 | 0.0004 | 0.471        | 9.046 | 0.0053 | 0.0283 | <b>-0.497</b> | 9.336 | 0.0013 | 0.0026 | <b>-0.820</b> | 8.604 | 0.0015 | 0.0029 | -0.322         | 8.917 | 0.0227 | 0.0344 |                         |     |       |       |    |    |    |   |   |   |   |  |
| pepV; dipeptidase PepV            |              |       |        |        |               |       |        |        |              |       |        |        |               |       |        |        |               |       |        |        |                |       |        |        |                         |     |       |       |    |    |    |   |   |   |   |  |
| <b>SGO_0841</b>                   | 4.736        | 7.573 | 0.0111 | 0.0444 |               | 1.807 |        |        |              | 1.807 |        |        |               | 7.033 |        |        |               | 6.422 |        |        |                |       |        |        |                         |     |       |       |    |    |    |   |   |   |   |  |
| oxidoreductase                    |              |       |        |        |               |       |        |        |              |       |        |        |               |       |        |        |               |       |        |        |                |       |        |        |                         |     |       |       |    |    |    |   |   |   |   |  |
| <b>SGO_0842</b>                   | <b>2.744</b> | 6.552 | 0.0028 | 0.0078 | 0.073         | 4.710 | 0.1825 | 0.9811 | 0.388        | 4.835 | 0.0615 | 0.5534 | <b>-2.671</b> | 6.038 | 0.0025 | 0.0072 | <b>-2.356</b> | 5.463 | 0.0027 | 0.0073 | 0.314          | 4.316 | 0.1271 | 0.3929 |                         |     |       |       |    |    |    |   |   |   |   |  |
| rhodanese family protein          |              |       |        |        |               |       |        |        |              |       |        |        |               |       |        |        |               |       |        |        |                |       |        |        |                         |     |       |       |    |    |    |   |   |   |   |  |
| <b>SGO_0848</b>                   | -0.727       | 7.350 | 0.0071 | 0.0254 | <b>1.269</b>  | 8.420 | 0.0000 | 0.0000 | <b>1.395</b> | 8.511 | 0.0001 | 0.0001 | <b>1.996</b>  | 7.739 | 0.0004 | 0.0003 | <b>2.122</b>  | 7.230 | 0.0005 | 0.0003 | 0.126          | 8.471 | 0.0199 | 0.0280 |                         |     |       |       |    |    |    |   |   |   |   |  |
| rpmE; ribosomal protein L31       |              |       |        |        |               |       |        |        |              |       |        |        |               |       |        |        |               |       |        |        |                |       |        |        |                         |     |       |       |    |    |    |   |   |   |   |  |

Show detected proteins only  
 Show all proteins

Proteins found:  
1179

Dot Plots  
Dot Plots

Test

Cutoff

q-Value

p-Value

.005

| Signif | Direction | Applies To   |
|--------|-----------|--------------|
| yes    | +         | ratios, bars |
| no     | n/a       | bars         |
| yes    | -         | ratios, bars |
| yes    | +         | p-, q-Values |
| yes    | -         | p-, q-Values |

SgFn vs Sg — — SgPg vs Sg  
SgPgFn vs Sg — — SgPg vs SgFn  
SgPgFn vs SgFn — — SgPgFn vs SgPg

Summary Table SgFn vs Sg SgPg vs Sg SgPgFn vs Sg SgPg v SgFn SgPgFn v SgFn SgPgFn vs SgPg Coverage

| Protein                                           | SgFn vs Sg |       |        |        | SgPg vs Sg |       |        |        | SgPgFn vs Sg |       |        |        | SgPg v SgFn |       |        |        | SgPgFn v SgFn |       |        |        | SgPgFn vs SgPg |       |        |        | Log <sub>2</sub> Ratios |     |       |       |    |    |    |   |   |   |   |  |
|---------------------------------------------------|------------|-------|--------|--------|------------|-------|--------|--------|--------------|-------|--------|--------|-------------|-------|--------|--------|---------------|-------|--------|--------|----------------|-------|--------|--------|-------------------------|-----|-------|-------|----|----|----|---|---|---|---|--|
|                                                   | Ratio      | Sum   | q-Val  | p-Val  | Ratio      | Sum   | q-Val  | p-Val  | Ratio        | Sum   | q-Val  | p-Val  | Ratio       | Sum   | q-Val  | p-Val  | Ratio         | Sum   | q-Val  | p-Val  | Ratio          | Sum   | q-Val  | p-Val  | Ratio                   | Sum | q-Val | p-Val | -6 | -4 | -2 | 0 | 2 | 4 | 6 |  |
| SGO_0849                                          | 0.752      | 6.415 | 0.0126 | 0.0528 | 0.055      | 6.011 | 0.1464 | 0.7609 |              | 4.979 |        |        | -0.697      | 5.926 | 0.0132 | 0.0684 |               | 4.626 |        |        |                | 4.529 |        |        |                         |     |       |       |    |    |    |   |   |   |   |  |
| DHH subfamily 1 protein                           |            |       |        |        |            |       |        |        |              |       |        |        |             |       |        |        |               |       |        |        |                |       |        |        |                         |     |       |       |    |    |    |   |   |   |   |  |
| SGO_0850                                          | 0.386      | 6.736 | 0.0152 | 0.0673 | 1.562      | 7.506 | 0.0004 | 0.0004 | 2.383        | 8.256 | 0.0063 | 0.0348 | 1.176       | 7.105 | 0.0011 | 0.0020 | 1.997         | 7.200 | 0.0101 | 0.0422 | 0.821          | 8.115 | 0.0532 | 0.1238 |                         |     |       |       |    |    |    |   |   |   |   |  |
| flavodoxin                                        |            |       |        |        |            |       |        |        |              |       |        |        |             |       |        |        |               |       |        |        |                |       |        |        |                         |     |       |       |    |    |    |   |   |   |   |  |
| SGO_0851                                          | 1.157      | 4.915 | 0.0416 | 0.2304 | 0.281      | 4.984 | 0.1267 | 0.6444 |              | 3.898 |        |        | -0.875      | 4.486 | 0.0156 | 0.0837 |               | 2.807 |        |        |                | 3.551 |        |        |                         |     |       |       |    |    |    |   |   |   |   |  |
| putative permease                                 |            |       |        |        |            |       |        |        |              |       |        |        |             |       |        |        |               |       |        |        |                |       |        |        |                         |     |       |       |    |    |    |   |   |   |   |  |
| SGO_0852                                          | 0.346      | 5.338 | 0.0035 | 0.0103 | -0.862     | 4.813 | 0.0092 | 0.0300 |              | 4.156 |        |        | -1.209      | 4.527 | 0.0025 | 0.0071 |               | 3.376 |        |        |                | 2.848 |        |        |                         |     |       |       |    |    |    |   |   |   |   |  |
| TPR domain protein                                |            |       |        |        |            |       |        |        |              |       |        |        |             |       |        |        |               |       |        |        |                |       |        |        |                         |     |       |       |    |    |    |   |   |   |   |  |
| SGO_0853                                          | -0.298     | 5.096 | 0.0590 | 0.3462 | -0.638     | 4.965 | 0.0412 | 0.1775 |              | 4.288 |        |        | -0.340      | 4.208 | 0.0129 | 0.0661 |               | 2.751 |        |        |                | 3.036 |        |        |                         |     |       |       |    |    |    |   |   |   |   |  |
| budA; alpha-acetolactate decarboxylase            |            |       |        |        |            |       |        |        |              |       |        |        |             |       |        |        |               |       |        |        |                |       |        |        |                         |     |       |       |    |    |    |   |   |   |   |  |
| SGO_0854                                          | -2.737     | 9.701 | 0.0002 | 0.0001 | -5.332     | 9.527 | 0.0001 | 0.0000 | -5.415       | 9.525 | 0.0001 | 0.0000 | -2.595      | 6.521 | 0.0044 | 0.0160 | -2.678        | 5.896 | 0.0048 | 0.0152 | -0.083         | 4.618 | 0.1668 | 0.5698 |                         |     |       |       |    |    |    |   |   |   |   |  |
| cshA; surface-associated protein CshA             |            |       |        |        |            |       |        |        |              |       |        |        |             |       |        |        |               |       |        |        |                |       |        |        |                         |     |       |       |    |    |    |   |   |   |   |  |
| SGO_0855                                          | -0.735     | 5.591 | 0.0050 | 0.0161 | -0.453     | 5.699 | 0.0089 | 0.0287 |              | 4.908 |        |        | 0.282       | 4.813 | 0.0271 | 0.1633 |               | 3.061 |        |        |                | 3.941 |        |        |                         |     |       |       |    |    |    |   |   |   |   |  |
| fbpA; fibronectin-binding protein A               |            |       |        |        |            |       |        |        |              |       |        |        |             |       |        |        |               |       |        |        |                |       |        |        |                         |     |       |       |    |    |    |   |   |   |   |  |
| SGO_0856                                          | -3.308     | 8.206 | 0.0001 | 0.0000 | -1.459     | 8.517 | 0.0003 | 0.0003 | -2.301       | 8.333 | 0.0001 | 0.0000 | 1.850       | 6.458 | 0.0011 | 0.0021 | 1.007         | 5.228 | 0.0013 | 0.0022 | -0.843         | 6.741 | 0.0099 | 0.0084 |                         |     |       |       |    |    |    |   |   |   |   |  |
| ABC transporter, substrate binding protein        |            |       |        |        |            |       |        |        |              |       |        |        |             |       |        |        |               |       |        |        |                |       |        |        |                         |     |       |       |    |    |    |   |   |   |   |  |
| SGO_0858                                          |            | 3.727 |        |        |            | 3.727 |        |        |              | 3.727 |        |        |             |       |        |        |               |       |        |        |                |       |        |        |                         |     |       |       |    |    |    |   |   |   |   |  |
| ABC transporter, ATP-binding protein              |            |       |        |        |            |       |        |        |              |       |        |        |             |       |        |        |               |       |        |        |                |       |        |        |                         |     |       |       |    |    |    |   |   |   |   |  |
| SGO_0859                                          | 0.405      | 7.841 | 0.0093 | 0.0357 | -0.216     | 7.523 | 0.0440 | 0.1920 | -0.807       | 7.283 | 0.0037 | 0.0179 | -0.621      | 7.234 | 0.0007 | 0.0010 | -1.212        | 6.420 | 0.0006 | 0.0004 | -0.591         | 6.628 | 0.0101 | 0.0091 |                         |     |       |       |    |    |    |   |   |   |   |  |
| pheS; phenylalanyl-tRNA synthetase, alpha subunit |            |       |        |        |            |       |        |        |              |       |        |        |             |       |        |        |               |       |        |        |                |       |        |        |                         |     |       |       |    |    |    |   |   |   |   |  |
| SGO_0861                                          | -0.152     | 8.497 | 0.0448 | 0.2521 | 0.743      | 8.986 | 0.0008 | 0.0012 | 0.727        | 8.977 | 0.0010 | 0.0033 | 0.895       | 8.418 | 0.0007 | 0.0009 | 0.878         | 7.798 | 0.0013 | 0.0023 | -0.016         | 8.788 | 0.2193 | 0.8146 |                         |     |       |       |    |    |    |   |   |   |   |  |
| pheT; phenylalanyl-tRNA synthetase, beta subunit  |            |       |        |        |            |       |        |        |              |       |        |        |             |       |        |        |               |       |        |        |                |       |        |        |                         |     |       |       |    |    |    |   |   |   |   |  |
| SGO_0862                                          |            | 3.475 |        |        |            | 3.475 |        |        |              | 3.475 |        |        |             |       |        |        |               |       |        |        |                |       |        |        |                         |     |       |       |    |    |    |   |   |   |   |  |
| hypothetical protein SGO_0862                     |            |       |        |        |            |       |        |        |              |       |        |        |             |       |        |        |               |       |        |        |                |       |        |        |                         |     |       |       |    |    |    |   |   |   |   |  |
| SGO_0868                                          |            | 1.058 |        |        |            | 1.058 |        |        |              | 1.058 |        |        |             |       |        |        |               |       |        |        |                |       |        |        |                         |     |       |       |    |    |    |   |   |   |   |  |
| hypothetical protein SGO_0868                     |            |       |        |        |            |       |        |        |              |       |        |        |             |       |        |        |               |       |        |        |                |       |        |        |                         |     |       |       |    |    |    |   |   |   |   |  |
| SGO_0877                                          |            | 1.585 |        |        |            | 1.585 |        |        |              | 1.585 |        |        |             |       |        |        |               |       |        |        |                |       |        |        |                         |     |       |       |    |    |    |   |   |   |   |  |
| permease domain protein                           |            |       |        |        |            |       |        |        |              |       |        |        |             |       |        |        |               |       |        |        |                |       |        |        |                         |     |       |       |    |    |    |   |   |   |   |  |
| SGO_0885                                          | 0.700      | 6.064 | 0.0149 | 0.0652 | -0.639     | 5.374 | 0.0115 | 0.0390 | -0.567       | 5.403 | 0.0086 | 0.0525 | -1.339      | 5.333 | 0.0042 | 0.0146 | -1.267        | 4.744 | 0.0049 | 0.0163 | 0.072          | 4.529 | 0.1023 | 0.2951 |                         |     |       |       |    |    |    |   |   |   |   |  |
| cobyrinic acid synthase                           |            |       |        |        |            |       |        |        |              |       |        |        |             |       |        |        |               |       |        |        |                |       |        |        |                         |     |       |       |    |    |    |   |   |   |   |  |
| SGO_0886                                          | 0.806      | 5.586 | 0.0240 | 0.1154 | -0.777     | 4.851 | 0.0434 | 0.1880 |              | 4.225 |        |        | -1.583      | 4.790 | 0.0009 | 0.0015 |               | 3.751 |        |        |                | 2.830 |        |        |                         |     |       |       |    |    |    |   |   |   |   |  |
| Mur ligase family protein                         |            |       |        |        |            |       |        |        |              |       |        |        |             |       |        |        |               |       |        |        |                |       |        |        |                         |     |       |       |    |    |    |   |   |   |   |  |

Show detected proteins only  
 Show all proteins

Proteins found:  
1179

Dot Plots  
Dot Plots

Test

Cutoff

q-Value

p-Value

.005

| Signif | Direction | Applies To   |
|--------|-----------|--------------|
| yes    | +         | ratios, bars |
| no     | n/a       | bars         |
| yes    | -         | ratios, bars |
| yes    | +         | p-, q-Values |
| yes    | -         | p-, q-Values |

SgFn vs Sg —  
SgPgFn vs Sg —  
SgPgFn vs SgFn —

— SgPg vs Sg  
— SgPg vs SgFn  
— SgPgFn vs SgPg

Summary Table SgFn vs Sg SgPg vs Sg SgPgFn vs Sg SgPg v SgFn SgPgFn v SgFn SgPgFn vs SgPg Coverage

| Protein                                                  | SgFn vs Sg |       |        |        | SgPg vs Sg |       |        |        | SgPgFn vs Sg |       |        |        | SgPg v SgFn |       |        |        | SgPgFn v SgFn |       |        |        | SgPgFn vs SgPg |       |        |        | Log <sub>2</sub> Ratios |     |       |       |    |    |    |   |   |   |   |  |
|----------------------------------------------------------|------------|-------|--------|--------|------------|-------|--------|--------|--------------|-------|--------|--------|-------------|-------|--------|--------|---------------|-------|--------|--------|----------------|-------|--------|--------|-------------------------|-----|-------|-------|----|----|----|---|---|---|---|--|
|                                                          | Ratio      | Sum   | q-Val  | p-Val  | Ratio      | Sum   | q-Val  | p-Val  | Ratio        | Sum   | q-Val  | p-Val  | Ratio       | Sum   | q-Val  | p-Val  | Ratio         | Sum   | q-Val  | p-Val  | Ratio          | Sum   | q-Val  | p-Val  | Ratio                   | Sum | q-Val | p-Val | -6 | -4 | -2 | 0 | 2 | 4 | 6 |  |
| SGO_0887                                                 |            | 7.303 |        |        |            | 7.303 |        |        |              | 7.303 |        |        |             |       |        |        |               |       |        |        |                |       |        |        |                         |     |       |       |    |    |    |   |   |   |   |  |
| conserved hypothetical protein TIGR00159                 |            |       |        |        |            |       |        |        |              |       |        |        |             |       |        |        |               |       |        |        |                |       |        |        |                         |     |       |       |    |    |    |   |   |   |   |  |
| SGO_0888                                                 |            | 5.203 |        |        | -1.894     | 5.554 | 0.0025 | 0.0055 | -2.014       | 5.369 | 0.0175 | 0.1316 |             | 2.830 |        |        |               | 1.046 |        |        | -0.120         | 3.360 | 0.2049 | 0.7437 |                         |     |       |       |    |    |    |   |   |   |   |  |
| hypothetical protein SGO_0888                            |            |       |        |        |            |       |        |        |              |       |        |        |             |       |        |        |               |       |        |        |                |       |        |        |                         |     |       |       |    |    |    |   |   |   |   |  |
| SGO_0889                                                 | -0.553     | 6.939 | 0.0003 | 0.0003 | 0.013      | 7.195 | 0.1403 | 0.7211 | -0.844       | 6.839 | 0.0020 | 0.0083 | 0.566       | 6.433 | 0.0003 | 0.0003 | -0.291        | 5.387 | 0.0344 | 0.1939 | -0.857         | 6.334 | 0.0094 | 0.0079 |                         |     |       |       |    |    |    |   |   |   |   |  |
| glmM; phosphoglucosamine mutase                          |            |       |        |        |            |       |        |        |              |       |        |        |             |       |        |        |               |       |        |        |                |       |        |        |                         |     |       |       |    |    |    |   |   |   |   |  |
| SGO_0890                                                 | -1.796     | 8.439 | 0.0006 | 0.0010 |            | 8.059 |        |        |              | 8.059 |        |        |             | 5.817 |        |        |               | 5.206 |        |        |                |       |        |        |                         |     |       |       |    |    |    |   |   |   |   |  |
| LPXTG cell wall surface protein, collagen binding domain |            |       |        |        |            |       |        |        |              |       |        |        |             |       |        |        |               |       |        |        |                |       |        |        |                         |     |       |       |    |    |    |   |   |   |   |  |
| SGO_0893                                                 | 0.773      | 7.832 | 0.0005 | 0.0008 | 0.666      | 7.769 | 0.0040 | 0.0106 | 0.522        | 7.678 | 0.0010 | 0.0033 | -0.107      | 7.603 | 0.0440 | 0.2940 | -0.251        | 6.921 | 0.0001 | 0.0000 | -0.144         | 7.478 | 0.0694 | 0.1766 |                         |     |       |       |    |    |    |   |   |   |   |  |
| GTP-binding protein                                      |            |       |        |        |            |       |        |        |              |       |        |        |             |       |        |        |               |       |        |        |                |       |        |        |                         |     |       |       |    |    |    |   |   |   |   |  |
| SGO_0899                                                 |            | 3.334 |        |        |            | 3.334 |        |        |              | 3.334 |        |        |             |       |        |        |               |       |        |        |                |       |        |        |                         |     |       |       |    |    |    |   |   |   |   |  |
| putative hydrolase or acyltransferase                    |            |       |        |        |            |       |        |        |              |       |        |        |             |       |        |        |               |       |        |        |                |       |        |        |                         |     |       |       |    |    |    |   |   |   |   |  |
| SGO_0901                                                 | 0.594      | 6.466 | 0.0011 | 0.0021 | 0.470      | 6.395 | 0.0052 | 0.0150 | -0.769       | 5.823 | 0.0046 | 0.0238 | -0.125      | 6.162 | 0.0425 | 0.2819 | -1.363        | 5.098 | 0.0016 | 0.0033 | -1.239         | 5.624 | 0.0092 | 0.0073 |                         |     |       |       |    |    |    |   |   |   |   |  |
| DNA-directed DNA polymerase III                          |            |       |        |        |            |       |        |        |              |       |        |        |             |       |        |        |               |       |        |        |                |       |        |        |                         |     |       |       |    |    |    |   |   |   |   |  |
| SGO_0904                                                 |            | 1.058 |        |        |            | 1.058 |        |        |              | 1.058 |        |        |             |       |        |        |               |       |        |        |                |       |        |        |                         |     |       |       |    |    |    |   |   |   |   |  |
| purR; galactose operon repressor GalR                    |            |       |        |        |            |       |        |        |              |       |        |        |             |       |        |        |               |       |        |        |                |       |        |        |                         |     |       |       |    |    |    |   |   |   |   |  |
| SGO_0905                                                 |            | 4.857 |        |        |            | 4.857 |        |        |              | 4.857 |        |        |             |       |        |        |               |       |        |        |                |       |        |        |                         |     |       |       |    |    |    |   |   |   |   |  |
| lipoprotein, putative                                    |            |       |        |        |            |       |        |        |              |       |        |        |             |       |        |        |               |       |        |        |                |       |        |        |                         |     |       |       |    |    |    |   |   |   |   |  |
| SGO_0906                                                 | 3.270      | 8.067 | 0.0000 | 0.0000 | 1.999      | 6.978 | 0.0001 | 0.0000 | 1.830        | 6.859 | 0.0013 | 0.0047 | -1.270      | 7.911 | 0.0000 | 0.0000 | -1.439        | 7.258 | 0.0005 | 0.0004 | -0.169         | 7.067 | 0.1085 | 0.3157 |                         |     |       |       |    |    |    |   |   |   |   |  |
| leuA; 2-isopropylmalate synthase                         |            |       |        |        |            |       |        |        |              |       |        |        |             |       |        |        |               |       |        |        |                |       |        |        |                         |     |       |       |    |    |    |   |   |   |   |  |
| SGO_0907                                                 |            | 2.828 |        |        | 0.546      | 3.597 | 0.0772 | 0.3701 |              | 2.828 |        |        |             | 1.807 |        |        |               |       |        |        |                | 1.807 |        |        |                         |     |       |       |    |    |    |   |   |   |   |  |
| leuB; 3-isopropylmalate dehydrogenase                    |            |       |        |        |            |       |        |        |              |       |        |        |             |       |        |        |               |       |        |        |                |       |        |        |                         |     |       |       |    |    |    |   |   |   |   |  |
| SGO_0909                                                 |            | 4.074 |        |        |            | 2.683 |        |        |              |       |        |        | -0.372      | 4.027 | 0.0561 | 0.3851 |               | 2.951 |        |        |                | 2.170 |        |        |                         |     |       |       |    |    |    |   |   |   |   |  |
| leuC; 3-isopropylmalate dehydratase, large subunit       |            |       |        |        |            |       |        |        |              |       |        |        |             |       |        |        |               |       |        |        |                |       |        |        |                         |     |       |       |    |    |    |   |   |   |   |  |
| SGO_0911                                                 | 1.606      | 7.986 | 0.0001 | 0.0000 | 1.860      | 8.180 | 0.0001 | 0.0000 | 1.485        | 7.903 | 0.0009 | 0.0027 | 0.254       | 8.195 | 0.0012 | 0.0024 | -0.121        | 7.397 | 0.0554 | 0.3488 | -0.375         | 8.145 | 0.0196 | 0.0271 |                         |     |       |       |    |    |    |   |   |   |   |  |
| hypothetical protein SGO_0911                            |            |       |        |        |            |       |        |        |              |       |        |        |             |       |        |        |               |       |        |        |                |       |        |        |                         |     |       |       |    |    |    |   |   |   |   |  |
| SGO_0915                                                 |            | 4.909 |        |        | -1.047     | 5.481 | 0.0012 | 0.0021 |              | 4.909 |        |        |             | 3.357 |        |        |               |       |        |        |                | 3.357 |        |        |                         |     |       |       |    |    |    |   |   |   |   |  |
| proV; ABC-type proline/glycine betaine transporter       |            |       |        |        |            |       |        |        |              |       |        |        |             |       |        |        |               |       |        |        |                |       |        |        |                         |     |       |       |    |    |    |   |   |   |   |  |
| SGO_0916                                                 |            | 5.255 |        |        |            | 5.255 |        |        |              | 5.255 |        |        |             |       |        |        |               |       |        |        |                |       |        |        |                         |     |       |       |    |    |    |   |   |   |   |  |
| proWX; ABC transporter membrane-spanning permease        |            |       |        |        |            |       |        |        |              |       |        |        |             |       |        |        |               |       |        |        |                |       |        |        |                         |     |       |       |    |    |    |   |   |   |   |  |
| SGO_0932                                                 |            | 2.845 |        |        |            | 2.845 |        |        |              | 2.845 |        |        |             |       |        |        |               |       |        |        |                |       |        |        |                         |     |       |       |    |    |    |   |   |   |   |  |
| galK; galactokinase                                      |            |       |        |        |            |       |        |        |              |       |        |        |             |       |        |        |               |       |        |        |                |       |        |        |                         |     |       |       |    |    |    |   |   |   |   |  |

Show detected proteins only  
 Show all proteins

Proteins found:  
1179

Filter by category:  
ABC Transporter

Dot Plots  
Dot Plots

Test

Cutoff

q-Value

p-Value

.005

| Signif | Direction | Applies To   |
|--------|-----------|--------------|
| yes    | +         | ratios, bars |
| no     | n/a       | bars         |
| yes    | -         | ratios, bars |
| yes    | +         | p-, q-Values |
| yes    | -         | p-, q-Values |

SgFn vs Sg — — SgPg vs Sg  
SgPgFn vs Sg — — SgPg v SgFn  
SgPgFn vs SgFn — — SgPgFn vs SgPg  
SgPgFn vs SgPg — — SgPgFn vs SgPg



Summary Table SgFn vs Sg SgPg vs Sg SgPgFn vs Sg SgPg v SgFn SgPgFn v SgFn SgPgFn vs SgPg Coverage

| Protein                                               | SgFn vs Sg |       |        |        | SgPg vs Sg |       |        |        | SgPgFn vs Sg |       |        |        | SgPg v SgFn |       |        |        | SgPgFn v SgFn |       |        |        | SgPgFn vs SgPg |       |        |        | Log <sub>2</sub> Ratios |       |       |       |    |    |    |   |   |   |   |  |
|-------------------------------------------------------|------------|-------|--------|--------|------------|-------|--------|--------|--------------|-------|--------|--------|-------------|-------|--------|--------|---------------|-------|--------|--------|----------------|-------|--------|--------|-------------------------|-------|-------|-------|----|----|----|---|---|---|---|--|
|                                                       | Ratio      | Sum   | q-Val  | p-Val  | Ratio      | Sum   | q-Val  | p-Val  | Ratio        | Sum   | q-Val  | p-Val  | Ratio       | Sum   | q-Val  | p-Val  | Ratio         | Sum   | q-Val  | p-Val  | Ratio          | Sum   | q-Val  | p-Val  | Ratio                   | Sum   | q-Val | p-Val | -6 | -4 | -2 | 0 | 2 | 4 | 6 |  |
| SGO_0934                                              | -0.121     | 3.967 | 0.0745 | 0.4594 |            | 2.459 |        |        |              | 2.459 |        |        |             | 2.829 |        |        |               | 2.218 |        |        |                |       |        |        |                         |       |       |       |    |    |    |   |   |   |   |  |
| galE-2; UDP-glucose 4-epimerase                       |            |       |        |        |            |       |        |        |              |       |        |        |             |       |        |        |               |       |        |        |                |       |        |        |                         |       |       |       |    |    |    |   |   |   |   |  |
| SGO_0936                                              |            | 2.036 |        |        |            | 2.036 |        |        | 1.188        | 3.105 | 0.0184 | 0.1408 |             |       |        |        |               | 1.046 |        |        |                |       |        |        |                         | 1.657 |       |       |    |    |    |   |   |   |   |  |
| phosphoenolpyruvate synthase, putative                |            |       |        |        |            |       |        |        |              |       |        |        |             |       |        |        |               |       |        |        |                |       |        |        |                         |       |       |       |    |    |    |   |   |   |   |  |
| SGO_0938                                              |            |       |        |        |            |       |        |        |              | 2.718 |        |        |             |       |        |        |               | 1.594 |        |        |                |       |        |        |                         | 2.205 |       |       |    |    |    |   |   |   |   |  |
| Phosphatidylserine decarboxylase proenzyme 2          |            |       |        |        |            |       |        |        |              |       |        |        |             |       |        |        |               |       |        |        |                |       |        |        |                         |       |       |       |    |    |    |   |   |   |   |  |
| SGO_0940                                              |            | 3.894 |        |        |            | 3.894 |        |        | -0.447       | 4.331 | 0.0526 | 0.4634 |             |       |        |        |               | 1.272 |        |        |                |       |        |        |                         | 1.883 |       |       |    |    |    |   |   |   |   |  |
| ppsA; phosphoenolpyruvate synthase                    |            |       |        |        |            |       |        |        |              |       |        |        |             |       |        |        |               |       |        |        |                |       |        |        |                         |       |       |       |    |    |    |   |   |   |   |  |
| SGO_0941                                              |            | 1.322 |        |        |            | 1.322 |        |        |              | 1.322 |        |        |             |       |        |        |               |       |        |        |                |       |        |        |                         |       |       |       |    |    |    |   |   |   |   |  |
| hypothetical protein SGO_0941                         |            |       |        |        |            |       |        |        |              |       |        |        |             |       |        |        |               |       |        |        |                |       |        |        |                         |       |       |       |    |    |    |   |   |   |   |  |
| SGO_0942                                              |            | 5.201 |        |        |            | 5.201 |        |        |              | 5.201 |        |        |             |       |        |        |               |       |        |        |                |       |        |        |                         |       |       |       |    |    |    |   |   |   |   |  |
| zmpC; zinc metalloproteinase C                        |            |       |        |        |            |       |        |        |              |       |        |        |             |       |        |        |               |       |        |        |                |       |        |        |                         |       |       |       |    |    |    |   |   |   |   |  |
| SGO_0944                                              |            | 5.012 |        |        |            | 5.012 |        |        |              | 5.012 |        |        |             |       |        |        |               |       |        |        |                |       |        |        |                         |       |       |       |    |    |    |   |   |   |   |  |
| ABC transporter, ATP-binding protein                  |            |       |        |        |            |       |        |        |              |       |        |        |             |       |        |        |               |       |        |        |                |       |        |        |                         |       |       |       |    |    |    |   |   |   |   |  |
| SGO_0946                                              | 0.714      | 7.288 | 0.0005 | 0.0007 | -0.217     | 6.786 | 0.0285 | 0.1162 | -0.622       | 6.632 | 0.0098 | 0.0625 | -0.931      | 6.698 | 0.0008 | 0.0011 | -1.336        | 5.975 | 0.0016 | 0.0033 | -0.405         | 5.997 | 0.0811 | 0.2141 |                         |       |       |       |    |    |    |   |   |   |   |  |
| Deblocking aminopeptidase                             |            |       |        |        |            |       |        |        |              |       |        |        |             |       |        |        |               |       |        |        |                |       |        |        |                         |       |       |       |    |    |    |   |   |   |   |  |
| SGO_0948                                              | 0.086      | 6.180 | 0.0837 | 0.5279 |            | 5.141 |        |        |              | 5.141 |        |        |             | 4.705 |        |        |               | 4.094 |        |        |                |       |        |        |                         |       |       |       |    |    |    |   |   |   |   |  |
| pgdA; peptidoglycan N-acetylglucosamine deacetylase A |            |       |        |        |            |       |        |        |              |       |        |        |             |       |        |        |               |       |        |        |                |       |        |        |                         |       |       |       |    |    |    |   |   |   |   |  |
| SGO_0949                                              | -0.475     | 5.295 | 0.0377 | 0.2032 | -0.476     | 5.268 | 0.0151 | 0.0552 | -0.757       | 4.862 | 0.0284 | 0.2286 | -0.001      | 4.522 | 0.1088 | 0.8182 | -0.281        | 3.421 | 0.0875 | 0.6042 | -0.280         | 3.985 | 0.0869 | 0.2354 |                         |       |       |       |    |    |    |   |   |   |   |  |
| deaD; DEAD RNA helicase                               |            |       |        |        |            |       |        |        |              |       |        |        |             |       |        |        |               |       |        |        |                |       |        |        |                         |       |       |       |    |    |    |   |   |   |   |  |
| SGO_0950                                              | 1.300      | 5.753 | 0.0324 | 0.1703 | -0.275     | 4.609 | 0.1251 | 0.6319 | -0.774       | 3.834 |        |        | -1.575      | 5.402 | 0.0029 | 0.0089 | -2.074        | 4.525 | 0.0255 | 0.1345 | -0.499         | 3.856 | 0.1382 | 0.4363 |                         |       |       |       |    |    |    |   |   |   |   |  |
| oxidoreductase                                        |            |       |        |        |            |       |        |        |              |       |        |        |             |       |        |        |               |       |        |        |                |       |        |        |                         |       |       |       |    |    |    |   |   |   |   |  |
| SGO_0951                                              | 0.064      | 6.011 | 0.1114 | 0.7288 | -0.138     | 5.905 | 0.0714 | 0.3362 | -0.083       | 5.935 | 0.0662 | 0.6035 | -0.202      | 5.426 | 0.0329 | 0.2049 | -0.146        | 4.844 | 0.0608 | 0.3924 | 0.056          | 5.347 | 0.1726 | 0.5963 |                         |       |       |       |    |    |    |   |   |   |   |  |
| udk; uridine kinase                                   |            |       |        |        |            |       |        |        |              |       |        |        |             |       |        |        |               |       |        |        |                |       |        |        |                         |       |       |       |    |    |    |   |   |   |   |  |
| SGO_0953                                              |            |       |        |        |            | 5.155 |        |        |              | 4.642 |        |        |             |       |        |        |               |       |        |        |                | 4.642 |        |        |                         |       |       |       |    |    |    |   |   |   |   |  |
| endoribonuclease L-PSP, putative                      |            |       |        |        |            |       |        |        |              |       |        |        |             |       |        |        |               |       |        |        |                |       |        |        |                         |       |       |       |    |    |    |   |   |   |   |  |
| SGO_0954                                              | 0.510      | 6.460 | 0.0041 | 0.0126 | 0.095      | 6.263 | 0.1169 | 0.5847 | 0.496        | 6.475 | 0.0164 | 0.1211 | -0.415      | 6.016 | 0.0367 | 0.2361 | -0.015        | 5.584 | 0.1274 | 0.9148 | 0.400          | 6.031 | 0.1104 | 0.3269 |                         |       |       |       |    |    |    |   |   |   |   |  |
| ATP-binding protein                                   |            |       |        |        |            |       |        |        |              |       |        |        |             |       |        |        |               |       |        |        |                |       |        |        |                         |       |       |       |    |    |    |   |   |   |   |  |
| SGO_0955                                              | -0.040     | 4.797 | 0.1102 | 0.7184 | 0.411      | 4.555 | 0.0759 | 0.3630 |              | 3.830 |        |        | 0.451       | 4.001 | 0.0127 | 0.0640 |               | 2.639 |        |        |                | 2.700 |        |        |                         |       |       |       |    |    |    |   |   |   |   |  |
| transporter                                           |            |       |        |        |            |       |        |        |              |       |        |        |             |       |        |        |               |       |        |        |                |       |        |        |                         |       |       |       |    |    |    |   |   |   |   |  |
| SGO_0957                                              | -2.699     | 5.625 | 0.0124 | 0.0518 |            | 5.518 |        |        |              | 5.518 |        |        |             | 1.302 |        |        |               | 0.692 |        |        |                |       |        |        |                         |       |       |       |    |    |    |   |   |   |   |  |
| hypothetical protein SGO_0957                         |            |       |        |        |            |       |        |        |              |       |        |        |             |       |        |        |               |       |        |        |                |       |        |        |                         |       |       |       |    |    |    |   |   |   |   |  |

Show detected proteins only  
 Show all proteins

Proteins found:  
1179

Filter by category:

ABC Transporter

Dot Plots

Dot Plots

Test

Cutoff

q-Value

.005

p-Value

| Signif | Direction | Applies To   |
|--------|-----------|--------------|
| yes    | +         | ratios, bars |
| no     | n/a       | bars         |
| yes    | -         | ratios, bars |
| yes    | +         | p-, q-Values |
| yes    | -         | p-, q-Values |

SgFn vs Sg — — SgPg vs Sg  
SgPgFn vs Sg — — SgPg vs SgFn  
SgPgFn vs SgFn — — SgPgFn vs SgPg

Summary Table SgFn vs Sg SgPg vs Sg SgPgFn vs Sg SgPg v SgFn SgPgFn v SgFn SgPgFn vs SgPg Coverage

| Protein                                                | SgFn vs Sg |       |        |        | SgPg vs Sg |       |        |        | SgPgFn vs Sg |       |        |        | SgPg v SgFn |       |        |        | SgPgFn v SgFn |       |        |        | SgPgFn vs SgPg |       |        |        | Log <sub>2</sub> Ratios |     |       |       |    |    |    |   |   |   |   |  |
|--------------------------------------------------------|------------|-------|--------|--------|------------|-------|--------|--------|--------------|-------|--------|--------|-------------|-------|--------|--------|---------------|-------|--------|--------|----------------|-------|--------|--------|-------------------------|-----|-------|-------|----|----|----|---|---|---|---|--|
|                                                        | Ratio      | Sum   | q-Val  | p-Val  | Ratio      | Sum   | q-Val  | p-Val  | Ratio        | Sum   | q-Val  | p-Val  | Ratio       | Sum   | q-Val  | p-Val  | Ratio         | Sum   | q-Val  | p-Val  | Ratio          | Sum   | q-Val  | p-Val  | Ratio                   | Sum | q-Val | p-Val | -6 | -4 | -2 | 0 | 2 | 4 | 6 |  |
| SGO_0959                                               | 2.052      | 5.945 | 0.0046 | 0.0144 | 0.527      | 4.866 | 0.0492 | 0.2185 |              | 3.624 |        |        | -1.525      | 5.534 | 0.0049 | 0.0184 |               | 4.499 |        |        |                | 3.560 |        |        |                         |     |       |       |    |    |    |   |   |   |   |  |
| copper homeostasis protein CutC                        |            |       |        |        |            |       |        |        |              |       |        |        |             |       |        |        |               |       |        |        |                |       |        |        |                         |     |       |       |    |    |    |   |   |   |   |  |
| SGO_0961                                               |            | 3.776 |        |        |            | 3.776 |        |        |              | 3.776 |        |        |             |       |        |        |               |       |        |        |                |       |        |        |                         |     |       |       |    |    |    |   |   |   |   |  |
| ABC transporter, permease/ATP-binding protein          |            |       |        |        |            |       |        |        |              |       |        |        |             |       |        |        |               |       |        |        |                |       |        |        |                         |     |       |       |    |    |    |   |   |   |   |  |
| SGO_0962                                               |            | 1.841 |        |        |            | 1.841 |        |        |              | 1.841 |        |        |             |       |        |        |               |       |        |        |                |       |        |        |                         |     |       |       |    |    |    |   |   |   |   |  |
| ABC transporter, permease/ATP-binding protein          |            |       |        |        |            |       |        |        |              |       |        |        |             |       |        |        |               |       |        |        |                |       |        |        |                         |     |       |       |    |    |    |   |   |   |   |  |
| SGO_0966                                               | -1.271     | 6.593 | 0.0003 | 0.0003 |            | 6.093 |        |        |              | 6.093 |        |        |             | 4.307 |        |        |               | 3.696 |        |        |                |       |        |        |                         |     |       |       |    |    |    |   |   |   |   |  |
| hsa; streptococcal hemagglutinin                       |            |       |        |        |            |       |        |        |              |       |        |        |             |       |        |        |               |       |        |        |                |       |        |        |                         |     |       |       |    |    |    |   |   |   |   |  |
| SGO_0969                                               | 0.191      | 3.585 | 0.0379 | 0.2044 |            | 2.934 |        |        |              | 2.934 |        |        |             | 1.611 |        |        |               | 1.000 |        |        |                |       |        |        |                         |     |       |       |    |    |    |   |   |   |   |  |
| nss; nucleotide sugar synthetase-like protein          |            |       |        |        |            |       |        |        |              |       |        |        |             |       |        |        |               |       |        |        |                |       |        |        |                         |     |       |       |    |    |    |   |   |   |   |  |
| SGO_0971                                               |            | 2.609 |        |        |            | 2.609 |        |        |              | 2.609 |        |        |             |       |        |        |               |       |        |        |                |       |        |        |                         |     |       |       |    |    |    |   |   |   |   |  |
| asp1; accessory secretory protein                      |            |       |        |        |            |       |        |        |              |       |        |        |             |       |        |        |               |       |        |        |                |       |        |        |                         |     |       |       |    |    |    |   |   |   |   |  |
| SGO_0972                                               |            | 1.585 |        |        |            | 1.585 |        |        |              | 1.585 |        |        |             |       |        |        |               |       |        |        |                |       |        |        |                         |     |       |       |    |    |    |   |   |   |   |  |
| asp2; accessory secretory protein                      |            |       |        |        |            |       |        |        |              |       |        |        |             |       |        |        |               |       |        |        |                |       |        |        |                         |     |       |       |    |    |    |   |   |   |   |  |
| SGO_0975                                               |            | 3.272 |        |        |            | 3.272 |        |        |              | 3.272 |        |        |             |       |        |        |               |       |        |        |                |       |        |        |                         |     |       |       |    |    |    |   |   |   |   |  |
| gtaA; glycosyl transferase, group 1 SP1758             |            |       |        |        |            |       |        |        |              |       |        |        |             |       |        |        |               |       |        |        |                |       |        |        |                         |     |       |       |    |    |    |   |   |   |   |  |
| SGO_0979                                               |            | 3.279 |        |        |            | 3.279 |        |        |              | 3.279 |        |        |             |       |        |        |               |       |        |        |                |       |        |        |                         |     |       |       |    |    |    |   |   |   |   |  |
| degV family protein                                    |            |       |        |        |            |       |        |        |              |       |        |        |             |       |        |        |               |       |        |        |                |       |        |        |                         |     |       |       |    |    |    |   |   |   |   |  |
| SGO_0980                                               |            | 0.643 |        |        |            | 0.643 |        |        |              | 0.643 |        |        |             |       |        |        |               |       |        |        |                |       |        |        |                         |     |       |       |    |    |    |   |   |   |   |  |
| transcriptional regulator, TetR family domain protein  |            |       |        |        |            |       |        |        |              |       |        |        |             |       |        |        |               |       |        |        |                |       |        |        |                         |     |       |       |    |    |    |   |   |   |   |  |
| SGO_0981                                               | -1.139     | 4.303 | 0.0531 | 0.3053 | -0.793     | 4.371 | 0.0772 | 0.3697 |              | 4.020 |        |        | 0.346       | 2.486 |        |        |               | 0.692 |        |        |                | 1.648 |        |        |                         |     |       |       |    |    |    |   |   |   |   |  |
| comE operon protein 2 family                           |            |       |        |        |            |       |        |        |              |       |        |        |             |       |        |        |               |       |        |        |                |       |        |        |                         |     |       |       |    |    |    |   |   |   |   |  |
| SGO_0982                                               | -2.577     | 8.302 | 0.0002 | 0.0002 | -2.052     | 8.392 | 0.0004 | 0.0003 | -3.500       | 8.201 | 0.0002 | 0.0002 | 0.524       | 6.278 | 0.0049 | 0.0186 | -0.924        | 4.987 | 0.0004 | 0.0002 | -1.448         | 5.968 | 0.0050 | 0.0022 |                         |     |       |       |    |    |    |   |   |   |   |  |
| amino acid ABC transporter, amino acid-binding protein |            |       |        |        |            |       |        |        |              |       |        |        |             |       |        |        |               |       |        |        |                |       |        |        |                         |     |       |       |    |    |    |   |   |   |   |  |
| SGO_0983                                               |            | 5.795 |        |        | -3.281     | 5.868 | 0.0096 | 0.0314 |              | 5.795 |        |        |             | 1.000 |        |        |               | 1.000 |        |        |                |       |        |        |                         |     |       |       |    |    |    |   |   |   |   |  |
| amino acid ABC transporter, ATP-binding protein SP0709 |            |       |        |        |            |       |        |        |              |       |        |        |             |       |        |        |               |       |        |        |                |       |        |        |                         |     |       |       |    |    |    |   |   |   |   |  |
| SGO_0986                                               |            | 3.992 |        |        |            | 3.992 |        |        |              | 3.992 |        |        |             |       |        |        |               |       |        |        |                |       |        |        |                         |     |       |       |    |    |    |   |   |   |   |  |
| hypothetical protein SGO_0986                          |            |       |        |        |            |       |        |        |              |       |        |        |             |       |        |        |               |       |        |        |                |       |        |        |                         |     |       |       |    |    |    |   |   |   |   |  |
| SGO_0987                                               | 0.344      | 7.742 | 0.0021 | 0.0052 | 0.274      | 7.714 | 0.0366 | 0.1563 | 0.420        | 7.786 | 0.0008 | 0.0021 | -0.070      | 7.365 | 0.0982 | 0.7269 | 0.076         | 6.818 | 0.0052 | 0.0176 | 0.146          | 7.404 | 0.1271 | 0.3950 |                         |     |       |       |    |    |    |   |   |   |   |  |
| metK; S-adenosylmethionine synthetase                  |            |       |        |        |            |       |        |        |              |       |        |        |             |       |        |        |               |       |        |        |                |       |        |        |                         |     |       |       |    |    |    |   |   |   |   |  |
| SGO_0991                                               |            | 6.865 |        |        | 1.525      | 8.820 |        |        |              | 6.865 |        |        |             | 7.877 |        |        |               |       |        |        |                | 7.877 |        |        |                         |     |       |       |    |    |    |   |   |   |   |  |
| hypothetical protein SGO_0991                          |            |       |        |        |            |       |        |        |              |       |        |        |             |       |        |        |               |       |        |        |                |       |        |        |                         |     |       |       |    |    |    |   |   |   |   |  |

Show detected proteins only  
 Show all proteins

Proteins found:  
1179

Dot Plots  
Dot Plots

Test

Cutoff

q-Value

p-Value

.005

| Signif | Direction | Applies To   |
|--------|-----------|--------------|
| yes    | +         | ratios, bars |
| no     | n/a       | bars         |
| yes    | -         | ratios, bars |
| yes    | +         | p-, q-Values |
| yes    | -         | p-, q-Values |

SgFn vs Sg —  
SgPgFn vs Sg —  
SgPgFn vs SgFn —  
SgPg vs Sg —  
SgPg vs SgFn —  
SgPgFn vs SgPg —

Summary Table SgFn vs Sg SgPg vs Sg SgPgFn vs Sg SgPg v SgFn SgPgFn v SgFn SgPgFn vs SgPg Coverage

| Protein                                                    | SgFn vs Sg |       |        |        | SgPg vs Sg |       |        |        | SgPgFn vs Sg |       |        |        | SgPg v SgFn |       |        |        | SgPgFn v SgFn |       |        |        | SgPgFn vs SgPg |       |        |        | Log <sub>2</sub> Ratios |     |       |       |    |    |    |   |   |   |   |  |
|------------------------------------------------------------|------------|-------|--------|--------|------------|-------|--------|--------|--------------|-------|--------|--------|-------------|-------|--------|--------|---------------|-------|--------|--------|----------------|-------|--------|--------|-------------------------|-----|-------|-------|----|----|----|---|---|---|---|--|
|                                                            | Ratio      | Sum   | q-Val  | p-Val  | Ratio      | Sum   | q-Val  | p-Val  | Ratio        | Sum   | q-Val  | p-Val  | Ratio       | Sum   | q-Val  | p-Val  | Ratio         | Sum   | q-Val  | p-Val  | Ratio          | Sum   | q-Val  | p-Val  | Ratio                   | Sum | q-Val | p-Val | -6 | -4 | -2 | 0 | 2 | 4 | 6 |  |
| <b>SGO_0993</b>                                            |            | 3.772 |        |        |            | 2.098 |        |        |              | 2.396 |        |        | -0.644      | 3.652 | 0.0469 | 0.3163 | -0.346        | 3.118 | 0.0694 | 0.4602 | 0.298          | 2.742 |        |        |                         |     |       |       |    |    |    |   |   |   |   |  |
| GTP-binding protein HflX                                   |            |       |        |        |            |       |        |        |              |       |        |        |             |       |        |        |               |       |        |        |                |       |        |        |                         |     |       |       |    |    |    |   |   |   |   |  |
| <b>SGO_0994</b>                                            |            | 2.718 |        |        | 0.996      | 4.243 | 0.0136 | 0.0479 |              | 2.718 |        |        |             | 3.114 |        |        |               |       |        |        |                | 3.114 |        |        |                         |     |       |       |    |    |    |   |   |   |   |  |
| hypothetical protein SGO_0994                              |            |       |        |        |            |       |        |        |              |       |        |        |             |       |        |        |               |       |        |        |                |       |        |        |                         |     |       |       |    |    |    |   |   |   |   |  |
| <b>SGO_0995</b>                                            | 1.419      | 6.066 | 0.0067 | 0.0234 | 0.171      | 5.395 | 0.1330 | 0.6801 | -0.740       | 4.614 | 0.0526 | 0.4645 | -1.248      | 5.629 | 0.0117 | 0.0566 | -2.159        | 4.605 | 0.0271 | 0.1436 | -0.910         | 4.300 | 0.1485 | 0.4762 |                         |     |       |       |    |    |    |   |   |   |   |  |
| metallo-beta-lactamase superfamily protein                 |            |       |        |        |            |       |        |        |              |       |        |        |             |       |        |        |               |       |        |        |                |       |        |        |                         |     |       |       |    |    |    |   |   |   |   |  |
| <b>SGO_0996</b>                                            |            | 3.351 |        |        |            | 3.351 |        |        |              | 3.351 |        |        |             |       |        |        |               |       |        |        |                |       |        |        |                         |     |       |       |    |    |    |   |   |   |   |  |
| oxidoreductase, short-chain dehydrogenase/reductase family |            |       |        |        |            |       |        |        |              |       |        |        |             |       |        |        |               |       |        |        |                |       |        |        |                         |     |       |       |    |    |    |   |   |   |   |  |
| <b>SGO_0997</b>                                            | -0.144     | 5.713 | 0.0609 | 0.3621 | -1.025     | 5.451 | 0.0317 | 0.1312 |              | 4.781 |        |        | -0.881      | 4.852 | 0.0342 | 0.2148 |               | 3.519 |        |        |                | 3.508 |        |        |                         |     |       |       |    |    |    |   |   |   |   |  |
| hypothetical protein SGO_0997                              |            |       |        |        |            |       |        |        |              |       |        |        |             |       |        |        |               |       |        |        |                |       |        |        |                         |     |       |       |    |    |    |   |   |   |   |  |
| <b>SGO_1000</b>                                            | 2.968      | 5.438 | 0.0074 | 0.0270 | 1.958      | 4.529 | 0.0329 | 0.1379 |              | 1.380 |        |        | -1.010      | 5.423 | 0.0013 | 0.0025 |               | 4.224 |        |        |                | 3.844 |        |        |                         |     |       |       |    |    |    |   |   |   |   |  |
| recJ; single-stranded-DNA-specific exonuclease RecJ        |            |       |        |        |            |       |        |        |              |       |        |        |             |       |        |        |               |       |        |        |                |       |        |        |                         |     |       |       |    |    |    |   |   |   |   |  |
| <b>SGO_1001</b>                                            | 1.289      | 8.028 | 0.0064 | 0.0223 | 1.111      | 7.883 | 0.0025 | 0.0058 | 0.748        | 7.654 | 0.0066 | 0.0376 | -0.178      | 7.924 | 0.0588 | 0.4071 | -0.540        | 7.161 | 0.0225 | 0.1147 | -0.363         | 7.652 | 0.0482 | 0.1077 |                         |     |       |       |    |    |    |   |   |   |   |  |
| apt; adenine phosphoribosyltransferase                     |            |       |        |        |            |       |        |        |              |       |        |        |             |       |        |        |               |       |        |        |                |       |        |        |                         |     |       |       |    |    |    |   |   |   |   |  |
| <b>SGO_1002</b>                                            |            | 1.000 |        |        |            | 1.000 |        |        |              | 1.000 |        |        |             |       |        |        |               |       |        |        |                |       |        |        |                         |     |       |       |    |    |    |   |   |   |   |  |
| metA; homoserine O-succinyltransferase                     |            |       |        |        |            |       |        |        |              |       |        |        |             |       |        |        |               |       |        |        |                |       |        |        |                         |     |       |       |    |    |    |   |   |   |   |  |
| <b>SGO_1003</b>                                            | -0.915     | 5.035 | 0.0023 | 0.0059 | 0.078      | 5.464 | 0.1208 | 0.6096 |              | 4.424 |        |        | 0.993       | 4.573 | 0.0021 | 0.0054 |               | 2.376 |        |        |                | 3.989 |        |        |                         |     |       |       |    |    |    |   |   |   |   |  |
| DNA replication protein DnaD                               |            |       |        |        |            |       |        |        |              |       |        |        |             |       |        |        |               |       |        |        |                |       |        |        |                         |     |       |       |    |    |    |   |   |   |   |  |
| <b>SGO_1004</b>                                            | 0.470      | 3.945 | 0.0697 | 0.4252 | 1.083      | 4.433 | 0.0635 | 0.2929 |              | 2.000 |        |        | 0.613       | 4.345 | 0.0244 | 0.1438 |               | 2.387 |        |        |                | 3.625 |        |        |                         |     |       |       |    |    |    |   |   |   |   |  |
| glutathione S-transferase family protein                   |            |       |        |        |            |       |        |        |              |       |        |        |             |       |        |        |               |       |        |        |                |       |        |        |                         |     |       |       |    |    |    |   |   |   |   |  |
| <b>SGO_1005</b>                                            | 0.530      | 5.015 | 0.0122 | 0.0505 | 0.994      | 5.306 | 0.0039 | 0.0102 | 0.682        | 5.098 | 0.0013 | 0.0047 | 0.464       | 4.993 | 0.0129 | 0.0658 | 0.152         | 4.203 | 0.0501 | 0.3034 | -0.311         | 5.052 | 0.0394 | 0.0786 |                         |     |       |       |    |    |    |   |   |   |   |  |
| Bcl-2 family protein                                       |            |       |        |        |            |       |        |        |              |       |        |        |             |       |        |        |               |       |        |        |                |       |        |        |                         |     |       |       |    |    |    |   |   |   |   |  |
| <b>SGO_1006</b>                                            | 0.802      | 2.778 |        |        | 0.787      | 3.497 | 0.0576 | 0.2617 |              | 1.322 |        |        | -0.015      | 3.203 | 0.1268 | 0.9734 |               | 1.000 |        |        |                | 2.622 |        |        |                         |     |       |       |    |    |    |   |   |   |   |  |
| conserved hypothetical protein TIGR00486                   |            |       |        |        |            |       |        |        |              |       |        |        |             |       |        |        |               |       |        |        |                |       |        |        |                         |     |       |       |    |    |    |   |   |   |   |  |
| <b>SGO_1007</b>                                            |            |       |        |        |            | 2.854 |        |        |              |       |        |        |             | 2.341 |        |        |               |       |        |        |                | 2.341 |        |        |                         |     |       |       |    |    |    |   |   |   |   |  |
| oxidoreductase, DadA family protein SP1608                 |            |       |        |        |            |       |        |        |              |       |        |        |             |       |        |        |               |       |        |        |                |       |        |        |                         |     |       |       |    |    |    |   |   |   |   |  |
| <b>SGO_1009</b>                                            | 2.074      | 9.379 | 0.0003 | 0.0003 | 1.501      | 8.934 | 0.0003 | 0.0002 | 1.149        | 8.693 | 0.0021 | 0.0088 | -0.573      | 9.300 | 0.0019 | 0.0047 | -0.925        | 8.563 | 0.0020 | 0.0047 | -0.352         | 8.825 | 0.0358 | 0.0687 |                         |     |       |       |    |    |    |   |   |   |   |  |
| rfbA-1; glucose-1-phosphate thymidyltransferase            |            |       |        |        |            |       |        |        |              |       |        |        |             |       |        |        |               |       |        |        |                |       |        |        |                         |     |       |       |    |    |    |   |   |   |   |  |
| <b>SGO_1010</b>                                            | 0.815      | 7.342 | 0.0017 | 0.0041 | 0.919      | 7.414 | 0.0033 | 0.0084 | 0.915        | 7.403 | 0.0001 | 0.0001 | 0.105       | 7.238 | 0.0678 | 0.4775 | 0.100         | 6.619 | 0.0511 | 0.3146 | -0.004         | 7.284 | 0.2348 | 0.8913 |                         |     |       |       |    |    |    |   |   |   |   |  |
| rmIC; dTDP-4-keto-6-deoxyglucose-3,5-epimerase             |            |       |        |        |            |       |        |        |              |       |        |        |             |       |        |        |               |       |        |        |                |       |        |        |                         |     |       |       |    |    |    |   |   |   |   |  |
| <b>SGO_1011</b>                                            | 2.376      | 9.181 | 0.0022 | 0.0055 | 1.150      | 8.223 | 0.0022 | 0.0049 | 0.641        | 7.895 | 0.0064 | 0.0362 | -1.226      | 8.918 | 0.0039 | 0.0133 | -1.735        | 8.174 | 0.0028 | 0.0076 | -0.510         | 7.930 | 0.0092 | 0.0074 |                         |     |       |       |    |    |    |   |   |   |   |  |
| rfbB-1; dTDP-glucose 4,6-dehydratase                       |            |       |        |        |            |       |        |        |              |       |        |        |             |       |        |        |               |       |        |        |                |       |        |        |                         |     |       |       |    |    |    |   |   |   |   |  |

Show detected proteins only  
 Show all proteins

Proteins found:  
1179

Dot Plots  
Dot Plots

Test

Cutoff

q-Value

p-Value

.005

| Signif | Direction | Applies To   |
|--------|-----------|--------------|
| yes    | +         | ratios, bars |
| no     | n/a       | bars         |
| yes    | -         | ratios, bars |
| yes    | +         | p-, q-Values |
| yes    | -         | p-, q-Values |

SgFn vs Sg — — SgPg vs Sg  
SgPgFn vs Sg — — SgPg vs SgFn  
SgPgFn vs SgFn — — SgPgFn vs SgPg

Summary Table SgFn vs Sg SgPg vs Sg SgPgFn vs Sg SgPg v SgFn SgPgFn v SgFn SgPgFn vs SgPg Coverage

| Protein                                              | SgFn vs Sg |       |        |        | SgPg vs Sg |       |        |        | SgPgFn vs Sg |       |        |        | SgPg v SgFn |       |        |        | SgPgFn v SgFn |       |        |        | SgPgFn vs SgPg |       |        |        | Log <sub>2</sub> Ratios |     |       |       |    |    |    |   |   |   |   |  |
|------------------------------------------------------|------------|-------|--------|--------|------------|-------|--------|--------|--------------|-------|--------|--------|-------------|-------|--------|--------|---------------|-------|--------|--------|----------------|-------|--------|--------|-------------------------|-----|-------|-------|----|----|----|---|---|---|---|--|
|                                                      | Ratio      | Sum   | q-Val  | p-Val  | Ratio      | Sum   | q-Val  | p-Val  | Ratio        | Sum   | q-Val  | p-Val  | Ratio       | Sum   | q-Val  | p-Val  | Ratio         | Sum   | q-Val  | p-Val  | Ratio          | Sum   | q-Val  | p-Val  | Ratio                   | Sum | q-Val | p-Val | -6 | -4 | -2 | 0 | 2 | 4 | 6 |  |
| <b>SGO_1012</b>                                      | 1.633      | 9.235 | 0.0001 | 0.0000 | 0.993      | 8.779 | 0.0001 | 0.0000 | 0.585        | 8.521 | 0.0002 | 0.0002 | -0.640      | 9.034 | 0.0002 | 0.0001 | -1.048        | 8.277 | 0.0001 | 0.0000 | -0.408         | 8.489 | 0.0012 | 0.0001 |                         |     |       |       |    |    |    |   |   |   |   |  |
| galE-1; UDP-glucose 4-epimerase                      |            |       |        |        |            |       |        |        |              |       |        |        |             |       |        |        |               |       |        |        |                |       |        |        |                         |     |       |       |    |    |    |   |   |   |   |  |
| <b>SGO_1013</b>                                      | -2.184     | 6.159 | 0.0202 | 0.0930 | -2.901     | 6.102 | 0.0214 | 0.0839 | -1.144       | 6.302 | 0.0175 | 0.1311 | -0.717      | 2.988 |        |        | 1.040         | 3.303 |        |        | 1.757          | 3.716 |        |        |                         |     |       |       |    |    |    |   |   |   |   |  |
| Glycosyltransferase involved in cell wall biogenesis |            |       |        |        |            |       |        |        |              |       |        |        |             |       |        |        |               |       |        |        |                |       |        |        |                         |     |       |       |    |    |    |   |   |   |   |  |
| <b>SGO_1016</b>                                      | -1.977     | 5.619 | 0.0303 | 0.1580 | -1.298     | 5.936 | 0.0047 | 0.0130 | -1.705       | 5.652 | 0.0215 | 0.1691 | 0.679       | 4.010 | 0.0282 | 0.1722 | 0.272         | 2.464 |        |        | -0.407         | 4.079 | 0.0910 | 0.2534 |                         |     |       |       |    |    |    |   |   |   |   |  |
| putative glycosyltransferase                         |            |       |        |        |            |       |        |        |              |       |        |        |             |       |        |        |               |       |        |        |                |       |        |        |                         |     |       |       |    |    |    |   |   |   |   |  |
| <b>SGO_1018</b>                                      |            | 3.669 |        |        |            | 3.669 |        |        |              | 3.669 |        |        |             |       |        |        |               |       |        |        |                |       |        |        |                         |     |       |       |    |    |    |   |   |   |   |  |
| hypothetical protein SGO_1018                        |            |       |        |        |            |       |        |        |              |       |        |        |             |       |        |        |               |       |        |        |                |       |        |        |                         |     |       |       |    |    |    |   |   |   |   |  |
| <b>SGO_1019</b>                                      | -2.526     | 6.462 | 0.0035 | 0.0105 | -2.504     | 6.579 | 0.0001 | 0.0000 | -3.361       | 6.410 | 0.0023 | 0.0096 | 0.022       | 3.918 | 0.1180 | 0.8916 | -0.835        | 2.334 |        |        | -0.856         | 3.694 | 0.0874 | 0.2378 |                         |     |       |       |    |    |    |   |   |   |   |  |
| glycosyl transferase                                 |            |       |        |        |            |       |        |        |              |       |        |        |             |       |        |        |               |       |        |        |                |       |        |        |                         |     |       |       |    |    |    |   |   |   |   |  |
| <b>SGO_1020</b>                                      | 1.139      | 7.938 | 0.0003 | 0.0002 | 0.660      | 7.639 | 0.0101 | 0.0334 | 0.517        | 7.544 | 0.0030 | 0.0137 | -0.479      | 7.674 | 0.0085 | 0.0391 | -0.622        | 6.999 | 0.0020 | 0.0046 | -0.143         | 7.350 | 0.1361 | 0.4272 |                         |     |       |       |    |    |    |   |   |   |   |  |
| rfbD; dTDP-4-dehydrorhamnose reductase               |            |       |        |        |            |       |        |        |              |       |        |        |             |       |        |        |               |       |        |        |                |       |        |        |                         |     |       |       |    |    |    |   |   |   |   |  |
| <b>SGO_1021</b>                                      |            | 5.625 |        |        |            | 5.625 |        |        |              | 5.625 |        |        |             |       |        |        |               |       |        |        |                |       |        |        |                         |     |       |       |    |    |    |   |   |   |   |  |
| rgpA; rhamnosyltransferase, putative                 |            |       |        |        |            |       |        |        |              |       |        |        |             |       |        |        |               |       |        |        |                |       |        |        |                         |     |       |       |    |    |    |   |   |   |   |  |
| <b>SGO_1022</b>                                      |            | 5.593 |        |        |            | 5.593 |        |        |              | 5.593 |        |        |             |       |        |        |               |       |        |        |                |       |        |        |                         |     |       |       |    |    |    |   |   |   |   |  |
| rhamnosyltransferase                                 |            |       |        |        |            |       |        |        |              |       |        |        |             |       |        |        |               |       |        |        |                |       |        |        |                         |     |       |       |    |    |    |   |   |   |   |  |
| <b>SGO_1024</b>                                      | -2.758     | 6.575 | 0.0023 | 0.0063 | -0.897     | 6.994 | 0.0133 | 0.0467 |              | 6.371 |        |        | 1.861       | 5.327 | 0.0044 | 0.0154 |               | 2.528 |        |        |                | 4.969 |        |        |                         |     |       |       |    |    |    |   |   |   |   |  |
| putative polysaccharide ABC transporter              |            |       |        |        |            |       |        |        |              |       |        |        |             |       |        |        |               |       |        |        |                |       |        |        |                         |     |       |       |    |    |    |   |   |   |   |  |
| <b>SGO_1025</b>                                      | -1.071     | 6.306 | 0.0103 | 0.0406 | -0.018     | 6.700 | 0.1714 | 0.9072 | -0.576       | 6.464 | 0.0131 | 0.0922 | 1.052       | 5.779 | 0.0087 | 0.0402 | 0.495         | 4.844 | 0.0527 | 0.3287 | -0.558         | 5.938 | 0.0438 | 0.0934 |                         |     |       |       |    |    |    |   |   |   |   |  |
| rgp; glycosyltransferase                             |            |       |        |        |            |       |        |        |              |       |        |        |             |       |        |        |               |       |        |        |                |       |        |        |                         |     |       |       |    |    |    |   |   |   |   |  |
| <b>SGO_1026</b>                                      | -1.947     | 8.073 | 0.0048 | 0.0151 | -2.178     | 8.025 | 0.0046 | 0.0126 | -3.207       | 7.890 | 0.0021 | 0.0088 | -0.231      | 6.138 | 0.0308 | 0.1900 | -1.260        | 5.145 | 0.0030 | 0.0084 | -1.030         | 5.584 | 0.0017 | 0.0002 |                         |     |       |       |    |    |    |   |   |   |   |  |
| rhamnosyltransferase                                 |            |       |        |        |            |       |        |        |              |       |        |        |             |       |        |        |               |       |        |        |                |       |        |        |                         |     |       |       |    |    |    |   |   |   |   |  |
| <b>SGO_1027</b>                                      |            | 5.739 |        |        |            | 5.739 |        |        |              | 5.739 |        |        |             |       |        |        |               |       |        |        |                |       |        |        |                         |     |       |       |    |    |    |   |   |   |   |  |
| hypothetical protein SGO_1027                        |            |       |        |        |            |       |        |        |              |       |        |        |             |       |        |        |               |       |        |        |                |       |        |        |                         |     |       |       |    |    |    |   |   |   |   |  |
| <b>SGO_1028</b>                                      |            | 4.110 |        |        |            | 4.110 |        |        |              | 4.110 |        |        |             |       |        |        |               |       |        |        |                |       |        |        |                         |     |       |       |    |    |    |   |   |   |   |  |
| hypothetical protein SGO_1028                        |            |       |        |        |            |       |        |        |              |       |        |        |             |       |        |        |               |       |        |        |                |       |        |        |                         |     |       |       |    |    |    |   |   |   |   |  |
| <b>SGO_1030</b>                                      |            | 4.129 |        |        |            | 4.129 |        |        |              | 4.129 |        |        |             |       |        |        |               |       |        |        |                |       |        |        |                         |     |       |       |    |    |    |   |   |   |   |  |
| hypothetical protein SGO_1030                        |            |       |        |        |            |       |        |        |              |       |        |        |             |       |        |        |               |       |        |        |                |       |        |        |                         |     |       |       |    |    |    |   |   |   |   |  |
| <b>SGO_1031</b>                                      | -0.494     | 5.534 | 0.0028 | 0.0079 | -0.051     | 5.735 | 0.1206 | 0.6069 | -0.973       | 5.369 | 0.0025 | 0.0107 | 0.443       | 4.994 | 0.0067 | 0.0276 | -0.479        | 3.944 | 0.0246 | 0.1287 | -0.922         | 4.825 | 0.0158 | 0.0184 |                         |     |       |       |    |    |    |   |   |   |   |  |
| cmk; cytidylate kinase                               |            |       |        |        |            |       |        |        |              |       |        |        |             |       |        |        |               |       |        |        |                |       |        |        |                         |     |       |       |    |    |    |   |   |   |   |  |
| <b>SGO_1032</b>                                      |            | 4.700 |        |        | -0.408     | 5.564 | 0.0853 | 0.4151 | -0.623       | 5.422 | 0.0007 | 0.0018 |             | 3.902 |        |        |               | 2.955 |        |        | -0.215         | 4.744 | 0.1382 | 0.4357 |                         |     |       |       |    |    |    |   |   |   |   |  |
| infC; translation initiation factor IF-3             |            |       |        |        |            |       |        |        |              |       |        |        |             |       |        |        |               |       |        |        |                |       |        |        |                         |     |       |       |    |    |    |   |   |   |   |  |

Show detected proteins only  
 Show all proteins

Proteins found:  
1179

Filter by category:  
ABC Transporter

Dot Plots  
Dot Plots

Test

Cutoff

q-Value

p-Value

.005

| Signif | Direction | Applies To   |
|--------|-----------|--------------|
| yes    | +         | ratios, bars |
| no     | n/a       | bars         |
| yes    | -         | ratios, bars |
| yes    | +         | p-, q-Values |
| yes    | -         | p-, q-Values |

SgFn vs Sg — — SgPg vs Sg  
SgPgFn vs Sg — — SgPg vs SgFn  
SgPgFn vs SgFn — — SgPgFn vs SgPg

Summary Table SgFn vs Sg SgPg vs Sg SgPgFn vs Sg SgPg v SgFn SgPgFn v SgFn SgPgFn vs SgPg Coverage

| Protein                                                                             | SgFn vs Sg    |       |               |               | SgPg vs Sg    |       |               |        | SgPgFn vs Sg  |       |               |        | SgPg v SgFn   |       |               |        | SgPgFn v SgFn |       |               |        | SgPgFn vs SgPg |       |        |        | Log <sub>2</sub> Ratios |     |       |       |    |    |    |   |   |   |   |  |
|-------------------------------------------------------------------------------------|---------------|-------|---------------|---------------|---------------|-------|---------------|--------|---------------|-------|---------------|--------|---------------|-------|---------------|--------|---------------|-------|---------------|--------|----------------|-------|--------|--------|-------------------------|-----|-------|-------|----|----|----|---|---|---|---|--|
|                                                                                     | Ratio         | Sum   | q-Val         | p-Val         | Ratio         | Sum   | q-Val         | p-Val  | Ratio         | Sum   | q-Val         | p-Val  | Ratio         | Sum   | q-Val         | p-Val  | Ratio         | Sum   | q-Val         | p-Val  | Ratio          | Sum   | q-Val  | p-Val  | Ratio                   | Sum | q-Val | p-Val | -6 | -4 | -2 | 0 | 2 | 4 | 6 |  |
| <b>SGO_1033</b><br>rpmI; ribosomal protein L35                                      | -0.590        | 7.556 | 0.0312        | 0.1631        |               | 6.858 |               |        | -0.863        | 7.498 | 0.0208        | 0.1629 |               | 5.660 |               |        | -0.273        | 5.973 | 0.0937        | 0.6504 |                | 5.504 |        |        |                         |     |       |       |    |    |    |   |   |   |   |  |
| <b>SGO_1034</b><br>rpIT; ribosomal protein L20                                      | 0.007         | 9.370 | 0.1242        | 0.8190        | <b>1.019</b>  | 9.964 | <b>0.0000</b> | 0.0000 | 0.317         | 9.575 | 0.0337        | 0.2807 | <b>1.012</b>  | 9.453 | <b>0.0001</b> | 0.0000 | 0.310         | 8.455 | 0.0481        | 0.2893 | -0.702         | 9.592 | 0.0321 | 0.0574 |                         |     |       |       |    |    |    |   |   |   |   |  |
| <b>SGO_1035</b><br>gloA; lactoylglutathione lyase                                   | <b>1.252</b>  | 6.060 | <b>0.0022</b> | 0.0058        | 0.688         | 5.690 | 0.0127        | 0.0439 | 0.599         | 5.642 | 0.0130        | 0.0914 | <b>-0.564</b> | 5.768 | <b>0.0013</b> | 0.0027 | <b>-0.653</b> | 5.126 | <b>0.0027</b> | 0.0070 | -0.089         | 5.418 | 0.1403 | 0.4457 |                         |     |       |       |    |    |    |   |   |   |   |  |
| <b>SGO_1036</b><br>amino acid ABC transporter, ATP-binding protein SP1242           | -0.270        | 7.310 | 0.0668        | 0.4036        | -1.212        | 6.966 | 0.0083        | 0.0259 | <b>-2.329</b> | 6.684 | <b>0.0011</b> | 0.0035 | -0.942        | 6.292 | 0.0161        | 0.0871 | <b>-2.060</b> | 5.362 | <b>0.0045</b> | 0.0142 | -1.118         | 5.294 | 0.0358 | 0.0685 |                         |     |       |       |    |    |    |   |   |   |   |  |
| <b>SGO_1037</b><br>glutamine ABC transporter permease and substrate binding protein | <b>-2.158</b> | 5.957 | <b>0.0010</b> | <b>0.0019</b> | <b>-0.955</b> | 6.229 | <b>0.0002</b> | 0.0001 |               | 5.628 |               |        | 1.204         | 4.743 | 0.0083        | 0.0375 |               | 2.538 |               |        |                | 4.162 |        |        |                         |     |       |       |    |    |    |   |   |   |   |  |
| <b>SGO_1038</b><br>uvrB; excinuclease ABC, B subunit                                | 1.093         | 5.266 | 0.0097        | 0.0377        | 0.889         | 5.145 | 0.0229        | 0.0908 | 0.907         | 5.145 | 0.0101        | 0.0649 | -0.205        | 5.088 | 0.0722        | 0.5173 | -0.187        | 4.477 | 0.0694        | 0.4605 | 0.018          | 4.993 | 0.2552 | 0.9977 |                         |     |       |       |    |    |    |   |   |   |   |  |
| <b>SGO_1039</b><br>hypothetical protein SGO_1039                                    |               | 3.272 |               |               |               | 3.272 |               |        |               | 3.272 |               |        |               |       |               |        |               |       |               |        |                |       |        |        |                         |     |       |       |    |    |    |   |   |   |   |  |
| <b>SGO_1041</b><br>hypothetical protein SGO_1041                                    | 1.365         | 4.298 |               |               | 0.719         | 4.572 | 0.0490        | 0.2172 |               | 2.459 |               |        | -0.646        | 4.507 | 0.0268        | 0.1605 |               | 2.700 |               |        |                | 3.680 |        |        |                         |     |       |       |    |    |    |   |   |   |   |  |
| <b>SGO_1044</b><br>MutT/nudix family protein                                        | 2.231         | 3.094 |               |               | 2.045         | 3.796 | 0.0095        | 0.0310 |               | 0.585 |               |        | -0.186        | 3.767 | 0.0278        | 0.1681 |               | 1.692 |               |        |                | 3.118 |        |        |                         |     |       |       |    |    |    |   |   |   |   |  |
| <b>SGO_1047</b><br>hypothetical protein SGO_1047                                    | -2.388        | 5.361 | 0.0294        | 0.1515        | 0.514         | 6.503 | 0.0197        | 0.0765 | -0.691        | 5.932 | 0.0115        | 0.0768 | 2.902         | 5.310 | 0.0170        | 0.0942 | 1.697         | 3.631 | 0.0356        | 0.2046 | -1.205         | 5.745 | 0.0107 | 0.0100 |                         |     |       |       |    |    |    |   |   |   |   |  |
| <b>SGO_1049</b><br>tRNA pseudouridine synthase B                                    |               | 3.011 |               |               | <b>2.154</b>  | 5.188 | <b>0.0027</b> | 0.0065 | 1.047         | 3.872 | 0.0552        | 0.4899 |               | 4.315 |               |        |               | 1.594 |               |        | -1.108         | 4.615 | 0.0348 | 0.0652 |                         |     |       |       |    |    |    |   |   |   |   |  |
| <b>SGO_1050</b><br>ribF; riboflavin biosynthesis protein RibF                       | 1.494         | 3.254 |               |               | 1.530         | 4.146 | 0.0605        | 0.2783 | 1.263         | 3.088 |               |        | 0.036         | 3.963 | 0.1129        | 0.8522 | -0.230        | 2.581 |               |        | -0.267         | 3.894 | 0.1782 | 0.6234 |                         |     |       |       |    |    |    |   |   |   |   |  |
| <b>SGO_1051</b><br>negative regulator of proteolysis                                |               |       |               |               |               | 3.576 |               |        |               | 1.981 |               |        |               | 3.063 |               |        |               | 0.857 |               |        | -1.595         | 3.476 |        |        |                         |     |       |       |    |    |    |   |   |   |   |  |
| <b>SGO_1054</b><br>NOL1/NOP2/sun family protein                                     |               | 3.033 |               |               | 0.144         | 3.662 | 0.1254        | 0.6353 |               | 3.033 |               |        |               | 1.648 |               |        |               |       |               |        |                | 1.648 |        |        |                         |     |       |       |    |    |    |   |   |   |   |  |
| <b>SGO_1055</b><br>phosphate ABC transporter, phosphate-binding protein             |               | 6.557 |               |               | <b>-1.995</b> | 6.887 | <b>0.0009</b> | 0.0014 |               | 6.557 |               |        |               | 4.083 |               |        |               |       |               |        |                | 4.083 |        |        |                         |     |       |       |    |    |    |   |   |   |   |  |
| <b>SGO_1057</b><br>pstA; phosphate ABC transporter, permease protein PstA           |               | 2.585 |               |               |               | 2.585 |               |        |               | 2.585 |               |        |               |       |               |        |               |       |               |        |                |       |        |        |                         |     |       |       |    |    |    |   |   |   |   |  |

Show detected proteins only  
 Show all proteins

Proteins found:  
1179

Filter by category:  
ABC Transporter

Dot Plots  
Dot Plots

Test

Cutoff

q-Value

p-Value

.005

| Signif | Direction | Applies To   |
|--------|-----------|--------------|
| yes    | +         | ratios, bars |
| no     | n/a       | bars         |
| yes    | -         | ratios, bars |
| yes    | +         | p-, q-Values |
| yes    | -         | p-, q-Values |

SgFn vs Sg —  
SgPgFn vs Sg —  
SgPgFn vs SgFn —  
SgPg vs Sg —  
SgPg vs SgFn —  
SgPgFn vs SgPg —

Summary Table SgFn vs Sg SgPg vs Sg SgPgFn vs Sg SgPg v SgFn SgPgFn v SgFn SgPgFn vs SgPg Coverage

| Protein                                                                                                           | SgFn vs Sg |        |        |        | SgPg vs Sg |        |        |        | SgPgFn vs Sg |        |        |        | SgPg v SgFn |        |        |        | SgPgFn v SgFn |        |        |        | SgPgFn vs SgPg |        |        |        | Log <sub>2</sub> Ratios |     |       |       |    |    |    |   |   |   |   |  |  |  |  |  |  |  |  |
|-------------------------------------------------------------------------------------------------------------------|------------|--------|--------|--------|------------|--------|--------|--------|--------------|--------|--------|--------|-------------|--------|--------|--------|---------------|--------|--------|--------|----------------|--------|--------|--------|-------------------------|-----|-------|-------|----|----|----|---|---|---|---|--|--|--|--|--|--|--|--|
|                                                                                                                   | Ratio      | Sum    | q-Val  | p-Val  | Ratio      | Sum    | q-Val  | p-Val  | Ratio        | Sum    | q-Val  | p-Val  | Ratio       | Sum    | q-Val  | p-Val  | Ratio         | Sum    | q-Val  | p-Val  | Ratio          | Sum    | q-Val  | p-Val  | Ratio                   | Sum | q-Val | p-Val | -6 | -4 | -2 | 0 | 2 | 4 | 6 |  |  |  |  |  |  |  |  |
| <b>SGO_1058</b>                                                                                                   |            | 6.104  |        |        | -1.604     | 6.514  | 0.0002 | 0.0001 | -0.384       | 6.571  | 0.0169 | 0.1253 |             | 3.985  |        |        |               | 3.594  |        |        | 1.220          | 5.099  | 0.0073 | 0.0050 |                         |     |       |       |    |    |    |   |   |   |   |  |  |  |  |  |  |  |  |
| pstB; Phosphate import ATP-binding protein pstB 2 (Phosphate-transporting ATPase 2) (ABC phosphate transporter 2) |            |        |        |        |            |        |        |        |              |        |        |        |             |        |        |        |               |        |        |        |                |        |        |        |                         |     |       |       |    |    |    |   |   |   |   |  |  |  |  |  |  |  |  |
| <b>SGO_1059</b>                                                                                                   | -1.598     | 5.982  | 0.0001 | 0.0001 | 0.545      | 6.866  | 0.0004 | 0.0004 | 0.849        | 7.054  | 0.0001 | 0.0000 | 2.143       | 5.896  | 0.0001 | 0.0001 | 2.447         | 5.537  | 0.0001 | 0.0000 | 0.304          | 6.760  | 0.0048 | 0.0016 |                         |     |       |       |    |    |    |   |   |   |   |  |  |  |  |  |  |  |  |
| pstB; Phosphate import ATP-binding protein pstB 1 (Phosphate-transporting ATPase 1) (ABC phosphate transporter 1) |            |        |        |        |            |        |        |        |              |        |        |        |             |        |        |        |               |        |        |        |                |        |        |        |                         |     |       |       |    |    |    |   |   |   |   |  |  |  |  |  |  |  |  |
| <b>SGO_1060</b>                                                                                                   | -1.641     | 7.306  | 0.0009 | 0.0016 | -0.234     | 7.789  | 0.0257 | 0.1035 | -1.276       | 7.399  | 0.0007 | 0.0018 | 1.407       | 6.618  | 0.0009 | 0.0014 | 0.365         | 5.333  | 0.0135 | 0.0606 | -1.042         | 6.723  | 0.0043 | 0.0012 |                         |     |       |       |    |    |    |   |   |   |   |  |  |  |  |  |  |  |  |
| phosphate transport system regulatory protein                                                                     |            |        |        |        |            |        |        |        |              |        |        |        |             |        |        |        |               |        |        |        |                |        |        |        |                         |     |       |       |    |    |    |   |   |   |   |  |  |  |  |  |  |  |  |
| <b>SGO_1065</b>                                                                                                   | -0.762     | 6.548  | 0.0014 | 0.0031 | -0.937     | 6.481  | 0.0002 | 0.0001 | -0.993       | 6.465  | 0.0004 | 0.0009 | -0.175      | 5.520  | 0.0316 | 0.1956 | -0.231        | 4.888  | 0.0351 | 0.1995 | -0.056         | 5.401  | 0.1849 | 0.6538 |                         |     |       |       |    |    |    |   |   |   |   |  |  |  |  |  |  |  |  |
| hypothetical protein SGO_1065                                                                                     |            |        |        |        |            |        |        |        |              |        |        |        |             |        |        |        |               |        |        |        |                |        |        |        |                         |     |       |       |    |    |    |   |   |   |   |  |  |  |  |  |  |  |  |
| <b>SGO_1066</b>                                                                                                   | -0.160     | 6.695  | 0.0523 | 0.2992 | -1.426     | 6.237  | 0.0027 | 0.0065 |              | 5.779  |        |        | -1.266      | 5.599  | 0.0009 | 0.0016 |               | 4.482  |        |        |                | 3.844  |        |        |                         |     |       |       |    |    |    |   |   |   |   |  |  |  |  |  |  |  |  |
| hypothetical protein SGO_1066                                                                                     |            |        |        |        |            |        |        |        |              |        |        |        |             |        |        |        |               |        |        |        |                |        |        |        |                         |     |       |       |    |    |    |   |   |   |   |  |  |  |  |  |  |  |  |
| <b>SGO_1067</b>                                                                                                   | 0.317      | 2.974  |        |        |            | 1.807  |        |        |              | 1.807  |        |        |             | 1.611  |        |        |               | 1.000  |        |        |                |        |        |        |                         |     |       |       |    |    |    |   |   |   |   |  |  |  |  |  |  |  |  |
| hypothetical protein SGO_1067                                                                                     |            |        |        |        |            |        |        |        |              |        |        |        |             |        |        |        |               |        |        |        |                |        |        |        |                         |     |       |       |    |    |    |   |   |   |   |  |  |  |  |  |  |  |  |
| <b>SGO_1069</b>                                                                                                   | 0.425      | 8.560  | 0.0023 | 0.0062 | 0.674      | 8.712  | 0.0038 | 0.0100 | 0.331        | 8.508  | 0.0047 | 0.0248 | 0.250       | 8.375  | 0.0127 | 0.0644 | -0.094        | 7.585  | 0.0233 | 0.1204 | -0.344         | 8.334  | 0.0248 | 0.0395 |                         |     |       |       |    |    |    |   |   |   |   |  |  |  |  |  |  |  |  |
| membrane alanyl aminopeptidase                                                                                    |            |        |        |        |            |        |        |        |              |        |        |        |             |        |        |        |               |        |        |        |                |        |        |        |                         |     |       |       |    |    |    |   |   |   |   |  |  |  |  |  |  |  |  |
| <b>SGO_1072</b>                                                                                                   | 3.899      | 6.269  | 0.0019 | 0.0046 | 1.254      | 3.081  |        |        |              | 1.322  |        |        | -2.645      | 5.819  | 0.0021 | 0.0051 |               | 5.097  |        |        |                | 2.063  |        |        |                         |     |       |       |    |    |    |   |   |   |   |  |  |  |  |  |  |  |  |
| ciaR; Transcriptional regulatory protein CiaR                                                                     |            |        |        |        |            |        |        |        |              |        |        |        |             |        |        |        |               |        |        |        |                |        |        |        |                         |     |       |       |    |    |    |   |   |   |   |  |  |  |  |  |  |  |  |
| <b>SGO_1073</b>                                                                                                   | -0.816     | 5.409  | 0.0184 | 0.0834 | -2.149     | 5.203  | 0.0133 | 0.0468 |              | 5.049  |        |        | -1.332      | 3.200  |        |        |               | 2.107  |        |        |                | 1.385  |        |        |                         |     |       |       |    |    |    |   |   |   |   |  |  |  |  |  |  |  |  |
| Sensor protein CiaH                                                                                               |            |        |        |        |            |        |        |        |              |        |        |        |             |        |        |        |               |        |        |        |                |        |        |        |                         |     |       |       |    |    |    |   |   |   |   |  |  |  |  |  |  |  |  |
| <b>SGO_1075</b>                                                                                                   | 2.151      | 5.320  | 0.0250 | 0.1226 | 0.098      | 3.050  |        |        |              | 2.000  |        |        | -2.053      | 4.817  | 0.0216 | 0.1250 |               | 4.044  |        |        |                | 1.585  |        |        |                         |     |       |       |    |    |    |   |   |   |   |  |  |  |  |  |  |  |  |
| alpha-amylase precursor                                                                                           |            |        |        |        |            |        |        |        |              |        |        |        |             |        |        |        |               |        |        |        |                |        |        |        |                         |     |       |       |    |    |    |   |   |   |   |  |  |  |  |  |  |  |  |
| <b>SGO_1077</b>                                                                                                   | -0.574     | 5.673  | 0.1462 | 0.9937 | -0.543     | 5.427  | 0.0040 | 0.0106 |              | 4.671  |        |        | 0.031       | 4.917  | 0.0724 | 0.5199 |               | 3.552  |        |        |                | 3.620  |        |        |                         |     |       |       |    |    |    |   |   |   |   |  |  |  |  |  |  |  |  |
| coaA; pantothenate kinase                                                                                         |            |        |        |        |            |        |        |        |              |        |        |        |             |        |        |        |               |        |        |        |                |        |        |        |                         |     |       |       |    |    |    |   |   |   |   |  |  |  |  |  |  |  |  |
| <b>SGO_1078</b>                                                                                                   |            | 5.392  |        |        |            | 4.180  |        |        |              |        |        |        | -1.252      | 5.397  | 0.0030 | 0.0090 |               | 4.268  |        |        |                | 3.667  |        |        |                         |     |       |       |    |    |    |   |   |   |   |  |  |  |  |  |  |  |  |
| methyltransferase domain protein                                                                                  |            |        |        |        |            |        |        |        |              |        |        |        |             |        |        |        |               |        |        |        |                |        |        |        |                         |     |       |       |    |    |    |   |   |   |   |  |  |  |  |  |  |  |  |
| <b>SGO_1079</b>                                                                                                   | 0.866      | 7.696  | 0.0238 | 0.1139 | -0.010     | 7.139  | 0.1705 | 0.8989 | -0.826       | 6.789  | 0.0056 | 0.0302 | -0.876      | 7.174  | 0.0185 | 0.1042 | -1.692        | 6.333  | 0.0101 | 0.0421 | -0.816         | 6.258  | 0.0107 | 0.0101 |                         |     |       |       |    |    |    |   |   |   |   |  |  |  |  |  |  |  |  |
| pdp; pyrimidine-nucleoside phosphorylase                                                                          |            |        |        |        |            |        |        |        |              |        |        |        |             |        |        |        |               |        |        |        |                |        |        |        |                         |     |       |       |    |    |    |   |   |   |   |  |  |  |  |  |  |  |  |
| <b>SGO_1080</b>                                                                                                   | -0.018     | 8.282  | 0.1194 | 0.7822 | 0.227      | 8.409  | 0.0119 | 0.0406 | -0.127       | 8.229  | 0.0176 | 0.1329 | 0.245       | 7.887  | 0.0045 | 0.0165 | -0.109        | 7.094  | 0.0180 | 0.0847 | -0.354         | 7.838  | 0.0064 | 0.0039 |                         |     |       |       |    |    |    |   |   |   |   |  |  |  |  |  |  |  |  |
| deoC; deoxyribose-phosphate aldolase                                                                              |            |        |        |        |            |        |        |        |              |        |        |        |             |        |        |        |               |        |        |        |                |        |        |        |                         |     |       |       |    |    |    |   |   |   |   |  |  |  |  |  |  |  |  |
| <b>SGO_1081</b>                                                                                                   |            | 3.660  |        |        | -0.569     | 4.373  | 0.0588 | 0.2694 | 0.464        | 4.360  | 0.0716 | 0.6617 |             | 2.500  |        |        |               | 1.857  |        |        |                | 1.033  | 3.484  | 0.0735 | 0.1892                  |     |       |       |    |    |    |   |   |   |   |  |  |  |  |  |  |  |  |
| cdd; cytidine deaminase                                                                                           |            |        |        |        |            |        |        |        |              |        |        |        |             |        |        |        |               |        |        |        |                |        |        |        |                         |     |       |       |    |    |    |   |   |   |   |  |  |  |  |  |  |  |  |
| <b>SGO_1082</b>                                                                                                   | -1.703     | 12.818 | 0.0002 | 0.0001 | -0.805     | 13.082 | 0.0002 | 0.0001 | -1.016       | 13.028 | 0.0024 | 0.0103 | 0.898       | 11.735 | 0.0011 | 0.0019 | 0.686         | 11.027 | 0.0202 | 0.0984 | -0.212         | 12.037 | 0.1609 | 0.5401 |                         |     |       |       |    |    |    |   |   |   |   |  |  |  |  |  |  |  |  |
| lipoprotein                                                                                                       |            |        |        |        |            |        |        |        |              |        |        |        |             |        |        |        |               |        |        |        |                |        |        |        |                         |     |       |       |    |    |    |   |   |   |   |  |  |  |  |  |  |  |  |

Show detected proteins only  
 Show all proteins

Proteins found:  
1179

Dot Plots  
Dot Plots

Test

Cutoff

q-Value

p-Value

.005

| Signif | Direction | Applies To   |
|--------|-----------|--------------|
| yes    | +         | ratios, bars |
| no     | n/a       | bars         |
| yes    | -         | ratios, bars |
| yes    | +         | p-, q-Values |
| yes    | -         | p-, q-Values |

SgFn vs Sg —  
SgPgFn vs Sg —  
SgPgFn vs SgFn —  
SgPg vs SgPg —  
SgPg vs SgFn —  
SgPgFn vs SgPg —

Summary Table SgFn vs Sg SgPg vs Sg SgPgFn vs Sg SgPg v SgFn SgPgFn v SgFn SgPgFn vs SgPg Coverage

| Protein                                                                   | SgFn vs Sg |        |        |        | SgPg vs Sg |        |        |        | SgPgFn vs Sg |       |        |        | SgPg v SgFn |        |        |        | SgPgFn v SgFn |        |        |        | SgPgFn vs SgPg |        |        |        | Log <sub>2</sub> Ratios |     |       |       |    |    |    |   |   |   |   |  |
|---------------------------------------------------------------------------|------------|--------|--------|--------|------------|--------|--------|--------|--------------|-------|--------|--------|-------------|--------|--------|--------|---------------|--------|--------|--------|----------------|--------|--------|--------|-------------------------|-----|-------|-------|----|----|----|---|---|---|---|--|
|                                                                           | Ratio      | Sum    | q-Val  | p-Val  | Ratio      | Sum    | q-Val  | p-Val  | Ratio        | Sum   | q-Val  | p-Val  | Ratio       | Sum    | q-Val  | p-Val  | Ratio         | Sum    | q-Val  | p-Val  | Ratio          | Sum    | q-Val  | p-Val  | Ratio                   | Sum | q-Val | p-Val | -6 | -4 | -2 | 0 | 2 | 4 | 6 |  |
| <b>SGO_1083</b><br>sugar ABC transporter, ATP-binding protein SP0846      |            | 7.517  |        |        |            | 8.625  |        |        |              | 7.979 |        |        | 1.096       | 8.662  | 0.0021 | 0.0055 | 0.463         | 7.643  | 0.0001 | 0.0000 | -0.634         | 8.825  | 0.0148 | 0.0168 |                         |     |       |       |    |    |    |   |   |   |   |  |
| <b>SGO_1088</b><br>transcription regulator, LysR family                   |            | 2.718  |        |        | 0.884      | 4.195  | 0.0275 | 0.1112 | 0.367        | 3.396 | 0.0737 | 0.6830 |             | 3.040  |        |        |               | 0.857  |        |        | -0.517         | 3.458  | 0.1390 | 0.4396 |                         |     |       |       |    |    |    |   |   |   |   |  |
| <b>SGO_1090</b><br>pseudouridine synthase, RluA family                    | -0.494     | 5.182  | 0.0601 | 0.3543 | -0.245     | 5.633  | 0.0727 | 0.3447 |              | 4.751 |        |        | 0.249       | 4.491  | 0.0722 | 0.5174 |               | 2.107  |        |        |                | 3.991  |        |        |                         |     |       |       |    |    |    |   |   |   |   |  |
| <b>SGO_1091</b><br>hypothetical protein SGO_1091                          |            | 2.022  |        |        |            | 2.022  |        |        |              | 2.022 |        |        |             |        |        |        |               |        |        |        |                |        |        |        |                         |     |       |       |    |    |    |   |   |   |   |  |
| <b>SGO_1096</b><br>butA; acetoin dehydrogenase                            | 6.559      | 13.354 | 0.0001 | 0.0000 | 3.057      | 10.001 | 0.0001 | 0.0000 | 2.511        | 9.539 | 0.0010 | 0.0031 | -3.502      | 12.948 | 0.0001 | 0.0001 | -4.048        | 12.301 | 0.0002 | 0.0001 | -0.546         | 10.083 | 0.0167 | 0.0208 |                         |     |       |       |    |    |    |   |   |   |   |  |
| <b>SGO_1097</b><br>proB; glutamate 5-kinase                               | 2.446      | 3.689  |        |        |            | 1.000  |        |        |              | 1.000 |        |        |             | 2.933  |        |        |               | 2.322  |        |        |                |        |        |        |                         |     |       |       |    |    |    |   |   |   |   |  |
| <b>SGO_1098</b><br>proA; gamma-glutamyl phosphate reductase               | 3.518      | 6.387  | 0.0016 | 0.0037 | 2.384      | 5.365  | 0.0434 | 0.1888 | 1.476        | 4.525 | 0.0115 | 0.0771 | -1.135      | 6.369  | 0.0019 | 0.0043 | -2.043        | 5.516  | 0.0001 | 0.0000 | -0.908         | 5.326  | 0.0271 | 0.0453 |                         |     |       |       |    |    |    |   |   |   |   |  |
| <b>SGO_1099</b><br>proC; pyrroline-5-carboxylate reductase                | 2.177      | 5.178  | 0.0740 | 0.4560 |            | 1.322  |        |        |              | 1.322 |        |        |             | 4.561  |        |        |               | 3.950  |        |        |                |        |        |        |                         |     |       |       |    |    |    |   |   |   |   |  |
| <b>SGO_1100</b><br>phnA; alkylphosphonate utilization operon protein PhnA |            | 3.807  |        |        |            | 3.807  |        |        |              | 3.807 |        |        |             |        |        |        |               |        |        |        |                |        |        |        |                         |     |       |       |    |    |    |   |   |   |   |  |
| <b>SGO_1103</b><br>carA; carbamoyl-phosphate synthase, small subunit      |            | 3.944  |        |        |            | 3.944  |        |        |              | 3.944 |        |        |             |        |        |        |               |        |        |        |                |        |        |        |                         |     |       |       |    |    |    |   |   |   |   |  |
| <b>SGO_1104</b><br>carB; carbamoyl-phosphate synthase, large subunit      | -0.461     | 4.724  | 0.0114 | 0.0463 |            | 4.277  |        |        | 0.289        | 4.965 | 0.0092 | 0.0571 |             | 2.302  |        |        | 0.750         | 3.115  |        |        |                | 3.053  |        |        |                         |     |       |       |    |    |    |   |   |   |   |  |
| <b>SGO_1107</b><br>PyrR bifunctional protein                              | -1.932     | 4.963  | 0.0370 | 0.1991 | -0.775     | 5.151  | 0.0690 | 0.3237 | -1.162       | 5.074 | 0.0311 | 0.2563 | 1.157       | 2.994  |        |        | 0.770         | 2.127  |        |        | -0.387         | 3.279  |        |        |                         |     |       |       |    |    |    |   |   |   |   |  |
| <b>SGO_1109</b><br>pyrB; aspartate carbamoyltransferase                   | -1.562     | 7.655  | 0.0005 | 0.0008 | -0.059     | 8.205  | 0.0928 | 0.4547 | -0.527       | 7.996 | 0.0029 | 0.0129 | 1.503       | 7.095  | 0.0001 | 0.0000 | 1.035         | 6.157  | 0.0011 | 0.0017 | -0.468         | 7.446  | 0.0077 | 0.0055 |                         |     |       |       |    |    |    |   |   |   |   |  |
| <b>SGO_1110</b><br>surface antigen SCP-like domain                        | -2.330     | 6.283  | 0.0068 | 0.0242 |            | 6.147  |        |        |              | 6.147 |        |        |             | 2.302  |        |        |               | 1.692  |        |        |                |        |        |        |                         |     |       |       |    |    |    |   |   |   |   |  |
| <b>SGO_1111</b><br>fruR; phosphotransferase system repressor              | -2.986     | 6.930  | 0.0008 | 0.0012 | -2.353     | 7.016  | 0.0010 | 0.0016 | -3.352       | 6.828 | 0.0127 | 0.0882 | 0.633       | 4.603  | 0.0021 | 0.0054 | -0.366        | 3.112  | 0.0209 | 0.1038 | -0.999         | 4.208  | 0.0466 | 0.1029 |                         |     |       |       |    |    |    |   |   |   |   |  |
| <b>SGO_1112</b><br>fruB; 1-phosphofructokinase                            | -2.373     | 7.196  | 0.0001 | 0.0000 | -1.735     | 7.327  | 0.0004 | 0.0004 | -3.355       | 7.010 | 0.0028 | 0.0123 | 0.638       | 5.431  | 0.0121 | 0.0598 | -0.983        | 3.774  | 0.0214 | 0.1074 | -1.620         | 4.938  | 0.0735 | 0.1901 |                         |     |       |       |    |    |    |   |   |   |   |  |

Show detected proteins only  
 Show all proteins

Proteins found:  
1179

Dot Plots  
Dot Plots

Test

Cutoff

q-Value

p-Value

.005

| Signif | Direction | Applies To   |
|--------|-----------|--------------|
| yes    | +         | ratios, bars |
| no     | n/a       | bars         |
| yes    | -         | ratios, bars |
| yes    | +         | p-, q-Values |
| yes    | -         |              |

SgFn vs Sg —  
SgPgFn vs Sg —  
SgPgFn vs SgFn —  
SgPg vs Sg —  
SgPg vs SgFn —  
SgPgFn vs SgPg —

Summary Table SgFn vs Sg SgPg vs Sg SgPgFn vs Sg SgPg v SgFn SgPgFn v SgFn SgPgFn vs SgPg Coverage

| Protein                                                    | SgFn vs Sg |        |        |        | SgPg vs Sg |        |        |        | SgPgFn vs Sg |        |        |        | SgPg v SgFn |       |        |        | SgPgFn v SgFn |       |        |        | SgPgFn vs SgPg |       |        |        | Log <sub>2</sub> Ratios |     |       |       |    |    |    |   |   |   |   |  |
|------------------------------------------------------------|------------|--------|--------|--------|------------|--------|--------|--------|--------------|--------|--------|--------|-------------|-------|--------|--------|---------------|-------|--------|--------|----------------|-------|--------|--------|-------------------------|-----|-------|-------|----|----|----|---|---|---|---|--|
|                                                            | Ratio      | Sum    | q-Val  | p-Val  | Ratio      | Sum    | q-Val  | p-Val  | Ratio        | Sum    | q-Val  | p-Val  | Ratio       | Sum   | q-Val  | p-Val  | Ratio         | Sum   | q-Val  | p-Val  | Ratio          | Sum   | q-Val  | p-Val  | Ratio                   | Sum | q-Val | p-Val | -6 | -4 | -2 | 0 | 2 | 4 | 6 |  |
| <b>SGO_1113</b>                                            | -4.663     | 11.177 | 0.0000 | 0.0000 | -3.955     | 11.208 | 0.0000 | 0.0000 | -3.884       | 11.211 | 0.0000 | 0.0000 | 0.709       | 7.396 | 0.0246 | 0.1456 | 0.779         | 6.817 | 0.0182 | 0.0864 | 0.070          | 7.700 | 0.2139 | 0.7865 |                         |     |       |       |    |    |    |   |   |   |   |  |
| fruA; PTS system, fructose specific IIABC components       |            |        |        |        |            |        |        |        |              |        |        |        |             |       |        |        |               |       |        |        |                |       |        |        |                         |     |       |       |    |    |    |   |   |   |   |  |
| <b>SGO_1114</b>                                            | -2.537     | 6.777  | 0.0003 | 0.0002 | -1.137     | 7.080  | 0.0005 | 0.0005 | -2.238       | 6.815  | 0.0001 | 0.0001 | 1.400       | 5.373 | 0.0022 | 0.0060 | 0.299         | 4.065 | 0.0612 | 0.3976 | -1.101         | 5.443 | 0.0051 | 0.0023 |                         |     |       |       |    |    |    |   |   |   |   |  |
| Protein of unknown function (DUF1149) superfamily          |            |        |        |        |            |        |        |        |              |        |        |        |             |       |        |        |               |       |        |        |                |       |        |        |                         |     |       |       |    |    |    |   |   |   |   |  |
| <b>SGO_1115</b>                                            | 2.947      | 4.930  |        |        | 1.302      | 4.389  | 0.0357 | 0.1516 |              | 1.807  |        |        | -1.645      | 4.960 | 0.0095 | 0.0441 |               | 3.630 |        |        |                | 3.612 |        |        |                         |     |       |       |    |    |    |   |   |   |   |  |
| DegV family protein                                        |            |        |        |        |            |        |        |        |              |        |        |        |             |       |        |        |               |       |        |        |                |       |        |        |                         |     |       |       |    |    |    |   |   |   |   |  |
| <b>SGO_1116</b>                                            | 2.419      | 6.592  | 0.0002 | 0.0001 | 2.860      | 6.972  | 0.0002 | 0.0001 | 2.399        | 6.582  | 0.0006 | 0.0013 | 0.440       | 7.068 | 0.0022 | 0.0059 | -0.021        | 6.214 | 0.1274 | 0.9159 | -0.461         | 7.063 | 0.0163 | 0.0196 |                         |     |       |       |    |    |    |   |   |   |   |  |
| dapB; dihydrodipicolinate reductase                        |            |        |        |        |            |        |        |        |              |        |        |        |             |       |        |        |               |       |        |        |                |       |        |        |                         |     |       |       |    |    |    |   |   |   |   |  |
| <b>SGO_1117</b>                                            |            | 4.237  |        |        |            | 3.130  |        |        |              |        |        |        | -0.898      | 4.274 | 0.0269 | 0.1619 |               | 3.113 |        |        |                | 2.617 |        |        |                         |     |       |       |    |    |    |   |   |   |   |  |
| pcnA; polynucleotide adenylyltransferase                   |            |        |        |        |            |        |        |        |              |        |        |        |             |       |        |        |               |       |        |        |                |       |        |        |                         |     |       |       |    |    |    |   |   |   |   |  |
| <b>SGO_1118</b>                                            | 1.378      | 4.957  | 0.0183 | 0.0825 | -0.081     | 3.858  | 0.1344 | 0.6881 |              | 2.322  |        |        | -1.459      | 4.639 | 0.0008 | 0.0011 |               | 3.580 |        |        |                | 2.735 |        |        |                         |     |       |       |    |    |    |   |   |   |   |  |
| ABC transporter, ATP-binding protein SP1553                |            |        |        |        |            |        |        |        |              |        |        |        |             |       |        |        |               |       |        |        |                |       |        |        |                         |     |       |       |    |    |    |   |   |   |   |  |
| <b>SGO_1119</b>                                            |            | 2.036  |        |        |            | 2.036  |        |        |              | 2.036  |        |        |             |       |        |        |               |       |        |        |                |       |        |        |                         |     |       |       |    |    |    |   |   |   |   |  |
| Abi-alpha protein, putative                                |            |        |        |        |            |        |        |        |              |        |        |        |             |       |        |        |               |       |        |        |                |       |        |        |                         |     |       |       |    |    |    |   |   |   |   |  |
| <b>SGO_1120</b>                                            | 1.559      | 8.789  | 0.0013 | 0.0025 | 1.050      | 8.420  | 0.0004 | 0.0005 | 0.698        | 8.203  | 0.0049 | 0.0263 | -0.509      | 8.618 | 0.0052 | 0.0203 | -0.861        | 7.879 | 0.0041 | 0.0122 | -0.352         | 8.177 | 0.0319 | 0.0570 |                         |     |       |       |    |    |    |   |   |   |   |  |
| guaA; GMP synthase                                         |            |        |        |        |            |        |        |        |              |        |        |        |             |       |        |        |               |       |        |        |                |       |        |        |                         |     |       |       |    |    |    |   |   |   |   |  |
| <b>SGO_1121</b>                                            |            | 2.807  |        |        | -0.972     | 3.402  |        |        |              | 2.807  |        |        |             | 1.322 |        |        |               |       |        |        |                | 1.322 |        |        |                         |     |       |       |    |    |    |   |   |   |   |  |
| transcription regulator, GntR family                       |            |        |        |        |            |        |        |        |              |        |        |        |             |       |        |        |               |       |        |        |                |       |        |        |                         |     |       |       |    |    |    |   |   |   |   |  |
| <b>SGO_1123</b>                                            | 0.954      | 7.773  | 0.0005 | 0.0007 | 1.244      | 7.970  | 0.0002 | 0.0001 | 1.001        | 7.805  | 0.0004 | 0.0010 | 0.290       | 7.812 | 0.0038 | 0.0129 | 0.048         | 7.074 | 0.0814 | 0.5514 | -0.243         | 7.834 | 0.0198 | 0.0276 |                         |     |       |       |    |    |    |   |   |   |   |  |
| ffh; signal recognition particle protein                   |            |        |        |        |            |        |        |        |              |        |        |        |             |       |        |        |               |       |        |        |                |       |        |        |                         |     |       |       |    |    |    |   |   |   |   |  |
| <b>SGO_1124</b>                                            |            | 3.025  |        |        |            | 3.025  |        |        |              | 3.025  |        |        |             |       |        |        |               |       |        |        |                |       |        |        |                         |     |       |       |    |    |    |   |   |   |   |  |
| cell surface hydrolase                                     |            |        |        |        |            |        |        |        |              |        |        |        |             |       |        |        |               |       |        |        |                |       |        |        |                         |     |       |       |    |    |    |   |   |   |   |  |
| <b>SGO_1128</b>                                            |            | 2.000  |        |        |            | 2.000  |        |        |              | 2.000  |        |        |             |       |        |        |               |       |        |        |                |       |        |        |                         |     |       |       |    |    |    |   |   |   |   |  |
| bacteriocin-associated integral membrane protein subfamily |            |        |        |        |            |        |        |        |              |        |        |        |             |       |        |        |               |       |        |        |                |       |        |        |                         |     |       |       |    |    |    |   |   |   |   |  |
| <b>SGO_1129</b>                                            | -0.262     | 6.672  | 0.0032 | 0.0095 | -0.806     | 6.457  | 0.0025 | 0.0058 | -0.672       | 6.501  | 0.0006 | 0.0016 | -0.544      | 5.782 | 0.0047 | 0.0173 | -0.410        | 5.221 | 0.0013 | 0.0022 | 0.133          | 5.556 | 0.1407 | 0.4477 |                         |     |       |       |    |    |    |   |   |   |   |  |
| lplA; lipoate protein ligase A                             |            |        |        |        |            |        |        |        |              |        |        |        |             |       |        |        |               |       |        |        |                |       |        |        |                         |     |       |       |    |    |    |   |   |   |   |  |
| <b>SGO_1130</b>                                            | -3.046     | 7.970  | 0.0000 | 0.0000 | -0.666     | 8.509  | 0.0002 | 0.0001 | -0.959       | 8.402  | 0.0001 | 0.0000 | 2.380       | 6.880 | 0.0001 | 0.0000 | 2.087         | 6.027 | 0.0001 | 0.0000 | -0.293         | 7.485 | 0.0045 | 0.0014 |                         |     |       |       |    |    |    |   |   |   |   |  |
| dihydrolipoamide dehydrogenase                             |            |        |        |        |            |        |        |        |              |        |        |        |             |       |        |        |               |       |        |        |                |       |        |        |                         |     |       |       |    |    |    |   |   |   |   |  |
| <b>SGO_1131</b>                                            | -2.627     | 6.185  | 0.0028 | 0.0079 | -0.208     | 6.974  | 0.0108 | 0.0364 | -0.836       | 6.722  | 0.0014 | 0.0050 | 2.419       | 5.484 | 0.0116 | 0.0560 | 1.791         | 4.327 | 0.0283 | 0.1530 | -0.628         | 6.083 | 0.0172 | 0.0217 |                         |     |       |       |    |    |    |   |   |   |   |  |
| sucB; dihydrolipoamide S-acetyltransferase                 |            |        |        |        |            |        |        |        |              |        |        |        |             |       |        |        |               |       |        |        |                |       |        |        |                         |     |       |       |    |    |    |   |   |   |   |  |
| <b>SGO_1132</b>                                            |            | 5.344  |        |        | -0.631     | 6.047  | 0.0181 | 0.0688 | -1.908       | 5.520  | 0.0242 | 0.1926 |             | 4.160 |        |        |               | 1.272 |        |        | -1.277         | 4.431 | 0.0092 | 0.0072 |                         |     |       |       |    |    |    |   |   |   |   |  |
| acetoin dehydrogenase                                      |            |        |        |        |            |        |        |        |              |        |        |        |             |       |        |        |               |       |        |        |                |       |        |        |                         |     |       |       |    |    |    |   |   |   |   |  |

Show detected proteins only  
 Show all proteins

Proteins found:  
1179

Dot Plots  
Dot Plots

Test

Cutoff

q-Value

p-Value

.005

| Signif | Direction | Applies To   |
|--------|-----------|--------------|
| yes    | +         | ratios, bars |
| no     | n/a       | bars         |
| yes    | -         | ratios, bars |
| yes    | +         | p-, q-Values |
| yes    | -         | p-, q-Values |

SgFn vs Sg — SgPg vs Sg  
SgPgFn vs Sg — SgPg vs SgFn  
SgPgFn vs SgFn — SgPg vs SgPg  
SgPgFn vs SgPg — SgPgFn vs SgPg



Summary Table SgFn vs Sg SgPg vs Sg SgPgFn vs Sg SgPg v SgFn SgPgFn v SgFn SgPgFn vs SgPg Coverage

| Protein                                                    | SgFn vs Sg    |       |        |        | SgPg vs Sg    |       |        |        | SgPgFn vs Sg  |       |        |        | SgPg v SgFn   |       |        |        | SgPgFn v SgFn |       |        |        | SgPgFn vs SgPg |       |        |        | Log <sub>2</sub> Ratios |     |       |       |    |    |    |   |   |   |   |  |
|------------------------------------------------------------|---------------|-------|--------|--------|---------------|-------|--------|--------|---------------|-------|--------|--------|---------------|-------|--------|--------|---------------|-------|--------|--------|----------------|-------|--------|--------|-------------------------|-----|-------|-------|----|----|----|---|---|---|---|--|
|                                                            | Ratio         | Sum   | q-Val  | p-Val  | Ratio         | Sum   | q-Val  | p-Val  | Ratio         | Sum   | q-Val  | p-Val  | Ratio         | Sum   | q-Val  | p-Val  | Ratio         | Sum   | q-Val  | p-Val  | Ratio          | Sum   | q-Val  | p-Val  | Ratio                   | Sum | q-Val | p-Val | -6 | -4 | -2 | 0 | 2 | 4 | 6 |  |
| <b>SGO_1133</b>                                            | -0.959        | 6.337 | 0.0317 | 0.1660 | <b>-0.813</b> | 6.658 | 0.0048 | 0.0135 | <b>-1.214</b> | 6.539 | 0.0027 | 0.0117 | 0.146         | 5.214 | 0.0706 | 0.5025 | -0.255        | 4.367 | 0.0958 | 0.6663 | -0.401         | 5.511 | 0.0753 | 0.1952 |                         |     |       |       |    |    |    |   |   |   |   |  |
| acoA; acetoin dehydrogenase                                |               |       |        |        |               |       |        |        |               |       |        |        |               |       |        |        |               |       |        |        |                |       |        |        |                         |     |       |       |    |    |    |   |   |   |   |  |
| <b>SGO_1134</b>                                            | 2.321         | 6.119 | 0.0067 | 0.0238 | -0.566        | 3.898 | 0.0626 | 0.2887 | 0.121         | 4.103 | 0.0782 | 0.7301 | -2.886        | 5.443 | 0.0357 | 0.2287 | -2.199        | 4.884 | 0.0423 | 0.2490 | 0.687          | 2.769 |        |        |                         |     |       |       |    |    |    |   |   |   |   |  |
| hypothetical protein SGO_1134                              |               |       |        |        |               |       |        |        |               |       |        |        |               |       |        |        |               |       |        |        |                |       |        |        |                         |     |       |       |    |    |    |   |   |   |   |  |
| <b>SGO_1139</b>                                            | 0.405         | 6.420 | 0.0116 | 0.0478 | <b>1.267</b>  | 6.969 | 0.0006 | 0.0007 | <b>0.580</b>  | 6.523 | 0.0034 | 0.0164 | <b>0.862</b>  | 6.582 | 0.0002 | 0.0001 | 0.176         | 5.568 | 0.0074 | 0.0275 | <b>-0.687</b>  | 6.647 | 0.0017 | 0.0002 |                         |     |       |       |    |    |    |   |   |   |   |  |
| GTP-binding protein                                        |               |       |        |        |               |       |        |        |               |       |        |        |               |       |        |        |               |       |        |        |                |       |        |        |                         |     |       |       |    |    |    |   |   |   |   |  |
| <b>SGO_1140</b>                                            | 0.128         | 8.431 | 0.0388 | 0.2102 | <b>0.482</b>  | 8.625 | 0.0017 | 0.0033 | -0.066        | 8.332 | 0.0435 | 0.3780 | <b>0.354</b>  | 8.166 | 0.0015 | 0.0034 | -0.194        | 7.274 | 0.0080 | 0.0304 | <b>-0.548</b>  | 8.083 | 0.0007 | 0.0000 |                         |     |       |       |    |    |    |   |   |   |   |  |
| clpX; ATP-dependent Clp protease, ATP-binding subunit ClpX |               |       |        |        |               |       |        |        |               |       |        |        |               |       |        |        |               |       |        |        |                |       |        |        |                         |     |       |       |    |    |    |   |   |   |   |  |
| <b>SGO_1141</b>                                            | 2.133         | 6.005 | 0.0060 | 0.0203 | 0.710         | 4.941 | 0.0144 | 0.0518 | 0.201         | 4.191 | 0.0695 | 0.6387 | -1.422        | 5.648 | 0.0080 | 0.0352 | -1.932        | 4.762 | 0.0407 | 0.2387 | -0.510         | 4.166 | 0.1108 | 0.3287 |                         |     |       |       |    |    |    |   |   |   |   |  |
| folA; dihydrofolate reductase                              |               |       |        |        |               |       |        |        |               |       |        |        |               |       |        |        |               |       |        |        |                |       |        |        |                         |     |       |       |    |    |    |   |   |   |   |  |
| <b>SGO_1143</b>                                            | 0.391         | 5.180 | 0.0534 | 0.3075 | <b>1.268</b>  | 5.705 | 0.0018 | 0.0037 | 0.799         | 4.852 | 0.0299 | 0.2442 | <b>0.877</b>  | 5.319 | 0.0041 | 0.0140 | 0.407         | 3.951 | 0.0709 | 0.4709 | -0.469         | 5.119 | 0.0256 | 0.0415 |                         |     |       |       |    |    |    |   |   |   |   |  |
| thyA; thymidylate synthase                                 |               |       |        |        |               |       |        |        |               |       |        |        |               |       |        |        |               |       |        |        |                |       |        |        |                         |     |       |       |    |    |    |   |   |   |   |  |
| <b>SGO_1144</b>                                            | <b>2.268</b>  | 9.727 | 0.0002 | 0.0001 | <b>1.912</b>  | 9.437 | 0.0000 | 0.0000 | <b>1.707</b>  | 9.282 | 0.0004 | 0.0009 | <b>-0.356</b> | 9.774 | 0.0022 | 0.0056 | <b>-0.562</b> | 9.079 | 0.0024 | 0.0060 | -0.205         | 9.487 | 0.0330 | 0.0604 |                         |     |       |       |    |    |    |   |   |   |   |  |
| glcK; glucokinase                                          |               |       |        |        |               |       |        |        |               |       |        |        |               |       |        |        |               |       |        |        |                |       |        |        |                         |     |       |       |    |    |    |   |   |   |   |  |
| <b>SGO_1145</b>                                            |               | 3.781 |        |        |               | 3.781 |        |        |               | 3.781 |        |        |               |       |        |        |               |       |        |        |                |       |        |        |                         |     |       |       |    |    |    |   |   |   |   |  |
| cell surface hydrolase                                     |               |       |        |        |               |       |        |        |               |       |        |        |               |       |        |        |               |       |        |        |                |       |        |        |                         |     |       |       |    |    |    |   |   |   |   |  |
| <b>SGO_1148</b>                                            | <b>-2.650</b> | 8.527 | 0.0003 | 0.0003 |               | 8.314 |        |        |               | 8.314 |        |        |               | 5.151 |        |        |               | 4.540 |        |        |                |       |        |        |                         |     |       |       |    |    |    |   |   |   |   |  |
| cshB; surface-associated protein CshB                      |               |       |        |        |               |       |        |        |               |       |        |        |               |       |        |        |               |       |        |        |                |       |        |        |                         |     |       |       |    |    |    |   |   |   |   |  |
| <b>SGO_1149</b>                                            |               | 3.830 |        |        |               | 3.830 |        |        |               | 3.830 |        |        |               |       |        |        |               |       |        |        |                |       |        |        |                         |     |       |       |    |    |    |   |   |   |   |  |
| Pneumococcal vaccine antigen A-like protein                |               |       |        |        |               |       |        |        |               |       |        |        |               |       |        |        |               |       |        |        |                |       |        |        |                         |     |       |       |    |    |    |   |   |   |   |  |
| <b>SGO_1150</b>                                            | 0.600         | 4.826 | 0.0397 | 0.2158 | 1.321         | 5.394 | 0.0177 | 0.0671 | 0.585         | 4.130 |        |        | <b>0.721</b>  | 5.305 | 0.0023 | 0.0062 | -0.014        | 3.870 | 0.1271 | 0.9104 | -0.736         | 4.996 | 0.0458 | 0.1000 |                         |     |       |       |    |    |    |   |   |   |   |  |
| hypothetical protein SGO_1150                              |               |       |        |        |               |       |        |        |               |       |        |        |               |       |        |        |               |       |        |        |                |       |        |        |                         |     |       |       |    |    |    |   |   |   |   |  |
| <b>SGO_1151</b>                                            | <b>2.287</b>  | 9.772 | 0.0000 | 0.0000 | <b>1.725</b>  | 9.323 | 0.0000 | 0.0000 | <b>1.614</b>  | 9.238 | 0.0001 | 0.0000 | <b>-0.562</b> | 9.736 | 0.0001 | 0.0000 | <b>-0.674</b> | 9.082 | 0.0002 | 0.0001 | -0.112         | 9.374 | 0.0151 | 0.0172 |                         |     |       |       |    |    |    |   |   |   |   |  |
| glyA; serine hydroxymethyltransferase                      |               |       |        |        |               |       |        |        |               |       |        |        |               |       |        |        |               |       |        |        |                |       |        |        |                         |     |       |       |    |    |    |   |   |   |   |  |
| <b>SGO_1154</b>                                            | 0.128         | 7.465 | 0.0957 | 0.6170 | 0.348         | 7.523 | 0.0322 | 0.1340 | 0.523         | 7.625 | 0.0085 | 0.0520 | 0.220         | 7.107 | 0.1010 | 0.7485 | 0.396         | 6.592 | 0.0614 | 0.4010 | 0.176          | 7.252 | 0.0328 | 0.0595 |                         |     |       |       |    |    |    |   |   |   |   |  |
| prfA; peptide chain release factor 1                       |               |       |        |        |               |       |        |        |               |       |        |        |               |       |        |        |               |       |        |        |                |       |        |        |                         |     |       |       |    |    |    |   |   |   |   |  |
| <b>SGO_1155</b>                                            | -1.087        | 5.504 | 0.0219 | 0.1031 | 0.258         | 6.054 | 0.1207 | 0.6079 | 0.196         | 5.567 | 0.0922 | 0.8799 | 1.345         | 5.132 | 0.0082 | 0.0365 | 1.283         | 3.830 | 0.0310 | 0.1716 | -0.062         | 5.189 | 0.2203 | 0.8197 |                         |     |       |       |    |    |    |   |   |   |   |  |
| tdk; thymidine kinase                                      |               |       |        |        |               |       |        |        |               |       |        |        |               |       |        |        |               |       |        |        |                |       |        |        |                         |     |       |       |    |    |    |   |   |   |   |  |
| <b>SGO_1159</b>                                            | 2.423         | 4.557 | 0.0157 | 0.0696 | 1.630         | 3.910 | 0.0590 | 0.2706 |               | 1.000 |        |        | -0.794        | 4.599 | 0.0100 | 0.0472 |               | 3.305 |        |        |                | 3.191 |        |        |                         |     |       |       |    |    |    |   |   |   |   |  |
| guaC; guanosine monophosphate reductase                    |               |       |        |        |               |       |        |        |               |       |        |        |               |       |        |        |               |       |        |        |                |       |        |        |                         |     |       |       |    |    |    |   |   |   |   |  |
| <b>SGO_1163</b>                                            |               |       |        |        |               |       |        |        |               | 1.981 |        |        |               |       |        |        |               | 0.857 |        |        |                | 1.468 |        |        |                         |     |       |       |    |    |    |   |   |   |   |  |
| Iron permease FTR1 family                                  |               |       |        |        |               |       |        |        |               |       |        |        |               |       |        |        |               |       |        |        |                |       |        |        |                         |     |       |       |    |    |    |   |   |   |   |  |

Show detected proteins only  
 Show all proteins

Proteins found:  
1179

Dot Plots  
Dot Plots

Test

Cutoff

q-Value

p-Value

.005

| Signif | Direction | Applies To   |
|--------|-----------|--------------|
| yes    | +         | ratios, bars |
| no     | n/a       | bars         |
| yes    | -         | ratios, bars |
| yes    | +         | p-, q-Values |
| yes    | -         | p-, q-Values |

SgFn vs Sg — SgPg vs Sg  
SgPgFn vs Sg — SgPg vs SgFn  
SgPgFn vs SgFn — SgPgFn vs SgPg

Summary Table SgFn vs Sg SgPg vs Sg SgPgFn vs Sg SgPg v SgFn SgPgFn v SgFn SgPgFn vs SgPg Coverage

| Protein                                             | SgFn vs Sg |        |        |        | SgPg vs Sg |        |        |        | SgPgFn vs Sg |        |        |        | SgPg v SgFn |        |        |        | SgPgFn v SgFn |        |        |        | SgPgFn vs SgPg |        |        |        | Log <sub>2</sub> Ratios |     |       |       |    |    |    |   |   |   |   |  |
|-----------------------------------------------------|------------|--------|--------|--------|------------|--------|--------|--------|--------------|--------|--------|--------|-------------|--------|--------|--------|---------------|--------|--------|--------|----------------|--------|--------|--------|-------------------------|-----|-------|-------|----|----|----|---|---|---|---|--|
|                                                     | Ratio      | Sum    | q-Val  | p-Val  | Ratio      | Sum    | q-Val  | p-Val  | Ratio        | Sum    | q-Val  | p-Val  | Ratio       | Sum    | q-Val  | p-Val  | Ratio         | Sum    | q-Val  | p-Val  | Ratio          | Sum    | q-Val  | p-Val  | Ratio                   | Sum | q-Val | p-Val | -6 | -4 | -2 | 0 | 2 | 4 | 6 |  |
| SGO_1166                                            |            | 3.272  |        |        |            | 3.272  |        |        |              | 3.272  |        |        |             |        |        |        |               |        |        |        |                |        |        |        |                         |     |       |       |    |    |    |   |   |   |   |  |
| voltage-gated chloride channel family protein       |            |        |        |        |            |        |        |        |              |        |        |        |             |        |        |        |               |        |        |        |                |        |        |        |                         |     |       |       |    |    |    |   |   |   |   |  |
| SGO_1167                                            | -1.132     | 7.433  | 0.0004 | 0.0005 | 0.927      | 8.426  | 0.0002 | 0.0001 | -0.299       | 7.772  | 0.0371 | 0.3123 | 2.059       | 7.614  | 0.0000 | 0.0000 | 0.833         | 6.143  | 0.0129 | 0.0571 | -1.225         | 7.832  | 0.0061 | 0.0037 |                         |     |       |       |    |    |    |   |   |   |   |  |
| nox; NADH oxidase                                   |            |        |        |        |            |        |        |        |              |        |        |        |             |        |        |        |               |        |        |        |                |        |        |        |                         |     |       |       |    |    |    |   |   |   |   |  |
| SGO_1169                                            | -0.745     | 6.887  | 0.0056 | 0.0186 | 0.631      | 7.557  | 0.0079 | 0.0244 | 0.557        | 7.504  | 0.0004 | 0.0009 | 1.376       | 6.806  | 0.0027 | 0.0078 | 1.302         | 6.132  | 0.0011 | 0.0015 | -0.074         | 7.287  | 0.1579 | 0.5196 |                         |     |       |       |    |    |    |   |   |   |   |  |
| NADPH-dependent FMN reductase                       |            |        |        |        |            |        |        |        |              |        |        |        |             |        |        |        |               |        |        |        |                |        |        |        |                         |     |       |       |    |    |    |   |   |   |   |  |
| SGO_1170                                            | -2.073     | 8.329  | 0.0001 | 0.0000 | -0.581     | 8.759  | 0.0002 | 0.0001 | -0.745       | 8.696  | 0.0002 | 0.0002 | 1.493       | 7.367  | 0.0002 | 0.0001 | 1.328         | 6.638  | 0.0006 | 0.0005 | -0.164         | 7.848  | 0.0268 | 0.0445 |                         |     |       |       |    |    |    |   |   |   |   |  |
| NADPH-dependent FMN reductase                       |            |        |        |        |            |        |        |        |              |        |        |        |             |        |        |        |               |        |        |        |                |        |        |        |                         |     |       |       |    |    |    |   |   |   |   |  |
| SGO_1171                                            | -3.650     | 7.609  | 0.0001 | 0.0001 | -4.040     | 7.574  | 0.0001 | 0.0000 |              | 7.489  |        |        | -0.390      | 4.216  | 0.0429 | 0.2851 |               | 2.839  |        |        |                | 2.937  |        |        |                         |     |       |       |    |    |    |   |   |   |   |  |
| thioredoxin family protein                          |            |        |        |        |            |        |        |        |              |        |        |        |             |        |        |        |               |        |        |        |                |        |        |        |                         |     |       |       |    |    |    |   |   |   |   |  |
| SGO_1174                                            |            | 3.417  |        |        |            | 3.417  |        |        |              | 3.417  |        |        |             |        |        |        |               |        |        |        |                |        |        |        |                         |     |       |       |    |    |    |   |   |   |   |  |
| histidine kinase                                    |            |        |        |        |            |        |        |        |              |        |        |        |             |        |        |        |               |        |        |        |                |        |        |        |                         |     |       |       |    |    |    |   |   |   |   |  |
| SGO_1176                                            |            | 0.585  |        |        |            | 0.585  |        |        |              | 0.585  |        |        |             |        |        |        |               |        |        |        |                |        |        |        |                         |     |       |       |    |    |    |   |   |   |   |  |
| peptide methionine sulfoxide reductase-like protein |            |        |        |        |            |        |        |        |              |        |        |        |             |        |        |        |               |        |        |        |                |        |        |        |                         |     |       |       |    |    |    |   |   |   |   |  |
| SGO_1182                                            |            | 1.058  |        |        |            | 1.058  |        |        |              | 1.058  |        |        |             |        |        |        |               |        |        |        |                |        |        |        |                         |     |       |       |    |    |    |   |   |   |   |  |
| LPXTG cell wall surface protein                     |            |        |        |        |            |        |        |        |              |        |        |        |             |        |        |        |               |        |        |        |                |        |        |        |                         |     |       |       |    |    |    |   |   |   |   |  |
| SGO_1184                                            |            | 3.412  |        |        |            | 3.412  |        |        |              | 3.412  |        |        |             |        |        |        |               |        |        |        |                |        |        |        |                         |     |       |       |    |    |    |   |   |   |   |  |
| GdmH                                                |            |        |        |        |            |        |        |        |              |        |        |        |             |        |        |        |               |        |        |        |                |        |        |        |                         |     |       |       |    |    |    |   |   |   |   |  |
| SGO_1185                                            | -0.148     | 4.148  | 0.1009 | 0.6525 | 1.029      | 5.215  | 0.0048 | 0.0134 | 0.351        | 4.801  | 0.0232 | 0.1848 | 1.176       | 4.409  | 0.0260 | 0.1546 | 0.498         | 3.270  | 0.0501 | 0.3038 | -0.678         | 4.825  | 0.0219 | 0.0318 |                         |     |       |       |    |    |    |   |   |   |   |  |
| acetyltransferase, GNAT family                      |            |        |        |        |            |        |        |        |              |        |        |        |             |        |        |        |               |        |        |        |                |        |        |        |                         |     |       |       |    |    |    |   |   |   |   |  |
| SGO_1186                                            |            | 5.718  |        |        |            | 5.718  |        |        |              | 5.718  |        |        |             |        |        |        |               |        |        |        |                |        |        |        |                         |     |       |       |    |    |    |   |   |   |   |  |
| ABC transporter, permease/ATP-binding protein       |            |        |        |        |            |        |        |        |              |        |        |        |             |        |        |        |               |        |        |        |                |        |        |        |                         |     |       |       |    |    |    |   |   |   |   |  |
| SGO_1187                                            |            | 6.301  |        |        |            | 6.301  |        |        |              | 6.301  |        |        |             |        |        |        |               |        |        |        |                |        |        |        |                         |     |       |       |    |    |    |   |   |   |   |  |
| ABC transporter, permease/ATP-binding protein       |            |        |        |        |            |        |        |        |              |        |        |        |             |        |        |        |               |        |        |        |                |        |        |        |                         |     |       |       |    |    |    |   |   |   |   |  |
| SGO_1189                                            | -2.586     | 9.364  | 0.0003 | 0.0004 | -3.706     | 9.249  | 0.0003 | 0.0003 | -3.464       | 9.278  | 0.0003 | 0.0004 | -1.120      | 6.592  | 0.0013 | 0.0026 | -0.877        | 6.105  | 0.0154 | 0.0708 | 0.243          | 6.125  | 0.1382 | 0.4349 |                         |     |       |       |    |    |    |   |   |   |   |  |
| lipoprotein, putative                               |            |        |        |        |            |        |        |        |              |        |        |        |             |        |        |        |               |        |        |        |                |        |        |        |                         |     |       |       |    |    |    |   |   |   |   |  |
| SGO_1191                                            | -1.030     | 11.163 | 0.0007 | 0.0010 | 0.125      | 11.651 | 0.0327 | 0.1371 | 0.717        | 11.990 | 0.0008 | 0.0022 | 1.155       | 10.733 | 0.0002 | 0.0001 | 1.746         | 10.556 | 0.0004 | 0.0002 | 0.592          | 11.525 | 0.0050 | 0.0022 |                         |     |       |       |    |    |    |   |   |   |   |  |
| rplL; ribosomal protein L7/L12                      |            |        |        |        |            |        |        |        |              |        |        |        |             |        |        |        |               |        |        |        |                |        |        |        |                         |     |       |       |    |    |    |   |   |   |   |  |
| SGO_1192                                            | -0.243     | 9.189  | 0.0417 | 0.2316 | 0.701      | 9.702  | 0.0111 | 0.0375 | -0.130       | 9.230  | 0.0106 | 0.0690 | 0.944       | 9.110  | 0.0071 | 0.0297 | 0.112         | 7.996  | 0.0872 | 0.5997 | -0.831         | 9.141  | 0.0196 | 0.0270 |                         |     |       |       |    |    |    |   |   |   |   |  |
| BL5; 50S ribosomal protein L10                      |            |        |        |        |            |        |        |        |              |        |        |        |             |        |        |        |               |        |        |        |                |        |        |        |                         |     |       |       |    |    |    |   |   |   |   |  |
| SGO_1193                                            | 1.446      | 6.759  | 0.0004 | 0.0005 | 0.996      | 6.452  | 0.0037 | 0.0096 | -0.784       | 5.522  | 0.0004 | 0.0007 | -0.451      | 6.593  | 0.0082 | 0.0371 | -2.230        | 5.464  | 0.0004 | 0.0003 | -1.780         | 5.724  | 0.0061 | 0.0036 |                         |     |       |       |    |    |    |   |   |   |   |  |
| gid; Glucose inhibited division protein A           |            |        |        |        |            |        |        |        |              |        |        |        |             |        |        |        |               |        |        |        |                |        |        |        |                         |     |       |       |    |    |    |   |   |   |   |  |

Show detected proteins only  
 Show all proteins

Proteins found:  
1179

Dot Plots  
Dot Plots

Test

Cutoff

q-Value

p-Value

.005

| Signif | Direction | Applies To   |
|--------|-----------|--------------|
| yes    | +         | ratios, bars |
| no     | n/a       | bars         |
| yes    | -         | ratios, bars |
| yes    | +         | p-, q-Values |
| yes    | -         | p-, q-Values |

SgFn vs Sg —  
SgPgFn vs Sg —  
SgPgFn vs SgFn —  
SgPg vs SgPg —  
SgPg vs SgFn —  
SgPgFn vs SgPg —

Summary Table SgFn vs Sg SgPg vs Sg SgPgFn vs Sg SgPg v SgFn SgPgFn v SgFn SgPgFn vs SgPg Coverage

| Protein                                               | SgFn vs Sg |        |        |        | SgPg vs Sg |        |        |        | SgPgFn vs Sg |       |        |        | SgPg v SgFn |        |        |        | SgPgFn v SgFn |       |        |        | SgPgFn vs SgPg |       |        |        | Log <sub>2</sub> Ratios |     |       |       |    |    |    |   |   |   |   |  |
|-------------------------------------------------------|------------|--------|--------|--------|------------|--------|--------|--------|--------------|-------|--------|--------|-------------|--------|--------|--------|---------------|-------|--------|--------|----------------|-------|--------|--------|-------------------------|-----|-------|-------|----|----|----|---|---|---|---|--|
|                                                       | Ratio      | Sum    | q-Val  | p-Val  | Ratio      | Sum    | q-Val  | p-Val  | Ratio        | Sum   | q-Val  | p-Val  | Ratio       | Sum    | q-Val  | p-Val  | Ratio         | Sum   | q-Val  | p-Val  | Ratio          | Sum   | q-Val  | p-Val  | Ratio                   | Sum | q-Val | p-Val | -6 | -4 | -2 | 0 | 2 | 4 | 6 |  |
| <b>SGO_1196</b>                                       |            | 2.227  |        |        |            | 2.227  |        |        | 1.358        | 4.061 |        |        |             |        |        |        |               | 2.461 |        |        |                | 3.072 |        |        |                         |     |       |       |    |    |    |   |   |   |   |  |
| satD; SatD-like protein                               |            |        |        |        |            |        |        |        |              |       |        |        |             |        |        |        |               |       |        |        |                |       |        |        |                         |     |       |       |    |    |    |   |   |   |   |  |
| <b>SGO_1197</b>                                       | -1.919     | 7.885  | 0.0011 | 0.0021 | -1.218     | 8.057  | 0.0018 | 0.0038 | -1.756       | 7.913 | 0.0006 | 0.0017 | 0.702       | 6.511  | 0.0076 | 0.0330 | 0.163         | 5.590 | 0.0770 | 0.5164 | -0.539         | 6.562 | 0.0140 | 0.0154 |                         |     |       |       |    |    |    |   |   |   |   |  |
| topA; DNA topoisomerase I                             |            |        |        |        |            |        |        |        |              |       |        |        |             |        |        |        |               |       |        |        |                |       |        |        |                         |     |       |       |    |    |    |   |   |   |   |  |
| <b>SGO_1198</b>                                       |            | 8.008  |        |        | -0.387     | 8.825  | 0.0055 | 0.0161 | -0.145       | 8.938 | 0.0296 | 0.2408 |             | 7.103  |        |        |               | 6.739 |        |        | 0.242          | 8.232 | 0.0289 | 0.0498 |                         |     |       |       |    |    |    |   |   |   |   |  |
| DNA processing Smf protein                            |            |        |        |        |            |        |        |        |              |       |        |        |             |        |        |        |               |       |        |        |                |       |        |        |                         |     |       |       |    |    |    |   |   |   |   |  |
| <b>SGO_1199</b>                                       |            | 2.934  |        |        | -0.356     | 3.409  | 0.0322 | 0.1336 |              | 2.934 |        |        |             | 1.063  |        |        |               |       |        |        |                | 1.063 |        |        |                         |     |       |       |    |    |    |   |   |   |   |  |
| acetyltransferase, CysE/LacA/LpxA/NodL family         |            |        |        |        |            |        |        |        |              |       |        |        |             |        |        |        |               |       |        |        |                |       |        |        |                         |     |       |       |    |    |    |   |   |   |   |  |
| <b>SGO_1202</b>                                       | 0.838      | 5.772  | 0.0078 | 0.0290 | 0.592      | 5.619  | 0.0154 | 0.0563 |              | 4.275 |        |        | -0.246      | 5.510  | 0.0543 | 0.3719 |               | 4.017 |        |        |                | 4.383 |        |        |                         |     |       |       |    |    |    |   |   |   |   |  |
| GTP-binding protein                                   |            |        |        |        |            |        |        |        |              |       |        |        |             |        |        |        |               |       |        |        |                |       |        |        |                         |     |       |       |    |    |    |   |   |   |   |  |
| <b>SGO_1203</b>                                       | 1.365      | 7.031  | 0.0011 | 0.0022 | 0.746      | 6.612  | 0.0027 | 0.0066 | 0.435        | 6.426 | 0.0071 | 0.0404 | -0.619      | 6.766  | 0.0034 | 0.0112 | -0.930        | 6.041 | 0.0020 | 0.0048 | -0.311         | 6.275 | 0.0295 | 0.0509 |                         |     |       |       |    |    |    |   |   |   |   |  |
| anaerobic ribonucleotide reductase                    |            |        |        |        |            |        |        |        |              |       |        |        |             |        |        |        |               |       |        |        |                |       |        |        |                         |     |       |       |    |    |    |   |   |   |   |  |
| <b>SGO_1205</b>                                       | 1.087      | 5.095  | 0.0245 | 0.1182 | 0.892      | 4.892  | 0.0147 | 0.0533 | 0.719        | 4.781 | 0.0129 | 0.0899 | -0.195      | 4.889  | 0.0680 | 0.4795 | -0.368        | 4.202 | 0.0507 | 0.3092 | -0.173         | 4.641 | 0.1033 | 0.2994 |                         |     |       |       |    |    |    |   |   |   |   |  |
| dapA; dihydrodipicolinate synthase                    |            |        |        |        |            |        |        |        |              |       |        |        |             |        |        |        |               |       |        |        |                |       |        |        |                         |     |       |       |    |    |    |   |   |   |   |  |
| <b>SGO_1206</b>                                       | 0.207      | 7.665  | 0.0140 | 0.0604 | -0.353     | 7.392  | 0.0040 | 0.0107 | 0.164        | 7.642 | 0.0130 | 0.0915 | -0.559      | 6.998  | 0.0013 | 0.0029 | -0.043        | 6.619 | 0.0817 | 0.5556 | 0.517          | 6.972 | 0.0053 | 0.0027 |                         |     |       |       |    |    |    |   |   |   |   |  |
| asd; aspartate-semialdehyde dehydrogenase             |            |        |        |        |            |        |        |        |              |       |        |        |             |        |        |        |               |       |        |        |                |       |        |        |                         |     |       |       |    |    |    |   |   |   |   |  |
| <b>SGO_1208</b>                                       |            | 3.604  |        |        |            | 3.604  |        |        |              | 3.604 |        |        |             |        |        |        |               |       |        |        |                |       |        |        |                         |     |       |       |    |    |    |   |   |   |   |  |
| Hypothetical FAD-dependent oxidoreductase, putative   |            |        |        |        |            |        |        |        |              |       |        |        |             |        |        |        |               |       |        |        |                |       |        |        |                         |     |       |       |    |    |    |   |   |   |   |  |
| <b>SGO_1210</b>                                       | 1.322      | 6.338  | 0.0019 | 0.0045 | 0.250      | 5.689  | 0.0723 | 0.3419 | -0.802       | 4.885 | 0.0098 | 0.0626 | -1.072      | 5.922  | 0.0057 | 0.0223 | -2.125        | 4.887 | 0.0218 | 0.1097 | -1.052         | 4.625 | 0.1103 | 0.3245 |                         |     |       |       |    |    |    |   |   |   |   |  |
| fhs-1; formate--tetrahydrofolate ligase               |            |        |        |        |            |        |        |        |              |       |        |        |             |        |        |        |               |       |        |        |                |       |        |        |                         |     |       |       |    |    |    |   |   |   |   |  |
| <b>SGO_1213</b>                                       | -1.696     | 5.911  | 0.0075 | 0.0273 | -2.296     | 5.647  | 0.0472 | 0.2066 |              | 5.513 |        |        | -0.601      | 3.733  | 0.0674 | 0.4737 |               | 2.734 |        |        |                | 1.648 |        |        |                         |     |       |       |    |    |    |   |   |   |   |  |
| coaC; phosphopantothenoylcysteine decarboxylase       |            |        |        |        |            |        |        |        |              |       |        |        |             |        |        |        |               |       |        |        |                |       |        |        |                         |     |       |       |    |    |    |   |   |   |   |  |
| <b>SGO_1215</b>                                       | 0.991      | 10.269 | 0.0005 | 0.0007 | 0.815      | 10.153 | 0.0002 | 0.0001 | 0.239        | 9.813 | 0.0014 | 0.0051 | -0.176      | 10.082 | 0.0080 | 0.0351 | -0.753        | 9.229 | 0.0009 | 0.0010 | -0.577         | 9.730 | 0.0000 | 0.0000 |                         |     |       |       |    |    |    |   |   |   |   |  |
| manB; phosphomannomutase                              |            |        |        |        |            |        |        |        |              |       |        |        |             |        |        |        |               |       |        |        |                |       |        |        |                         |     |       |       |    |    |    |   |   |   |   |  |
| <b>SGO_1216</b>                                       | 1.372      | 6.913  | 0.0009 | 0.0017 | 1.790      | 7.228  | 0.0010 | 0.0016 | 1.150        | 6.754 | 0.0004 | 0.0009 | 0.419       | 7.152  | 0.0080 | 0.0349 | -0.222        | 6.206 | 0.0131 | 0.0582 | -0.641         | 7.060 | 0.0103 | 0.0094 |                         |     |       |       |    |    |    |   |   |   |   |  |
| bta; Possible bacteriocin transport accessory protein |            |        |        |        |            |        |        |        |              |       |        |        |             |        |        |        |               |       |        |        |                |       |        |        |                         |     |       |       |    |    |    |   |   |   |   |  |
| <b>SGO_1219</b>                                       | 0.989      | 8.278  | 0.0179 | 0.0802 | 0.089      | 7.683  | 0.0652 | 0.3035 | -0.058       | 7.613 | 0.0681 | 0.6240 | -0.901      | 7.792  | 0.0163 | 0.0896 | -1.048        | 7.136 | 0.0161 | 0.0745 | -0.147         | 7.143 | 0.0656 | 0.1621 |                         |     |       |       |    |    |    |   |   |   |   |  |
| pta; phosphate acetyltransferase                      |            |        |        |        |            |        |        |        |              |       |        |        |             |        |        |        |               |       |        |        |                |       |        |        |                         |     |       |       |    |    |    |   |   |   |   |  |
| <b>SGO_1221</b>                                       | -2.962     | 7.363  | 0.0009 | 0.0017 |            | 7.145  |        |        |              | 7.145 |        |        |             | 4.019  |        |        |               | 3.408 |        |        |                |       |        |        |                         |     |       |       |    |    |    |   |   |   |   |  |
| ppnK; Probable inorganic polyphosphate/ATP-NAD kinase |            |        |        |        |            |        |        |        |              |       |        |        |             |        |        |        |               |       |        |        |                |       |        |        |                         |     |       |       |    |    |    |   |   |   |   |  |
| <b>SGO_1222</b>                                       | -1.021     | 4.154  | 0.0070 | 0.0250 | -0.323     | 4.321  | 0.0170 | 0.0631 |              | 3.836 |        |        | 0.698       | 2.693  |        |        |               | 0.692 |        |        |                | 2.000 |        |        |                         |     |       |       |    |    |    |   |   |   |   |  |
| GTP pyrophosphokinase-like protein                    |            |        |        |        |            |        |        |        |              |       |        |        |             |        |        |        |               |       |        |        |                |       |        |        |                         |     |       |       |    |    |    |   |   |   |   |  |

Show detected proteins only  
 Show all proteins

Filter by category:  
ABC Transporter

Proteins found:  
1179

Dot Plots  
Dot Plots

Test

Cutoff

q-Value

p-Value

.005

| Signif | Direction | Applies To   |
|--------|-----------|--------------|
| yes    | +         | ratios, bars |
| no     | n/a       | bars         |
| yes    | -         | ratios, bars |
| yes    | +         | p-, q-Values |
| yes    | -         | p-, q-Values |

SgFn vs Sg — — SgPg vs Sg  
SgPgFn vs Sg — — SgPg v SgFn  
SgPgFn vs SgFn — — SgPgFn vs SgPg

Summary Table SgFn vs Sg SgPg vs Sg SgPgFn vs Sg SgPg v SgFn SgPgFn v SgFn SgPgFn vs SgPg Coverage

| Protein                                          | SgFn vs Sg |        |        |        | SgPg vs Sg |        |        |        | SgPgFn vs Sg |        |        |        | SgPg v SgFn |        |        |        | SgPgFn v SgFn |        |        |        | SgPgFn vs SgPg |        |        |        | Log <sub>2</sub> Ratios |     |       |       |    |    |    |   |   |   |   |  |
|--------------------------------------------------|------------|--------|--------|--------|------------|--------|--------|--------|--------------|--------|--------|--------|-------------|--------|--------|--------|---------------|--------|--------|--------|----------------|--------|--------|--------|-------------------------|-----|-------|-------|----|----|----|---|---|---|---|--|
|                                                  | Ratio      | Sum    | q-Val  | p-Val  | Ratio      | Sum    | q-Val  | p-Val  | Ratio        | Sum    | q-Val  | p-Val  | Ratio       | Sum    | q-Val  | p-Val  | Ratio         | Sum    | q-Val  | p-Val  | Ratio          | Sum    | q-Val  | p-Val  | Ratio                   | Sum | q-Val | p-Val | -6 | -4 | -2 | 0 | 2 | 4 | 6 |  |
| <b>SGO_1224</b>                                  | -0.808     | 8.161  | 0.0001 | 0.0001 | 0.647      | 8.869  | 0.0008 | 0.0012 | 0.425        | 8.740  | 0.0033 | 0.0157 | 1.455       | 8.092  | 0.0003 | 0.0002 | 1.233         | 7.325  | 0.0011 | 0.0015 | -0.222         | 8.539  | 0.0384 | 0.0755 |                         |     |       |       |    |    |    |   |   |   |   |  |
| Ribose-phosphate pyrophosphokinase 2             |            |        |        |        |            |        |        |        |              |        |        |        |             |        |        |        |               |        |        |        |                |        |        |        |                         |     |       |       |    |    |    |   |   |   |   |  |
| <b>SGO_1225</b>                                  | 0.444      | 5.289  | 0.0259 | 0.1290 | 0.546      | 5.333  | 0.0081 | 0.0252 | 0.465        | 5.279  | 0.0018 | 0.0070 | 0.103       | 5.035  | 0.1024 | 0.7602 | 0.021         | 4.378  | 0.1295 | 0.9390 | -0.082         | 5.027  | 0.1579 | 0.5157 |                         |     |       |       |    |    |    |   |   |   |   |  |
| pyridoxal-phosphate dependent aminotransferase   |            |        |        |        |            |        |        |        |              |        |        |        |             |        |        |        |               |        |        |        |                |        |        |        |                         |     |       |       |    |    |    |   |   |   |   |  |
| <b>SGO_1226</b>                                  | 0.554      | 6.560  | 0.0306 | 0.1599 | 0.436      | 6.473  | 0.0366 | 0.1558 | 0.231        | 6.360  | 0.0532 | 0.4709 | -0.118      | 6.216  | 0.0701 | 0.4969 | -0.323        | 5.511  | 0.0327 | 0.1832 | -0.205         | 6.039  | 0.0203 | 0.0288 |                         |     |       |       |    |    |    |   |   |   |   |  |
| hypothetical protein SGO_1226                    |            |        |        |        |            |        |        |        |              |        |        |        |             |        |        |        |               |        |        |        |                |        |        |        |                         |     |       |       |    |    |    |   |   |   |   |  |
| <b>SGO_1228</b>                                  | 1.028      | 5.079  | 0.0021 | 0.0053 | 0.534      | 4.773  | 0.0171 | 0.0636 |              | 3.494  |        |        | -0.494      | 4.758  | 0.0045 | 0.0167 |               | 3.371  |        |        |                | 3.494  |        |        |                         |     |       |       |    |    |    |   |   |   |   |  |
| DNA-binding protein BH0551                       |            |        |        |        |            |        |        |        |              |        |        |        |             |        |        |        |               |        |        |        |                |        |        |        |                         |     |       |       |    |    |    |   |   |   |   |  |
| <b>SGO_1230</b>                                  |            | 6.030  |        |        | -2.690     | 6.240  | 0.0003 | 0.0003 |              | 6.030  |        |        |             | 2.844  |        |        |               |        |        |        |                | 2.844  |        |        |                         |     |       |       |    |    |    |   |   |   |   |  |
| srtA; sortase A                                  |            |        |        |        |            |        |        |        |              |        |        |        |             |        |        |        |               |        |        |        |                |        |        |        |                         |     |       |       |    |    |    |   |   |   |   |  |
| <b>SGO_1231</b>                                  | -0.634     | 8.407  | 0.0061 | 0.0209 | -1.323     | 8.182  | 0.0024 | 0.0054 | -1.868       | 8.032  | 0.0004 | 0.0008 | -0.689      | 7.258  | 0.0135 | 0.0698 | -1.234        | 6.445  | 0.0028 | 0.0078 | -0.544         | 6.626  | 0.0495 | 0.1114 |                         |     |       |       |    |    |    |   |   |   |   |  |
| gyrA; DNA gyrase, A subunit                      |            |        |        |        |            |        |        |        |              |        |        |        |             |        |        |        |               |        |        |        |                |        |        |        |                         |     |       |       |    |    |    |   |   |   |   |  |
| <b>SGO_1232</b>                                  | 2.961      | 10.386 | 0.0001 | 0.0000 | 2.941      | 10.367 | 0.0001 | 0.0000 | 3.026        | 10.443 | 0.0000 | 0.0000 | -0.020      | 10.687 | 0.0601 | 0.4179 | 0.065         | 10.119 | 0.0078 | 0.0295 | 0.085          | 10.720 | 0.0113 | 0.0108 |                         |     |       |       |    |    |    |   |   |   |   |  |
| L-lactate dehydrogenase                          |            |        |        |        |            |        |        |        |              |        |        |        |             |        |        |        |               |        |        |        |                |        |        |        |                         |     |       |       |    |    |    |   |   |   |   |  |
| <b>SGO_1234</b>                                  | -0.416     | 10.488 | 0.0136 | 0.0581 | 0.414      | 10.895 | 0.0030 | 0.0073 | 0.581        | 10.993 | 0.0008 | 0.0023 | 0.829       | 10.222 | 0.0014 | 0.0032 | 0.997         | 9.720  | 0.0011 | 0.0016 | 0.167          | 10.658 | 0.0048 | 0.0016 |                         |     |       |       |    |    |    |   |   |   |   |  |
| rpsA; 30S ribosomal protein S1                   |            |        |        |        |            |        |        |        |              |        |        |        |             |        |        |        |               |        |        |        |                |        |        |        |                         |     |       |       |    |    |    |   |   |   |   |  |
| <b>SGO_1237</b>                                  |            | 5.031  |        |        | 0.373      | 6.228  | 0.0055 | 0.0159 | 0.822        | 6.561  | 0.0153 | 0.1106 |             | 4.888  |        |        |               | 4.824  |        |        | 0.449          | 6.187  | 0.0848 | 0.2281 |                         |     |       |       |    |    |    |   |   |   |   |  |
| hypothetical protein SGO_1237                    |            |        |        |        |            |        |        |        |              |        |        |        |             |        |        |        |               |        |        |        |                |        |        |        |                         |     |       |       |    |    |    |   |   |   |   |  |
| <b>SGO_1238</b>                                  | 1.196      | 7.844  | 0.0074 | 0.0267 | 0.021      | 7.106  | 0.1464 | 0.7601 | -0.322       | 6.950  | 0.0122 | 0.0839 | -1.175      | 7.336  | 0.0066 | 0.0269 | -1.517        | 6.634  | 0.0056 | 0.0194 | -0.343         | 6.447  | 0.0305 | 0.0530 |                         |     |       |       |    |    |    |   |   |   |   |  |
| ilvE; branched-chain amino acid aminotransferase |            |        |        |        |            |        |        |        |              |        |        |        |             |        |        |        |               |        |        |        |                |        |        |        |                         |     |       |       |    |    |    |   |   |   |   |  |
| <b>SGO_1239</b>                                  | -2.435     | 6.547  | 0.0006 | 0.0010 | -1.117     | 6.822  | 0.0003 | 0.0003 | -2.990       | 6.446  | 0.0001 | 0.0001 | 1.318       | 5.182  | 0.0052 | 0.0202 | -0.555        | 3.569  | 0.0403 | 0.2359 | -1.874         | 4.994  | 0.0012 | 0.0001 |                         |     |       |       |    |    |    |   |   |   |   |  |
| parC; DNA topoisomerase IV, A subunit            |            |        |        |        |            |        |        |        |              |        |        |        |             |        |        |        |               |        |        |        |                |        |        |        |                         |     |       |       |    |    |    |   |   |   |   |  |
| <b>SGO_1241</b>                                  |            | 2.946  |        |        |            | 2.946  |        |        |              | 2.946  |        |        |             |        |        |        |               |        |        |        |                |        |        |        |                         |     |       |       |    |    |    |   |   |   |   |  |
| aminoglycoside adenylyltransferase               |            |        |        |        |            |        |        |        |              |        |        |        |             |        |        |        |               |        |        |        |                |        |        |        |                         |     |       |       |    |    |    |   |   |   |   |  |
| <b>SGO_1242</b>                                  |            | 7.113  |        |        | -2.894     | 7.207  | 0.0175 | 0.0659 | -2.541       | 7.232  | 0.0106 | 0.0688 |             | 2.700  |        |        |               | 2.442  |        |        | 0.352          | 3.887  |        |        |                         |     |       |       |    |    |    |   |   |   |   |  |
| lipoprotein, putative                            |            |        |        |        |            |        |        |        |              |        |        |        |             |        |        |        |               |        |        |        |                |        |        |        |                         |     |       |       |    |    |    |   |   |   |   |  |
| <b>SGO_1244</b>                                  |            | 4.043  |        |        | 0.288      | 5.085  | 0.1646 | 0.8635 |              | 4.043  |        |        |             | 3.612  |        |        |               |        |        |        |                | 3.612  |        |        |                         |     |       |       |    |    |    |   |   |   |   |  |
| hypothetical protein SGO_1244                    |            |        |        |        |            |        |        |        |              |        |        |        |             |        |        |        |               |        |        |        |                |        |        |        |                         |     |       |       |    |    |    |   |   |   |   |  |
| <b>SGO_1245</b>                                  |            | 5.347  |        |        | -1.278     | 5.846  | 0.0026 | 0.0059 |              | 5.347  |        |        |             | 3.560  |        |        |               |        |        |        |                | 3.560  |        |        |                         |     |       |       |    |    |    |   |   |   |   |  |
| parE; DNA topoisomerase IV, B subunit            |            |        |        |        |            |        |        |        |              |        |        |        |             |        |        |        |               |        |        |        |                |        |        |        |                         |     |       |       |    |    |    |   |   |   |   |  |
| <b>SGO_1246</b>                                  |            | 3.940  |        |        |            | 3.940  |        |        |              | 3.940  |        |        |             |        |        |        |               |        |        |        |                |        |        |        |                         |     |       |       |    |    |    |   |   |   |   |  |
| hypothetical protein SGO_1246                    |            |        |        |        |            |        |        |        |              |        |        |        |             |        |        |        |               |        |        |        |                |        |        |        |                         |     |       |       |    |    |    |   |   |   |   |  |

Show detected proteins only  
 Show all proteins

Filter by category:  
ABC Transporter

Proteins found:  
1179

Dot Plots  
Dot Plots

Test

Cutoff

q-Value

p-Value

.005

| Signif | Direction | Applies To   |
|--------|-----------|--------------|
| yes    | +         | ratios, bars |
| no     | n/a       | bars         |
| yes    | -         | ratios, bars |
| yes    | +         | p-, q-Values |
| yes    | -         | p-, q-Values |

SgFn vs Sg —  
SgPgFn vs Sg —  
SgPgFn vs SgFn —

— SgPg vs Sg  
— SgPg vs SgFn  
— SgPgFn vs SgPg

Summary Table SgFn vs Sg SgPg vs Sg SgPgFn vs Sg SgPg v SgFn SgPgFn v SgFn SgPgFn vs SgPg Coverage

| Protein                                                           | SgFn vs Sg |        |        |        | SgPg vs Sg |        |        |        | SgPgFn vs Sg |       |        |        | SgPg v SgFn |       |        |        | SgPgFn v SgFn |       |        |        | SgPgFn vs SgPg |       |        |        | Log <sub>2</sub> Ratios |     |       |       |    |    |    |   |   |   |   |  |
|-------------------------------------------------------------------|------------|--------|--------|--------|------------|--------|--------|--------|--------------|-------|--------|--------|-------------|-------|--------|--------|---------------|-------|--------|--------|----------------|-------|--------|--------|-------------------------|-----|-------|-------|----|----|----|---|---|---|---|--|
|                                                                   | Ratio      | Sum    | q-Val  | p-Val  | Ratio      | Sum    | q-Val  | p-Val  | Ratio        | Sum   | q-Val  | p-Val  | Ratio       | Sum   | q-Val  | p-Val  | Ratio         | Sum   | q-Val  | p-Val  | Ratio          | Sum   | q-Val  | p-Val  | Ratio                   | Sum | q-Val | p-Val | -6 | -4 | -2 | 0 | 2 | 4 | 6 |  |
| SGO_1247                                                          | -1.887     | 9.490  | 0.0001 | 0.0000 |            | 9.144  |        |        |              | 9.144 |        |        |             | 6.747 |        |        |               | 6.136 |        |        |                |       |        |        |                         |     |       |       |    |    |    |   |   |   |   |  |
| 5'-nucleotidase family protein                                    |            |        |        |        |            |        |        |        |              |       |        |        |             |       |        |        |               |       |        |        |                |       |        |        |                         |     |       |       |    |    |    |   |   |   |   |  |
| SGO_1248                                                          | 1.629      | 6.962  | 0.0102 | 0.0400 | 0.664      | 6.259  | 0.0221 | 0.0871 | -0.668       | 5.583 | 0.0094 | 0.0593 | -0.965      | 6.635 | 0.0161 | 0.0872 | -2.297        | 5.699 | 0.0069 | 0.0249 | -1.332         | 5.511 | 0.0136 | 0.0148 |                         |     |       |       |    |    |    |   |   |   |   |  |
| pyrC; dihydroorotase                                              |            |        |        |        |            |        |        |        |              |       |        |        |             |       |        |        |               |       |        |        |                |       |        |        |                         |     |       |       |    |    |    |   |   |   |   |  |
| SGO_1250                                                          | 0.002      | 5.377  | 0.1241 | 0.8174 |            | 4.412  |        |        |              | 4.412 |        |        |             | 3.829 |        |        |               | 3.218 |        |        |                |       |        |        |                         |     |       |       |    |    |    |   |   |   |   |  |
| ung; uracil-DNA glycosylase                                       |            |        |        |        |            |        |        |        |              |       |        |        |             |       |        |        |               |       |        |        |                |       |        |        |                         |     |       |       |    |    |    |   |   |   |   |  |
| SGO_1251                                                          |            | 1.841  |        |        |            | 1.841  |        |        |              | 1.841 |        |        |             |       |        |        |               |       |        |        |                |       |        |        |                         |     |       |       |    |    |    |   |   |   |   |  |
| hypothetical protein SGO_1251                                     |            |        |        |        |            |        |        |        |              |       |        |        |             |       |        |        |               |       |        |        |                |       |        |        |                         |     |       |       |    |    |    |   |   |   |   |  |
| SGO_1252                                                          |            | 1.322  |        |        |            | 1.322  |        |        |              | 1.322 |        |        |             |       |        |        |               |       |        |        |                |       |        |        |                         |     |       |       |    |    |    |   |   |   |   |  |
| integral membrane protein, putative                               |            |        |        |        |            |        |        |        |              |       |        |        |             |       |        |        |               |       |        |        |                |       |        |        |                         |     |       |       |    |    |    |   |   |   |   |  |
| SGO_1253                                                          | -0.416     | 6.262  | 0.0462 | 0.2609 | 0.695      | 6.813  | 0.0038 | 0.0099 | 0.357        | 6.621 | 0.0183 | 0.1387 | 1.111       | 6.169 | 0.0032 | 0.0103 | 0.773         | 5.347 | 0.0134 | 0.0603 | -0.339         | 6.446 | 0.0353 | 0.0668 |                         |     |       |       |    |    |    |   |   |   |   |  |
| pyrE; orotate phosphoribosyltransferase                           |            |        |        |        |            |        |        |        |              |       |        |        |             |       |        |        |               |       |        |        |                |       |        |        |                         |     |       |       |    |    |    |   |   |   |   |  |
| SGO_1254                                                          |            | 4.699  |        |        | -1.011     | 5.018  | 0.0244 | 0.0978 |              | 4.699 |        |        |             | 2.170 |        |        |               |       |        |        |                | 2.170 |        |        |                         |     |       |       |    |    |    |   |   |   |   |  |
| pyrF; orotidine 5'-phosphate decarboxylase                        |            |        |        |        |            |        |        |        |              |       |        |        |             |       |        |        |               |       |        |        |                |       |        |        |                         |     |       |       |    |    |    |   |   |   |   |  |
| SGO_1255                                                          |            | 2.824  |        |        | -0.177     | 3.313  | 0.1403 | 0.7201 |              | 2.824 |        |        |             | 1.000 |        |        |               |       |        |        |                | 1.000 |        |        |                         |     |       |       |    |    |    |   |   |   |   |  |
| pyrD; dihydroorotate dehydrogenase B                              |            |        |        |        |            |        |        |        |              |       |        |        |             |       |        |        |               |       |        |        |                |       |        |        |                         |     |       |       |    |    |    |   |   |   |   |  |
| SGO_1257                                                          | 1.286      | 5.778  | 0.0098 | 0.0384 | 0.296      | 5.116  | 0.0467 | 0.2042 |              | 3.977 |        |        | -0.991      | 5.347 | 0.0106 | 0.0504 |               | 4.167 |        |        |                | 3.730 |        |        |                         |     |       |       |    |    |    |   |   |   |   |  |
| probable transcriptional regulator (LysR family)                  |            |        |        |        |            |        |        |        |              |       |        |        |             |       |        |        |               |       |        |        |                |       |        |        |                         |     |       |       |    |    |    |   |   |   |   |  |
| SGO_1258                                                          | -0.144     | 4.608  | 0.0885 | 0.5643 |            | 3.718  |        |        |              | 3.718 |        |        |             | 2.976 |        |        |               | 2.366 |        |        |                |       |        |        |                         |     |       |       |    |    |    |   |   |   |   |  |
| NAD-dependent deacetylase (Regulatory protein SIR2-like protein)  |            |        |        |        |            |        |        |        |              |       |        |        |             |       |        |        |               |       |        |        |                |       |        |        |                         |     |       |       |    |    |    |   |   |   |   |  |
| SGO_1260                                                          | -0.908     | 7.764  | 0.0001 | 0.0001 | 0.150      | 8.225  | 0.0058 | 0.0171 | 0.150        | 8.227 | 0.0123 | 0.0845 | 1.058       | 7.351 | 0.0002 | 0.0002 | 1.059         | 6.742 | 0.0009 | 0.0010 | 0.001          | 7.787 | 0.2478 | 0.9628 |                         |     |       |       |    |    |    |   |   |   |   |  |
| deoD; purine nucleoside phosphorylase                             |            |        |        |        |            |        |        |        |              |       |        |        |             |       |        |        |               |       |        |        |                |       |        |        |                         |     |       |       |    |    |    |   |   |   |   |  |
| SGO_1261                                                          |            | 1.807  |        |        |            | 1.807  |        |        |              | 1.807 |        |        |             |       |        |        |               |       |        |        |                |       |        |        |                         |     |       |       |    |    |    |   |   |   |   |  |
| glutamine amidotransferase, class I                               |            |        |        |        |            |        |        |        |              |       |        |        |             |       |        |        |               |       |        |        |                |       |        |        |                         |     |       |       |    |    |    |   |   |   |   |  |
| SGO_1263                                                          | -1.173     | 8.218  | 0.0007 | 0.0011 | 0.330      | 8.861  | 0.0049 | 0.0137 | -0.436       | 8.496 | 0.0106 | 0.0693 | 1.503       | 7.938 | 0.0002 | 0.0001 | 0.737         | 6.819 | 0.0083 | 0.0316 | -0.766         | 8.178 | 0.0100 | 0.0088 |                         |     |       |       |    |    |    |   |   |   |   |  |
| purine nucleoside phosphorylase I, inosine and guanosine-specific |            |        |        |        |            |        |        |        |              |       |        |        |             |       |        |        |               |       |        |        |                |       |        |        |                         |     |       |       |    |    |    |   |   |   |   |  |
| SGO_1264                                                          | 0.143      | 10.075 | 0.0658 | 0.3970 | 0.019      | 10.003 | 0.1710 | 0.9034 | -0.125       | 9.941 | 0.0572 | 0.5115 | -0.124      | 9.567 | 0.0535 | 0.3653 | -0.269        | 8.897 | 0.0403 | 0.2361 | -0.144         | 9.434 | 0.1271 | 0.3944 |                         |     |       |       |    |    |    |   |   |   |   |  |
| deoB; phosphopentomutase                                          |            |        |        |        |            |        |        |        |              |       |        |        |             |       |        |        |               |       |        |        |                |       |        |        |                         |     |       |       |    |    |    |   |   |   |   |  |
| SGO_1265                                                          | -0.125     | 7.240  | 0.0847 | 0.5356 | 0.958      | 7.844  | 0.0077 | 0.0238 | 0.677        | 7.670 | 0.0125 | 0.0861 | 1.083       | 7.260 | 0.0003 | 0.0002 | 0.802         | 6.467 | 0.0014 | 0.0026 | -0.281         | 7.570 | 0.0190 | 0.0257 |                         |     |       |       |    |    |    |   |   |   |   |  |
| rpiA; ribose 5-phosphate isomerase                                |            |        |        |        |            |        |        |        |              |       |        |        |             |       |        |        |               |       |        |        |                |       |        |        |                         |     |       |       |    |    |    |   |   |   |   |  |
| SGO_1266                                                          | 0.968      | 6.266  | 0.0005 | 0.0007 | 0.882      | 6.214  | 0.0025 | 0.0058 | 0.563        | 6.020 | 0.0059 | 0.0320 | -0.086      | 6.119 | 0.0707 | 0.5041 | -0.405        | 5.365 | 0.0117 | 0.0504 | -0.319         | 5.932 | 0.0570 | 0.1353 |                         |     |       |       |    |    |    |   |   |   |   |  |
| trmE; tRNA modification GTPase TrmE                               |            |        |        |        |            |        |        |        |              |       |        |        |             |       |        |        |               |       |        |        |                |       |        |        |                         |     |       |       |    |    |    |   |   |   |   |  |

Show detected proteins only  
 Show all proteins

Proteins found:  
1179

Filter by category:  
ABC Transporter

Dot Plots  
Dot Plots

Test

Cutoff

q-Value

p-Value

.005

| Signif | Direction | Applies To   |
|--------|-----------|--------------|
| yes    | +         | ratios, bars |
| no     | n/a       | bars         |
| yes    | -         | ratios, bars |
| yes    | +         | p-, q-Values |
| yes    | -         | p-, q-Values |

SgFn vs Sg — — SgPg vs Sg  
SgPgFn vs Sg — — SgPg v SgFn  
SgPgFn vs SgFn — — SgPgFn vs SgPg  
SgPgFn vs SgPg — — SgPgFn vs SgPg

Summary Table SgFn vs Sg SgPg vs Sg SgPgFn vs Sg SgPg v SgFn SgPgFn v SgFn SgPgFn vs SgPg Coverage

| Protein                                                                 | SgFn vs Sg |       |        |        | SgPg vs Sg |       |        |        | SgPgFn vs Sg |       |        |        | SgPg v SgFn |       |        |        | SgPgFn v SgFn |       |        |        | SgPgFn vs SgPg |       |        |        | Log <sub>2</sub> Ratios |     |       |       |    |    |    |   |   |   |   |  |
|-------------------------------------------------------------------------|------------|-------|--------|--------|------------|-------|--------|--------|--------------|-------|--------|--------|-------------|-------|--------|--------|---------------|-------|--------|--------|----------------|-------|--------|--------|-------------------------|-----|-------|-------|----|----|----|---|---|---|---|--|
|                                                                         | Ratio      | Sum   | q-Val  | p-Val  | Ratio      | Sum   | q-Val  | p-Val  | Ratio        | Sum   | q-Val  | p-Val  | Ratio       | Sum   | q-Val  | p-Val  | Ratio         | Sum   | q-Val  | p-Val  | Ratio          | Sum   | q-Val  | p-Val  | Ratio                   | Sum | q-Val | p-Val | -6 | -4 | -2 | 0 | 2 | 4 | 6 |  |
| <b>SGO_1267</b><br>thioredoxin family protein                           |            | 5.406 |        |        | -1.825     | 5.596 | 0.0185 | 0.0707 |              | 5.406 |        |        |             | 2.063 |        |        |               |       |        |        |                | 2.063 |        |        |                         |     |       |       |    |    |    |   |   |   |   |  |
| <b>SGO_1273</b><br>rpoD; RNA polymerase sigma factor                    | 0.309      | 7.412 | 0.0431 | 0.2413 | 1.903      | 8.469 | 0.0001 | 0.0000 | 1.987        | 8.558 | 0.0018 | 0.0070 | 1.594       | 8.036 | 0.0006 | 0.0008 | 1.678         | 7.509 | 0.0037 | 0.0108 | 0.084          | 8.669 | 0.1635 | 0.5535 |                         |     |       |       |    |    |    |   |   |   |   |  |
| <b>SGO_1274</b><br>dnaG; DNA primase                                    |            | 3.105 |        |        | 0.563      | 4.342 | 0.0490 | 0.2164 |              | 3.105 |        |        |             | 3.032 |        |        |               |       |        |        |                | 3.032 |        |        |                         |     |       |       |    |    |    |   |   |   |   |  |
| <b>SGO_1276</b><br>rpsU; ribosomal protein S21                          | -1.596     | 7.134 | 0.0001 | 0.0000 | 0.281      | 7.872 | 0.0142 | 0.0507 | 0.481        | 7.989 | 0.0059 | 0.0324 | 1.877       | 6.842 | 0.0007 | 0.0010 | 2.077         | 6.395 | 0.0013 | 0.0021 | 0.200          | 7.602 | 0.0874 | 0.2374 |                         |     |       |       |    |    |    |   |   |   |   |  |
| <b>SGO_1280</b><br>putative membrane-associated Zn-dependent protease   |            | 3.549 |        |        |            | 3.549 |        |        |              | 3.549 |        |        |             |       |        |        |               |       |        |        |                |       |        |        |                         |     |       |       |    |    |    |   |   |   |   |  |
| <b>SGO_1281</b><br>penicillinase repressor, putative                    | -0.896     | 4.066 | 0.0337 | 0.1781 | 0.982      | 5.300 | 0.0047 | 0.0128 | -0.127       | 4.265 | 0.0675 | 0.6167 | 1.879       | 4.379 | 0.0216 | 0.1249 | 0.770         | 2.127 |        |        | -1.109         | 4.494 | 0.0665 | 0.1670 |                         |     |       |       |    |    |    |   |   |   |   |  |
| <b>SGO_1283</b><br>oxidoreductase                                       | -0.373     | 7.916 | 0.0112 | 0.0452 | 0.742      | 8.503 | 0.0003 | 0.0003 | 0.335        | 8.261 | 0.0009 | 0.0029 | 1.115       | 7.864 | 0.0006 | 0.0008 | 0.708         | 6.989 | 0.0018 | 0.0041 | -0.407         | 8.123 | 0.0016 | 0.0002 |                         |     |       |       |    |    |    |   |   |   |   |  |
| <b>SGO_1284</b><br>thioredoxin-disulfide reductase                      | -0.375     | 5.791 | 0.0754 | 0.4661 | 0.132      | 6.048 | 0.1080 | 0.5381 | 0.103        | 5.968 | 0.0455 | 0.3963 | 0.508       | 5.424 | 0.0537 | 0.3677 | 0.479         | 4.727 | 0.0518 | 0.3205 | -0.029         | 5.586 | 0.1982 | 0.7089 |                         |     |       |       |    |    |    |   |   |   |   |  |
| <b>SGO_1290</b><br>ABC transporter, permease/ATP-binding protein        |            | 4.483 |        |        |            | 4.483 |        |        |              | 4.483 |        |        |             |       |        |        |               |       |        |        |                |       |        |        |                         |     |       |       |    |    |    |   |   |   |   |  |
| <b>SGO_1291</b><br>ABC transporter, permease/ATP-binding protein SP1358 |            | 3.115 |        |        |            | 3.115 |        |        |              | 3.115 |        |        |             |       |        |        |               |       |        |        |                |       |        |        |                         |     |       |       |    |    |    |   |   |   |   |  |
| <b>SGO_1293</b><br>asnS; asparaginyl-tRNA synthetase                    | 0.127      | 7.656 | 0.0294 | 0.1508 | 0.430      | 7.822 | 0.0034 | 0.0085 | 0.069        | 7.646 | 0.0692 | 0.6353 | 0.303       | 7.365 | 0.0076 | 0.0328 | -0.058        | 6.586 | 0.1292 | 0.9336 | -0.362         | 7.357 | 0.0731 | 0.1879 |                         |     |       |       |    |    |    |   |   |   |   |  |
| <b>SGO_1297</b><br>aspC; aspartate aminotransferase                     | 2.252      | 7.245 | 0.0019 | 0.0046 | 0.992      | 6.280 | 0.0004 | 0.0005 | 1.112        | 6.360 | 0.0001 | 0.0000 | -1.260      | 6.958 | 0.0033 | 0.0109 | -1.140        | 6.383 | 0.0042 | 0.0127 | 0.120          | 6.240 | 0.0340 | 0.0635 |                         |     |       |       |    |    |    |   |   |   |   |  |
| <b>SGO_1298</b><br>hypothetical protein SGO_1298                        |            | 3.425 |        |        |            | 3.425 |        |        |              | 3.425 |        |        |             |       |        |        |               |       |        |        |                |       |        |        |                         |     |       |       |    |    |    |   |   |   |   |  |
| <b>SGO_1305</b><br>substrate-binding protein MsmE                       |            | 5.520 |        |        | -0.420     | 6.325 | 0.0004 | 0.0004 | -1.367       | 5.998 | 0.0004 | 0.0007 |             | 4.586 |        |        |               | 3.048 |        |        | -0.947         | 5.196 | 0.0053 | 0.0026 |                         |     |       |       |    |    |    |   |   |   |   |  |
| <b>SGO_1312</b><br>pepT; peptidase T                                    | 3.698      | 7.531 | 0.0000 | 0.0000 | 3.727      | 7.558 | 0.0001 | 0.0000 | 3.152        | 7.040 | 0.0004 | 0.0009 | 0.028       | 7.925 | 0.0440 | 0.2936 | -0.546        | 7.056 | 0.0025 | 0.0065 | -0.574         | 7.684 | 0.0079 | 0.0057 |                         |     |       |       |    |    |    |   |   |   |   |  |
| <b>SGO_1314</b><br>metal binding lipoprotein                            |            | 1.807 |        |        |            | 1.807 |        |        |              | 1.807 |        |        |             |       |        |        |               |       |        |        |                |       |        |        |                         |     |       |       |    |    |    |   |   |   |   |  |

Show detected proteins only  
 Show all proteins

Proteins found:  
1179

Dot Plots  
Dot Plots

Test

Cutoff

q-Value

p-Value

.005

| Signif | Direction | Applies To   |
|--------|-----------|--------------|
| yes    | +         | ratios, bars |
| no     | n/a       | bars         |
| yes    | -         | ratios, bars |
| yes    | +         | p-, q-Values |
| yes    | -         | p-, q-Values |

SgFn vs Sg —  
SgPgFn vs Sg —  
SgPgFn vs SgFn —  
SgPg vs SgPg —  
SgPg vs SgFn —  
SgPgFn vs SgPg —

Summary Table SgFn vs Sg SgPg vs Sg SgPgFn vs Sg SgPg v SgFn SgPgFn v SgFn SgPgFn vs SgPg Coverage

| Protein                                                               | SgFn vs Sg    |        |        |        | SgPg vs Sg    |        |        |        | SgPgFn vs Sg  |        |        |        | SgPg v SgFn   |        |        |        | SgPgFn v SgFn |        |        |        | SgPgFn vs SgPg |        |        |        | Log <sub>2</sub> Ratios |     |       |       |    |    |    |   |   |   |   |  |
|-----------------------------------------------------------------------|---------------|--------|--------|--------|---------------|--------|--------|--------|---------------|--------|--------|--------|---------------|--------|--------|--------|---------------|--------|--------|--------|----------------|--------|--------|--------|-------------------------|-----|-------|-------|----|----|----|---|---|---|---|--|
|                                                                       | Ratio         | Sum    | q-Val  | p-Val  | Ratio         | Sum    | q-Val  | p-Val  | Ratio         | Sum    | q-Val  | p-Val  | Ratio         | Sum    | q-Val  | p-Val  | Ratio         | Sum    | q-Val  | p-Val  | Ratio          | Sum    | q-Val  | p-Val  | Ratio                   | Sum | q-Val | p-Val | -6 | -4 | -2 | 0 | 2 | 4 | 6 |  |
| <b>SGO_1315</b><br>trmD; tRNA (guanine-N1)-methyltransferase          | 1.317         | 3.611  |        |        | 0.030         | 3.428  | 0.1661 | 0.8725 |               | 1.807  |        |        | -1.287        | 3.485  | 0.0152 | 0.0809 |               | 2.000  |        |        |                | 2.348  |        |        |                         |     |       |       |    |    |    |   |   |   |   |  |
| <b>SGO_1316</b><br>16S rRNA processing protein RimM                   | -0.094        | 4.561  | 0.0829 | 0.5220 | 0.266         | 4.747  | 0.0494 | 0.2206 |               | 3.619  |        |        | 0.360         | 4.180  | 0.0050 | 0.0190 |               | 2.376  |        |        |                | 3.351  |        |        |                         |     |       |       |    |    |    |   |   |   |   |  |
| <b>SGO_1323</b><br>rpsP; ribosomal protein S16                        | -0.001        | 7.305  | 0.1420 | 0.9590 | <b>0.691</b>  | 7.691  | 0.0033 | 0.0082 | <b>1.424</b>  | 8.182  | 0.0002 | 0.0003 | <b>0.692</b>  | 7.175  | 0.0021 | 0.0051 | <b>1.425</b>  | 7.057  | 0.0003 | 0.0002 | <b>0.733</b>   | 7.891  | 0.0043 | 0.0012 |                         |     |       |       |    |    |    |   |   |   |   |  |
| <b>SGO_1324</b><br>hypothetical protein SGO_1324                      |               | 5.595  |        |        |               | 5.595  |        |        |               | 5.595  |        |        |               |        |        |        |               |        |        |        |                |        |        |        |                         |     |       |       |    |    |    |   |   |   |   |  |
| <b>SGO_1327</b><br>HAD-superfamily subfamily IIA hydrolase, TIGR01457 | -0.272        | 5.984  | 0.0425 | 0.2370 | 0.123         | 6.174  | 0.1330 | 0.6792 | -0.794        | 5.775  | 0.0079 | 0.0463 | <b>0.395</b>  | 5.518  | 0.0009 | 0.0015 | <b>-0.522</b> | 4.460  | 0.0011 | 0.0014 | <b>-0.917</b>  | 5.317  | 0.0026 | 0.0005 |                         |     |       |       |    |    |    |   |   |   |   |  |
| <b>SGO_1328</b><br>hypothetical protein SGO_1328                      |               | 1.585  |        |        |               | 1.585  |        |        |               | 1.585  |        |        |               |        |        |        |               |        |        |        |                |        |        |        |                         |     |       |       |    |    |    |   |   |   |   |  |
| <b>SGO_1330</b><br>transporter                                        |               | 3.772  |        |        |               | 3.772  |        |        |               | 3.772  |        |        |               |        |        |        |               |        |        |        |                |        |        |        |                         |     |       |       |    |    |    |   |   |   |   |  |
| <b>SGO_1331</b><br>HlyB/MsbA family ABC transporter                   |               | 1.807  |        |        |               | 1.807  |        |        |               | 1.807  |        |        |               |        |        |        |               |        |        |        |                |        |        |        |                         |     |       |       |    |    |    |   |   |   |   |  |
| <b>SGO_1336</b><br>pcrA; ATP-dependent DNA helicase PcrA              | 0.376         | 6.355  | 0.0261 | 0.1308 | 0.050         | 6.164  | 0.0802 | 0.3879 | <b>-0.743</b> | 5.818  | 0.0010 | 0.0032 | -0.326        | 5.865  | 0.0282 | 0.1730 | -1.119        | 4.961  | 0.0062 | 0.0218 | -0.793         | 5.338  | 0.0073 | 0.0051 |                         |     |       |       |    |    |    |   |   |   |   |  |
| <b>SGO_1337</b><br>cation efflux family protein                       |               | 1.585  |        |        |               | 1.585  |        |        |               | 1.585  |        |        |               |        |        |        |               |        |        |        |                |        |        |        |                         |     |       |       |    |    |    |   |   |   |   |  |
| <b>SGO_1338</b><br>Signal peptidase I                                 | -0.729        | 6.239  | 0.0050 | 0.0161 | -3.036        | 5.648  | 0.0253 | 0.1018 |               | 5.564  |        |        | <b>-2.307</b> | 4.446  | 0.0012 | 0.0024 |               | 3.696  |        |        |                | 1.000  |        |        |                         |     |       |       |    |    |    |   |   |   |   |  |
| <b>SGO_1339</b><br>pyk; pyruvate kinase                               | <b>0.635</b>  | 11.550 | 0.0014 | 0.0030 | <b>1.066</b>  | 11.826 | 0.0001 | 0.0001 | <b>0.963</b>  | 11.757 | 0.0003 | 0.0003 | <b>0.431</b>  | 11.551 | 0.0019 | 0.0043 | <b>0.328</b>  | 10.883 | 0.0048 | 0.0154 | -0.104         | 11.699 | 0.0426 | 0.0899 |                         |     |       |       |    |    |    |   |   |   |   |  |
| <b>SGO_1340</b><br>Phosphofructokinase                                | <b>1.240</b>  | 10.517 | 0.0002 | 0.0001 | <b>0.758</b>  | 10.195 | 0.0001 | 0.0000 | <b>0.630</b>  | 10.116 | 0.0002 | 0.0003 | <b>-0.483</b> | 10.273 | 0.0008 | 0.0011 | <b>-0.610</b> | 9.611  | 0.0008 | 0.0008 | -0.128         | 9.949  | 0.0114 | 0.0111 |                         |     |       |       |    |    |    |   |   |   |   |  |
| <b>SGO_1341</b><br>dnaE; DNA-directed DNA polymerase III alpha chain  | 0.393         | 5.498  | 0.0437 | 0.2450 | -1.076        | 4.546  | 0.0154 | 0.0566 |               | 4.239  |        |        | -1.469        | 4.431  | 0.0448 | 0.3009 |               | 3.594  |        |        |                | 1.648  |        |        |                         |     |       |       |    |    |    |   |   |   |   |  |
| <b>SGO_1342</b><br>ABC transporter, ATP-binding protein SP1715        | <b>-0.526</b> | 10.529 | 0.0026 | 0.0071 | <b>-1.281</b> | 10.262 | 0.0001 | 0.0001 | <b>-1.216</b> | 10.281 | 0.0001 | 0.0000 | <b>-0.755</b> | 9.403  | 0.0030 | 0.0092 | <b>-0.690</b> | 8.816  | 0.0033 | 0.0095 | 0.066          | 9.004  | 0.1095 | 0.3209 |                         |     |       |       |    |    |    |   |   |   |   |  |
| <b>SGO_1343</b><br>ABC transporter, ATP-binding protein SP1715        |               | 5.350  |        |        | -1.773        | 5.547  | 0.0085 | 0.0271 |               | 5.350  |        |        |               | 2.063  |        |        |               |        |        |        |                | 2.063  |        |        |                         |     |       |       |    |    |    |   |   |   |   |  |

Show detected proteins only  
 Show all proteins

Proteins found:  
1179

Dot Plots  
Dot Plots

Test

Cutoff

q-Value

p-Value

.005

| Signif | Direction | Applies To   |
|--------|-----------|--------------|
| yes    | +         | ratios, bars |
| no     | n/a       | bars         |
| yes    | -         | ratios, bars |
| yes    | +         | p-, q-Values |
| yes    | -         | p-, q-Values |

SgFn vs Sg —  
SgPgFn vs Sg —  
SgPgFn vs SgFn —

— SgPg vs Sg  
— SgPg vs SgFn  
— SgPgFn vs SgPg

Summary Table SgFn vs Sg SgPg vs Sg SgPgFn vs Sg SgPg v SgFn SgPgFn v SgFn SgPgFn vs SgPg Coverage

| Protein                                             | SgFn vs Sg |       |        |        | SgPg vs Sg |       |        |        | SgPgFn vs Sg |       |        |        | SgPg v SgFn |       |        |        | SgPgFn v SgFn |       |        |        | SgPgFn vs SgPg |       |        |        | Log <sub>2</sub> Ratios |     |       |       |    |    |    |   |   |   |   |  |
|-----------------------------------------------------|------------|-------|--------|--------|------------|-------|--------|--------|--------------|-------|--------|--------|-------------|-------|--------|--------|---------------|-------|--------|--------|----------------|-------|--------|--------|-------------------------|-----|-------|-------|----|----|----|---|---|---|---|--|
|                                                     | Ratio      | Sum   | q-Val  | p-Val  | Ratio      | Sum   | q-Val  | p-Val  | Ratio        | Sum   | q-Val  | p-Val  | Ratio       | Sum   | q-Val  | p-Val  | Ratio         | Sum   | q-Val  | p-Val  | Ratio          | Sum   | q-Val  | p-Val  | Ratio                   | Sum | q-Val | p-Val | -6 | -4 | -2 | 0 | 2 | 4 | 6 |  |
| SGO_1347                                            | -3.010     | 6.238 | 0.0236 | 0.1122 |            | 6.152 |        |        |              | 6.152 |        |        |             | 1.611 |        |        |               | 1.000 |        |        |                |       |        |        |                         |     |       |       |    |    |    |   |   |   |   |  |
| membrane associated lipoprotein                     |            |       |        |        |            |       |        |        |              |       |        |        |             |       |        |        |               |       |        |        |                |       |        |        |                         |     |       |       |    |    |    |   |   |   |   |  |
| SGO_1355                                            | 0.352      | 4.188 | 0.0603 | 0.3566 |            | 3.483 |        |        |              | 3.483 |        |        |             | 2.302 |        |        |               | 1.692 |        |        |                |       |        |        |                         |     |       |       |    |    |    |   |   |   |   |  |
| lipoprotein, putative                               |            |       |        |        |            |       |        |        |              |       |        |        |             |       |        |        |               |       |        |        |                |       |        |        |                         |     |       |       |    |    |    |   |   |   |   |  |
| SGO_1360                                            |            | 2.832 |        |        |            | 2.832 |        |        |              | 2.832 |        |        |             |       |        |        |               |       |        |        |                |       |        |        |                         |     |       |       |    |    |    |   |   |   |   |  |
| ABC transporter domain protein                      |            |       |        |        |            |       |        |        |              |       |        |        |             |       |        |        |               |       |        |        |                |       |        |        |                         |     |       |       |    |    |    |   |   |   |   |  |
| SGO_1361                                            | -0.470     | 3.485 |        |        |            | 2.700 |        |        |              | 2.700 |        |        |             | 1.717 |        |        |               | 1.107 |        |        |                |       |        |        |                         |     |       |       |    |    |    |   |   |   |   |  |
| ADP-ribosylhydrolase                                |            |       |        |        |            |       |        |        |              |       |        |        |             |       |        |        |               |       |        |        |                |       |        |        |                         |     |       |       |    |    |    |   |   |   |   |  |
| SGO_1364                                            | -0.705     | 6.491 | 0.0080 | 0.0301 | -0.053     | 6.770 | 0.1267 | 0.6436 | -2.201       | 5.952 | 0.0174 | 0.1299 | 0.652       | 5.934 | 0.0013 | 0.0028 | -1.496        | 4.199 | 0.0205 | 0.1008 | -2.148         | 5.375 | 0.0143 | 0.0158 |                         |     |       |       |    |    |    |   |   |   |   |  |
| rumA-2; 23S rRNA (uracil-5-)-methyltransferase RumA |            |       |        |        |            |       |        |        |              |       |        |        |             |       |        |        |               |       |        |        |                |       |        |        |                         |     |       |       |    |    |    |   |   |   |   |  |
| SGO_1365                                            | -0.327     | 6.965 | 0.0064 | 0.0221 | -3.071     | 6.289 | 0.0001 | 0.0001 | -2.531       | 6.236 | 0.0012 | 0.0040 | -2.745      | 5.496 | 0.0007 | 0.0010 | -2.204        | 4.820 | 0.0169 | 0.0791 | 0.541          | 3.376 | 0.1526 | 0.4924 |                         |     |       |       |    |    |    |   |   |   |   |  |
| transcription regulator yrFE                        |            |       |        |        |            |       |        |        |              |       |        |        |             |       |        |        |               |       |        |        |                |       |        |        |                         |     |       |       |    |    |    |   |   |   |   |  |
| SGO_1366                                            |            |       |        |        |            | 3.719 |        |        |              |       |        |        |             | 3.205 |        |        |               |       |        |        |                | 3.205 |        |        |                         |     |       |       |    |    |    |   |   |   |   |  |
| pheA; prephenate dehydratase                        |            |       |        |        |            |       |        |        |              |       |        |        |             |       |        |        |               |       |        |        |                |       |        |        |                         |     |       |       |    |    |    |   |   |   |   |  |
| SGO_1367                                            | 1.206      | 5.508 | 0.0015 | 0.0034 | -0.645     | 4.492 | 0.0027 | 0.0065 |              | 3.781 |        |        | -1.851      | 4.827 | 0.0009 | 0.0014 |               | 3.866 |        |        |                | 2.617 |        |        |                         |     |       |       |    |    |    |   |   |   |   |  |
| aroK; shikimate kinase                              |            |       |        |        |            |       |        |        |              |       |        |        |             |       |        |        |               |       |        |        |                |       |        |        |                         |     |       |       |    |    |    |   |   |   |   |  |
| SGO_1368                                            | 2.491      | 5.517 | 0.0015 | 0.0034 | 1.405      | 4.704 | 0.0175 | 0.0655 |              | 3.098 |        |        | -1.086      | 5.261 | 0.0005 | 0.0005 |               | 4.094 |        |        |                | 3.617 |        |        |                         |     |       |       |    |    |    |   |   |   |   |  |
| aroA; 3-phosphoshikimate 1-carboxyvinyltransferase  |            |       |        |        |            |       |        |        |              |       |        |        |             |       |        |        |               |       |        |        |                |       |        |        |                         |     |       |       |    |    |    |   |   |   |   |  |
| SGO_1369                                            | 3.346      | 8.392 | 0.0001 | 0.0000 | -0.018     | 5.905 | 0.1710 | 0.9038 | -0.928       | 5.247 | 0.0072 | 0.0414 | -3.364      | 7.878 | 0.0001 | 0.0000 | -4.275        | 7.170 | 0.0063 | 0.0223 | -0.910         | 4.724 | 0.0565 | 0.1337 |                         |     |       |       |    |    |    |   |   |   |   |  |
| L-2-hydroxyisocaproate dehydrogenase                |            |       |        |        |            |       |        |        |              |       |        |        |             |       |        |        |               |       |        |        |                |       |        |        |                         |     |       |       |    |    |    |   |   |   |   |  |
| SGO_1370                                            | 1.319      | 6.800 | 0.0022 | 0.0058 | 1.245      | 6.740 | 0.0010 | 0.0015 | 1.637        | 7.025 | 0.0003 | 0.0004 | -0.075      | 6.763 | 0.0826 | 0.6023 | 0.318         | 6.355 | 0.0193 | 0.0935 | 0.392          | 6.928 | 0.0178 | 0.0228 |                         |     |       |       |    |    |    |   |   |   |   |  |
| Protein of unknown function (DUF964) superfamily    |            |       |        |        |            |       |        |        |              |       |        |        |             |       |        |        |               |       |        |        |                |       |        |        |                         |     |       |       |    |    |    |   |   |   |   |  |
| SGO_1372                                            | 0.153      | 4.305 | 0.0774 | 0.4805 | 1.553      | 5.640 | 0.0003 | 0.0002 | 0.923        | 4.628 | 0.0109 | 0.0717 | 1.399       | 4.953 | 0.0083 | 0.0379 | 0.770         | 3.127 |        |        | -0.629         | 5.106 | 0.0352 | 0.0663 |                         |     |       |       |    |    |    |   |   |   |   |  |
| aroC; chorismate synthase                           |            |       |        |        |            |       |        |        |              |       |        |        |             |       |        |        |               |       |        |        |                |       |        |        |                         |     |       |       |    |    |    |   |   |   |   |  |
| SGO_1373                                            | 0.481      | 4.716 | 0.0699 | 0.4266 | 0.379      | 5.146 | 0.0473 | 0.2080 | 0.062        | 4.562 | 0.1026 | 0.9899 | -0.102      | 4.405 | 0.0224 | 0.1302 | -0.419        | 3.082 |        |        | -0.318         | 4.272 | 0.0284 | 0.0487 |                         |     |       |       |    |    |    |   |   |   |   |  |
| aroB; 3-dehydroquinate synthase                     |            |       |        |        |            |       |        |        |              |       |        |        |             |       |        |        |               |       |        |        |                |       |        |        |                         |     |       |       |    |    |    |   |   |   |   |  |
| SGO_1374                                            |            | 3.196 |        |        | 0.232      | 4.333 | 0.0655 | 0.3054 |              | 3.196 |        |        |             | 2.945 |        |        |               | 2.945 |        |        |                |       |        |        |                         |     |       |       |    |    |    |   |   |   |   |  |
| aroE; shikimate 5-dehydrogenase                     |            |       |        |        |            |       |        |        |              |       |        |        |             |       |        |        |               |       |        |        |                |       |        |        |                         |     |       |       |    |    |    |   |   |   |   |  |
| SGO_1375                                            | -0.075     | 5.682 | 0.0821 | 0.5164 | 0.563      | 6.044 | 0.0214 | 0.0838 | 0.006        | 5.308 | 0.1015 | 0.9771 | 0.638       | 5.497 | 0.0111 | 0.0536 | 0.081         | 4.126 | 0.0571 | 0.3649 | -0.556         | 5.207 | 0.1164 | 0.3516 |                         |     |       |       |    |    |    |   |   |   |   |  |
| aroD; 3-dehydroquinate dehydratase, type I          |            |       |        |        |            |       |        |        |              |       |        |        |             |       |        |        |               |       |        |        |                |       |        |        |                         |     |       |       |    |    |    |   |   |   |   |  |
| SGO_1376                                            |            | 3.982 |        |        |            | 3.982 |        |        |              | 3.982 |        |        |             |       |        |        |               |       |        |        |                |       |        |        |                         |     |       |       |    |    |    |   |   |   |   |  |
| Methyltransferase                                   |            |       |        |        |            |       |        |        |              |       |        |        |             |       |        |        |               |       |        |        |                |       |        |        |                         |     |       |       |    |    |    |   |   |   |   |  |

Show detected proteins only  
 Show all proteins

Proteins found:  
1179

Dot Plots  
Dot Plots

Test Cutoff

q-Value

p-Value

.005

| Signif | Direction | Applies To   |
|--------|-----------|--------------|
| yes    | +         | ratios, bars |
| no     | n/a       | bars         |
| yes    | -         | ratios, bars |
| yes    | +         | p-, q-Values |
| yes    | -         | p-, q-Values |

SgFn vs Sg — — SgPg vs Sg  
SgPgFn vs Sg — — SgPg vs SgFn  
SgPgFn vs SgFn — — SgPgFn vs SgPg



Summary Table SgFn vs Sg SgPg vs Sg SgPgFn vs Sg SgPg v SgFn SgPgFn v SgFn SgPgFn vs SgPg Coverage

| Protein                                                                       | SgFn vs Sg |       |        |        | SgPg vs Sg |       |        |        | SgPgFn vs Sg |       |        |        | SgPg v SgFn |       |        |        | SgPgFn v SgFn |       |        |        | SgPgFn vs SgPg |       |        |        | Log <sub>2</sub> Ratios |     |       |       |    |    |    |   |   |   |   |  |
|-------------------------------------------------------------------------------|------------|-------|--------|--------|------------|-------|--------|--------|--------------|-------|--------|--------|-------------|-------|--------|--------|---------------|-------|--------|--------|----------------|-------|--------|--------|-------------------------|-----|-------|-------|----|----|----|---|---|---|---|--|
|                                                                               | Ratio      | Sum   | q-Val  | p-Val  | Ratio      | Sum   | q-Val  | p-Val  | Ratio        | Sum   | q-Val  | p-Val  | Ratio       | Sum   | q-Val  | p-Val  | Ratio         | Sum   | q-Val  | p-Val  | Ratio          | Sum   | q-Val  | p-Val  | Ratio                   | Sum | q-Val | p-Val | -6 | -4 | -2 | 0 | 2 | 4 | 6 |  |
| SGO_1377                                                                      | -1.512     | 8.293 | 0.0003 | 0.0003 | -2.205     | 8.142 | 0.0003 | 0.0002 | -3.781       | 7.966 | 0.0002 | 0.0001 | -0.693      | 6.527 | 0.0002 | 0.0001 | -2.269        | 5.508 | 0.0005 | 0.0004 | -1.576         | 5.577 | 0.0051 | 0.0025 |                         |     |       |       |    |    |    |   |   |   |   |  |
| sulfatase                                                                     |            |       |        |        |            |       |        |        |              |       |        |        |             |       |        |        |               |       |        |        |                |       |        |        |                         |     |       |       |    |    |    |   |   |   |   |  |
| SGO_1381                                                                      | 0.018      | 6.733 | 0.1240 | 0.8153 | -0.506     | 6.495 | 0.0150 | 0.0546 | -0.907       | 6.330 | 0.0003 | 0.0006 | -0.525      | 6.005 | 0.0188 | 0.1061 | -0.925        | 5.231 | 0.0052 | 0.0172 | -0.400         | 5.525 | 0.0533 | 0.1243 |                         |     |       |       |    |    |    |   |   |   |   |  |
| csn1; CRISPR-associated protein, Csn1 family                                  |            |       |        |        |            |       |        |        |              |       |        |        |             |       |        |        |               |       |        |        |                |       |        |        |                         |     |       |       |    |    |    |   |   |   |   |  |
| SGO_1383                                                                      | 0.097      | 8.709 | 0.0639 | 0.3823 | 0.692      | 9.044 | 0.0016 | 0.0032 | 0.813        | 9.118 | 0.0003 | 0.0004 | 0.595       | 8.571 | 0.0030 | 0.0093 | 0.716         | 8.032 | 0.0013 | 0.0023 | 0.121          | 8.897 | 0.0576 | 0.1374 |                         |     |       |       |    |    |    |   |   |   |   |  |
| rplS; ribosomal protein L19                                                   |            |       |        |        |            |       |        |        |              |       |        |        |             |       |        |        |               |       |        |        |                |       |        |        |                         |     |       |       |    |    |    |   |   |   |   |  |
| SGO_1386                                                                      | 3.748      | 6.408 | 0.0246 | 0.1188 | 1.156      | 4.082 | 0.0635 | 0.2939 |              | 1.585 |        |        | -2.592      | 6.069 | 0.0018 | 0.0042 |               | 5.232 |        |        |                | 3.288 |        |        |                         |     |       |       |    |    |    |   |   |   |   |  |
| chorismate mutase                                                             |            |       |        |        |            |       |        |        |              |       |        |        |             |       |        |        |               |       |        |        |                |       |        |        |                         |     |       |       |    |    |    |   |   |   |   |  |
| SGO_1388                                                                      | -0.919     | 5.475 | 0.0302 | 0.1570 |            | 4.827 |        |        |              | 4.827 |        |        |             | 3.495 |        |        |               | 2.884 |        |        |                |       |        |        |                         |     |       |       |    |    |    |   |   |   |   |  |
| pulA-1; pullulanase, type I                                                   |            |       |        |        |            |       |        |        |              |       |        |        |             |       |        |        |               |       |        |        |                |       |        |        |                         |     |       |       |    |    |    |   |   |   |   |  |
| SGO_1389                                                                      | -0.596     | 6.153 | 0.0095 | 0.0368 |            | 5.417 |        |        |              | 5.417 |        |        |             | 4.315 |        |        |               | 3.705 |        |        |                |       |        |        |                         |     |       |       |    |    |    |   |   |   |   |  |
| conserved hypothetical protein TIGR00147                                      |            |       |        |        |            |       |        |        |              |       |        |        |             |       |        |        |               |       |        |        |                |       |        |        |                         |     |       |       |    |    |    |   |   |   |   |  |
| SGO_1390                                                                      | -0.644     | 6.055 | 0.0041 | 0.0125 | -0.884     | 5.960 | 0.0007 | 0.0009 | -0.819       | 5.995 | 0.0031 | 0.0140 | -0.240      | 5.074 | 0.0349 | 0.2218 | -0.176        | 4.509 | 0.0817 | 0.5555 | 0.065          | 4.991 | 0.1897 | 0.6735 |                         |     |       |       |    |    |    |   |   |   |   |  |
| ligA; DNA ligase, NAD-dependent                                               |            |       |        |        |            |       |        |        |              |       |        |        |             |       |        |        |               |       |        |        |                |       |        |        |                         |     |       |       |    |    |    |   |   |   |   |  |
| SGO_1394                                                                      |            | 3.124 |        |        |            | 4.059 |        |        |              |       |        |        | -0.126      | 4.153 | 0.1186 | 0.8978 |               | 2.000 |        |        |                | 3.546 |        |        |                         |     |       |       |    |    |    |   |   |   |   |  |
| hypothetical protein SGO_1394                                                 |            |       |        |        |            |       |        |        |              |       |        |        |             |       |        |        |               |       |        |        |                |       |        |        |                         |     |       |       |    |    |    |   |   |   |   |  |
| SGO_1397                                                                      | 0.483      | 6.995 | 0.0216 | 0.1016 | 0.382      | 6.937 | 0.0390 | 0.1674 | -0.134       | 6.668 | 0.0535 | 0.4738 | -0.101      | 6.641 | 0.0692 | 0.4893 | -0.617        | 5.803 | 0.0048 | 0.0153 | -0.516         | 6.352 | 0.0165 | 0.0202 |                         |     |       |       |    |    |    |   |   |   |   |  |
| map; methionine aminopeptidase, type I                                        |            |       |        |        |            |       |        |        |              |       |        |        |             |       |        |        |               |       |        |        |                |       |        |        |                         |     |       |       |    |    |    |   |   |   |   |  |
| SGO_1398                                                                      | -1.383     | 5.608 | 0.0018 | 0.0044 | -1.419     | 5.593 | 0.0015 | 0.0030 |              | 5.134 |        |        | -0.036      | 4.232 | 0.1077 | 0.8090 |               | 2.648 |        |        |                | 3.205 |        |        |                         |     |       |       |    |    |    |   |   |   |   |  |
| hypothetical protein SGO_1398                                                 |            |       |        |        |            |       |        |        |              |       |        |        |             |       |        |        |               |       |        |        |                |       |        |        |                         |     |       |       |    |    |    |   |   |   |   |  |
| SGO_1400                                                                      | -0.055     | 6.325 | 0.1011 | 0.6549 | -0.556     | 6.098 | 0.0023 | 0.0052 | -1.006       | 5.997 | 0.0111 | 0.0740 | -0.501      | 5.556 | 0.0058 | 0.0230 | -0.951        | 4.842 | 0.0202 | 0.0980 | -0.450         | 5.155 | 0.1586 | 0.5277 |                         |     |       |       |    |    |    |   |   |   |   |  |
| murA-2; UDP-N-acetylglucosamine 1-carboxyvinyltransferase                     |            |       |        |        |            |       |        |        |              |       |        |        |             |       |        |        |               |       |        |        |                |       |        |        |                         |     |       |       |    |    |    |   |   |   |   |  |
| SGO_1405                                                                      |            |       |        |        |            | 1.835 |        |        |              |       |        |        |             | 1.322 |        |        |               |       |        |        |                | 1.322 |        |        |                         |     |       |       |    |    |    |   |   |   |   |  |
| hisA; phosphoribosylformimino-5-aminoimidazole carboxamide ribotide isomerase |            |       |        |        |            |       |        |        |              |       |        |        |             |       |        |        |               |       |        |        |                |       |        |        |                         |     |       |       |    |    |    |   |   |   |   |  |
| SGO_1413                                                                      | 0.215      | 5.654 | 0.0954 | 0.6144 | -0.695     | 5.167 | 0.0323 | 0.1348 |              | 4.510 |        |        | -0.910      | 4.834 | 0.0232 | 0.1353 |               | 3.661 |        |        |                | 3.202 |        |        |                         |     |       |       |    |    |    |   |   |   |   |  |
| first chain of major exonuclease RexA                                         |            |       |        |        |            |       |        |        |              |       |        |        |             |       |        |        |               |       |        |        |                |       |        |        |                         |     |       |       |    |    |    |   |   |   |   |  |
| SGO_1414                                                                      | 1.306      | 5.724 | 0.0082 | 0.0306 | -0.773     | 4.582 | 0.0176 | 0.0664 | 0.673        | 5.281 | 0.0084 | 0.0507 | -2.079      | 5.022 | 0.0038 | 0.0129 | -0.633        | 4.814 | 0.0183 | 0.0876 | 1.446          | 4.504 | 0.0057 | 0.0031 |                         |     |       |       |    |    |    |   |   |   |   |  |
| rexB; putative exonuclease RexB                                               |            |       |        |        |            |       |        |        |              |       |        |        |             |       |        |        |               |       |        |        |                |       |        |        |                         |     |       |       |    |    |    |   |   |   |   |  |
| SGO_1415                                                                      |            | 2.481 |        |        |            | 2.481 |        |        |              | 2.481 |        |        |             |       |        |        |               |       |        |        |                |       |        |        |                         |     |       |       |    |    |    |   |   |   |   |  |
| LPXTG cell wall surface protein, X-prolyl dipeptidylaminopeptidase, putative  |            |       |        |        |            |       |        |        |              |       |        |        |             |       |        |        |               |       |        |        |                |       |        |        |                         |     |       |       |    |    |    |   |   |   |   |  |
| SGO_1416                                                                      |            | 1.585 |        |        |            | 1.585 |        |        |              | 1.585 |        |        |             |       |        |        |               |       |        |        |                |       |        |        |                         |     |       |       |    |    |    |   |   |   |   |  |
| putative histidine kinase                                                     |            |       |        |        |            |       |        |        |              |       |        |        |             |       |        |        |               |       |        |        |                |       |        |        |                         |     |       |       |    |    |    |   |   |   |   |  |

Show detected proteins only  
 Show all proteins  
 Filter by category:

Proteins found: 1179

[Dot Plots](#)

[Dot Plots](#)

**Test**      **Cutoff**

| Signif | Direction | Applies To   |
|--------|-----------|--------------|
| yes    | +         | ratios, bars |
| no     | n/a       | bars         |
| yes    | -         | ratios, bars |
| yes    | +         | p-, q-Values |
| yes    | -         | p-, q-Values |

SgFn vs Sg — █ — SgPg vs Sg

SgPgFn vs Sg — █ — SgPg vs SgFn

SgPgFn vs SgFn — █ — SgPgFn vs SgPg

Summary Table SgFn vs Sg SgPg vs Sg SgPgFn vs Sg SgPg v SgFn SgPgFn v SgFn SgPgFn vs SgPg Coverage

| Protein         | SgFn vs Sg                                                                   |        |        |        | SgPg vs Sg |        |        |        | SgPgFn vs Sg |        |        |        | SgPg v SgFn |        |        |        | SgPgFn v SgFn |        |        |        | SgPgFn vs SgPg |        |        |        | Log <sub>2</sub> Ratios |     |       |       |    |    |    |   |   |   |   |  |  |  |
|-----------------|------------------------------------------------------------------------------|--------|--------|--------|------------|--------|--------|--------|--------------|--------|--------|--------|-------------|--------|--------|--------|---------------|--------|--------|--------|----------------|--------|--------|--------|-------------------------|-----|-------|-------|----|----|----|---|---|---|---|--|--|--|
|                 | Ratio                                                                        | Sum    | q-Val  | p-Val  | Ratio      | Sum    | q-Val  | p-Val  | Ratio        | Sum    | q-Val  | p-Val  | Ratio       | Sum    | q-Val  | p-Val  | Ratio         | Sum    | q-Val  | p-Val  | Ratio          | Sum    | q-Val  | p-Val  | Ratio                   | Sum | q-Val | p-Val | -6 | -4 | -2 | 0 | 2 | 4 | 6 |  |  |  |
| <b>SGO_1417</b> |                                                                              |        |        |        |            | 2.973  |        |        |              |        |        |        |             | 2.459  |        |        |               |        |        |        |                | 2.459  |        |        |                         |     |       |       |    |    |    |   |   |   |   |  |  |  |
|                 | response regulator protein                                                   |        |        |        |            |        |        |        |              |        |        |        |             |        |        |        |               |        |        |        |                |        |        |        |                         |     |       |       |    |    |    |   |   |   |   |  |  |  |
| <b>SGO_1422</b> | 1.421                                                                        | 7.816  | 0.0049 | 0.0157 | -0.278     | 6.778  | 0.0007 | 0.0009 | 0.474        | 7.184  | 0.0121 | 0.0817 | -1.700      | 7.234  | 0.0037 | 0.0120 | -0.947        | 6.844  | 0.0101 | 0.0413 | 0.752          | 6.562  | 0.0229 | 0.0351 |                         |     |       |       |    |    |    |   |   |   |   |  |  |  |
|                 | hypothetical protein SGO_1422                                                |        |        |        |            |        |        |        |              |        |        |        |             |        |        |        |               |        |        |        |                |        |        |        |                         |     |       |       |    |    |    |   |   |   |   |  |  |  |
| <b>SGO_1426</b> | 0.877                                                                        | 13.890 | 0.0009 | 0.0017 | 1.751      | 14.510 | 0.0001 | 0.0000 | 2.044        | 14.741 | 0.0001 | 0.0000 | 0.874       | 14.250 | 0.0003 | 0.0003 | 1.167         | 13.835 | 0.0002 | 0.0001 | 0.293          | 14.775 | 0.0037 | 0.0009 |                         |     |       |       |    |    |    |   |   |   |   |  |  |  |
|                 | eno; enolase                                                                 |        |        |        |            |        |        |        |              |        |        |        |             |        |        |        |               |        |        |        |                |        |        |        |                         |     |       |       |    |    |    |   |   |   |   |  |  |  |
| <b>SGO_1431</b> | -1.232                                                                       | 10.435 | 0.0057 | 0.0190 | -1.476     | 10.366 | 0.0048 | 0.0136 | -1.818       | 10.285 | 0.0024 | 0.0100 | -0.244      | 9.039  | 0.0119 | 0.0586 | -0.585        | 8.282  | 0.0028 | 0.0076 | -0.341         | 8.748  | 0.0026 | 0.0005 |                         |     |       |       |    |    |    |   |   |   |   |  |  |  |
|                 | EzrA; Septation ring formation regulator ezrA                                |        |        |        |            |        |        |        |              |        |        |        |             |        |        |        |               |        |        |        |                |        |        |        |                         |     |       |       |    |    |    |   |   |   |   |  |  |  |
| <b>SGO_1432</b> | -0.233                                                                       | 7.339  | 0.0479 | 0.2714 | 0.327      | 7.630  | 0.0534 | 0.2414 | -0.175       | 7.394  | 0.0706 | 0.6504 | 0.560       | 7.005  | 0.0084 | 0.0385 | 0.058         | 6.137  | 0.0965 | 0.6723 | -0.502         | 7.053  | 0.0667 | 0.1681 |                         |     |       |       |    |    |    |   |   |   |   |  |  |  |
|                 | gyrB; DNA gyrase, B subunit                                                  |        |        |        |            |        |        |        |              |        |        |        |             |        |        |        |               |        |        |        |                |        |        |        |                         |     |       |       |    |    |    |   |   |   |   |  |  |  |
| <b>SGO_1434</b> | 1.420                                                                        | 4.000  | 0.0260 | 0.1301 | 1.419      | 4.025  | 0.0515 | 0.2317 | 1.074        | 2.957  |        |        | -0.001      | 4.256  | 0.1190 | 0.9037 | -0.346        | 3.106  | 0.0544 | 0.3410 | -0.345         | 3.738  | 0.1566 | 0.5087 |                         |     |       |       |    |    |    |   |   |   |   |  |  |  |
|                 | thiJ; 4-methyl-5(beta-hydroxyethyl)-thiazole monophosphate synthesis protein |        |        |        |            |        |        |        |              |        |        |        |             |        |        |        |               |        |        |        |                |        |        |        |                         |     |       |       |    |    |    |   |   |   |   |  |  |  |
| <b>SGO_1437</b> |                                                                              | 3.669  |        |        |            | 3.669  |        |        |              | 3.669  |        |        |             |        |        |        |               |        |        |        |                |        |        |        |                         |     |       |       |    |    |    |   |   |   |   |  |  |  |
|                 | DnaQ family exonuclease/DinG family helicase, putative                       |        |        |        |            |        |        |        |              |        |        |        |             |        |        |        |               |        |        |        |                |        |        |        |                         |     |       |       |    |    |    |   |   |   |   |  |  |  |
| <b>SGO_1439</b> | -1.950                                                                       | 7.156  | 0.0001 | 0.0000 | -1.888     | 7.169  | 0.0001 | 0.0000 | -1.087       | 7.383  | 0.0003 | 0.0006 | 0.062       | 5.394  | 0.0593 | 0.4113 | 0.863         | 5.252  | 0.0027 | 0.0072 | 0.801          | 5.885  | 0.0103 | 0.0094 |                         |     |       |       |    |    |    |   |   |   |   |  |  |  |
|                 | ftsX; cell division protein FtsX                                             |        |        |        |            |        |        |        |              |        |        |        |             |        |        |        |               |        |        |        |                |        |        |        |                         |     |       |       |    |    |    |   |   |   |   |  |  |  |
| <b>SGO_1440</b> | -0.192                                                                       | 8.633  | 0.0018 | 0.0041 | -1.350     | 8.204  | 0.0001 | 0.0000 | -2.111       | 8.027  | 0.0001 | 0.0000 | -1.158      | 7.555  | 0.0000 | 0.0000 | -1.919        | 6.748  | 0.0000 | 0.0000 | -0.761         | 6.532  | 0.0017 | 0.0002 |                         |     |       |       |    |    |    |   |   |   |   |  |  |  |
|                 | cell-division ATP-binding protein FtsE                                       |        |        |        |            |        |        |        |              |        |        |        |             |        |        |        |               |        |        |        |                |        |        |        |                         |     |       |       |    |    |    |   |   |   |   |  |  |  |
| <b>SGO_1441</b> | 1.397                                                                        | 6.689  | 0.0036 | 0.0106 | 0.860      | 6.328  | 0.0120 | 0.0413 | 0.530        | 6.167  | 0.0258 | 0.2063 | -0.537      | 6.479  | 0.0212 | 0.1216 | -0.867        | 5.769  | 0.0186 | 0.0894 | -0.331         | 6.072  | 0.1586 | 0.5279 |                         |     |       |       |    |    |    |   |   |   |   |  |  |  |
|                 | prfB; peptide chain release factor 2                                         |        |        |        |            |        |        |        |              |        |        |        |             |        |        |        |               |        |        |        |                |        |        |        |                         |     |       |       |    |    |    |   |   |   |   |  |  |  |
| <b>SGO_1446</b> | 0.050                                                                        | 6.385  | 0.1420 | 0.9578 | 0.547      | 6.652  | 0.0188 | 0.0726 | -1.757       | 5.755  | 0.0038 | 0.0190 | 0.497       | 6.145  | 0.0048 | 0.0181 | -1.806        | 4.641  | 0.0016 | 0.0034 | -2.303         | 5.644  | 0.0026 | 0.0006 |                         |     |       |       |    |    |    |   |   |   |   |  |  |  |
|                 | murF; UDP-N-acetylmuramoyl-tripeptide--D-alanyl-D-alanine ligase             |        |        |        |            |        |        |        |              |        |        |        |             |        |        |        |               |        |        |        |                |        |        |        |                         |     |       |       |    |    |    |   |   |   |   |  |  |  |
| <b>SGO_1447</b> | 0.192                                                                        | 6.727  | 0.0003 | 0.0002 | 0.694      | 7.021  | 0.0026 | 0.0059 | -0.234       | 6.516  | 0.0002 | 0.0002 | 0.502       | 6.584  | 0.0037 | 0.0122 | -0.426        | 5.499  | 0.0000 | 0.0000 | -0.928         | 6.423  | 0.0057 | 0.0032 |                         |     |       |       |    |    |    |   |   |   |   |  |  |  |
|                 | ddlA; D-Ala-D-Ala ligase                                                     |        |        |        |            |        |        |        |              |        |        |        |             |        |        |        |               |        |        |        |                |        |        |        |                         |     |       |       |    |    |    |   |   |   |   |  |  |  |
| <b>SGO_1449</b> |                                                                              | 7.043  |        |        | -2.494     | 7.277  | 0.0006 | 0.0007 |              | 7.043  |        |        |             | 4.030  |        |        |               | 4.030  |        |        |                |        |        |        |                         |     |       |       |    |    |    |   |   |   |   |  |  |  |
|                 | pbp2b; penicillin-binding protein 2B                                         |        |        |        |            |        |        |        |              |        |        |        |             |        |        |        |               |        |        |        |                |        |        |        |                         |     |       |       |    |    |    |   |   |   |   |  |  |  |
| <b>SGO_1450</b> | 0.488                                                                        | 5.729  | 0.1066 | 0.6933 | 0.312      | 5.654  | 0.1740 | 0.9221 | -0.049       | 5.584  | 0.0945 | 0.9050 | -0.175      | 5.241  | 0.0703 | 0.4995 | -0.537        | 4.565  | 0.0809 | 0.5462 | -0.361         | 5.099  | 0.2139 | 0.7870 |                         |     |       |       |    |    |    |   |   |   |   |  |  |  |
|                 | hypothetical protein SGO_1450                                                |        |        |        |            |        |        |        |              |        |        |        |             |        |        |        |               |        |        |        |                |        |        |        |                         |     |       |       |    |    |    |   |   |   |   |  |  |  |
| <b>SGO_1451</b> | -0.022                                                                       | 6.949  | 0.1451 | 0.9850 | 0.844      | 7.426  | 0.0011 | 0.0018 | 1.596        | 7.952  | 0.0003 | 0.0004 | 0.866       | 6.911  | 0.0024 | 0.0066 | 1.618         | 6.827  | 0.0008 | 0.0008 | 0.752          | 7.695  | 0.0032 | 0.0008 |                         |     |       |       |    |    |    |   |   |   |   |  |  |  |
|                 | frr; ribosome recycling factor                                               |        |        |        |            |        |        |        |              |        |        |        |             |        |        |        |               |        |        |        |                |        |        |        |                         |     |       |       |    |    |    |   |   |   |   |  |  |  |
| <b>SGO_1452</b> | 0.222                                                                        | 6.908  | 0.0294 | 0.1514 | 1.012      | 7.403  | 0.0077 | 0.0237 | 0.769        | 7.227  | 0.0011 | 0.0036 | 0.790       | 6.962  | 0.0074 | 0.0313 | 0.547         | 6.184  | 0.0004 | 0.0002 | -0.243         | 7.184  | 0.0848 | 0.2275 |                         |     |       |       |    |    |    |   |   |   |   |  |  |  |
|                 | pyrH; uridylate kinase                                                       |        |        |        |            |        |        |        |              |        |        |        |             |        |        |        |               |        |        |        |                |        |        |        |                         |     |       |       |    |    |    |   |   |   |   |  |  |  |

Show detected proteins only  
 Show all proteins  
 Filter by category:

Proteins found:  
1179

Dot Plots  
Dot Plots

Test Cutoff

| Signif | Direction | Applies To   |
|--------|-----------|--------------|
| yes    | +         | ratios, bars |
| no     | n/a       | bars         |
| yes    | -         | ratios, bars |
| yes    | +         | p-, q-Values |
| yes    | -         | p-, q-Values |

SgFn vs Sg — — SgPg vs Sg  
SgPgFn vs Sg — — SgPg vs SgFn  
SgPgFn vs SgFn — — SgPgFn vs SgPg

|                                                    | Summary Table |       | SgFn vs Sg |        | SgPg vs Sg |       | SgPgFn vs Sg |        | SgPg v SgFn  |       | SgPgFn v SgFn |        | SgPgFn vs SgPg |       | Coverage |        |               |       |        |        |                |        |        |        |                         |     |       |       |       |     |       |       |    |    |    |   |   |   |   |  |  |  |  |  |  |  |  |  |
|----------------------------------------------------|---------------|-------|------------|--------|------------|-------|--------------|--------|--------------|-------|---------------|--------|----------------|-------|----------|--------|---------------|-------|--------|--------|----------------|--------|--------|--------|-------------------------|-----|-------|-------|-------|-----|-------|-------|----|----|----|---|---|---|---|--|--|--|--|--|--|--|--|--|
| Protein                                            | SgFn vs Sg    |       |            |        | SgPg vs Sg |       |              |        | SgPgFn vs Sg |       |               |        | SgPg v SgFn    |       |          |        | SgPgFn v SgFn |       |        |        | SgPgFn vs SgPg |        |        |        | Log <sub>2</sub> Ratios |     |       |       |       |     |       |       |    |    |    |   |   |   |   |  |  |  |  |  |  |  |  |  |
|                                                    | Ratio         | Sum   | q-Val      | p-Val  | Ratio      | Sum   | q-Val        | p-Val  | Ratio        | Sum   | q-Val         | p-Val  | Ratio          | Sum   | q-Val    | p-Val  | Ratio         | Sum   | q-Val  | p-Val  | Ratio          | Sum    | q-Val  | p-Val  | Ratio                   | Sum | q-Val | p-Val | Ratio | Sum | q-Val | p-Val | -6 | -4 | -2 | 0 | 2 | 4 | 6 |  |  |  |  |  |  |  |  |  |
| SGO_1453                                           |               | 2.231 |            |        |            | 4.100 |              |        |              | 5.420 |               |        | 1.869          | 3.936 |          |        | 2.151         | 4.446 | 0.0325 | 0.1818 | 0.282          | 5.393  | 0.1618 | 0.5445 |                         |     |       |       |       |     |       |       |    |    |    |   |   |   |   |  |  |  |  |  |  |  |  |  |
| glycosyl transferase, family 8 SP1766              |               |       |            |        |            |       |              |        |              |       |               |        |                |       |          |        |               |       |        |        |                |        |        |        |                         |     |       |       |       |     |       |       |    |    |    |   |   |   |   |  |  |  |  |  |  |  |  |  |
| SGO_1454                                           |               | 4.989 |            |        |            | 4.989 |              |        |              | 4.989 |               |        |                |       |          |        |               |       |        |        |                |        |        |        |                         |     |       |       |       |     |       |       |    |    |    |   |   |   |   |  |  |  |  |  |  |  |  |  |
| amino acid permease family protein                 |               |       |            |        |            |       |              |        |              |       |               |        |                |       |          |        |               |       |        |        |                |        |        |        |                         |     |       |       |       |     |       |       |    |    |    |   |   |   |   |  |  |  |  |  |  |  |  |  |
| SGO_1455                                           | 0.360         | 9.165 | 0.0027     | 0.0075 | 1.547      | 9.960 | 0.0027       | 0.0064 | 1.539        | 9.954 | 0.0016        | 0.0063 | 1.187          | 9.545 | 0.0031   | 0.0097 | 1.180         | 8.929 | 0.0033 | 0.0095 | -0.007         | 10.022 | 0.2492 | 0.9697 |                         |     |       |       |       |     |       |       |    |    |    |   |   |   |   |  |  |  |  |  |  |  |  |  |
| rplA; ribosomal protein L1                         |               |       |            |        |            |       |              |        |              |       |               |        |                |       |          |        |               |       |        |        |                |        |        |        |                         |     |       |       |       |     |       |       |    |    |    |   |   |   |   |  |  |  |  |  |  |  |  |  |
| SGO_1456                                           | -0.623        | 7.371 | 0.0080     | 0.0297 | 0.563      | 7.956 | 0.0124       | 0.0428 | 1.340        | 8.456 | 0.0002        | 0.0002 | 1.186          | 7.235 | 0.0044   | 0.0159 | 1.963         | 7.189 | 0.0006 | 0.0004 | 0.777          | 8.133  | 0.0094 | 0.0079 |                         |     |       |       |       |     |       |       |    |    |    |   |   |   |   |  |  |  |  |  |  |  |  |  |
| rplK; ribosomal protein L11                        |               |       |            |        |            |       |              |        |              |       |               |        |                |       |          |        |               |       |        |        |                |        |        |        |                         |     |       |       |       |     |       |       |    |    |    |   |   |   |   |  |  |  |  |  |  |  |  |  |
| SGO_1458                                           | -1.358        | 7.397 | 0.0062     | 0.0213 | -3.777     | 7.025 | 0.0025       | 0.0057 | -3.490       | 6.985 | 0.0199        | 0.1543 | -2.418         | 5.291 | 0.0023   | 0.0064 | -2.131        | 4.587 | 0.0298 | 0.1627 | 0.287          | 3.299  | 0.1503 | 0.4830 |                         |     |       |       |       |     |       |       |    |    |    |   |   |   |   |  |  |  |  |  |  |  |  |  |
| aha1; cation-transporting ATPase yfgQ              |               |       |            |        |            |       |              |        |              |       |               |        |                |       |          |        |               |       |        |        |                |        |        |        |                         |     |       |       |       |     |       |       |    |    |    |   |   |   |   |  |  |  |  |  |  |  |  |  |
| SGO_1459                                           |               | 5.269 |            |        |            | 1.161 |              |        |              |       |               |        | -3.101         | 4.837 | 0.0133   | 0.0686 |               | 4.145 |        |        |                | 0.648  |        |        |                         |     |       |       |       |     |       |       |    |    |    |   |   |   |   |  |  |  |  |  |  |  |  |  |
| glyoxylase family protein                          |               |       |            |        |            |       |              |        |              |       |               |        |                |       |          |        |               |       |        |        |                |        |        |        |                         |     |       |       |       |     |       |       |    |    |    |   |   |   |   |  |  |  |  |  |  |  |  |  |
| SGO_1460                                           | -2.935        | 6.888 | 0.0009     | 0.0018 | -1.693     | 7.097 | 0.0017       | 0.0034 | -2.301       | 6.850 | 0.0154        | 0.1116 | 1.242          | 5.000 | 0.0001   | 0.0000 | 0.634         | 3.467 | 0.0102 | 0.0427 | -0.608         | 4.901  | 0.0251 | 0.0404 |                         |     |       |       |       |     |       |       |    |    |    |   |   |   |   |  |  |  |  |  |  |  |  |  |
| DNA translocase ftsK                               |               |       |            |        |            |       |              |        |              |       |               |        |                |       |          |        |               |       |        |        |                |        |        |        |                         |     |       |       |       |     |       |       |    |    |    |   |   |   |   |  |  |  |  |  |  |  |  |  |
| SGO_1463                                           | -2.423        | 7.258 | 0.0002     | 0.0002 | -1.582     | 7.422 | 0.0003       | 0.0002 | -1.721       | 7.388 | 0.0001        | 0.0001 | 0.841          | 5.569 | 0.0059   | 0.0232 | 0.702         | 4.869 | 0.0085 | 0.0325 | -0.139         | 5.848  | 0.1013 | 0.2915 |                         |     |       |       |       |     |       |       |    |    |    |   |   |   |   |  |  |  |  |  |  |  |  |  |
| peptidyl-prolyl cis-trans isomerase                |               |       |            |        |            |       |              |        |              |       |               |        |                |       |          |        |               |       |        |        |                |        |        |        |                         |     |       |       |       |     |       |       |    |    |    |   |   |   |   |  |  |  |  |  |  |  |  |  |
| SGO_1464                                           |               | 7.031 |            |        | -1.171     | 7.558 | 0.0021       | 0.0045 | -1.964       | 7.359 | 0.0007        | 0.0020 |                | 5.336 |          |        |               | 3.939 |        |        | -0.793         | 5.996  | 0.0050 | 0.0018 |                         |     |       |       |       |     |       |       |    |    |    |   |   |   |   |  |  |  |  |  |  |  |  |  |
| uncharacterized probable metal-binding protein     |               |       |            |        |            |       |              |        |              |       |               |        |                |       |          |        |               |       |        |        |                |        |        |        |                         |     |       |       |       |     |       |       |    |    |    |   |   |   |   |  |  |  |  |  |  |  |  |  |
| SGO_1465                                           | -1.851        | 6.642 | 0.0016     | 0.0037 | 0.016      | 7.297 | 0.1771       | 0.9448 | -0.670       | 6.990 | 0.0048        | 0.0254 | 1.867          | 6.138 | 0.0013   | 0.0026 | 1.182         | 5.013 | 0.0011 | 0.0016 | -0.686         | 6.485  | 0.0158 | 0.0184 |                         |     |       |       |       |     |       |       |    |    |    |   |   |   |   |  |  |  |  |  |  |  |  |  |
| ABC transporter, ATP-binding protein SP0770        |               |       |            |        |            |       |              |        |              |       |               |        |                |       |          |        |               |       |        |        |                |        |        |        |                         |     |       |       |       |     |       |       |    |    |    |   |   |   |   |  |  |  |  |  |  |  |  |  |
| SGO_1466                                           | -0.133        | 5.958 | 0.0658     | 0.3968 | -0.616     | 5.754 | 0.0142       | 0.0510 |              | 5.034 |               |        | -0.483         | 5.149 | 0.0044   | 0.0157 |               | 3.755 |        |        |                | 3.893  |        |        |                         |     |       |       |       |     |       |       |    |    |    |   |   |   |   |  |  |  |  |  |  |  |  |  |
| MTA/SAH nucleosidase                               |               |       |            |        |            |       |              |        |              |       |               |        |                |       |          |        |               |       |        |        |                |        |        |        |                         |     |       |       |       |     |       |       |    |    |    |   |   |   |   |  |  |  |  |  |  |  |  |  |
| SGO_1468                                           |               | 1.585 |            |        |            | 1.585 |              |        |              | 1.585 |               |        |                |       |          |        |               |       |        |        |                |        |        |        |                         |     |       |       |       |     |       |       |    |    |    |   |   |   |   |  |  |  |  |  |  |  |  |  |
| MutT/nudix family protein                          |               |       |            |        |            |       |              |        |              |       |               |        |                |       |          |        |               |       |        |        |                |        |        |        |                         |     |       |       |       |     |       |       |    |    |    |   |   |   |   |  |  |  |  |  |  |  |  |  |
| SGO_1469                                           | -0.341        | 7.526 | 0.0005     | 0.0007 | 0.365      | 7.880 | 0.0011       | 0.0018 | 0.313        | 7.853 | 0.0043        | 0.0221 | 0.705          | 7.228 | 0.0004   | 0.0003 | 0.653         | 6.587 | 0.0017 | 0.0038 | -0.052         | 7.514  | 0.1588 | 0.5306 |                         |     |       |       |       |     |       |       |    |    |    |   |   |   |   |  |  |  |  |  |  |  |  |  |
| glmU; UDP-N-acetylglucosamine pyrophosphorylase    |               |       |            |        |            |       |              |        |              |       |               |        |                |       |          |        |               |       |        |        |                |        |        |        |                         |     |       |       |       |     |       |       |    |    |    |   |   |   |   |  |  |  |  |  |  |  |  |  |
| SGO_1472                                           | 1.625         | 4.942 | 0.0553     | 0.3203 | 0.998      | 4.385 | 0.0738       | 0.3513 | 0.170        | 3.088 |               |        | -0.627         | 4.934 | 0.0371   | 0.2402 | -1.454        | 3.841 | 0.0537 | 0.3353 | -0.828         | 3.906  | 0.1256 | 0.3862 |                         |     |       |       |       |     |       |       |    |    |    |   |   |   |   |  |  |  |  |  |  |  |  |  |
| acetyltransferase, GNAT family                     |               |       |            |        |            |       |              |        |              |       |               |        |                |       |          |        |               |       |        |        |                |        |        |        |                         |     |       |       |       |     |       |       |    |    |    |   |   |   |   |  |  |  |  |  |  |  |  |  |
| SGO_1475                                           |               | 4.513 |            |        |            | 4.513 |              |        |              | 4.513 |               |        |                |       |          |        |               |       |        |        |                |        |        |        |                         |     |       |       |       |     |       |       |    |    |    |   |   |   |   |  |  |  |  |  |  |  |  |  |
| lipoprotein, putative                              |               |       |            |        |            |       |              |        |              |       |               |        |                |       |          |        |               |       |        |        |                |        |        |        |                         |     |       |       |       |     |       |       |    |    |    |   |   |   |   |  |  |  |  |  |  |  |  |  |
| SGO_1483                                           |               | 1.643 |            |        |            | 1.643 |              |        |              | 1.643 |               |        |                |       |          |        |               |       |        |        |                |        |        |        |                         |     |       |       |       |     |       |       |    |    |    |   |   |   |   |  |  |  |  |  |  |  |  |  |
| ABC transporter, permease protein, probable SP0913 |               |       |            |        |            |       |              |        |              |       |               |        |                |       |          |        |               |       |        |        |                |        |        |        |                         |     |       |       |       |     |       |       |    |    |    |   |   |   |   |  |  |  |  |  |  |  |  |  |

Show detected proteins only  
 Show all proteins

Filter by category:

Proteins found:  
1179

Dot Plots

Test      Cutoff

    

| Signif | Direction | Applies To   |
|--------|-----------|--------------|
| yes    | +         | ratios, bars |
| no     | n/a       | bars         |
| yes    | -         | ratios, bars |
| yes    | +         | p-, q-Values |
| yes    | -         | p-, q-Values |

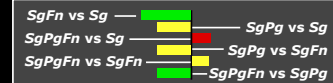

Summary Table SgFn vs Sg SgPg vs Sg SgPgFn vs Sg SgPg v SgFn SgPgFn v SgFn SgPgFn vs SgPg Coverage

| Protein                                                    | SgFn vs Sg |       |        |        | SgPg vs Sg |       |        |        | SgPgFn vs Sg |       |        |        | SgPg v SgFn |        |       |        | SgPgFn v SgFn |       |        |        | SgPgFn vs SgPg |        |       |        | Log <sub>2</sub> Ratios |     |       |       |    |    |    |   |   |   |   |  |  |
|------------------------------------------------------------|------------|-------|--------|--------|------------|-------|--------|--------|--------------|-------|--------|--------|-------------|--------|-------|--------|---------------|-------|--------|--------|----------------|--------|-------|--------|-------------------------|-----|-------|-------|----|----|----|---|---|---|---|--|--|
|                                                            | Ratio      | Sum   | q-Val  | p-Val  | Ratio      | Sum   | q-Val  | p-Val  | Ratio        | Sum   | q-Val  | p-Val  | Ratio       | Sum    | q-Val | p-Val  | Ratio         | Sum   | q-Val  | p-Val  | Ratio          | Sum    | q-Val | p-Val  | Ratio                   | Sum | q-Val | p-Val | -6 | -4 | -2 | 0 | 2 | 4 | 6 |  |  |
| SGO_1484                                                   |            |       |        |        |            | 3.135 |        |        |              |       |        |        |             | 2.622  |       |        |               |       |        |        |                | 2.622  |       |        |                         |     |       |       |    |    |    |   |   |   |   |  |  |
| ABC transporter, ATP-binding protein                       |            |       |        |        |            |       |        |        |              |       |        |        |             |        |       |        |               |       |        |        |                |        |       |        |                         |     |       |       |    |    |    |   |   |   |   |  |  |
| SGO_1486                                                   | 2.124      | 3.744 |        |        |            | 1.322 |        |        | 1.330        | 3.932 | 0.0225 | 0.1786 |             | 2.933  |       |        | -0.794        | 3.441 | 0.0286 | 0.1547 |                | 3.161  |       |        |                         |     |       |       |    |    |    |   |   |   |   |  |  |
| beta-galactosidase                                         |            |       |        |        |            |       |        |        |              |       |        |        |             |        |       |        |               |       |        |        |                |        |       |        |                         |     |       |       |    |    |    |   |   |   |   |  |  |
| SGO_1487                                                   | -0.501     | 7.346 | 0.0093 | 0.0359 | -3.730     | 6.626 | 0.0185 | 0.0708 |              | 6.572 |        |        |             | -3.229 | 5.637 | 0.0167 | 0.0923        |       | 4.952  |        |                |        | 1.322 |        |                         |     |       |       |    |    |    |   |   |   |   |  |  |
| LPXTG cell wall surface protein, Cna protein B-type domain |            |       |        |        |            |       |        |        |              |       |        |        |             |        |       |        |               |       |        |        |                |        |       |        |                         |     |       |       |    |    |    |   |   |   |   |  |  |
| SGO_1493                                                   | -1.485     | 7.194 | 0.0009 | 0.0015 | -2.649     | 6.864 | 0.0185 | 0.0704 |              | 6.754 |        |        |             | -1.164 | 5.045 | 0.0191 | 0.1084        |       | 4.145  |        |                |        | 2.585 |        |                         |     |       |       |    |    |    |   |   |   |   |  |  |
| hypothetical protein SGO_1493                              |            |       |        |        |            |       |        |        |              |       |        |        |             |        |       |        |               |       |        |        |                |        |       |        |                         |     |       |       |    |    |    |   |   |   |   |  |  |
| SGO_1495                                                   |            | 4.523 |        |        |            | 4.523 |        |        |              | 4.523 |        |        |             |        |       |        |               |       |        |        |                |        |       |        |                         |     |       |       |    |    |    |   |   |   |   |  |  |
| putative transcriptional regulator                         |            |       |        |        |            |       |        |        |              |       |        |        |             |        |       |        |               |       |        |        |                |        |       |        |                         |     |       |       |    |    |    |   |   |   |   |  |  |
| SGO_1498                                                   |            | 1.643 |        |        |            | 1.643 |        |        |              | 1.643 |        |        |             |        |       |        |               |       |        |        |                |        |       |        |                         |     |       |       |    |    |    |   |   |   |   |  |  |
| ABC transporter, permease protein, probable SP0913         |            |       |        |        |            |       |        |        |              |       |        |        |             |        |       |        |               |       |        |        |                |        |       |        |                         |     |       |       |    |    |    |   |   |   |   |  |  |
| SGO_1504                                                   |            | 3.785 |        |        |            | 3.785 |        |        |              | 3.785 |        |        |             |        |       |        |               |       |        |        |                |        |       |        |                         |     |       |       |    |    |    |   |   |   |   |  |  |
| histidine kinase                                           |            |       |        |        |            |       |        |        |              |       |        |        |             |        |       |        |               |       |        |        |                |        |       |        |                         |     |       |       |    |    |    |   |   |   |   |  |  |
| SGO_1507                                                   |            | 5.334 |        |        |            | 5.334 |        |        |              | 5.334 |        |        |             |        |       |        |               |       |        |        |                |        |       |        |                         |     |       |       |    |    |    |   |   |   |   |  |  |
| hypothetical protein SGO_1507                              |            |       |        |        |            |       |        |        |              |       |        |        |             |        |       |        |               |       |        |        |                |        |       |        |                         |     |       |       |    |    |    |   |   |   |   |  |  |
| SGO_1512                                                   | 1.099      | 4.069 | 0.0412 | 0.2271 | 0.741      | 3.060 |        |        |              | 1.643 |        |        |             | -0.358 | 3.726 | 0.0645 | 0.4512        |       | 2.648  |        |                |        | 1.871 |        |                         |     |       |       |    |    |    |   |   |   |   |  |  |
| lacG; 6-phospho-beta-galactosidase                         |            |       |        |        |            |       |        |        |              |       |        |        |             |        |       |        |               |       |        |        |                |        |       |        |                         |     |       |       |    |    |    |   |   |   |   |  |  |
| SGO_1513                                                   |            | 1.807 |        |        |            | 1.807 |        |        |              | 1.807 |        |        |             |        |       |        |               |       |        |        |                |        |       |        |                         |     |       |       |    |    |    |   |   |   |   |  |  |
| lacE; PTS system, lactose-specific IIBC component          |            |       |        |        |            |       |        |        |              |       |        |        |             |        |       |        |               |       |        |        |                |        |       |        |                         |     |       |       |    |    |    |   |   |   |   |  |  |
| SGO_1516                                                   |            | 4.452 |        |        | 1.216      | 6.199 | 0.0050 | 0.0144 | 0.291        | 5.601 | 0.0057 | 0.0306 |             | 5.175  |       |        |               | 3.613 |        |        |                | -0.925 | 5.776 | 0.0172 | 0.0219                  |     |       |       |    |    |    |   |   |   |   |  |  |
| lacD-2; tagatose 1,6-diphosphate aldolase                  |            |       |        |        |            |       |        |        |              |       |        |        |             |        |       |        |               |       |        |        |                |        |       |        |                         |     |       |       |    |    |    |   |   |   |   |  |  |
| SGO_1518                                                   |            | 3.417 |        |        | 0.892      | 4.926 | 0.0015 | 0.0030 |              | 3.417 |        |        |             | 3.788  |       |        |               |       |        |        |                | 3.788  |       |        |                         |     |       |       |    |    |    |   |   |   |   |  |  |
| lacB-2; galactose-6-phosphate isomerase, LacB subunit      |            |       |        |        |            |       |        |        |              |       |        |        |             |        |       |        |               |       |        |        |                |        |       |        |                         |     |       |       |    |    |    |   |   |   |   |  |  |
| SGO_1520                                                   |            | 3.058 |        |        |            | 3.058 |        |        |              | 3.058 |        |        |             |        |       |        |               |       |        |        |                |        |       |        |                         |     |       |       |    |    |    |   |   |   |   |  |  |
| PTS system, IIC component                                  |            |       |        |        |            |       |        |        |              |       |        |        |             |        |       |        |               |       |        |        |                |        |       |        |                         |     |       |       |    |    |    |   |   |   |   |  |  |
| SGO_1521                                                   |            | 2.170 |        |        |            | 2.170 |        |        |              | 2.170 |        |        |             |        |       |        |               |       |        |        |                |        |       |        |                         |     |       |       |    |    |    |   |   |   |   |  |  |
| PTS system IIB component (galactitol/fructose specific)    |            |       |        |        |            |       |        |        |              |       |        |        |             |        |       |        |               |       |        |        |                |        |       |        |                         |     |       |       |    |    |    |   |   |   |   |  |  |
| SGO_1523                                                   |            |       |        |        |            |       |        |        |              |       |        |        |             |        |       |        |               |       |        |        |                |        |       |        |                         |     |       |       |    |    |    |   |   |   |   |  |  |
| lacD-1; tagatose 1,6-diphosphate aldolase                  |            |       |        |        |            |       |        |        |              |       |        |        |             |        |       |        |               |       |        |        |                |        |       |        |                         |     |       |       |    |    |    |   |   |   |   |  |  |
| SGO_1527                                                   |            | 1.865 |        |        |            | 1.865 |        |        |              | 1.865 |        |        |             |        |       |        |               |       |        |        |                |        |       |        |                         |     |       |       |    |    |    |   |   |   |   |  |  |
| Lactose phosphotransferase system repressor                |            |       |        |        |            |       |        |        |              |       |        |        |             |        |       |        |               |       |        |        |                |        |       |        |                         |     |       |       |    |    |    |   |   |   |   |  |  |

Show detected proteins only  
 Show all proteins

Proteins found:  
1179

Filter by category:  
ABC Transporter

Dot Plots  
Dot Plots

Test Cutoff

q-Value

p-Value

.005

| Signif | Direction | Applies To   |
|--------|-----------|--------------|
| yes    | +         | ratios, bars |
| no     | n/a       | bars         |
| yes    | -         | ratios, bars |
| yes    | +         | p-, q-Values |
| yes    | -         | p-, q-Values |

SgFn vs Sg — — SgPg vs Sg  
SgPgFn vs Sg — — SgPg vs SgFn  
SgPgFn vs SgFn — — SgPgFn vs SgPg

Summary Table SgFn vs Sg SgPg vs Sg SgPgFn vs Sg SgPg v SgFn SgPgFn v SgFn SgPgFn vs SgPg Coverage

| Protein                                       | SgFn vs Sg   |        |               |        | SgPg vs Sg   |        |               |        | SgPgFn vs Sg |        |        |        | SgPg v SgFn  |        |               |        | SgPgFn v SgFn |       |        |        | SgPgFn vs SgPg |       |        |        | Log <sub>2</sub> Ratios |     |       |       |    |    |    |   |   |   |   |  |
|-----------------------------------------------|--------------|--------|---------------|--------|--------------|--------|---------------|--------|--------------|--------|--------|--------|--------------|--------|---------------|--------|---------------|-------|--------|--------|----------------|-------|--------|--------|-------------------------|-----|-------|-------|----|----|----|---|---|---|---|--|
|                                               | Ratio        | Sum    | q-Val         | p-Val  | Ratio        | Sum    | q-Val         | p-Val  | Ratio        | Sum    | q-Val  | p-Val  | Ratio        | Sum    | q-Val         | p-Val  | Ratio         | Sum   | q-Val  | p-Val  | Ratio          | Sum   | q-Val  | p-Val  | Ratio                   | Sum | q-Val | p-Val | -6 | -4 | -2 | 0 | 2 | 4 | 6 |  |
| <b>SGO_1529</b>                               | -1.110       | 6.071  | 0.0007        | 0.0011 | -1.199       | 6.053  | 0.0017        | 0.0037 |              | 5.519  |        |        | -0.089       | 4.876  | 0.1076        | 0.8056 |               | 3.294 |        |        |                | 3.846 |        |        |                         |     |       |       |    |    |    |   |   |   |   |  |
| hypothetical protein SGO_1529                 |              |        |               |        |              |        |               |        |              |        |        |        |              |        |               |        |               |       |        |        |                |       |        |        |                         |     |       |       |    |    |    |   |   |   |   |  |
| <b>SGO_1530</b>                               | -0.620       | 8.210  | 0.0111        | 0.0443 | 0.080        | 8.516  | 0.1062        | 0.5268 | -0.321       | 8.323  | 0.0092 | 0.0575 | <b>0.700</b> | 7.741  | <b>0.0048</b> | 0.0180 | 0.299         | 6.897 | 0.0330 | 0.1849 | -0.402         | 7.851 | 0.0073 | 0.0049 |                         |     |       |       |    |    |    |   |   |   |   |  |
| methionine-tRNA ligase                        |              |        |               |        |              |        |               |        |              |        |        |        |              |        |               |        |               |       |        |        |                |       |        |        |                         |     |       |       |    |    |    |   |   |   |   |  |
| <b>SGO_1531</b>                               | 0.311        | 5.961  | 0.0299        | 0.1548 | <b>0.988</b> | 6.363  | <b>0.0013</b> | 0.0023 | 0.273        | 5.947  | 0.0295 | 0.2398 | 0.677        | 5.972  | 0.0060        | 0.0243 | -0.038        | 4.984 | 0.1282 | 0.9234 | -0.715         | 5.962 | 0.0212 | 0.0304 |                         |     |       |       |    |    |    |   |   |   |   |  |
| xth; exodeoxyribonuclease III                 |              |        |               |        |              |        |               |        |              |        |        |        |              |        |               |        |               |       |        |        |                |       |        |        |                         |     |       |       |    |    |    |   |   |   |   |  |
| <b>SGO_1534</b>                               | 1.195        | 5.714  | 0.0220        | 0.1038 | 1.089        | 5.713  | 0.0490        | 0.2161 | 1.284        | 5.196  | 0.0428 | 0.3687 | -0.106       | 5.567  | 0.1294        | 0.9952 | 0.089         | 4.573 | 0.0468 | 0.2795 | 0.195          | 5.182 | 0.2345 | 0.8886 |                         |     |       |       |    |    |    |   |   |   |   |  |
| ArsC family                                   |              |        |               |        |              |        |               |        |              |        |        |        |              |        |               |        |               |       |        |        |                |       |        |        |                         |     |       |       |    |    |    |   |   |   |   |  |
| <b>SGO_1536</b>                               | -0.922       | 6.083  | 0.0065        | 0.0228 | -0.019       | 6.475  | 0.1779        | 0.9526 | -0.798       | 6.124  | 0.0053 | 0.0282 | 0.903        | 5.581  | 0.0127        | 0.0647 | 0.124         | 4.493 | 0.0921 | 0.6369 | -0.779         | 5.622 | 0.0396 | 0.0794 |                         |     |       |       |    |    |    |   |   |   |   |  |
| conserved hypothetical protein TIGR00096      |              |        |               |        |              |        |               |        |              |        |        |        |              |        |               |        |               |       |        |        |                |       |        |        |                         |     |       |       |    |    |    |   |   |   |   |  |
| <b>SGO_1538</b>                               |              | 3.266  |               |        |              | 3.266  |               |        |              | 3.266  |        |        |              |        |               |        |               |       |        |        |                |       |        |        |                         |     |       |       |    |    |    |   |   |   |   |  |
| DNA-directed DNA polymerase III, delta" chain |              |        |               |        |              |        |               |        |              |        |        |        |              |        |               |        |               |       |        |        |                |       |        |        |                         |     |       |       |    |    |    |   |   |   |   |  |
| <b>SGO_1539</b>                               | 0.151        | 6.166  | 0.0639        | 0.3839 | <b>0.530</b> | 6.365  | <b>0.0031</b> | 0.0075 | 0.614        | 6.430  | 0.0085 | 0.0520 | 0.379        | 5.928  | 0.0213        | 0.1226 | 0.463         | 5.379 | 0.0278 | 0.1490 | 0.084          | 6.150 | 0.1727 | 0.5986 |                         |     |       |       |    |    |    |   |   |   |   |  |
| tmk; thymidylate kinase                       |              |        |               |        |              |        |               |        |              |        |        |        |              |        |               |        |               |       |        |        |                |       |        |        |                         |     |       |       |    |    |    |   |   |   |   |  |
| <b>SGO_1540</b>                               |              | 4.984  |               |        | -2.147       | 5.138  | 0.0124        | 0.0428 |              | 4.984  |        |        |              | 1.322  |               |        |               |       |        |        |                | 1.322 |        |        |                         |     |       |       |    |    |    |   |   |   |   |  |
| YitT family protein                           |              |        |               |        |              |        |               |        |              |        |        |        |              |        |               |        |               |       |        |        |                |       |        |        |                         |     |       |       |    |    |    |   |   |   |   |  |
| <b>SGO_1541</b>                               | -0.363       | 8.032  | 0.0624        | 0.3731 | -1.636       | 7.569  | 0.0014        | 0.0025 | -2.232       | 7.454  | 0.0008 | 0.0022 | -1.273       | 6.843  | 0.0107        | 0.0508 | -1.869        | 6.097 | 0.0086 | 0.0335 | -0.596         | 5.759 | 0.0271 | 0.0458 |                         |     |       |       |    |    |    |   |   |   |   |  |
| atpC; ATP synthase F1, epsilon subunit        |              |        |               |        |              |        |               |        |              |        |        |        |              |        |               |        |               |       |        |        |                |       |        |        |                         |     |       |       |    |    |    |   |   |   |   |  |
| <b>SGO_1542</b>                               | <b>0.619</b> | 11.040 | <b>0.0001</b> | 0.0001 | -1.008       | 10.281 | 0.0002        | 0.0001 | -1.022       | 10.277 | 0.0002 | 0.0002 | -1.626       | 10.208 | 0.0000        | 0.0000 | -1.641        | 9.594 | 0.0001 | 0.0000 | -0.014         | 9.171 | 0.2260 | 0.8480 |                         |     |       |       |    |    |    |   |   |   |   |  |
| atpD; ATP synthase F1, beta subunit           |              |        |               |        |              |        |               |        |              |        |        |        |              |        |               |        |               |       |        |        |                |       |        |        |                         |     |       |       |    |    |    |   |   |   |   |  |
| <b>SGO_1543</b>                               | 0.383        | 8.135  | 0.0131        | 0.0553 | -1.291       | 7.418  | 0.0002        | 0.0001 | -2.555       | 7.153  | 0.0001 | 0.0001 | -1.674       | 7.196  | 0.0013        | 0.0029 | -2.938        | 6.372 | 0.0011 | 0.0015 | -1.264         | 5.625 | 0.0026 | 0.0005 |                         |     |       |       |    |    |    |   |   |   |   |  |
| atpG; ATP synthase F1, gamma subunit          |              |        |               |        |              |        |               |        |              |        |        |        |              |        |               |        |               |       |        |        |                |       |        |        |                         |     |       |       |    |    |    |   |   |   |   |  |
| <b>SGO_1544</b>                               | -0.415       | 10.250 | 0.0008        | 0.0014 | -0.726       | 10.124 | 0.0001        | 0.0001 | -0.675       | 10.144 | 0.0002 | 0.0003 | -0.311       | 9.368  | 0.0025        | 0.0072 | -0.260        | 8.780 | 0.0054 | 0.0184 | 0.051          | 9.229 | 0.1101 | 0.3231 |                         |     |       |       |    |    |    |   |   |   |   |  |
| atpA; ATP synthase F1, alpha subunit          |              |        |               |        |              |        |               |        |              |        |        |        |              |        |               |        |               |       |        |        |                |       |        |        |                         |     |       |       |    |    |    |   |   |   |   |  |
| <b>SGO_1545</b>                               | 0.015        | 8.292  | 0.1306        | 0.8681 | -1.669       | 7.677  | 0.0004        | 0.0004 | -2.474       | 7.521  | 0.0002 | 0.0003 | -1.684       | 7.176  | 0.0007        | 0.0008 | -2.489        | 6.412 | 0.0006 | 0.0005 | -0.805         | 5.751 | 0.0010 | 0.0001 |                         |     |       |       |    |    |    |   |   |   |   |  |
| atpH; ATP synthase F1, delta subunit          |              |        |               |        |              |        |               |        |              |        |        |        |              |        |               |        |               |       |        |        |                |       |        |        |                         |     |       |       |    |    |    |   |   |   |   |  |
| <b>SGO_1546</b>                               | -1.156       | 8.155  | 0.0064        | 0.0223 | -1.026       | 8.163  | 0.0016        | 0.0031 | -1.162       | 8.114  | 0.0003 | 0.0005 | 0.130        | 7.047  | 0.1240        | 0.9498 | -0.007        | 6.360 | 0.1038 | 0.7314 | -0.137         | 6.983 | 0.1164 | 0.3521 |                         |     |       |       |    |    |    |   |   |   |   |  |
| atpF; ATP synthase F0, B subunit              |              |        |               |        |              |        |               |        |              |        |        |        |              |        |               |        |               |       |        |        |                |       |        |        |                         |     |       |       |    |    |    |   |   |   |   |  |
| <b>SGO_1550</b>                               | 0.171        | 7.857  | 0.0596        | 0.3503 | 0.394        | 7.975  | 0.0120        | 0.0408 | -0.160       | 7.692  | 0.0416 | 0.3558 | 0.224        | 7.536  | 0.0179        | 0.1003 | -0.330        | 6.657 | 0.0181 | 0.0857 | -0.554         | 7.392 | 0.0092 | 0.0072 |                         |     |       |       |    |    |    |   |   |   |   |  |
| glgP-1; glycogen phosphorylase                |              |        |               |        |              |        |               |        |              |        |        |        |              |        |               |        |               |       |        |        |                |       |        |        |                         |     |       |       |    |    |    |   |   |   |   |  |
| <b>SGO_1551</b>                               | <b>2.324</b> | 7.034  | <b>0.0017</b> | 0.0041 | 0.606        | 5.888  | 0.1122        | 0.5606 | 0.335        | 5.734  | 0.0978 | 0.9376 | -1.718       | 6.594  | 0.0009        | 0.0014 | -1.989        | 5.919 | 0.0006 | 0.0006 | -0.272         | 5.395 | 0.1285 | 0.4007 |                         |     |       |       |    |    |    |   |   |   |   |  |
| glgA; Glycogen synthase                       |              |        |               |        |              |        |               |        |              |        |        |        |              |        |               |        |               |       |        |        |                |       |        |        |                         |     |       |       |    |    |    |   |   |   |   |  |

Show detected proteins only  
 Show all proteins

Proteins found:  
1179

Filter by category:  
ABC Transporter

Dot Plots  
Dot Plots

Test

Cutoff

q-Value

p-Value

.005

| Signif | Direction | Applies To   |
|--------|-----------|--------------|
| yes    | +         | ratios, bars |
| no     | n/a       | bars         |
| yes    | -         | ratios, bars |
| yes    | +         | p-, q-Values |
| yes    | -         | p-, q-Values |

SgFn vs Sg —  
SgPgFn vs Sg —  
SgPgFn vs SgFn —  
SgPg vs SgPg —  
SgPg vs SgFn —  
SgPgFn vs SgPg —

Summary Table SgFn vs Sg SgPg vs Sg SgPgFn vs Sg SgPg v SgFn SgPgFn v SgFn SgPgFn vs SgPg Coverage

| Protein                                                                        | SgFn vs Sg |        |        |        | SgPg vs Sg |        |        |        | SgPgFn vs Sg |        |        |        | SgPg v SgFn |        |        |        | SgPgFn v SgFn |        |        |        | SgPgFn vs SgPg |        |        |        | Log <sub>2</sub> Ratios |     |       |       |    |    |    |   |   |   |   |  |
|--------------------------------------------------------------------------------|------------|--------|--------|--------|------------|--------|--------|--------|--------------|--------|--------|--------|-------------|--------|--------|--------|---------------|--------|--------|--------|----------------|--------|--------|--------|-------------------------|-----|-------|-------|----|----|----|---|---|---|---|--|
|                                                                                | Ratio      | Sum    | q-Val  | p-Val  | Ratio      | Sum    | q-Val  | p-Val  | Ratio        | Sum    | q-Val  | p-Val  | Ratio       | Sum    | q-Val  | p-Val  | Ratio         | Sum    | q-Val  | p-Val  | Ratio          | Sum    | q-Val  | p-Val  | Ratio                   | Sum | q-Val | p-Val | -6 | -4 | -2 | 0 | 2 | 4 | 6 |  |
| <b>SGO_1552</b><br>glgD; glucose-1-phosphate adenylyltransferase, GlgD subunit | 1.390      | 7.624  | 0.0016 | 0.0035 | 0.946      | 7.357  | 0.0188 | 0.0722 | 1.172        | 7.482  | 0.0036 | 0.0174 | -0.443      | 7.456  | 0.0307 | 0.1890 | -0.218        | 6.928  | 0.0481 | 0.2886 | 0.226          | 7.345  | 0.1627 | 0.5498 |                         |     |       |       |    |    |    |   |   |   |   |  |
| <b>SGO_1553</b><br>glgC; glucose-1-phosphate adenylyltransferase               | 1.980      | 7.868  | 0.0023 | 0.0062 | 1.515      | 7.492  | 0.0004 | 0.0005 | 1.201        | 7.268  | 0.0007 | 0.0018 | -0.465      | 7.805  | 0.0137 | 0.0711 | -0.779        | 7.072  | 0.0074 | 0.0272 | -0.314         | 7.391  | 0.0050 | 0.0021 |                         |     |       |       |    |    |    |   |   |   |   |  |
| <b>SGO_1554</b><br>glgB; 1,4-alpha-glucan branching enzyme                     | 2.537      | 8.474  | 0.0005 | 0.0007 | 1.332      | 7.526  | 0.0014 | 0.0027 | 1.318        | 7.518  | 0.0012 | 0.0042 | -1.204      | 8.243  | 0.0008 | 0.0013 | -1.219        | 7.629  | 0.0011 | 0.0015 | -0.014         | 7.510  | 0.2269 | 0.8526 |                         |     |       |       |    |    |    |   |   |   |   |  |
| <b>SGO_1555</b><br>ptsI; phosphoenolpyruvate-protein phosphotransferase        | 0.328      | 11.311 | 0.0025 | 0.0069 | 0.101      | 11.189 | 0.0357 | 0.1513 | -0.270       | 11.011 | 0.0082 | 0.0487 | -0.227      | 10.842 | 0.0007 | 0.0011 | -0.598        | 10.074 | 0.0012 | 0.0019 | -0.372         | 10.552 | 0.0100 | 0.0088 |                         |     |       |       |    |    |    |   |   |   |   |  |
| <b>SGO_1556</b><br>phosphocarrier protein HPr                                  | 0.623      | 11.703 | 0.0038 | 0.0116 | 0.249      | 11.490 | 0.0302 | 0.1244 | 1.139        | 12.044 | 0.0021 | 0.0088 | -0.374      | 11.298 | 0.0151 | 0.0799 | 0.516         | 11.147 | 0.0126 | 0.0555 | 0.890          | 11.617 | 0.0158 | 0.0186 |                         |     |       |       |    |    |    |   |   |   |   |  |
| <b>SGO_1557</b><br>NrdH-redoxin                                                |            | 4.029  |        |        |            | 4.029  |        |        |              | 4.029  |        |        |             |        |        |        |               |        |        |        |                |        |        |        |                         |     |       |       |    |    |    |   |   |   |   |  |
| <b>SGO_1558</b><br>nrdE; ribonucleoside-diphosphate reductase large chain      | 0.723      | 8.951  | 0.0056 | 0.0187 | 0.059      | 8.566  | 0.0833 | 0.4048 | -0.012       | 8.530  | 0.0856 | 0.8069 | -0.663      | 8.459  | 0.0051 | 0.0197 | -0.735        | 7.821  | 0.0049 | 0.0160 | -0.072         | 8.045  | 0.0087 | 0.0065 |                         |     |       |       |    |    |    |   |   |   |   |  |
| <b>SGO_1559</b><br>ribonucleoside-diphosphate reductase, beta subunit          | 0.091      | 7.735  | 0.0544 | 0.3137 | 0.935      | 8.231  | 0.0007 | 0.0009 | 1.078        | 8.326  | 0.0002 | 0.0002 | 0.844       | 7.748  | 0.0005 | 0.0005 | 0.987         | 7.230  | 0.0001 | 0.0000 | 0.143          | 8.182  | 0.0200 | 0.0282 |                         |     |       |       |    |    |    |   |   |   |   |  |
| <b>SGO_1561</b><br>putative zinc metallopeptidase                              |            | 3.674  |        |        |            | 3.674  |        |        |              | 3.674  |        |        |             |        |        |        |               |        |        |        |                |        |        |        |                         |     |       |       |    |    |    |   |   |   |   |  |
| <b>SGO_1562</b><br>hypothetical protein SGO_1562                               |            | 4.516  |        |        |            | 4.516  |        |        |              | 4.516  |        |        |             |        |        |        |               |        |        |        |                |        |        |        |                         |     |       |       |    |    |    |   |   |   |   |  |
| <b>SGO_1564</b><br>transcription regulator, probable -related protein          |            | 6.147  |        |        | -0.168     | 7.022  | 0.0959 | 0.4718 |              | 6.147  |        |        |             | 5.371  |        |        |               |        |        |        |                | 5.371  |        |        |                         |     |       |       |    |    |    |   |   |   |   |  |
| <b>SGO_1570</b><br>alaS; alanyl-tRNA synthetase                                | -0.511     | 9.201  | 0.0126 | 0.0527 | 0.166      | 9.513  | 0.0562 | 0.2548 | -0.251       | 9.309  | 0.0180 | 0.1358 | 0.677       | 8.785  | 0.0044 | 0.0160 | 0.260         | 7.934  | 0.0345 | 0.1952 | -0.417         | 8.885  | 0.0185 | 0.0248 |                         |     |       |       |    |    |    |   |   |   |   |  |
| <b>SGO_1571</b><br>Protein of unknown function (DUF567) superfamily            |            | 4.888  |        |        |            | 4.888  |        |        |              | 4.888  |        |        |             |        |        |        |               |        |        |        |                |        |        |        |                         |     |       |       |    |    |    |   |   |   |   |  |
| <b>SGO_1572</b><br>proteinase maturation protein, putative                     | -4.463     | 9.699  | 0.0000 | 0.0000 |            | 9.632  |        |        | -5.725       | 9.645  | 0.0016 | 0.0062 |             | 4.734  |        |        | -1.262        | 4.383  | 0.0507 | 0.3099 |                | 2.394  |        |        |                         |     |       |       |    |    |    |   |   |   |   |  |
| <b>SGO_1573</b><br>O-methyltransferase family protein                          | 1.276      | 3.945  |        |        | 0.121      | 3.873  | 0.1440 | 0.7432 |              | 2.170  |        |        | -1.155      | 3.882  | 0.0245 | 0.1448 |               | 2.322  |        |        |                | 2.830  |        |        |                         |     |       |       |    |    |    |   |   |   |   |  |
| <b>SGO_1574</b><br>pepF-1; oligoendopeptidase F                                | 0.665      | 8.801  | 0.0015 | 0.0034 | 1.082      | 9.069  | 0.0001 | 0.0000 | 0.810        | 8.890  | 0.0002 | 0.0002 | 0.417       | 8.805  | 0.0019 | 0.0047 | 0.145         | 8.046  | 0.0233 | 0.1197 | -0.272         | 8.868  | 0.0050 | 0.0020 |                         |     |       |       |    |    |    |   |   |   |   |  |

Show detected proteins only  
 Show all proteins

Proteins found:  
1179

Dot Plots  
 Dot Plots

Filter by category:  
ABC Transporter

Test

Cutoff

q-Value

p-Value

.005

| Signif | Direction | Applies To   |
|--------|-----------|--------------|
| yes    | +         | ratios, bars |
| no     | n/a       | bars         |
| yes    | -         | ratios, bars |
| yes    | +         | p-, q-Values |
| yes    | -         | p-, q-Values |

SgFn vs Sg — █ SgPg vs Sg  
SgPgFn vs Sg — █ SgPg vs SgFn  
SgPgFn vs SgFn — █ SgPg vs SgFn  
SgPgFn vs SgPg — █ SgPgFn vs SgPg

Summary Table SgFn vs Sg SgPg vs Sg SgPgFn vs Sg SgPg v SgFn SgPgFn v SgFn SgPgFn vs SgPg Coverage

| Protein                                                      | SgFn vs Sg |        |        |        | SgPg vs Sg |       |        |        | SgPgFn vs Sg |       |        |        | SgPg v SgFn |        |        |        | SgPgFn v SgFn |       |        |        | SgPgFn vs SgPg |       |        |        | Log <sub>2</sub> Ratios |     |       |       |    |    |    |   |   |   |   |  |
|--------------------------------------------------------------|------------|--------|--------|--------|------------|-------|--------|--------|--------------|-------|--------|--------|-------------|--------|--------|--------|---------------|-------|--------|--------|----------------|-------|--------|--------|-------------------------|-----|-------|-------|----|----|----|---|---|---|---|--|
|                                                              | Ratio      | Sum    | q-Val  | p-Val  | Ratio      | Sum   | q-Val  | p-Val  | Ratio        | Sum   | q-Val  | p-Val  | Ratio       | Sum    | q-Val  | p-Val  | Ratio         | Sum   | q-Val  | p-Val  | Ratio          | Sum   | q-Val  | p-Val  | Ratio                   | Sum | q-Val | p-Val | -6 | -4 | -2 | 0 | 2 | 4 | 6 |  |
| <b>SGO_1576</b>                                              |            | 2.832  |        |        |            | 2.832 |        |        |              | 2.832 |        |        |             |        |        |        |               |       |        |        |                |       |        |        |                         |     |       |       |    |    |    |   |   |   |   |  |
| ptcC; PTS system, IIC component                              |            |        |        |        |            |       |        |        |              |       |        |        |             |        |        |        |               |       |        |        |                |       |        |        |                         |     |       |       |    |    |    |   |   |   |   |  |
| <b>SGO_1580</b>                                              |            | 3.178  |        |        |            | 4.634 |        |        |              | 4.506 |        |        | 1.452       | 4.570  | 0.0007 | 0.0009 | 1.302         | 3.866 | 0.0039 | 0.0118 | -0.150         | 5.058 | 0.1529 | 0.4943 |                         |     |       |       |    |    |    |   |   |   |   |  |
| PTS system, Lactose/Cellobiose specific IIB subunit          |            |        |        |        |            |       |        |        |              |       |        |        |             |        |        |        |               |       |        |        |                |       |        |        |                         |     |       |       |    |    |    |   |   |   |   |  |
| <b>SGO_1585</b>                                              |            | 6.024  |        |        | -2.854     | 6.245 | 0.0039 | 0.0104 | -2.399       | 6.151 | 0.0222 | 0.1761 |             | 2.920  |        |        |               | 1.461 |        |        | 0.456          | 3.557 | 0.2327 | 0.8803 |                         |     |       |       |    |    |    |   |   |   |   |  |
| D-Alanyl-D-Alanine carboxypeptidase                          |            |        |        |        |            |       |        |        |              |       |        |        |             |        |        |        |               |       |        |        |                |       |        |        |                         |     |       |       |    |    |    |   |   |   |   |  |
| <b>SGO_1587</b>                                              | 0.505      | 6.189  | 0.0397 | 0.2167 | 0.437      | 6.170 | 0.0692 | 0.3251 | -0.217       | 5.809 | 0.0458 | 0.3997 | -0.068      | 5.865  | 0.1190 | 0.9045 | -0.722        | 4.947 | 0.0075 | 0.0278 | -0.654         | 5.537 | 0.0426 | 0.0902 |                         |     |       |       |    |    |    |   |   |   |   |  |
| queA; S-adenosylmethionine:tRNA ribosyltransferase-isomerase |            |        |        |        |            |       |        |        |              |       |        |        |             |        |        |        |               |       |        |        |                |       |        |        |                         |     |       |       |    |    |    |   |   |   |   |  |
| <b>SGO_1588</b>                                              |            | 3.890  |        |        |            | 3.890 |        |        |              | 3.890 |        |        |             |        |        |        |               |       |        |        |                |       |        |        |                         |     |       |       |    |    |    |   |   |   |   |  |
| arcR; arginine repressor                                     |            |        |        |        |            |       |        |        |              |       |        |        |             |        |        |        |               |       |        |        |                |       |        |        |                         |     |       |       |    |    |    |   |   |   |   |  |
| <b>SGO_1589</b>                                              | 2.726      | 6.450  | 0.0001 | 0.0000 |            | 3.546 |        |        |              | 3.546 |        |        |             | 5.730  |        |        |               | 5.120 |        |        |                |       |        |        |                         |     |       |       |    |    |    |   |   |   |   |  |
| arcT; putative transaminase/peptidase                        |            |        |        |        |            |       |        |        |              |       |        |        |             |        |        |        |               |       |        |        |                |       |        |        |                         |     |       |       |    |    |    |   |   |   |   |  |
| <b>SGO_1590</b>                                              | -1.292     | 7.433  | 0.0008 | 0.0014 |            | 6.934 |        |        |              | 6.934 |        |        |             | 5.146  |        |        |               | 4.535 |        |        |                |       |        |        |                         |     |       |       |    |    |    |   |   |   |   |  |
| arcD; arginine-ornithine antiporter                          |            |        |        |        |            |       |        |        |              |       |        |        |             |        |        |        |               |       |        |        |                |       |        |        |                         |     |       |       |    |    |    |   |   |   |   |  |
| <b>SGO_1591</b>                                              | 1.169      | 8.010  | 0.0009 | 0.0015 | -1.436     | 6.786 | 0.0047 | 0.0131 | -1.727       | 6.702 | 0.0018 | 0.0070 | -2.605      | 7.184  | 0.0002 | 0.0001 | -2.896        | 6.530 | 0.0001 | 0.0000 | -0.291         | 5.239 | 0.0865 | 0.2333 |                         |     |       |       |    |    |    |   |   |   |   |  |
| arcC; carbamate kinase                                       |            |        |        |        |            |       |        |        |              |       |        |        |             |        |        |        |               |       |        |        |                |       |        |        |                         |     |       |       |    |    |    |   |   |   |   |  |
| <b>SGO_1592</b>                                              | 2.366      | 11.142 | 0.0009 | 0.0016 | -0.713     | 9.197 | 0.0000 | 0.0000 | -0.397       | 9.329 | 0.0032 | 0.0149 | -3.079      | 10.535 | 0.0008 | 0.0012 | -2.763        | 9.962 | 0.0010 | 0.0014 | 0.316          | 8.455 | 0.0271 | 0.0457 |                         |     |       |       |    |    |    |   |   |   |   |  |
| arcB; ornithine carbamoyltransferase                         |            |        |        |        |            |       |        |        |              |       |        |        |             |        |        |        |               |       |        |        |                |       |        |        |                         |     |       |       |    |    |    |   |   |   |   |  |
| <b>SGO_1593</b>                                              | 1.771      | 10.509 | 0.0002 | 0.0001 | -0.870     | 8.998 | 0.0009 | 0.0015 | -0.377       | 9.191 | 0.0021 | 0.0090 | -2.641      | 9.840  | 0.0002 | 0.0001 | -2.148        | 9.308 | 0.0002 | 0.0001 | 0.493          | 8.251 | 0.0030 | 0.0007 |                         |     |       |       |    |    |    |   |   |   |   |  |
| arcA; arginine deiminase                                     |            |        |        |        |            |       |        |        |              |       |        |        |             |        |        |        |               |       |        |        |                |       |        |        |                         |     |       |       |    |    |    |   |   |   |   |  |
| <b>SGO_1594</b>                                              |            | 3.486  |        |        |            | 3.486 |        |        |              | 3.486 |        |        |             |        |        |        |               |       |        |        |                |       |        |        |                         |     |       |       |    |    |    |   |   |   |   |  |
| Crp/Fnr family protein                                       |            |        |        |        |            |       |        |        |              |       |        |        |             |        |        |        |               |       |        |        |                |       |        |        |                         |     |       |       |    |    |    |   |   |   |   |  |
| <b>SGO_1598</b>                                              |            | 2.836  |        |        |            | 2.836 |        |        |              | 2.836 |        |        |             |        |        |        |               |       |        |        |                |       |        |        |                         |     |       |       |    |    |    |   |   |   |   |  |
| hypothetical protein SGO_1598                                |            |        |        |        |            |       |        |        |              |       |        |        |             |        |        |        |               |       |        |        |                |       |        |        |                         |     |       |       |    |    |    |   |   |   |   |  |
| <b>SGO_1599</b>                                              | 2.054      | 10.580 | 0.0002 | 0.0002 | 0.417      | 9.437 | 0.0020 | 0.0044 | 0.277        | 9.360 | 0.0057 | 0.0308 | -1.637      | 10.158 | 0.0003 | 0.0002 | -1.777        | 9.514 | 0.0004 | 0.0002 | -0.140         | 9.050 | 0.0520 | 0.1195 |                         |     |       |       |    |    |    |   |   |   |   |  |
| sodA; manganese-dependent superoxide dismutase               |            |        |        |        |            |       |        |        |              |       |        |        |             |        |        |        |               |       |        |        |                |       |        |        |                         |     |       |       |    |    |    |   |   |   |   |  |
| <b>SGO_1600</b>                                              |            | 3.975  |        |        |            | 3.975 |        |        |              | 3.975 |        |        |             |        |        |        |               |       |        |        |                |       |        |        |                         |     |       |       |    |    |    |   |   |   |   |  |
| DNA polymerase III, delta chain                              |            |        |        |        |            |       |        |        |              |       |        |        |             |        |        |        |               |       |        |        |                |       |        |        |                         |     |       |       |    |    |    |   |   |   |   |  |
| <b>SGO_1601</b>                                              |            | 2.604  |        |        |            | 2.604 |        |        |              | 2.604 |        |        |             |        |        |        |               |       |        |        |                |       |        |        |                         |     |       |       |    |    |    |   |   |   |   |  |
| celB; DNA internalization-related competence protein celB    |            |        |        |        |            |       |        |        |              |       |        |        |             |        |        |        |               |       |        |        |                |       |        |        |                         |     |       |       |    |    |    |   |   |   |   |  |
| <b>SGO_1604</b>                                              | -1.738     | 6.821  | 0.0006 | 0.0009 | -2.382     | 6.699 | 0.0006 | 0.0007 | -3.267       | 6.516 | 0.0101 | 0.0647 | -0.644      | 4.907  | 0.0028 | 0.0085 | -1.529        | 3.806 | 0.0025 | 0.0063 | -0.886         | 3.902 | 0.0769 | 0.2010 |                         |     |       |       |    |    |    |   |   |   |   |  |
| acyltransferase family protein                               |            |        |        |        |            |       |        |        |              |       |        |        |             |        |        |        |               |       |        |        |                |       |        |        |                         |     |       |       |    |    |    |   |   |   |   |  |

Show detected proteins only  
 Show all proteins

Proteins found:  
1179

Dot Plots  
Dot Plots

Test

Cutoff

q-Value

p-Value

.005

| Signif | Direction | Applies To   |
|--------|-----------|--------------|
| yes    | +         | ratios, bars |
| no     | n/a       | bars         |
| yes    | -         | ratios, bars |
| yes    | +         | p-, q-Values |
| yes    | -         | p-, q-Values |

SgFn vs Sg — — SgPg vs Sg  
SgPgFn vs Sg — — SgPg vs SgFn  
SgPgFn vs SgFn — — SgPgFn vs SgPg

Summary Table SgFn vs Sg SgPg vs Sg SgPgFn vs Sg SgPg v SgFn SgPgFn v SgFn SgPgFn vs SgPg Coverage

| Protein                                                               | SgFn vs Sg |        |        |        | SgPg vs Sg |        |        |        | SgPgFn vs Sg |        |        |        | SgPg v SgFn |       |        |        | SgPgFn v SgFn |       |        |        | SgPgFn vs SgPg |       |        |        | Log <sub>2</sub> Ratios |     |       |       |    |    |    |   |   |   |   |  |
|-----------------------------------------------------------------------|------------|--------|--------|--------|------------|--------|--------|--------|--------------|--------|--------|--------|-------------|-------|--------|--------|---------------|-------|--------|--------|----------------|-------|--------|--------|-------------------------|-----|-------|-------|----|----|----|---|---|---|---|--|
|                                                                       | Ratio      | Sum    | q-Val  | p-Val  | Ratio      | Sum    | q-Val  | p-Val  | Ratio        | Sum    | q-Val  | p-Val  | Ratio       | Sum   | q-Val  | p-Val  | Ratio         | Sum   | q-Val  | p-Val  | Ratio          | Sum   | q-Val  | p-Val  | Ratio                   | Sum | q-Val | p-Val | -6 | -4 | -2 | 0 | 2 | 4 | 6 |  |
| <b>SGO_1605</b>                                                       | -3.386     | 6.286  | 0.0004 | 0.0005 | -1.656     | 6.552  | 0.0008 | 0.0012 | -2.978       | 6.243  | 0.0106 | 0.0686 | 1.730       | 4.362 | 0.0005 | 0.0005 | 0.408         | 2.373 | 0.0156 | 0.0719 | -1.322         | 4.245 | 0.0396 | 0.0791 |                         |     |       |       |    |    |    |   |   |   |   |  |
| P-type ATPase, metal cation transport                                 |            |        |        |        |            |        |        |        |              |        |        |        |             |       |        |        |               |       |        |        |                |       |        |        |                         |     |       |       |    |    |    |   |   |   |   |  |
| <b>SGO_1606</b>                                                       |            | 4.275  |        |        | -0.708     | 4.993  | 0.0157 | 0.0575 |              | 4.275  |        |        |             | 3.129 |        |        |               |       |        |        |                | 3.129 |        |        |                         |     |       |       |    |    |    |   |   |   |   |  |
| DNA methyltransferase signature protein                               |            |        |        |        |            |        |        |        |              |        |        |        |             |       |        |        |               |       |        |        |                |       |        |        |                         |     |       |       |    |    |    |   |   |   |   |  |
| <b>SGO_1609</b>                                                       | -2.177     | 7.848  | 0.0001 | 0.0000 | -0.739     | 8.236  | 0.0002 | 0.0001 | -0.912       | 8.175  | 0.0003 | 0.0004 | 1.437       | 6.760 | 0.0001 | 0.0000 | 1.265         | 6.028 | 0.0008 | 0.0009 | -0.173         | 7.225 | 0.0366 | 0.0712 |                         |     |       |       |    |    |    |   |   |   |   |  |
| ATP-dependent RNA helicase, DEAD/DEAH box family                      |            |        |        |        |            |        |        |        |              |        |        |        |             |       |        |        |               |       |        |        |                |       |        |        |                         |     |       |       |    |    |    |   |   |   |   |  |
| <b>SGO_1614</b>                                                       |            | 4.239  |        |        |            | 4.239  |        |        |              | 4.239  |        |        |             |       |        |        |               |       |        |        |                |       |        |        |                         |     |       |       |    |    |    |   |   |   |   |  |
| magnesium and cobalt transporter CorA family                          |            |        |        |        |            |        |        |        |              |        |        |        |             |       |        |        |               |       |        |        |                |       |        |        |                         |     |       |       |    |    |    |   |   |   |   |  |
| <b>SGO_1617</b>                                                       | 0.495      | 6.407  | 0.0360 | 0.1921 | 0.372      | 6.364  | 0.0788 | 0.3791 | 0.146        | 6.211  | 0.0823 | 0.7733 | -0.123      | 6.060 | 0.1068 | 0.7985 | -0.349        | 5.319 | 0.0224 | 0.1137 | -0.226         | 5.887 | 0.1256 | 0.3856 |                         |     |       |       |    |    |    |   |   |   |   |  |
| prfC; peptide chain release factor 3                                  |            |        |        |        |            |        |        |        |              |        |        |        |             |       |        |        |               |       |        |        |                |       |        |        |                         |     |       |       |    |    |    |   |   |   |   |  |
| <b>SGO_1619</b>                                                       | -2.956     | 9.529  | 0.0009 | 0.0016 | -1.786     | 9.723  | 0.0017 | 0.0033 | -1.811       | 9.715  | 0.0009 | 0.0029 | 1.170       | 7.584 | 0.0024 | 0.0068 | 1.145         | 6.949 | 0.0009 | 0.0012 | -0.025         | 8.040 | 0.2193 | 0.8120 |                         |     |       |       |    |    |    |   |   |   |   |  |
| cation-transporting ATPase, E1-E2 family                              |            |        |        |        |            |        |        |        |              |        |        |        |             |       |        |        |               |       |        |        |                |       |        |        |                         |     |       |       |    |    |    |   |   |   |   |  |
| <b>SGO_1621</b>                                                       | -0.202     | 5.929  | 0.0227 | 0.1077 | -0.354     | 5.860  | 0.0078 | 0.0242 | -1.626       | 5.242  | 0.0106 | 0.0693 | -0.151      | 5.237 | 0.0278 | 0.1678 | -1.424        | 3.946 | 0.0167 | 0.0775 | -1.273         | 4.429 | 0.0358 | 0.0691 |                         |     |       |       |    |    |    |   |   |   |   |  |
| HD domain protein                                                     |            |        |        |        |            |        |        |        |              |        |        |        |             |       |        |        |               |       |        |        |                |       |        |        |                         |     |       |       |    |    |    |   |   |   |   |  |
| <b>SGO_1622</b>                                                       | 1.367      | 6.408  | 0.0013 | 0.0026 | -0.155     | 5.499  | 0.0807 | 0.3914 | 0.164        | 5.675  | 0.0620 | 0.5594 | -1.521      | 5.844 | 0.0006 | 0.0006 | -1.203        | 5.334 | 0.0019 | 0.0044 | 0.319          | 5.077 | 0.0728 | 0.1866 |                         |     |       |       |    |    |    |   |   |   |   |  |
| Cof family protein                                                    |            |        |        |        |            |        |        |        |              |        |        |        |             |       |        |        |               |       |        |        |                |       |        |        |                         |     |       |       |    |    |    |   |   |   |   |  |
| <b>SGO_1623</b>                                                       | -0.490     | 6.963  | 0.0014 | 0.0030 | -0.997     | 6.773  | 0.0003 | 0.0003 | -1.620       | 6.404  | 0.0071 | 0.0405 | -0.507      | 5.952 | 0.0012 | 0.0023 | -1.129        | 4.870 | 0.0131 | 0.0586 | -0.623         | 5.081 | 0.0248 | 0.0397 |                         |     |       |       |    |    |    |   |   |   |   |  |
| murM; MurM                                                            |            |        |        |        |            |        |        |        |              |        |        |        |             |       |        |        |               |       |        |        |                |       |        |        |                         |     |       |       |    |    |    |   |   |   |   |  |
| <b>SGO_1624</b>                                                       | 0.137      | 6.102  | 0.1018 | 0.6598 | -0.926     | 5.632  | 0.0115 | 0.0389 | -0.601       | 5.436  | 0.0431 | 0.3719 | -1.064      | 5.206 | 0.0060 | 0.0240 | -0.738        | 4.411 | 0.0501 | 0.3047 | 0.326          | 4.258 | 0.0656 | 0.1623 |                         |     |       |       |    |    |    |   |   |   |   |  |
| murN; MurN protein                                                    |            |        |        |        |            |        |        |        |              |        |        |        |             |       |        |        |               |       |        |        |                |       |        |        |                         |     |       |       |    |    |    |   |   |   |   |  |
| <b>SGO_1625</b>                                                       | -0.506     | 8.384  | 0.0006 | 0.0009 | -1.236     | 8.124  | 0.0001 | 0.0000 | -2.134       | 7.916  | 0.0001 | 0.0001 | -0.730      | 7.277 | 0.0008 | 0.0013 | -1.628        | 6.398 | 0.0008 | 0.0009 | -0.898         | 6.496 | 0.0094 | 0.0077 |                         |     |       |       |    |    |    |   |   |   |   |  |
| acetoin utilization putative/CBS domain protein                       |            |        |        |        |            |        |        |        |              |        |        |        |             |       |        |        |               |       |        |        |                |       |        |        |                         |     |       |       |    |    |    |   |   |   |   |  |
| <b>SGO_1626</b>                                                       | -2.040     | 6.616  | 0.0213 | 0.0998 | -0.735     | 7.128  | 0.0047 | 0.0132 | -0.741       | 7.124  | 0.0024 | 0.0104 | 1.305       | 5.463 | 0.0170 | 0.0947 | 1.299         | 4.843 | 0.0101 | 0.0412 | -0.006         | 6.193 | 0.2367 | 0.9031 |                         |     |       |       |    |    |    |   |   |   |   |  |
| branched-chain amino acid ABC transporter, ATP-binding protein        |            |        |        |        |            |        |        |        |              |        |        |        |             |       |        |        |               |       |        |        |                |       |        |        |                         |     |       |       |    |    |    |   |   |   |   |  |
| <b>SGO_1627</b>                                                       |            | 6.853  |        |        | -1.163     | 7.382  | 0.0038 | 0.0099 | -1.098       | 7.407  | 0.0031 | 0.0142 |             | 5.163 |        |        |               | 4.633 |        |        | 0.065          | 6.204 | 0.1828 | 0.6418 |                         |     |       |       |    |    |    |   |   |   |   |  |
| branched-chain amino acid ABC transporter, ATP-binding protein        |            |        |        |        |            |        |        |        |              |        |        |        |             |       |        |        |               |       |        |        |                |       |        |        |                         |     |       |       |    |    |    |   |   |   |   |  |
| <b>SGO_1630</b>                                                       | -3.259     | 10.217 | 0.0000 | 0.0000 | -1.166     | 10.605 | 0.0001 | 0.0000 | -1.610       | 10.482 | 0.0001 | 0.0000 | 2.093       | 8.698 | 0.0000 | 0.0000 | 1.649         | 7.739 | 0.0001 | 0.0000 | -0.444         | 9.189 | 0.0012 | 0.0001 |                         |     |       |       |    |    |    |   |   |   |   |  |
| branched-chain amino acid ABC transporter, amino acid-binding protein |            |        |        |        |            |        |        |        |              |        |        |        |             |       |        |        |               |       |        |        |                |       |        |        |                         |     |       |       |    |    |    |   |   |   |   |  |
| <b>SGO_1631</b>                                                       |            | 3.428  |        |        |            | 3.428  |        |        |              | 3.428  |        |        |             |       |        |        |               |       |        |        |                |       |        |        |                         |     |       |       |    |    |    |   |   |   |   |  |
| hypothetical protein SGO_1631                                         |            |        |        |        |            |        |        |        |              |        |        |        |             |       |        |        |               |       |        |        |                |       |        |        |                         |     |       |       |    |    |    |   |   |   |   |  |
| <b>SGO_1632</b>                                                       | 1.202      | 8.084  | 0.0031 | 0.0090 | -0.250     | 7.229  | 0.0036 | 0.0092 | 0.368        | 7.633  | 0.0375 | 0.3174 | -1.451      | 7.500 | 0.0023 | 0.0064 | -0.833        | 7.137 | 0.0239 | 0.1245 | 0.618          | 7.022 | 0.0768 | 0.1997 |                         |     |       |       |    |    |    |   |   |   |   |  |
| clpP; ATP-dependent Clp protease, proteolytic subunit ClpP            |            |        |        |        |            |        |        |        |              |        |        |        |             |       |        |        |               |       |        |        |                |       |        |        |                         |     |       |       |    |    |    |   |   |   |   |  |

Show detected proteins only  
 Show all proteins

Proteins found:  
1179

Dot Plots  
Dot Plots

Test

Cutoff

q-Value

p-Value

.005

| Signif | Direction | Applies To   |
|--------|-----------|--------------|
| yes    | +         | ratios, bars |
| no     | n/a       | bars         |
| yes    | -         | ratios, bars |
| yes    | +         | p-, q-Values |
| yes    | -         | p-, q-Values |

SgFn vs Sg —  
SgPgFn vs Sg —  
SgPgFn vs SgFn —

— SgPg vs Sg  
— SgPg vs SgFn  
— SgPgFn vs SgPg



Summary Table SgFn vs Sg SgPg vs Sg SgPgFn vs Sg SgPg v SgFn SgPgFn v SgFn SgPgFn vs SgPg Coverage

| Protein                                                                                     | SgFn vs Sg |       |        |        | SgPg vs Sg |       |        |        | SgPgFn vs Sg |       |        |        | SgPg v SgFn |       |        |        | SgPgFn v SgFn |       |        |        | SgPgFn vs SgPg |       |        |        | Log <sub>2</sub> Ratios |     |       |       |    |    |    |   |   |   |   |  |
|---------------------------------------------------------------------------------------------|------------|-------|--------|--------|------------|-------|--------|--------|--------------|-------|--------|--------|-------------|-------|--------|--------|---------------|-------|--------|--------|----------------|-------|--------|--------|-------------------------|-----|-------|-------|----|----|----|---|---|---|---|--|
|                                                                                             | Ratio      | Sum   | q-Val  | p-Val  | Ratio      | Sum   | q-Val  | p-Val  | Ratio        | Sum   | q-Val  | p-Val  | Ratio       | Sum   | q-Val  | p-Val  | Ratio         | Sum   | q-Val  | p-Val  | Ratio          | Sum   | q-Val  | p-Val  | Ratio                   | Sum | q-Val | p-Val | -6 | -4 | -2 | 0 | 2 | 4 | 6 |  |
| <b>SGO_1633</b><br>upp; uracil phosphoribosyltransferase                                    | 1.254      | 8.358 | 0.0018 | 0.0044 | 0.909      | 8.114 | 0.0001 | 0.0000 | 0.812        | 8.067 | 0.0046 | 0.0242 | -0.346      | 8.175 | 0.0121 | 0.0602 | -0.442        | 7.533 | 0.0195 | 0.0946 | -0.097         | 7.949 | 0.1841 | 0.6500 |                         |     |       |       |    |    |    |   |   |   |   |  |
| <b>SGO_1634</b><br>magnesium-translocating P-type ATPase                                    | -4.978     | 9.104 | 0.0000 | 0.0000 | -5.111     | 9.102 | 0.0000 | 0.0000 |              | 9.059 |        |        | -0.133      | 4.535 | 0.1063 | 0.7935 |               | 2.958 |        |        |                | 3.500 |        |        |                         |     |       |       |    |    |    |   |   |   |   |  |
| <b>SGO_1638</b><br>murE; UDP-N-acetylmuramoylalanyl-D-glutamate--2,6-diaminopimelate ligase | 1.909      | 5.438 | 0.0023 | 0.0061 | 1.421      | 5.055 | 0.0014 | 0.0027 |              | 3.205 |        |        | -0.488      | 5.348 | 0.0125 | 0.0623 |               | 3.968 |        |        |                | 4.073 |        |        |                         |     |       |       |    |    |    |   |   |   |   |  |
| <b>SGO_1648</b><br>ppx1; inorganic pyrophosphatase, manganese-dependent                     | 0.910      | 8.722 | 0.0009 | 0.0016 | 1.546      | 9.176 | 0.0020 | 0.0044 | 1.285        | 8.978 | 0.0004 | 0.0007 | 0.636       | 8.950 | 0.0052 | 0.0203 | 0.375         | 8.178 | 0.0014 | 0.0026 | -0.261         | 9.108 | 0.0541 | 0.1270 |                         |     |       |       |    |    |    |   |   |   |   |  |
| <b>SGO_1649</b><br>act; pyruvate formate-lyase-activating enzyme                            | -0.303     | 6.470 | 0.0116 | 0.0477 | -2.242     | 5.905 | 0.0010 | 0.0017 | -2.213       | 5.763 | 0.0122 | 0.0831 | -1.939      | 5.143 | 0.0006 | 0.0007 | -1.910        | 4.362 | 0.0027 | 0.0073 | 0.029          | 3.498 | 0.2429 | 0.9375 |                         |     |       |       |    |    |    |   |   |   |   |  |
| <b>SGO_1650</b><br>LPXTG cell wall surface protein, collagen binding domain                 |            | 7.977 |        |        |            | 7.977 |        |        |              | 7.977 |        |        |             |       |        |        |               |       |        |        |                |       |        |        |                         |     |       |       |    |    |    |   |   |   |   |  |
| <b>SGO_1651</b><br>LPXTG cell wall surface protein, nuclease/phosphatase domain             | -2.162     | 9.827 | 0.0000 | 0.0000 |            | 9.536 |        |        |              | 9.536 |        |        |             | 6.862 |        |        |               | 6.251 |        |        |                |       |        |        |                         |     |       |       |    |    |    |   |   |   |   |  |
| <b>SGO_1652</b><br>intracellular glycosyl hydrolase                                         | -0.823     | 6.776 | 0.0058 | 0.0195 | 0.184      | 7.218 | 0.0578 | 0.2631 | -0.012       | 7.118 | 0.0881 | 0.8335 | 1.008       | 6.371 | 0.0005 | 0.0005 | 0.811         | 5.633 | 0.0010 | 0.0012 | -0.197         | 6.691 | 0.0007 | 0.0000 |                         |     |       |       |    |    |    |   |   |   |   |  |
| <b>SGO_1653</b><br>trehalose PTS enzyme II                                                  | -2.067     | 8.997 | 0.0002 | 0.0002 | -2.054     | 8.998 | 0.0002 | 0.0001 | -2.355       | 8.961 | 0.0004 | 0.0007 | 0.013       | 7.115 | 0.1226 | 0.9373 | -0.288        | 6.406 | 0.0813 | 0.5500 | -0.301         | 7.020 | 0.1579 | 0.5204 |                         |     |       |       |    |    |    |   |   |   |   |  |
| <b>SGO_1655</b><br>CBS domain protein/possible hemolysin                                    | -1.918     | 7.001 | 0.0023 | 0.0060 | -2.739     | 6.857 | 0.0016 | 0.0030 |              | 6.653 |        |        | -0.821      | 4.901 | 0.0162 | 0.0886 |               | 3.653 |        |        |                | 3.417 |        |        |                         |     |       |       |    |    |    |   |   |   |   |  |
| <b>SGO_1657</b><br>membrane protein                                                         |            | 4.486 |        |        |            | 4.486 |        |        |              | 4.486 |        |        |             |       |        |        |               |       |        |        |                |       |        |        |                         |     |       |       |    |    |    |   |   |   |   |  |
| <b>SGO_1661</b><br>radical SAM protein, TIGR01212 family                                    | 0.772      | 4.627 | 0.0794 | 0.4944 |            | 3.822 |        |        |              | 3.822 |        |        |             | 2.887 |        |        |               | 2.277 |        |        |                |       |        |        |                         |     |       |       |    |    |    |   |   |   |   |  |
| <b>SGO_1665</b><br>rRNA methylase                                                           |            | 2.585 |        |        |            | 2.585 |        |        |              | 2.585 |        |        |             |       |        |        |               |       |        |        |                |       |        |        |                         |     |       |       |    |    |    |   |   |   |   |  |
| <b>SGO_1666</b><br>trkA; potassium uptake protein, Trk family                               | 0.784      | 7.821 | 0.0022 | 0.0057 | -0.970     | 6.980 | 0.0056 | 0.0162 | -2.475       | 6.630 | 0.0011 | 0.0038 | -1.754      | 7.016 | 0.0001 | 0.0000 | -3.259        | 6.176 | 0.0001 | 0.0000 | -1.505         | 5.335 | 0.0052 | 0.0026 |                         |     |       |       |    |    |    |   |   |   |   |  |
| <b>SGO_1669</b><br>ribosomal large subunit pseudouridine synthase B                         | -0.888     | 7.256 | 0.0099 | 0.0386 | -0.728     | 7.307 | 0.0126 | 0.0436 | -0.722       | 7.304 | 0.0063 | 0.0352 | 0.160       | 6.308 | 0.0762 | 0.5497 | 0.166         | 5.693 | 0.0746 | 0.4987 | 0.006          | 6.372 | 0.2463 | 0.9553 |                         |     |       |       |    |    |    |   |   |   |   |  |
| <b>SGO_1670</b><br>scpB; segregation and condensation protein B                             |            | 2.379 |        |        |            | 2.379 |        |        |              | 2.379 |        |        |             |       |        |        |               |       |        |        |                |       |        |        |                         |     |       |       |    |    |    |   |   |   |   |  |

Show detected proteins only  
 Show all proteins

Filter by category:

Proteins found:  
1179

Dot Plots  
Dot Plots

Test Cutoff

q-Value .005

p-Value

| Signif | Direction | Applies To   |
|--------|-----------|--------------|
| yes    | +         | ratios, bars |
| no     | n/a       | bars         |
| yes    | -         | ratios, bars |
| yes    | +         | p-, q-Values |
| yes    | -         | p-, q-Values |

SgFn vs Sg —  
SgPgFn vs Sg —  
SgPgFn vs SgFn —

SgPg vs Sg —  
SgPg vs SgFn —  
SgPgFn vs SgPg —

Summary Table SgFn vs Sg SgPg vs Sg SgPgFn vs Sg SgPg v SgFn SgPgFn v SgFn SgPgFn vs SgPg Coverage

| Protein                                                                              | SgFn vs Sg |        |        |        | SgPg vs Sg |        |        |        | SgPgFn vs Sg |        |        |        | SgPg v SgFn |        |        |        | SgPgFn v SgFn |       |        |        | SgPgFn vs SgPg |       |        |        | Log <sub>2</sub> Ratios |     |       |       |    |    |    |   |   |   |   |  |
|--------------------------------------------------------------------------------------|------------|--------|--------|--------|------------|--------|--------|--------|--------------|--------|--------|--------|-------------|--------|--------|--------|---------------|-------|--------|--------|----------------|-------|--------|--------|-------------------------|-----|-------|-------|----|----|----|---|---|---|---|--|
|                                                                                      | Ratio      | Sum    | q-Val  | p-Val  | Ratio      | Sum    | q-Val  | p-Val  | Ratio        | Sum    | q-Val  | p-Val  | Ratio       | Sum    | q-Val  | p-Val  | Ratio         | Sum   | q-Val  | p-Val  | Ratio          | Sum   | q-Val  | p-Val  | Ratio                   | Sum | q-Val | p-Val | -6 | -4 | -2 | 0 | 2 | 4 | 6 |  |
| <b>SGO_1674</b><br>phosphodiesterase, MJ0936 family                                  | 0.340      | 5.823  | 0.0050 | 0.0159 | -0.643     | 5.361  | 0.0040 | 0.0107 |              | 4.646  |        |        | -0.983      | 5.062  | 0.0007 | 0.0010 |               | 3.858 |        |        |                | 3.494 |        |        |                         |     |       |       |    |    |    |   |   |   |   |  |
| <b>SGO_1675</b><br>HAM1 protein-like protein                                         | 0.255      | 6.690  | 0.0603 | 0.3569 | -0.654     | 6.276  | 0.0214 | 0.0834 | -0.814       | 6.224  | 0.0104 | 0.0676 | -0.908      | 5.903  | 0.0027 | 0.0079 | -1.069        | 5.244 | 0.0031 | 0.0088 | -0.161         | 5.315 | 0.1661 | 0.5658 |                         |     |       |       |    |    |    |   |   |   |   |  |
| <b>SGO_1676</b><br>muri; glutamate racemase                                          | 0.999      | 5.350  | 0.0014 | 0.0030 | 1.692      | 5.845  | 0.0003 | 0.0002 | 1.047        | 5.395  | 0.0034 | 0.0164 | 0.694       | 5.633  | 0.0003 | 0.0002 | 0.048         | 4.668 | 0.0972 | 0.6784 | -0.645         | 5.659 | 0.0113 | 0.0108 |                         |     |       |       |    |    |    |   |   |   |   |  |
| <b>SGO_1678</b><br>lysA; diaminopimelate decarboxylase                               | 1.280      | 6.005  | 0.0026 | 0.0070 | 0.029      | 5.328  | 0.1365 | 0.6999 | -0.494       | 4.666  | 0.0386 | 0.3278 | -1.251      | 5.548  | 0.0083 | 0.0379 | -1.774        | 4.577 | 0.0233 | 0.1208 | -0.523         | 4.291 | 0.1651 | 0.5609 |                         |     |       |       |    |    |    |   |   |   |   |  |
| <b>SGO_1679</b><br>phosphotransferase system enzyme II                               | -2.373     | 10.552 | 0.0000 | 0.0000 | -1.278     | 10.798 | 0.0004 | 0.0003 | -1.444       | 10.749 | 0.0001 | 0.0000 | 1.095       | 9.069  | 0.0023 | 0.0062 | 0.929         | 8.341 | 0.0012 | 0.0019 | -0.165         | 9.433 | 0.0933 | 0.2616 |                         |     |       |       |    |    |    |   |   |   |   |  |
| <b>SGO_1680</b><br>phosphotransferase system enzyme II                               |            | 7.797  |        |        | -2.691     | 8.003  | 0.0007 | 0.0010 | -1.867       | 7.981  | 0.0139 | 0.0989 |             | 4.584  |        |        |               | 3.796 |        |        | 0.823          | 5.498 | 0.0228 | 0.0348 |                         |     |       |       |    |    |    |   |   |   |   |  |
| <b>SGO_1681</b><br>PTS system, mannose/fructose/sorbose family, IID component        | -2.678     | 10.136 | 0.0001 | 0.0000 | -1.826     | 10.284 | 0.0000 | 0.0000 | -1.822       | 10.287 | 0.0001 | 0.0001 | 0.852       | 8.227  | 0.0011 | 0.0020 | 0.855         | 7.626 | 0.0043 | 0.0131 | 0.003          | 8.594 | 0.2354 | 0.8967 |                         |     |       |       |    |    |    |   |   |   |   |  |
| <b>SGO_1683</b><br>serS; seryl-tRNA synthetase                                       | 0.183      | 8.135  | 0.0676 | 0.4105 | 0.563      | 8.319  | 0.0012 | 0.0021 | 0.372        | 8.211  | 0.0043 | 0.0219 | 0.380       | 7.907  | 0.0346 | 0.2185 | 0.189         | 7.196 | 0.0866 | 0.5936 | -0.191         | 7.970 | 0.0457 | 0.0994 |                         |     |       |       |    |    |    |   |   |   |   |  |
| <b>SGO_1684</b><br>acyl-CoA dehydrogenase family                                     |            | 4.578  |        |        | 1.477      | 6.486  | 0.0012 | 0.0020 | 1.486        | 6.497  | 0.0013 | 0.0044 |             | 5.526  |        |        |               | 4.931 |        |        | 0.009          | 6.534 | 0.2382 | 0.9134 |                         |     |       |       |    |    |    |   |   |   |   |  |
| <b>SGO_1685</b><br>putative peroxidase / antioxidant                                 | 1.132      | 6.834  | 0.0008 | 0.0013 | 2.779      | 8.132  | 0.0001 | 0.0000 | 3.050        | 8.386  | 0.0008 | 0.0023 | 1.647       | 7.820  | 0.0001 | 0.0000 | 1.918         | 7.432 | 0.0017 | 0.0038 | 0.271          | 8.571 | 0.0582 | 0.1392 |                         |     |       |       |    |    |    |   |   |   |   |  |
| <b>SGO_1687</b><br>accA; acetyl-CoA carboxylase, carboxyl transferase, alpha subunit | -0.326     | 7.903  | 0.0149 | 0.0652 | -0.031     | 8.036  | 0.1317 | 0.6708 | 0.122        | 8.112  | 0.0045 | 0.0231 | 0.295       | 7.374  | 0.0188 | 0.1060 | 0.448         | 6.848 | 0.0070 | 0.0253 | 0.153          | 7.586 | 0.0385 | 0.0760 |                         |     |       |       |    |    |    |   |   |   |   |  |
| <b>SGO_1688</b><br>accD; acetyl-CoA carboxylase, carboxyl transferase, beta subunit  | 0.081      | 6.923  | 0.1412 | 0.9507 | -0.423     | 6.692  | 0.0434 | 0.1883 | -1.406       | 6.366  | 0.0063 | 0.0357 | -0.504      | 6.188  | 0.0000 | 0.0000 | -1.487        | 5.254 | 0.0006 | 0.0005 | -0.983         | 5.513 | 0.0057 | 0.0032 |                         |     |       |       |    |    |    |   |   |   |   |  |
| <b>SGO_1689</b><br>accC; acetyl-CoA carboxylase, biotin carboxylase                  | 1.308      | 7.985  | 0.0008 | 0.0013 | 0.770      | 7.623  | 0.0018 | 0.0039 | 0.660        | 7.554  | 0.0016 | 0.0063 | -0.538      | 7.735  | 0.0021 | 0.0051 | -0.648        | 7.080 | 0.0015 | 0.0031 | -0.110         | 7.385 | 0.0381 | 0.0748 |                         |     |       |       |    |    |    |   |   |   |   |  |
| <b>SGO_1690</b><br>fabZ; beta-hydroxyacyl-(acyl-carrier-protein) dehydratase FabZ    |            | 5.237  |        |        |            | 5.878  |        |        |              | 3.396  |        |        | 0.686       | 6.080  | 0.0188 | 0.1070 | -0.770        | 4.468 | 0.0601 | 0.3863 | -1.456         | 5.603 | 0.0713 | 0.1821 |                         |     |       |       |    |    |    |   |   |   |   |  |
| <b>SGO_1691</b><br>accB; acetyl-CoA carboxylase, biotin carboxyl carrier protein     | -0.102     | 7.422  | 0.1200 | 0.7870 | 1.379      | 8.276  | 0.0017 | 0.0036 | 0.766        | 7.873  | 0.0089 | 0.0549 | 1.481       | 7.734  | 0.0013 | 0.0027 | 0.867         | 6.712 | 0.0097 | 0.0386 | -0.614         | 8.006 | 0.0102 | 0.0092 |                         |     |       |       |    |    |    |   |   |   |   |  |
| <b>SGO_1692</b><br>3-oxoacyl-[acyl-carrier-protein] synthase                         | 2.086      | 10.166 | 0.0004 | 0.0004 | 1.429      | 9.656  | 0.0001 | 0.0000 | 0.957        | 9.329  | 0.0002 | 0.0002 | -0.657      | 10.055 | 0.0015 | 0.0034 | -1.129        | 9.280 | 0.0009 | 0.0011 | -0.472         | 9.471 | 0.0019 | 0.0003 |                         |     |       |       |    |    |    |   |   |   |   |  |

Show detected proteins only  
 Show all proteins

Proteins found:  
1179

Dot Plots  
Dot Plots

Test

Cutoff

q-Value

p-Value

.005

| Signif | Direction | Applies To   |
|--------|-----------|--------------|
| yes    | +         | ratios, bars |
| no     | n/a       | bars         |
| yes    | -         | ratios, bars |
| yes    | +         | p-, q-Values |
| yes    | -         | p-, q-Values |

SgFn vs Sg —  
SgPgFn vs Sg —  
SgPgFn vs SgFn —  
SgPg vs SgPg —  
SgPg vs SgFn —  
SgPgFn vs SgPg —

Summary Table SgFn vs Sg SgPg vs Sg SgPgFn vs Sg SgPg v SgFn SgPgFn v SgFn SgPgFn vs SgPg Coverage

| Protein                                                                  | SgFn vs Sg |        |        |        | SgPg vs Sg |        |        |        | SgPgFn vs Sg |        |        |        | SgPg v SgFn |       |        |        | SgPgFn v SgFn |       |        |        | SgPgFn vs SgPg |        |        |        | Log <sub>2</sub> Ratios |     |       |       |    |    |    |   |   |   |   |  |
|--------------------------------------------------------------------------|------------|--------|--------|--------|------------|--------|--------|--------|--------------|--------|--------|--------|-------------|-------|--------|--------|---------------|-------|--------|--------|----------------|--------|--------|--------|-------------------------|-----|-------|-------|----|----|----|---|---|---|---|--|
|                                                                          | Ratio      | Sum    | q-Val  | p-Val  | Ratio      | Sum    | q-Val  | p-Val  | Ratio        | Sum    | q-Val  | p-Val  | Ratio       | Sum   | q-Val  | p-Val  | Ratio         | Sum   | q-Val  | p-Val  | Ratio          | Sum    | q-Val  | p-Val  | Ratio                   | Sum | q-Val | p-Val | -6 | -4 | -2 | 0 | 2 | 4 | 6 |  |
| <b>SGO_1693</b><br>fabG; 3-oxoacyl-(acyl-carrier-protein) reductase      | 1.153      | 7.330  | 0.0003 | 0.0003 | 0.871      | 7.143  | 0.0014 | 0.0026 | 0.329        | 6.844  | 0.0297 | 0.2420 | -0.282      | 7.146 | 0.0033 | 0.0107 | -0.824        | 6.332 | 0.0053 | 0.0180 | -0.542         | 6.773  | 0.0397 | 0.0812 |                         |     |       |       |    |    |    |   |   |   |   |  |
| <b>SGO_1694</b><br>fabD; malonyl CoA-acyl carrier protein transacylase   | 0.376      | 6.814  | 0.0294 | 0.1515 | 1.047      | 7.221  | 0.0027 | 0.0064 | 0.254        | 6.757  | 0.0396 | 0.3378 | 0.671       | 6.845 | 0.0067 | 0.0276 | -0.122        | 5.819 | 0.1009 | 0.7086 | -0.793         | 6.806  | 0.0204 | 0.0291 |                         |     |       |       |    |    |    |   |   |   |   |  |
| <b>SGO_1695</b><br>enoyl-acyl carrier protein(ACP) reductase             | 0.088      | 9.310  | 0.0294 | 0.1501 | 0.870      | 9.770  | 0.0028 | 0.0067 | 0.383        | 9.478  | 0.0104 | 0.0673 | 0.782       | 9.289 | 0.0030 | 0.0092 | 0.295         | 8.393 | 0.0233 | 0.1203 | -0.487         | 9.411  | 0.0306 | 0.0534 |                         |     |       |       |    |    |    |   |   |   |   |  |
| <b>SGO_1698</b><br>3-oxoacyl-[acyl-carrier-protein] synthase III         |            | 4.505  |        |        | -0.756     | 5.106  | 0.0515 | 0.2316 |              | 4.505  |        |        |             | 3.040 |        |        |               |       |        |        |                | 3.040  |        |        |                         |     |       |       |    |    |    |   |   |   |   |  |
| <b>SGO_1699</b><br>transcriptional regulator, MarR family                | 1.460      | 6.054  | 0.0002 | 0.0002 | 0.913      | 5.685  | 0.0055 | 0.0160 | 0.250        | 4.823  | 0.0440 | 0.3827 | -0.547      | 5.849 | 0.0043 | 0.0152 | -1.210        | 4.762 | 0.0048 | 0.0154 | -0.663         | 4.951  | 0.0888 | 0.2445 |                         |     |       |       |    |    |    |   |   |   |   |  |
| <b>SGO_1700</b><br>enoyl-CoA hydratase/isomerase family protein          | 2.949      | 8.270  | 0.0006 | 0.0010 | 0.135      | 6.207  | 0.0097 | 0.0318 | -1.156       | 5.429  | 0.0016 | 0.0063 | -2.813      | 7.773 | 0.0007 | 0.0010 | -4.105        | 7.012 | 0.0167 | 0.0776 | -1.291         | 5.028  | 0.0264 | 0.0438 |                         |     |       |       |    |    |    |   |   |   |   |  |
| <b>SGO_1701</b><br>aspartate kinase                                      | 0.868      | 7.787  | 0.0013 | 0.0027 | 0.897      | 7.802  | 0.0001 | 0.0000 | 0.450        | 7.536  | 0.0079 | 0.0461 | 0.028       | 7.657 | 0.1026 | 0.7627 | -0.419        | 6.844 | 0.0121 | 0.0527 | -0.447         | 7.468  | 0.0184 | 0.0246 |                         |     |       |       |    |    |    |   |   |   |   |  |
| <b>SGO_1708</b><br>amiF; Oligopeptide transport ATP-binding protein amiF | -2.226     | 9.714  | 0.0047 | 0.0146 | -1.595     | 9.842  | 0.0073 | 0.0220 | -1.843       | 9.787  | 0.0037 | 0.0183 | 0.630       | 8.003 | 0.0022 | 0.0059 | 0.383         | 7.250 | 0.0103 | 0.0432 | -0.248         | 8.165  | 0.0330 | 0.0603 |                         |     |       |       |    |    |    |   |   |   |   |  |
| <b>SGO_1709</b><br>amiE; Oligopeptide transport ATP-binding protein      | -3.054     | 9.803  | 0.0000 | 0.0000 | -1.584     | 10.055 | 0.0001 | 0.0000 | -1.751       | 10.017 | 0.0001 | 0.0001 | 1.471       | 7.990 | 0.0006 | 0.0007 | 1.303         | 7.267 | 0.0024 | 0.0059 | -0.168         | 8.469  | 0.1043 | 0.3029 |                         |     |       |       |    |    |    |   |   |   |   |  |
| <b>SGO_1710</b><br>amiD; Oligopeptide transport system permease protein  |            | 6.608  |        |        | -2.268     | 6.883  | 0.0003 | 0.0002 | -1.800       | 6.971  | 0.0002 | 0.0002 |             | 3.844 |        |        |               | 3.682 |        |        | 0.468          | 5.086  | 0.0227 | 0.0342 |                         |     |       |       |    |    |    |   |   |   |   |  |
| <b>SGO_1711</b><br>hppB; Oligopeptide transport system permease          | -2.691     | 8.366  | 0.0007 | 0.0012 | -1.467     | 8.602  | 0.0014 | 0.0026 | -1.236       | 8.671  | 0.0013 | 0.0049 | 1.224       | 6.684 | 0.0002 | 0.0001 | 1.455         | 6.248 | 0.0017 | 0.0038 | 0.231          | 7.297  | 0.0594 | 0.1436 |                         |     |       |       |    |    |    |   |   |   |   |  |
| <b>SGO_1712</b><br>hppA; oligopeptide-binding lipoprotein                | -1.923     | 10.854 | 0.0003 | 0.0003 | -1.011     | 11.090 | 0.0001 | 0.0000 | -0.769       | 11.175 | 0.0001 | 0.0001 | 0.912       | 9.612 | 0.0027 | 0.0079 | 1.154         | 9.163 | 0.0016 | 0.0033 | 0.242          | 10.111 | 0.0051 | 0.0024 |                         |     |       |       |    |    |    |   |   |   |   |  |
| <b>SGO_1713</b><br>hppG; oligopeptide-binding lipoprotein                | -1.214     | 10.762 | 0.0008 | 0.0013 | -1.386     | 10.708 | 0.0004 | 0.0004 | -1.142       | 10.780 | 0.0003 | 0.0005 | -0.172      | 9.436 | 0.0368 | 0.2370 | 0.072         | 8.945 | 0.0937 | 0.6499 | 0.244          | 9.467  | 0.0073 | 0.0050 |                         |     |       |       |    |    |    |   |   |   |   |  |
| <b>SGO_1715</b><br>hppH; oligopeptide-binding lipoprotein                | -1.347     | 9.552  | 0.0001 | 0.0000 | -1.406     | 9.535  | 0.0001 | 0.0000 | -1.403       | 9.537  | 0.0001 | 0.0000 | -0.060      | 8.185 | 0.0447 | 0.2998 | -0.056        | 7.577 | 0.0676 | 0.4455 | 0.004          | 8.157  | 0.2404 | 0.9264 |                         |     |       |       |    |    |    |   |   |   |   |  |
| <b>SGO_1716</b><br>oligopeptide binding protein                          | -0.893     | 9.573  | 0.0026 | 0.0072 | -0.939     | 9.553  | 0.0017 | 0.0034 | -0.817       | 9.616  | 0.0059 | 0.0323 | -0.045      | 8.522 | 0.0912 | 0.6716 | 0.076         | 8.001 | 0.0978 | 0.6839 | 0.121          | 8.584  | 0.1586 | 0.5254 |                         |     |       |       |    |    |    |   |   |   |   |  |
| <b>SGO_1717</b><br>pbb3; penicillin-binding protein 3                    | -2.333     | 6.693  | 0.0016 | 0.0037 | -3.837     | 6.483  | 0.0278 | 0.1132 |              | 6.434  |        |        | -1.505      | 3.809 | 0.0180 | 0.1005 |               | 2.965 |        |        |                | 1.063  |        |        |                         |     |       |       |    |    |    |   |   |   |   |  |

Show detected proteins only  
 Show all proteins

Proteins found:  
1179

Dot Plots  
Dot Plots

Test

Cutoff

q-Value

p-Value

.005

| Signif | Direction | Applies To   |
|--------|-----------|--------------|
| yes    | +         | ratios, bars |
| no     | n/a       | bars         |
| yes    | -         | ratios, bars |
| yes    | +         | p-, q-Values |
| yes    | -         | p-, q-Values |

SgFn vs Sg —  
SgPgFn vs Sg —  
SgPgFn vs SgFn —  
SgPg vs Sg —  
SgPg vs SgFn —  
SgPgFn vs SgPg —

|               |            |            |              |             |               |                |          |
|---------------|------------|------------|--------------|-------------|---------------|----------------|----------|
| Summary Table | SgFn vs Sg | SgPg vs Sg | SgPgFn vs Sg | SgPg v SgFn | SgPgFn v SgFn | SgPgFn vs SgPg | Coverage |
|---------------|------------|------------|--------------|-------------|---------------|----------------|----------|

| Protein                                                         | SgFn vs Sg |        |        |        | SgPg vs Sg |        |        |        | SgPgFn vs Sg |        |        |        | SgPg v SgFn |       |        |        | SgPgFn v SgFn |       |        |        | SgPgFn vs SgPg |        |        |        | Log <sub>2</sub> Ratios |     |       |       |    |    |    |   |   |   |   |  |
|-----------------------------------------------------------------|------------|--------|--------|--------|------------|--------|--------|--------|--------------|--------|--------|--------|-------------|-------|--------|--------|---------------|-------|--------|--------|----------------|--------|--------|--------|-------------------------|-----|-------|-------|----|----|----|---|---|---|---|--|
|                                                                 | Ratio      | Sum    | q-Val  | p-Val  | Ratio      | Sum    | q-Val  | p-Val  | Ratio        | Sum    | q-Val  | p-Val  | Ratio       | Sum   | q-Val  | p-Val  | Ratio         | Sum   | q-Val  | p-Val  | Ratio          | Sum    | q-Val  | p-Val  | Ratio                   | Sum | q-Val | p-Val | -6 | -4 | -2 | 0 | 2 | 4 | 6 |  |
| <b>SGO_1718</b>                                                 | -0.376     | 7.137  | 0.0406 | 0.2227 | 0.192      | 7.395  | 0.0742 | 0.3537 | -0.096       | 7.275  | 0.0867 | 0.8195 | 0.568       | 6.721 | 0.0097 | 0.0454 | 0.280         | 5.976 | 0.0608 | 0.3913 | -0.288         | 6.851  | 0.1156 | 0.3481 |                         |     |       |       |    |    |    |   |   |   |   |  |
| sufB-1; FeS assembly protein SufB                               |            |        |        |        |            |        |        |        |              |        |        |        |             |       |        |        |               |       |        |        |                |        |        |        |                         |     |       |       |    |    |    |   |   |   |   |  |
| <b>SGO_1719</b>                                                 |            | 2.946  |        |        |            | 2.946  |        |        |              | 2.946  |        |        |             |       |        |        |               |       |        |        |                |        |        |        |                         |     |       |       |    |    |    |   |   |   |   |  |
| SUF system FeS assembly protein, NifU family                    |            |        |        |        |            |        |        |        |              |        |        |        |             |       |        |        |               |       |        |        |                |        |        |        |                         |     |       |       |    |    |    |   |   |   |   |  |
| <b>SGO_1720</b>                                                 |            | 3.975  |        | 1.646  | 5.980      | 0.0008 | 0.0011 | 0.593  | 5.293        | 0.0194 | 0.1486 |        | 5.053       |       |        |        | 3.429         |       |        | -1.053 | 5.634          | 0.0073 | 0.0051 |        |                         |     |       |       |    |    |    |   |   |   |   |  |
| aminotransferase, class-V                                       |            |        |        |        |            |        |        |        |              |        |        |        |             |       |        |        |               |       |        |        |                |        |        |        |                         |     |       |       |    |    |    |   |   |   |   |  |
| <b>SGO_1721</b>                                                 | 0.391      | 7.322  | 0.0192 | 0.0878 | 0.589      | 7.430  | 0.0033 | 0.0083 | 0.411        | 7.324  | 0.0029 | 0.0128 | 0.197       | 7.090 | 0.0384 | 0.2496 | 0.020         | 6.386 | 0.1345 | 0.9787 | -0.178         | 7.092  | 0.0300 | 0.0521 |                         |     |       |       |    |    |    |   |   |   |   |  |
| sufD; FeS assembly protein SufD                                 |            |        |        |        |            |        |        |        |              |        |        |        |             |       |        |        |               |       |        |        |                |        |        |        |                         |     |       |       |    |    |    |   |   |   |   |  |
| <b>SGO_1722</b>                                                 | 0.722      | 6.904  | 0.0017 | 0.0039 | 0.437      | 6.734  | 0.0079 | 0.0243 | 0.109        | 6.599  | 0.0647 | 0.5864 | -0.285      | 6.570 | 0.0075 | 0.0318 | -0.613        | 5.854 | 0.0224 | 0.1139 | -0.328         | 6.304  | 0.1360 | 0.4258 |                         |     |       |       |    |    |    |   |   |   |   |  |
| sufC; FeS assembly ATPase SufC                                  |            |        |        |        |            |        |        |        |              |        |        |        |             |       |        |        |               |       |        |        |                |        |        |        |                         |     |       |       |    |    |    |   |   |   |   |  |
| <b>SGO_1724</b>                                                 | 0.591      | 4.101  | 0.0794 | 0.4935 | -0.127     | 3.848  | 0.1462 | 0.7567 |              | 3.339  |        |        | -0.717      | 2.988 |        |        |               | 1.692 |        |        |                | 1.585  |        |        |                         |     |       |       |    |    |    |   |   |   |   |  |
| mecA; Adapter protein mec                                       |            |        |        |        |            |        |        |        |              |        |        |        |             |       |        |        |               |       |        |        |                |        |        |        |                         |     |       |       |    |    |    |   |   |   |   |  |
| <b>SGO_1725</b>                                                 |            | 4.038  |        |        |            | 4.038  |        |        |              | 4.038  |        |        |             |       |        |        |               |       |        |        |                |        |        |        |                         |     |       |       |    |    |    |   |   |   |   |  |
| bacA; bacitracin resistance protein                             |            |        |        |        |            |        |        |        |              |        |        |        |             |       |        |        |               |       |        |        |                |        |        |        |                         |     |       |       |    |    |    |   |   |   |   |  |
| <b>SGO_1726</b>                                                 |            | 4.724  |        |        |            | 4.724  |        |        |              | 4.724  |        |        |             |       |        |        |               |       |        |        |                |        |        |        |                         |     |       |       |    |    |    |   |   |   |   |  |
| hypothetical protein SGO_1726                                   |            |        |        |        |            |        |        |        |              |        |        |        |             |       |        |        |               |       |        |        |                |        |        |        |                         |     |       |       |    |    |    |   |   |   |   |  |
| <b>SGO_1727</b>                                                 | -1.722     | 7.502  | 0.0003 | 0.0003 | -0.949     | 7.719  | 0.0005 | 0.0007 | -1.039       | 7.688  | 0.0002 | 0.0003 | 0.773       | 6.329 | 0.0041 | 0.0141 | 0.683         | 5.661 | 0.0048 | 0.0156 | -0.089         | 6.612  | 0.1273 | 0.3962 |                         |     |       |       |    |    |    |   |   |   |   |  |
| amino acid ABC transporter, amino acid-binding/permease protein |            |        |        |        |            |        |        |        |              |        |        |        |             |       |        |        |               |       |        |        |                |        |        |        |                         |     |       |       |    |    |    |   |   |   |   |  |
| <b>SGO_1728</b>                                                 | -0.925     | 7.589  | 0.0068 | 0.0241 | -1.549     | 7.411  | 0.0042 | 0.0114 | -1.188       | 7.505  | 0.0032 | 0.0153 | -0.625      | 6.253 | 0.0044 | 0.0160 | -0.263        | 5.786 | 0.0020 | 0.0047 | 0.361          | 6.099  | 0.0393 | 0.0781 |                         |     |       |       |    |    |    |   |   |   |   |  |
| glnQ; glutamine ABC transporter ATP-binding protein             |            |        |        |        |            |        |        |        |              |        |        |        |             |       |        |        |               |       |        |        |                |        |        |        |                         |     |       |       |    |    |    |   |   |   |   |  |
| <b>SGO_1729</b>                                                 |            | 9.102  |        |        |            | 6.111  |        |        |              | 5.593  |        |        | -2.961      | 8.759 | 0.0025 | 0.0072 | -3.517        | 8.099 | 0.0025 | 0.0064 | -0.556         | 6.362  | 0.0426 | 0.0903 |                         |     |       |       |    |    |    |   |   |   |   |  |
| hypothetical protein SGO_1729                                   |            |        |        |        |            |        |        |        |              |        |        |        |             |       |        |        |               |       |        |        |                |        |        |        |                         |     |       |       |    |    |    |   |   |   |   |  |
| <b>SGO_1730</b>                                                 | 0.138      | 10.208 | 0.0639 | 0.3830 | -1.409     | 9.596  | 0.0011 | 0.0019 | -1.177       | 9.659  | 0.0006 | 0.0016 | -1.547      | 9.192 | 0.0021 | 0.0053 | -1.314        | 8.639 | 0.0024 | 0.0058 | 0.232          | 8.334  | 0.0701 | 0.1788 |                         |     |       |       |    |    |    |   |   |   |   |  |
| SPFH domain/Band 7 family                                       |            |        |        |        |            |        |        |        |              |        |        |        |             |       |        |        |               |       |        |        |                |        |        |        |                         |     |       |       |    |    |    |   |   |   |   |  |
| <b>SGO_1731</b>                                                 | 0.649      | 4.113  | 0.0366 | 0.1959 | 2.963      | 5.857  | 0.0014 | 0.0026 | 2.608        | 5.540  | 0.0004 | 0.0007 | 2.314       | 5.420 | 0.0013 | 0.0029 | 1.960         | 4.510 | 0.0006 | 0.0004 | -0.354         | 5.984  | 0.0428 | 0.0909 |                         |     |       |       |    |    |    |   |   |   |   |  |
| DNA-binding response regulator                                  |            |        |        |        |            |        |        |        |              |        |        |        |             |       |        |        |               |       |        |        |                |        |        |        |                         |     |       |       |    |    |    |   |   |   |   |  |
| <b>SGO_1732</b>                                                 |            | 4.686  |        |        | 0.137      | 5.243  | 0.1748 | 0.9291 |              | 4.686  |        |        |             | 3.087 |        |        |               |       |        |        |                | 3.087  |        |        |                         |     |       |       |    |    |    |   |   |   |   |  |
| histidine kinase                                                |            |        |        |        |            |        |        |        |              |        |        |        |             |       |        |        |               |       |        |        |                |        |        |        |                         |     |       |       |    |    |    |   |   |   |   |  |
| <b>SGO_1735</b>                                                 | -0.145     | 9.384  | 0.0589 | 0.3452 | 0.067      | 9.482  | 0.0791 | 0.3811 | -0.245       | 9.332  | 0.0086 | 0.0525 | 0.211       | 8.904 | 0.0244 | 0.1434 | -0.100        | 8.136 | 0.0649 | 0.4266 | -0.312         | 8.854  | 0.0071 | 0.0047 |                         |     |       |       |    |    |    |   |   |   |   |  |
| hypothetical protein SGO_1735                                   |            |        |        |        |            |        |        |        |              |        |        |        |             |       |        |        |               |       |        |        |                |        |        |        |                         |     |       |       |    |    |    |   |   |   |   |  |
| <b>SGO_1736</b>                                                 | 1.192      | 6.293  | 0.0068 | 0.0244 | 0.919      | 6.090  | 0.0042 | 0.0115 | -0.151       | 5.089  | 0.0568 | 0.5072 | -0.273      | 6.124 | 0.0440 | 0.2941 | -1.343        | 4.908 | 0.0394 | 0.2279 | -1.070         | 5.272  | 0.0656 | 0.1608 |                         |     |       |       |    |    |    |   |   |   |   |  |
| alkaline shock protein                                          |            |        |        |        |            |        |        |        |              |        |        |        |             |       |        |        |               |       |        |        |                |        |        |        |                         |     |       |       |    |    |    |   |   |   |   |  |

Show detected proteins only  
 Show all proteins

Filter by category:

Proteins found:  
1179

Dot Plots  
Dot Plots

Test Cutoff

q-Value p-Value

.005

| Signif | Direction | Applies To   |
|--------|-----------|--------------|
| yes    | +         | ratios, bars |
| no     | n/a       | bars         |
| yes    | -         | ratios, bars |
| yes    | +         | p-, q-Values |
| yes    | -         | p-, q-Values |

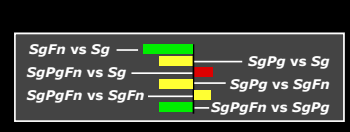

Summary Table SgFn vs Sg SgPg vs Sg SgPgFn vs Sg SgPg v SgFn SgPgFn v SgFn SgPgFn vs SgPg Coverage

| Protein  | SgFn vs Sg                                                          |        |        |        | SgPg vs Sg |        |        |        | SgPgFn vs Sg |        |        |        | SgPg v SgFn |        |        |        | SgPgFn v SgFn |        |        |        | SgPgFn vs SgPg |        |        |        | Log <sub>2</sub> Ratios |     |       |       |    |    |    |   |   |   |   |  |  |  |
|----------|---------------------------------------------------------------------|--------|--------|--------|------------|--------|--------|--------|--------------|--------|--------|--------|-------------|--------|--------|--------|---------------|--------|--------|--------|----------------|--------|--------|--------|-------------------------|-----|-------|-------|----|----|----|---|---|---|---|--|--|--|
|          | Ratio                                                               | Sum    | q-Val  | p-Val  | Ratio      | Sum    | q-Val  | p-Val  | Ratio        | Sum    | q-Val  | p-Val  | Ratio       | Sum    | q-Val  | p-Val  | Ratio         | Sum    | q-Val  | p-Val  | Ratio          | Sum    | q-Val  | p-Val  | Ratio                   | Sum | q-Val | p-Val | -6 | -4 | -2 | 0 | 2 | 4 | 6 |  |  |  |
| SGO_1737 |                                                                     | 5.867  |        |        |            | 5.867  |        |        | 2.134        | 7.515  | 0.0078 | 0.0454 |             |        |        |        |               | 5.836  |        |        |                | 6.447  |        |        |                         |     |       |       |    |    |    |   |   |   |   |  |  |  |
|          | rpmB; ribosomal protein L28                                         |        |        |        |            |        |        |        |              |        |        |        |             |        |        |        |               |        |        |        |                |        |        |        |                         |     |       |       |    |    |    |   |   |   |   |  |  |  |
| SGO_1738 | -0.253                                                              | 4.817  | 0.0847 | 0.5362 |            | 4.320  |        |        |              | 4.320  |        |        |             | 2.525  |        |        |               | 1.914  |        |        |                |        |        |        |                         |     |       |       |    |    |    |   |   |   |   |  |  |  |
|          | hypothetical protein SGO_1738                                       |        |        |        |            |        |        |        |              |        |        |        |             |        |        |        |               |        |        |        |                |        |        |        |                         |     |       |       |    |    |    |   |   |   |   |  |  |  |
| SGO_1739 | -1.358                                                              | 4.332  | 0.0238 | 0.1138 |            | 4.076  |        |        |              | 4.076  |        |        |             | 1.196  |        |        |               | 0.585  |        |        |                |        |        |        |                         |     |       |       |    |    |    |   |   |   |   |  |  |  |
|          | LytTr DNA-binding domain family                                     |        |        |        |            |        |        |        |              |        |        |        |             |        |        |        |               |        |        |        |                |        |        |        |                         |     |       |       |    |    |    |   |   |   |   |  |  |  |
| SGO_1744 | -0.225                                                              | 4.863  | 0.0260 | 0.1304 |            | 4.350  |        |        |              | 4.350  |        |        |             | 2.611  |        |        |               | 2.000  |        |        |                |        |        |        |                         |     |       |       |    |    |    |   |   |   |   |  |  |  |
|          | ABC transporter, ATP-binding protein SP0636                         |        |        |        |            |        |        |        |              |        |        |        |             |        |        |        |               |        |        |        |                |        |        |        |                         |     |       |       |    |    |    |   |   |   |   |  |  |  |
| SGO_1745 | 0.223                                                               | 11.665 | 0.0272 | 0.1384 | 1.138      | 12.225 | 0.0005 | 0.0006 | 1.424        | 12.436 | 0.0013 | 0.0044 | 0.915       | 11.782 | 0.0003 | 0.0002 | 1.201         | 11.373 | 0.0022 | 0.0053 | 0.286          | 12.325 | 0.0441 | 0.0943 |                         |     |       |       |    |    |    |   |   |   |   |  |  |  |
|          | fba; fructose-1,6-bisphosphate aldolase, class II                   |        |        |        |            |        |        |        |              |        |        |        |             |        |        |        |               |        |        |        |                |        |        |        |                         |     |       |       |    |    |    |   |   |   |   |  |  |  |
| SGO_1747 |                                                                     | 3.401  |        |        |            | 2.553  |        |        |              | 2.981  |        |        | -1.902      | 3.525  | 0.0129 | 0.0660 | -0.419        | 3.082  |        |        | 1.483          | 3.270  | 0.0461 | 0.1009 |                         |     |       |       |    |    |    |   |   |   |   |  |  |  |
|          | hypothetical protein SGO_1747                                       |        |        |        |            |        |        |        |              |        |        |        |             |        |        |        |               |        |        |        |                |        |        |        |                         |     |       |       |    |    |    |   |   |   |   |  |  |  |
| SGO_1748 | -0.482                                                              | 4.963  | 0.0203 | 0.0936 | 0.671      | 5.923  | 0.0190 | 0.0733 | 0.167        | 5.622  | 0.0423 | 0.3624 | 1.153       | 5.008  | 0.0403 | 0.2643 | 0.649         | 3.985  | 0.0510 | 0.3132 | -0.504         | 5.487  | 0.0660 | 0.1637 |                         |     |       |       |    |    |    |   |   |   |   |  |  |  |
|          | pyrG; CTP synthase                                                  |        |        |        |            |        |        |        |              |        |        |        |             |        |        |        |               |        |        |        |                |        |        |        |                         |     |       |       |    |    |    |   |   |   |   |  |  |  |
| SGO_1749 | 0.564                                                               | 6.940  | 0.0184 | 0.0837 | 0.588      | 6.953  | 0.0186 | 0.0713 | -0.386       | 6.448  | 0.0200 | 0.1552 | 0.024       | 6.688  | 0.1201 | 0.9143 | -0.950        | 5.665  | 0.0052 | 0.0173 | -0.974         | 6.290  | 0.0133 | 0.0144 |                         |     |       |       |    |    |    |   |   |   |   |  |  |  |
|          | manA; mannose-6-phosphate isomerase, class I                        |        |        |        |            |        |        |        |              |        |        |        |             |        |        |        |               |        |        |        |                |        |        |        |                         |     |       |       |    |    |    |   |   |   |   |  |  |  |
| SGO_1750 |                                                                     | 5.518  |        |        |            | 5.518  |        |        |              | 5.518  |        |        |             |        |        |        |               |        |        |        |                |        |        |        |                         |     |       |       |    |    |    |   |   |   |   |  |  |  |
|          | ABC-type multidrug/protein/lipid transport system, ATPase component |        |        |        |            |        |        |        |              |        |        |        |             |        |        |        |               |        |        |        |                |        |        |        |                         |     |       |       |    |    |    |   |   |   |   |  |  |  |
| SGO_1751 |                                                                     | 5.926  |        | -2.262 | 6.233      | 0.0014 | 0.0025 |        | 5.926        |        |        |        | 3.338       |        |        |        |               |        |        |        | 3.338          |        |        |        |                         |     |       |       |    |    |    |   |   |   |   |  |  |  |
|          | ABC-type multidrug/protein/lipid transport system, ATPase component |        |        |        |            |        |        |        |              |        |        |        |             |        |        |        |               |        |        |        |                |        |        |        |                         |     |       |       |    |    |    |   |   |   |   |  |  |  |
| SGO_1753 |                                                                     | 2.643  |        |        |            | 2.643  |        |        |              | 2.643  |        |        |             |        |        |        |               |        |        |        |                |        |        |        |                         |     |       |       |    |    |    |   |   |   |   |  |  |  |
|          | hypothetical protein SGO_1753                                       |        |        |        |            |        |        |        |              |        |        |        |             |        |        |        |               |        |        |        |                |        |        |        |                         |     |       |       |    |    |    |   |   |   |   |  |  |  |
| SGO_1755 | -0.956                                                              | 6.493  | 0.0018 | 0.0044 | 0.917      | 7.427  | 0.0037 | 0.0097 | 0.304        | 7.053  | 0.0095 | 0.0602 | 1.873       | 6.648  | 0.0011 | 0.0021 | 1.260         | 5.573  | 0.0006 | 0.0006 | -0.613         | 7.025  | 0.0163 | 0.0196 |                         |     |       |       |    |    |    |   |   |   |   |  |  |  |
|          | scrK; fructokinase                                                  |        |        |        |            |        |        |        |              |        |        |        |             |        |        |        |               |        |        |        |                |        |        |        |                         |     |       |       |    |    |    |   |   |   |   |  |  |  |
| SGO_1756 |                                                                     | 2.170  |        |        |            | 2.170  |        |        |              | 2.170  |        |        |             |        |        |        |               |        |        |        |                |        |        |        |                         |     |       |       |    |    |    |   |   |   |   |  |  |  |
|          | hypothetical protein SGO_1756                                       |        |        |        |            |        |        |        |              |        |        |        |             |        |        |        |               |        |        |        |                |        |        |        |                         |     |       |       |    |    |    |   |   |   |   |  |  |  |
| SGO_1757 | -0.656                                                              | 8.406  | 0.0149 | 0.0651 | 0.303      | 8.837  | 0.0214 | 0.0836 | -0.347       | 8.518  | 0.0137 | 0.0974 | 0.959       | 8.074  | 0.0028 | 0.0085 | 0.309         | 7.076  | 0.0451 | 0.2675 | -0.650         | 8.174  | 0.0050 | 0.0019 |                         |     |       |       |    |    |    |   |   |   |   |  |  |  |
|          | glmS; glucosamine--fructose-6-phosphate aminotransferase            |        |        |        |            |        |        |        |              |        |        |        |             |        |        |        |               |        |        |        |                |        |        |        |                         |     |       |       |    |    |    |   |   |   |   |  |  |  |
| SGO_1760 |                                                                     | 3.231  |        |        |            | 2.098  |        |        |              |        |        |        | -1.133      | 3.260  |        |        |               | 2.107  |        |        |                | 1.585  |        |        |                         |     |       |       |    |    |    |   |   |   |   |  |  |  |
|          | DNA-binding response regulator                                      |        |        |        |            |        |        |        |              |        |        |        |             |        |        |        |               |        |        |        |                |        |        |        |                         |     |       |       |    |    |    |   |   |   |   |  |  |  |
| SGO_1761 |                                                                     | 4.631  |        |        |            | 4.631  |        |        |              | 4.631  |        |        |             |        |        |        |               |        |        |        |                |        |        |        |                         |     |       |       |    |    |    |   |   |   |   |  |  |  |
|          | histidine kinase                                                    |        |        |        |            |        |        |        |              |        |        |        |             |        |        |        |               |        |        |        |                |        |        |        |                         |     |       |       |    |    |    |   |   |   |   |  |  |  |

Show detected proteins only  
 Show all proteins

Proteins found:  
1179

Dot Plots  
Dot Plots

Test

Cutoff

q-Value

.005

p-Value

| Signif | Direction | Applies To   |
|--------|-----------|--------------|
| yes    | +         | ratios, bars |
| no     | n/a       | bars         |
| yes    | -         | ratios, bars |
| yes    | +         | p-, q-Values |
| yes    | -         | p-, q-Values |

SgFn vs Sg — — SgPg vs Sg  
SgPgFn vs Sg — — SgPg vs SgFn  
SgPgFn vs SgFn — — SgPgFn vs SgPg

Summary Table SgFn vs Sg SgPg vs Sg SgPgFn vs Sg SgPg v SgFn SgPgFn v SgFn SgPgFn vs SgPg Coverage

| Protein         | SgFn vs Sg                                                    |        |               |        | SgPg vs Sg    |        |               |        | SgPgFn vs Sg  |        |               |        | SgPg v SgFn   |       |               |        | SgPgFn v SgFn |       |               |        | SgPgFn vs SgPg |        |        |        | Log <sub>2</sub> Ratios |     |       |       |    |    |    |   |   |   |   |  |  |
|-----------------|---------------------------------------------------------------|--------|---------------|--------|---------------|--------|---------------|--------|---------------|--------|---------------|--------|---------------|-------|---------------|--------|---------------|-------|---------------|--------|----------------|--------|--------|--------|-------------------------|-----|-------|-------|----|----|----|---|---|---|---|--|--|
|                 | Ratio                                                         | Sum    | q-Val         | p-Val  | Ratio         | Sum    | q-Val         | p-Val  | Ratio         | Sum    | q-Val         | p-Val  | Ratio         | Sum   | q-Val         | p-Val  | Ratio         | Sum   | q-Val         | p-Val  | Ratio          | Sum    | q-Val  | p-Val  | Ratio                   | Sum | q-Val | p-Val | -6 | -4 | -2 | 0 | 2 | 4 | 6 |  |  |
| <b>SGO_1763</b> | -0.583                                                        | 7.656  | 0.0056        | 0.0188 | 0.005         | 7.920  | 0.1768        | 0.9410 | 0.099         | 7.963  | 0.0335        | 0.2787 | 0.588         | 7.148 | 0.0069        | 0.0284 | <b>0.682</b>  | 6.589 | <b>0.0020</b> | 0.0048 | 0.094          | 7.454  | 0.1393 | 0.4415 |                         |     |       |       |    |    |    |   |   |   |   |  |  |
|                 | ABC transporter, substrate-binding protein SP0092             |        |               |        |               |        |               |        |               |        |               |        |               |       |               |        |               |       |               |        |                |        |        |        |                         |     |       |       |    |    |    |   |   |   |   |  |  |
| <b>SGO_1768</b> | <b>3.248</b>                                                  | 6.256  | <b>0.0004</b> | 0.0004 | 0.808         | 4.468  | 0.0490        | 0.2172 |               | 2.946  |               |        | <b>-2.439</b> | 5.865 | <b>0.0010</b> | 0.0018 |               | 4.979 |               |        |                |        |        |        |                         |     |       |       |    |    |    |   |   |   |   |  |  |
|                 | glycosyl hydrolase, family 38                                 |        |               |        |               |        |               |        |               |        |               |        |               |       |               |        |               |       |               |        |                |        |        |        |                         |     |       |       |    |    |    |   |   |   |   |  |  |
| <b>SGO_1772</b> |                                                               | 3.858  |               |        |               | 3.858  |               |        |               | 3.858  |               |        |               |       |               |        |               |       |               |        |                |        |        |        |                         |     |       |       |    |    |    |   |   |   |   |  |  |
|                 | integral membrane protein                                     |        |               |        |               |        |               |        |               |        |               |        |               |       |               |        |               |       |               |        |                |        |        |        |                         |     |       |       |    |    |    |   |   |   |   |  |  |
| <b>SGO_1774</b> | <b>1.620</b>                                                  | 6.691  | <b>0.0002</b> | 0.0002 | 0.032         | 5.695  | 0.1520        | 0.7951 | 0.393         | 5.898  | 0.0210        | 0.1646 | <b>-1.588</b> | 6.190 | <b>0.0005</b> | 0.0006 | <b>-1.227</b> | 5.684 | <b>0.0015</b> | 0.0028 | 0.361          | 5.406  | 0.0878 | 0.2411 |                         |     |       |       |    |    |    |   |   |   |   |  |  |
|                 | alcohol dehydrogenase, zinc-containing                        |        |               |        |               |        |               |        |               |        |               |        |               |       |               |        |               |       |               |        |                |        |        |        |                         |     |       |       |    |    |    |   |   |   |   |  |  |
| <b>SGO_1780</b> | 1.231                                                         | 3.065  |               |        |               | 1.322  |               |        |               | 1.322  |               |        |               | 2.039 |               |        |               | 1.429 |               |        |                |        |        |        |                         |     |       |       |    |    |    |   |   |   |   |  |  |
|                 | hypothetical protein SGO_1780                                 |        |               |        |               |        |               |        |               |        |               |        |               |       |               |        |               |       |               |        |                |        |        |        |                         |     |       |       |    |    |    |   |   |   |   |  |  |
| <b>SGO_1784</b> | 0.353                                                         | 8.245  | 0.0126        | 0.0527 | <b>0.586</b>  | 8.378  | 0.0027        | 0.0063 | <b>0.812</b>  | 8.516  | <b>0.0005</b> | 0.0011 | 0.233         | 8.016 | 0.0129        | 0.0663 | <b>0.459</b>  | 7.530 | <b>0.0023</b> | 0.0057 | 0.226          | 8.242  | 0.0100 | 0.0089 |                         |     |       |       |    |    |    |   |   |   |   |  |  |
|                 | leuS; leucyl-tRNA synthetase                                  |        |               |        |               |        |               |        |               |        |               |        |               |       |               |        |               |       |               |        |                |        |        |        |                         |     |       |       |    |    |    |   |   |   |   |  |  |
| <b>SGO_1792</b> | 0.124                                                         | 2.648  |               |        |               | 1.585  |               |        |               | 1.585  |               |        |               | 1.196 |               |        |               | 0.585 |               |        |                |        |        |        |                         |     |       |       |    |    |    |   |   |   |   |  |  |
|                 | transcription regulator                                       |        |               |        |               |        |               |        |               |        |               |        |               |       |               |        |               |       |               |        |                |        |        |        |                         |     |       |       |    |    |    |   |   |   |   |  |  |
| <b>SGO_1799</b> | <b>2.086</b>                                                  | 9.301  | <b>0.0001</b> | 0.0000 | <b>1.049</b>  | 8.530  | 0.0008        | 0.0012 | <b>0.779</b>  | 8.359  | <b>0.0031</b> | 0.0142 | <b>-1.037</b> | 9.053 | <b>0.0001</b> | 0.0000 | <b>-1.307</b> | 8.362 | <b>0.0004</b> | 0.0002 | -0.270         | 8.319  | 0.0358 | 0.0694 |                         |     |       |       |    |    |    |   |   |   |   |  |  |
|                 | endopeptidase O                                               |        |               |        |               |        |               |        |               |        |               |        |               |       |               |        |               |       |               |        |                |        |        |        |                         |     |       |       |    |    |    |   |   |   |   |  |  |
| <b>SGO_1800</b> |                                                               | 8.137  |               |        | <b>-2.160</b> | 8.427  | <b>0.0005</b> | 0.0007 | <b>-2.837</b> | 8.327  | <b>0.0003</b> | 0.0005 |               | 5.459 |               |        |               | 4.184 |               |        |                |        |        |        |                         |     |       |       |    |    |    |   |   |   |   |  |  |
|                 | troB; manganese ABC transporter, ATP-binding protein SP1648   |        |               |        |               |        |               |        |               |        |               |        |               |       |               |        |               |       |               |        |                |        |        |        |                         |     |       |       |    |    |    |   |   |   |   |  |  |
| <b>SGO_1802</b> | <b>-6.178</b>                                                 | 11.051 | <b>0.0003</b> | 0.0003 | <b>-2.784</b> | 11.227 | <b>0.0004</b> | 0.0004 | <b>-3.417</b> | 11.160 | <b>0.0003</b> | 0.0003 | <b>3.394</b>  | 7.883 | <b>0.0013</b> | 0.0025 | <b>2.760</b>  | 6.705 | <b>0.0014</b> | 0.0025 | -0.634         | 8.464  | 0.0272 | 0.0462 |                         |     |       |       |    |    |    |   |   |   |   |  |  |
|                 | Metal ABC transporter substrate-binding lipoprotein precursor |        |               |        |               |        |               |        |               |        |               |        |               |       |               |        |               |       |               |        |                |        |        |        |                         |     |       |       |    |    |    |   |   |   |   |  |  |
| <b>SGO_1803</b> | <b>1.164</b>                                                  | 6.483  | <b>0.0010</b> | 0.0018 | <b>1.645</b>  | 6.828  | <b>0.0001</b> | 0.0000 | <b>1.530</b>  | 6.761  | <b>0.0021</b> | 0.0088 | <b>0.481</b>  | 6.697 | <b>0.0022</b> | 0.0059 | 0.366         | 6.034 | <b>0.0255</b> | 0.1343 | -0.115         | 6.871  | 0.1727 | 0.5975 |                         |     |       |       |    |    |    |   |   |   |   |  |  |
|                 | tpx; thioredoxin peroxidase                                   |        |               |        |               |        |               |        |               |        |               |        |               |       |               |        |               |       |               |        |                |        |        |        |                         |     |       |       |    |    |    |   |   |   |   |  |  |
| <b>SGO_1804</b> | 1.496                                                         | 4.317  | 0.0079        | 0.0293 | 2.632         | 5.330  | 0.0096        | 0.0315 |               | 1.585  |               |        | <b>1.136</b>  | 5.246 | <b>0.0003</b> | 0.0002 |               | 2.958 |               |        |                | 4.705  |        |        |                         |     |       |       |    |    |    |   |   |   |   |  |  |
|                 | hutI; imidazolonepropionase                                   |        |               |        |               |        |               |        |               |        |               |        |               |       |               |        |               |       |               |        |                |        |        |        |                         |     |       |       |    |    |    |   |   |   |   |  |  |
| <b>SGO_1805</b> | 1.066                                                         | 2.272  |               |        | 4.930         | 6.617  | 0.0277        | 0.1125 | 3.472         | 5.269  | 0.0288        | 0.2332 | 3.863         | 6.129 | 0.0204        | 0.1167 | 2.406         | 4.208 | <b>0.0435</b> | 0.2567 | -1.458         | 6.549  | 0.0146 | 0.0165 |                         |     |       |       |    |    |    |   |   |   |   |  |  |
|                 | hutU; urocanate hydratase                                     |        |               |        |               |        |               |        |               |        |               |        |               |       |               |        |               |       |               |        |                |        |        |        |                         |     |       |       |    |    |    |   |   |   |   |  |  |
| <b>SGO_1806</b> |                                                               |        |               |        |               | 5.242  |               |        |               | 4.674  |               |        |               | 4.729 |               |        |               | 3.550 |               |        |                | -0.584 | 5.473  | 0.0226 | 0.0335                  |     |       |       |    |    |    |   |   |   |   |  |  |
|                 | ftcD; glutamate formiminotransferase                          |        |               |        |               |        |               |        |               |        |               |        |               |       |               |        |               |       |               |        |                |        |        |        |                         |     |       |       |    |    |    |   |   |   |   |  |  |
| <b>SGO_1807</b> |                                                               |        |               |        |               | 4.350  |               |        |               |        |               |        |               | 3.837 |               |        |               |       |               |        |                | 3.837  |        |        |                         |     |       |       |    |    |    |   |   |   |   |  |  |
|                 | serine cycle enzyme, putative                                 |        |               |        |               |        |               |        |               |        |               |        |               |       |               |        |               |       |               |        |                |        |        |        |                         |     |       |       |    |    |    |   |   |   |   |  |  |
| <b>SGO_1808</b> |                                                               | 3.816  |               |        |               | 3.454  |               |        |               | 4.970  |               |        | <b>-1.367</b> | 4.133 | <b>0.0081</b> | 0.0358 | 0.110         | 4.382 | <b>0.1057</b> | 0.7490 | 1.477          | 4.890  | 0.0163 | 0.0196 |                         |     |       |       |    |    |    |   |   |   |   |  |  |
|                 | fhs-2; formate--tetrahydrofolate ligase                       |        |               |        |               |        |               |        |               |        |               |        |               |       |               |        |               |       |               |        |                |        |        |        |                         |     |       |       |    |    |    |   |   |   |   |  |  |

Show detected proteins only  
 Show all proteins

Filter by category:

Proteins found:  
 1179

Dot Plots  
 Dot Plots

Test Cutoff

q-Value p-Value

.005

| Signif | Direction | Applies To   |
|--------|-----------|--------------|
| yes    | +         | ratios, bars |
| no     | n/a       | bars         |
| yes    | -         | ratios, bars |
| yes    | +         | p-, q-Values |
| yes    | -         |              |

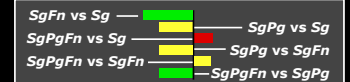

Summary Table SgFn vs Sg SgPg vs Sg SgPgFn vs Sg SgPg v SgFn SgPgFn v SgFn SgPgFn vs SgPg Coverage

| Protein                                                     | SgFn vs Sg |       |        |        | SgPg vs Sg |       |        |        | SgPgFn vs Sg |       |        |        | SgPg v SgFn |       |        |        | SgPgFn v SgFn |       |        |        | SgPgFn vs SgPg |       |        |        | Log <sub>2</sub> Ratios |     |       |       |    |    |    |   |   |   |   |  |
|-------------------------------------------------------------|------------|-------|--------|--------|------------|-------|--------|--------|--------------|-------|--------|--------|-------------|-------|--------|--------|---------------|-------|--------|--------|----------------|-------|--------|--------|-------------------------|-----|-------|-------|----|----|----|---|---|---|---|--|
|                                                             | Ratio      | Sum   | q-Val  | p-Val  | Ratio      | Sum   | q-Val  | p-Val  | Ratio        | Sum   | q-Val  | p-Val  | Ratio       | Sum   | q-Val  | p-Val  | Ratio         | Sum   | q-Val  | p-Val  | Ratio          | Sum   | q-Val  | p-Val  | Ratio                   | Sum | q-Val | p-Val | -6 | -4 | -2 | 0 | 2 | 4 | 6 |  |
| <b>SGO_1811</b>                                             | 1.763      | 4.707 | 0.0030 | 0.0087 | 1.223      | 5.013 | 0.0001 | 0.0000 | 0.311        | 3.971 | 0.0125 | 0.0864 | -0.540      | 4.773 | 0.0042 | 0.0146 | -1.453        | 3.363 |        |        | -0.913         | 4.325 | 0.0131 | 0.0141 |                         |     |       |       |    |    |    |   |   |   |   |  |
| hutH; histidine ammonia-lyase                               |            |       |        |        |            |       |        |        |              |       |        |        |             |       |        |        |               |       |        |        |                |       |        |        |                         |     |       |       |    |    |    |   |   |   |   |  |
| <b>SGO_1813</b>                                             | 0.124      | 3.063 |        |        |            | 2.000 |        |        |              | 2.000 |        |        |             | 1.611 |        |        |               | 1.000 |        |        |                |       |        |        |                         |     |       |       |    |    |    |   |   |   |   |  |
| hutG; formimidoylglutamase                                  |            |       |        |        |            |       |        |        |              |       |        |        |             |       |        |        |               |       |        |        |                |       |        |        |                         |     |       |       |    |    |    |   |   |   |   |  |
| <b>SGO_1814</b>                                             | 1.632      | 5.980 | 0.0028 | 0.0079 |            | 3.940 |        |        |              | 3.940 |        |        |             | 5.065 |        |        |               | 4.454 |        |        |                |       |        |        |                         |     |       |       |    |    |    |   |   |   |   |  |
| putative regulatory protein                                 |            |       |        |        |            |       |        |        |              |       |        |        |             |       |        |        |               |       |        |        |                |       |        |        |                         |     |       |       |    |    |    |   |   |   |   |  |
| <b>SGO_1816</b>                                             | 0.877      | 5.790 | 0.0044 | 0.0135 | 0.145      | 4.910 | 0.0440 | 0.1916 |              | 4.275 |        |        | -0.731      | 5.031 | 0.0357 | 0.2282 |               | 4.044 |        |        |                | 2.907 |        |        |                         |     |       |       |    |    |    |   |   |   |   |  |
| scaR; ScaR Manganese-dependent regulator of scaCBA          |            |       |        |        |            |       |        |        |              |       |        |        |             |       |        |        |               |       |        |        |                |       |        |        |                         |     |       |       |    |    |    |   |   |   |   |  |
| <b>SGO_1822</b>                                             | 0.126      | 7.384 | 0.0609 | 0.3615 | -1.768     | 6.687 | 0.0004 | 0.0004 | -1.916       | 6.495 | 0.0097 | 0.0614 | -1.893      | 6.278 | 0.0011 | 0.0022 | -2.042        | 5.490 | 0.0212 | 0.1059 | -0.149         | 4.569 | 0.0583 | 0.1398 |                         |     |       |       |    |    |    |   |   |   |   |  |
| relA; GTP diphosphokinase                                   |            |       |        |        |            |       |        |        |              |       |        |        |             |       |        |        |               |       |        |        |                |       |        |        |                         |     |       |       |    |    |    |   |   |   |   |  |
| <b>SGO_1823</b>                                             |            |       |        |        |            | 3.722 |        |        |              |       |        |        |             | 3.209 |        |        |               |       |        |        |                | 3.209 |        |        |                         |     |       |       |    |    |    |   |   |   |   |  |
| conserved hypothetical protein TIGR00046                    |            |       |        |        |            |       |        |        |              |       |        |        |             |       |        |        |               |       |        |        |                |       |        |        |                         |     |       |       |    |    |    |   |   |   |   |  |
| <b>SGO_1824</b>                                             | 0.490      | 5.870 | 0.0226 | 0.1071 | 0.820      | 6.059 | 0.0028 | 0.0069 | 0.344        | 5.781 | 0.0208 | 0.1628 | 0.331       | 5.742 | 0.0167 | 0.0927 | -0.145        | 4.892 | 0.0667 | 0.4389 | -0.476         | 5.675 | 0.0116 | 0.0115 |                         |     |       |       |    |    |    |   |   |   |   |  |
| prmA; ribosomal protein L11 methyltransferase               |            |       |        |        |            |       |        |        |              |       |        |        |             |       |        |        |               |       |        |        |                |       |        |        |                         |     |       |       |    |    |    |   |   |   |   |  |
| <b>SGO_1827</b>                                             | 0.838      | 5.024 | 0.0259 | 0.1289 | -0.256     | 4.992 | 0.0635 | 0.2934 |              | 4.111 |        |        | -1.094      | 4.383 | 0.0183 | 0.1026 |               | 2.807 |        |        |                | 3.348 |        |        |                         |     |       |       |    |    |    |   |   |   |   |  |
| hypothetical protein SGO_1827                               |            |       |        |        |            |       |        |        |              |       |        |        |             |       |        |        |               |       |        |        |                |       |        |        |                         |     |       |       |    |    |    |   |   |   |   |  |
| <b>SGO_1828</b>                                             | 0.994      | 5.002 | 0.0116 | 0.0472 | 0.056      | 4.482 | 0.1520 | 0.7952 | 0.528        | 4.191 | 0.0428 | 0.3679 | -0.938      | 4.525 | 0.0147 | 0.0777 | -0.466        | 3.724 | 0.0639 | 0.4192 | 0.472          | 3.741 | 0.1647 | 0.5585 |                         |     |       |       |    |    |    |   |   |   |   |  |
| ATPase, AAA family                                          |            |       |        |        |            |       |        |        |              |       |        |        |             |       |        |        |               |       |        |        |                |       |        |        |                         |     |       |       |    |    |    |   |   |   |   |  |
| <b>SGO_1834</b>                                             | 5.178      | 8.827 | 0.0008 | 0.0014 | 2.739      | 6.583 | 0.0043 | 0.0117 | 3.228        | 6.972 | 0.0001 | 0.0001 | -2.439      | 8.524 | 0.0013 | 0.0027 | -1.950        | 7.992 | 0.0015 | 0.0030 | 0.489          | 7.108 | 0.0493 | 0.1104 |                         |     |       |       |    |    |    |   |   |   |   |  |
| hypothetical protein SGO_1834                               |            |       |        |        |            |       |        |        |              |       |        |        |             |       |        |        |               |       |        |        |                |       |        |        |                         |     |       |       |    |    |    |   |   |   |   |  |
| <b>SGO_1835</b>                                             | 2.787      | 4.567 |        |        | 0.863      | 3.800 | 0.0170 | 0.0631 | 2.701        | 4.492 |        |        | -1.923      | 4.470 | 0.0032 | 0.0102 | -0.086        | 4.206 |        |        | 1.837          | 4.414 | 0.0114 | 0.0111 |                         |     |       |       |    |    |    |   |   |   |   |  |
| hypothetical protein SGO_1835                               |            |       |        |        |            |       |        |        |              |       |        |        |             |       |        |        |               |       |        |        |                |       |        |        |                         |     |       |       |    |    |    |   |   |   |   |  |
| <b>SGO_1843</b>                                             | 0.982      | 8.061 | 0.0002 | 0.0001 | 0.981      | 8.067 | 0.0026 | 0.0060 | 0.922        | 8.025 | 0.0010 | 0.0032 | -0.001      | 7.961 | 0.1224 | 0.9344 | -0.060        | 7.319 | 0.0775 | 0.5213 | -0.059         | 7.934 | 0.1835 | 0.6466 |                         |     |       |       |    |    |    |   |   |   |   |  |
| pepS; aminopeptidase PepS                                   |            |       |        |        |            |       |        |        |              |       |        |        |             |       |        |        |               |       |        |        |                |       |        |        |                         |     |       |       |    |    |    |   |   |   |   |  |
| <b>SGO_1844</b>                                             | 0.367      | 5.531 | 0.0241 | 0.1161 | 0.775      | 5.772 | 0.0050 | 0.0141 | -0.266       | 5.225 | 0.0432 | 0.3728 | 0.408       | 5.399 | 0.0074 | 0.0314 | -0.633        | 4.302 | 0.0107 | 0.0454 | -1.041         | 5.171 | 0.0100 | 0.0089 |                         |     |       |       |    |    |    |   |   |   |   |  |
| cbxX/cfqX family protein                                    |            |       |        |        |            |       |        |        |              |       |        |        |             |       |        |        |               |       |        |        |                |       |        |        |                         |     |       |       |    |    |    |   |   |   |   |  |
| <b>SGO_1847</b>                                             | 0.427      | 6.251 | 0.0392 | 0.2126 | 0.057      | 6.008 | 0.1039 | 0.5132 | -0.806       | 5.342 | 0.0155 | 0.1128 | -0.370      | 5.761 | 0.0377 | 0.2442 | -1.233        | 4.620 | 0.0507 | 0.3100 | -0.863         | 4.872 | 0.0339 | 0.0631 |                         |     |       |       |    |    |    |   |   |   |   |  |
| polC; DNA polymerase III, alpha subunit, Gram-positive type |            |       |        |        |            |       |        |        |              |       |        |        |             |       |        |        |               |       |        |        |                |       |        |        |                         |     |       |       |    |    |    |   |   |   |   |  |
| <b>SGO_1848</b>                                             |            | 7.289 |        |        | -3.095     | 7.448 | 0.0004 | 0.0005 | -3.131       | 7.451 | 0.0003 | 0.0006 |             | 3.677 |        |        |               | 3.092 |        |        | -0.036         | 4.690 | 0.2404 | 0.9247 |                         |     |       |       |    |    |    |   |   |   |   |  |
| lipoprotein, putative                                       |            |       |        |        |            |       |        |        |              |       |        |        |             |       |        |        |               |       |        |        |                |       |        |        |                         |     |       |       |    |    |    |   |   |   |   |  |
| <b>SGO_1849</b>                                             |            | 7.582 |        |        |            | 7.582 |        |        |              | 7.582 |        |        |             |       |        |        |               |       |        |        |                |       |        |        |                         |     |       |       |    |    |    |   |   |   |   |  |
| hypothetical protein SGO_1849                               |            |       |        |        |            |       |        |        |              |       |        |        |             |       |        |        |               |       |        |        |                |       |        |        |                         |     |       |       |    |    |    |   |   |   |   |  |

Show detected proteins only  
 Show all proteins

Proteins found:  
1179

Dot Plots  
Dot Plots

Test

Cutoff

q-Value

p-Value

.005

| Signif | Direction | Applies To   |
|--------|-----------|--------------|
| yes    | +         | ratios, bars |
| no     | n/a       | bars         |
| yes    | -         | ratios, bars |
| yes    | +         | p-, q-Values |
| yes    | -         | p-, q-Values |

SgFn vs Sg — — SgPg vs Sg  
SgPgFn vs Sg — — SgPg v SgFn  
SgPgFn vs SgFn — — SgPgFn vs SgPg

Summary Table SgFn vs Sg SgPg vs Sg SgPgFn vs Sg SgPg v SgFn SgPgFn v SgFn SgPgFn vs SgPg Coverage

| Protein                                              | SgFn vs Sg    |       |               |        | SgPg vs Sg    |       |               |        | SgPgFn vs Sg  |       |               |        | SgPg v SgFn   |       |               |        | SgPgFn v SgFn |       |               |        | SgPgFn vs SgPg |       |               |        | Log <sub>2</sub> Ratios |     |       |       |    |    |    |   |   |   |   |  |
|------------------------------------------------------|---------------|-------|---------------|--------|---------------|-------|---------------|--------|---------------|-------|---------------|--------|---------------|-------|---------------|--------|---------------|-------|---------------|--------|----------------|-------|---------------|--------|-------------------------|-----|-------|-------|----|----|----|---|---|---|---|--|
|                                                      | Ratio         | Sum   | q-Val         | p-Val  | Ratio         | Sum   | q-Val         | p-Val  | Ratio         | Sum   | q-Val         | p-Val  | Ratio         | Sum   | q-Val         | p-Val  | Ratio         | Sum   | q-Val         | p-Val  | Ratio          | Sum   | q-Val         | p-Val  | Ratio                   | Sum | q-Val | p-Val | -6 | -4 | -2 | 0 | 2 | 4 | 6 |  |
| <b>SGO_1851</b>                                      | 0.331         | 8.944 | 0.0137        | 0.0588 | 0.365         | 8.961 | 0.0066        | 0.0196 | <b>0.354</b>  | 8.954 | <b>0.0037</b> | 0.0181 | 0.035         | 8.603 | 0.1049        | 0.7821 | 0.024         | 7.987 | 0.1208        | 0.8624 | -0.011         | 8.612 | 0.2296        | 0.8672 |                         |     |       |       |    |    |    |   |   |   |   |  |
| proS; prolyl-tRNA synthetase                         |               |       |               |        |               |       |               |        |               |       |               |        |               |       |               |        |               |       |               |        |                |       |               |        |                         |     |       |       |    |    |    |   |   |   |   |  |
| <b>SGO_1852</b>                                      |               | 6.376 |               |        | <b>-1.841</b> | 6.734 | <b>0.0003</b> | 0.0003 | -1.808        | 6.568 | 0.0073        | 0.0423 |               | 4.036 |               |        |               | 2.442 |               |        | 0.033          | 4.627 | 0.2454        | 0.9485 |                         |     |       |       |    |    |    |   |   |   |   |  |
| membrane-associated zinc metalloprotease, putative   |               |       |               |        |               |       |               |        |               |       |               |        |               |       |               |        |               |       |               |        |                |       |               |        |                         |     |       |       |    |    |    |   |   |   |   |  |
| <b>SGO_1854</b>                                      | <b>-1.824</b> | 6.877 | <b>0.0003</b> | 0.0003 | <b>-1.307</b> | 7.017 | <b>0.0015</b> | 0.0028 | <b>-1.185</b> | 7.051 | <b>0.0011</b> | 0.0035 | 0.517         | 5.493 | 0.0244        | 0.1434 | 0.638         | 4.952 | 0.0188        | 0.0905 | 0.121          | 5.798 | 0.1989        | 0.7144 |                         |     |       |       |    |    |    |   |   |   |   |  |
| uppS; undecaprenyl diphosphate synthase              |               |       |               |        |               |       |               |        |               |       |               |        |               |       |               |        |               |       |               |        |                |       |               |        |                         |     |       |       |    |    |    |   |   |   |   |  |
| <b>SGO_1855</b>                                      |               | 7.640 |               |        | <b>-1.217</b> | 8.163 | <b>0.0022</b> | 0.0049 |               | 7.640 |               |        |               | 5.932 |               |        |               |       |               |        |                | 5.932 |               |        |                         |     |       |       |    |    |    |   |   |   |   |  |
| preprotein translocase, YajC subunit                 |               |       |               |        |               |       |               |        |               |       |               |        |               |       |               |        |               |       |               |        |                |       |               |        |                         |     |       |       |    |    |    |   |   |   |   |  |
| <b>SGO_1856</b>                                      | 2.577         | 8.999 | 0.0055        | 0.0181 | <b>-0.896</b> | 6.760 | <b>0.0005</b> | 0.0007 | <b>-0.872</b> | 6.771 | <b>0.0009</b> | 0.0027 | <b>-3.472</b> | 8.392 | <b>0.0042</b> | 0.0144 | <b>-3.449</b> | 7.784 | <b>0.0046</b> | 0.0145 | 0.023          | 5.751 | 0.2247        | 0.8416 |                         |     |       |       |    |    |    |   |   |   |   |  |
| ATP-dependent proteinase ATP-binding chain           |               |       |               |        |               |       |               |        |               |       |               |        |               |       |               |        |               |       |               |        |                |       |               |        |                         |     |       |       |    |    |    |   |   |   |   |  |
| <b>SGO_1857</b>                                      |               | 4.723 |               |        | -2.113        | 4.877 | 0.0396        | 0.1700 |               | 4.723 |               |        |               | 1.063 |               |        |               |       |               |        |                | 1.063 |               |        |                         |     |       |       |    |    |    |   |   |   |   |  |
| PTS system, IIABC components                         |               |       |               |        |               |       |               |        |               |       |               |        |               |       |               |        |               |       |               |        |                |       |               |        |                         |     |       |       |    |    |    |   |   |   |   |  |
| <b>SGO_1858</b>                                      | 2.081         | 4.249 | 0.0188        | 0.0855 | 1.448         | 3.696 | 0.0223        | 0.0881 |               | 1.000 |               |        | <b>-0.633</b> | 4.293 | <b>0.0040</b> | 0.0137 |               | 2.965 |               |        |                | 2.941 |               |        |                         |     |       |       |    |    |    |   |   |   |   |  |
| beta-fructofuranosidase/sucrose 6 phoshate hydrolase |               |       |               |        |               |       |               |        |               |       |               |        |               |       |               |        |               |       |               |        |                |       |               |        |                         |     |       |       |    |    |    |   |   |   |   |  |
| <b>SGO_1860</b>                                      | -0.612        | 9.299 | 0.0202        | 0.0926 | <b>-1.332</b> | 9.034 | <b>0.0020</b> | 0.0044 | <b>-1.747</b> | 8.928 | <b>0.0009</b> | 0.0028 | -0.721        | 8.138 | 0.0156        | 0.0833 | -1.135        | 7.389 | 0.0101        | 0.0407 | -0.414         | 7.507 | 0.0146        | 0.0165 |                         |     |       |       |    |    |    |   |   |   |   |  |
| 5'-nucleotidase, lipoprotein e(P4) family            |               |       |               |        |               |       |               |        |               |       |               |        |               |       |               |        |               |       |               |        |                |       |               |        |                         |     |       |       |    |    |    |   |   |   |   |  |
| <b>SGO_1861</b>                                      |               | 1.865 |               |        | 2.171         | 5.189 | 0.0108        | 0.0360 | 0.305         | 3.026 |               |        |               | 4.524 |               |        |               | 1.046 |               |        | -1.866         | 4.710 | 0.0246        | 0.0386 |                         |     |       |       |    |    |    |   |   |   |   |  |
| nusB; transcription antitermination factor NusB      |               |       |               |        |               |       |               |        |               |       |               |        |               |       |               |        |               |       |               |        |                |       |               |        |                         |     |       |       |    |    |    |   |   |   |   |  |
| <b>SGO_1862</b>                                      | <b>2.719</b>  | 8.218 | <b>0.0003</b> | 0.0004 | <b>0.941</b>  | 6.840 | <b>0.0011</b> | 0.0017 | <b>1.008</b>  | 6.883 | <b>0.0004</b> | 0.0008 | <b>-1.778</b> | 7.869 | <b>0.0006</b> | 0.0006 | <b>-1.712</b> | 7.273 | <b>0.0007</b> | 0.0007 | 0.067          | 6.752 | 0.0956        | 0.2722 |                         |     |       |       |    |    |    |   |   |   |   |  |
| alkaline shock protein                               |               |       |               |        |               |       |               |        |               |       |               |        |               |       |               |        |               |       |               |        |                |       |               |        |                         |     |       |       |    |    |    |   |   |   |   |  |
| <b>SGO_1863</b>                                      | <b>-0.622</b> | 8.044 | <b>0.0044</b> | 0.0134 | <b>0.394</b>  | 8.526 | <b>0.0017</b> | 0.0034 | <b>0.360</b>  | 8.507 | <b>0.0017</b> | 0.0065 | <b>1.017</b>  | 7.780 | <b>0.0009</b> | 0.0014 | <b>0.982</b>  | 7.147 | <b>0.0012</b> | 0.0019 | -0.035         | 8.179 | 0.1094        | 0.3198 |                         |     |       |       |    |    |    |   |   |   |   |  |
| efp; Elongation factor P (EF-P)                      |               |       |               |        |               |       |               |        |               |       |               |        |               |       |               |        |               |       |               |        |                |       |               |        |                         |     |       |       |    |    |    |   |   |   |   |  |
| <b>SGO_1864</b>                                      | <b>1.965</b>  | 8.210 | <b>0.0001</b> | 0.0001 | <b>0.586</b>  | 7.241 | <b>0.0040</b> | 0.0105 | 0.554         | 7.258 | 0.0189        | 0.1444 | <b>-1.379</b> | 7.834 | <b>0.0001</b> | 0.0000 | <b>-1.411</b> | 7.231 | <b>0.0014</b> | 0.0026 | -0.032         | 7.000 | 0.2382        | 0.9116 |                         |     |       |       |    |    |    |   |   |   |   |  |
| X-Pro aminopeptidase                                 |               |       |               |        |               |       |               |        |               |       |               |        |               |       |               |        |               |       |               |        |                |       |               |        |                         |     |       |       |    |    |    |   |   |   |   |  |
| <b>SGO_1865</b>                                      | <b>-0.360</b> | 7.560 | <b>0.0050</b> | 0.0160 | <b>-1.073</b> | 7.288 | <b>0.0003</b> | 0.0003 | <b>-1.655</b> | 7.125 | <b>0.0002</b> | 0.0001 | <b>-0.713</b> | 6.543 | <b>0.0014</b> | 0.0032 | <b>-1.295</b> | 5.738 | <b>0.0008</b> | 0.0010 | <b>-0.582</b>  | 5.878 | <b>0.0007</b> | 0.0000 |                         |     |       |       |    |    |    |   |   |   |   |  |
| uvrA; excinuclease ABC, A subunit                    |               |       |               |        |               |       |               |        |               |       |               |        |               |       |               |        |               |       |               |        |                |       |               |        |                         |     |       |       |    |    |    |   |   |   |   |  |
| <b>SGO_1866</b>                                      |               |       |               |        |               | 2.384 |               |        |               | 3.718 |               |        |               | 1.871 |               |        |               | 2.594 |               |        | 1.334          | 3.687 |               |        |                         |     |       |       |    |    |    |   |   |   |   |  |
| corA; magnesium and cobalt transporter               |               |       |               |        |               |       |               |        |               |       |               |        |               |       |               |        |               |       |               |        |                |       |               |        |                         |     |       |       |    |    |    |   |   |   |   |  |
| <b>SGO_1867</b>                                      | <b>-3.307</b> | 7.508 | <b>0.0003</b> | 0.0003 | <b>-0.785</b> | 8.025 | <b>0.0012</b> | 0.0021 | -0.450        | 8.165 | 0.0084        | 0.0500 | <b>2.522</b>  | 6.302 | <b>0.0002</b> | 0.0001 | <b>2.857</b>  | 5.997 | <b>0.0015</b> | 0.0030 | 0.335          | 7.252 | 0.0477        | 0.1060 |                         |     |       |       |    |    |    |   |   |   |   |  |
| hypothetical protein SGO_1867                        |               |       |               |        |               |       |               |        |               |       |               |        |               |       |               |        |               |       |               |        |                |       |               |        |                         |     |       |       |    |    |    |   |   |   |   |  |
| <b>SGO_1869</b>                                      |               | 6.100 |               |        |               | 6.100 |               |        |               | 6.100 |               |        |               |       |               |        |               |       |               |        |                |       |               |        |                         |     |       |       |    |    |    |   |   |   |   |  |
| hypothetical protein SGO_1869                        |               |       |               |        |               |       |               |        |               |       |               |        |               |       |               |        |               |       |               |        |                |       |               |        |                         |     |       |       |    |    |    |   |   |   |   |  |

Show detected proteins only  
 Show all proteins  
 Filter by category:

Proteins found: 1179

[Dot Plots](#)

[Dot Plots](#)

**Test**      **Cutoff**

| Signif | Direction | Applies To   |
|--------|-----------|--------------|
| yes    | +         | ratios, bars |
| no     | n/a       | bars         |
| yes    | -         | ratios, bars |
| yes    | +         | p-, q-Values |
| yes    | -         | p-, q-Values |

SgFn vs Sg — █ — SgPg vs Sg

SgPgFn vs Sg — █ — SgPg vs SgFn

SgPgFn vs SgFn — █ — SgPgFn vs SgPg



Summary Table SgFn vs Sg SgPg vs Sg SgPgFn vs Sg SgPg v SgFn SgPgFn v SgFn SgPgFn vs SgPg Coverage

| Protein         | SgFn vs Sg                                            |        |        |        | SgPg vs Sg    |       |        |        | SgPgFn vs Sg  |       |        |        | SgPg v SgFn   |        |        |        | SgPgFn v SgFn |        |        |        | SgPgFn vs SgPg |       |        |        | Log <sub>2</sub> Ratios |    |    |   |   |   |   |  |  |
|-----------------|-------------------------------------------------------|--------|--------|--------|---------------|-------|--------|--------|---------------|-------|--------|--------|---------------|--------|--------|--------|---------------|--------|--------|--------|----------------|-------|--------|--------|-------------------------|----|----|---|---|---|---|--|--|
|                 | Ratio                                                 | Sum    | q-Val  | p-Val  | Ratio         | Sum   | q-Val  | p-Val  | Ratio         | Sum   | q-Val  | p-Val  | Ratio         | Sum    | q-Val  | p-Val  | Ratio         | Sum    | q-Val  | p-Val  | Ratio          | Sum   | q-Val  | p-Val  | -6                      | -4 | -2 | 0 | 2 | 4 | 6 |  |  |
| <b>SGO_1870</b> |                                                       | 6.281  |        |        | <b>-2.154</b> | 6.573 | 0.0017 | 0.0036 |               | 6.281 |        |        |               | 3.612  |        |        |               |        |        |        |                | 3.612 |        |        |                         |    |    |   |   |   |   |  |  |
|                 | hypothetical protein SGO_1870                         |        |        |        |               |       |        |        |               |       |        |        |               |        |        |        |               |        |        |        |                |       |        |        |                         |    |    |   |   |   |   |  |  |
| <b>SGO_1871</b> |                                                       | 5.486  |        |        |               | 5.486 |        |        |               | 5.486 |        |        |               |        |        |        |               |        |        |        |                |       |        |        |                         |    |    |   |   |   |   |  |  |
|                 | lipoprotein, putative                                 |        |        |        |               |       |        |        |               |       |        |        |               |        |        |        |               |        |        |        |                |       |        |        |                         |    |    |   |   |   |   |  |  |
| <b>SGO_1872</b> |                                                       | 5.232  |        |        | <b>-2.042</b> | 5.394 | 0.0376 | 0.1612 |               | 5.232 |        |        |               | 1.648  |        |        |               |        |        |        |                | 1.648 |        |        |                         |    |    |   |   |   |   |  |  |
|                 | hypothetical protein SGO_1872                         |        |        |        |               |       |        |        |               |       |        |        |               |        |        |        |               |        |        |        |                |       |        |        |                         |    |    |   |   |   |   |  |  |
| <b>SGO_1878</b> | 0.367                                                 | 4.391  | 0.0261 | 0.1310 |               | 3.674 |        |        |               | 3.674 |        |        |               | 2.525  |        |        |               |        |        |        | 1.914          |       |        |        |                         |    |    |   |   |   |   |  |  |
|                 | transcriptional regulator, TetR family domain protein |        |        |        |               |       |        |        |               |       |        |        |               |        |        |        |               |        |        |        |                |       |        |        |                         |    |    |   |   |   |   |  |  |
| <b>SGO_1879</b> | 0.354                                                 | 7.776  | 0.0886 | 0.5656 | 0.485         | 7.843 | 0.0748 | 0.3573 | 0.700         | 7.966 | 0.0195 | 0.1505 | 0.132         | 7.433  | 0.0562 | 0.3870 | 0.347         | 6.937  | 0.0108 | 0.0460 | 0.215          | 7.603 | 0.0228 | 0.0348 |                         |    |    |   |   |   |   |  |  |
|                 | rpsR; ribosomal protein S18                           |        |        |        |               |       |        |        |               |       |        |        |               |        |        |        |               |        |        |        |                |       |        |        |                         |    |    |   |   |   |   |  |  |
| <b>SGO_1880</b> | <b>-0.115</b>                                         | 7.779  | 0.0501 | 0.2847 | <b>1.077</b>  | 8.471 | 0.0008 | 0.0011 | <b>0.689</b>  | 8.219 | 0.0009 | 0.0027 | <b>1.192</b>  | 7.919  | 0.0004 | 0.0003 | <b>0.803</b>  | 7.049  | 0.0001 | 0.0000 | <b>-0.388</b>  | 8.214 | 0.0069 | 0.0045 |                         |    |    |   |   |   |   |  |  |
|                 | ssb-1; single-strand binding protein                  |        |        |        |               |       |        |        |               |       |        |        |               |        |        |        |               |        |        |        |                |       |        |        |                         |    |    |   |   |   |   |  |  |
| <b>SGO_1881</b> | <b>-0.382</b>                                         | 9.153  | 0.0271 | 0.1376 | <b>0.807</b>  | 9.782 | 0.0045 | 0.0123 | <b>0.575</b>  | 9.632 | 0.0010 | 0.0031 | <b>1.188</b>  | 9.153  | 0.0034 | 0.0109 | <b>0.957</b>  | 8.379  | 0.0031 | 0.0087 | <b>-0.231</b>  | 9.505 | 0.0656 | 0.1618 |                         |    |    |   |   |   |   |  |  |
|                 | rpsF; ribosomal protein S6                            |        |        |        |               |       |        |        |               |       |        |        |               |        |        |        |               |        |        |        |                |       |        |        |                         |    |    |   |   |   |   |  |  |
| <b>SGO_1882</b> | 1.171                                                 | 5.749  | 0.0060 | 0.0204 | <b>1.566</b>  | 6.032 | 0.0038 | 0.0099 | 0.473         | 5.296 | 0.0155 | 0.1125 | 0.395         | 5.908  | 0.0260 | 0.1553 | <b>-0.698</b> | 4.773  | 0.0085 | 0.0331 | <b>-1.092</b>  | 5.641 | 0.0125 | 0.0131 |                         |    |    |   |   |   |   |  |  |
|                 | folE; GTP cyclohydrolase I                            |        |        |        |               |       |        |        |               |       |        |        |               |        |        |        |               |        |        |        |                |       |        |        |                         |    |    |   |   |   |   |  |  |
| <b>SGO_1884</b> |                                                       | 4.239  |        |        |               | 4.239 |        |        |               | 4.239 |        |        |               |        |        |        |               |        |        |        |                |       |        |        |                         |    |    |   |   |   |   |  |  |
|                 | hypothetical protein SGO_1884                         |        |        |        |               |       |        |        |               |       |        |        |               |        |        |        |               |        |        |        |                |       |        |        |                         |    |    |   |   |   |   |  |  |
| <b>SGO_1885</b> | <b>3.284</b>                                          | 12.092 | 0.0000 | 0.0000 | <b>0.544</b>  | 9.965 | 0.0001 | 0.0000 | <b>0.330</b>  | 9.842 | 0.0005 | 0.0013 | <b>-2.739</b> | 11.639 | 0.0000 | 0.0000 | <b>-2.954</b> | 11.002 | 0.0000 | 0.0000 | <b>-0.214</b>  | 9.596 | 0.0050 | 0.0022 |                         |    |    |   |   |   |   |  |  |
|                 | groL; 60 kDa chaperonin/groEL protein                 |        |        |        |               |       |        |        |               |       |        |        |               |        |        |        |               |        |        |        |                |       |        |        |                         |    |    |   |   |   |   |  |  |
| <b>SGO_1886</b> | 1.601                                                 | 7.386  | 0.0137 | 0.0590 | <b>-0.062</b> | 6.280 | 0.1835 | 0.9903 | <b>-0.907</b> | 5.912 | 0.0036 | 0.0171 | <b>-1.663</b> | 6.874  | 0.0125 | 0.0626 | <b>-2.507</b> | 6.104  | 0.0097 | 0.0386 | <b>-0.844</b>  | 5.401 | 0.0466 | 0.1028 |                         |    |    |   |   |   |   |  |  |
|                 | groES; chaperonin, 10 kDa                             |        |        |        |               |       |        |        |               |       |        |        |               |        |        |        |               |        |        |        |                |       |        |        |                         |    |    |   |   |   |   |  |  |
| <b>SGO_1887</b> |                                                       | 4.785  |        |        |               | 4.785 |        |        |               | 4.785 |        |        |               |        |        |        |               |        |        |        |                |       |        |        |                         |    |    |   |   |   |   |  |  |
|                 | ABC transporter, ATP-binding protein                  |        |        |        |               |       |        |        |               |       |        |        |               |        |        |        |               |        |        |        |                |       |        |        |                         |    |    |   |   |   |   |  |  |
| <b>SGO_1888</b> |                                                       | 3.936  |        |        |               | 3.936 |        |        |               | 3.936 |        |        |               |        |        |        |               |        |        |        |                |       |        |        |                         |    |    |   |   |   |   |  |  |
|                 | ABC transporter, permease protein                     |        |        |        |               |       |        |        |               |       |        |        |               |        |        |        |               |        |        |        |                |       |        |        |                         |    |    |   |   |   |   |  |  |
| <b>SGO_1890</b> |                                                       | 4.754  |        |        |               | 4.754 |        |        |               | 4.754 |        |        |               |        |        |        |               |        |        |        |                |       |        |        |                         |    |    |   |   |   |   |  |  |
|                 | PTS system, fructose(mannose)-specific IID            |        |        |        |               |       |        |        |               |       |        |        |               |        |        |        |               |        |        |        |                |       |        |        |                         |    |    |   |   |   |   |  |  |
| <b>SGO_1891</b> |                                                       | 5.077  |        |        |               | 5.077 |        |        |               | 5.077 |        |        |               |        |        |        |               |        |        |        |                |       |        |        |                         |    |    |   |   |   |   |  |  |
|                 | PTS system, IIC component                             |        |        |        |               |       |        |        |               |       |        |        |               |        |        |        |               |        |        |        |                |       |        |        |                         |    |    |   |   |   |   |  |  |
| <b>SGO_1892</b> | <b>2.240</b>                                          | 8.409  | 0.0031 | 0.0089 | <b>-0.655</b> | 6.579 | 0.0076 | 0.0233 | <b>-0.914</b> | 6.496 | 0.0045 | 0.0231 | <b>-2.895</b> | 7.801  | 0.0024 | 0.0068 | <b>-3.155</b> | 7.166  | 0.0025 | 0.0065 | <b>-0.259</b>  | 5.592 | 0.1219 | 0.3717 |                         |    |    |   |   |   |   |  |  |
|                 | PTS system, fructose(mannose)-specific IIB            |        |        |        |               |       |        |        |               |       |        |        |               |        |        |        |               |        |        |        |                |       |        |        |                         |    |    |   |   |   |   |  |  |

Show detected proteins only  
 Show all proteins  
 Filter by category:

Proteins found:  
1179

Dot Plots  
 Dot Plots

**Test**      **Cutoff**

q-Value      **.005**

p-Value      **.005**

| Signif | Direction | Applies To   |
|--------|-----------|--------------|
| yes    | +         | ratios, bars |
| no     | n/a       | bars         |
| yes    | -         | ratios, bars |
| yes    | +         | p-, q-Values |
| yes    | -         | p-, q-Values |

SgFn vs Sg — — SgPg vs Sg  
 SgPgFn vs Sg — — SgPg vs SgFn  
 SgPgFn vs SgFn — — SgPgFn vs SgPg  
 SgPgFn vs SgPg — — SgPgFn vs SgPg

Summary Table SgFn vs Sg SgPg vs Sg SgPgFn vs Sg SgPg v SgFn SgPgFn v SgFn SgPgFn vs SgPg Coverage

| Protein                                                         | SgFn vs Sg |       |        |        | SgPg vs Sg |        |        |        | SgPgFn vs Sg |       |        |        | SgPg v SgFn |       |        |        | SgPgFn v SgFn |       |        |        | SgPgFn vs SgPg |       |        |        | Log <sub>2</sub> Ratios |     |       |       |    |    |    |   |   |   |   |
|-----------------------------------------------------------------|------------|-------|--------|--------|------------|--------|--------|--------|--------------|-------|--------|--------|-------------|-------|--------|--------|---------------|-------|--------|--------|----------------|-------|--------|--------|-------------------------|-----|-------|-------|----|----|----|---|---|---|---|
|                                                                 | Ratio      | Sum   | q-Val  | p-Val  | Ratio      | Sum    | q-Val  | p-Val  | Ratio        | Sum   | q-Val  | p-Val  | Ratio       | Sum   | q-Val  | p-Val  | Ratio         | Sum   | q-Val  | p-Val  | Ratio          | Sum   | q-Val  | p-Val  | Ratio                   | Sum | q-Val | p-Val | -6 | -4 | -2 | 0 | 2 | 4 | 6 |
| SGO_1894                                                        |            | 3.832 |        |        |            | 3.832  |        |        |              | 3.832 |        |        |             |       |        |        |               |       |        |        |                |       |        |        |                         |     |       |       |    |    |    |   |   |   |   |
| sugar-binding cell envelope protein                             |            |       |        |        |            |        |        |        |              |       |        |        |             |       |        |        |               |       |        |        |                |       |        |        |                         |     |       |       |    |    |    |   |   |   |   |
| SGO_1895                                                        |            | 2.202 |        |        |            | 2.202  |        |        |              | 2.202 |        |        |             |       |        |        |               |       |        |        |                |       |        |        |                         |     |       |       |    |    |    |   |   |   |   |
| response regulator                                              |            |       |        |        |            |        |        |        |              |       |        |        |             |       |        |        |               |       |        |        |                |       |        |        |                         |     |       |       |    |    |    |   |   |   |   |
| SGO_1897                                                        |            | 3.776 |        |        |            | 3.776  |        |        |              | 3.776 |        |        |             |       |        |        |               |       |        |        |                |       |        |        |                         |     |       |       |    |    |    |   |   |   |   |
| rbsB; ribose ABC transporter (ribose-binding component) CAC1453 |            |       |        |        |            |        |        |        |              |       |        |        |             |       |        |        |               |       |        |        |                |       |        |        |                         |     |       |       |    |    |    |   |   |   |   |
| SGO_1898                                                        | 2.530      | 9.291 | 0.0004 | 0.0005 | 0.820      | 7.993  | 0.0003 | 0.0002 | 0.145        | 7.601 | 0.0155 | 0.1136 | -1.710      | 8.931 | 0.0007 | 0.0009 | -2.385        | 8.189 | 0.0006 | 0.0006 | -0.675         | 7.534 | 0.0026 | 0.0006 |                         |     |       |       |    |    |    |   |   |   |   |
| glutamyl aminopeptidase                                         |            |       |        |        |            |        |        |        |              |       |        |        |             |       |        |        |               |       |        |        |                |       |        |        |                         |     |       |       |    |    |    |   |   |   |   |
| SGO_1899                                                        |            | 2.700 |        |        |            | 2.700  |        |        |              | 2.700 |        |        |             |       |        |        |               |       |        |        |                |       |        |        |                         |     |       |       |    |    |    |   |   |   |   |
| hypothetical protein SGO_1899                                   |            |       |        |        |            |        |        |        |              |       |        |        |             |       |        |        |               |       |        |        |                |       |        |        |                         |     |       |       |    |    |    |   |   |   |   |
| SGO_1900                                                        |            | 1.322 |        |        | 0.545      | 3.292  | 0.0127 | 0.0442 |              | 1.322 |        |        |             | 2.354 |        |        |               |       |        |        |                | 2.354 |        |        |                         |     |       |       |    |    |    |   |   |   |   |
| thioredoxin family protein                                      |            |       |        |        |            |        |        |        |              |       |        |        |             |       |        |        |               |       |        |        |                |       |        |        |                         |     |       |       |    |    |    |   |   |   |   |
| SGO_1901                                                        | -0.053     | 6.001 | 0.1383 | 0.9288 | 1.151      | 6.682  | 0.0048 | 0.0136 | 0.799        | 6.435 | 0.0009 | 0.0026 | 1.204       | 6.178 | 0.0069 | 0.0283 | 0.852         | 5.322 | 0.0102 | 0.0424 | -0.352         | 6.462 | 0.0503 | 0.1141 |                         |     |       |       |    |    |    |   |   |   |   |
| tRNA binding domain                                             |            |       |        |        |            |        |        |        |              |       |        |        |             |       |        |        |               |       |        |        |                |       |        |        |                         |     |       |       |    |    |    |   |   |   |   |
| SGO_1902                                                        |            | 8.290 |        |        | 1.319      | 10.098 | 0.0015 | 0.0028 | 0.981        | 9.865 | 0.0016 | 0.0059 |             | 9.099 |        |        |               | 8.151 |        |        | -0.339         | 9.940 | 0.0402 | 0.0826 |                         |     |       |       |    |    |    |   |   |   |   |
| ssb; single-stranded DNA-binding protein                        |            |       |        |        |            |        |        |        |              |       |        |        |             |       |        |        |               |       |        |        |                |       |        |        |                         |     |       |       |    |    |    |   |   |   |   |
| SGO_1903                                                        | 0.470      | 8.382 | 0.0109 | 0.0434 | -0.014     | 8.113  | 0.1490 | 0.7754 | 0.042        | 8.146 | 0.0725 | 0.6714 | -0.484      | 7.863 | 0.0087 | 0.0402 | -0.428        | 7.280 | 0.0167 | 0.0781 | 0.056          | 7.626 | 0.1705 | 0.5878 |                         |     |       |       |    |    |    |   |   |   |   |
| ATP-dependent Zn protease                                       |            |       |        |        |            |        |        |        |              |       |        |        |             |       |        |        |               |       |        |        |                |       |        |        |                         |     |       |       |    |    |    |   |   |   |   |
| SGO_1907                                                        |            | 2.170 |        |        |            | 2.170  |        |        |              | 2.170 |        |        |             |       |        |        |               |       |        |        |                |       |        |        |                         |     |       |       |    |    |    |   |   |   |   |
| sensor protein                                                  |            |       |        |        |            |        |        |        |              |       |        |        |             |       |        |        |               |       |        |        |                |       |        |        |                         |     |       |       |    |    |    |   |   |   |   |
| SGO_1912                                                        | 2.439      | 4.026 | 0.0117 | 0.0484 | 1.890      | 4.365  | 0.0007 | 0.0009 |              | 2.189 |        |        | -0.548      | 4.283 | 0.0072 | 0.0301 |               | 2.429 |        |        |                | 3.491 |        |        |                         |     |       |       |    |    |    |   |   |   |   |
| Bifunctional folate synthesis protein                           |            |       |        |        |            |        |        |        |              |       |        |        |             |       |        |        |               |       |        |        |                |       |        |        |                         |     |       |       |    |    |    |   |   |   |   |
| SGO_1914                                                        | 1.677      | 4.472 | 0.0060 | 0.0203 | 0.948      | 3.872  | 0.0322 | 0.1338 | 1.000        | 3.170 |        |        | -0.729      | 4.433 | 0.0011 | 0.0020 | -0.677        | 3.531 | 0.0094 | 0.0372 | 0.052          | 3.628 | 0.2193 | 0.8139 |                         |     |       |       |    |    |    |   |   |   |   |
| folP; dihydropteroate synthase                                  |            |       |        |        |            |        |        |        |              |       |        |        |             |       |        |        |               |       |        |        |                |       |        |        |                         |     |       |       |    |    |    |   |   |   |   |
| SGO_1916                                                        | 0.061      | 8.349 | 0.0764 | 0.4729 | 0.394      | 8.528  | 0.0030 | 0.0074 | 0.287        | 8.469 | 0.0046 | 0.0243 | 0.333       | 8.040 | 0.0002 | 0.0001 | 0.227         | 7.371 | 0.0018 | 0.0041 | -0.106         | 8.144 | 0.0163 | 0.0194 |                         |     |       |       |    |    |    |   |   |   |   |
| ackA; acetate kinase                                            |            |       |        |        |            |        |        |        |              |       |        |        |             |       |        |        |               |       |        |        |                |       |        |        |                         |     |       |       |    |    |    |   |   |   |   |
| SGO_1917                                                        | 0.787      | 5.009 | 0.0052 | 0.0167 | 0.982      | 5.136  | 0.0039 | 0.0104 | 1.025        | 5.153 | 0.0001 | 0.0001 | 0.195       | 4.942 | 0.0506 | 0.3436 | 0.237         | 4.345 | 0.0275 | 0.1467 | 0.042          | 5.049 | 0.2247 | 0.8395 |                         |     |       |       |    |    |    |   |   |   |   |
| hypothetical protein SGO_1917                                   |            |       |        |        |            |        |        |        |              |       |        |        |             |       |        |        |               |       |        |        |                |       |        |        |                         |     |       |       |    |    |    |   |   |   |   |
| SGO_1923                                                        |            | 2.865 |        |        |            | 2.865  |        |        |              | 2.865 |        |        |             |       |        |        |               |       |        |        |                |       |        |        |                         |     |       |       |    |    |    |   |   |   |   |
| comYB; competence protein                                       |            |       |        |        |            |        |        |        |              |       |        |        |             |       |        |        |               |       |        |        |                |       |        |        |                         |     |       |       |    |    |    |   |   |   |   |
| SGO_1924                                                        |            | 8.254 |        |        | -2.018     | 8.576  | 0.0002 | 0.0001 | -2.489       | 8.495 | 0.0001 | 0.0001 |             | 5.740 |        |        |               | 4.667 |        |        | -0.471         | 6.528 | 0.0494 | 0.1109 |                         |     |       |       |    |    |    |   |   |   |   |
| comYA; competence protein comYA                                 |            |       |        |        |            |        |        |        |              |       |        |        |             |       |        |        |               |       |        |        |                |       |        |        |                         |     |       |       |    |    |    |   |   |   |   |

Show detected proteins only  
 Show all proteins

Filter by category:

Proteins found:  
1179

Dot Plots  
Dot Plots

Test Cutoff

q-Value .005

p-Value

| Signif | Direction | Applies To   |
|--------|-----------|--------------|
| yes    | +         | ratios, bars |
| no     | n/a       | bars         |
| yes    | -         | ratios, bars |
| yes    | +         | p-, q-Values |
| yes    | -         | p-, q-Values |

SgFn vs Sg — — SgPg vs Sg  
SgPgFn vs Sg — — SgPg vs SgFn  
SgPgFn vs SgFn — — SgPgFn vs SgPg

Summary Table SgFn vs Sg SgPg vs Sg SgPgFn vs Sg SgPg v SgFn SgPgFn v SgFn SgPgFn vs SgPg Coverage

| Protein                                                                     | SgFn vs Sg |        |        |        | SgPg vs Sg |        |        |        | SgPgFn vs Sg |        |        |        | SgPg v SgFn |       |        |        | SgPgFn v SgFn |       |        |        | SgPgFn vs SgPg |        |        |        | Log <sub>2</sub> Ratios |     |       |       |    |    |    |   |   |   |   |  |
|-----------------------------------------------------------------------------|------------|--------|--------|--------|------------|--------|--------|--------|--------------|--------|--------|--------|-------------|-------|--------|--------|---------------|-------|--------|--------|----------------|--------|--------|--------|-------------------------|-----|-------|-------|----|----|----|---|---|---|---|--|
|                                                                             | Ratio      | Sum    | q-Val  | p-Val  | Ratio      | Sum    | q-Val  | p-Val  | Ratio        | Sum    | q-Val  | p-Val  | Ratio       | Sum   | q-Val  | p-Val  | Ratio         | Sum   | q-Val  | p-Val  | Ratio          | Sum    | q-Val  | p-Val  | Ratio                   | Sum | q-Val | p-Val | -6 | -4 | -2 | 0 | 2 | 4 | 6 |  |
| <b>SGO_1926</b><br>rpoC; DNA-directed RNA polymerase, beta chain            | -0.191     | 10.388 | 0.0027 | 0.0076 | 0.180      | 10.573 | 0.0033 | 0.0081 | 0.220        | 10.594 | 0.0018 | 0.0071 | 0.371       | 9.973 | 0.0006 | 0.0007 | 0.411         | 9.385 | 0.0008 | 0.0009 | 0.039          | 10.167 | 0.0956 | 0.2716 |                         |     |       |       |    |    |    |   |   |   |   |  |
| <b>SGO_1927</b><br>rpoB; DNA-directed RNA polymerase, beta subunit          | -0.581     | 10.200 | 0.0164 | 0.0731 | -0.010     | 10.434 | 0.1496 | 0.7797 | 0.140        | 10.512 | 0.0173 | 0.1287 | 0.571       | 9.680 | 0.0141 | 0.0739 | 0.722         | 9.162 | 0.0101 | 0.0410 | 0.150          | 9.994  | 0.0423 | 0.0883 |                         |     |       |       |    |    |    |   |   |   |   |  |
| <b>SGO_1928</b><br>pbp1b; penicillin-binding protein 1B                     |            | 7.371  |        |        | -2.965     | 7.544  | 0.0003 | 0.0003 | -3.385       | 7.438  | 0.0087 | 0.0531 |             | 3.889 |        |        |               | 1.857 |        |        | -0.421         | 4.347  | 0.0219 | 0.0317 |                         |     |       |       |    |    |    |   |   |   |   |  |
| <b>SGO_1929</b><br>tyrS; tyrosyl-tRNA synthetase                            | -0.009     | 8.729  | 0.1251 | 0.8259 | 1.093      | 9.384  | 0.0010 | 0.0015 | 0.438        | 8.971  | 0.0031 | 0.0143 | 1.102       | 8.867 | 0.0008 | 0.0013 | 0.446         | 7.843 | 0.0035 | 0.0103 | -0.655         | 9.026  | 0.0087 | 0.0065 |                         |     |       |       |    |    |    |   |   |   |   |  |
| <b>SGO_1930</b><br>rrmA; Ribosomal RNA large subunit methyltransferase A    |            | 2.926  |        |        | 1.085      | 4.520  | 0.0051 | 0.0145 |              | 2.926  |        |        |             | 3.426 |        |        |               |       |        |        |                | 3.426  |        |        |                         |     |       |       |    |    |    |   |   |   |   |  |
| <b>SGO_1931</b><br>lipoprotein, putative                                    |            |        |        |        | 1.161      |        |        |        |              |        |        |        |             | 0.648 |        |        |               |       |        |        |                | 0.648  |        |        |                         |     |       |       |    |    |    |   |   |   |   |  |
| <b>SGO_1934</b><br>copper-translocating P-type ATPase                       |            | 5.277  |        |        |            | 5.277  |        |        | -1.691       | 5.485  | 0.0037 | 0.0184 |             |       |        |        |               | 1.461 |        |        |                | 2.072  |        |        |                         |     |       |       |    |    |    |   |   |   |   |  |
| <b>SGO_1935</b><br>negative transcriptional regulator, CopY                 |            | 2.496  |        |        |            | 2.496  |        |        |              | 2.496  |        |        |             |       |        |        |               |       |        |        |                |        |        |        |                         |     |       |       |    |    |    |   |   |   |   |  |
| <b>SGO_1936</b><br>adcA; metal-binding (Mn) permease precursor, lipoprotein | -3.425     | 8.816  | 0.0000 | 0.0000 | -2.189     | 8.974  | 0.0001 | 0.0000 | -2.739       | 8.890  | 0.0001 | 0.0000 | 1.236       | 6.497 | 0.0004 | 0.0004 | 0.686         | 5.528 | 0.0033 | 0.0095 | -0.550         | 6.741  | 0.0107 | 0.0101 |                         |     |       |       |    |    |    |   |   |   |   |  |
| <b>SGO_1938</b><br>adcC; ATP-binding protein, Mn                            |            | 5.090  |        |        | 0.029      | 6.096  | 0.1771 | 0.9448 |              | 5.090  |        |        |             | 4.589 |        |        |               |       |        |        |                | 4.589  |        |        |                         |     |       |       |    |    |    |   |   |   |   |  |
| <b>SGO_1939</b><br>adcR; repressor protein adcR                             |            |        |        |        | 2.321      |        |        |        |              |        |        |        |             | 1.807 |        |        |               |       |        |        |                | 1.807  |        |        |                         |     |       |       |    |    |    |   |   |   |   |  |
| <b>SGO_1957</b><br>hypothetical protein SGO_1957                            | -0.388     | 5.582  | 0.0561 | 0.3268 | -2.186     | 4.917  | 0.0534 | 0.2415 |              | 4.774  |        |        | -1.798      | 4.035 | 0.0345 | 0.2178 |               | 3.236 |        |        |                | 1.000  |        |        |                         |     |       |       |    |    |    |   |   |   |   |  |
| <b>SGO_1958</b><br>rplQ; ribosomal protein L17                              | -1.095     | 8.424  | 0.0024 | 0.0066 | 2.075      | 10.247 | 0.0004 | 0.0003 | 1.594        | 9.873  | 0.0005 | 0.0012 | 3.171       | 9.577 | 0.0002 | 0.0002 | 2.689         | 8.543 | 0.0006 | 0.0004 | -0.481         | 10.205 | 0.0116 | 0.0114 |                         |     |       |       |    |    |    |   |   |   |   |  |
| <b>SGO_1959</b><br>rpoA; DNA-directed RNA polymerase, alpha subunit         | 0.029      | 9.157  | 0.1289 | 0.8527 | 0.482      | 9.402  | 0.0056 | 0.0164 | 0.337        | 9.318  | 0.0063 | 0.0352 | 0.453       | 8.899 | 0.0029 | 0.0089 | 0.308         | 8.205 | 0.0048 | 0.0153 | -0.145         | 9.035  | 0.0322 | 0.0578 |                         |     |       |       |    |    |    |   |   |   |   |  |
| <b>SGO_1960</b><br>rpsK; ribosomal protein S11                              | -0.204     | 7.854  | 0.0710 | 0.4360 | 0.545      | 8.234  | 0.0033 | 0.0080 | 0.585        | 8.257  | 0.0012 | 0.0041 | 0.749       | 7.652 | 0.0050 | 0.0192 | 0.789         | 7.066 | 0.0045 | 0.0141 | 0.040          | 7.986  | 0.1586 | 0.5270 |                         |     |       |       |    |    |    |   |   |   |   |  |
| <b>SGO_1961</b><br>rpsM; ribosomal protein S13p/S18e                        | -1.173     | 8.386  | 0.0006 | 0.0010 | 1.499      | 9.790  | 0.0003 | 0.0003 | 0.380        | 9.056  | 0.0015 | 0.0056 | 2.673       | 9.052 | 0.0002 | 0.0001 | 1.553         | 7.536 | 0.0006 | 0.0004 | -1.119         | 9.386  | 0.0026 | 0.0006 |                         |     |       |       |    |    |    |   |   |   |   |  |

Show detected proteins only  
 Show all proteins

Filter by category:  
ABC Transporter

Proteins found:  
1179

Dot Plots  
Dot Plots

Test

Cutoff

q-Value

p-Value

.005

| Signif | Direction | Applies To   |
|--------|-----------|--------------|
| yes    | +         | ratios, bars |
| no     | n/a       | bars         |
| yes    | -         | ratios, bars |
| yes    | +         | p-, q-Values |
| yes    | -         | p-, q-Values |

SgFn vs Sg — — SgPg vs Sg  
SgPgFn vs Sg — — SgPg vs SgFn  
SgPgFn vs SgFn — — SgPgFn vs SgPg

Summary Table SgFn vs Sg SgPg vs Sg SgPgFn vs Sg SgPg v SgFn SgPgFn v SgFn SgPgFn vs SgPg Coverage

| Protein                                            | SgFn vs Sg |       |        |        | SgPg vs Sg |        |        |        | SgPgFn vs Sg |        |        |        | SgPg v SgFn |        |        |        | SgPgFn v SgFn |       |        |        | SgPgFn vs SgPg |        |        |        | Log <sub>2</sub> Ratios |     |       |       |    |    |    |   |   |   |   |  |
|----------------------------------------------------|------------|-------|--------|--------|------------|--------|--------|--------|--------------|--------|--------|--------|-------------|--------|--------|--------|---------------|-------|--------|--------|----------------|--------|--------|--------|-------------------------|-----|-------|-------|----|----|----|---|---|---|---|--|
|                                                    | Ratio      | Sum   | q-Val  | p-Val  | Ratio      | Sum    | q-Val  | p-Val  | Ratio        | Sum    | q-Val  | p-Val  | Ratio       | Sum    | q-Val  | p-Val  | Ratio         | Sum   | q-Val  | p-Val  | Ratio          | Sum    | q-Val  | p-Val  | Ratio                   | Sum | q-Val | p-Val | -6 | -4 | -2 | 0 | 2 | 4 | 6 |  |
| <b>SGO_1962</b>                                    |            |       |        |        |            | 5.444  |        |        |              | 5.204  |        |        |             | 4.930  |        |        |               | 4.080 |        |        | 0.805          | 5.815  | 0.0818 | 0.2172 |                         |     |       |       |    |    |    |   |   |   |   |  |
| rpmJ; ribosomal protein L36                        |            |       |        |        |            |        |        |        |              |        |        |        |             |        |        |        |               |       |        |        |                |        |        |        |                         |     |       |       |    |    |    |   |   |   |   |  |
| <b>SGO_1964</b>                                    | -0.394     | 8.593 | 0.0246 | 0.1193 | 0.047      | 8.784  | 0.0231 | 0.0918 | 0.431        | 8.993  | 0.0013 | 0.0045 | 0.441       | 8.106  | 0.0161 | 0.0875 | 0.825         | 7.728 | 0.0045 | 0.0139 | 0.384          | 8.500  | 0.0076 | 0.0054 |                         |     |       |       |    |    |    |   |   |   |   |  |
| adk; Adenylate kinase (ATP-AMP transphosphorylase) |            |       |        |        |            |        |        |        |              |        |        |        |             |        |        |        |               |       |        |        |                |        |        |        |                         |     |       |       |    |    |    |   |   |   |   |  |
| <b>SGO_1965</b>                                    |            | 6.268 |        |        | -1.375     | 6.740  | 0.0004 | 0.0005 | -1.253       | 6.773  | 0.0003 | 0.0003 |             | 4.386  |        |        |               | 3.889 |        |        | 0.121          | 5.444  | 0.0928 | 0.2595 |                         |     |       |       |    |    |    |   |   |   |   |  |
| Preprotein translocase secY subunit                |            |       |        |        |            |        |        |        |              |        |        |        |             |        |        |        |               |       |        |        |                |        |        |        |                         |     |       |       |    |    |    |   |   |   |   |  |
| <b>SGO_1966</b>                                    | 0.711      | 8.581 | 0.0250 | 0.1218 | 1.359      | 8.989  | 0.0068 | 0.0207 | 1.278        | 8.907  | 0.0009 | 0.0028 | 0.648       | 8.744  | 0.0282 | 0.1723 | 0.567         | 8.065 | 0.0299 | 0.1641 | -0.081         | 8.956  | 0.1835 | 0.6466 |                         |     |       |       |    |    |    |   |   |   |   |  |
| rplO; ribosomal protein L15                        |            |       |        |        |            |        |        |        |              |        |        |        |             |        |        |        |               |       |        |        |                |        |        |        |                         |     |       |       |    |    |    |   |   |   |   |  |
| <b>SGO_1967</b>                                    | -0.238     | 7.392 | 0.0767 | 0.4756 | 1.872      | 8.702  | 0.0003 | 0.0002 | 0.975        | 8.055  | 0.0016 | 0.0058 | 2.111       | 8.152  | 0.0006 | 0.0007 | 1.214         | 6.873 | 0.0039 | 0.0118 | -0.897         | 8.463  | 0.0054 | 0.0028 |                         |     |       |       |    |    |    |   |   |   |   |  |
| 50S ribosomal protein L30 -related protein         |            |       |        |        |            |        |        |        |              |        |        |        |             |        |        |        |               |       |        |        |                |        |        |        |                         |     |       |       |    |    |    |   |   |   |   |  |
| <b>SGO_1968</b>                                    | -0.621     | 9.665 | 0.0078 | 0.0289 | 0.640      | 10.290 | 0.0024 | 0.0053 | 0.201        | 10.039 | 0.0195 | 0.1505 | 1.261       | 9.565  | 0.0006 | 0.0007 | 0.822         | 8.659 | 0.0017 | 0.0037 | -0.439         | 9.855  | 0.0048 | 0.0017 |                         |     |       |       |    |    |    |   |   |   |   |  |
| rpsE; ribosomal protein S5                         |            |       |        |        |            |        |        |        |              |        |        |        |             |        |        |        |               |       |        |        |                |        |        |        |                         |     |       |       |    |    |    |   |   |   |   |  |
| <b>SGO_1969</b>                                    | -0.461     | 9.203 | 0.0251 | 0.1230 | 1.259      | 10.158 | 0.0003 | 0.0003 | 1.285        | 10.176 | 0.0002 | 0.0003 | 1.721       | 9.530  | 0.0005 | 0.0005 | 1.746         | 8.939 | 0.0006 | 0.0005 | 0.025          | 10.151 | 0.0183 | 0.0240 |                         |     |       |       |    |    |    |   |   |   |   |  |
| rplR; ribosomal protein L18                        |            |       |        |        |            |        |        |        |              |        |        |        |             |        |        |        |               |       |        |        |                |        |        |        |                         |     |       |       |    |    |    |   |   |   |   |  |
| <b>SGO_1970</b>                                    | -1.812     | 9.837 | 0.0001 | 0.0001 | -0.442     | 10.269 | 0.0004 | 0.0004 | -0.307       | 10.335 | 0.0120 | 0.0805 | 1.370       | 8.992  | 0.0003 | 0.0002 | 1.504         | 8.491 | 0.0022 | 0.0051 | 0.135          | 9.595  | 0.1111 | 0.3304 |                         |     |       |       |    |    |    |   |   |   |   |  |
| BL10; 50S ribosomal protein L6                     |            |       |        |        |            |        |        |        |              |        |        |        |             |        |        |        |               |       |        |        |                |        |        |        |                         |     |       |       |    |    |    |   |   |   |   |  |
| <b>SGO_1971</b>                                    | -0.883     | 9.958 | 0.0005 | 0.0007 | 0.875      | 10.836 | 0.0004 | 0.0005 | 1.268        | 11.111 | 0.0015 | 0.0056 | 1.758       | 10.068 | 0.0002 | 0.0001 | 2.151         | 9.780 | 0.0014 | 0.0024 | 0.393          | 10.912 | 0.0327 | 0.0590 |                         |     |       |       |    |    |    |   |   |   |   |  |
| rpsH; ribosomal protein S8                         |            |       |        |        |            |        |        |        |              |        |        |        |             |        |        |        |               |       |        |        |                |        |        |        |                         |     |       |       |    |    |    |   |   |   |   |  |
| <b>SGO_1972</b>                                    |            | 5.340 |        |        |            | 5.340  |        |        |              | 5.340  |        |        |             |        |        |        |               |       |        |        |                |        |        |        |                         |     |       |       |    |    |    |   |   |   |   |  |
| rpsN; ribosomal protein S14p/S29e                  |            |       |        |        |            |        |        |        |              |        |        |        |             |        |        |        |               |       |        |        |                |        |        |        |                         |     |       |       |    |    |    |   |   |   |   |  |
| <b>SGO_1973</b>                                    | -0.823     | 9.445 | 0.0007 | 0.0011 | 0.314      | 9.963  | 0.0026 | 0.0060 | 0.582        | 10.121 | 0.0019 | 0.0079 | 1.138       | 9.139  | 0.0002 | 0.0001 | 1.406         | 8.721 | 0.0009 | 0.0011 | 0.268          | 9.741  | 0.0248 | 0.0399 |                         |     |       |       |    |    |    |   |   |   |   |  |
| BL6; 50S ribosomal protein L5                      |            |       |        |        |            |        |        |        |              |        |        |        |             |        |        |        |               |       |        |        |                |        |        |        |                         |     |       |       |    |    |    |   |   |   |   |  |
| <b>SGO_1974</b>                                    | -1.058     | 8.620 | 0.0046 | 0.0142 | -0.172     | 8.962  | 0.0595 | 0.2735 | 0.659        | 9.413  | 0.0039 | 0.0194 | 0.886       | 7.983  | 0.0021 | 0.0053 | 1.717         | 7.964 | 0.0011 | 0.0016 | 0.831          | 8.830  | 0.0071 | 0.0046 |                         |     |       |       |    |    |    |   |   |   |   |  |
| rplX; ribosomal protein L24                        |            |       |        |        |            |        |        |        |              |        |        |        |             |        |        |        |               |       |        |        |                |        |        |        |                         |     |       |       |    |    |    |   |   |   |   |  |
| <b>SGO_1975</b>                                    | -0.135     | 8.279 | 0.0814 | 0.5114 | 0.740      | 8.750  | 0.0003 | 0.0003 | 1.293        | 9.123  | 0.0005 | 0.0012 | 0.875       | 8.196  | 0.0021 | 0.0051 | 1.428         | 7.967 | 0.0013 | 0.0021 | 0.553          | 8.865  | 0.0092 | 0.0073 |                         |     |       |       |    |    |    |   |   |   |   |  |
| rplN; ribosomal protein L14                        |            |       |        |        |            |        |        |        |              |        |        |        |             |        |        |        |               |       |        |        |                |        |        |        |                         |     |       |       |    |    |    |   |   |   |   |  |
| <b>SGO_1976</b>                                    | 0.116      | 7.182 | 0.1315 | 0.8772 | 2.575      | 8.892  | 0.0008 | 0.0012 | 1.712        | 8.214  | 0.0030 | 0.0137 | 2.459       | 8.387  | 0.0007 | 0.0009 | 1.596         | 7.102 | 0.0038 | 0.0111 | -0.862         | 8.785  | 0.0140 | 0.0153 |                         |     |       |       |    |    |    |   |   |   |   |  |
| BS16; 30S ribosomal protein                        |            |       |        |        |            |        |        |        |              |        |        |        |             |        |        |        |               |       |        |        |                |        |        |        |                         |     |       |       |    |    |    |   |   |   |   |  |
| <b>SGO_1977</b>                                    | -0.463     | 5.951 | 0.0523 | 0.2993 | 0.014      | 6.513  | 0.1779 | 0.9553 | 0.375        | 6.717  | 0.0222 | 0.1763 | 0.476       | 5.445  | 0.0390 | 0.2551 | 0.837         | 5.125 | 0.0457 | 0.2725 | 0.361          | 6.208  | 0.0684 | 0.1734 |                         |     |       |       |    |    |    |   |   |   |   |  |
| rpmC; ribosomal protein L29                        |            |       |        |        |            |        |        |        |              |        |        |        |             |        |        |        |               |       |        |        |                |        |        |        |                         |     |       |       |    |    |    |   |   |   |   |  |
| <b>SGO_1978</b>                                    | -0.239     | 7.841 | 0.0607 | 0.3602 | 1.442      | 8.829  | 0.0015 | 0.0028 | 0.912        | 8.468  | 0.0040 | 0.0201 | 1.680       | 8.238  | 0.0001 | 0.0000 | 1.151         | 7.242 | 0.0002 | 0.0001 | -0.529         | 8.605  | 0.0007 | 0.0000 |                         |     |       |       |    |    |    |   |   |   |   |  |
| rplP; ribosomal protein L16                        |            |       |        |        |            |        |        |        |              |        |        |        |             |        |        |        |               |       |        |        |                |        |        |        |                         |     |       |       |    |    |    |   |   |   |   |  |

Show detected proteins only  
 Show all proteins

Proteins found:  
1179

Dot Plots  
Dot Plots

Test

Cutoff

q-Value

p-Value

.005

| Signif | Direction | Applies To   |
|--------|-----------|--------------|
| yes    | +         | ratios, bars |
| no     | n/a       | bars         |
| yes    | -         | ratios, bars |
| yes    | +         | p-, q-Values |
| yes    | -         | p-, q-Values |

SgFn vs Sg —  
SgPgFn vs Sg —  
SgPgFn vs SgFn —  
SgPg vs SgPg —  
SgPg vs SgFn —  
SgPgFn vs SgPg —

Summary Table SgFn vs Sg SgPg vs Sg SgPgFn vs Sg SgPg v SgFn SgPgFn v SgFn SgPgFn vs SgPg Coverage

| Protein                                                          | SgFn vs Sg |        |        |        | SgPg vs Sg |        |        |        | SgPgFn vs Sg |        |        |        | SgPg v SgFn |       |        |        | SgPgFn v SgFn |       |        |        | SgPgFn vs SgPg |        |        |        | Log <sub>2</sub> Ratios |     |       |       |    |    |    |   |   |   |   |  |
|------------------------------------------------------------------|------------|--------|--------|--------|------------|--------|--------|--------|--------------|--------|--------|--------|-------------|-------|--------|--------|---------------|-------|--------|--------|----------------|--------|--------|--------|-------------------------|-----|-------|-------|----|----|----|---|---|---|---|--|
|                                                                  | Ratio      | Sum    | q-Val  | p-Val  | Ratio      | Sum    | q-Val  | p-Val  | Ratio        | Sum    | q-Val  | p-Val  | Ratio       | Sum   | q-Val  | p-Val  | Ratio         | Sum   | q-Val  | p-Val  | Ratio          | Sum    | q-Val  | p-Val  | Ratio                   | Sum | q-Val | p-Val | -6 | -4 | -2 | 0 | 2 | 4 | 6 |  |
| SGO_1979                                                         | -1.001     | 10.336 | 0.0006 | 0.0010 | -0.999     | 10.334 | 0.0003 | 0.0002 | -0.865       | 10.382 | 0.0004 | 0.0010 | 0.002       | 9.240 | 0.1243 | 0.9528 | 0.136         | 8.699 | 0.0521 | 0.3237 | 0.134          | 9.307  | 0.0661 | 0.1645 |                         |     |       |       |    |    |    |   |   |   |   |  |
| rpsC; ribosomal protein S3                                       |            |        |        |        |            |        |        |        |              |        |        |        |             |       |        |        |               |       |        |        |                |        |        |        |                         |     |       |       |    |    |    |   |   |   |   |  |
| SGO_1980                                                         | -0.272     | 8.907  | 0.0105 | 0.0417 | 0.869      | 9.533  | 0.0003 | 0.0003 | 1.192        | 9.751  | 0.0003 | 0.0005 | 1.141       | 8.930 | 0.0002 | 0.0002 | 1.464         | 8.550 | 0.0005 | 0.0003 | 0.323          | 9.561  | 0.0094 | 0.0076 |                         |     |       |       |    |    |    |   |   |   |   |  |
| rplV; ribosomal protein L22                                      |            |        |        |        |            |        |        |        |              |        |        |        |             |       |        |        |               |       |        |        |                |        |        |        |                         |     |       |       |    |    |    |   |   |   |   |  |
| SGO_1981                                                         | -0.372     | 9.339  | 0.0070 | 0.0251 | -0.198     | 9.418  | 0.0320 | 0.1328 | -0.058       | 9.485  | 0.0642 | 0.5800 | 0.174       | 8.715 | 0.0107 | 0.0510 | 0.314         | 8.180 | 0.0049 | 0.0163 | 0.140          | 8.873  | 0.0680 | 0.1722 |                         |     |       |       |    |    |    |   |   |   |   |  |
| rpsS; ribosomal protein S19                                      |            |        |        |        |            |        |        |        |              |        |        |        |             |       |        |        |               |       |        |        |                |        |        |        |                         |     |       |       |    |    |    |   |   |   |   |  |
| SGO_1982                                                         | 0.174      | 9.007  | 0.0740 | 0.4556 | 0.327      | 9.069  | 0.0196 | 0.0760 | 0.562        | 9.205  | 0.0042 | 0.0214 | 0.153       | 8.650 | 0.0843 | 0.6166 | 0.388         | 8.167 | 0.0310 | 0.1712 | 0.235          | 8.829  | 0.0419 | 0.0871 |                         |     |       |       |    |    |    |   |   |   |   |  |
| rplB; ribosomal protein L2                                       |            |        |        |        |            |        |        |        |              |        |        |        |             |       |        |        |               |       |        |        |                |        |        |        |                         |     |       |       |    |    |    |   |   |   |   |  |
| SGO_1983                                                         | -1.445     | 8.527  | 0.0028 | 0.0079 | -0.214     | 8.948  | 0.0580 | 0.2650 | -0.221       | 8.939  | 0.0161 | 0.1179 | 1.231       | 7.880 | 0.0079 | 0.0346 | 1.224         | 7.256 | 0.0069 | 0.0248 | -0.007         | 8.326  | 0.2399 | 0.9214 |                         |     |       |       |    |    |    |   |   |   |   |  |
| rplW; ribosomal protein L23                                      |            |        |        |        |            |        |        |        |              |        |        |        |             |       |        |        |               |       |        |        |                |        |        |        |                         |     |       |       |    |    |    |   |   |   |   |  |
| SGO_1984                                                         | 0.348      | 9.327  | 0.0089 | 0.0341 | 0.821      | 9.611  | 0.0017 | 0.0035 | 1.443        | 10.038 | 0.0004 | 0.0009 | 0.473       | 9.229 | 0.0014 | 0.0030 | 1.096         | 9.013 | 0.0008 | 0.0008 | 0.622          | 9.793  | 0.0066 | 0.0041 |                         |     |       |       |    |    |    |   |   |   |   |  |
| rplD; ribosomal protein L4/L1 family                             |            |        |        |        |            |        |        |        |              |        |        |        |             |       |        |        |               |       |        |        |                |        |        |        |                         |     |       |       |    |    |    |   |   |   |   |  |
| SGO_1985                                                         | 1.375      | 9.340  | 0.0021 | 0.0053 | 2.375      | 10.178 | 0.0072 | 0.0217 | 2.068        | 9.860  | 0.0001 | 0.0000 | 0.999       | 9.986 | 0.0136 | 0.0706 | 0.693         | 9.127 | 0.0024 | 0.0061 | -0.307         | 10.243 | 0.1025 | 0.2963 |                         |     |       |       |    |    |    |   |   |   |   |  |
| rplC; ribosomal protein L3                                       |            |        |        |        |            |        |        |        |              |        |        |        |             |       |        |        |               |       |        |        |                |        |        |        |                         |     |       |       |    |    |    |   |   |   |   |  |
| SGO_1986                                                         | -0.327     | 7.486  | 0.0238 | 0.1144 | 0.450      | 7.881  | 0.0131 | 0.0458 | 0.996        | 8.217  | 0.0008 | 0.0022 | 0.777       | 7.231 | 0.0011 | 0.0020 | 1.323         | 6.986 | 0.0002 | 0.0001 | 0.546          | 7.865  | 0.0050 | 0.0018 |                         |     |       |       |    |    |    |   |   |   |   |  |
| rpsJ; ribosomal protein S10                                      |            |        |        |        |            |        |        |        |              |        |        |        |             |       |        |        |               |       |        |        |                |        |        |        |                         |     |       |       |    |    |    |   |   |   |   |  |
| SGO_1988                                                         | 1.168      | 5.598  | 0.0404 | 0.2208 |            | 4.572  |        |        |              | 4.572  |        |        |             | 4.110 |        |        |               | 3.499 |        |        |                |        |        |        |                         |     |       |       |    |    |    |   |   |   |   |  |
| hydrolase, haloacid dehalogenase-like family                     |            |        |        |        |            |        |        |        |              |        |        |        |             |       |        |        |               |       |        |        |                |        |        |        |                         |     |       |       |    |    |    |   |   |   |   |  |
| SGO_1989                                                         | 0.601      | 9.267  | 0.0015 | 0.0034 | 1.403      | 9.800  | 0.0003 | 0.0002 | 1.422        | 9.815  | 0.0003 | 0.0004 | 0.802       | 9.478 | 0.0007 | 0.0008 | 0.821         | 8.880 | 0.0010 | 0.0013 | 0.019          | 9.834  | 0.2083 | 0.7590 |                         |     |       |       |    |    |    |   |   |   |   |  |
| purA; adenylosuccinate synthetase                                |            |        |        |        |            |        |        |        |              |        |        |        |             |       |        |        |               |       |        |        |                |        |        |        |                         |     |       |       |    |    |    |   |   |   |   |  |
| SGO_1990                                                         | 3.661      | 6.835  | 0.0005 | 0.0008 | 1.608      | 5.146  | 0.0122 | 0.0419 | 1.153        | 4.157  | 0.0196 | 0.1515 | -2.053      | 6.535 | 0.0013 | 0.0027 | -2.509        | 5.718 | 0.0181 | 0.0858 | -0.456         | 4.657  | 0.1579 | 0.5196 |                         |     |       |       |    |    |    |   |   |   |   |  |
| glutamate--cysteine ligase, putative/amino acid ligase, putative |            |        |        |        |            |        |        |        |              |        |        |        |             |       |        |        |               |       |        |        |                |        |        |        |                         |     |       |       |    |    |    |   |   |   |   |  |
| SGO_1991                                                         | 2.067      | 6.131  | 0.0009 | 0.0016 | -0.388     | 4.635  | 0.0674 | 0.3156 |              | 3.874  |        |        | -2.454      | 5.522 | 0.0001 | 0.0000 |               | 4.668 |        |        |                | 2.835  |        |        |                         |     |       |       |    |    |    |   |   |   |   |  |
| hslO; 33 kDa chaperonin /Heat shock protein 33-like protein      |            |        |        |        |            |        |        |        |              |        |        |        |             |       |        |        |               |       |        |        |                |        |        |        |                         |     |       |       |    |    |    |   |   |   |   |  |
| SGO_1993                                                         | -1.499     | 6.875  | 0.0024 | 0.0063 | -0.453     | 7.226  | 0.0175 | 0.0657 | -0.658       | 7.153  | 0.0087 | 0.0534 | 1.046       | 6.030 | 0.0009 | 0.0014 | 0.841         | 5.299 | 0.0076 | 0.0285 | -0.205         | 6.372  | 0.1151 | 0.3438 |                         |     |       |       |    |    |    |   |   |   |   |  |
| possible transcriptional regulator                               |            |        |        |        |            |        |        |        |              |        |        |        |             |       |        |        |               |       |        |        |                |        |        |        |                         |     |       |       |    |    |    |   |   |   |   |  |
| SGO_1994                                                         |            | 1.379  |        |        |            | 1.380  |        |        |              | 1.380  |        |        |             |       |        |        |               |       |        |        |                |        |        |        |                         |     |       |       |    |    |    |   |   |   |   |  |
| lipoprotein, putative                                            |            |        |        |        |            |        |        |        |              |        |        |        |             |       |        |        |               |       |        |        |                |        |        |        |                         |     |       |       |    |    |    |   |   |   |   |  |
| SGO_1995                                                         | 0.615      | 5.975  | 0.0425 | 0.2374 |            | 4.654  |        |        | -0.155       | 5.158  | 0.0782 | 0.7315 |             | 4.724 |        |        | -0.770        | 4.468 | 0.0601 | 0.3863 |                | 2.883  |        |        |                         |     |       |       |    |    |    |   |   |   |   |  |
| MutT/nudix family protein                                        |            |        |        |        |            |        |        |        |              |        |        |        |             |       |        |        |               |       |        |        |                |        |        |        |                         |     |       |       |    |    |    |   |   |   |   |  |
| SGO_1998                                                         | -0.114     | 7.258  | 0.0299 | 0.1545 | -0.061     | 7.292  | 0.1442 | 0.7455 | -0.905       | 6.939  | 0.0016 | 0.0059 | 0.053       | 6.720 | 0.0848 | 0.6222 | -0.791        | 5.739 | 0.0021 | 0.0049 | -0.844         | 6.394  | 0.0172 | 0.0218 |                         |     |       |       |    |    |    |   |   |   |   |  |
| clpB; ATP-dependent Clp proteinase, ATP-binding chain            |            |        |        |        |            |        |        |        |              |        |        |        |             |       |        |        |               |       |        |        |                |        |        |        |                         |     |       |       |    |    |    |   |   |   |   |  |

Show detected proteins only  
 Show all proteins

Proteins found:  
1179

Dot Plots  
Dot Plots

Test

Cutoff

q-Value

p-Value

.005

| Signif | Direction | Applies To   |
|--------|-----------|--------------|
| yes    | +         | ratios, bars |
| no     | n/a       | bars         |
| yes    | -         | ratios, bars |
| yes    | +         | p-, q-Values |
| yes    | -         | p-, q-Values |

SgFn vs Sg —  
SgPgFn vs Sg —  
SgPgFn vs SgFn —  
SgPg vs SgPg —  
SgPg vs SgFn —  
SgPgFn vs SgPg —

Summary Table SgFn vs Sg SgPg vs Sg SgPgFn vs Sg SgPg v SgFn SgPgFn v SgFn SgPgFn vs SgPg Coverage

| Protein                                                     | SgFn vs Sg |        |        |        | SgPg vs Sg |        |        |        | SgPgFn vs Sg |        |        |        | SgPg v SgFn |        |        |        | SgPgFn v SgFn |        |        |        | SgPgFn vs SgPg |        |        |        | Log <sub>2</sub> Ratios |     |       |       |    |    |    |   |   |   |   |  |
|-------------------------------------------------------------|------------|--------|--------|--------|------------|--------|--------|--------|--------------|--------|--------|--------|-------------|--------|--------|--------|---------------|--------|--------|--------|----------------|--------|--------|--------|-------------------------|-----|-------|-------|----|----|----|---|---|---|---|--|
|                                                             | Ratio      | Sum    | q-Val  | p-Val  | Ratio      | Sum    | q-Val  | p-Val  | Ratio        | Sum    | q-Val  | p-Val  | Ratio       | Sum    | q-Val  | p-Val  | Ratio         | Sum    | q-Val  | p-Val  | Ratio          | Sum    | q-Val  | p-Val  | Ratio                   | Sum | q-Val | p-Val | -6 | -4 | -2 | 0 | 2 | 4 | 6 |  |
| SGO_2000                                                    | 0.216      | 10.871 | 0.0174 | 0.0778 | 0.557      | 11.062 | 0.0011 | 0.0018 | 0.572        | 11.072 | 0.0014 | 0.0052 | 0.341       | 10.640 | 0.0032 | 0.0103 | 0.356         | 10.040 | 0.0060 | 0.0208 | 0.015          | 10.808 | 0.2122 | 0.7760 |                         |     |       |       |    |    |    |   |   |   |   |  |
| tsf; translation elongation factor Ts                       |            |        |        |        |            |        |        |        |              |        |        |        |             |        |        |        |               |        |        |        |                |        |        |        |                         |     |       |       |    |    |    |   |   |   |   |  |
| SGO_2001                                                    | -0.063     | 10.783 | 0.0858 | 0.5436 | 0.163      | 10.895 | 0.0136 | 0.0480 | 0.252        | 10.944 | 0.0063 | 0.0353 | 0.226       | 10.354 | 0.0122 | 0.0605 | 0.316         | 9.794  | 0.0097 | 0.0386 | 0.089          | 10.507 | 0.0813 | 0.2151 |                         |     |       |       |    |    |    |   |   |   |   |  |
| rpsB; ribosomal protein S2                                  |            |        |        |        |            |        |        |        |              |        |        |        |             |        |        |        |               |        |        |        |                |        |        |        |                         |     |       |       |    |    |    |   |   |   |   |  |
| SGO_2004                                                    | -2.079     | 7.088  | 0.0011 | 0.0023 |            | 6.780  |        |        |              | 6.780  |        |        |             | 4.196  |        |        |               | 3.585  |        |        |                |        |        |        |                         |     |       |       |    |    |    |   |   |   |   |  |
| LPXTG cell wall surface protein                             |            |        |        |        |            |        |        |        |              |        |        |        |             |        |        |        |               |        |        |        |                |        |        |        |                         |     |       |       |    |    |    |   |   |   |   |  |
| SGO_2005                                                    | -5.995     | 9.561  | 0.0089 | 0.0340 | -4.964     | 9.595  | 0.0002 | 0.0001 | -4.242       | 9.625  | 0.0001 | 0.0001 | 1.031       | 4.389  | 0.0158 | 0.0855 | 1.753         | 4.401  | 0.0290 | 0.1574 | 0.722          | 5.492  | 0.0219 | 0.0321 |                         |     |       |       |    |    |    |   |   |   |   |  |
| LPXTG cell wall surface protein                             |            |        |        |        |            |        |        |        |              |        |        |        |             |        |        |        |               |        |        |        |                |        |        |        |                         |     |       |       |    |    |    |   |   |   |   |  |
| SGO_2006                                                    |            | 3.279  |        |        |            | 3.279  |        |        |              | 3.279  |        |        |             |        |        |        |               |        |        |        |                |        |        |        |                         |     |       |       |    |    |    |   |   |   |   |  |
| thioredoxin signature protein                               |            |        |        |        |            |        |        |        |              |        |        |        |             |        |        |        |               |        |        |        |                |        |        |        |                         |     |       |       |    |    |    |   |   |   |   |  |
| SGO_2007                                                    | 0.413      | 7.410  | 0.0001 | 0.0001 | -0.015     | 7.182  | 0.1504 | 0.7846 | 0.048        | 7.214  | 0.0366 | 0.3079 | -0.429      | 6.891  | 0.0009 | 0.0016 | -0.365        | 6.308  | 0.0012 | 0.0019 | 0.063          | 6.694  | 0.1174 | 0.3566 |                         |     |       |       |    |    |    |   |   |   |   |  |
| nusG; transcription termination/antitermination factor NusG |            |        |        |        |            |        |        |        |              |        |        |        |             |        |        |        |               |        |        |        |                |        |        |        |                         |     |       |       |    |    |    |   |   |   |   |  |
| SGO_2008                                                    |            | 5.872  |        |        |            | 5.872  |        |        |              | 5.872  |        |        |             |        |        |        |               |        |        |        |                |        |        |        |                         |     |       |       |    |    |    |   |   |   |   |  |
| preprotein translocase secE component -related protein      |            |        |        |        |            |        |        |        |              |        |        |        |             |        |        |        |               |        |        |        |                |        |        |        |                         |     |       |       |    |    |    |   |   |   |   |  |
| SGO_2010                                                    | -1.834     | 6.616  | 0.0002 | 0.0002 |            | 6.259  |        |        |              | 6.259  |        |        |             | 3.916  |        |        |               | 3.305  |        |        |                |        |        |        |                         |     |       |       |    |    |    |   |   |   |   |  |
| pbp2a; penicillin-binding protein 2A                        |            |        |        |        |            |        |        |        |              |        |        |        |             |        |        |        |               |        |        |        |                |        |        |        |                         |     |       |       |    |    |    |   |   |   |   |  |
| SGO_2013                                                    | -5.238     | 9.019  | 0.0000 | 0.0000 |            | 8.980  |        |        |              | 8.980  |        |        |             | 3.259  |        |        |               | 2.648  |        |        |                |        |        |        |                         |     |       |       |    |    |    |   |   |   |   |  |
| putative N-acetylmuramidase/lysin                           |            |        |        |        |            |        |        |        |              |        |        |        |             |        |        |        |               |        |        |        |                |        |        |        |                         |     |       |       |    |    |    |   |   |   |   |  |
| SGO_2015                                                    |            | 0.585  |        |        |            | 0.585  |        |        |              | 0.585  |        |        |             |        |        |        |               |        |        |        |                |        |        |        |                         |     |       |       |    |    |    |   |   |   |   |  |
| possible polysaccharide transport protein                   |            |        |        |        |            |        |        |        |              |        |        |        |             |        |        |        |               |        |        |        |                |        |        |        |                         |     |       |       |    |    |    |   |   |   |   |  |
| SGO_2016                                                    |            | 2.170  |        |        |            | 2.170  |        |        |              | 2.170  |        |        |             |        |        |        |               |        |        |        |                |        |        |        |                         |     |       |       |    |    |    |   |   |   |   |  |
| nucleotide sugar dehydratase, putative                      |            |        |        |        |            |        |        |        |              |        |        |        |             |        |        |        |               |        |        |        |                |        |        |        |                         |     |       |       |    |    |    |   |   |   |   |  |
| SGO_2017                                                    |            | 2.700  |        |        | -0.539     | 3.456  |        |        |              | 2.700  |        |        |             | 1.648  |        |        |               |        |        |        |                | 1.648  |        |        |                         |     |       |       |    |    |    |   |   |   |   |  |
| nucleotidyl transferase, putative                           |            |        |        |        |            |        |        |        |              |        |        |        |             |        |        |        |               |        |        |        |                |        |        |        |                         |     |       |       |    |    |    |   |   |   |   |  |
| SGO_2019                                                    |            | 5.006  |        |        | -0.881     | 5.633  | 0.0003 | 0.0002 |              | 5.006  |        |        |             | 3.614  |        |        |               |        |        |        |                | 3.614  |        |        |                         |     |       |       |    |    |    |   |   |   |   |  |
| licD; licD3 protein                                         |            |        |        |        |            |        |        |        |              |        |        |        |             |        |        |        |               |        |        |        |                |        |        |        |                         |     |       |       |    |    |    |   |   |   |   |  |
| SGO_2020                                                    |            | 2.585  |        |        |            | 2.585  |        |        |              | 2.585  |        |        |             |        |        |        |               |        |        |        |                |        |        |        |                         |     |       |       |    |    |    |   |   |   |   |  |
| glycosyltransferase                                         |            |        |        |        |            |        |        |        |              |        |        |        |             |        |        |        |               |        |        |        |                |        |        |        |                         |     |       |       |    |    |    |   |   |   |   |  |
| SGO_2021                                                    |            | 5.271  |        |        |            | 5.271  |        |        |              | 5.271  |        |        |             |        |        |        |               |        |        |        |                |        |        |        |                         |     |       |       |    |    |    |   |   |   |   |  |
| Extracellular polysaccharide glycosyltransferase            |            |        |        |        |            |        |        |        |              |        |        |        |             |        |        |        |               |        |        |        |                |        |        |        |                         |     |       |       |    |    |    |   |   |   |   |  |
| SGO_2022                                                    |            | 2.000  |        |        |            | 2.000  |        |        |              | 2.000  |        |        |             |        |        |        |               |        |        |        |                |        |        |        |                         |     |       |       |    |    |    |   |   |   |   |  |
| UDP-glucose 4-epimerase BH3715                              |            |        |        |        |            |        |        |        |              |        |        |        |             |        |        |        |               |        |        |        |                |        |        |        |                         |     |       |       |    |    |    |   |   |   |   |  |

Show detected proteins only  
 Show all proteins

Filter by category:

Proteins found:  
1179

Dot Plots  
Dot Plots

Test Cutoff

q-Value p-Value

.005

| Signif | Direction | Applies To   |
|--------|-----------|--------------|
| yes    | +         | ratios, bars |
| no     | n/a       | bars         |
| yes    | -         | ratios, bars |
| yes    | +         | p-, q-Values |
| yes    | -         | p-, q-Values |



Summary Table SgFn vs Sg SgPg vs Sg SgPgFn vs Sg SgPg v SgFn SgPgFn v SgFn SgPgFn vs SgPg Coverage

| Protein                                                    | SgFn vs Sg |       |        |        | SgPg vs Sg |        |        |        | SgPgFn vs Sg |        |        |        | SgPg v SgFn |       |        |        | SgPgFn v SgFn |       |        |        | SgPgFn vs SgPg |        |        |        | Log <sub>2</sub> Ratios |     |       |       |    |    |    |   |   |   |   |  |
|------------------------------------------------------------|------------|-------|--------|--------|------------|--------|--------|--------|--------------|--------|--------|--------|-------------|-------|--------|--------|---------------|-------|--------|--------|----------------|--------|--------|--------|-------------------------|-----|-------|-------|----|----|----|---|---|---|---|--|
|                                                            | Ratio      | Sum   | q-Val  | p-Val  | Ratio      | Sum    | q-Val  | p-Val  | Ratio        | Sum    | q-Val  | p-Val  | Ratio       | Sum   | q-Val  | p-Val  | Ratio         | Sum   | q-Val  | p-Val  | Ratio          | Sum    | q-Val  | p-Val  | Ratio                   | Sum | q-Val | p-Val | -6 | -4 | -2 | 0 | 2 | 4 | 6 |  |
| SGO_2023                                                   |            | 5.835 |        |        |            | 5.835  |        |        |              | 5.835  |        |        |             |       |        |        |               |       |        |        |                |        |        |        |                         |     |       |       |    |    |    |   |   |   |   |  |
| galactosyltransferase                                      |            |       |        |        |            |        |        |        |              |        |        |        |             |       |        |        |               |       |        |        |                |        |        |        |                         |     |       |       |    |    |    |   |   |   |   |  |
| SGO_2024                                                   |            | 6.956 |        | -1.523 | 7.385      | 0.0014 | 0.0026 | -1.812 | 7.317        | 0.0008 | 0.0021 |        | 4.912       |       |        |        | 4.018         |       |        | -0.289 | 5.777          | 0.0339 | 0.0630 |        |                         |     |       |       |    |    |    |   |   |   |   |  |
| Extracellular polysaccharide biosynthesis                  |            |       |        |        |            |        |        |        |              |        |        |        |             |       |        |        |               |       |        |        |                |        |        |        |                         |     |       |       |    |    |    |   |   |   |   |  |
| SGO_2025                                                   |            | 6.005 |        | -0.304 | 6.869      | 0.0257 | 0.1036 | -1.636 | 6.420        | 0.0005 | 0.0011 |        | 5.206       |       |        |        | 3.296         |       |        | -1.332 | 5.698          | 0.0123 | 0.0128 |        |                         |     |       |       |    |    |    |   |   |   |   |  |
| wze; putative autophosphorylating protein tyrosine kinase  |            |       |        |        |            |        |        |        |              |        |        |        |             |       |        |        |               |       |        |        |                |        |        |        |                         |     |       |       |    |    |    |   |   |   |   |  |
| SGO_2026                                                   |            | 6.124 |        | -0.991 | 6.710      | 0.0019 | 0.0042 |        | 6.124        |        |        |        | 4.614       |       |        |        |               |       |        |        | 4.614          |        |        |        |                         |     |       |       |    |    |    |   |   |   |   |  |
| wzd; polysaccharide export protein, MPA1 family            |            |       |        |        |            |        |        |        |              |        |        |        |             |       |        |        |               |       |        |        |                |        |        |        |                         |     |       |       |    |    |    |   |   |   |   |  |
| SGO_2027                                                   |            | 2.170 |        |        | 2.170      |        |        |        | 2.170        |        |        |        |             |       |        |        |               |       |        |        |                |        |        |        |                         |     |       |       |    |    |    |   |   |   |   |  |
| wzh; wzh/Putative phosphotyrosine-protein phosphatase      |            |       |        |        |            |        |        |        |              |        |        |        |             |       |        |        |               |       |        |        |                |        |        |        |                         |     |       |       |    |    |    |   |   |   |   |  |
| SGO_2028                                                   |            | 6.039 |        | -2.941 | 6.130      | 0.0049 | 0.0138 |        | 6.039        |        |        |        | 1.585       |       |        |        |               |       |        |        | 1.585          |        |        |        |                         |     |       |       |    |    |    |   |   |   |   |  |
| wzg; transcriptional regulator                             |            |       |        |        |            |        |        |        |              |        |        |        |             |       |        |        |               |       |        |        |                |        |        |        |                         |     |       |       |    |    |    |   |   |   |   |  |
| SGO_2033                                                   | 0.426      | 8.356 | 0.0017 | 0.0041 | -0.854     | 7.763  | 0.0003 | 0.0002 | -1.279       | 7.627  | 0.0002 | 0.0003 | -1.280      | 7.538 | 0.0003 | 0.0003 | -1.704        | 6.817 | 0.0004 | 0.0002 | -0.425         | 6.565  | 0.0099 | 0.0085 |                         |     |       |       |    |    |    |   |   |   |   |  |
| nrdD; ribonucleoside-triphosphate reductase                |            |       |        |        |            |        |        |        |              |        |        |        |             |       |        |        |               |       |        |        |                |        |        |        |                         |     |       |       |    |    |    |   |   |   |   |  |
| SGO_2034                                                   | -1.249     | 5.669 | 0.0365 | 0.1951 | -1.989     | 5.567  | 0.0362 | 0.1540 |              | 5.398  |        |        | -0.740      | 3.288 |        |        |               | 2.000 |        |        |                | 1.871  |        |        |                         |     |       |       |    |    |    |   |   |   |   |  |
| hypothetical protein SGO_2034                              |            |       |        |        |            |        |        |        |              |        |        |        |             |       |        |        |               |       |        |        |                |        |        |        |                         |     |       |       |    |    |    |   |   |   |   |  |
| SGO_2037                                                   | -0.611     | 6.209 | 0.0059 | 0.0199 |            | 5.472  |        |        |              | 5.472  |        |        |             | 4.374 |        |        |               | 3.763 |        |        |                |        |        |        |                         |     |       |       |    |    |    |   |   |   |   |  |
| cardiolipin synthase                                       |            |       |        |        |            |        |        |        |              |        |        |        |             |       |        |        |               |       |        |        |                |        |        |        |                         |     |       |       |    |    |    |   |   |   |   |  |
| SGO_2039                                                   |            | 3.546 |        |        | -1.419     | 3.789  | 0.0442 | 0.1931 |              | 3.546  |        |        |             | 0.585 |        |        |               |       |        |        |                | 0.585  |        |        |                         |     |       |       |    |    |    |   |   |   |   |  |
| dihydrofolate synthase                                     |            |       |        |        |            |        |        |        |              |        |        |        |             |       |        |        |               |       |        |        |                |        |        |        |                         |     |       |       |    |    |    |   |   |   |   |  |
| SGO_2041                                                   |            | 3.189 |        | 1.335  | 4.956      | 0.0032 | 0.0078 | 0.282  | 3.847        | 0.0764 | 0.7107 |        | 3.941       |       |        |        | 1.272         |       |        | -1.052 | 4.251          | 0.0482 | 0.1073 |        |                         |     |       |       |    |    |    |   |   |   |   |  |
| conserved hypothetical protein TIGR00250                   |            |       |        |        |            |        |        |        |              |        |        |        |             |       |        |        |               |       |        |        |                |        |        |        |                         |     |       |       |    |    |    |   |   |   |   |  |
| SGO_2042                                                   | 0.631      | 7.574 | 0.0260 | 0.1299 | 2.054      | 8.549  | 0.0006 | 0.0008 | 2.436        | 8.867  | 0.0006 | 0.0013 | 1.423       | 8.197 | 0.0021 | 0.0052 | 1.805         | 7.874 | 0.0017 | 0.0037 | 0.382          | 8.928  | 0.0313 | 0.0550 |                         |     |       |       |    |    |    |   |   |   |   |  |
| Bacterial protein of unknown function (DUF965) superfamily |            |       |        |        |            |        |        |        |              |        |        |        |             |       |        |        |               |       |        |        |                |        |        |        |                         |     |       |       |    |    |    |   |   |   |   |  |
| SGO_2043                                                   |            | 5.470 |        |        | -2.954     | 5.560  | 0.0127 | 0.0442 |              | 5.470  |        |        |             | 1.000 |        |        |               |       |        |        |                | 1.000  |        |        |                         |     |       |       |    |    |    |   |   |   |   |  |
| lipoprotein, putative                                      |            |       |        |        |            |        |        |        |              |        |        |        |             |       |        |        |               |       |        |        |                |        |        |        |                         |     |       |       |    |    |    |   |   |   |   |  |
| SGO_2045                                                   | -2.332     | 9.653 | 0.0005 | 0.0006 | 0.828      | 10.862 | 0.0006 | 0.0008 | 0.911        | 10.917 | 0.0007 | 0.0018 | 3.160       | 9.855 | 0.0000 | 0.0000 | 3.243         | 9.321 | 0.0003 | 0.0001 | 0.083          | 10.745 | 0.0818 | 0.2174 |                         |     |       |       |    |    |    |   |   |   |   |  |
| recA; recA protein                                         |            |       |        |        |            |        |        |        |              |        |        |        |             |       |        |        |               |       |        |        |                |        |        |        |                         |     |       |       |    |    |    |   |   |   |   |  |
| SGO_2046                                                   | 0.441      | 5.691 | 0.0257 | 0.1271 | 0.321      | 5.625  | 0.0568 | 0.2580 | -0.649       | 5.179  | 0.0131 | 0.0925 | -0.120      | 5.303 | 0.0188 | 0.1070 | -1.090        | 4.310 | 0.0010 | 0.0012 | -0.970         | 4.841  | 0.0050 | 0.0022 |                         |     |       |       |    |    |    |   |   |   |   |  |
| cinA; competence induced protein                           |            |       |        |        |            |        |        |        |              |        |        |        |             |       |        |        |               |       |        |        |                |        |        |        |                         |     |       |       |    |    |    |   |   |   |   |  |
| SGO_2049                                                   |            | 1.000 |        |        | 1.000      |        |        |        | 1.000        |        |        |        |             |       |        |        |               |       |        |        |                |        |        |        |                         |     |       |       |    |    |    |   |   |   |   |  |
| tagI; DNA-3-methyladenine glycosylase I                    |            |       |        |        |            |        |        |        |              |        |        |        |             |       |        |        |               |       |        |        |                |        |        |        |                         |     |       |       |    |    |    |   |   |   |   |  |

Show detected proteins only  
 Show all proteins

Proteins found:  
1179

Dot Plots  
Dot Plots

Test

Cutoff

q-Value

p-Value

.005

| Signif | Direction | Applies To   |
|--------|-----------|--------------|
| yes    | +         | ratios, bars |
| no     | n/a       | bars         |
| yes    | -         | ratios, bars |
| yes    | +         | p-, q-Values |
| yes    | -         | p-, q-Values |

SgFn vs Sg —  
SgPgFn vs Sg —  
SgPgFn vs SgFn —  
SgPg vs Sg —  
SgPg vs SgFn —  
SgPgFn vs SgPg —

Summary Table SgFn vs Sg SgPg vs Sg SgPgFn vs Sg SgPg v SgFn SgPgFn v SgFn SgPgFn vs SgPg Coverage

| Protein                                   | SgFn vs Sg |        |        |        | SgPg vs Sg |       |        |        | SgPgFn vs Sg |        |        |        | SgPg v SgFn |       |        |        | SgPgFn v SgFn |       |        |        | SgPgFn vs SgPg |       |        |        | Log <sub>2</sub> Ratios |     |       |       |    |    |    |   |   |   |   |  |  |  |  |  |  |  |  |  |
|-------------------------------------------|------------|--------|--------|--------|------------|-------|--------|--------|--------------|--------|--------|--------|-------------|-------|--------|--------|---------------|-------|--------|--------|----------------|-------|--------|--------|-------------------------|-----|-------|-------|----|----|----|---|---|---|---|--|--|--|--|--|--|--|--|--|
|                                           | Ratio      | Sum    | q-Val  | p-Val  | Ratio      | Sum   | q-Val  | p-Val  | Ratio        | Sum    | q-Val  | p-Val  | Ratio       | Sum   | q-Val  | p-Val  | Ratio         | Sum   | q-Val  | p-Val  | Ratio          | Sum   | q-Val  | p-Val  | Ratio                   | Sum | q-Val | p-Val | -6 | -4 | -2 | 0 | 2 | 4 | 6 |  |  |  |  |  |  |  |  |  |
| <b>SGO_2050</b>                           | 0.126      | 3.423  | 0.1429 | 0.9676 | 1.259      | 4.533 | 0.0163 | 0.0602 |              | 2.849  |        |        | 1.133       | 3.770 | 0.0411 | 0.2701 |               | 0.692 |        |        |                | 3.483 |        |        |                         |     |       |       |    |    |    |   |   |   |   |  |  |  |  |  |  |  |  |  |
| ruvA; Holliday junction DNA helicase RuvA |            |        |        |        |            |       |        |        |              |        |        |        |             |       |        |        |               |       |        |        |                |       |        |        |                         |     |       |       |    |    |    |   |   |   |   |  |  |  |  |  |  |  |  |  |
| <b>SGO_2052</b>                           |            | 3.000  |        |        |            | 3.000 |        |        |              | 3.000  |        |        |             |       |        |        |               |       |        |        |                |       |        |        |                         |     |       |       |    |    |    |   |   |   |   |  |  |  |  |  |  |  |  |  |
| hypothetical protein SGO_2052             |            |        |        |        |            |       |        |        |              |        |        |        |             |       |        |        |               |       |        |        |                |       |        |        |                         |     |       |       |    |    |    |   |   |   |   |  |  |  |  |  |  |  |  |  |
| <b>SGO_2053</b>                           | -0.307     | 6.428  | 0.0257 | 0.1272 | -1.164     | 6.120 | 0.0053 | 0.0152 | -1.264       | 6.077  | 0.0018 | 0.0070 | -0.856      | 5.395 | 0.0050 | 0.0190 | -0.957        | 4.735 | 0.0014 | 0.0024 | -0.100         | 4.861 | 0.1661 | 0.5663 |                         |     |       |       |    |    |    |   |   |   |   |  |  |  |  |  |  |  |  |  |
| DNA mismatch repair protein hexB          |            |        |        |        |            |       |        |        |              |        |        |        |             |       |        |        |               |       |        |        |                |       |        |        |                         |     |       |       |    |    |    |   |   |   |   |  |  |  |  |  |  |  |  |  |
| <b>SGO_2056</b>                           | 0.988      | 7.171  | 0.0049 | 0.0156 | -0.084     | 6.562 | 0.1403 | 0.7223 | -0.777       | 6.303  | 0.0176 | 0.1321 | -1.072      | 6.628 | 0.0033 | 0.0109 | -1.765        | 5.849 | 0.0027 | 0.0072 | -0.693         | 5.734 | 0.0656 | 0.1610 |                         |     |       |       |    |    |    |   |   |   |   |  |  |  |  |  |  |  |  |  |
| mutS; DNA mismatch repair protein MutS    |            |        |        |        |            |       |        |        |              |        |        |        |             |       |        |        |               |       |        |        |                |       |        |        |                         |     |       |       |    |    |    |   |   |   |   |  |  |  |  |  |  |  |  |  |
| <b>SGO_2057</b>                           |            | 5.049  |        |        |            | 5.049 |        |        |              | 5.049  |        |        |             |       |        |        |               |       |        |        |                |       |        |        |                         |     |       |       |    |    |    |   |   |   |   |  |  |  |  |  |  |  |  |  |
| argR; arginine repressor                  |            |        |        |        |            |       |        |        |              |        |        |        |             |       |        |        |               |       |        |        |                |       |        |        |                         |     |       |       |    |    |    |   |   |   |   |  |  |  |  |  |  |  |  |  |
| <b>SGO_2058</b>                           | 0.776      | 10.075 | 0.0002 | 0.0001 | 0.451      | 9.878 | 0.0008 | 0.0011 | 0.830        | 10.111 | 0.0006 | 0.0014 | -0.325      | 9.745 | 0.0011 | 0.0020 | 0.054         | 9.316 | 0.0612 | 0.3967 | 0.379          | 9.776 | 0.0103 | 0.0095 |                         |     |       |       |    |    |    |   |   |   |   |  |  |  |  |  |  |  |  |  |
| argS; arginyl-tRNA synthetase             |            |        |        |        |            |       |        |        |              |        |        |        |             |       |        |        |               |       |        |        |                |       |        |        |                         |     |       |       |    |    |    |   |   |   |   |  |  |  |  |  |  |  |  |  |
| <b>SGO_2059</b>                           |            | 2.058  |        |        |            | 2.058 |        |        |              | 2.058  |        |        |             |       |        |        |               |       |        |        |                |       |        |        |                         |     |       |       |    |    |    |   |   |   |   |  |  |  |  |  |  |  |  |  |
| hypothetical protein SGO_2059             |            |        |        |        |            |       |        |        |              |        |        |        |             |       |        |        |               |       |        |        |                |       |        |        |                         |     |       |       |    |    |    |   |   |   |   |  |  |  |  |  |  |  |  |  |
| <b>SGO_2060</b>                           | 0.598      | 7.874  | 0.0093 | 0.0357 | 0.996      | 8.121 | 0.0014 | 0.0027 | -0.098       | 7.496  | 0.0584 | 0.5233 | 0.399       | 7.832 | 0.0038 | 0.0130 | -0.696        | 6.704 | 0.0031 | 0.0087 | -1.094         | 7.569 | 0.0012 | 0.0001 |                         |     |       |       |    |    |    |   |   |   |   |  |  |  |  |  |  |  |  |  |
| aspS-1; aspartyl-tRNA synthetase          |            |        |        |        |            |       |        |        |              |        |        |        |             |       |        |        |               |       |        |        |                |       |        |        |                         |     |       |       |    |    |    |   |   |   |   |  |  |  |  |  |  |  |  |  |
| <b>SGO_2062</b>                           | 1.266      | 8.848  | 0.0012 | 0.0025 | 0.686      | 8.464 | 0.0046 | 0.0126 | 0.880        | 8.587  | 0.0018 | 0.0073 | -0.579      | 8.567 | 0.0028 | 0.0084 | -0.386        | 8.038 | 0.0077 | 0.0286 | 0.193          | 8.348 | 0.0506 | 0.1152 |                         |     |       |       |    |    |    |   |   |   |   |  |  |  |  |  |  |  |  |  |
| hisS; histidyl-tRNA synthetase            |            |        |        |        |            |       |        |        |              |        |        |        |             |       |        |        |               |       |        |        |                |       |        |        |                         |     |       |       |    |    |    |   |   |   |   |  |  |  |  |  |  |  |  |  |
| <b>SGO_2064</b>                           | 1.217      | 8.670  | 0.0002 | 0.0002 | 1.647      | 8.986 | 0.0005 | 0.0006 | 1.405        | 8.804  | 0.0002 | 0.0003 | 0.430       | 8.872 | 0.0029 | 0.0089 | 0.188         | 8.126 | 0.0073 | 0.0270 | -0.242         | 8.955 | 0.0271 | 0.0454 |                         |     |       |       |    |    |    |   |   |   |   |  |  |  |  |  |  |  |  |  |
| ilvD; dihydroxy-acid dehydratase          |            |        |        |        |            |       |        |        |              |        |        |        |             |       |        |        |               |       |        |        |                |       |        |        |                         |     |       |       |    |    |    |   |   |   |   |  |  |  |  |  |  |  |  |  |
| <b>SGO_2065</b>                           |            |        |        |        |            |       |        |        |              |        |        |        |             |       |        |        |               |       |        |        |                |       |        |        |                         |     |       |       |    |    |    |   |   |   |   |  |  |  |  |  |  |  |  |  |
| rpmF; ribosomal protein L32               |            |        |        |        |            |       |        |        |              |        |        |        |             |       |        |        |               |       |        |        |                |       |        |        |                         |     |       |       |    |    |    |   |   |   |   |  |  |  |  |  |  |  |  |  |
| <b>SGO_2066</b>                           | -0.335     | 6.614  | 0.0814 | 0.5094 | 1.393      | 7.977 | 0.0019 | 0.0041 | 1.056        | 7.749  | 0.0037 | 0.0182 | 1.727       | 7.190 | 0.0158 | 0.0853 | 1.390         | 6.300 | 0.0278 | 0.1487 | -0.337         | 7.834 | 0.0466 | 0.1024 |                         |     |       |       |    |    |    |   |   |   |   |  |  |  |  |  |  |  |  |  |
| rpmG; ribosomal protein L33               |            |        |        |        |            |       |        |        |              |        |        |        |             |       |        |        |               |       |        |        |                |       |        |        |                         |     |       |       |    |    |    |   |   |   |   |  |  |  |  |  |  |  |  |  |
| <b>SGO_2070</b>                           | -0.754     | 6.302  | 0.0416 | 0.2298 | -0.247     | 6.477 | 0.0921 | 0.4498 | -0.962       | 6.219  | 0.0204 | 0.1592 | 0.507       | 5.531 | 0.0345 | 0.2179 | -0.208        | 4.559 | 0.0776 | 0.5231 | -0.715         | 5.430 | 0.0332 | 0.0611 |                         |     |       |       |    |    |    |   |   |   |   |  |  |  |  |  |  |  |  |  |
| hypothetical protein SGO_2070             |            |        |        |        |            |       |        |        |              |        |        |        |             |       |        |        |               |       |        |        |                |       |        |        |                         |     |       |       |    |    |    |   |   |   |   |  |  |  |  |  |  |  |  |  |
| <b>SGO_2073</b>                           |            |        |        |        |            |       |        |        |              | 1.981  |        |        |             |       |        |        |               | 0.857 |        |        |                | 1.468 |        |        |                         |     |       |       |    |    |    |   |   |   |   |  |  |  |  |  |  |  |  |  |
| FtsK/SpoIIIE family subfamily, putative   |            |        |        |        |            |       |        |        |              |        |        |        |             |       |        |        |               |       |        |        |                |       |        |        |                         |     |       |       |    |    |    |   |   |   |   |  |  |  |  |  |  |  |  |  |
| <b>SGO_2080</b>                           |            | 5.162  |        |        | -0.970     | 5.772 | 0.0103 | 0.0343 |              | 5.162  |        |        |             | 3.723 |        |        |               |       |        |        |                | 3.723 |        |        |                         |     |       |       |    |    |    |   |   |   |   |  |  |  |  |  |  |  |  |  |
| transcription activator plcR              |            |        |        |        |            |       |        |        |              |        |        |        |             |       |        |        |               |       |        |        |                |       |        |        |                         |     |       |       |    |    |    |   |   |   |   |  |  |  |  |  |  |  |  |  |
| <b>SGO_2081</b>                           |            | 6.027  |        |        | -2.513     | 6.148 | 0.0099 | 0.0328 |              | 6.027  |        |        |             | 2.000 |        |        |               |       |        |        |                | 2.000 |        |        |                         |     |       |       |    |    |    |   |   |   |   |  |  |  |  |  |  |  |  |  |
| lipoprotein, putative                     |            |        |        |        |            |       |        |        |              |        |        |        |             |       |        |        |               |       |        |        |                |       |        |        |                         |     |       |       |    |    |    |   |   |   |   |  |  |  |  |  |  |  |  |  |

Show detected proteins only  
 Show all proteins

Proteins found:  
1179

Dot Plots  
Dot Plots

Test

Cutoff

q-Value

p-Value

.005

| Signif | Direction | Applies To   |
|--------|-----------|--------------|
| yes    | +         | ratios, bars |
| no     | n/a       | bars         |
| yes    | -         | ratios, bars |
| yes    | +         | p-, q-Values |
| yes    | -         | p-, q-Values |

SgFn vs Sg — — SgPg vs Sg  
SgPgFn vs Sg — — SgPg vs SgFn  
SgPgFn vs SgFn — — SgPgFn vs SgPg



Summary Table SgFn vs Sg SgPg vs Sg SgPgFn vs Sg SgPg v SgFn SgPgFn v SgFn SgPgFn vs SgPg Coverage

| Protein                                      | SgFn vs Sg |        |        |        | SgPg vs Sg |        |        |        | SgPgFn vs Sg |        |        |        | SgPg v SgFn |        |        |        | SgPgFn v SgFn |        |        |        | SgPgFn vs SgPg |        |        |        | Log <sub>2</sub> Ratios |     |       |       |    |    |    |   |   |   |   |  |
|----------------------------------------------|------------|--------|--------|--------|------------|--------|--------|--------|--------------|--------|--------|--------|-------------|--------|--------|--------|---------------|--------|--------|--------|----------------|--------|--------|--------|-------------------------|-----|-------|-------|----|----|----|---|---|---|---|--|
|                                              | Ratio      | Sum    | q-Val  | p-Val  | Ratio      | Sum    | q-Val  | p-Val  | Ratio        | Sum    | q-Val  | p-Val  | Ratio       | Sum    | q-Val  | p-Val  | Ratio         | Sum    | q-Val  | p-Val  | Ratio          | Sum    | q-Val  | p-Val  | Ratio                   | Sum | q-Val | p-Val | -6 | -4 | -2 | 0 | 2 | 4 | 6 |  |
| SGO_2082                                     | -2.782     | 5.615  | 0.0263 | 0.1323 |            | 5.515  |        |        |              | 5.515  |        |        |             | 1.196  |        |        |               | 0.585  |        |        |                |        |        |        |                         |     |       |       |    |    |    |   |   |   |   |  |
| lipoprotein, putative                        |            |        |        |        |            |        |        |        |              |        |        |        |             |        |        |        |               |        |        |        |                |        |        |        |                         |     |       |       |    |    |    |   |   |   |   |  |
| SGO_2084                                     | 0.089      | 5.219  | 0.0952 | 0.6113 | -0.180     | 4.686  | 0.0926 | 0.4531 |              | 4.161  |        |        | -0.269      | 4.253  | 0.0745 | 0.5363 |               | 3.151  |        |        |                | 2.459  |        |        |                         |     |       |       |    |    |    |   |   |   |   |  |
| NAD(P)H dehydrogenase, quinone family        |            |        |        |        |            |        |        |        |              |        |        |        |             |        |        |        |               |        |        |        |                |        |        |        |                         |     |       |       |    |    |    |   |   |   |   |  |
| SGO_2085                                     | -0.782     | 8.011  | 0.0004 | 0.0004 | -0.211     | 8.247  | 0.0036 | 0.0090 | -0.164       | 8.270  | 0.0050 | 0.0265 | 0.571       | 7.367  | 0.0003 | 0.0003 | 0.619         | 6.785  | 0.0006 | 0.0006 | 0.047          | 7.648  | 0.0778 | 0.2038 |                         |     |       |       |    |    |    |   |   |   |   |  |
| purB; adenylosuccinate lyase                 |            |        |        |        |            |        |        |        |              |        |        |        |             |        |        |        |               |        |        |        |                |        |        |        |                         |     |       |       |    |    |    |   |   |   |   |  |
| SGO_2086                                     |            | 4.929  |        |        |            | 4.929  |        |        |              | 4.929  |        |        |             |        |        |        |               |        |        |        |                |        |        |        |                         |     |       |       |    |    |    |   |   |   |   |  |
| hypothetical protein SGO_2086                |            |        |        |        |            |        |        |        |              |        |        |        |             |        |        |        |               |        |        |        |                |        |        |        |                         |     |       |       |    |    |    |   |   |   |   |  |
| SGO_2094                                     |            | 5.483  |        |        |            | 5.483  |        |        |              | 5.483  |        |        |             |        |        |        |               |        |        |        |                |        |        |        |                         |     |       |       |    |    |    |   |   |   |   |  |
| general stress protein GSP-781               |            |        |        |        |            |        |        |        |              |        |        |        |             |        |        |        |               |        |        |        |                |        |        |        |                         |     |       |       |    |    |    |   |   |   |   |  |
| SGO_2096                                     |            | 8.836  |        |        |            | 8.836  |        |        |              | 8.836  |        |        |             |        |        |        |               |        |        |        |                |        |        |        |                         |     |       |       |    |    |    |   |   |   |   |  |
| comB; transport protein ComB                 |            |        |        |        |            |        |        |        |              |        |        |        |             |        |        |        |               |        |        |        |                |        |        |        |                         |     |       |       |    |    |    |   |   |   |   |  |
| SGO_2097                                     |            | 9.971  |        |        | -5.519     | 10.002 | 0.0001 | 0.0000 | -6.574       | 9.979  | 0.0032 | 0.0151 |             | 3.939  |        |        |               | 1.272  |        |        | -1.055         | 4.250  | 0.0195 | 0.0268 |                         |     |       |       |    |    |    |   |   |   |   |  |
| comA; ATP-binding Transport protein ComA     |            |        |        |        |            |        |        |        |              |        |        |        |             |        |        |        |               |        |        |        |                |        |        |        |                         |     |       |       |    |    |    |   |   |   |   |  |
| SGO_2098                                     | 0.507      | 11.004 | 0.0078 | 0.0287 | 0.885      | 11.230 | 0.0001 | 0.0001 | 0.782        | 11.174 | 0.0034 | 0.0159 | 0.377       | 10.921 | 0.0072 | 0.0303 | 0.275         | 10.262 | 0.0340 | 0.1914 | -0.102         | 11.049 | 0.1579 | 0.5181 |                         |     |       |       |    |    |    |   |   |   |   |  |
| rpsD; ribosomal protein S4                   |            |        |        |        |            |        |        |        |              |        |        |        |             |        |        |        |               |        |        |        |                |        |        |        |                         |     |       |       |    |    |    |   |   |   |   |  |
| SGO_2099                                     |            |        |        |        |            | 3.098  |        |        |              |        |        |        |             | 2.585  |        |        |               |        |        |        |                | 2.585  |        |        |                         |     |       |       |    |    |    |   |   |   |   |  |
| ABC transporter ATP-binding protein          |            |        |        |        |            |        |        |        |              |        |        |        |             |        |        |        |               |        |        |        |                |        |        |        |                         |     |       |       |    |    |    |   |   |   |   |  |
| SGO_2100                                     | -0.870     | 6.617  | 0.0014 | 0.0029 | 2.646      | 8.845  | 0.0002 | 0.0001 | 2.702        | 8.891  | 0.0001 | 0.0000 | 3.516       | 8.239  | 0.0002 | 0.0001 | 3.572         | 7.678  | 0.0001 | 0.0000 | 0.055          | 9.145  | 0.1191 | 0.3624 |                         |     |       |       |    |    |    |   |   |   |   |  |
| ABC transporter substrate-binding protein    |            |        |        |        |            |        |        |        |              |        |        |        |             |        |        |        |               |        |        |        |                |        |        |        |                         |     |       |       |    |    |    |   |   |   |   |  |
| SGO_2102                                     |            |        |        |        |            | 5.180  |        |        |              | 2.170  |        |        |             | 4.667  |        |        |               | 1.046  |        |        | -1.959         | 4.836  | 0.0805 | 0.2118 |                         |     |       |       |    |    |    |   |   |   |   |  |
| hypothetical protein SGO_2102                |            |        |        |        |            |        |        |        |              |        |        |        |             |        |        |        |               |        |        |        |                |        |        |        |                         |     |       |       |    |    |    |   |   |   |   |  |
| SGO_2103                                     | 0.861      | 3.079  |        |        |            | 1.585  |        |        |              | 1.585  |        |        |             | 1.933  |        |        |               | 1.322  |        |        |                |        |        |        |                         |     |       |       |    |    |    |   |   |   |   |  |
| hydrolase, haloacid dehalogenase-like family |            |        |        |        |            |        |        |        |              |        |        |        |             |        |        |        |               |        |        |        |                |        |        |        |                         |     |       |       |    |    |    |   |   |   |   |  |
| SGO_2104                                     | -1.959     | 9.563  | 0.0003 | 0.0002 | -1.730     | 9.606  | 0.0001 | 0.0000 | -1.198       | 9.753  | 0.0005 | 0.0011 | 0.230       | 7.893  | 0.0562 | 0.3877 | 0.762         | 7.600  | 0.0117 | 0.0501 | 0.532          | 8.288  | 0.0328 | 0.0594 |                         |     |       |       |    |    |    |   |   |   |   |  |
| srtB; sortase B                              |            |        |        |        |            |        |        |        |              |        |        |        |             |        |        |        |               |        |        |        |                |        |        |        |                         |     |       |       |    |    |    |   |   |   |   |  |
| SGO_2105                                     | -1.919     | 12.653 | 0.0005 | 0.0008 | -6.934     | 12.327 | 0.0003 | 0.0003 | -6.361       | 12.333 | 0.0002 | 0.0003 | -5.016      | 9.922  | 0.0000 | 0.0000 | -4.443        | 9.332  | 0.0000 | 0.0000 | 0.573          | 6.179  | 0.0050 | 0.0019 |                         |     |       |       |    |    |    |   |   |   |   |  |
| abpA; amylase-binding protein AbpA           |            |        |        |        |            |        |        |        |              |        |        |        |             |        |        |        |               |        |        |        |                |        |        |        |                         |     |       |       |    |    |    |   |   |   |   |  |
| SGO_2106                                     | 0.371      | 8.552  | 0.0141 | 0.0613 | 0.037      | 8.367  | 0.1120 | 0.5587 | -0.130       | 8.283  | 0.0006 | 0.0015 | -0.334      | 8.056  | 0.0167 | 0.0923 | -0.501        | 7.373  | 0.0085 | 0.0332 | -0.167         | 7.791  | 0.0396 | 0.0799 |                         |     |       |       |    |    |    |   |   |   |   |  |
| ribose-phosphate diphosphokinase             |            |        |        |        |            |        |        |        |              |        |        |        |             |        |        |        |               |        |        |        |                |        |        |        |                         |     |       |       |    |    |    |   |   |   |   |  |
| SGO_2107                                     |            | 3.785  |        |        |            | 3.785  |        |        |              | 3.785  |        |        |             |        |        |        |               |        |        |        |                |        |        |        |                         |     |       |       |    |    |    |   |   |   |   |  |
| general stress protein GSP-781               |            |        |        |        |            |        |        |        |              |        |        |        |             |        |        |        |               |        |        |        |                |        |        |        |                         |     |       |       |    |    |    |   |   |   |   |  |

Show detected proteins only  
 Show all proteins

Proteins found:  
1179

Dot Plots  
Dot Plots

Test

Cutoff

q-Value

p-Value

.005

| Signif | Direction | Applies To   |
|--------|-----------|--------------|
| yes    | +         | ratios, bars |
| no     | n/a       | bars         |
| yes    | -         | ratios, bars |
| yes    | +         | p-, q-Values |
| yes    | -         | p-, q-Values |

SgFn vs Sg — — SgPg vs Sg  
SgPgFn vs Sg — — SgPg v SgFn  
SgPgFn vs SgFn — — SgPgFn vs SgPg

Summary Table SgFn vs Sg SgPg vs Sg SgPgFn vs Sg SgPg v SgFn SgPgFn v SgFn SgPgFn vs SgPg Coverage

| Protein                                                        | SgFn vs Sg    |        |        |        | SgPg vs Sg    |        |        |        | SgPgFn vs Sg  |        |        |        | SgPg v SgFn   |       |        |        | SgPgFn v SgFn |       |        |        | SgPgFn vs SgPg |       |        |        | Log <sub>2</sub> Ratios |     |       |       |    |    |    |   |   |   |   |  |  |  |
|----------------------------------------------------------------|---------------|--------|--------|--------|---------------|--------|--------|--------|---------------|--------|--------|--------|---------------|-------|--------|--------|---------------|-------|--------|--------|----------------|-------|--------|--------|-------------------------|-----|-------|-------|----|----|----|---|---|---|---|--|--|--|
|                                                                | Ratio         | Sum    | q-Val  | p-Val  | Ratio         | Sum    | q-Val  | p-Val  | Ratio         | Sum    | q-Val  | p-Val  | Ratio         | Sum   | q-Val  | p-Val  | Ratio         | Sum   | q-Val  | p-Val  | Ratio          | Sum   | q-Val  | p-Val  | Ratio                   | Sum | q-Val | p-Val | -6 | -4 | -2 | 0 | 2 | 4 | 6 |  |  |  |
| <b>SGO_2108</b><br>mreC; cell shape-determining protein MreC   |               | 6.472  |        |        | <b>-2.938</b> | 6.651  | 0.0001 | 0.0000 |               | 6.472  |        |        |               | 3.036 |        |        |               |       |        |        |                | 3.036 |        |        |                         |     |       |       |    |    |    |   |   |   |   |  |  |  |
| <b>SGO_2133</b><br>Cell division protein ftsH-like protein     | <b>-0.914</b> | 10.415 | 0.0008 | 0.0014 | <b>-1.361</b> | 10.272 | 0.0002 | 0.0001 | <b>-1.206</b> | 10.318 | 0.0002 | 0.0002 | -0.447        | 9.169 | 0.0060 | 0.0240 | -0.292        | 8.626 | 0.0149 | 0.0680 | 0.155          | 9.003 | 0.0195 | 0.0267 |                         |     |       |       |    |    |    |   |   |   |   |  |  |  |
| <b>SGO_2134</b><br>hpt; hypoxanthine phosphoribosyltransferase | <b>1.391</b>  | 8.622  | 0.0005 | 0.0008 | -0.013        | 7.764  | 0.1588 | 0.8316 | -0.203        | 7.684  | 0.0476 | 0.4172 | <b>-1.405</b> | 8.099 | 0.0001 | 0.0000 | <b>-1.595</b> | 7.444 | 0.0006 | 0.0004 | -0.190         | 7.151 | 0.1153 | 0.3458 |                         |     |       |       |    |    |    |   |   |   |   |  |  |  |
| <b>SGO_2138</b><br>Septum formation initiator family           |               | 2.322  |        |        |               | 2.322  |        |        |               | 2.322  |        |        |               |       |        |        |               |       |        |        |                |       |        |        |                         |     |       |       |    |    |    |   |   |   |   |  |  |  |
| <b>SGO_2139</b><br>S4 RNA-binding domain protein               |               | 1.379  |        |        |               | 1.380  |        |        |               | 1.380  |        |        |               |       |        |        |               |       |        |        |                |       |        |        |                         |     |       |       |    |    |    |   |   |   |   |  |  |  |
| <b>SGO_2140</b><br>transcription-repair coupling factor        |               | 3.667  |        |        |               | 3.667  |        |        |               | 3.667  |        |        |               |       |        |        |               |       |        |        |                |       |        |        |                         |     |       |       |    |    |    |   |   |   |   |  |  |  |
| <b>SGO_2141</b><br>pth; peptidyl-tRNA hydrolase                |               | 1.000  |        |        |               | 1.000  |        |        |               | 1.000  |        |        |               |       |        |        |               |       |        |        |                |       |        |        |                         |     |       |       |    |    |    |   |   |   |   |  |  |  |
| <b>SGO_2142</b><br>GTP-binding protein                         | -0.098        | 7.739  | 0.0609 | 0.3630 | <b>0.906</b>  | 8.309  | 0.0011 | 0.0018 | <b>0.662</b>  | 8.157  | 0.0025 | 0.0106 | <b>1.004</b>  | 7.762 | 0.0008 | 0.0011 | <b>0.760</b>  | 6.995 | 0.0026 | 0.0067 | -0.244         | 8.063 | 0.0397 | 0.0812 |                         |     |       |       |    |    |    |   |   |   |   |  |  |  |
| <b>SGO_2145</b><br>comE; competence response regulator ComE    |               | 8.707  |        |        | -0.255        | 9.587  | 0.0085 | 0.0270 | <b>-0.254</b> | 9.586  | 0.0013 | 0.0045 |               | 7.942 |        |        |               | 7.329 |        |        | 0.001          | 8.941 | 0.2492 | 0.9711 |                         |     |       |       |    |    |    |   |   |   |   |  |  |  |
| <b>SGO_2146</b><br>comD; histidine protein kinase ComD         |               | 6.837  |        |        | <b>-1.707</b> | 7.223  | 0.0003 | 0.0003 | -2.665        | 6.947  | 0.0073 | 0.0420 |               | 4.618 |        |        |               | 2.046 |        |        | -0.958         | 4.948 | 0.0402 | 0.0827 |                         |     |       |       |    |    |    |   |   |   |   |  |  |  |
| <b>SGO_2150</b><br>degP; serine protease                       | <b>-0.999</b> | 8.352  | 0.0006 | 0.0008 | <b>-1.324</b> | 8.249  | 0.0002 | 0.0001 | <b>-2.772</b> | 7.969  | 0.0002 | 0.0001 | -0.325        | 7.102 | 0.0081 | 0.0362 | <b>-1.773</b> | 6.029 | 0.0014 | 0.0025 | <b>-1.449</b>  | 6.392 | 0.0050 | 0.0020 |                         |     |       |       |    |    |    |   |   |   |   |  |  |  |

Show detected proteins only  
 Show all proteins

Proteins found:  
1179

Filter by category:  
ABC Transporter

Dot Plots  
Dot Plots

Test Cutoff

q-Value

p-Value

.005

| Signif | Direction | Applies To   |
|--------|-----------|--------------|
| yes    | +         | ratios, bars |
| no     | n/a       | bars         |
| yes    | -         | ratios, bars |
| yes    | +         | p-, q-Values |
| yes    | -         | p-, q-Values |

SgFn vs Sg —  
SgPgFn vs Sg —  
SgPgFn vs SgFn —

— SgPg vs Sg  
— SgPg vs SgFn  
— SgPgFn vs SgPg
