# Supplementary material for: Proteomics of Streptococcus gordonii within a model developing oral microbial community
Source: PubMed Central journal article supplement (PMC3534352; doi:10.1186/1471-2180-12-211), 2012-09-18
Supplement: 1471-2180-12-211-S2.pdf [file 1471-2180-12-211-S2.pdf]

Summary Table

SgFn vs Sg

SgPg vs Sg

SgPgFn vs Sg

SgPg vs SgFn

SgPgFn vs SgFn

SgPgFn vs SgPg

Coverage

SgFn vs Sg

Raw

Normalized

Log<sub>2</sub> Ratios

| Protein  | SgFn vs Sg             |                      |         |         | Raw    |         | Normalized |          | Description                                                        | Log <sub>2</sub> Ratios |    |    |   |   |   |   |
|----------|------------------------|----------------------|---------|---------|--------|---------|------------|----------|--------------------------------------------------------------------|-------------------------|----|----|---|---|---|---|
|          | Log <sub>2</sub> Ratio | Log <sub>2</sub> Sum | q-Value | p-Value | SgFn   | Sg      | SgFn       | Sg       |                                                                    | -6                      | -4 | -2 | 0 | 2 | 4 | 6 |
| SGO_0001 | -0.902                 | 7.046                | 0.0101  | 0.0398  | 9.500  | 32.000  | 20.7045    | 33.3027  | dnaA; chromosomal replication initiator protein DnaA               |                         |    |    |   |   |   |   |
|          |                        |                      |         |         | 10.500 | 53.500  | 24.6409    | 53.5000  |                                                                    |                         |    |    |   |   |   |   |
| SGO_0002 | 0.640                  | 7.258                | 0.0146  | 0.0633  | 20.000 | 21.000  | 43.5884    | 21.8549  | dnaN; DNA polymerase III, beta subunit                             |                         |    |    |   |   |   |   |
|          |                        |                      |         |         | 20.500 | 39.500  | 48.1085    | 39.5000  |                                                                    |                         |    |    |   |   |   |   |
| SGO_0004 | -1.661                 | 8.780                | 0.0020  | 0.0050  | 29.500 | 137.000 | 64.2929    | 142.5772 | putative lipoprotein                                               |                         |    |    |   |   |   |   |
|          |                        |                      |         |         | 18.000 | 190.500 | 42.2416    | 190.5000 |                                                                    |                         |    |    |   |   |   |   |
| SGO_0006 | 0.158                  | 7.655                | 0.0485  | 0.2750  | 28.000 | 44.000  | 61.0238    | 45.7912  | ABC transporter, ATP-binding protein                               |                         |    |    |   |   |   |   |
|          |                        |                      |         |         | 19.500 | 49.000  | 45.7618    | 49.0000  |                                                                    |                         |    |    |   |   |   |   |
| SGO_0007 | -0.294                 | 6.164                | 0.0417  | 0.2311  | 9.000  | 17.000  | 19.6148    | 17.6921  | trpS; tryptophanyl-tRNA synthetase                                 |                         |    |    |   |   |   |   |
|          |                        |                      |         |         | 5.500  | 21.500  | 12.9072    | 21.5000  |                                                                    |                         |    |    |   |   |   |   |
| SGO_0008 | 0.310                  | 9.371                | 0.0149  | 0.0651  | 77.000 | 156.500 | 167.8155   | 162.8711 | inosine-5'-monophosphate dehydrogenase                             |                         |    |    |   |   |   |   |
|          |                        |                      |         |         | 84.500 | 133.000 | 198.3010   | 133.0000 |                                                                    |                         |    |    |   |   |   |   |
| SGO_0011 | -0.863                 | 5.257                | 0.0270  | 0.1369  |        | 13.000  |            | 13.5292  | proteinase, M16 family                                             |                         |    |    |   |   |   |   |
|          |                        |                      |         |         | 3.500  | 16.500  | 8.2136     | 16.5000  |                                                                    |                         |    |    |   |   |   |   |
| SGO_0012 | 1.455                  | 4.510                | 0.0205  | 0.0948  | 4.000  |         | 8.7177     |          | mpp; peptidase, M16 family                                         |                         |    |    |   |   |   |   |
|          |                        |                      |         |         | 4.500  | 3.500   | 10.5604    | 3.5000   |                                                                    |                         |    |    |   |   |   |   |
| SGO_0015 | -2.771                 | 6.426                | 0.0058  | 0.0196  |        | 39.500  |            | 41.1080  | ABC transporter (ATP-binding protein)                              |                         |    |    |   |   |   |   |
|          |                        |                      |         |         | 2.500  | 39.000  | 5.8669     | 39.0000  |                                                                    |                         |    |    |   |   |   |   |
| SGO_0020 | -0.115                 | 4.222                | 0.1386  | 0.9320  | 1.500  |         | 3.2691     |          | sdhB; L-serine dehydratase, iron-sulfur-dependent, beta subunit    |                         |    |    |   |   |   |   |
|          |                        |                      |         |         | 4.000  | 6.000   | 9.3870     | 6.0000   |                                                                    |                         |    |    |   |   |   |   |
| SGO_0022 | 3.662                  | 7.860                | 0.0001  | 0.0000  | 50.000 | 6.000   | 108.9711   | 6.2443   | trmU; tRNA (5-methylaminomethyl-2-thiouridylate)-methyltransferase |                         |    |    |   |   |   |   |
|          |                        |                      |         |         | 45.000 | 11.500  | 105.6041   | 11.5000  |                                                                    |                         |    |    |   |   |   |   |
| SGO_0025 | -0.570                 | 5.781                | 0.0268  | 0.1355  | 3.500  | 14.500  | 7.6280     | 15.0903  | gidA; glucose inhibited division protein A                         |                         |    |    |   |   |   |   |
|          |                        |                      |         |         | 6.500  | 17.000  | 15.2539    | 17.0000  |                                                                    |                         |    |    |   |   |   |   |

- Show detected proteins only  
 Show all proteins

Proteins found:  
769

Filter by category:

ABC Transporter

Test

Cutoff

q-Value

.005

p-Value

|             | Signif | Direction | Applies To   |
|-------------|--------|-----------|--------------|
| Red         | yes    | +         | ratios, bars |
| Yellow      | no     | n/a       | bars         |
| Green       | yes    | -         | ratios, bars |
| Pink        | yes    | +         | p-, q-Values |
| Light Green | yes    | -         | p-, q-Values |

Dot Plots Dot Plots

Summary Table

SgFn vs Sg

SgPg vs Sg

SgPgFn vs Sg

SgPg vs SgFn

SgPgFn vs SgFn

SgPgFn vs SgPg

Coverage

SgFn vs Sg

Raw

Normalized

Log<sub>2</sub> Ratios

| Protein  | SgFn vs Sg             |                      |         |         | Raw    |          | Normalized |           | Description                                          | Log <sub>2</sub> Ratios |    |    |   |   |
|----------|------------------------|----------------------|---------|---------|--------|----------|------------|-----------|------------------------------------------------------|-------------------------|----|----|---|---|
|          | Log <sub>2</sub> Ratio | Log <sub>2</sub> Sum | q-Value | p-Value | SgFn   | Sg       | SgFn       | Sg        |                                                      | -6                      | -4 | -2 | 0 | 2 |
| SGO_0027 | -0.380                 | 6.937                | 0.0100  | 0.0393  | 11.000 | 30.500   | 23.9736    | 31.7416   | rplI; ribosomal protein L9                           |                         |    |    |   |   |
|          |                        |                      |         |         | 12.500 | 37.500   | 29.3345    | 37.5000   |                                                      |                         |    |    |   |   |
| SGO_0028 | -1.442                 | 5.255                | 0.0034  | 0.0101  | 2.000  | 11.000   | 4.3588     | 11.4478   | dnaC; replicative DNA helicase                       |                         |    |    |   |   |
|          |                        |                      |         |         | 2.500  | 16.500   | 5.8669     | 16.5000   |                                                      |                         |    |    |   |   |
| SGO_0030 | 2.151                  | 7.906                | 0.0001  | 0.0000  | 44.500 | 19.000   | 96.9843    | 19.7735   | aspB; aspartate transaminase                         |                         |    |    |   |   |
|          |                        |                      |         |         | 42.000 | 24.500   | 98.5638    | 24.5000   |                                                      |                         |    |    |   |   |
| SGO_0032 | -0.944                 | 7.088                | 0.0028  | 0.0077  | 9.500  | 38.000   | 20.7045    | 39.5470   | plsX; fatty acid/phospholipid synthesis protein PlsX |                         |    |    |   |   |
|          |                        |                      |         |         | 11.000 | 50.000   | 25.8143    | 50.0000   |                                                      |                         |    |    |   |   |
| SGO_0035 | 2.367                  | 5.314                | 0.0174  | 0.0779  | 7.500  |          | 16.3457    |           | phosphoribosylformylglycinamide synthase             |                         |    |    |   |   |
|          |                        |                      |         |         | 8.500  | 3.500    | 19.9474    | 3.5000    |                                                      |                         |    |    |   |   |
| SGO_0042 | 0.918                  | 6.144                | 0.0003  | 0.0002  | 11.000 | 11.500   | 23.9736    | 11.9682   | transcription regulator, GntR family                 |                         |    |    |   |   |
|          |                        |                      |         |         | 9.500  | 12.500   | 22.2942    | 12.5000   |                                                      |                         |    |    |   |   |
| SGO_0054 | 1.565                  | 8.469                | 0.0001  | 0.0001  | 59.000 | 40.000   | 128.5859   | 41.6284   | dltA; D-alanine-activating enzyme                    |                         |    |    |   |   |
|          |                        |                      |         |         | 58.000 | 48.000   | 136.1119   | 48.0000   |                                                      |                         |    |    |   |   |
| SGO_0056 | -0.711                 | 3.805                | 0.0112  | 0.0452  | 1.500  | 5.000    | 3.2691     | 5.2035    | dltC; D-alanyl carrier protein                       |                         |    |    |   |   |
|          |                        |                      |         |         |        | 5.500    |            | 5.5000    |                                                      |                         |    |    |   |   |
| SGO_0057 | -1.818                 | 8.223                | 0.0010  | 0.0018  | 17.500 | 99.500   | 38.1399    | 103.5506  | dltD protein                                         |                         |    |    |   |   |
|          |                        |                      |         |         | 12.000 | 129.000  | 28.1611    | 129.0000  |                                                      |                         |    |    |   |   |
| SGO_0059 | -2.492                 | 11.167               | 0.0067  | 0.0235  | 93.500 | 1257.500 | 203.7760   | 1308.6923 | pXO1; hypothetical protein SGO_0059                  |                         |    |    |   |   |
|          |                        |                      |         |         | 56.500 | 653.500  | 132.5918   | 653.5000  |                                                      |                         |    |    |   |   |
| SGO_0060 | -4.809                 | 8.069                | 0.0112  | 0.0455  |        | 118.000  |            | 122.8037  | hypothetical protein SGO_0060                        |                         |    |    |   |   |
|          |                        |                      |         |         | 2.000  | 141.000  | 4.6935     | 141.0000  |                                                      |                         |    |    |   |   |
| SGO_0063 | -1.969                 | 7.830                | 0.0001  | 0.0000  | 9.500  | 86.000   | 20.7045    | 89.5010   | hypothetical protein SGO_0063                        |                         |    |    |   |   |
|          |                        |                      |         |         | 11.000 | 91.500   | 25.8143    | 91.5000   |                                                      |                         |    |    |   |   |

 Show detected proteins only Show all proteinsProteins found:  
769 Filter by category:

ABC Transporter

Test

Cutoff

q-Value

.005

p-Value

|             | Signif | Direction | Applies To   |
|-------------|--------|-----------|--------------|
| Red         | yes    | +         | ratios, bars |
| Yellow      | no     | n/a       | bars         |
| Green       | yes    | -         | ratios, bars |
| Pink        | yes    | +         | p-, q-Values |
| Light Green | yes    | -         | p-, q-Values |

Dot Plots Dot Plots

Summary Table

SgFn vs Sg

SgPg vs Sg

SgPgFn vs Sg

SgPg vs SgFn

SgPgFn vs SgFn

SgPgFn vs SgPg

Coverage

SgFn vs Sg

Raw

Normalized

Log<sub>2</sub> Ratios

| Protein  | SgFn vs Sg             |                      |         |         | Raw     |         | Normalized |          | Description                                    | Log <sub>2</sub> Ratios |    |    |   |   |
|----------|------------------------|----------------------|---------|---------|---------|---------|------------|----------|------------------------------------------------|-------------------------|----|----|---|---|
|          | Log <sub>2</sub> Ratio | Log <sub>2</sub> Sum | q-Value | p-Value | SgFn    | Sg      | SgFn       | Sg       |                                                | -6                      | -4 | -2 | 0 | 2 |
| SGO_0064 | -2.780                 | 8.948                | 0.0001  | 0.0000  | 16.000  | 214.000 | 34.8708    | 222.7119 | FtsK/SpoIIIE family protein                    |                         |    |    |   |   |
|          |                        |                      |         |         | 12.000  | 208.000 | 28.1611    | 208.0000 |                                                |                         |    |    |   |   |
| SGO_0065 | 0.041                  | 7.328                | 0.0927  | 0.5936  | 17.000  | 37.500  | 37.0502    | 39.0266  | hypothetical protein SGO_0065                  |                         |    |    |   |   |
|          |                        |                      |         |         | 19.000  | 40.000  | 44.5884    | 40.0000  |                                                |                         |    |    |   |   |
| SGO_0067 | -1.326                 | 6.056                | 0.0003  | 0.0004  | 5.000   | 23.000  | 10.8971    | 23.9363  | protein with prophage function domain          |                         |    |    |   |   |
|          |                        |                      |         |         | 3.500   | 23.500  | 8.2136     | 23.5000  |                                                |                         |    |    |   |   |
| SGO_0068 | -1.848                 | 6.075                | 0.0116  | 0.0478  |         | 30.000  |            | 31.2213  | lipoprotein, putative                          |                         |    |    |   |   |
|          |                        |                      |         |         | 3.500   | 28.000  | 8.2136     | 28.0000  |                                                |                         |    |    |   |   |
| SGO_0078 | -2.233                 | 5.972                | 0.0356  | 0.1899  |         | 34.000  |            | 35.3841  | hypothetical protein SGO_0078                  |                         |    |    |   |   |
|          |                        |                      |         |         | 2.500   | 21.500  | 5.8669     | 21.5000  |                                                |                         |    |    |   |   |
| SGO_0080 | -1.239                 | 7.315                | 0.0013  | 0.0026  | 13.500  | 51.000  | 29.4222    | 53.0762  | hypothetical protein SGO_0080                  |                         |    |    |   |   |
|          |                        |                      |         |         | 8.000   | 58.000  | 18.7741    | 58.0000  |                                                |                         |    |    |   |   |
| SGO_0081 | 1.176                  | 4.906                | 0.0041  | 0.0126  | 4.500   | 3.000   | 9.8074     | 3.1221   | hypothetical protein SGO_0081                  |                         |    |    |   |   |
|          |                        |                      |         |         | 4.500   | 6.500   | 10.5604    | 6.5000   |                                                |                         |    |    |   |   |
| SGO_0100 | 0.845                  | 4.371                | 0.0570  | 0.3329  |         | 7.500   |            | 7.8053   | maltose operon transcription repressor         |                         |    |    |   |   |
|          |                        |                      |         |         | 4.000   | 3.500   | 9.3870     | 3.5000   |                                                |                         |    |    |   |   |
| SGO_0104 | -0.242                 | 9.829                | 0.0207  | 0.0962  | 108.000 | 234.000 | 235.3776   | 243.5261 | Maltose/maltodextrin-binding protein precursor |                         |    |    |   |   |
|          |                        |                      |         |         | 78.000  | 247.500 | 183.0470   | 247.5000 |                                                |                         |    |    |   |   |
| SGO_0105 | 1.097                  | 6.362                | 0.0042  | 0.0127  | 15.000  | 14.000  | 32.6913    | 14.5699  | malQ; 4-alpha-glucanotransferase               |                         |    |    |   |   |
|          |                        |                      |         |         | 10.000  | 11.500  | 23.4676    | 11.5000  |                                                |                         |    |    |   |   |
| SGO_0106 | 2.848                  | 8.574                | 0.0005  | 0.0007  | 84.500  | 19.000  | 184.1612   | 19.7735  | glgP-2; maltodextrin phosphorylase             |                         |    |    |   |   |
|          |                        |                      |         |         | 64.000  | 27.000  | 150.1924   | 27.0000  |                                                |                         |    |    |   |   |
| SGO_0108 | -1.035                 | 6.092                | 0.0022  | 0.0058  | 4.000   | 22.500  | 8.7177     | 23.4160  | ruvB; Holliday junction DNA helicase RuvB      |                         |    |    |   |   |
|          |                        |                      |         |         | 6.000   | 22.000  | 14.0805    | 22.0000  |                                                |                         |    |    |   |   |

- Show detected proteins only  
 Show all proteins

Proteins found:  
769

Filter by category:

ABC Transporter

Test

Cutoff

q-Value

.005

p-Value

|             | Signif | Direction | Applies To   |
|-------------|--------|-----------|--------------|
| Red         | yes    | +         | ratios, bars |
| Yellow      | no     | n/a       | bars         |
| Green       | yes    | -         | ratios, bars |
| Pink        | yes    | +         | p-, q-Values |
| Light Green | yes    | -         | p-, q-Values |

Dot Plots Dot Plots

Summary Table

SgFn vs Sg

SgPg vs Sg

SgPgFn vs Sg

SgPg vs SgFn

SgPgFn vs SgFn

SgPgFn vs SgPg

Coverage

SgFn vs Sg

Raw

Normalized

Log<sub>2</sub> Ratios

| Protein  | SgFn vs Sg             |                      |         |         | Raw     |          | Normalized |           | Description                              | Log <sub>2</sub> Ratios |    |    |   |   |   |   |
|----------|------------------------|----------------------|---------|---------|---------|----------|------------|-----------|------------------------------------------|-------------------------|----|----|---|---|---|---|
|          | Log <sub>2</sub> Ratio | Log <sub>2</sub> Sum | q-Value | p-Value | SgFn    | Sg       | SgFn       | Sg        |                                          | -6                      | -4 | -2 | 0 | 2 | 4 | 6 |
| SGO_0113 | -2.089                 | 13.012               | 0.0001  | 0.0000  | 375.000 | 3329.000 | 817.2833   | 3464.5223 | acdH; alcohol-acetaldehyde dehydrogenase |                         |    |    |   |   |   |   |
|          |                        |                      |         |         | 321.500 | 3222.500 | 754.4823   | 3222.5000 |                                          |                         |    |    |   |   |   |   |
| SGO_0131 | -0.135                 | 6.282                | 0.0858  | 0.5442  | 9.000   | 11.000   | 19.6148    | 11.4478   | v-type sodium ATP synthase, chain E      |                         |    |    |   |   |   |   |
|          |                        |                      |         |         | 6.500   | 31.500   | 15.2539    | 31.5000   |                                          |                         |    |    |   |   |   |   |
| SGO_0134 | -0.328                 | 4.635                | 0.0580  | 0.3390  |         | 7.500    |            | 7.8053    | acetyltransferase, GNAT family           |                         |    |    |   |   |   |   |
|          |                        |                      |         |         | 3.000   | 10.000   | 7.0403     | 10.0000   |                                          |                         |    |    |   |   |   |   |
| SGO_0135 | -0.017                 | 8.321                | 0.1433  | 0.9713  | 41.500  | 77.500   | 90.4460    | 80.6550   | v-type sodium ATP synthase, subunit A    |                         |    |    |   |   |   |   |
|          |                        |                      |         |         | 29.500  | 79.500   | 69.2293    | 79.5000   |                                          |                         |    |    |   |   |   |   |
| SGO_0136 | -0.696                 | 8.587                | 0.0016  | 0.0037  | 35.500  | 106.000  | 77.3695    | 110.3152  | v-type sodium ATP synthase, chain B      |                         |    |    |   |   |   |   |
|          |                        |                      |         |         | 29.500  | 127.500  | 69.2293    | 127.5000  |                                          |                         |    |    |   |   |   |   |
| SGO_0138 | 0.579                  | 3.778                |         |         |         |          |            |           | LysM domain protein                      |                         |    |    |   |   |   |   |
|          |                        |                      |         |         | 3.500   | 5.500    | 8.2136     | 5.5000    |                                          |                         |    |    |   |   |   |   |
| SGO_0139 | 0.506                  | 7.391                | 0.0013  | 0.0027  | 21.500  | 32.000   | 46.8576    | 33.3027   | thrC; threonine synthase                 |                         |    |    |   |   |   |   |
|          |                        |                      |         |         | 22.000  | 36.000   | 51.6287    | 36.0000   |                                          |                         |    |    |   |   |   |   |
| SGO_0144 | -1.032                 | 5.671                | 0.0020  | 0.0050  | 4.500   | 15.000   | 9.8074     | 15.6106   | hypothetical protein SGO_0144            |                         |    |    |   |   |   |   |
|          |                        |                      |         |         | 3.000   | 18.500   | 7.0403     | 18.5000   |                                          |                         |    |    |   |   |   |   |
| SGO_0145 | 0.275                  | 8.112                | 0.0341  | 0.1807  | 41.500  | 61.500   | 90.4460    | 64.0036   | polI; DNA polymerase I                   |                         |    |    |   |   |   |   |
|          |                        |                      |         |         | 26.500  | 60.000   | 62.1891    | 60.0000   |                                          |                         |    |    |   |   |   |   |
| SGO_0146 | 1.056                  | 6.377                | 0.0048  | 0.0152  | 15.000  | 11.000   | 32.6913    | 11.4478   | CoA-binding domain protein               |                         |    |    |   |   |   |   |
|          |                        |                      |         |         | 10.000  | 15.500   | 23.4676    | 15.5000   |                                          |                         |    |    |   |   |   |   |
| SGO_0152 | 0.387                  | 5.773                | 0.0519  | 0.2961  | 10.500  | 10.500   | 22.8839    | 10.9275   | tgt; queuine tRNA-ribosyltransferase     |                         |    |    |   |   |   |   |
|          |                        |                      |         |         | 4.000   | 11.500   | 9.3870     | 11.5000   |                                          |                         |    |    |   |   |   |   |
| SGO_0154 | 1.787                  | 11.314               | 0.0007  | 0.0010  | 493.000 | 309.500  | 1074.4550  | 322.0996  | pgi; glucose-6-phosphate isomerase       |                         |    |    |   |   |   |   |
|          |                        |                      |         |         | 382.500 | 251.500  | 897.6345   | 251.5000  |                                          |                         |    |    |   |   |   |   |

- Show detected proteins only  
 Show all proteins

Proteins found:  
769

Filter by category:

ABC Transporter

Test

Cutoff

q-Value

.005

p-Value

|             | Signif | Direction | Applies To   |
|-------------|--------|-----------|--------------|
| Red         | yes    | +         | ratios, bars |
| Yellow      | no     | n/a       | bars         |
| Green       | yes    | -         | ratios, bars |
| Pink        | yes    | +         | p-, q-Values |
| Light Green | yes    | -         | p-, q-Values |

Dot Plots Dot Plots

Summary Table

SgFn vs Sg

SgPg vs Sg

SgPgFn vs Sg

SgPg vs SgFn

SgPgFn vs SgFn

SgPgFn vs SgPg

Coverage

SgFn vs Sg

Raw

Normalized

Log<sub>2</sub> Ratios

| Protein  | SgFn vs Sg             |                      |         |         | Raw    |        | Normalized |         | Description                                                                                         | Log <sub>2</sub> Ratios |    |    |   |   |
|----------|------------------------|----------------------|---------|---------|--------|--------|------------|---------|-----------------------------------------------------------------------------------------------------|-------------------------|----|----|---|---|
|          | Log <sub>2</sub> Ratio | Log <sub>2</sub> Sum | q-Value | p-Value | SgFn   | Sg     | SgFn       | Sg      |                                                                                                     | -6                      | -4 | -2 | 0 | 2 |
| SGO_0158 | 2.802                  | 8.548                | 0.0003  | 0.0002  | 70.000 | 24.500 | 152.5595   | 25.4974 | 2,3,4,5-tetrahydropyridine-2-carboxylate N-succinyltransferase, putative                            |                         |    |    |   |   |
|          |                        |                      |         |         | 74.500 | 21.500 | 174.8334   | 21.5000 |                                                                                                     |                         |    |    |   |   |
| SGO_0159 | 1.294                  | 3.787                |         |         | 4.500  |        | 9.8074     |         | hippurate hydrolase                                                                                 |                         |    |    |   |   |
|          |                        |                      |         |         |        | 4.000  |            | 4.0000  |                                                                                                     |                         |    |    |   |   |
| SGO_0163 | 0.563                  | 7.521                | 0.0030  | 0.0085  | 26.500 | 32.000 | 57.7547    | 33.3027 | galU; UTP-glucose-1-phosphate uridylyltransferase                                                   |                         |    |    |   |   |
|          |                        |                      |         |         | 22.000 | 41.000 | 51.6287    | 41.0000 |                                                                                                     |                         |    |    |   |   |
| SGO_0164 | 0.296                  | 7.639                | 0.0213  | 0.0992  | 22.000 | 40.000 | 47.9473    | 41.6284 | Glycerol-3-phosphate dehydrogenase [NAD(P)+] (NAD(P)H-dependent glycerol-3-phosphate dehydrogenase) |                         |    |    |   |   |
|          |                        |                      |         |         | 26.500 | 47.500 | 62.1891    | 47.5000 |                                                                                                     |                         |    |    |   |   |
| SGO_0168 | -0.600                 | 4.566                | 0.0250  | 0.1212  |        | 8.000  |            | 8.3257  | hydrolase, NUDIX family                                                                             |                         |    |    |   |   |
|          |                        |                      |         |         | 2.500  | 9.500  | 5.8669     | 9.5000  |                                                                                                     |                         |    |    |   |   |
| SGO_0169 | 1.929                  | 6.595                | 0.0023  | 0.0059  | 20.500 | 7.500  | 44.6782    | 7.8053  | dut; dUTP diphosphatase                                                                             |                         |    |    |   |   |
|          |                        |                      |         |         | 13.500 | 12.500 | 31.6812    | 12.5000 |                                                                                                     |                         |    |    |   |   |
| SGO_0171 | -0.989                 | 5.628                | 0.0409  | 0.2246  | 4.500  | 15.500 | 9.8074     | 16.1310 | radA; DNA repair protein RadA                                                                       |                         |    |    |   |   |
|          |                        |                      |         |         |        | 23.500 |            | 23.5000 |                                                                                                     |                         |    |    |   |   |
| SGO_0172 | -0.682                 | 6.005                | 0.0089  | 0.0337  | 7.000  | 24.000 | 15.2560    | 24.9770 | conserved hypothetical protein TIGR00266                                                            |                         |    |    |   |   |
|          |                        |                      |         |         |        | 24.000 |            | 24.0000 |                                                                                                     |                         |    |    |   |   |
| SGO_0173 | -1.237                 | 7.924                | 0.0003  | 0.0002  | 15.000 | 80.000 | 32.6913    | 83.2568 | Carbonic anhydrase                                                                                  |                         |    |    |   |   |
|          |                        |                      |         |         | 17.000 | 87.000 | 39.8949    | 87.0000 |                                                                                                     |                         |    |    |   |   |
| SGO_0174 | 0.758                  | 8.458                | 0.0073  | 0.0266  | 60.000 | 60.500 | 130.7653   | 62.9629 | gltX; glutamyl-tRNA synthetase                                                                      |                         |    |    |   |   |
|          |                        |                      |         |         | 39.000 | 66.500 | 91.5235    | 66.5000 |                                                                                                     |                         |    |    |   |   |
| SGO_0180 | -0.946                 | 6.660                | 0.0122  | 0.0506  | 6.500  | 24.000 | 14.1662    | 24.9770 | jag; hypothetical protein SGO_0180                                                                  |                         |    |    |   |   |
|          |                        |                      |         |         | 8.500  | 42.000 | 19.9474    | 42.0000 |                                                                                                     |                         |    |    |   |   |
| SGO_0182 | 0.723                  | 4.937                | 0.0798  | 0.4978  | 3.000  |        | 6.5383     |         | sapR; sakacin A production response regulator                                                       |                         |    |    |   |   |
|          |                        |                      |         |         | 7.500  | 6.500  | 17.6007    | 6.5000  |                                                                                                     |                         |    |    |   |   |

- Show detected proteins only  
 Show all proteins

Proteins found:  
769

Filter by category:

ABC Transporter

Test

Cutoff

q-Value

.005

p-Value

|             | Signif | Direction | Applies To   |
|-------------|--------|-----------|--------------|
| Red         | yes    | +         | ratios, bars |
| Yellow      | no     | n/a       | bars         |
| Green       | yes    | -         | ratios, bars |
| Pink        | yes    | +         | p-, q-Values |
| Light Green | yes    | -         | p-, q-Values |

Dot Plots Dot Plots

Summary Table

SgFn vs Sg

SgPg vs Sg

SgPgFn vs Sg

SgPg vs SgFn

SgPgFn vs SgFn

SgPgFn vs SgPg

Coverage

| Protein  | SgFn vs Sg             |                      |         |         | Raw      |          | Normalized |           | Description                                                | Log <sub>2</sub> Ratios |    |    |   |   |   |   |
|----------|------------------------|----------------------|---------|---------|----------|----------|------------|-----------|------------------------------------------------------------|-------------------------|----|----|---|---|---|---|
|          | Log <sub>2</sub> Ratio | Log <sub>2</sub> Sum | q-Value | p-Value | SgFn     | Sg       | SgFn       | Sg        |                                                            | -6                      | -4 | -2 | 0 | 2 | 4 | 6 |
| SGO_0188 | -0.017                 | 5.264                | 0.1383  | 0.9279  | 5.000    | 8.000    | 10.8971    | 8.3257    | hydrolase, TatD family                                     |                         |    |    |   |   |   |   |
|          |                        |                      |         |         | 3.500    | 11.000   | 8.2136     | 11.0000   |                                                            |                         |    |    |   |   |   |   |
| SGO_0193 | 0.004                  | 4.805                | 0.1428  | 0.9653  | 1.500    | 3.000    | 3.2691     | 3.1221    | ksgA; dimethyladenosine transferase                        |                         |    |    |   |   |   |   |
|          |                        |                      |         |         | 4.500    | 11.000   | 10.5604    | 11.0000   |                                                            |                         |    |    |   |   |   |   |
| SGO_0198 | 2.600                  | 8.472                | 0.0001  | 0.0001  | 67.000   | 27.500   | 146.0213   | 28.6195   | rpe; ribulose-phosphate 3-epimerase                        |                         |    |    |   |   |   |   |
|          |                        |                      |         |         | 67.500   | 22.000   | 158.4061   | 22.0000   |                                                            |                         |    |    |   |   |   |   |
| SGO_0200 | -1.421                 | 7.784                | 0.0001  | 0.0001  | 13.500   | 74.500   | 29.4222    | 77.5329   | competence-induced protein Ccs50                           |                         |    |    |   |   |   |   |
|          |                        |                      |         |         | 13.000   | 83.000   | 30.5078    | 83.0000   |                                                            |                         |    |    |   |   |   |   |
| SGO_0201 | 1.296                  | 8.289                | 0.0028  | 0.0079  | 43.000   | 47.000   | 93.7151    | 48.9134   | cmp-binding-factor 1                                       |                         |    |    |   |   |   |   |
|          |                        |                      |         |         | 55.000   | 41.000   | 129.0716   | 41.0000   |                                                            |                         |    |    |   |   |   |   |
| SGO_0202 | 0.149                  | 5.698                | 0.0870  | 0.5536  | 5.000    | 14.000   | 10.8971    | 14.5699   | pur operon repressor                                       |                         |    |    |   |   |   |   |
|          |                        |                      |         |         | 7.000    | 10.000   | 16.4273    | 10.0000   |                                                            |                         |    |    |   |   |   |   |
| SGO_0204 | -0.081                 | 8.109                | 0.1339  | 0.8941  | 39.500   | 63.500   | 86.0872    | 66.0851   | rpsL; ribosomal protein S12                                |                         |    |    |   |   |   |   |
|          |                        |                      |         |         | 21.500   | 73.500   | 50.4553    | 73.5000   |                                                            |                         |    |    |   |   |   |   |
| SGO_0205 | 0.380                  | 9.252                | 0.0236  | 0.1119  | 92.500   | 113.000  | 201.5965   | 117.6002  | rpsG; ribosomal protein S7                                 |                         |    |    |   |   |   |   |
|          |                        |                      |         |         | 61.500   | 146.000  | 144.3255   | 146.0000  |                                                            |                         |    |    |   |   |   |   |
| SGO_0206 | 0.449                  | 12.222               | 0.0005  | 0.0006  | 652.000  | 972.500  | 1420.9831  | 1012.0901 | fusA; translation elongation factor G                      |                         |    |    |   |   |   |   |
|          |                        |                      |         |         | 569.500  | 1007.500 | 1336.4780  | 1007.5000 |                                                            |                         |    |    |   |   |   |   |
| SGO_0207 | 1.189                  | 12.534               | 0.0005  | 0.0007  | 934.000  | 748.500  | 2035.5801  | 778.9711  | gap; glyceraldehyde-3-phosphate dehydrogenase, type I      |                         |    |    |   |   |   |   |
|          |                        |                      |         |         | 884.000  | 1043.000 | 2074.5331  | 1043.0000 |                                                            |                         |    |    |   |   |   |   |
| SGO_0208 | 0.596                  | 6.284                | 0.0337  | 0.1782  | 12.500   | 10.000   | 27.2428    | 10.4071   | LPXTG cell wall surface protein, glycosyl hydrolase family |                         |    |    |   |   |   |   |
|          |                        |                      |         |         | 8.000    | 21.500   | 18.7741    | 21.5000   |                                                            |                         |    |    |   |   |   |   |
| SGO_0209 | 1.455                  | 12.630               | 0.0002  | 0.0001  | 1110.000 | 845.500  | 2419.1584  | 879.9200  | pgk; phosphoglycerate kinase                               |                         |    |    |   |   |   |   |
|          |                        |                      |         |         | 949.000  | 814.500  | 2227.0723  | 814.5000  |                                                            |                         |    |    |   |   |   |   |

- Show detected proteins only
- Show all proteins

Proteins found: 769

Filter by category:  
ABC Transporter

**Test**      **Cutoff**

    

    

|             | Signif | Direction | Applies To   |
|-------------|--------|-----------|--------------|
| Red         | yes    | +         | ratios, bars |
| Yellow      | no     | n/a       | bars         |
| Green       | yes    | -         | ratios, bars |
| Pink        | yes    | +         | p-, q-Values |
| Light Green | yes    | -         | p-, q-Values |

[Dot Plots](#)  [Dot Plots](#)

Summary Table

SgFn vs Sg

SgPg vs Sg

SgPgFn vs Sg

SgPg vs SgFn

SgPgFn vs SgFn

SgPgFn vs SgPg

Coverage

SgFn vs Sg

Raw

Normalized

Log<sub>2</sub> Ratios

| Protein  | SgFn vs Sg             |                      |         |         | Raw     |         | Normalized |          | Description                                  | Log <sub>2</sub> Ratios |    |    |   |   |   |   |
|----------|------------------------|----------------------|---------|---------|---------|---------|------------|----------|----------------------------------------------|-------------------------|----|----|---|---|---|---|
|          | Log <sub>2</sub> Ratio | Log <sub>2</sub> Sum | q-Value | p-Value | SgFn    | Sg      | SgFn       | Sg       |                                              | -6                      | -4 | -2 | 0 | 2 | 4 | 6 |
| SGO_0210 | -0.950                 | 8.543                | 0.0059  | 0.0198  | 33.500  | 98.500  | 73.0106    | 102.5099 | sspA; streptococcal surface protein A        |                         |    |    |   |   |   |   |
|          |                        |                      |         |         | 23.000  | 143.500 | 53.9754    | 143.5000 |                                              |                         |    |    |   |   |   |   |
| SGO_0211 | -4.047                 | 9.262                | 0.0003  | 0.0003  | 8.500   | 254.000 | 18.5251    | 264.3402 | sspB; streptococcal surface protein B        |                         |    |    |   |   |   |   |
|          |                        |                      |         |         | 7.000   | 314.500 | 16.4273    | 314.5000 |                                              |                         |    |    |   |   |   |   |
| SGO_0215 | 0.153                  | 8.746                | 0.0017  | 0.0040  | 51.500  | 95.500  | 112.2402   | 99.3878  | glnA; glutamine synthetase, type I           |                         |    |    |   |   |   |   |
|          |                        |                      |         |         | 48.500  | 104.000 | 113.8177   | 104.0000 |                                              |                         |    |    |   |   |   |   |
| SGO_0219 | -0.136                 | 8.107                | 0.0278  | 0.1417  | 29.000  | 74.500  | 63.2032    | 77.5329  | metallo-beta-lactamase superfamily protein 1 |                         |    |    |   |   |   |   |
|          |                        |                      |         |         | 29.000  | 67.000  | 68.0559    | 67.0000  |                                              |                         |    |    |   |   |   |   |
| SGO_0223 | 0.818                  | 4.028                | 0.0150  | 0.0659  | 3.500   | 4.500   | 7.6280     | 4.6832   | glycoproteinase family protein               |                         |    |    |   |   |   |   |
|          |                        |                      |         |         |         | 4.000   |            | 4.0000   |                                              |                         |    |    |   |   |   |   |
| SGO_0230 | -0.275                 | 5.406                | 0.1056  | 0.6858  | 6.500   | 9.000   | 14.1662    | 9.3664   | Protein of unknown function, DUF536 family   |                         |    |    |   |   |   |   |
|          |                        |                      |         |         | 2.500   | 13.000  | 5.8669     | 13.0000  |                                              |                         |    |    |   |   |   |   |
| SGO_0233 | -1.071                 | 6.570                | 0.0111  | 0.0442  | 4.500   | 35.000  | 9.8074     | 36.4248  | lipoprotein, putative                        |                         |    |    |   |   |   |   |
|          |                        |                      |         |         | 9.500   | 26.500  | 22.2942    | 26.5000  |                                              |                         |    |    |   |   |   |   |
| SGO_0234 | 0.223                  | 7.887                | 0.0036  | 0.0108  | 30.500  | 53.000  | 66.4724    | 55.1576  | pepX; X-Pro dipeptidyl-peptidase             |                         |    |    |   |   |   |   |
|          |                        |                      |         |         | 26.000  | 54.000  | 61.0157    | 54.0000  |                                              |                         |    |    |   |   |   |   |
| SGO_0237 | 0.811                  | 5.501                | 0.0302  | 0.1571  | 4.500   | 5.000   | 9.8074     | 5.2035   | ccpA; CcpA protein (proteinase)              |                         |    |    |   |   |   |   |
|          |                        |                      |         |         | 8.000   | 11.500  | 18.7741    | 11.5000  |                                              |                         |    |    |   |   |   |   |
| SGO_0242 | 1.066                  | 2.687                |         |         | 2.000   | 2.000   | 4.3588     | 2.0814   | FMN-dependent dehydrogenase family protein   |                         |    |    |   |   |   |   |
|          |                        |                      |         |         |         |         |            |          |                                              |                         |    |    |   |   |   |   |
| SGO_0244 | 2.219                  | 5.446                | 0.0014  | 0.0029  | 9.500   | 3.500   | 20.7045    | 3.6425   | hydroxymethylglutaryl-CoA synthase           |                         |    |    |   |   |   |   |
|          |                        |                      |         |         | 6.500   | 4.000   | 15.2539    | 4.0000   |                                              |                         |    |    |   |   |   |   |
| SGO_0247 | -0.232                 | 11.349               | 0.0506  | 0.2878  | 223.500 | 709.000 | 487.1008   | 737.8631 | pfl; formate acetyltransferase               |                         |    |    |   |   |   |   |
|          |                        |                      |         |         | 308.500 | 659.000 | 723.9745   | 659.0000 |                                              |                         |    |    |   |   |   |   |

 Show detected proteins only Show all proteinsProteins found:  
769 Filter by category:

ABC Transporter

Test

Cutoff

q-Value

.005

p-Value

|             | Signif | Direction | Applies To   |
|-------------|--------|-----------|--------------|
| Red         | yes    | +         | ratios, bars |
| Yellow      | no     | n/a       | bars         |
| Green       | yes    | -         | ratios, bars |
| Pink        | yes    | +         | p-, q-Values |
| Light Green | yes    | -         | p-, q-Values |

Dot Plots Dot Plots

Summary Table

SgFn vs Sg

SgPg vs Sg

SgPgFn vs Sg

SgPg vs SgFn

SgPgFn vs SgFn

SgPgFn vs SgPg

Coverage

SgFn vs Sg

Raw

Normalized

Log<sub>2</sub> Ratios

| Protein  | SgFn vs Sg             |                      |         |         | Raw     |         | Normalized |          | Description                                            | Log <sub>2</sub> Ratios |    |    |   |   |   |   |
|----------|------------------------|----------------------|---------|---------|---------|---------|------------|----------|--------------------------------------------------------|-------------------------|----|----|---|---|---|---|
|          | Log <sub>2</sub> Ratio | Log <sub>2</sub> Sum | q-Value | p-Value | SgFn    | Sg      | SgFn       | Sg       |                                                        | -6                      | -4 | -2 | 0 | 2 | 4 | 6 |
| SGO_0252 | 0.478                  | 5.107                | 0.0169  | 0.0754  | 5.500   | 6.500   | 11.9868    | 6.7646   | possible TetR-type transcriptional regulator           |                         |    |    |   |   |   |   |
|          |                        |                      |         |         | 3.500   | 7.500   | 8.2136     | 7.5000   |                                                        |                         |    |    |   |   |   |   |
| SGO_0255 | -1.915                 | 7.565                | 0.0021  | 0.0053  | 10.000  | 84.500  | 21.7942    | 87.9400  | Signal peptidase I                                     |                         |    |    |   |   |   |   |
|          |                        |                      |         |         | 7.500   | 62.000  | 17.6007    | 62.0000  |                                                        |                         |    |    |   |   |   |   |
| SGO_0256 | 0.549                  | 4.962                | 0.0603  | 0.3566  |         | 6.500   |            | 6.7646   | rnhC; ribonuclease HIII                                |                         |    |    |   |   |   |   |
|          |                        |                      |         |         | 5.500   | 11.500  | 12.9072    | 11.5000  |                                                        |                         |    |    |   |   |   |   |
| SGO_0258 | 1.231                  | 3.328                |         |         |         |         |            |          | hypothetical protein SGO_0258                          |                         |    |    |   |   |   |   |
|          |                        |                      |         |         | 3.000   | 3.000   | 7.0403     | 3.0000   |                                                        |                         |    |    |   |   |   |   |
| SGO_0260 | -0.703                 | 6.887                | 0.0044  | 0.0135  | 8.500   | 33.500  | 18.5251    | 34.8638  | DNA mismatch binding protein MutS2                     |                         |    |    |   |   |   |   |
|          |                        |                      |         |         | 11.500  | 38.000  | 26.9877    | 38.0000  |                                                        |                         |    |    |   |   |   |   |
| SGO_0262 | 0.568                  | 6.914                | 0.0032  | 0.0094  | 18.000  | 24.500  | 39.2296    | 25.4974  | dipeptidase                                            |                         |    |    |   |   |   |   |
|          |                        |                      |         |         | 14.000  | 23.000  | 32.8546    | 23.0000  |                                                        |                         |    |    |   |   |   |   |
| SGO_0263 | 0.095                  | 7.290                | 0.0900  | 0.5751  | 14.000  | 34.000  | 30.5119    | 35.3841  | trx-1; thioredoxin                                     |                         |    |    |   |   |   |   |
|          |                        |                      |         |         | 22.000  | 39.000  | 51.6287    | 39.0000  |                                                        |                         |    |    |   |   |   |   |
| SGO_0272 | 0.119                  | 6.592                | 0.0674  | 0.4081  | 13.500  | 22.500  | 29.4222    | 23.4160  | hypothetical protein SGO_0272                          |                         |    |    |   |   |   |   |
|          |                        |                      |         |         | 9.000   | 22.500  | 21.1208    | 22.5000  |                                                        |                         |    |    |   |   |   |   |
| SGO_0276 | 0.718                  | 9.428                | 0.0029  | 0.0083  | 108.500 | 132.500 | 236.4673   | 137.8940 | gdhA; glutamate dehydrogenase (NADP)                   |                         |    |    |   |   |   |   |
|          |                        |                      |         |         | 82.000  | 122.000 | 192.4341   | 122.0000 |                                                        |                         |    |    |   |   |   |   |
| SGO_0277 | 0.354                  | 6.057                | 0.0447  | 0.2509  | 6.500   | 11.500  | 14.1662    | 11.9682  | pyrA; Dihydroorotate dehydrogenase                     |                         |    |    |   |   |   |   |
|          |                        |                      |         |         | 10.000  | 17.000  | 23.4676    | 17.0000  |                                                        |                         |    |    |   |   |   |   |
| SGO_0278 | 1.709                  | 3.094                |         |         | 3.000   |         | 6.5383     |          | msrA; Peptide methionine sulfoxide reductase msrA/msrB |                         |    |    |   |   |   |   |
|          |                        |                      |         |         |         | 2.000   |            | 2.0000   |                                                        |                         |    |    |   |   |   |   |
| SGO_0280 | 0.678                  | 7.016                | 0.0256  | 0.1260  | 25.000  | 24.000  | 54.4856    | 24.9770  | trzA; ethylammine chlorohydrolase                      |                         |    |    |   |   |   |   |
|          |                        |                      |         |         | 11.500  | 23.000  | 26.9877    | 23.0000  |                                                        |                         |    |    |   |   |   |   |

- Show detected proteins only  
 Show all proteins

Proteins found:  
769

Filter by category:

ABC Transporter

Test

Cutoff

q-Value

.005

p-Value

|             | Signif | Direction | Applies To   |
|-------------|--------|-----------|--------------|
| Red         | yes    | +         | ratios, bars |
| Yellow      | no     | n/a       | bars         |
| Green       | yes    | -         | ratios, bars |
| Pink        | yes    | +         | p-, q-Values |
| Light Green | yes    | -         | p-, q-Values |

Dot Plots Dot Plots



Summary Table

SgFn vs Sg

SgPg vs Sg

SgPgFn vs Sg

SgPg vs SgFn

SgPgFn vs SgFn

SgPgFn vs SgPg

Coverage

| Protein  | SgFn vs Sg             |                      |         |         | Raw     |         | Normalized |          | Description                                                                   | Log <sub>2</sub> Ratios |    |    |   |   |
|----------|------------------------|----------------------|---------|---------|---------|---------|------------|----------|-------------------------------------------------------------------------------|-------------------------|----|----|---|---|
|          | Log <sub>2</sub> Ratio | Log <sub>2</sub> Sum | q-Value | p-Value | SgFn    | Sg      | SgFn       | Sg       |                                                                               | -6                      | -4 | -2 | 0 | 2 |
| SGO_0286 | -1.447                 | 5.729                | 0.0117  | 0.0484  |         | 20.500  |            | 21.3345  | DNA mismatch repair protein MutS, putative                                    |                         |    |    |   |   |
|          |                        |                      |         |         | 3.500   | 23.500  | 8.2136     | 23.5000  |                                                                               |                         |    |    |   |   |
| SGO_0291 | -1.699                 | 7.622                | 0.0005  | 0.0008  | 11.000  | 78.500  | 23.9736    | 81.6957  | copper-translocating P-type ATPase                                            |                         |    |    |   |   |
|          |                        |                      |         |         | 9.500   | 69.000  | 22.2942    | 69.0000  |                                                                               |                         |    |    |   |   |
| SGO_0292 | -1.515                 | 8.103                | 0.0001  | 0.0000  | 15.500  | 100.000 | 33.7810    | 104.0710 | spxB; pyruvate oxidase                                                        |                         |    |    |   |   |
|          |                        |                      |         |         | 16.000  | 99.500  | 37.5481    | 99.5000  |                                                                               |                         |    |    |   |   |
| SGO_0297 | 2.180                  | 5.828                | 0.0348  | 0.1852  | 9.000   |         | 19.6148    |          | 6-phospho-beta-glucosidase                                                    |                         |    |    |   |   |
|          |                        |                      |         |         | 13.500  | 5.500   | 31.6812    | 5.5000   |                                                                               |                         |    |    |   |   |
| SGO_0310 | 2.302                  | 4.772                | 0.0011  | 0.0022  | 4.500   | 2.500   | 9.8074     | 2.6018   | metE; 5-methyltetrahydropteroyltriglutamate--homocysteine S-methyltransferase |                         |    |    |   |   |
|          |                        |                      |         |         | 5.500   | 2.000   | 12.9072    | 2.0000   |                                                                               |                         |    |    |   |   |
| SGO_0312 | 1.214                  | 11.377               | 0.0002  | 0.0002  | 444.000 | 387.000 | 967.6634   | 402.7546 | xfp; D-xylulose 5-phosphate/D-fructose 6-phosphate phosphoketolase            |                         |    |    |   |   |
|          |                        |                      |         |         | 380.000 | 398.000 | 891.7676   | 398.0000 |                                                                               |                         |    |    |   |   |
| SGO_0321 | 1.577                  | 7.033                | 0.0012  | 0.0024  | 23.500  | 11.500  | 51.2164    | 11.9682  | polypeptide deformylase                                                       |                         |    |    |   |   |
|          |                        |                      |         |         | 19.500  | 22.000  | 45.7618    | 22.0000  |                                                                               |                         |    |    |   |   |
| SGO_0327 | 0.798                  | 3.924                | 0.0200  | 0.0913  |         | 3.500   |            | 3.6425   | Lipopolysaccharide N-acetylglucosaminyltransferase                            |                         |    |    |   |   |
|          |                        |                      |         |         | 3.000   | 4.500   | 7.0403     | 4.5000   |                                                                               |                         |    |    |   |   |
| SGO_0333 | -0.323                 | 8.323                | 0.0334  | 0.1757  | 39.500  | 77.500  | 86.0872    | 80.6550  | rpsO; ribosomal protein S15                                                   |                         |    |    |   |   |
|          |                        |                      |         |         | 24.500  | 96.000  | 57.4955    | 96.0000  |                                                                               |                         |    |    |   |   |
| SGO_0339 | 3.050                  | 5.724                | 0.0138  | 0.0594  | 10.500  |         | 22.8839    |          | hypothetical protein SGO_0339                                                 |                         |    |    |   |   |
|          |                        |                      |         |         | 11.500  | 3.000   | 26.9877    | 3.0000   |                                                                               |                         |    |    |   |   |
| SGO_0342 | 1.201                  | 8.387                | 0.0004  | 0.0004  | 56.500  | 47.500  | 123.1373   | 49.4337  | pepF-2; oligoendopeptidase                                                    |                         |    |    |   |   |
|          |                        |                      |         |         | 47.000  | 52.000  | 110.2976   | 52.0000  |                                                                               |                         |    |    |   |   |
| SGO_0344 | 0.219                  | 9.215                | 0.0124  | 0.0516  | 79.000  | 128.500 | 172.1743   | 133.7312 | pnpA; polyribonucleotide nucleotidyltransferase                               |                         |    |    |   |   |
|          |                        |                      |         |         | 63.000  | 140.500 | 147.8457   | 140.5000 |                                                                               |                         |    |    |   |   |

- Show detected proteins only
- Show all proteins

Proteins found: 769

Filter by category:

ABC Transporter

Test

Cutoff

q-Value

.005

p-Value

|             | Signif | Direction | Applies To   |
|-------------|--------|-----------|--------------|
| Red         | yes    | +         | ratios, bars |
| Yellow      | no     | n/a       | bars         |
| Green       | yes    | -         | ratios, bars |
| Pink        | yes    | +         | p-, q-Values |
| Light Green | yes    | -         | p-, q-Values |

Dot Plots Dot Plots

Summary Table

SgFn vs Sg

SgPg vs Sg

SgPgFn vs Sg

SgPg vs SgFn

SgPgFn vs SgFn

SgPgFn vs SgPg

Coverage

SgFn vs Sg

Raw

Normalized

Log<sub>2</sub> Ratios

| Protein  | SgFn vs Sg             |                      |         |         | Raw     |         | Normalized |          | Description                                  | Log <sub>2</sub> Ratios |    |    |   |   |   |   |
|----------|------------------------|----------------------|---------|---------|---------|---------|------------|----------|----------------------------------------------|-------------------------|----|----|---|---|---|---|
|          | Log <sub>2</sub> Ratio | Log <sub>2</sub> Sum | q-Value | p-Value | SgFn    | Sg      | SgFn       | Sg       |                                              | -6                      | -4 | -2 | 0 | 2 | 4 | 6 |
| SGO_0348 | -0.407                 | 4.511                |         |         | 4.500   |         | 9.8074     |          | reductase                                    |                         |    |    |   |   |   |   |
|          |                        |                      |         |         |         | 13.000  |            | 13.0000  |                                              |                         |    |    |   |   |   |   |
| SGO_0349 | 0.798                  | 7.081                | 0.0084  | 0.0315  | 16.000  | 22.000  | 34.8708    | 22.8956  | cysS; cysteinyl-tRNA synthetase              |                         |    |    |   |   |   |   |
|          |                        |                      |         |         | 22.000  | 26.000  | 51.6287    | 26.0000  |                                              |                         |    |    |   |   |   |   |
| SGO_0352 | -0.349                 | 7.992                | 0.0015  | 0.0032  | 25.000  | 66.000  | 54.4856    | 68.6868  | ABC transporter, ATP-binding protein SP1580  |                         |    |    |   |   |   |   |
|          |                        |                      |         |         | 24.500  | 74.000  | 57.4955    | 74.0000  |                                              |                         |    |    |   |   |   |   |
| SGO_0353 | 1.406                  | 4.544                | 0.0136  | 0.0580  | 2.500   | 3.500   | 5.4486     | 3.6425   | transport protein                            |                         |    |    |   |   |   |   |
|          |                        |                      |         |         | 5.000   | 2.500   | 11.7338    | 2.5000   |                                              |                         |    |    |   |   |   |   |
| SGO_0355 | 0.730                  | 5.564                | 0.0047  | 0.0149  | 6.000   | 7.500   | 13.0765    | 7.8053   | RNA methyltransferase, TrmH family, group 3  |                         |    |    |   |   |   |   |
|          |                        |                      |         |         | 7.000   | 10.000  | 16.4273    | 10.0000  |                                              |                         |    |    |   |   |   |   |
| SGO_0357 | 1.098                  | 7.238                | 0.0022  | 0.0058  | 23.000  | 17.500  | 50.1267    | 18.2124  | degV; DegV family fatty acid binding protein |                         |    |    |   |   |   |   |
|          |                        |                      |         |         | 22.000  | 31.000  | 51.6287    | 31.0000  |                                              |                         |    |    |   |   |   |   |
| SGO_0358 | 0.443                  | 9.550                | 0.0112  | 0.0451  | 108.500 | 133.000 | 236.4673   | 138.4144 | rplM; ribosomal protein L13                  |                         |    |    |   |   |   |   |
|          |                        |                      |         |         | 83.000  | 180.000 | 194.7808   | 180.0000 |                                              |                         |    |    |   |   |   |   |
| SGO_0359 | -0.649                 | 8.262                | 0.0156  | 0.0689  | 34.500  | 76.000  | 75.1901    | 79.0939  | rpsI; ribosomal protein S9                   |                         |    |    |   |   |   |   |
|          |                        |                      |         |         | 19.500  | 107.000 | 45.7618    | 107.0000 |                                              |                         |    |    |   |   |   |   |
| SGO_0361 | 0.296                  | 4.951                | 0.0570  | 0.3323  | 3.000   | 8.000   | 6.5383     | 8.3257   | immunity repressor protein                   |                         |    |    |   |   |   |   |
|          |                        |                      |         |         | 4.500   | 5.500   | 10.5604    | 5.5000   |                                              |                         |    |    |   |   |   |   |
| SGO_0368 | 1.733                  | 4.471                | 0.0048  | 0.0150  | 3.000   | 2.000   | 6.5383     | 2.0814   | merA; mercury(II) reductase                  |                         |    |    |   |   |   |   |
|          |                        |                      |         |         | 4.500   | 3.000   | 10.5604    | 3.0000   |                                              |                         |    |    |   |   |   |   |
| SGO_0372 | 1.711                  | 6.450                | 0.0017  | 0.0040  | 17.000  | 13.000  | 37.0502    | 13.5292  | malate oxidoreductase                        |                         |    |    |   |   |   |   |
|          |                        |                      |         |         | 12.500  | 7.500   | 29.3345    | 7.5000   |                                              |                         |    |    |   |   |   |   |
| SGO_0374 | 0.739                  | 6.858                | 0.0028  | 0.0079  | 15.000  | 22.500  | 32.6913    | 23.4160  | Response regulator of the LytR/AlgR family   |                         |    |    |   |   |   |   |
|          |                        |                      |         |         | 17.000  | 20.000  | 39.8949    | 20.0000  |                                              |                         |    |    |   |   |   |   |

- Show detected proteins only  
 Show all proteins

Proteins found:  
769

Filter by category:

ABC Transporter

Test

Cutoff

q-Value

.005

p-Value

|             | Signif | Direction | Applies To   |
|-------------|--------|-----------|--------------|
| Red         | yes    | +         | ratios, bars |
| Yellow      | no     | n/a       | bars         |
| Green       | yes    | -         | ratios, bars |
| Pink        | yes    | +         | p-, q-Values |
| Light Green | yes    | -         | p-, q-Values |

Dot Plots Dot Plots

Summary Table

SgFn vs Sg

SgPg vs Sg

SgPgFn vs Sg

SgPg vs SgFn

SgPgFn vs SgFn

SgPgFn vs SgPg

Coverage

SgFn vs Sg

Raw

Normalized

Log<sub>2</sub> Ratios

| Protein  | SgFn vs Sg             |                      |         |         | Raw     |         | Normalized |          | Description                                                   | Log <sub>2</sub> Ratios |    |    |   |   |   |   |
|----------|------------------------|----------------------|---------|---------|---------|---------|------------|----------|---------------------------------------------------------------|-------------------------|----|----|---|---|---|---|
|          | Log <sub>2</sub> Ratio | Log <sub>2</sub> Sum | q-Value | p-Value | SgFn    | Sg      | SgFn       | Sg       |                                                               | -6                      | -4 | -2 | 0 | 2 | 4 | 6 |
| SGO_0384 | -0.291                 | 5.820                | 0.0649  | 0.3905  | 4.500   | 10.500  | 9.8074     | 10.9275  | putative carboxylate-amine/thiol ligase                       |                         |    |    |   |   |   |   |
|          |                        |                      |         |         | 6.500   | 20.500  | 15.2539    | 20.5000  |                                                               |                         |    |    |   |   |   |   |
| SGO_0385 | 0.670                  | 7.728                | 0.0026  | 0.0070  | 27.000  | 39.500  | 58.8444    | 41.1080  | exo-beta-D-fructosidase                                       |                         |    |    |   |   |   |   |
|          |                        |                      |         |         | 30.500  | 40.500  | 71.5761    | 40.5000  |                                                               |                         |    |    |   |   |   |   |
| SGO_0388 | 0.224                  | 7.351                | 0.0555  | 0.3217  | 19.500  | 29.000  | 42.4987    | 30.1806  | LPXTG cell wall surface protein, zinc carboxypeptidase family |                         |    |    |   |   |   |   |
|          |                        |                      |         |         | 19.000  | 46.000  | 44.5884    | 46.0000  |                                                               |                         |    |    |   |   |   |   |
| SGO_0389 | 3.458                  | 5.613                | 0.0418  | 0.2326  | 7.000   |         | 15.2560    |          | possible phosphoserine phosphatase                            |                         |    |    |   |   |   |   |
|          |                        |                      |         |         | 13.500  | 2.000   | 31.6812    | 2.0000   |                                                               |                         |    |    |   |   |   |   |
| SGO_0390 | 1.938                  | 8.321                | 0.0014  | 0.0028  | 66.500  | 30.000  | 144.9316   | 31.2213  | glycerol-3-phosphate dehydrogenase (NAD (P)+)                 |                         |    |    |   |   |   |   |
|          |                        |                      |         |         | 46.500  | 34.500  | 109.1242   | 34.5000  |                                                               |                         |    |    |   |   |   |   |
| SGO_0392 | 3.821                  | 6.458                | 0.0090  | 0.0344  | 18.500  |         | 40.3193    |          | phosphoglycerate mutase                                       |                         |    |    |   |   |   |   |
|          |                        |                      |         |         | 19.000  | 3.000   | 44.5884    | 3.0000   |                                                               |                         |    |    |   |   |   |   |
| SGO_0393 | -0.858                 | 5.430                | 0.0702  | 0.4299  | 4.000   | 10.000  | 8.7177     | 10.4071  | D-alanyl-D-alanine carboxypeptidase                           |                         |    |    |   |   |   |   |
|          |                        |                      |         |         |         | 24.000  |            | 24.0000  |                                                               |                         |    |    |   |   |   |   |
| SGO_0398 | -1.902                 | 7.059                | 0.0021  | 0.0053  | 5.000   | 58.500  | 10.8971    | 60.8815  | ABC transporter ATP-binding protein                           |                         |    |    |   |   |   |   |
|          |                        |                      |         |         | 7.500   | 44.000  | 17.6007    | 44.0000  |                                                               |                         |    |    |   |   |   |   |
| SGO_0400 | 0.608                  | 4.887                | 0.0421  | 0.2346  | 6.500   | 5.500   | 14.1662    | 5.7239   | hrcA; heat-inducible transcription repressor HrcA             |                         |    |    |   |   |   |   |
|          |                        |                      |         |         | 2.000   | 5.000   | 4.6935     | 5.0000   |                                                               |                         |    |    |   |   |   |   |
| SGO_0401 | 0.727                  | 7.007                | 0.0294  | 0.1511  | 16.500  | 14.000  | 35.9605    | 14.5699  | grpE; co-chaperone GrpE                                       |                         |    |    |   |   |   |   |
|          |                        |                      |         |         | 17.500  | 37.000  | 41.0682    | 37.0000  |                                                               |                         |    |    |   |   |   |   |
| SGO_0402 | 1.202                  | 11.615               | 0.0001  | 0.0001  | 492.500 | 434.500 | 1073.3653  | 452.1883 | dnaK; DnaK chaperone protein                                  |                         |    |    |   |   |   |   |
|          |                        |                      |         |         | 474.000 | 499.000 | 1112.3628  | 499.0000 |                                                               |                         |    |    |   |   |   |   |
| SGO_0404 | -2.009                 | 7.978                | 0.0052  | 0.0171  | 10.500  | 71.000  | 22.8839    | 73.8904  | dnaJ; DnaJ chaperone protein                                  |                         |    |    |   |   |   |   |
|          |                        |                      |         |         | 11.000  | 129.500 | 25.8143    | 129.5000 |                                                               |                         |    |    |   |   |   |   |

- Show detected proteins only  
 Show all proteins

Proteins found:  
769

Filter by category:

ABC Transporter

Test

Cutoff

q-Value

.005

p-Value

|             | Signif | Direction | Applies To   |
|-------------|--------|-----------|--------------|
| Red         | yes    | +         | ratios, bars |
| Yellow      | no     | n/a       | bars         |
| Green       | yes    | -         | ratios, bars |
| Pink        | yes    | +         | p-, q-Values |
| Light Green | yes    | -         | p-, q-Values |

Dot Plots Dot Plots

Summary Table

SgFn vs Sg

SgPg vs Sg

SgPgFn vs Sg

SgPg vs SgFn

SgPgFn vs SgFn

SgPgFn vs SgPg

Coverage

| Protein  | SgFn vs Sg             |                      |         |         | Raw     |         | Normalized |          | Description                                            | Log <sub>2</sub> Ratios |    |    |   |   |   |   |
|----------|------------------------|----------------------|---------|---------|---------|---------|------------|----------|--------------------------------------------------------|-------------------------|----|----|---|---|---|---|
|          | Log <sub>2</sub> Ratio | Log <sub>2</sub> Sum | q-Value | p-Value | SgFn    | Sg      | SgFn       | Sg       |                                                        | -6                      | -4 | -2 | 0 | 2 | 4 | 6 |
| SGO_0407 | 1.455                  | 4.510                | 0.0205  | 0.0948  | 4.000   |         | 8.7177     |          | truA; tRNA pseudouridine synthase A                    |                         |    |    |   |   |   |   |
|          |                        |                      |         |         | 4.500   | 3.500   | 10.5604    | 3.5000   |                                                        | ■                       |    |    |   |   |   |   |
| SGO_0409 | 7.517                  | 9.176                | 0.0184  | 0.0834  | 115.000 | 1.500   | 250.6335   | 1.5611   | pyridoxine kinase                                      |                         |    |    |   |   |   |   |
|          |                        |                      |         |         | 139.000 |         | 326.1992   |          |                                                        | ■                       |    |    |   |   |   |   |
| SGO_0412 | 0.157                  | 10.717               | 0.0298  | 0.1538  | 216.500 | 353.500 | 471.8449   | 367.8908 | tig; trigger factor                                    |                         |    |    |   |   |   |   |
|          |                        |                      |         |         | 177.000 | 428.500 | 415.3760   | 428.5000 |                                                        |                         |    |    |   |   |   |   |
| SGO_0413 | 2.206                  | 7.129                | 0.0003  | 0.0004  | 25.000  | 15.500  | 54.4856    | 16.1310  | DNA-directed RNA polymerase delta chain                |                         |    |    |   |   |   |   |
|          |                        |                      |         |         | 25.500  | 9.500   | 59.8423    | 9.5000   |                                                        | ■                       |    |    |   |   |   |   |
| SGO_0415 | -1.134                 | 10.674               | 0.0005  | 0.0007  | 125.500 | 569.500 | 273.5175   | 592.6841 | secA; preprotein translocase, SecA subunit             |                         |    |    |   |   |   |   |
|          |                        |                      |         |         | 101.500 | 529.500 | 238.1958   | 529.5000 |                                                        | ■                       |    |    |   |   |   |   |
| SGO_0416 | 1.455                  | 7.692                | 0.0001  | 0.0001  | 35.000  | 24.000  | 76.2798    | 24.9770  | phospho-2-dehydro-3-deoxyheptonate aldolase            |                         |    |    |   |   |   |   |
|          |                        |                      |         |         | 32.000  | 30.500  | 75.0962    | 30.5000  |                                                        | ■                       |    |    |   |   |   |   |
| SGO_0425 | 2.236                  | 3.572                |         |         | 4.500   | 2.000   | 9.8074     | 2.0814   | ansB; asparaginase                                     |                         |    |    |   |   |   |   |
|          |                        |                      |         |         |         |         |            |          |                                                        | ■                       |    |    |   |   |   |   |
| SGO_0426 | 0.886                  | 6.136                | 0.0062  | 0.0214  | 9.000   | 9.500   | 19.6148    | 9.8867   | Cof family protein                                     |                         |    |    |   |   |   |   |
|          |                        |                      |         |         | 11.000  | 15.000  | 25.8143    | 15.0000  |                                                        | ■                       |    |    |   |   |   |   |
| SGO_0427 | 3.220                  | 7.650                | 0.0005  | 0.0006  | 37.500  | 9.500   | 81.7283    | 9.8867   | universal stress protein family                        |                         |    |    |   |   |   |   |
|          |                        |                      |         |         | 42.500  | 9.500   | 99.7372    | 9.5000   |                                                        | ■                       |    |    |   |   |   |   |
| SGO_0429 | -0.087                 | 9.283                | 0.0341  | 0.1809  | 67.000  | 162.000 | 146.0213   | 168.5950 | aspartate transaminase                                 |                         |    |    |   |   |   |   |
|          |                        |                      |         |         | 66.500  | 152.500 | 156.0593   | 152.5000 |                                                        |                         |    |    |   |   |   |   |
| SGO_0430 | -2.297                 | 9.650                | 0.0001  | 0.0000  | 34.000  | 314.000 | 74.1003    | 326.7828 | LPXTG cell wall surface protein                        |                         |    |    |   |   |   |   |
|          |                        |                      |         |         | 26.500  | 340.500 | 62.1891    | 340.5000 |                                                        | ■                       |    |    |   |   |   |   |
| SGO_0431 | 0.352                  | 4.954                | 0.0932  | 0.5974  |         | 6.500   |            | 6.7646   | GTP-sensing transcriptional pleiotropic repressor codY |                         |    |    |   |   |   |   |
|          |                        |                      |         |         | 5.000   | 12.500  | 11.7338    | 12.5000  |                                                        |                         |    |    |   |   |   |   |

Show detected proteins only  
 Show all proteins  
 Filter by category:

Proteins found: 769

**Test**      **Cutoff**  
     

|   | Signif | Direction | Applies To   |
|---|--------|-----------|--------------|
| ■ | yes    | +         | ratios, bars |
| ■ | no     | n/a       | bars         |
| ■ | yes    | -         | ratios, bars |
| ■ | yes    | +         | p-, q-Values |
| ■ | yes    | -         | p-, q-Values |

Dot Plots    Dot Plots

Summary Table

SgFn vs Sg

SgPg vs Sg

SgPgFn vs Sg

SgPg vs SgFn

SgPgFn vs SgFn

SgPgFn vs SgPg

Coverage

SgFn vs Sg

Raw

Normalized

Log<sub>2</sub> Ratios

| Protein  | SgFn vs Sg             |                      |         |         | Raw    |         | Normalized |          | Description                                                    | Log <sub>2</sub> Ratios |    |    |   |   |   |   |
|----------|------------------------|----------------------|---------|---------|--------|---------|------------|----------|----------------------------------------------------------------|-------------------------|----|----|---|---|---|---|
|          | Log <sub>2</sub> Ratio | Log <sub>2</sub> Sum | q-Value | p-Value | SgFn   | Sg      | SgFn       | Sg       |                                                                | -6                      | -4 | -2 | 0 | 2 | 4 | 6 |
| SGO_0432 | -1.338                 | 6.161                | 0.0267  | 0.1349  |        | 32.500  |            | 33.8231  | entB; isochorismatase family protein                           |                         |    |    |   |   |   |   |
|          |                        |                      |         |         | 5.000  | 26.000  | 11.7338    | 26.0000  |                                                                |                         |    |    |   |   |   |   |
| SGO_0434 | -0.624                 | 7.577                | 0.0152  | 0.0669  | 13.000 | 49.000  | 28.3325    | 50.9948  | aspS-2; aspartyl-tRNA synthetase                               |                         |    |    |   |   |   |   |
|          |                        |                      |         |         | 20.500 | 63.500  | 48.1085    | 63.5000  |                                                                |                         |    |    |   |   |   |   |
| SGO_0435 | -0.058                 | 6.298                | 0.0814  | 0.5104  | 8.500  | 17.500  | 18.5251    | 18.2124  | gatC; glutamyl-tRNA(Gln) amidotransferase, C subunit           |                         |    |    |   |   |   |   |
|          |                        |                      |         |         | 8.500  | 22.000  | 19.9474    | 22.0000  |                                                                |                         |    |    |   |   |   |   |
| SGO_0436 | -0.868                 | 9.074                | 0.0011  | 0.0021  | 46.000 | 179.500 | 100.2534   | 186.8074 | gatA; glutamyl-tRNA(Gln) amidotransferase, A subunit           |                         |    |    |   |   |   |   |
|          |                        |                      |         |         | 38.500 | 161.500 | 90.3501    | 161.5000 |                                                                |                         |    |    |   |   |   |   |
| SGO_0437 | -0.052                 | 8.674                | 0.1104  | 0.7212  | 52.000 | 100.000 | 113.3299   | 104.0710 | gatB; glutamyl-tRNA(Gln) amidotransferase, B subunit           |                         |    |    |   |   |   |   |
|          |                        |                      |         |         | 37.500 | 103.000 | 88.0034    | 103.0000 |                                                                |                         |    |    |   |   |   |   |
| SGO_0440 | 4.334                  | 7.132                | 0.0002  | 0.0002  | 28.500 | 3.000   | 62.1135    | 3.1221   | L-idoitol 2-dehydrogenase BH3949                               |                         |    |    |   |   |   |   |
|          |                        |                      |         |         | 30.500 | 3.500   | 71.5761    | 3.5000   |                                                                |                         |    |    |   |   |   |   |
| SGO_0445 | 0.991                  | 7.156                | 0.0005  | 0.0006  | 22.500 | 21.000  | 49.0370    | 21.8549  | GTP-binding protein                                            |                         |    |    |   |   |   |   |
|          |                        |                      |         |         | 19.500 | 26.000  | 45.7618    | 26.0000  |                                                                |                         |    |    |   |   |   |   |
| SGO_0447 | 0.891                  | 5.986                | 0.0080  | 0.0300  | 11.500 | 10.000  | 25.0634    | 10.4071  | nadD; nicotinate (nicotinamide) nucleotide adenylyltransferase |                         |    |    |   |   |   |   |
|          |                        |                      |         |         | 7.000  | 11.500  | 16.4273    | 11.5000  |                                                                |                         |    |    |   |   |   |   |
| SGO_0448 | 1.496                  | 5.978                | 0.0028  | 0.0078  | 12.000 | 10.500  | 26.1531    | 10.9275  | conserved hypothetical protein TIGR00488                       |                         |    |    |   |   |   |   |
|          |                        |                      |         |         | 8.500  | 6.000   | 19.9474    | 6.0000   |                                                                |                         |    |    |   |   |   |   |
| SGO_0450 | 1.587                  | 4.981                | 0.0111  | 0.0443  | 6.500  |         | 14.1662    |          | iojap-related protein                                          |                         |    |    |   |   |   |   |
|          |                        |                      |         |         | 5.500  | 4.500   | 12.9072    | 4.5000   |                                                                |                         |    |    |   |   |   |   |
| SGO_0454 | 0.166                  | 7.715                | 0.0699  | 0.4277  | 21.000 | 54.000  | 45.7679    | 56.1983  | conserved hypothetical protein TIGR01033                       |                         |    |    |   |   |   |   |
|          |                        |                      |         |         | 28.000 | 42.500  | 65.7092    | 42.5000  |                                                                |                         |    |    |   |   |   |   |
| SGO_0455 | -5.504                 | 8.234                | 0.0133  | 0.0563  | 1.500  | 155.500 | 3.2691     | 161.8303 | lipoprotein, putative                                          |                         |    |    |   |   |   |   |
|          |                        |                      |         |         |        | 136.000 |            | 136.0000 |                                                                |                         |    |    |   |   |   |   |

- Show detected proteins only  
 Show all proteins

Proteins found:  
769

Filter by category:

ABC Transporter

Test

Cutoff

q-Value

.005

p-Value

|             | Signif | Direction | Applies To   |
|-------------|--------|-----------|--------------|
| Red         | yes    | +         | ratios, bars |
| Yellow      | no     | n/a       | bars         |
| Green       | yes    | -         | ratios, bars |
| Pink        | yes    | +         | p-, q-Values |
| Light Green | yes    | -         | p-, q-Values |

Dot Plots Dot Plots

Summary Table

SgFn vs Sg

SgPg vs Sg

SgPgFn vs Sg

SgPg vs SgFn

SgPgFn vs SgFn

SgPgFn vs SgPg

Coverage

| Protein  | SgFn vs Sg             |                      |         |         | Raw     |         | Normalized |          | Description                                       | Log <sub>2</sub> Ratios |    |    |   |   |
|----------|------------------------|----------------------|---------|---------|---------|---------|------------|----------|---------------------------------------------------|-------------------------|----|----|---|---|
|          | Log <sub>2</sub> Ratio | Log <sub>2</sub> Sum | q-Value | p-Value | SgFn    | Sg      | SgFn       | Sg       |                                                   | -6                      | -4 | -2 | 0 | 2 |
| SGO_0456 | 1.256                  | 5.488                | 0.0003  | 0.0003  | 7.500   | 7.000   | 16.3457    | 7.2850   | ILL5; amino acid aminohydrolase                   |                         |    |    |   |   |
|          |                        |                      |         |         | 6.500   | 6.000   | 15.2539    | 6.0000   |                                                   |                         |    |    |   |   |
| SGO_0457 | -3.171                 | 9.200                | 0.0001  | 0.0000  | 13.500  | 245.000 | 29.4222    | 254.9739 | ABC transporter, substrate-binding protein SP0148 |                         |    |    |   |   |
|          |                        |                      |         |         | 12.500  | 274.500 | 29.3345    | 274.5000 |                                                   |                         |    |    |   |   |
| SGO_0458 | -2.885                 | 10.776               | 0.0004  | 0.0004  | 56.500  | 801.500 | 123.1373   | 834.1288 | hlpA; lipoprotein                                 |                         |    |    |   |   |
|          |                        |                      |         |         | 37.500  | 708.500 | 88.0034    | 708.5000 |                                                   |                         |    |    |   |   |
| SGO_0459 | 0.112                  | 5.970                | 0.1341  | 0.8978  | 6.500   | 10.000  | 14.1662    | 10.4071  | succinyl-diaminopimelate desuccinylase            |                         |    |    |   |   |
|          |                        |                      |         |         | 7.500   | 20.500  | 17.6007    | 20.5000  |                                                   |                         |    |    |   |   |
| SGO_0460 | -2.640                 | 7.625                | 0.0007  | 0.0010  | 6.000   | 91.000  | 13.0765    | 94.7046  | ABC transporter, ATP-binding protein SP0151       |                         |    |    |   |   |
|          |                        |                      |         |         | 6.000   | 75.500  | 14.0805    | 75.5000  |                                                   |                         |    |    |   |   |
| SGO_0468 | 1.460                  | 7.214                | 0.0095  | 0.0367  | 31.000  | 12.000  | 67.5621    | 12.4885  | hypothetical protein SGO_0468                     |                         |    |    |   |   |
|          |                        |                      |         |         | 17.000  | 28.500  | 39.8949    | 28.5000  |                                                   |                         |    |    |   |   |
| SGO_0476 | -1.320                 | 4.817                | 0.0152  | 0.0670  |         | 12.000  |            | 12.4885  | rhodanese family protein                          |                         |    |    |   |   |
|          |                        |                      |         |         | 2.000   | 11.000  | 4.6935     | 11.0000  |                                                   |                         |    |    |   |   |
| SGO_0480 | 6.692                  | 9.969                | 0.0405  | 0.2217  | 146.500 |         | 319.2853   |          | hypothetical protein SGO_0480                     |                         |    |    |   |   |
|          |                        |                      |         |         | 289.000 | 4.500   | 678.2127   | 4.5000   |                                                   |                         |    |    |   |   |
| SGO_0483 | 0.666                  | 6.247                | 0.0052  | 0.0168  | 11.000  | 17.000  | 23.9736    | 17.6921  | hypothetical protein SGO_0483                     |                         |    |    |   |   |
|          |                        |                      |         |         | 9.500   | 12.000  | 22.2942    | 12.0000  |                                                   |                         |    |    |   |   |
| SGO_0484 | -0.367                 | 4.981                | 0.0680  | 0.4142  | 4.000   | 9.000   | 8.7177     | 9.3664   | sensor histidine kinase                           |                         |    |    |   |   |
|          |                        |                      |         |         |         | 13.500  |            | 13.5000  |                                                   |                         |    |    |   |   |
| SGO_0488 | -2.214                 | 6.635                | 0.0018  | 0.0041  | 2.000   | 39.500  | 4.3588     | 41.1080  | ABC transporter, ATP-binding protein SP0483       |                         |    |    |   |   |
|          |                        |                      |         |         | 7.000   | 37.500  | 16.4273    | 37.5000  |                                                   |                         |    |    |   |   |
| SGO_0494 | 3.418                  | 8.065                | 0.0010  | 0.0018  | 64.500  | 9.500   | 140.5727   | 9.8867   | lemA; LemA-like protein                           |                         |    |    |   |   |
|          |                        |                      |         |         | 44.500  | 13.000  | 104.4307   | 13.0000  |                                                   |                         |    |    |   |   |

- Show detected proteins only
- Show all proteins

Proteins found: 769

Filter by category:

ABC Transporter

Test

Cutoff

q-Value

.005

p-Value

|             | Signif | Direction | Applies To   |
|-------------|--------|-----------|--------------|
| Red         | yes    | +         | ratios, bars |
| Yellow      | no     | n/a       | bars         |
| Green       | yes    | -         | ratios, bars |
| Pink        | yes    | +         | p-, q-Values |
| Light Green | yes    | -         | p-, q-Values |

Dot Plots Dot Plots

Summary Table

SgFn vs Sg

SgPg vs Sg

SgPgFn vs Sg

SgPg vs SgFn

SgPgFn vs SgFn

SgPgFn vs SgPg

Coverage

SgFn vs Sg

Raw

Normalized

Log<sub>2</sub> Ratios

| Protein  | SgFn vs Sg             |                      |         |         | Raw     |         | Normalized |          | Description                                            | Log <sub>2</sub> Ratios |    |    |   |   |   |   |
|----------|------------------------|----------------------|---------|---------|---------|---------|------------|----------|--------------------------------------------------------|-------------------------|----|----|---|---|---|---|
|          | Log <sub>2</sub> Ratio | Log <sub>2</sub> Sum | q-Value | p-Value | SgFn    | Sg      | SgFn       | Sg       |                                                        | -6                      | -4 | -2 | 0 | 2 | 4 | 6 |
| SGO_0495 | 0.441                  | 5.691                | 0.0257  | 0.1271  | 7.000   | 8.000   | 15.2560    | 8.3257   | htpx; heat shock protein                               |                         |    |    |   |   |   |   |
|          |                        |                      |         |         | 6.000   | 14.000  | 14.0805    | 14.0000  |                                                        |                         |    |    |   |   |   |   |
| SGO_0501 | -1.705                 | 5.727                | 0.0055  | 0.0183  |         | 22.500  |            | 23.4160  | Uncharacterized ACR, COG1399                           |                         |    |    |   |   |   |   |
|          |                        |                      |         |         | 3.000   | 22.500  | 7.0403     | 22.5000  |                                                        |                         |    |    |   |   |   |   |
| SGO_0502 | -1.901                 | 9.535                | 0.0003  | 0.0003  | 44.000  | 291.000 | 95.8946    | 302.8465 | floL; flotillin-like protein                           |                         |    |    |   |   |   |   |
|          |                        |                      |         |         | 27.000  | 280.000 | 63.3624    | 280.0000 |                                                        |                         |    |    |   |   |   |   |
| SGO_0503 | 1.705                  | 11.551               | 0.0001  | 0.0001  | 545.500 | 350.000 | 1188.8747  | 364.2484 | gnd; 6-phosphogluconate dehydrogenase, decarboxylating |                         |    |    |   |   |   |   |
|          |                        |                      |         |         | 472.000 | 340.000 | 1107.6692  | 340.0000 |                                                        |                         |    |    |   |   |   |   |
| SGO_0505 | -3.594                 | 10.971               | 0.0001  | 0.0000  | 42.500  | 911.000 | 92.6254    | 948.0865 | PTS system, IIBC component                             |                         |    |    |   |   |   |   |
|          |                        |                      |         |         | 27.000  | 902.500 | 63.3624    | 902.5000 |                                                        |                         |    |    |   |   |   |   |
| SGO_0508 | -0.432                 | 6.099                | 0.0118  | 0.0489  | 8.500   | 24.500  | 18.5251    | 25.4974  | nrdR; transcriptional regulator, NrdR family           |                         |    |    |   |   |   |   |
|          |                        |                      |         |         |         | 24.500  |            | 24.5000  |                                                        |                         |    |    |   |   |   |   |
| SGO_0510 | 1.340                  | 5.852                | 0.0052  | 0.0170  | 11.500  | 6.500   | 25.0634    | 6.7646   | dnaI; primosomal protein DnaI                          |                         |    |    |   |   |   |   |
|          |                        |                      |         |         | 7.000   | 9.500   | 16.4273    | 9.5000   |                                                        |                         |    |    |   |   |   |   |
| SGO_0511 | 1.306                  | 5.805                | 0.0113  | 0.0460  | 7.000   | 4.500   | 15.2560    | 4.6832   | NADPH-flavin oxidoreductase -like protein              |                         |    |    |   |   |   |   |
|          |                        |                      |         |         | 10.000  | 12.500  | 23.4676    | 12.5000  |                                                        |                         |    |    |   |   |   |   |
| SGO_0512 | 0.201                  | 7.827                | 0.0613  | 0.3659  | 30.000  | 61.000  | 65.3827    | 63.4833  | GTP-binding protein engA                               |                         |    |    |   |   |   |   |
|          |                        |                      |         |         | 23.500  | 43.000  | 55.1488    | 43.0000  |                                                        |                         |    |    |   |   |   |   |
| SGO_0513 | 0.668                  | 4.254                | 0.0524  | 0.3005  | 4.000   |         | 8.7177     |          | Snf2 family protein                                    |                         |    |    |   |   |   |   |
|          |                        |                      |         |         | 2.500   | 4.500   | 5.8669     | 4.5000   |                                                        |                         |    |    |   |   |   |   |
| SGO_0515 | 0.612                  | 8.759                | 0.0031  | 0.0092  | 66.000  | 85.500  | 143.8419   | 88.9807  | murC; UDP-N-acetylmuramate--alanine ligase             |                         |    |    |   |   |   |   |
|          |                        |                      |         |         | 50.500  | 82.000  | 118.5112   | 82.0000  |                                                        |                         |    |    |   |   |   |   |
| SGO_0518 | -2.664                 | 8.637                | 0.0001  | 0.0000  | 12.500  | 170.000 | 27.2428    | 176.9206 | aminodeoxychorismate lyase-like protein                |                         |    |    |   |   |   |   |
|          |                        |                      |         |         | 11.500  | 167.000 | 26.9877    | 167.0000 |                                                        |                         |    |    |   |   |   |   |

- Show detected proteins only  
 Show all proteins

Proteins found:  
769

Filter by category:

ABC Transporter

Test

Cutoff

q-Value

.005

p-Value

|             | Signif | Direction | Applies To   |
|-------------|--------|-----------|--------------|
| Red         | yes    | +         | ratios, bars |
| Yellow      | no     | n/a       | bars         |
| Green       | yes    | -         | ratios, bars |
| Pink        | yes    | +         | p-, q-Values |
| Light Green | yes    | -         | p-, q-Values |

Dot Plots Dot Plots

Summary Table

SgFn vs Sg

SgPg vs Sg

SgPgFn vs Sg

SgPg vs SgFn

SgPgFn vs SgFn

SgPgFn vs SgPg

Coverage

| Protein  | SgFn vs Sg             |                      |         |         | Raw    |        | Normalized |         | Description                                                   | Log <sub>2</sub> Ratios |    |    |   |   |   |   |
|----------|------------------------|----------------------|---------|---------|--------|--------|------------|---------|---------------------------------------------------------------|-------------------------|----|----|---|---|---|---|
|          | Log <sub>2</sub> Ratio | Log <sub>2</sub> Sum | q-Value | p-Value | SgFn   | Sg     | SgFn       | Sg      |                                                               | -6                      | -4 | -2 | 0 | 2 | 4 | 6 |
| SGO_0519 | 0.050                  | 7.158                | 0.1070  | 0.6966  | 19.500 | 31.000 | 42.4987    | 32.2620 | greA; transcription elongation factor greA                    |                         |    |    |   |   |   |   |
|          |                        |                      |         |         | 13.000 | 37.500 | 30.5078    | 37.5000 |                                                               |                         |    |    |   |   |   |   |
| SGO_0521 | -0.573                 | 5.942                | 0.0557  | 0.3239  | 7.000  | 18.000 | 15.2560    | 18.7328 | Membrane protein oxaA 2 precursor                             |                         |    |    |   |   |   |   |
|          |                        |                      |         |         |        | 27.500 |            | 27.5000 |                                                               |                         |    |    |   |   |   |   |
| SGO_0523 | 2.159                  | 6.704                | 0.0005  | 0.0007  | 21.500 |        | 46.8576    |         | spoU rRNA Methylase family protein                            |                         |    |    |   |   |   |   |
|          |                        |                      |         |         | 20.000 | 10.500 | 46.9351    | 10.5000 |                                                               |                         |    |    |   |   |   |   |
| SGO_0526 | 0.727                  | 6.089                | 0.0277  | 0.1410  | 7.000  | 8.500  | 15.2560    | 8.8460  | ilvB; acetolactate synthase, large subunit, biosynthetic type |                         |    |    |   |   |   |   |
|          |                        |                      |         |         | 11.500 | 17.000 | 26.9877    | 17.0000 |                                                               |                         |    |    |   |   |   |   |
| SGO_0527 | 0.008                  | 5.759                | 0.1306  | 0.8672  | 6.000  | 12.500 | 13.0765    | 13.0089 | ilvN; acetolactate synthase, small subunit                    |                         |    |    |   |   |   |   |
|          |                        |                      |         |         | 6.000  | 14.000 | 14.0805    | 14.0000 |                                                               |                         |    |    |   |   |   |   |
| SGO_0528 | 1.026                  | 8.815                | 0.0020  | 0.0049  | 77.500 | 68.000 | 168.9052   | 70.7683 | ilvC; ketol-acid reductoisomerase                             |                         |    |    |   |   |   |   |
|          |                        |                      |         |         | 57.000 | 77.000 | 133.7651   | 77.0000 |                                                               |                         |    |    |   |   |   |   |
| SGO_0529 | 1.907                  | 5.080                | 0.0065  | 0.0226  | 4.500  | 2.000  | 9.8074     | 2.0814  | ilvA; threonine dehydratase                                   |                         |    |    |   |   |   |   |
|          |                        |                      |         |         | 7.000  | 5.500  | 16.4273    | 5.5000  |                                                               |                         |    |    |   |   |   |   |
| SGO_0530 | -0.427                 | 5.304                | 0.0251  | 0.1236  | 3.000  | 10.000 | 6.5383     | 10.4071 | Cof family protein                                            |                         |    |    |   |   |   |   |
|          |                        |                      |         |         | 4.500  | 12.000 | 10.5604    | 12.0000 |                                                               |                         |    |    |   |   |   |   |
| SGO_0533 | 2.481                  | 3.362                |         |         | 4.000  | 1.500  | 8.7177     | 1.5611  | conserved hypothetical protein TIGR00150                      |                         |    |    |   |   |   |   |
|          |                        |                      |         |         |        |        |            |         |                                                               |                         |    |    |   |   |   |   |
| SGO_0535 | -2.494                 | 6.747                | 0.0178  | 0.0800  | 4.000  | 42.500 | 8.7177     | 44.2302 | putative transcriptional regulator LytR                       |                         |    |    |   |   |   |   |
|          |                        |                      |         |         |        | 54.500 |            | 54.5000 |                                                               |                         |    |    |   |   |   |   |
| SGO_0537 | 1.242                  | 6.570                | 0.0008  | 0.0013  | 16.000 | 11.500 | 34.8708    | 11.9682 | HIT family protein                                            |                         |    |    |   |   |   |   |
|          |                        |                      |         |         | 13.500 | 16.500 | 31.6812    | 16.5000 |                                                               |                         |    |    |   |   |   |   |
| SGO_0538 | -0.908                 | 6.861                | 0.0075  | 0.0275  | 7.000  | 41.000 | 15.2560    | 42.6691 | ABC transporter, ATP-binding protein SP0522                   |                         |    |    |   |   |   |   |
|          |                        |                      |         |         | 11.000 | 32.500 | 25.8143    | 32.5000 |                                                               |                         |    |    |   |   |   |   |

- Show detected proteins only
- Show all proteins

Proteins found: 769

Filter by category:

ABC Transporter

Test

Cutoff

q-Value

.005

p-Value

|             | Signif | Direction | Applies To   |
|-------------|--------|-----------|--------------|
| Red         | yes    | +         | ratios, bars |
| Yellow      | no     | n/a       | bars         |
| Green       | yes    | -         | ratios, bars |
| Pink        | yes    | +         | p-, q-Values |
| Light Green | yes    | -         | p-, q-Values |

Dot Plots Dot Plots



Summary Table

SgFn vs Sg

SgPg vs Sg

SgPgFn vs Sg

SgPg vs SgFn

SgPgFn vs SgFn

SgPgFn vs SgPg

Coverage

SgFn vs Sg

Raw

Normalized

Log<sub>2</sub> Ratios

| Protein  | SgFn vs Sg             |                      |         |         | Raw     |         | Normalized |          | Description                                             | Log <sub>2</sub> Ratios |    |    |   |   |   |
|----------|------------------------|----------------------|---------|---------|---------|---------|------------|----------|---------------------------------------------------------|-------------------------|----|----|---|---|---|
|          | Log <sub>2</sub> Ratio | Log <sub>2</sub> Sum | q-Value | p-Value | SgFn    | Sg      | SgFn       | Sg       |                                                         | -6                      | -4 | -2 | 0 | 2 | 4 |
| SGO_0540 | 1.134                  | 7.814                | 0.0003  | 0.0003  | 37.000  | 35.500  | 80.6386    | 36.9452  | hypothetical protein SGO_0540                           |                         |    |    |   |   |   |
|          |                        |                      |         |         | 31.500  | 33.500  | 73.9228    | 33.5000  |                                                         |                         |    |    |   |   |   |
| SGO_0541 | -0.545                 | 5.797                | 0.0064  | 0.0223  | 5.500   | 14.000  | 11.9868    | 14.5699  | methyltransferase, putative                             |                         |    |    |   |   |   |
|          |                        |                      |         |         | 4.500   | 18.500  | 10.5604    | 18.5000  |                                                         |                         |    |    |   |   |   |
| SGO_0543 | -1.692                 | 7.929                | 0.0001  | 0.0000  | 13.500  | 87.500  | 29.4222    | 91.0621  | nusA; transcription termination factor NusA             |                         |    |    |   |   |   |
|          |                        |                      |         |         | 12.000  | 95.000  | 28.1611    | 95.0000  |                                                         |                         |    |    |   |   |   |
| SGO_0546 | -0.307                 | 8.766                | 0.0250  | 0.1222  | 40.500  | 132.500 | 88.2666    | 137.8940 | infB; Translation initiation factor IF-2                |                         |    |    |   |   |   |
|          |                        |                      |         |         | 45.000  | 103.500 | 105.6041   | 103.5000 |                                                         |                         |    |    |   |   |   |
| SGO_0548 | -4.413                 | 7.683                | 0.0137  | 0.0590  |         | 105.000 |            | 109.2745 | Na/Pi-cotransporter family protein                      |                         |    |    |   |   |   |
|          |                        |                      |         |         | 2.000   | 91.500  | 4.6935     | 91.5000  |                                                         |                         |    |    |   |   |   |
| SGO_0549 | -0.156                 | 2.789                |         |         | 1.500   | 3.500   | 3.2691     | 3.6425   | nagA; N-acetylglucosamine-6-phosphate deacetylase       |                         |    |    |   |   |   |
|          |                        |                      |         |         |         |         |            |          |                                                         |                         |    |    |   |   |   |
| SGO_0552 | 3.347                  | 7.019                | 0.0005  | 0.0007  | 29.500  | 3.500   | 64.2929    | 3.6425   | oxidoreductase, aldo/keto reductase family              |                         |    |    |   |   |   |
|          |                        |                      |         |         | 22.500  | 9.000   | 52.8020    | 9.0000   |                                                         |                         |    |    |   |   |   |
| SGO_0554 | 0.061                  | 6.972                | 0.1305  | 0.8645  | 12.500  | 18.000  | 27.2428    | 18.7328  | hsdR; type I site-specific deoxyribonuclease            |                         |    |    |   |   |   |
|          |                        |                      |         |         | 14.500  | 45.500  | 34.0280    | 45.5000  |                                                         |                         |    |    |   |   |   |
| SGO_0558 | 0.494                  | 3.590                |         |         |         |         |            |          | hypothetical protein SGO_0558                           |                         |    |    |   |   |   |
|          |                        |                      |         |         | 3.000   | 5.000   | 7.0403     | 5.0000   |                                                         |                         |    |    |   |   |   |
| SGO_0560 | -1.604                 | 4.640                | 0.0073  | 0.0263  |         | 10.000  |            | 10.4071  | hsdM; type I restriction-modification system, M subunit |                         |    |    |   |   |   |
|          |                        |                      |         |         | 1.500   | 11.000  | 3.5201     | 11.0000  |                                                         |                         |    |    |   |   |   |
| SGO_0565 | 2.010                  | 9.293                | 0.0008  | 0.0013  | 128.000 | 56.500  | 278.9660   | 58.8001  | adhA; alcohol dehydrogenase                             |                         |    |    |   |   |   |
|          |                        |                      |         |         | 95.500  | 65.500  | 224.1153   | 65.5000  |                                                         |                         |    |    |   |   |   |
| SGO_0566 | 0.575                  | 8.380                | 0.0109  | 0.0434  | 40.500  | 53.000  | 88.2666    | 55.1576  | sgc; serine protease challisin                          |                         |    |    |   |   |   |
|          |                        |                      |         |         | 47.000  | 79.500  | 110.2976   | 79.5000  |                                                         |                         |    |    |   |   |   |

- Show detected proteins only  
 Show all proteins

Proteins found:  
769

Filter by category:

ABC Transporter

Test

Cutoff

q-Value

.005

p-Value

|             | Signif | Direction | Applies To   |
|-------------|--------|-----------|--------------|
| Red         | yes    | +         | ratios, bars |
| Yellow      | no     | n/a       | bars         |
| Green       | yes    | -         | ratios, bars |
| Pink        | yes    | +         | p-, q-Values |
| Light Green | yes    | -         | p-, q-Values |

Dot Plots Dot Plots

Summary Table

SgFn vs Sg

SgPg vs Sg

SgPgFn vs Sg

SgPg vs SgFn

SgPgFn vs SgFn

SgPgFn vs SgPg

Coverage

| Protein  | SgFn vs Sg             |                      |         |         | Raw    |         | Normalized |          | Description                                    | Log <sub>2</sub> Ratios |    |    |   |   |   |   |
|----------|------------------------|----------------------|---------|---------|--------|---------|------------|----------|------------------------------------------------|-------------------------|----|----|---|---|---|---|
|          | Log <sub>2</sub> Ratio | Log <sub>2</sub> Sum | q-Value | p-Value | SgFn   | Sg      | SgFn       | Sg       |                                                | -6                      | -4 | -2 | 0 | 2 | 4 | 6 |
| SGO_0568 | -1.401                 | 6.686                | 0.0013  | 0.0025  | 8.500  | 34.500  | 18.5251    | 35.9045  | glyQ; glycyl-tRNA synthetase, alpha subunit    |                         |    |    |   |   |   |   |
|          |                        |                      |         |         | 4.500  | 38.000  | 10.5604    | 38.0000  |                                                |                         |    |    |   |   |   |   |
| SGO_0569 | 0.390                  | 8.405                | 0.0137  | 0.0586  | 38.000 | 70.000  | 82.8180    | 72.8497  | glyS; glycyl-tRNA synthetase, beta subunit     |                         |    |    |   |   |   |   |
|          |                        |                      |         |         | 47.000 | 73.000  | 110.2976   | 73.0000  |                                                |                         |    |    |   |   |   |   |
| SGO_0573 | 0.013                  | 6.729                | 0.1339  | 0.8953  | 15.500 | 20.500  | 33.7810    | 21.3345  | mraW; S-adenosyl-methyltransferase MraW        |                         |    |    |   |   |   |   |
|          |                        |                      |         |         | 8.500  | 31.000  | 19.9474    | 31.0000  |                                                |                         |    |    |   |   |   |   |
| SGO_0577 | -0.084                 | 6.915                | 0.1306  | 0.8687  | 17.500 | 23.500  | 38.1399    | 24.4567  | ATP-dependent RNA helicase                     |                         |    |    |   |   |   |   |
|          |                        |                      |         |         | 9.000  | 37.000  | 21.1208    | 37.0000  |                                                |                         |    |    |   |   |   |   |
| SGO_0579 | -3.048                 | 6.975                | 0.0001  | 0.0000  | 3.000  | 55.500  | 6.5383     | 57.7594  | amino acid ABC transporter ATP binding protein |                         |    |    |   |   |   |   |
|          |                        |                      |         |         | 3.000  | 54.500  | 7.0403     | 54.5000  |                                                |                         |    |    |   |   |   |   |
| SGO_0581 | -0.401                 | 5.554                | 0.0381  | 0.2059  | 3.500  | 11.000  | 7.6280     | 11.4478  | trxB; thioredoxin-disulfide reductase          |                         |    |    |   |   |   |   |
|          |                        |                      |         |         | 5.500  | 15.000  | 12.9072    | 15.0000  |                                                |                         |    |    |   |   |   |   |
| SGO_0582 | 3.236                  | 8.876                | 0.0000  | 0.0000  | 96.000 | 18.000  | 209.2245   | 18.7328  | nicotinate phosphoribosyltransferase, putative |                         |    |    |   |   |   |   |
|          |                        |                      |         |         | 91.500 | 27.000  | 214.7283   | 27.0000  |                                                |                         |    |    |   |   |   |   |
| SGO_0583 | 2.312                  | 6.694                | 0.0022  | 0.0058  | 23.000 | 5.500   | 50.1267    | 5.7239   | nadE; NAD+ synthetase                          |                         |    |    |   |   |   |   |
|          |                        |                      |         |         | 15.000 | 12.500  | 35.2014    | 12.5000  |                                                |                         |    |    |   |   |   |   |
| SGO_0585 | 2.877                  | 8.679                | 0.0002  | 0.0002  | 77.500 | 19.500  | 168.9052   | 20.2938  | pepC; aminopeptidase C                         |                         |    |    |   |   |   |   |
|          |                        |                      |         |         | 81.500 | 29.500  | 191.2607   | 29.5000  |                                                |                         |    |    |   |   |   |   |
| SGO_0586 | -1.742                 | 8.755                | 0.0002  | 0.0001  | 20.500 | 154.500 | 44.6782    | 160.7896 | pbp1a; penicillin-binding protein 1A           |                         |    |    |   |   |   |   |
|          |                        |                      |         |         | 23.500 | 171.500 | 55.1488    | 171.5000 |                                                |                         |    |    |   |   |   |   |
| SGO_0589 | 1.676                  | 7.845                | 0.0038  | 0.0113  | 49.000 | 24.000  | 106.7917   | 24.9770  | methylase                                      |                         |    |    |   |   |   |   |
|          |                        |                      |         |         | 29.500 | 29.000  | 69.2293    | 29.0000  |                                                |                         |    |    |   |   |   |   |
| SGO_0590 | 0.366                  | 6.294                | 0.0250  | 0.1225  | 11.000 | 13.500  | 23.9736    | 14.0496  | Methyltransferase                              |                         |    |    |   |   |   |   |
|          |                        |                      |         |         | 8.500  | 20.500  | 19.9474    | 20.5000  |                                                |                         |    |    |   |   |   |   |

- Show detected proteins only
- Show all proteins

Proteins found: 769

Filter by category:

ABC Transporter

Test

Cutoff

q-Value

.005

p-Value

|  | Signif | Direction | Applies To   |
|--|--------|-----------|--------------|
|  | yes    | +         | ratios, bars |
|  | no     | n/a       | bars         |
|  | yes    | -         | ratios, bars |
|  | yes    | +         | p-, q-Values |
|  | yes    | -         | p-, q-Values |

Dot Plots Dot Plots

Summary Table

SgFn vs Sg

SgPg vs Sg

SgPgFn vs Sg

SgPg vs SgFn

SgPgFn vs SgFn

SgPgFn vs SgPg

Coverage

SgFn vs Sg

Raw

Normalized

Log<sub>2</sub> Ratios

| Protein  | SgFn vs Sg             |                      |         |         | Raw    |         | Normalized |          | Description                                                                                   | Log <sub>2</sub> Ratios |    |    |   |   |   |
|----------|------------------------|----------------------|---------|---------|--------|---------|------------|----------|-----------------------------------------------------------------------------------------------|-------------------------|----|----|---|---|---|
|          | Log <sub>2</sub> Ratio | Log <sub>2</sub> Sum | q-Value | p-Value | SgFn   | Sg      | SgFn       | Sg       |                                                                                               | -6                      | -4 | -2 | 0 | 2 | 4 |
| SGO_0591 | -2.414                 | 8.988                | 0.0000  | 0.0000  | 18.500 | 208.000 | 40.3193    | 216.4676 | hypothetical protein SGO_0591                                                                 |                         |    |    |   |   |   |
|          |                        |                      |         |         | 17.000 | 211.000 | 39.8949    | 211.0000 |                                                                                               |                         |    |    |   |   |   |
| SGO_0592 | 0.770                  | 5.593                | 0.0015  | 0.0034  | 7.500  | 8.000   | 16.3457    | 8.3257   | luxS; autoinducer-2 production protein LuxS                                                   |                         |    |    |   |   |   |
|          |                        |                      |         |         | 6.000  | 9.500   | 14.0805    | 9.5000   |                                                                                               |                         |    |    |   |   |   |
| SGO_0593 | -3.236                 | 8.876                | 0.0001  | 0.0000  | 9.000  | 196.000 | 19.6148    | 203.9791 | HD/KH domain protein                                                                          |                         |    |    |   |   |   |
|          |                        |                      |         |         | 11.000 | 220.500 | 25.8143    | 220.5000 |                                                                                               |                         |    |    |   |   |   |
| SGO_0594 | 0.562                  | 6.622                | 0.0052  | 0.0169  | 14.500 | 21.500  | 31.6016    | 22.3753  | gmk; Guanylate kinase (GMP kinase)                                                            |                         |    |    |   |   |   |
|          |                        |                      |         |         | 11.500 | 17.500  | 26.9877    | 17.5000  |                                                                                               |                         |    |    |   |   |   |
| SGO_0595 | -1.365                 | 6.899                | 0.0004  | 0.0006  | 9.000  | 40.500  | 19.6148    | 42.1487  | DNA-directed RNA polymerase, omega subunit                                                    |                         |    |    |   |   |   |
|          |                        |                      |         |         | 6.000  | 43.500  | 14.0805    | 43.5000  |                                                                                               |                         |    |    |   |   |   |
| SGO_0596 | 1.535                  | 4.408                | 0.0093  | 0.0359  | 4.000  | 3.000   | 8.7177     | 3.1221   | priA; primosomal protein N"                                                                   |                         |    |    |   |   |   |
|          |                        |                      |         |         | 4.000  |         | 9.3870     |          |                                                                                               |                         |    |    |   |   |   |
| SGO_0597 | 2.095                  | 6.308                | 0.0012  | 0.0024  | 13.000 | 5.000   | 28.3325    | 5.2035   | fmt; methionyl-tRNA formyltransferase                                                         |                         |    |    |   |   |   |
|          |                        |                      |         |         | 15.000 | 10.500  | 35.2014    | 10.5000  |                                                                                               |                         |    |    |   |   |   |
| SGO_0598 | 0.617                  | 4.435                | 0.0067  | 0.0238  |        | 6.000   |            | 6.2443   | sun; sun protein                                                                              |                         |    |    |   |   |   |
|          |                        |                      |         |         | 4.000  | 6.000   | 9.3870     | 6.0000   |                                                                                               |                         |    |    |   |   |   |
| SGO_0599 | 1.085                  | 7.939                | 0.0005  | 0.0006  | 40.500 | 39.000  | 88.2666    | 40.5877  | phosphoprotein phosphatase                                                                    |                         |    |    |   |   |   |
|          |                        |                      |         |         | 33.500 | 38.000  | 78.6164    | 38.0000  |                                                                                               |                         |    |    |   |   |   |
| SGO_0600 | -2.104                 | 8.114                | 0.0001  | 0.0001  | 14.000 | 105.000 | 30.5119    | 109.2745 | serine/threonine protein kinase                                                               |                         |    |    |   |   |   |
|          |                        |                      |         |         | 9.500  | 115.000 | 22.2942    | 115.0000 |                                                                                               |                         |    |    |   |   |   |
| SGO_0603 | 0.459                  | 5.665                | 0.0023  | 0.0062  | 7.000  | 9.500   | 15.2560    | 9.8867   | response regulator                                                                            |                         |    |    |   |   |   |
|          |                        |                      |         |         | 6.000  | 11.500  | 14.0805    | 11.5000  |                                                                                               |                         |    |    |   |   |   |
| SGO_0604 | 1.785                  | 8.952                | 0.0001  | 0.0001  | 87.000 | 47.500  | 189.6097   | 49.4337  | hydrolase, haloacid dehalogenase family/peptidyl-prolyl cis-trans isomerase, cyclophilin type |                         |    |    |   |   |   |
|          |                        |                      |         |         | 82.500 | 62.500  | 193.6074   | 62.5000  |                                                                                               |                         |    |    |   |   |   |

- Show detected proteins only  
 Show all proteins

Proteins found:  
769

Filter by category:

ABC Transporter

Test

Cutoff

q-Value

.005

p-Value

|             | Signif | Direction | Applies To   |
|-------------|--------|-----------|--------------|
| Red         | yes    | +         | ratios, bars |
| Yellow      | no     | n/a       | bars         |
| Green       | yes    | -         | ratios, bars |
| Pink        | yes    | +         | p-, q-Values |
| Light Green | yes    | -         | p-, q-Values |

Dot Plots Dot Plots

Summary Table

SgFn vs Sg

SgPg vs Sg

SgPgFn vs Sg

SgPg vs SgFn

SgPgFn vs SgFn

SgPgFn vs SgPg

Coverage

| Protein  | SgFn vs Sg             |                      |         |         | Raw    |         | Normalized |          | Description                                                                     | Log <sub>2</sub> Ratios |    |    |   |   |
|----------|------------------------|----------------------|---------|---------|--------|---------|------------|----------|---------------------------------------------------------------------------------|-------------------------|----|----|---|---|
|          | Log <sub>2</sub> Ratio | Log <sub>2</sub> Sum | q-Value | p-Value | SgFn   | Sg      | SgFn       | Sg       |                                                                                 | -6                      | -4 | -2 | 0 | 2 |
| SGO_0606 | -0.606                 | 9.178                | 0.0004  | 0.0005  | 52.000 | 162.000 | 113.3299   | 168.5950 | cysK; cysteine synthase A                                                       |                         |    |    |   |   |
|          |                        |                      |         |         | 49.500 | 181.000 | 116.1645   | 181.0000 |                                                                                 |                         |    |    |   |   |
| SGO_0610 | 1.162                  | 8.870                | 0.0022  | 0.0058  | 84.000 | 75.000  | 183.0714   | 78.0532  | ribosomal subunit interface protein                                             |                         |    |    |   |   |
|          |                        |                      |         |         | 60.000 | 66.000  | 140.8054   | 66.0000  |                                                                                 |                         |    |    |   |   |
| SGO_0626 | -1.694                 | 5.610                | 0.0047  | 0.0149  | 3.000  | 20.000  | 6.5383     | 20.8142  | recX; Regulatory protein recX                                                   |                         |    |    |   |   |
|          |                        |                      |         |         |        | 21.500  |            | 21.5000  |                                                                                 |                         |    |    |   |   |
| SGO_0631 | 0.803                  | 3.099                |         |         | 2.500  | 3.000   | 5.4486     | 3.1221   | alpha-glycerophosphate oxidase                                                  |                         |    |    |   |   |
|          |                        |                      |         |         |        |         |            |          |                                                                                 |                         |    |    |   |   |
| SGO_0635 | 1.553                  | 3.976                |         |         |        |         |            |          | hypothetical protein SGO_0635                                                   |                         |    |    |   |   |
|          |                        |                      |         |         | 5.000  | 4.000   | 11.7338    | 4.0000   |                                                                                 |                         |    |    |   |   |
| SGO_0639 | 0.072                  | 8.074                | 0.0676  | 0.4110  | 29.000 | 65.500  | 63.2032    | 68.1665  | valS; valyl-tRNA synthetase                                                     |                         |    |    |   |   |
|          |                        |                      |         |         | 32.000 | 63.000  | 75.0962    | 63.0000  |                                                                                 |                         |    |    |   |   |
| SGO_0641 | 0.022                  | 6.939                | 0.1313  | 0.8744  | 16.000 | 32.500  | 34.8708    | 33.8231  | ATPase, histidine kinase-, DNA gyrase B-, and HSP90-like domain protein protein |                         |    |    |   |   |
|          |                        |                      |         |         | 11.500 | 27.000  | 26.9877    | 27.0000  |                                                                                 |                         |    |    |   |   |
| SGO_0642 | -1.789                 | 6.945                | 0.0020  | 0.0050  | 4.500  | 39.500  | 9.8074     | 41.1080  | hypothetical protein SGO_0642                                                   |                         |    |    |   |   |
|          |                        |                      |         |         | 8.000  | 53.500  | 18.7741    | 53.5000  |                                                                                 |                         |    |    |   |   |
| SGO_0643 | 0.835                  | 5.351                | 0.0028  | 0.0078  | 5.500  | 6.000   | 11.9868    | 6.2443   | cytosine-specific methyltransferase                                             |                         |    |    |   |   |
|          |                        |                      |         |         | 6.000  | 8.500   | 14.0805    | 8.5000   |                                                                                 |                         |    |    |   |   |
| SGO_0644 | -0.099                 | 5.966                | 0.0866  | 0.5505  | 8.000  | 16.000  | 17.4354    | 16.6514  | hypothetical protein SGO_0644                                                   |                         |    |    |   |   |
|          |                        |                      |         |         | 5.500  | 15.500  | 12.9072    | 15.5000  |                                                                                 |                         |    |    |   |   |
| SGO_0652 | -3.825                 | 7.262                | 0.0001  | 0.0000  | 2.500  | 71.000  | 5.4486     | 73.8904  | hypothetical protein SGO_0652                                                   |                         |    |    |   |   |
|          |                        |                      |         |         | 2.000  | 69.500  | 4.6935     | 69.5000  |                                                                                 |                         |    |    |   |   |
| SGO_0654 | -3.313                 | 7.518                | 0.0183  | 0.0826  | 4.000  | 74.000  | 8.7177     | 77.0125  | radical SAM enzyme, Cfr family                                                  |                         |    |    |   |   |
|          |                        |                      |         |         |        | 97.500  |            | 97.5000  |                                                                                 |                         |    |    |   |   |

- Show detected proteins only
- Show all proteins

Proteins found: 769

Filter by category:

ABC Transporter

Test

Cutoff

q-Value

.005

p-Value

|             | Signif | Direction | Applies To   |
|-------------|--------|-----------|--------------|
| Red         | yes    | +         | ratios, bars |
| Yellow      | no     | n/a       | bars         |
| Green       | yes    | -         | ratios, bars |
| Pink        | yes    | +         | p-, q-Values |
| Light Green | yes    | -         | p-, q-Values |

Dot Plots Dot Plots

Summary Table

SgFn vs Sg

SgPg vs Sg

SgPgFn vs Sg

SgPg vs SgFn

SgPgFn vs SgFn

SgPgFn vs SgPg

Coverage

SgFn vs Sg

Raw

Normalized

Log<sub>2</sub> Ratios

| Protein  | SgFn vs Sg             |                      |         |         | Raw     |         | Normalized |          | Description                                                            | Log <sub>2</sub> Ratios |    |    |   |   |
|----------|------------------------|----------------------|---------|---------|---------|---------|------------|----------|------------------------------------------------------------------------|-------------------------|----|----|---|---|
|          | Log <sub>2</sub> Ratio | Log <sub>2</sub> Sum | q-Value | p-Value | SgFn    | Sg      | SgFn       | Sg       |                                                                        | -6                      | -4 | -2 | 0 | 2 |
| SGO_0656 | 0.786                  | 6.720                | 0.0347  | 0.1846  | 8.000   | 17.000  | 17.4354    | 17.6921  | trpB-2; tryptophan synthase, beta subunit                              |                         |    |    |   |   |
|          |                        |                      |         |         | 22.500  | 17.500  | 52.8020    | 17.5000  |                                                                        |                         |    |    |   |   |
| SGO_0662 | 1.838                  | 4.612                | 0.0045  | 0.0139  | 5.000   |         | 10.8971    |          | trpB-1; tryptophan synthase, beta subunit                              |                         |    |    |   |   |
|          |                        |                      |         |         | 4.500   | 3.000   | 10.5604    | 3.0000   |                                                                        |                         |    |    |   |   |
| SGO_0665 | -0.806                 | 10.143               | 0.0079  | 0.0292  | 107.500 | 405.500 | 234.2879   | 422.0077 | non-heme iron-containing ferritin                                      |                         |    |    |   |   |
|          |                        |                      |         |         | 75.000  | 298.500 | 176.0068   | 298.5000 |                                                                        |                         |    |    |   |   |
| SGO_0669 | 0.790                  | 8.186                | 0.0019  | 0.0045  | 38.500  | 49.000  | 83.9077    | 50.9948  | typA; GTP-binding protein TypA                                         |                         |    |    |   |   |
|          |                        |                      |         |         | 43.000  | 55.500  | 100.9105   | 55.5000  |                                                                        |                         |    |    |   |   |
| SGO_0671 | 1.635                  | 7.976                | 0.0003  | 0.0004  | 46.500  | 30.500  | 101.3431   | 31.7416  | murD; UDP-N-acetylmuramoylalanine--D-glutamate ligase                  |                         |    |    |   |   |
|          |                        |                      |         |         | 38.000  | 29.500  | 89.1768    | 29.5000  |                                                                        |                         |    |    |   |   |
| SGO_0672 | -0.119                 | 7.180                | 0.0814  | 0.5114  | 14.000  | 42.500  | 30.5119    | 44.2302  | murG; undecaprenyl-PP-MurNAc-pentapeptide-UDPGlcNAc GlcNAc transferase |                         |    |    |   |   |
|          |                        |                      |         |         | 16.500  | 31.500  | 38.7215    | 31.5000  |                                                                        |                         |    |    |   |   |
| SGO_0673 | -1.650                 | 6.736                | 0.0020  | 0.0049  | 4.500   | 33.500  | 9.8074     | 34.8638  | DivIB; cell division protein DivIB                                     |                         |    |    |   |   |
|          |                        |                      |         |         | 7.000   | 45.500  | 16.4273    | 45.5000  |                                                                        |                         |    |    |   |   |
| SGO_0674 | 0.569                  | 9.226                | 0.0003  | 0.0004  | 84.500  | 114.000 | 184.1612   | 118.6409 | ftsA; cell division protein FtsA                                       |                         |    |    |   |   |
|          |                        |                      |         |         | 74.000  | 122.500 | 173.6600   | 122.5000 |                                                                        |                         |    |    |   |   |
| SGO_0675 | 0.657                  | 9.878                | 0.0130  | 0.0548  | 155.500 | 145.500 | 338.9001   | 151.4232 | ftsZ; cell division protein FtsZ                                       |                         |    |    |   |   |
|          |                        |                      |         |         | 101.000 | 213.500 | 237.0224   | 213.5000 |                                                                        |                         |    |    |   |   |
| SGO_0676 | -0.268                 | 5.946                | 0.0808  | 0.5048  | 4.500   | 13.500  | 9.8074     | 14.0496  | conserved hypothetical protein TIGR00044                               |                         |    |    |   |   |
|          |                        |                      |         |         | 8.000   | 19.000  | 18.7741    | 19.0000  |                                                                        |                         |    |    |   |   |
| SGO_0677 | -0.741                 | 8.345                | 0.0045  | 0.0138  | 26.500  | 111.000 | 57.7547    | 115.5188 | ylmF protein                                                           |                         |    |    |   |   |
|          |                        |                      |         |         | 27.000  | 88.500  | 63.3624    | 88.5000  |                                                                        |                         |    |    |   |   |
| SGO_0680 | 0.018                  | 8.598                | 0.1210  | 0.7945  | 55.000  | 93.500  | 119.8682   | 97.3063  | cell division protein DivIVA                                           |                         |    |    |   |   |
|          |                        |                      |         |         | 33.000  | 93.000  | 77.4430    | 93.0000  |                                                                        |                         |    |    |   |   |

- Show detected proteins only  
 Show all proteins

Proteins found:  
769

Filter by category:

ABC Transporter

Test

Cutoff

q-Value

.005

p-Value

|             | Signif | Direction | Applies To   |
|-------------|--------|-----------|--------------|
| Red         | yes    | +         | ratios, bars |
| Yellow      | no     | n/a       | bars         |
| Green       | yes    | -         | ratios, bars |
| Pink        | yes    | +         | p-, q-Values |
| Light Green | yes    | -         | p-, q-Values |

Dot Plots Dot Plots

Summary Table

SgFn vs Sg

SgPg vs Sg

SgPgFn vs Sg

SgPg vs SgFn

SgPgFn vs SgFn

SgPgFn vs SgPg

Coverage

SgFn vs Sg

Raw

Normalized

Log<sub>2</sub> Ratios

| Protein  | SgFn vs Sg             |                      |         |         | Raw     |          | Normalized |           | Description                                                     | Log <sub>2</sub> Ratios |    |    |   |   |   |   |
|----------|------------------------|----------------------|---------|---------|---------|----------|------------|-----------|-----------------------------------------------------------------|-------------------------|----|----|---|---|---|---|
|          | Log <sub>2</sub> Ratio | Log <sub>2</sub> Sum | q-Value | p-Value | SgFn    | Sg       | SgFn       | Sg        |                                                                 | -6                      | -4 | -2 | 0 | 2 | 4 | 6 |
| SGO_0681 | -0.268                 | 8.346                | 0.0217  | 0.1021  | 33.500  | 74.500   | 73.0106    | 77.5329   | ileS; isoleucyl-tRNA synthetase                                 |                         |    |    |   |   |   |   |
|          |                        |                      |         |         | 31.500  | 101.000  | 73.9228    | 101.0000  |                                                                 |                         |    |    |   |   |   |   |
| SGO_0684 | 0.170                  | 8.754                | 0.0141  | 0.0608  | 49.000  | 97.000   | 106.7917   | 100.9488  | hypothetical protein SGO_0684                                   |                         |    |    |   |   |   |   |
|          |                        |                      |         |         | 52.000  | 102.000  | 122.0314   | 102.0000  |                                                                 |                         |    |    |   |   |   |   |
| SGO_0685 | 0.646                  | 3.529                |         |         |         |          |            |           | MutT/nudix family protein                                       |                         |    |    |   |   |   |   |
|          |                        |                      |         |         | 3.000   | 4.500    | 7.0403     | 4.5000    |                                                                 |                         |    |    |   |   |   |   |
| SGO_0688 | 0.228                  | 8.363                | 0.0550  | 0.3181  | 31.000  | 73.500   | 67.5621    | 76.4922   | ATP dependent Clp protease, ATP-binding subunit, ClpE           |                         |    |    |   |   |   |   |
|          |                        |                      |         |         | 48.000  | 72.500   | 112.6443   | 72.5000   |                                                                 |                         |    |    |   |   |   |   |
| SGO_0690 | 1.809                  | 5.251                | 0.0084  | 0.0320  | 5.000   | 2.000    | 10.8971    | 2.0814    | foID; methenyltetrahydrofolate cyclohydrolase                   |                         |    |    |   |   |   |   |
|          |                        |                      |         |         | 7.500   | 7.500    | 17.6007    | 7.5000    |                                                                 |                         |    |    |   |   |   |   |
| SGO_0693 | 0.753                  | 6.673                | 0.0237  | 0.1130  | 10.000  | 20.000   | 21.7942    | 20.8142   | xseA; exodeoxyribonuclease VII, large subunit                   |                         |    |    |   |   |   |   |
|          |                        |                      |         |         | 18.500  | 16.000   | 43.4150    | 16.0000   |                                                                 |                         |    |    |   |   |   |   |
| SGO_0698 | 1.171                  | 6.257                | 0.0039  | 0.0118  | 11.000  | 8.000    | 23.9736    | 8.3257    | recN; DNA repair protein RecN                                   |                         |    |    |   |   |   |   |
|          |                        |                      |         |         | 12.000  | 16.000   | 28.1611    | 16.0000   |                                                                 |                         |    |    |   |   |   |   |
| SGO_0699 | 1.280                  | 5.382                | 0.0018  | 0.0043  | 6.000   | 5.000    | 13.0765    | 5.2035    | Serine/threonine protein phosphatase                            |                         |    |    |   |   |   |   |
|          |                        |                      |         |         | 7.000   | 7.000    | 16.4273    | 7.0000    |                                                                 |                         |    |    |   |   |   |   |
| SGO_0700 | -0.380                 | 5.870                | 0.0479  | 0.2708  | 7.500   | 18.500   | 16.3457    | 19.2531   | DegV family protein                                             |                         |    |    |   |   |   |   |
|          |                        |                      |         |         | 4.000   | 13.500   | 9.3870     | 13.5000   |                                                                 |                         |    |    |   |   |   |   |
| SGO_0701 | 0.805                  | 12.498               | 0.0064  | 0.0221  | 705.500 | 1072.000 | 1537.5822  | 1115.6407 | hup; DNA-binding histone-like protein HU                        |                         |    |    |   |   |   |   |
|          |                        |                      |         |         | 919.000 | 974.000  | 2156.6696  | 974.0000  |                                                                 |                         |    |    |   |   |   |   |
| SGO_0704 | 1.491                  | 10.896               | 0.0009  | 0.0016  | 341.500 | 193.000  | 744.2726   | 200.8570  | gpmA; 2,3-bisphosphoglycerate-dependent phosphoglycerate mutase |                         |    |    |   |   |   |   |
|          |                        |                      |         |         | 278.500 | 306.500  | 653.5718   | 306.5000  |                                                                 |                         |    |    |   |   |   |   |
| SGO_0706 | 2.946                  | 6.245                | 0.0001  | 0.0001  | 15.000  | 3.000    | 32.6913    | 3.1221    | phoH-like protein                                               |                         |    |    |   |   |   |   |
|          |                        |                      |         |         | 14.500  | 6.000    | 34.0280    | 6.0000    |                                                                 |                         |    |    |   |   |   |   |

- Show detected proteins only  
 Show all proteins

Proteins found:  
769

Filter by category:

ABC Transporter

Test

Cutoff

q-Value

.005

p-Value

|             | Signif | Direction | Applies To   |
|-------------|--------|-----------|--------------|
| Red         | yes    | +         | ratios, bars |
| Yellow      | no     | n/a       | bars         |
| Green       | yes    | -         | ratios, bars |
| Pink        | yes    | +         | p-, q-Values |
| Light Green | yes    | -         | p-, q-Values |

Dot Plots Dot Plots

Summary Table

SgFn vs Sg

SgPg vs Sg

SgPgFn vs Sg

SgPg vs SgFn

SgPgFn vs SgFn

SgPgFn vs SgPg

Coverage

| Protein  | SgFn vs Sg             |                      |         |         | Raw     |         | Normalized |          | Description                              | Log <sub>2</sub> Ratios |    |    |   |   |   |   |
|----------|------------------------|----------------------|---------|---------|---------|---------|------------|----------|------------------------------------------|-------------------------|----|----|---|---|---|---|
|          | Log <sub>2</sub> Ratio | Log <sub>2</sub> Sum | q-Value | p-Value | SgFn    | Sg      | SgFn       | Sg       |                                          | -6                      | -4 | -2 | 0 | 2 | 4 | 6 |
| SGO_0707 | 0.131                  | 9.804                | 0.0405  | 0.2218  | 118.500 | 206.000 | 258.2615   | 214.3862 | LPXTG cell wall surface protein          |                         |    |    |   |   |   |   |
|          |                        |                      |         |         | 89.500  | 211.000 | 210.0347   | 211.0000 |                                          |                         |    |    |   |   |   |   |
| SGO_0708 | 3.041                  | 11.420               | 0.0000  | 0.0000  | 564.500 | 137.000 | 1230.2837  | 142.5772 | ald; alanine dehydrogenase               |                         |    |    |   |   |   |   |
|          |                        |                      |         |         | 516.500 | 154.500 | 1212.0999  | 154.5000 |                                          |                         |    |    |   |   |   |   |
| SGO_0711 | 0.408                  | 4.363                |         |         |         | 8.500   |            | 8.8460   | conserved hypothetical protein TIGR00043 |                         |    |    |   |   |   |   |
|          |                        |                      |         |         | 5.000   |         | 11.7338    |          |                                          |                         |    |    |   |   |   |   |
| SGO_0713 | 1.330                  | 7.661                | 0.0001  | 0.0001  | 32.500  | 29.500  | 70.8312    | 30.7009  | sgg; GTP-binding protein Era             |                         |    |    |   |   |   |   |
|          |                        |                      |         |         | 31.500  | 27.000  | 73.9228    | 27.0000  |                                          |                         |    |    |   |   |   |   |
| SGO_0719 | -0.545                 | 6.065                | 0.0077  | 0.0282  | 5.500   | 17.000  | 11.9868    | 17.6921  | rnr; ribonuclease R                      |                         |    |    |   |   |   |   |
|          |                        |                      |         |         | 6.500   | 22.000  | 15.2539    | 22.0000  |                                          |                         |    |    |   |   |   |   |
| SGO_0721 | 0.551                  | 5.573                | 0.0013  | 0.0026  | 6.500   | 8.500   | 14.1662    | 8.8460   | abpB-like dipeptidase lipoprotein        |                         |    |    |   |   |   |   |
|          |                        |                      |         |         | 6.000   | 10.500  | 14.0805    | 10.5000  |                                          |                         |    |    |   |   |   |   |
| SGO_0722 | -0.229                 | 5.726                | 0.0706  | 0.4330  | 5.000   | 7.500   | 10.8971    | 7.8053   | tehB; tellurite resistance protein TehB  |                         |    |    |   |   |   |   |
|          |                        |                      |         |         | 5.000   | 22.500  | 11.7338    | 22.5000  |                                          |                         |    |    |   |   |   |   |
| SGO_0724 | -1.628                 | 6.596                | 0.0007  | 0.0011  | 4.500   | 32.500  | 9.8074     | 33.8231  | dipeptidase                              |                         |    |    |   |   |   |   |
|          |                        |                      |         |         | 6.000   | 39.000  | 14.0805    | 39.0000  |                                          |                         |    |    |   |   |   |   |
| SGO_0736 | 0.917                  | 6.466                | 0.0009  | 0.0015  | 12.500  | 16.000  | 27.2428    | 16.6514  | hprK; HPr(Ser) kinase/phosphatase        |                         |    |    |   |   |   |   |
|          |                        |                      |         |         | 13.000  | 14.000  | 30.5078    | 14.0000  |                                          |                         |    |    |   |   |   |   |
| SGO_0739 | -0.567                 | 4.807                | 0.0334  | 0.1759  |         | 11.000  |            | 11.4478  | hypothetical protein SGO_0739            |                         |    |    |   |   |   |   |
|          |                        |                      |         |         | 3.000   | 9.500   | 7.0403     | 9.5000   |                                          |                         |    |    |   |   |   |   |
| SGO_0742 | 0.753                  | 6.494                | 0.0004  | 0.0005  | 13.000  | 15.000  | 28.3325    | 15.6106  | peptidase, U32 family                    |                         |    |    |   |   |   |   |
|          |                        |                      |         |         | 12.000  | 18.000  | 28.1611    | 18.0000  |                                          |                         |    |    |   |   |   |   |
| SGO_0743 | -2.254                 | 7.696                | 0.0001  | 0.0000  | 9.000   | 80.000  | 19.6148    | 83.2568  | peptidase, U32 family                    |                         |    |    |   |   |   |   |
|          |                        |                      |         |         | 7.000   | 88.000  | 16.4273    | 88.0000  |                                          |                         |    |    |   |   |   |   |

- Show detected proteins only
- Show all proteins

Proteins found: 769

Filter by category:

ABC Transporter

Test

Cutoff

q-Value

.005

p-Value

|             | Signif | Direction | Applies To   |
|-------------|--------|-----------|--------------|
| Red         | yes    | +         | ratios, bars |
| Yellow      | no     | n/a       | bars         |
| Green       | yes    | -         | ratios, bars |
| Pink        | yes    | +         | p-, q-Values |
| Light Green | yes    | -         | p-, q-Values |

Dot Plots Dot Plots

Summary Table

SgFn vs Sg

SgPg vs Sg

SgPgFn vs Sg

SgPg vs SgFn

SgPgFn vs SgFn

SgPgFn vs SgPg

Coverage

| Protein  | SgFn vs Sg             |                      |         |         | Raw      |          | Normalized |           | Description                                               | Log <sub>2</sub> Ratios |    |    |   |   |   |   |
|----------|------------------------|----------------------|---------|---------|----------|----------|------------|-----------|-----------------------------------------------------------|-------------------------|----|----|---|---|---|---|
|          | Log <sub>2</sub> Ratio | Log <sub>2</sub> Sum | q-Value | p-Value | SgFn     | Sg       | SgFn       | Sg        |                                                           | -6                      | -4 | -2 | 0 | 2 | 4 | 6 |
| SGO_0745 | 1.409                  | 5.643                | 0.0205  | 0.0948  |          | 8.000    |            | 8.3257    | hypothetical protein SGO_0745                             |                         |    |    |   |   |   |   |
|          |                        |                      |         |         | 12.000   | 13.500   | 28.1611    | 13.5000   |                                                           |                         |    |    |   |   |   |   |
| SGO_0749 | 2.313                  | 7.691                | 0.0032  | 0.0094  | 30.500   | 13.000   | 66.4724    | 13.5292   | glutathione reductase                                     |                         |    |    |   |   |   |   |
|          |                        |                      |         |         | 45.000   | 21.000   | 105.6041   | 21.0000   |                                                           |                         |    |    |   |   |   |   |
| SGO_0750 | -5.485                 | 10.400               | 0.0005  | 0.0007  | 6.000    | 708.000  | 13.0765    | 736.8224  | efflux transporter, RND family, MFP subunit subfamily     |                         |    |    |   |   |   |   |
|          |                        |                      |         |         | 7.000    | 584.500  | 16.4273    | 584.5000  |                                                           |                         |    |    |   |   |   |   |
| SGO_0751 | -3.035                 | 7.519                | 0.0002  | 0.0002  | 3.500    | 82.500   | 7.6280     | 85.8585   | ABC transporter, ATP-binding protein SP0786               |                         |    |    |   |   |   |   |
|          |                        |                      |         |         | 5.500    | 77.000   | 12.9072    | 77.0000   |                                                           |                         |    |    |   |   |   |   |
| SGO_0753 | -0.738                 | 8.826                | 0.0084  | 0.0316  | 50.000   | 144.000  | 108.9711   | 149.8622  | lysS; lysyl-tRNA synthetase                               |                         |    |    |   |   |   |   |
|          |                        |                      |         |         | 27.500   | 130.500  | 64.5358    | 130.5000  |                                                           |                         |    |    |   |   |   |   |
| SGO_0755 | 0.217                  | 5.320                | 0.0517  | 0.2947  | 4.000    | 8.000    | 8.7177     | 8.3257    | regulatory protein                                        |                         |    |    |   |   |   |   |
|          |                        |                      |         |         | 5.500    | 10.000   | 12.9072    | 10.0000   |                                                           |                         |    |    |   |   |   |   |
| SGO_0760 | 0.523                  | 9.217                | 0.0019  | 0.0046  | 75.000   | 117.000  | 163.4567   | 121.7630  | ppc; phosphoenolpyruvate carboxylase                      |                         |    |    |   |   |   |   |
|          |                        |                      |         |         | 80.000   | 122.000  | 187.7405   | 122.0000  |                                                           |                         |    |    |   |   |   |   |
| SGO_0761 | 0.986                  | 13.763               | 0.0007  | 0.0011  | 1976.000 | 2223.000 | 4306.5379  | 2313.4975 | tuf; translation elongation factor Tu                     |                         |    |    |   |   |   |   |
|          |                        |                      |         |         | 2103.500 | 2341.000 | 4936.4031  | 2341.0000 |                                                           |                         |    |    |   |   |   |   |
| SGO_0762 | -0.128                 | 10.618               | 0.0596  | 0.3510  | 150.500  | 384.500  | 328.0030   | 400.1528  | tpiA; triosephosphate isomerase                           |                         |    |    |   |   |   |   |
|          |                        |                      |         |         | 181.500  | 417.000  | 425.9364   | 417.0000  |                                                           |                         |    |    |   |   |   |   |
| SGO_0763 | -0.883                 | 8.224                | 0.0007  | 0.0010  | 24.500   | 87.500   | 53.3958    | 91.0621   | murA-1; UDP-N-acetylglucosamine 1-carboxyvinyltransferase |                         |    |    |   |   |   |   |
|          |                        |                      |         |         | 22.000   | 103.000  | 51.6287    | 103.0000  |                                                           |                         |    |    |   |   |   |   |
| SGO_0767 | 0.649                  | 5.851                | 0.0207  | 0.0965  | 10.500   | 11.000   | 22.8839    | 11.4478   | transport protein                                         |                         |    |    |   |   |   |   |
|          |                        |                      |         |         | 5.500    | 10.500   | 12.9072    | 10.5000   |                                                           |                         |    |    |   |   |   |   |
| SGO_0771 | 1.357                  | 8.365                | 0.0016  | 0.0037  | 58.500   | 56.000   | 127.4962   | 58.2797   | pepq; proline dipeptidase                                 |                         |    |    |   |   |   |   |
|          |                        |                      |         |         | 46.000   | 36.000   | 107.9508   | 36.0000   |                                                           |                         |    |    |   |   |   |   |

- Show detected proteins only
- Show all proteins

Proteins found: 769

Filter by category:

ABC Transporter

Test

Cutoff

q-Value

.005

p-Value

|             | Signif | Direction | Applies To   |
|-------------|--------|-----------|--------------|
| Red         | yes    | +         | ratios, bars |
| Yellow      | no     | n/a       | bars         |
| Green       | yes    | -         | ratios, bars |
| Pink        | yes    | +         | p-, q-Values |
| Light Green | yes    | -         | p-, q-Values |

Dot Plots Dot Plots



Summary Table

SgFn vs Sg

SgPg vs Sg

SgPgFn vs Sg

SgPg vs SgFn

SgPgFn vs SgFn

SgPgFn vs SgPg

Coverage

SgFn vs Sg

Raw

Normalized

Log<sub>2</sub> Ratios

| Protein  | SgFn vs Sg             |                      |         |         | Raw    |         | Normalized |          | Description                                               | Log <sub>2</sub> Ratios |    |    |   |   |
|----------|------------------------|----------------------|---------|---------|--------|---------|------------|----------|-----------------------------------------------------------|-------------------------|----|----|---|---|
|          | Log <sub>2</sub> Ratio | Log <sub>2</sub> Sum | q-Value | p-Value | SgFn   | Sg      | SgFn       | Sg       |                                                           | -6                      | -4 | -2 | 0 | 2 |
| SGO_0773 | -2.320                 | 10.237               | 0.0002  | 0.0001  | 42.500 | 508.000 | 92.6254    | 528.6805 | ccpA; catabolite control protein A                        |                         |    |    |   |   |
|          |                        |                      |         |         | 46.500 | 476.500 | 109.1242   | 476.5000 |                                                           |                         |    |    |   |   |
| SGO_0774 | -1.831                 | 7.074                | 0.0009  | 0.0018  | 6.500  | 56.500  | 14.1662    | 58.8001  | glycosyl transferase, group 1 family protein              |                         |    |    |   |   |
|          |                        |                      |         |         | 6.500  | 46.500  | 15.2539    | 46.5000  |                                                           |                         |    |    |   |   |
| SGO_0775 | -0.533                 | 6.511                | 0.0127  | 0.0537  | 7.000  | 28.500  | 15.2560    | 29.6602  | glycosyl transferase, group 1                             |                         |    |    |   |   |
|          |                        |                      |         |         | 9.500  | 24.000  | 22.2942    | 24.0000  |                                                           |                         |    |    |   |   |
| SGO_0778 | -0.632                 | 9.020                | 0.0003  | 0.0002  | 45.500 | 148.000 | 99.1637    | 154.0250 | thrS; threonyl-tRNA synthetase                            |                         |    |    |   |   |
|          |                        |                      |         |         | 44.500 | 161.500 | 104.4307   | 161.5000 |                                                           |                         |    |    |   |   |
| SGO_0779 | 1.732                  | 7.769                | 0.0006  | 0.0008  | 40.500 | 19.500  | 88.2666    | 20.2938  | response regulator                                        |                         |    |    |   |   |
|          |                        |                      |         |         | 33.500 | 31.000  | 78.6164    | 31.0000  |                                                           |                         |    |    |   |   |
| SGO_0780 | -1.119                 | 5.893                | 0.0058  | 0.0196  | 5.500  | 22.500  | 11.9868    | 23.4160  | histidine kinase                                          |                         |    |    |   |   |
|          |                        |                      |         |         | 3.000  | 17.000  | 7.0403     | 17.0000  |                                                           |                         |    |    |   |   |
| SGO_0781 | -1.851                 | 5.277                | 0.0213  | 0.0999  |        | 14.500  |            | 15.0903  | vicX; Zn-dependent hydrolase (beta-lactamase superfamily) |                         |    |    |   |   |
|          |                        |                      |         |         | 2.000  | 19.000  | 4.6935     | 19.0000  |                                                           |                         |    |    |   |   |
| SGO_0784 | -1.644                 | 8.363                | 0.0015  | 0.0033  | 14.500 | 105.500 | 31.6016    | 109.7949 | smc; chromosome segregation protein SMC                   |                         |    |    |   |   |
|          |                        |                      |         |         | 21.000 | 138.500 | 49.2819    | 138.5000 |                                                           |                         |    |    |   |   |
| SGO_0785 | -0.328                 | 4.940                | 0.0462  | 0.2608  | 4.000  | 11.500  | 8.7177     | 11.9682  | Cof family protein                                        |                         |    |    |   |   |
|          |                        |                      |         |         |        | 10.000  |            | 10.0000  |                                                           |                         |    |    |   |   |
| SGO_0786 | -1.050                 | 4.921                | 0.0257  | 0.1273  |        | 10.500  |            | 10.9275  | Cof family protein                                        |                         |    |    |   |   |
|          |                        |                      |         |         | 2.500  | 13.500  | 5.8669     | 13.5000  |                                                           |                         |    |    |   |   |
| SGO_0787 | -0.721                 | 7.421                | 0.0055  | 0.0182  | 17.500 | 56.000  | 38.1399    | 58.2797  | ftsY; cell division protein FtsY                          |                         |    |    |   |   |
|          |                        |                      |         |         | 11.500 | 48.000  | 26.9877    | 48.0000  |                                                           |                         |    |    |   |   |
| SGO_0788 | 2.261                  | 8.231                | 0.0012  | 0.0024  | 49.000 | 27.000  | 106.7917   | 28.0992  | zwf; glucose-6-phosphate 1-dehydrogenase                  |                         |    |    |   |   |
|          |                        |                      |         |         | 60.500 | 23.500  | 141.9788   | 23.5000  |                                                           |                         |    |    |   |   |

- Show detected proteins only  
 Show all proteins

Proteins found:  
769

Filter by category:

ABC Transporter

Test

Cutoff

q-Value

.005

p-Value

|             | Signif | Direction | Applies To   |
|-------------|--------|-----------|--------------|
| Red         | yes    | +         | ratios, bars |
| Yellow      | no     | n/a       | bars         |
| Green       | yes    | -         | ratios, bars |
| Pink        | yes    | +         | p-, q-Values |
| Light Green | yes    | -         | p-, q-Values |

Dot Plots Dot Plots

Summary Table

SgFn vs Sg

SgPg vs Sg

SgPgFn vs Sg

SgPg vs SgFn

SgPgFn vs SgFn

SgPgFn vs SgPg

Coverage

SgFn vs Sg

Raw

Normalized

Log<sub>2</sub> Ratios

| Protein  | SgFn vs Sg             |                      |         |         | Raw    |        | Normalized |         | Description                                                      | Log <sub>2</sub> Ratios |    |    |   |   |
|----------|------------------------|----------------------|---------|---------|--------|--------|------------|---------|------------------------------------------------------------------|-------------------------|----|----|---|---|
|          | Log <sub>2</sub> Ratio | Log <sub>2</sub> Sum | q-Value | p-Value | SgFn   | Sg     | SgFn       | Sg      |                                                                  | -6                      | -4 | -2 | 0 | 2 |
| SGO_0792 | -1.830                 | 6.869                | 0.0014  | 0.0031  | 7.000  | 38.000 | 15.2560    | 39.5470 | hypothetical protein SGO_0792                                    |                         |    |    |   |   |
|          |                        |                      |         |         | 4.500  | 51.500 | 10.5604    | 51.5000 |                                                                  |                         |    |    |   |   |
| SGO_0794 | 0.304                  | 7.978                | 0.0206  | 0.0955  | 28.000 | 50.000 | 61.0238    | 52.0355 | metallo-beta-lactamase family protein                            |                         |    |    |   |   |
|          |                        |                      |         |         | 33.500 | 60.500 | 78.6164    | 60.5000 |                                                                  |                         |    |    |   |   |
| SGO_0795 | 2.063                  | 5.813                | 0.0022  | 0.0058  | 8.500  | 5.500  | 18.5251    | 5.7239  | tributyryn esterase                                              |                         |    |    |   |   |
|          |                        |                      |         |         | 11.500 | 5.000  | 26.9877    | 5.0000  |                                                                  |                         |    |    |   |   |
| SGO_0797 | -0.613                 | 4.048                |         |         | 3.000  |        | 6.5383     |         | RocB protein, putative                                           |                         |    |    |   |   |
|          |                        |                      |         |         |        | 10.000 |            | 10.0000 |                                                                  |                         |    |    |   |   |
| SGO_0798 | -1.060                 | 7.828                | 0.0009  | 0.0017  | 16.500 | 80.000 | 35.9605    | 83.2568 | ABC transporter, ATP-binding protein SP1381                      |                         |    |    |   |   |
|          |                        |                      |         |         | 16.000 | 70.500 | 37.5481    | 70.5000 |                                                                  |                         |    |    |   |   |
| SGO_0800 | -2.065                 | 6.313                | 0.0072  | 0.0261  | 3.500  | 21.000 | 7.6280     | 21.8549 | polysaccharide deacetylase family protein                        |                         |    |    |   |   |
|          |                        |                      |         |         | 3.000  | 43.000 | 7.0403     | 43.0000 |                                                                  |                         |    |    |   |   |
| SGO_0801 | 0.572                  | 8.591                | 0.0014  | 0.0028  | 54.500 | 80.500 | 118.7785   | 83.7771 | hom; homoserine dehydrogenase                                    |                         |    |    |   |   |
|          |                        |                      |         |         | 47.500 | 71.500 | 111.4710   | 71.5000 |                                                                  |                         |    |    |   |   |
| SGO_0802 | 0.760                  | 6.777                | 0.0003  | 0.0003  | 16.000 | 18.500 | 34.8708    | 19.2531 | thrB; homoserine kinase                                          |                         |    |    |   |   |
|          |                        |                      |         |         | 14.500 | 21.500 | 34.0280    | 21.5000 |                                                                  |                         |    |    |   |   |
| SGO_0804 | 0.475                  | 5.314                | 0.0954  | 0.6141  | 4.000  | 4.000  | 8.7177     | 4.1628  | murB; UDP-N-acetylenolpyruvoylglucosamine reductase              |                         |    |    |   |   |
|          |                        |                      |         |         | 5.500  | 14.000 | 12.9072    | 14.0000 |                                                                  |                         |    |    |   |   |
| SGO_0805 | -1.847                 | 6.699                | 0.0005  | 0.0007  | 4.500  | 42.000 | 9.8074     | 43.7098 | potA; spermidine/putrescine ABC transporter, ATP-binding subunit |                         |    |    |   |   |
|          |                        |                      |         |         | 5.500  | 37.500 | 12.9072    | 37.5000 |                                                                  |                         |    |    |   |   |
| SGO_0808 | -3.175                 | 6.779                | 0.0410  | 0.2259  | 2.500  | 33.500 | 5.4486     | 34.8638 | potD; spermidine/putrescine ABC transporter                      |                         |    |    |   |   |
|          |                        |                      |         |         |        | 69.500 |            | 69.5000 |                                                                  |                         |    |    |   |   |
| SGO_0812 | 1.605                  | 6.051                | 0.0014  | 0.0029  | 10.000 | 8.500  | 21.7942    | 8.8460  | hypothetical protein SGO_0812                                    |                         |    |    |   |   |
|          |                        |                      |         |         | 12.000 | 7.500  | 28.1611    | 7.5000  |                                                                  |                         |    |    |   |   |

 Show detected proteins only Show all proteinsProteins found:  
769 Filter by category:

ABC Transporter

Test

Cutoff

q-Value

.005

p-Value

|             | Signif | Direction | Applies To   |
|-------------|--------|-----------|--------------|
| Red         | yes    | +         | ratios, bars |
| Yellow      | no     | n/a       | bars         |
| Green       | yes    | -         | ratios, bars |
| Pink        | yes    | +         | p-, q-Values |
| Light Green | yes    | -         | p-, q-Values |

Dot Plots Dot Plots

Summary Table

SgFn vs Sg

SgPg vs Sg

SgPgFn vs Sg

SgPg vs SgFn

SgPgFn vs SgFn

SgPgFn vs SgPg

Coverage

SgFn vs Sg

Raw

Normalized

Log<sub>2</sub> Ratios

| Protein  | SgFn vs Sg             |                      |         |         | Raw     |         | Normalized |          | Description                              | Log <sub>2</sub> Ratios |    |    |   |   |   |
|----------|------------------------|----------------------|---------|---------|---------|---------|------------|----------|------------------------------------------|-------------------------|----|----|---|---|---|
|          | Log <sub>2</sub> Ratio | Log <sub>2</sub> Sum | q-Value | p-Value | SgFn    | Sg      | SgFn       | Sg       |                                          | -6                      | -4 | -2 | 0 | 2 | 4 |
| SGO_0813 | 0.162                  | 3.519                | 0.0963  | 0.6216  | 1.500   |         | 3.2691     |          | fructose-bisphosphatase                  |                         |    |    |   |   |   |
|          |                        |                      |         |         | 2.000   | 3.500   | 4.6935     | 3.5000   |                                          |                         |    |    |   |   |   |
| SGO_0815 | -1.223                 | 7.201                | 0.0008  | 0.0014  | 9.000   | 46.000  | 19.6148    | 47.8726  | thiI; thiamine biosynthesis protein ThiI |                         |    |    |   |   |   |
|          |                        |                      |         |         | 10.500  | 55.000  | 24.6409    | 55.0000  |                                          |                         |    |    |   |   |   |
| SGO_0818 | -0.991                 | 7.586                | 0.0392  | 0.2131  | 17.500  | 87.000  | 38.1399    | 90.5417  | rplU; ribosomal protein L21              |                         |    |    |   |   |   |
|          |                        |                      |         |         |         | 63.500  |            | 63.5000  |                                          |                         |    |    |   |   |   |
| SGO_0820 | -0.660                 | 7.245                | 0.0675  | 0.4089  |         | 72.500  |            | 75.4514  | rpmA; ribosomal protein L27              |                         |    |    |   |   |   |
|          |                        |                      |         |         | 15.000  | 41.000  | 35.2014    | 41.0000  |                                          |                         |    |    |   |   |   |
| SGO_0823 | 0.742                  | 4.129                | 0.0368  | 0.1974  | 3.500   |         | 7.6280     |          | Cof family protein                       |                         |    |    |   |   |   |
|          |                        |                      |         |         | 2.500   | 4.000   | 5.8669     | 4.0000   |                                          |                         |    |    |   |   |   |
| SGO_0824 | 0.590                  | 7.350                | 0.0082  | 0.0310  | 22.500  | 25.000  | 49.0370    | 26.0177  | lepA; GTP-binding protein LepA           |                         |    |    |   |   |   |
|          |                        |                      |         |         | 20.500  | 40.000  | 48.1085    | 40.0000  |                                          |                         |    |    |   |   |   |
| SGO_0825 | -2.331                 | 6.193                | 0.0250  | 0.1222  | 3.000   | 27.000  | 6.5383     | 28.0992  | lipoprotein, putative                    |                         |    |    |   |   |   |
|          |                        |                      |         |         |         | 38.500  |            | 38.5000  |                                          |                         |    |    |   |   |   |
| SGO_0830 | 1.409                  | 3.045                | 0.0116  | 0.0479  |         | 1.500   |            | 1.5611   | uvrC; excinuclease ABC, C subunit        |                         |    |    |   |   |   |
|          |                        |                      |         |         | 2.000   | 2.000   | 4.6935     | 2.0000   |                                          |                         |    |    |   |   |   |
| SGO_0832 | -3.238                 | 6.446                | 0.0184  | 0.0838  | 2.000   | 44.500  | 4.3588     | 46.3116  | hypothetical protein SGO_0832            |                         |    |    |   |   |   |
|          |                        |                      |         |         |         | 36.500  |            | 36.5000  |                                          |                         |    |    |   |   |   |
| SGO_0834 | -1.079                 | 4.671                | 0.0550  | 0.3178  |         | 7.000   |            | 7.2850   | hypothetical protein SGO_0834            |                         |    |    |   |   |   |
|          |                        |                      |         |         | 2.000   | 13.500  | 4.6935     | 13.5000  |                                          |                         |    |    |   |   |   |
| SGO_0835 | 2.378                  | 8.920                | 0.0001  | 0.0000  | 93.000  | 32.500  | 202.6862   | 33.8231  | nitroreductase                           |                         |    |    |   |   |   |
|          |                        |                      |         |         | 86.500  | 45.000  | 202.9945   | 45.0000  |                                          |                         |    |    |   |   |   |
| SGO_0836 | 1.291                  | 9.572                | 0.0004  | 0.0004  | 130.500 | 99.000  | 284.4146   | 103.0303 | pepV; dipeptidase PepV                   |                         |    |    |   |   |   |
|          |                        |                      |         |         | 109.000 | 118.000 | 255.7965   | 118.0000 |                                          |                         |    |    |   |   |   |

- Show detected proteins only  
 Show all proteins

Proteins found:  
769

Filter by category:

ABC Transporter

Test

Cutoff

q-Value

.005

p-Value

|             | Signif | Direction | Applies To   |
|-------------|--------|-----------|--------------|
| Red         | yes    | +         | ratios, bars |
| Yellow      | no     | n/a       | bars         |
| Green       | yes    | -         | ratios, bars |
| Pink        | yes    | +         | p-, q-Values |
| Light Green | yes    | -         | p-, q-Values |

Dot Plots Dot Plots

Summary Table

SgFn vs Sg

SgPg vs Sg

SgPgFn vs Sg

SgPg vs SgFn

SgPgFn vs SgFn

SgPgFn vs SgPg

Coverage

| Protein  | SgFn vs Sg             |                      |         |         | Raw    |         | Normalized |          | Description                                       | Log <sub>2</sub> Ratios |    |    |   |   |
|----------|------------------------|----------------------|---------|---------|--------|---------|------------|----------|---------------------------------------------------|-------------------------|----|----|---|---|
|          | Log <sub>2</sub> Ratio | Log <sub>2</sub> Sum | q-Value | p-Value | SgFn   | Sg      | SgFn       | Sg       |                                                   | -6                      | -4 | -2 | 0 | 2 |
| SGO_0841 | 4.736                  | 7.573                | 0.0111  | 0.0444  | 40.000 |         | 87.1769    |          | oxidoreductase                                    |                         |    |    |   |   |
|          |                        |                      |         |         | 42.500 | 3.500   | 99.7372    | 3.5000   |                                                   |                         |    |    |   |   |
| SGO_0842 | 2.744                  | 6.552                | 0.0028  | 0.0078  | 22.500 | 3.500   | 49.0370    | 3.6425   | rhodanese family protein                          |                         |    |    |   |   |
|          |                        |                      |         |         | 13.500 | 9.500   | 31.6812    | 9.5000   |                                                   |                         |    |    |   |   |
| SGO_0848 | -0.727                 | 7.350                | 0.0071  | 0.0254  | 18.000 | 48.500  | 39.2296    | 50.4744  | rpmE; ribosomal protein L31                       |                         |    |    |   |   |
|          |                        |                      |         |         | 10.000 | 50.000  | 23.4676    | 50.0000  |                                                   |                         |    |    |   |   |
| SGO_0849 | 0.752                  | 6.415                | 0.0126  | 0.0528  | 15.000 | 13.000  | 32.6913    | 13.5292  | DHH subfamily 1 protein                           |                         |    |    |   |   |
|          |                        |                      |         |         | 9.000  | 18.000  | 21.1208    | 18.0000  |                                                   |                         |    |    |   |   |
| SGO_0850 | 0.386                  | 6.736                | 0.0152  | 0.0673  | 16.000 | 22.500  | 34.8708    | 23.4160  | flavodoxin                                        |                         |    |    |   |   |
|          |                        |                      |         |         | 11.000 | 22.500  | 25.8143    | 22.5000  |                                                   |                         |    |    |   |   |
| SGO_0851 | 1.157                  | 4.915                | 0.0416  | 0.2304  | 7.000  | 10.000  | 15.2560    | 10.4071  | putative permease                                 |                         |    |    |   |   |
|          |                        |                      |         |         |        | 4.500   |            | 4.5000   |                                                   |                         |    |    |   |   |
| SGO_0852 | 0.346                  | 5.338                | 0.0035  | 0.0103  | 5.000  | 8.000   | 10.8971    | 8.3257   | TPR domain protein                                |                         |    |    |   |   |
|          |                        |                      |         |         | 5.000  | 9.500   | 11.7338    | 9.5000   |                                                   |                         |    |    |   |   |
| SGO_0853 | -0.298                 | 5.096                | 0.0590  | 0.3462  | 3.500  | 13.000  | 7.6280     | 13.5292  | budA; alpha-acetolactate decarboxylase            |                         |    |    |   |   |
|          |                        |                      |         |         | 3.000  | 6.000   | 7.0403     | 6.0000   |                                                   |                         |    |    |   |   |
| SGO_0854 | -2.737                 | 9.701                | 0.0002  | 0.0001  | 33.500 | 336.500 | 73.0106    | 350.1988 | cshA; surface-associated protein CshA             |                         |    |    |   |   |
|          |                        |                      |         |         | 17.000 | 369.500 | 39.8949    | 369.5000 |                                                   |                         |    |    |   |   |
| SGO_0855 | -0.735                 | 5.591                | 0.0050  | 0.0161  | 3.500  | 13.000  | 7.6280     | 13.5292  | fbpA; fibronectin-binding protein A               |                         |    |    |   |   |
|          |                        |                      |         |         | 4.500  | 16.500  | 10.5604    | 16.5000  |                                                   |                         |    |    |   |   |
| SGO_0856 | -3.308                 | 8.206                | 0.0001  | 0.0000  | 5.500  | 124.500 | 11.9868    | 129.5683 | ABC transporter, substrate binding protein        |                         |    |    |   |   |
|          |                        |                      |         |         | 6.500  | 138.500 | 15.2539    | 138.5000 |                                                   |                         |    |    |   |   |
| SGO_0859 | 0.405                  | 7.841                | 0.0093  | 0.0357  | 29.000 | 54.500  | 63.2032    | 56.7187  | pheS; phenylalanyl-tRNA synthetase, alpha subunit |                         |    |    |   |   |
|          |                        |                      |         |         | 28.500 | 42.500  | 66.8826    | 42.5000  |                                                   |                         |    |    |   |   |

- Show detected proteins only
- Show all proteins

Proteins found: 769

Filter by category:

ABC Transporter

Test

Cutoff

q-Value

.005

p-Value

|  | Signif | Direction | Applies To   |
|--|--------|-----------|--------------|
|  | yes    | +         | ratios, bars |
|  | no     | n/a       | bars         |
|  | yes    | -         | ratios, bars |
|  | yes    | +         | p-, q-Values |
|  | yes    | -         | p-, q-Values |

Dot Plots Dot Plots

Summary Table

SgFn vs Sg

SgPg vs Sg

SgPgFn vs Sg

SgPg vs SgFn

SgPgFn vs SgFn

SgPgFn vs SgPg

Coverage

| Protein  | SgFn vs Sg             |                      |         |         | Raw    |         | Normalized |          | Description                                              | Log <sub>2</sub> Ratios |    |    |   |   |
|----------|------------------------|----------------------|---------|---------|--------|---------|------------|----------|----------------------------------------------------------|-------------------------|----|----|---|---|
|          | Log <sub>2</sub> Ratio | Log <sub>2</sub> Sum | q-Value | p-Value | SgFn   | Sg      | SgFn       | Sg       |                                                          | -6                      | -4 | -2 | 0 | 2 |
| SGO_0861 | -0.152                 | 8.497                | 0.0448  | 0.2521  | 35.500 | 99.000  | 77.3695    | 103.0303 | pheT; phenylalanyl-tRNA synthetase, beta subunit         |                         |    |    |   |   |
|          |                        |                      |         |         | 40.000 | 87.000  | 93.8703    | 87.0000  |                                                          |                         |    |    |   |   |
| SGO_0885 | 0.700                  | 6.064                | 0.0149  | 0.0652  | 11.500 | 10.000  | 25.0634    | 10.4071  | cobyrinic acid synthase                                  |                         |    |    |   |   |
|          |                        |                      |         |         | 7.000  | 15.000  | 16.4273    | 15.0000  |                                                          |                         |    |    |   |   |
| SGO_0886 | 0.806                  | 5.586                | 0.0240  | 0.1154  | 7.000  | 5.000   | 15.2560    | 5.2035   | Mur ligase family protein                                |                         |    |    |   |   |
|          |                        |                      |         |         | 6.000  | 13.500  | 14.0805    | 13.5000  |                                                          |                         |    |    |   |   |
| SGO_0889 | -0.553                 | 6.939                | 0.0003  | 0.0003  | 11.500 | 36.000  | 25.0634    | 37.4655  | glmM; phosphoglucosamine mutase                          |                         |    |    |   |   |
|          |                        |                      |         |         | 10.500 | 35.500  | 24.6409    | 35.5000  |                                                          |                         |    |    |   |   |
| SGO_0890 | -1.796                 | 8.439                | 0.0006  | 0.0010  | 24.000 | 126.000 | 52.3061    | 131.1294 | LPXTG cell wall surface protein, collagen binding domain |                         |    |    |   |   |
|          |                        |                      |         |         | 12.000 | 135.500 | 28.1611    | 135.5000 |                                                          |                         |    |    |   |   |
| SGO_0893 | 0.773                  | 7.832                | 0.0005  | 0.0008  | 33.000 | 44.000  | 71.9209    | 45.7912  | GTP-binding protein                                      |                         |    |    |   |   |
|          |                        |                      |         |         | 30.500 | 38.500  | 71.5761    | 38.5000  |                                                          |                         |    |    |   |   |
| SGO_0901 | 0.594                  | 6.466                | 0.0011  | 0.0021  | 11.500 | 17.000  | 25.0634    | 17.6921  | DNA-directed DNA polymerase III                          |                         |    |    |   |   |
|          |                        |                      |         |         | 12.000 | 17.500  | 28.1611    | 17.5000  |                                                          |                         |    |    |   |   |
| SGO_0906 | 3.270                  | 8.067                | 0.0000  | 0.0000  | 56.500 | 10.500  | 123.1373   | 10.9275  | leuA; 2-isopropylmalate synthase                         |                         |    |    |   |   |
|          |                        |                      |         |         | 51.000 | 14.500  | 119.6846   | 14.5000  |                                                          |                         |    |    |   |   |
| SGO_0911 | 1.606                  | 7.986                | 0.0001  | 0.0000  | 45.000 | 29.000  | 98.0740    | 30.1806  | hypothetical protein SGO_0911                            |                         |    |    |   |   |
|          |                        |                      |         |         | 39.500 | 32.500  | 92.6969    | 32.5000  |                                                          |                         |    |    |   |   |
| SGO_0934 | -0.121                 | 3.967                | 0.0745  | 0.4594  | 2.500  |         | 5.4486     |          | galE-2; UDP-glucose 4-epimerase                          |                         |    |    |   |   |
|          |                        |                      |         |         | 2.000  | 5.500   | 4.6935     | 5.5000   |                                                          |                         |    |    |   |   |
| SGO_0946 | 0.714                  | 7.288                | 0.0005  | 0.0007  | 23.000 | 30.000  | 50.1267    | 31.2213  | Deblocking aminopeptidase                                |                         |    |    |   |   |
|          |                        |                      |         |         | 20.000 | 28.000  | 46.9351    | 28.0000  |                                                          |                         |    |    |   |   |
| SGO_0948 | 0.086                  | 6.180                | 0.0837  | 0.5279  | 9.000  | 19.000  | 19.6148    | 19.7735  | pgdA; peptidoglycan N-acetylglucosamine deacetylase A    |                         |    |    |   |   |
|          |                        |                      |         |         | 7.500  | 15.500  | 17.6007    | 15.5000  |                                                          |                         |    |    |   |   |

- Show detected proteins only
- Show all proteins

Proteins found: 769

Filter by category:

ABC Transporter

Test

Cutoff

q-Value

.005

p-Value

|             | Signif | Direction | Applies To   |
|-------------|--------|-----------|--------------|
| Red         | yes    | +         | ratios, bars |
| Yellow      | no     | n/a       | bars         |
| Green       | yes    | -         | ratios, bars |
| Pink        | yes    | +         | p-, q-Values |
| Light Green | yes    | -         | p-, q-Values |

Dot Plots Dot Plots

Summary Table

SgFn vs Sg

SgPg vs Sg

SgPgFn vs Sg

SgPg vs SgFn

SgPgFn vs SgFn

SgPgFn vs SgPg

Coverage

| Protein  | SgFn vs Sg             |                      |         |         | Raw    |         | Normalized |          | Description                                            | Log <sub>2</sub> Ratios |    |    |   |   |   |   |
|----------|------------------------|----------------------|---------|---------|--------|---------|------------|----------|--------------------------------------------------------|-------------------------|----|----|---|---|---|---|
|          | Log <sub>2</sub> Ratio | Log <sub>2</sub> Sum | q-Value | p-Value | SgFn   | Sg      | SgFn       | Sg       |                                                        | -6                      | -4 | -2 | 0 | 2 | 4 | 6 |
| SGO_0949 | -0.475                 | 5.295                | 0.0377  | 0.2032  | 5.000  | 12.500  | 10.8971    | 13.0089  | deaD; DEAD RNA helicase                                |                         |    |    |   |   |   |   |
|          |                        |                      |         |         | 2.500  | 9.500   | 5.8669     | 9.5000   |                                                        |                         |    |    |   |   |   |   |
| SGO_0950 | 1.300                  | 5.753                | 0.0324  | 0.1703  | 12.000 |         | 26.1531    |          | oxidoreductase                                         |                         |    |    |   |   |   |   |
|          |                        |                      |         |         | 8.000  | 9.000   | 18.7741    | 9.0000   |                                                        |                         |    |    |   |   |   |   |
| SGO_0951 | 0.064                  | 6.011                | 0.1114  | 0.7288  | 6.500  | 13.000  | 14.1662    | 13.5292  | udk; uridine kinase                                    |                         |    |    |   |   |   |   |
|          |                        |                      |         |         | 8.000  | 18.000  | 18.7741    | 18.0000  |                                                        |                         |    |    |   |   |   |   |
| SGO_0954 | 0.510                  | 6.460                | 0.0041  | 0.0126  | 13.000 | 18.000  | 28.3325    | 18.7328  | ATP-binding protein                                    |                         |    |    |   |   |   |   |
|          |                        |                      |         |         | 10.000 | 17.500  | 23.4676    | 17.5000  |                                                        |                         |    |    |   |   |   |   |
| SGO_0955 | -0.040                 | 4.797                | 0.1102  | 0.7184  | 3.000  | 5.500   | 6.5383     | 5.7239   | transporter                                            |                         |    |    |   |   |   |   |
|          |                        |                      |         |         | 3.000  | 8.500   | 7.0403     | 8.5000   |                                                        |                         |    |    |   |   |   |   |
| SGO_0957 | -2.699                 | 5.625                | 0.0124  | 0.0518  |        | 20.500  |            | 21.3345  | hypothetical protein SGO_0957                          |                         |    |    |   |   |   |   |
|          |                        |                      |         |         | 1.500  | 24.500  | 3.5201     | 24.5000  |                                                        |                         |    |    |   |   |   |   |
| SGO_0959 | 2.052                  | 5.945                | 0.0046  | 0.0144  | 14.000 | 8.000   | 30.5119    | 8.3257   | copper homeostasis protein CutC                        |                         |    |    |   |   |   |   |
|          |                        |                      |         |         | 8.000  | 4.000   | 18.7741    | 4.0000   |                                                        |                         |    |    |   |   |   |   |
| SGO_0966 | -1.271                 | 6.593                | 0.0003  | 0.0003  | 6.500  | 31.000  | 14.1662    | 32.2620  | hsa; streptococcal hemagglutinin                       |                         |    |    |   |   |   |   |
|          |                        |                      |         |         | 6.000  | 36.000  | 14.0805    | 36.0000  |                                                        |                         |    |    |   |   |   |   |
| SGO_0969 | 0.191                  | 3.585                | 0.0379  | 0.2044  | 2.000  | 3.500   | 4.3588     | 3.6425   | nss; nucleotide sugar synthetase-like protein          |                         |    |    |   |   |   |   |
|          |                        |                      |         |         |        | 4.000   |            | 4.0000   |                                                        |                         |    |    |   |   |   |   |
| SGO_0981 | -1.139                 | 4.303                | 0.0531  | 0.3053  |        | 5.500   |            | 5.7239   | comE operon protein 2 family                           |                         |    |    |   |   |   |   |
|          |                        |                      |         |         | 1.500  | 10.500  | 3.5201     | 10.5000  |                                                        |                         |    |    |   |   |   |   |
| SGO_0982 | -2.577                 | 8.302                | 0.0002  | 0.0002  | 10.000 | 121.500 | 21.7942    | 126.4462 | amino acid ABC transporter, amino acid-binding protein |                         |    |    |   |   |   |   |
|          |                        |                      |         |         | 10.000 | 144.000 | 23.4676    | 144.0000 |                                                        |                         |    |    |   |   |   |   |
| SGO_0987 | 0.344                  | 7.742                | 0.0021  | 0.0052  | 28.000 | 48.000  | 61.0238    | 49.9541  | metK; S-adenosylmethionine synthetase                  |                         |    |    |   |   |   |   |
|          |                        |                      |         |         | 25.000 | 44.500  | 58.6689    | 44.5000  |                                                        |                         |    |    |   |   |   |   |

- Show detected proteins only
- Show all proteins

Proteins found: 769

Filter by category:

ABC Transporter

Test

Cutoff

q-Value

.005

p-Value

|             | Signif | Direction | Applies To   |
|-------------|--------|-----------|--------------|
| Red         | yes    | +         | ratios, bars |
| Yellow      | no     | n/a       | bars         |
| Green       | yes    | -         | ratios, bars |
| Pink        | yes    | +         | p-, q-Values |
| Light Green | yes    | -         | p-, q-Values |

Dot Plots Dot Plots

Summary Table

SgFn vs Sg

SgPg vs Sg

SgPgFn vs Sg

SgPg vs SgFn

SgPgFn vs SgFn

SgPgFn vs SgPg

Coverage

| Protein  | SgFn vs Sg             |                      |         |         | Raw     |        | Normalized |         | Description                                         | Log <sub>2</sub> Ratios |    |    |   |   |
|----------|------------------------|----------------------|---------|---------|---------|--------|------------|---------|-----------------------------------------------------|-------------------------|----|----|---|---|
|          | Log <sub>2</sub> Ratio | Log <sub>2</sub> Sum | q-Value | p-Value | SgFn    | Sg     | SgFn       | Sg      |                                                     | -6                      | -4 | -2 | 0 | 2 |
| SGO_0995 | 1.419                  | 6.066                | 0.0067  | 0.0234  | 9.000   | 5.500  | 19.6148    | 5.7239  | metallo-beta-lactamase superfamily protein          |                         |    |    |   |   |
|          |                        |                      |         |         | 12.000  | 13.500 | 28.1611    | 13.5000 |                                                     |                         |    |    |   |   |
| SGO_0997 | -0.144                 | 5.713                | 0.0609  | 0.3621  | 5.000   | 12.000 | 10.8971    | 12.4885 | hypothetical protein SGO_0997                       |                         |    |    |   |   |
|          |                        |                      |         |         | 6.000   | 15.000 | 14.0805    | 15.0000 |                                                     |                         |    |    |   |   |
| SGO_1000 | 2.968                  | 5.438                | 0.0074  | 0.0270  | 9.000   | 2.500  | 19.6148    | 2.6018  | recJ; single-stranded-DNA-specific exonuclease RecJ |                         |    |    |   |   |
|          |                        |                      |         |         | 9.000   |        | 21.1208    |         |                                                     |                         |    |    |   |   |
| SGO_1001 | 1.289                  | 8.028                | 0.0064  | 0.0223  | 33.000  | 42.500 | 71.9209    | 44.2302 | apt; adenine phosphoribosyltransferase              |                         |    |    |   |   |
|          |                        |                      |         |         | 48.500  | 31.000 | 113.8177   | 31.0000 |                                                     |                         |    |    |   |   |
| SGO_1003 | -0.915                 | 5.035                | 0.0023  | 0.0059  | 2.500   | 11.500 | 5.4486     | 11.9682 | DNA replication protein DnaD                        |                         |    |    |   |   |
|          |                        |                      |         |         | 2.500   | 9.500  | 5.8669     | 9.5000  |                                                     |                         |    |    |   |   |
| SGO_1004 | 0.470                  | 3.945                | 0.0697  | 0.4252  | 2.000   |        | 4.3588     |         | glutathione S-transferase family protein            |                         |    |    |   |   |
|          |                        |                      |         |         | 3.000   | 4.000  | 7.0403     | 4.0000  |                                                     |                         |    |    |   |   |
| SGO_1005 | 0.530                  | 5.015                | 0.0122  | 0.0505  | 5.000   | 5.500  | 10.8971    | 5.7239  | Bcl-2 family protein                                |                         |    |    |   |   |
|          |                        |                      |         |         | 3.500   | 7.500  | 8.2136     | 7.5000  |                                                     |                         |    |    |   |   |
| SGO_1006 | 0.802                  | 2.778                |         |         | 2.000   |        | 4.3588     |         | conserved hypothetical protein TIGR00486            |                         |    |    |   |   |
|          |                        |                      |         |         |         | 2.500  |            | 2.5000  |                                                     |                         |    |    |   |   |
| SGO_1009 | 2.074                  | 9.379                | 0.0003  | 0.0003  | 115.000 | 57.000 | 250.6335   | 59.3204 | rfbA-1; glucose-1-phosphate thymidyltransferase     |                         |    |    |   |   |
|          |                        |                      |         |         | 122.500 | 68.500 | 287.4777   | 68.5000 |                                                     |                         |    |    |   |   |
| SGO_1010 | 0.815                  | 7.342                | 0.0017  | 0.0041  | 26.000  | 28.000 | 56.6650    | 29.1399 | rmIC; dTDP-4-keto-6-deoxyglucose-3,5-epimerase      |                         |    |    |   |   |
|          |                        |                      |         |         | 20.000  | 29.500 | 46.9351    | 29.5000 |                                                     |                         |    |    |   |   |
| SGO_1011 | 2.376                  | 9.181                | 0.0022  | 0.0055  | 90.500  | 35.000 | 197.2377   | 36.4248 | rfbB-1; dTDP-glucose 4,6-dehydratase                |                         |    |    |   |   |
|          |                        |                      |         |         | 123.000 | 58.000 | 288.6511   | 58.0000 |                                                     |                         |    |    |   |   |
| SGO_1012 | 1.633                  | 9.235                | 0.0001  | 0.0000  | 102.500 | 72.000 | 223.3908   | 74.9311 | galE-1; UDP-glucose 4-epimerase                     |                         |    |    |   |   |
|          |                        |                      |         |         | 99.000  | 72.000 | 232.3289   | 72.0000 |                                                     |                         |    |    |   |   |

- Show detected proteins only
- Show all proteins

Proteins found: 769

Filter by category:

ABC Transporter

Test

Cutoff

q-Value

.005

p-Value

|             | Signif | Direction | Applies To   |
|-------------|--------|-----------|--------------|
| Red         | yes    | +         | ratios, bars |
| Yellow      | no     | n/a       | bars         |
| Green       | yes    | -         | ratios, bars |
| Pink        | yes    | +         | p-, q-Values |
| Light Green | yes    | -         | p-, q-Values |

Dot Plots Dot Plots

Summary Table

SgFn vs Sg

SgPg vs Sg

SgPgFn vs Sg

SgPg vs SgFn

SgPgFn vs SgFn

SgPgFn vs SgPg

Coverage

SgFn vs Sg

Raw

Normalized

Log<sub>2</sub> Ratios

| Protein  | SgFn vs Sg             |                      |         |         | Raw    |         | Normalized |          | Description                                            | Log <sub>2</sub> Ratios |    |    |   |   |
|----------|------------------------|----------------------|---------|---------|--------|---------|------------|----------|--------------------------------------------------------|-------------------------|----|----|---|---|
|          | Log <sub>2</sub> Ratio | Log <sub>2</sub> Sum | q-Value | p-Value | SgFn   | Sg      | SgFn       | Sg       |                                                        | -6                      | -4 | -2 | 0 | 2 |
| SGO_1013 | -2.184                 | 6.159                | 0.0202  | 0.0930  |        | 34.500  |            | 35.9045  | Glycosyltransferase involved in cell wall biogenesis   |                         |    |    |   |   |
|          |                        |                      |         |         | 3.000  | 28.500  | 7.0403     | 28.5000  |                                                        |                         |    |    |   |   |
| SGO_1016 | -1.977                 | 5.619                | 0.0303  | 0.1580  | 2.500  | 17.000  | 5.4486     | 17.6921  | putative glycosyltransferase                           |                         |    |    |   |   |
|          |                        |                      |         |         |        | 26.000  |            | 26.0000  |                                                        |                         |    |    |   |   |
| SGO_1019 | -2.526                 | 6.462                | 0.0035  | 0.0105  |        | 39.500  |            | 41.1080  | glycosyl transferase                                   |                         |    |    |   |   |
|          |                        |                      |         |         | 3.000  | 40.000  | 7.0403     | 40.0000  |                                                        |                         |    |    |   |   |
| SGO_1020 | 1.139                  | 7.938                | 0.0003  | 0.0002  | 37.000 | 37.500  | 80.6386    | 39.0266  | rfbD; dTDP-4-dehydrorhamnose reductase                 |                         |    |    |   |   |
|          |                        |                      |         |         | 37.500 | 37.500  | 88.0034    | 37.5000  |                                                        |                         |    |    |   |   |
| SGO_1024 | -2.758                 | 6.575                | 0.0023  | 0.0063  | 2.000  | 31.500  | 4.3588     | 32.7824  | putative polysaccharide ABC transporter                |                         |    |    |   |   |
|          |                        |                      |         |         | 3.500  | 50.000  | 8.2136     | 50.0000  |                                                        |                         |    |    |   |   |
| SGO_1025 | -1.071                 | 6.306                | 0.0103  | 0.0406  | 8.500  | 21.500  | 18.5251    | 22.3753  | rgp; glycosyltransferase                               |                         |    |    |   |   |
|          |                        |                      |         |         | 3.500  | 30.000  | 8.2136     | 30.0000  |                                                        |                         |    |    |   |   |
| SGO_1026 | -1.947                 | 8.073                | 0.0048  | 0.0151  | 10.500 | 77.000  | 22.8839    | 80.1346  | rhamnosyltransferase                                   |                         |    |    |   |   |
|          |                        |                      |         |         | 13.500 | 134.500 | 31.6812    | 134.5000 |                                                        |                         |    |    |   |   |
| SGO_1031 | -0.494                 | 5.534                | 0.0028  | 0.0079  | 4.000  | 13.500  | 8.7177     | 14.0496  | cmk; cytidylate kinase                                 |                         |    |    |   |   |
|          |                        |                      |         |         | 4.500  | 13.000  | 10.5604    | 13.0000  |                                                        |                         |    |    |   |   |
| SGO_1033 | -0.590                 | 7.556                | 0.0312  | 0.1631  | 17.500 | 36.000  | 38.1399    | 37.4655  | rpmI; ribosomal protein L35                            |                         |    |    |   |   |
|          |                        |                      |         |         | 14.500 | 78.500  | 34.0280    | 78.5000  |                                                        |                         |    |    |   |   |
| SGO_1034 | 0.007                  | 9.370                | 0.1242  | 0.8190  | 79.000 | 158.000 | 172.1743   | 164.4321 | rplT; ribosomal protein L20                            |                         |    |    |   |   |
|          |                        |                      |         |         | 68.000 | 165.500 | 159.5795   | 165.5000 |                                                        |                         |    |    |   |   |
| SGO_1035 | 1.252                  | 6.060                | 0.0022  | 0.0058  | 10.000 | 7.000   | 21.7942    | 7.2850   | gloA; lactoylglutathione lyase                         |                         |    |    |   |   |
|          |                        |                      |         |         | 10.500 | 13.000  | 24.6409    | 13.0000  |                                                        |                         |    |    |   |   |
| SGO_1036 | -0.270                 | 7.310                | 0.0668  | 0.4036  | 21.000 | 34.500  | 45.7679    | 35.9045  | amino acid ABC transporter, ATP-binding protein SP1242 |                         |    |    |   |   |
|          |                        |                      |         |         | 11.500 | 50.000  | 26.9877    | 50.0000  |                                                        |                         |    |    |   |   |

- Show detected proteins only  
 Show all proteins

Proteins found:  
769

Filter by category:

ABC Transporter

Test

Cutoff

q-Value

.005

p-Value

|             | Signif | Direction | Applies To   |
|-------------|--------|-----------|--------------|
| Red         | yes    | +         | ratios, bars |
| Yellow      | no     | n/a       | bars         |
| Green       | yes    | -         | ratios, bars |
| Pink        | yes    | +         | p-, q-Values |
| Light Green | yes    | -         | p-, q-Values |

Dot Plots Dot Plots



Summary Table

SgFn vs Sg

SgPg vs Sg

SgPgFn vs Sg

SgPg vs SgFn

SgPgFn vs SgFn

SgPgFn vs SgPg

Coverage

SgFn vs Sg

Raw

Normalized

Log<sub>2</sub> Ratios

| Protein  | SgFn vs Sg             |                      | q-Value | p-Value | Raw    |        | Normalized |         | Description                                                                                                             | Log <sub>2</sub> Ratios |    |    |   |   |
|----------|------------------------|----------------------|---------|---------|--------|--------|------------|---------|-------------------------------------------------------------------------------------------------------------------------|-------------------------|----|----|---|---|
|          | Log <sub>2</sub> Ratio | Log <sub>2</sub> Sum |         |         | SgFn   | Sg     | SgFn       | Sg      |                                                                                                                         | -6                      | -4 | -2 | 0 | 2 |
| SGO_1037 | -2.158                 | 5.957                | 0.0010  | 0.0019  | 1.500  | 23.500 | 3.2691     | 24.4567 | glutamine ABC transporter permease and substrate binding protein                                                        |                         |    |    |   |   |
|          |                        |                      |         |         | 4.000  | 25.000 | 9.3870     | 25.0000 |                                                                                                                         |                         |    |    |   |   |
| SGO_1038 | 1.093                  | 5.266                | 0.0097  | 0.0377  | 7.000  | 4.000  | 15.2560    | 4.1628  | uvrB; excinuclease ABC, B subunit                                                                                       |                         |    |    |   |   |
|          |                        |                      |         |         | 4.500  | 8.500  | 10.5604    | 8.5000  |                                                                                                                         |                         |    |    |   |   |
| SGO_1041 | 1.365                  | 4.298                |         |         | 6.500  |        | 14.1662    |         | hypothetical protein SGO_1041                                                                                           |                         |    |    |   |   |
|          |                        |                      |         |         |        | 5.500  |            | 5.5000  |                                                                                                                         |                         |    |    |   |   |
| SGO_1044 | 2.231                  | 3.094                |         |         |        |        |            |         | MutT/nudix family protein                                                                                               |                         |    |    |   |   |
|          |                        |                      |         |         | 3.000  | 1.500  | 7.0403     | 1.5000  |                                                                                                                         |                         |    |    |   |   |
| SGO_1047 | -2.388                 | 5.361                | 0.0294  | 0.1515  |        | 14.500 |            | 15.0903 | hypothetical protein SGO_1047                                                                                           |                         |    |    |   |   |
|          |                        |                      |         |         | 1.500  | 22.500 | 3.5201     | 22.5000 |                                                                                                                         |                         |    |    |   |   |
| SGO_1050 | 1.494                  | 3.254                |         |         |        |        |            |         | ribF; riboflavin biosynthesis protein RibF                                                                              |                         |    |    |   |   |
|          |                        |                      |         |         | 3.000  | 2.500  | 7.0403     | 2.5000  |                                                                                                                         |                         |    |    |   |   |
| SGO_1059 | -1.598                 | 5.982                | 0.0001  | 0.0001  | 4.000  | 23.000 | 8.7177     | 23.9363 | pstB; Phosphate import ATP-binding protein<br>pstB 1 (Phosphate-transporting ATPase 1)<br>(ABC phosphate transporter 1) |                         |    |    |   |   |
|          |                        |                      |         |         | 3.000  | 23.500 | 7.0403     | 23.5000 |                                                                                                                         |                         |    |    |   |   |
| SGO_1060 | -1.641                 | 7.306                | 0.0009  | 0.0016  | 7.500  | 52.000 | 16.3457    | 54.1169 | phosphate transport system regulatory protein                                                                           |                         |    |    |   |   |
|          |                        |                      |         |         | 9.500  | 65.500 | 22.2942    | 65.5000 |                                                                                                                         |                         |    |    |   |   |
| SGO_1065 | -0.762                 | 6.548                | 0.0014  | 0.0031  | 9.000  | 29.000 | 19.6148    | 30.1806 | hypothetical protein SGO_1065                                                                                           |                         |    |    |   |   |
|          |                        |                      |         |         | 6.500  | 28.500 | 15.2539    | 28.5000 |                                                                                                                         |                         |    |    |   |   |
| SGO_1066 | -0.160                 | 6.695                | 0.0523  | 0.2992  | 10.500 | 22.500 | 22.8839    | 23.4160 | hypothetical protein SGO_1066                                                                                           |                         |    |    |   |   |
|          |                        |                      |         |         | 11.000 | 31.500 | 25.8143    | 31.5000 |                                                                                                                         |                         |    |    |   |   |
| SGO_1067 | 0.317                  | 2.974                |         |         | 2.000  |        | 4.3588     |         | hypothetical protein SGO_1067                                                                                           |                         |    |    |   |   |
|          |                        |                      |         |         |        | 3.500  |            | 3.5000  |                                                                                                                         |                         |    |    |   |   |
| SGO_1069 | 0.425                  | 8.560                | 0.0023  | 0.0062  | 49.000 | 84.000 | 106.7917   | 87.4196 | membrane alanyl aminopeptidase                                                                                          |                         |    |    |   |   |
|          |                        |                      |         |         | 46.500 | 74.000 | 109.1242   | 74.0000 |                                                                                                                         |                         |    |    |   |   |

- Show detected proteins only  
 Show all proteins

Proteins found:  
769

Filter by category:

ABC Transporter

Test

Cutoff

q-Value

.005

p-Value

|             | Signif | Direction | Applies To   |
|-------------|--------|-----------|--------------|
| Red         | yes    | +         | ratios, bars |
| Yellow      | no     | n/a       | bars         |
| Green       | yes    | -         | ratios, bars |
| Pink        | yes    | +         | p-, q-Values |
| Light Green | yes    | -         | p-, q-Values |

Dot Plots Dot Plots

Summary Table

SgFn vs Sg

SgPg vs Sg

SgPgFn vs Sg

SgPg vs SgFn

SgPgFn vs SgFn

SgPgFn vs SgPg

Coverage

| Protein  | SgFn vs Sg             |                      |         |         | Raw      |          | Normalized |           | Description                                   | Log <sub>2</sub> Ratios |    |    |   |   |
|----------|------------------------|----------------------|---------|---------|----------|----------|------------|-----------|-----------------------------------------------|-------------------------|----|----|---|---|
|          | Log <sub>2</sub> Ratio | Log <sub>2</sub> Sum | q-Value | p-Value | SgFn     | Sg       | SgFn       | Sg        |                                               | -6                      | -4 | -2 | 0 | 2 |
| SGO_1072 | 3.899                  | 6.269                | 0.0019  | 0.0046  | 17.000   |          | 37.0502    |           | ciaR; Transcriptional regulatory protein CiaR |                         |    |    |   |   |
|          |                        |                      |         |         | 16.000   | 2.500    | 37.5481    | 2.5000    |                                               |                         |    |    |   |   |
| SGO_1073 | -0.816                 | 5.409                | 0.0184  | 0.0834  |          | 15.000   |            | 15.6106   | Sensor protein CiaH                           |                         |    |    |   |   |
|          |                        |                      |         |         | 4.000    | 17.500   | 9.3870     | 17.5000   |                                               |                         |    |    |   |   |
| SGO_1075 | 2.151                  | 5.320                | 0.0250  | 0.1226  | 9.500    |          | 20.7045    |           | alpha-amylase precursor                       |                         |    |    |   |   |
|          |                        |                      |         |         | 6.500    | 4.000    | 15.2539    | 4.0000    |                                               |                         |    |    |   |   |
| SGO_1077 | -0.574                 | 5.673                | 0.1462  | 0.9937  | 1.500    | 11.500   | 3.2691     | 11.9682   | coaA; pantothenate kinase                     |                         |    |    |   |   |
|          |                        |                      |         |         | 9.500    | 13.500   | 22.2942    | 13.5000   |                                               |                         |    |    |   |   |
| SGO_1079 | 0.866                  | 7.696                | 0.0238  | 0.1139  | 20.000   | 27.500   | 43.5884    | 28.6195   | pdp; pyrimidine-nucleoside phosphorylase      |                         |    |    |   |   |
|          |                        |                      |         |         | 39.500   | 42.500   | 92.6969    | 42.5000   |                                               |                         |    |    |   |   |
| SGO_1080 | -0.018                 | 8.282                | 0.1194  | 0.7822  | 37.000   | 80.500   | 80.6386    | 83.7771   | deoC; deoxyribose-phosphate aldolase          |                         |    |    |   |   |
|          |                        |                      |         |         | 31.500   | 73.000   | 73.9228    | 73.0000   |                                               |                         |    |    |   |   |
| SGO_1082 | -1.703                 | 12.818               | 0.0002  | 0.0001  | 443.000  | 2606.500 | 965.4839   | 2712.6096 | lipoprotein                                   |                         |    |    |   |   |
|          |                        |                      |         |         | 316.500  | 2801.500 | 742.7486   | 2801.5000 |                                               |                         |    |    |   |   |
| SGO_1090 | -0.494                 | 5.182                | 0.0601  | 0.3543  |          | 10.500   |            | 10.9275   | pseudouridine synthase, RluA family           |                         |    |    |   |   |
|          |                        |                      |         |         | 4.000    | 16.000   | 9.3870     | 16.0000   |                                               |                         |    |    |   |   |
| SGO_1096 | 6.559                  | 13.354               | 0.0001  | 0.0000  | 2269.000 | 49.500   | 4945.1085  | 51.5151   | butA; acetoin dehydrogenase                   |                         |    |    |   |   |
|          |                        |                      |         |         | 2308.500 | 58.500   | 5417.4882  | 58.5000   |                                               |                         |    |    |   |   |
| SGO_1097 | 2.446                  | 3.689                |         |         | 5.000    |          | 10.8971    |           | proB; glutamate 5-kinase                      |                         |    |    |   |   |
|          |                        |                      |         |         |          | 2.000    |            | 2.0000    |                                               |                         |    |    |   |   |
| SGO_1098 | 3.518                  | 6.387                | 0.0016  | 0.0037  | 18.500   |          | 40.3193    |           | proA; gamma-glutamyl phosphate reductase      |                         |    |    |   |   |
|          |                        |                      |         |         | 17.000   | 3.500    | 39.8949    | 3.5000    |                                               |                         |    |    |   |   |
| SGO_1099 | 2.177                  | 5.178                | 0.0740  | 0.4560  | 2.000    |          | 4.3588     |           | proC; pyrroline-5-carboxylate reductase       |                         |    |    |   |   |
|          |                        |                      |         |         | 12.500   | 2.500    | 29.3345    | 2.5000    |                                               |                         |    |    |   |   |

- Show detected proteins only
- Show all proteins

Proteins found: 769

Filter by category:

ABC Transporter

Test

Cutoff

q-Value

.005

p-Value

|             | Signif | Direction | Applies To   |
|-------------|--------|-----------|--------------|
| Red         | yes    | +         | ratios, bars |
| Yellow      | no     | n/a       | bars         |
| Green       | yes    | -         | ratios, bars |
| Pink        | yes    | +         | p-, q-Values |
| Light Green | yes    | -         | p-, q-Values |

Dot Plots Dot Plots

Summary Table

SgFn vs Sg

SgPg vs Sg

SgPgFn vs Sg

SgPg vs SgFn

SgPgFn vs SgFn

SgPgFn vs SgPg

Coverage

| Protein  | SgFn vs Sg             |                      |         |         | Raw    |          | Normalized |           | Description                                          | Log <sub>2</sub> Ratios |    |    |   |   |
|----------|------------------------|----------------------|---------|---------|--------|----------|------------|-----------|------------------------------------------------------|-------------------------|----|----|---|---|
|          | Log <sub>2</sub> Ratio | Log <sub>2</sub> Sum | q-Value | p-Value | SgFn   | Sg       | SgFn       | Sg        |                                                      | -6                      | -4 | -2 | 0 | 2 |
| SGO_1104 | -0.461                 | 4.724                | 0.0114  | 0.0463  |        | 9.500    |            | 9.8867    | carB; carbamoyl-phosphate synthase, large subunit    |                         |    |    |   |   |
|          |                        |                      |         |         | 3.000  | 9.500    | 7.0403     | 9.5000    |                                                      |                         |    |    |   |   |
| SGO_1107 | -1.932                 | 4.963                | 0.0370  | 0.1991  |        | 16.500   |            | 17.1717   | PyrR bifunctional protein                            |                         |    |    |   |   |
|          |                        |                      |         |         | 1.500  | 10.500   | 3.5201     | 10.5000   |                                                      |                         |    |    |   |   |
| SGO_1109 | -1.562                 | 7.655                | 0.0005  | 0.0008  | 11.500 | 66.500   | 25.0634    | 69.2072   | pyrB; aspartate carbamoyltransferase                 |                         |    |    |   |   |
|          |                        |                      |         |         | 11.000 | 81.500   | 25.8143    | 81.5000   |                                                      |                         |    |    |   |   |
| SGO_1110 | -2.330                 | 6.283                | 0.0068  | 0.0242  |        | 33.000   |            | 34.3434   | surface antigen SCP-like domain                      |                         |    |    |   |   |
|          |                        |                      |         |         | 3.000  | 36.500   | 7.0403     | 36.5000   |                                                      |                         |    |    |   |   |
| SGO_1111 | -2.986                 | 6.930                | 0.0008  | 0.0012  | 3.000  | 45.500   | 6.5383     | 47.3523   | fruR; phosphotransferase system repressor            |                         |    |    |   |   |
|          |                        |                      |         |         | 3.000  | 61.000   | 7.0403     | 61.0000   |                                                      |                         |    |    |   |   |
| SGO_1112 | -2.373                 | 7.196                | 0.0001  | 0.0000  | 5.000  | 58.000   | 10.8971    | 60.3612   | fruB; 1-phosphofructokinase                          |                         |    |    |   |   |
|          |                        |                      |         |         | 5.500  | 62.500   | 12.9072    | 62.5000   |                                                      |                         |    |    |   |   |
| SGO_1113 | -4.663                 | 11.177               | 0.0000  | 0.0000  | 30.000 | 1053.000 | 65.3827    | 1095.8672 | fruA; PTS system, fructose specific IIABC components |                         |    |    |   |   |
|          |                        |                      |         |         | 12.500 | 1124.000 | 29.3345    | 1124.0000 |                                                      |                         |    |    |   |   |
| SGO_1114 | -2.537                 | 6.777                | 0.0003  | 0.0002  | 5.000  | 46.500   | 10.8971    | 48.3930   | Protein of unknown function (DUF1149) superfamily    |                         |    |    |   |   |
|          |                        |                      |         |         | 2.500  | 44.500   | 5.8669     | 44.5000   |                                                      |                         |    |    |   |   |
| SGO_1115 | 2.947                  | 4.930                |         |         |        |          |            |           | DegV family protein                                  |                         |    |    |   |   |
|          |                        |                      |         |         | 11.500 | 3.500    | 26.9877    | 3.5000    |                                                      |                         |    |    |   |   |
| SGO_1116 | 2.419                  | 6.592                | 0.0002  | 0.0001  | 19.500 | 6.500    | 42.4987    | 6.7646    | dapB; dihydrodipicolinate reductase                  |                         |    |    |   |   |
|          |                        |                      |         |         | 16.500 | 8.500    | 38.7215    | 8.5000    |                                                      |                         |    |    |   |   |
| SGO_1118 | 1.378                  | 4.957                | 0.0183  | 0.0825  | 5.500  |          | 11.9868    |           | ABC transporter, ATP-binding protein SP1553          |                         |    |    |   |   |
|          |                        |                      |         |         | 6.000  | 5.000    | 14.0805    | 5.0000    |                                                      |                         |    |    |   |   |
| SGO_1120 | 1.559                  | 8.789                | 0.0013  | 0.0025  | 67.000 | 48.000   | 146.0213   | 49.9541   | guaA; GMP synthase                                   |                         |    |    |   |   |
|          |                        |                      |         |         | 78.500 | 62.000   | 184.2204   | 62.0000   |                                                      |                         |    |    |   |   |

- Show detected proteins only
- Show all proteins

Proteins found: 769

Filter by category:

ABC Transporter

Test

Cutoff

q-Value

.005

p-Value

|             | Signif | Direction | Applies To   |
|-------------|--------|-----------|--------------|
| Red         | yes    | +         | ratios, bars |
| Yellow      | no     | n/a       | bars         |
| Green       | yes    | -         | ratios, bars |
| Pink        | yes    | +         | p-, q-Values |
| Light Green | yes    | -         | p-, q-Values |

Dot Plots Dot Plots

Summary Table

SgFn vs Sg

SgPg vs Sg

SgPgFn vs Sg

SgPg vs SgFn

SgPgFn vs SgFn

SgPgFn vs SgPg

Coverage

| Protein  | SgFn vs Sg             |                      |         |         | Raw     |         | Normalized |          | Description                                                | Log <sub>2</sub> Ratios |    |    |   |   |
|----------|------------------------|----------------------|---------|---------|---------|---------|------------|----------|------------------------------------------------------------|-------------------------|----|----|---|---|
|          | Log <sub>2</sub> Ratio | Log <sub>2</sub> Sum | q-Value | p-Value | SgFn    | Sg      | SgFn       | Sg       |                                                            | -6                      | -4 | -2 | 0 | 2 |
| SGO_1123 | 0.954                  | 7.773                | 0.0005  | 0.0007  | 35.000  | 35.000  | 76.2798    | 36.4248  | ffh; signal recognition particle protein                   |                         |    |    |   |   |
|          |                        |                      |         |         | 29.000  | 38.000  | 68.0559    | 38.0000  |                                                            |                         |    |    |   |   |
| SGO_1129 | -0.262                 | 6.672                | 0.0032  | 0.0095  | 10.500  | 28.000  | 22.8839    | 29.1399  | lplA; lipoate protein ligase A                             |                         |    |    |   |   |
|          |                        |                      |         |         | 10.000  | 26.500  | 23.4676    | 26.5000  |                                                            |                         |    |    |   |   |
| SGO_1130 | -3.046                 | 7.970                | 0.0000  | 0.0000  | 5.500   | 109.000 | 11.9868    | 113.4373 | dihydrolipoamide dehydrogenase                             |                         |    |    |   |   |
|          |                        |                      |         |         | 6.500   | 110.000 | 15.2539    | 110.0000 |                                                            |                         |    |    |   |   |
| SGO_1131 | -2.627                 | 6.185                | 0.0028  | 0.0079  | 2.500   | 32.000  | 5.4486     | 33.3027  | sucB; dihydrolipoamide S-acetyltransferase                 |                         |    |    |   |   |
|          |                        |                      |         |         |         | 34.000  |            | 34.0000  |                                                            |                         |    |    |   |   |
| SGO_1133 | -0.959                 | 6.337                | 0.0317  | 0.1660  |         | 35.000  |            | 36.4248  | acoA; acetoin dehydrogenase                                |                         |    |    |   |   |
|          |                        |                      |         |         | 7.000   | 28.000  | 16.4273    | 28.0000  |                                                            |                         |    |    |   |   |
| SGO_1134 | 2.321                  | 6.119                | 0.0067  | 0.0238  | 9.000   | 4.500   | 19.6148    | 4.6832   | hypothetical protein SGO_1134                              |                         |    |    |   |   |
|          |                        |                      |         |         | 16.500  | 6.500   | 38.7215    | 6.5000   |                                                            |                         |    |    |   |   |
| SGO_1139 | 0.405                  | 6.420                | 0.0116  | 0.0478  | 11.500  | 15.000  | 25.0634    | 15.6106  | GTP-binding protein                                        |                         |    |    |   |   |
|          |                        |                      |         |         | 10.000  | 21.500  | 23.4676    | 21.5000  |                                                            |                         |    |    |   |   |
| SGO_1140 | 0.128                  | 8.431                | 0.0388  | 0.2102  | 39.000  | 85.500  | 84.9975    | 88.9807  | clpX; ATP-dependent Clp protease, ATP-binding subunit ClpX |                         |    |    |   |   |
|          |                        |                      |         |         | 40.500  | 76.000  | 95.0437    | 76.0000  |                                                            |                         |    |    |   |   |
| SGO_1141 | 2.133                  | 6.005                | 0.0060  | 0.0203  | 8.500   | 4.500   | 18.5251    | 4.6832   | folA; dihydrofolate reductase                              |                         |    |    |   |   |
|          |                        |                      |         |         | 14.500  | 7.000   | 34.0280    | 7.0000   |                                                            |                         |    |    |   |   |
| SGO_1143 | 0.391                  | 5.180                | 0.0534  | 0.3075  | 3.500   | 5.500   | 7.6280     | 5.7239   | thyA; thymidylate synthase                                 |                         |    |    |   |   |
|          |                        |                      |         |         | 5.500   | 10.000  | 12.9072    | 10.0000  |                                                            |                         |    |    |   |   |
| SGO_1144 | 2.268                  | 9.727                | 0.0002  | 0.0001  | 152.500 | 66.500  | 332.3619   | 69.2072  | glcK; glucokinase                                          |                         |    |    |   |   |
|          |                        |                      |         |         | 157.500 | 76.500  | 369.6142   | 76.5000  |                                                            |                         |    |    |   |   |
| SGO_1148 | -2.650                 | 8.527                | 0.0003  | 0.0003  | 12.500  | 164.000 | 27.2428    | 170.6764 | cshB; surface-associated protein CshB                      |                         |    |    |   |   |
|          |                        |                      |         |         | 10.000  | 147.500 | 23.4676    | 147.5000 |                                                            |                         |    |    |   |   |

- Show detected proteins only
- Show all proteins

Proteins found: 769

Filter by category:

ABC Transporter

Test

Cutoff

q-Value

.005

p-Value

|             | Signif | Direction | Applies To   |
|-------------|--------|-----------|--------------|
| Red         | yes    | +         | ratios, bars |
| Yellow      | no     | n/a       | bars         |
| Green       | yes    | -         | ratios, bars |
| Pink        | yes    | +         | p-, q-Values |
| Light Green | yes    | -         | p-, q-Values |

Dot Plots Dot Plots

Summary Table

SgFn vs Sg

SgPg vs Sg

SgPgFn vs Sg

SgPg vs SgFn

SgPgFn vs SgFn

SgPgFn vs SgPg

Coverage

SgFn vs Sg

Raw

Normalized

Log<sub>2</sub> Ratios

| Protein  | SgFn vs Sg             |                      |         |         | Raw     |         | Normalized |          | Description                             | Log <sub>2</sub> Ratios |    |    |   |   |   |
|----------|------------------------|----------------------|---------|---------|---------|---------|------------|----------|-----------------------------------------|-------------------------|----|----|---|---|---|
|          | Log <sub>2</sub> Ratio | Log <sub>2</sub> Sum | q-Value | p-Value | SgFn    | Sg      | SgFn       | Sg       |                                         | -6                      | -4 | -2 | 0 | 2 | 4 |
| SGO_1150 | 0.600                  | 4.826                | 0.0397  | 0.2158  | 5.500   |         | 11.9868    |          | hypothetical protein SGO_1150           |                         |    |    |   |   |   |
|          |                        |                      |         |         | 4.000   | 7.000   | 9.3870     | 7.0000   |                                         |                         |    |    |   |   |   |
| SGO_1151 | 2.287                  | 9.772                | 0.0000  | 0.0000  | 165.000 | 68.500  | 359.6046   | 71.2886  | glyA; serine hydroxymethyltransferase   |                         |    |    |   |   |   |
|          |                        |                      |         |         | 156.000 | 77.500  | 366.0941   | 77.5000  |                                         |                         |    |    |   |   |   |
| SGO_1154 | 0.128                  | 7.465                | 0.0957  | 0.6170  | 30.000  | 47.500  | 65.3827    | 49.4337  | prfA; peptide chain release factor 1    |                         |    |    |   |   |   |
|          |                        |                      |         |         | 12.500  | 32.500  | 29.3345    | 32.5000  |                                         |                         |    |    |   |   |   |
| SGO_1155 | -1.087                 | 5.504                | 0.0219  | 0.1031  | 4.500   | 9.500   | 9.8074     | 9.8867   | tdk; thymidine kinase                   |                         |    |    |   |   |   |
|          |                        |                      |         |         | 2.000   | 21.000  | 4.6935     | 21.0000  |                                         |                         |    |    |   |   |   |
| SGO_1159 | 2.423                  | 4.557                | 0.0157  | 0.0696  | 4.500   |         | 9.8074     |          | guaC; guanosine monophosphate reductase |                         |    |    |   |   |   |
|          |                        |                      |         |         | 5.000   | 2.000   | 11.7338    | 2.0000   |                                         |                         |    |    |   |   |   |
| SGO_1167 | -1.132                 | 7.433                | 0.0004  | 0.0005  | 13.000  | 54.000  | 28.3325    | 56.1983  | nox; NADH oxidase                       |                         |    |    |   |   |   |
|          |                        |                      |         |         | 11.000  | 62.500  | 25.8143    | 62.5000  |                                         |                         |    |    |   |   |   |
| SGO_1169 | -0.745                 | 6.887                | 0.0056  | 0.0186  | 12.500  | 37.500  | 27.2428    | 39.0266  | NADPH-dependent FMN reductase           |                         |    |    |   |   |   |
|          |                        |                      |         |         | 7.500   | 34.500  | 17.6007    | 34.5000  |                                         |                         |    |    |   |   |   |
| SGO_1170 | -2.073                 | 8.329                | 0.0001  | 0.0000  | 15.500  | 125.500 | 33.7810    | 130.6091 | NADPH-dependent FMN reductase           |                         |    |    |   |   |   |
|          |                        |                      |         |         | 12.000  | 129.000 | 28.1611    | 129.0000 |                                         |                         |    |    |   |   |   |
| SGO_1171 | -3.650                 | 7.609                | 0.0001  | 0.0001  | 5.000   | 89.000  | 10.8971    | 92.6232  | thioredoxin family protein              |                         |    |    |   |   |   |
|          |                        |                      |         |         | 2.000   | 87.000  | 4.6935     | 87.0000  |                                         |                         |    |    |   |   |   |
| SGO_1185 | -0.148                 | 4.148                | 0.1009  | 0.6525  | 2.500   | 7.000   | 5.4486     | 7.2850   | acetyltransferase, GNAT family          |                         |    |    |   |   |   |
|          |                        |                      |         |         |         | 5.000   |            | 5.0000   |                                         |                         |    |    |   |   |   |
| SGO_1189 | -2.586                 | 9.364                | 0.0003  | 0.0004  | 20.000  | 292.500 | 43.5884    | 304.4076 | lipoprotein, putative                   |                         |    |    |   |   |   |
|          |                        |                      |         |         | 21.500  | 260.500 | 50.4553    | 260.5000 |                                         |                         |    |    |   |   |   |
| SGO_1191 | -1.030                 | 11.163               | 0.0007  | 0.0010  | 178.000 | 789.500 | 387.9371   | 821.6402 | rpL; ribosomal protein L7/L12           |                         |    |    |   |   |   |
|          |                        |                      |         |         | 155.500 | 718.000 | 364.9207   | 718.0000 |                                         |                         |    |    |   |   |   |

- Show detected proteins only  
 Show all proteins

Proteins found:  
769

Filter by category:

ABC Transporter

Test

Cutoff

q-Value

.005

p-Value

|             | Signif | Direction | Applies To   |
|-------------|--------|-----------|--------------|
| Red         | yes    | +         | ratios, bars |
| Yellow      | no     | n/a       | bars         |
| Green       | yes    | -         | ratios, bars |
| Pink        | yes    | +         | p-, q-Values |
| Light Green | yes    | -         | p-, q-Values |

Dot Plots Dot Plots

Summary Table

SgFn vs Sg

SgPg vs Sg

SgPgFn vs Sg

SgPg vs SgFn

SgPgFn vs SgFn

SgPgFn vs SgPg

Coverage

SgFn vs Sg

Raw

Normalized

Log<sub>2</sub> Ratios

| Protein  | SgFn vs Sg             |                      |         |         | Raw     |         | Normalized |          | Description                                           | Log <sub>2</sub> Ratios |    |    |   |   |
|----------|------------------------|----------------------|---------|---------|---------|---------|------------|----------|-------------------------------------------------------|-------------------------|----|----|---|---|
|          | Log <sub>2</sub> Ratio | Log <sub>2</sub> Sum | q-Value | p-Value | SgFn    | Sg      | SgFn       | Sg       |                                                       | -6                      | -4 | -2 | 0 | 2 |
| SGO_1192 | -0.243                 | 9.189                | 0.0417  | 0.2316  | 50.500  | 144.500 | 110.0608   | 150.3825 | BL5; 50S ribosomal protein L10                        |                         |    |    |   |   |
|          |                        |                      |         |         | 68.000  | 163.500 | 159.5795   | 163.5000 |                                                       |                         |    |    |   |   |
| SGO_1193 | 1.446                  | 6.759                | 0.0004  | 0.0005  | 17.000  | 13.500  | 37.0502    | 14.0496  | gid; Glucose inhibited division protein A             |                         |    |    |   |   |
|          |                        |                      |         |         | 18.000  | 15.000  | 42.2416    | 15.0000  |                                                       |                         |    |    |   |   |
| SGO_1197 | -1.919                 | 7.885                | 0.0011  | 0.0021  | 9.000   | 79.500  | 19.6148    | 82.7364  | topA; DNA topoisomerase I                             |                         |    |    |   |   |
|          |                        |                      |         |         | 13.000  | 103.500 | 30.5078    | 103.5000 |                                                       |                         |    |    |   |   |
| SGO_1202 | 0.838                  | 5.772                | 0.0078  | 0.0290  | 6.500   | 9.000   | 14.1662    | 9.3664   | GTP-binding protein                                   |                         |    |    |   |   |
|          |                        |                      |         |         | 9.000   | 10.000  | 21.1208    | 10.0000  |                                                       |                         |    |    |   |   |
| SGO_1203 | 1.365                  | 7.031                | 0.0011  | 0.0022  | 19.500  | 15.500  | 42.4987    | 16.1310  | anaerobic ribonucleotide reductase                    |                         |    |    |   |   |
|          |                        |                      |         |         | 22.000  | 20.500  | 51.6287    | 20.5000  |                                                       |                         |    |    |   |   |
| SGO_1205 | 1.087                  | 5.095                | 0.0245  | 0.1182  | 7.500   | 7.000   | 16.3457    | 7.2850   | dapA; dihydrodipicolinate synthase                    |                         |    |    |   |   |
|          |                        |                      |         |         | 3.000   | 3.500   | 7.0403     | 3.5000   |                                                       |                         |    |    |   |   |
| SGO_1206 | 0.207                  | 7.665                | 0.0140  | 0.0604  | 23.500  | 42.500  | 51.2164    | 44.2302  | asd; aspartate-semialdehyde dehydrogenase             |                         |    |    |   |   |
|          |                        |                      |         |         | 24.500  | 50.000  | 57.4955    | 50.0000  |                                                       |                         |    |    |   |   |
| SGO_1210 | 1.322                  | 6.338                | 0.0019  | 0.0045  | 11.500  | 11.500  | 25.0634    | 11.9682  | fhs-1; formate--tetrahydrofolate ligase               |                         |    |    |   |   |
|          |                        |                      |         |         | 14.000  | 11.000  | 32.8546    | 11.0000  |                                                       |                         |    |    |   |   |
| SGO_1213 | -1.696                 | 5.911                | 0.0075  | 0.0273  | 4.500   | 16.000  | 9.8074     | 16.6514  | coaC; phosphopantothenoylcysteine decarboxylase       |                         |    |    |   |   |
|          |                        |                      |         |         | 2.000   | 29.000  | 4.6935     | 29.0000  |                                                       |                         |    |    |   |   |
| SGO_1215 | 0.991                  | 10.269               | 0.0005  | 0.0007  | 178.000 | 190.000 | 387.9371   | 197.7348 | manB; phosphomannomutase                              |                         |    |    |   |   |
|          |                        |                      |         |         | 184.500 | 215.000 | 432.9766   | 215.0000 |                                                       |                         |    |    |   |   |
| SGO_1216 | 1.372                  | 6.913                | 0.0009  | 0.0017  | 21.500  | 18.500  | 46.8576    | 19.2531  | bta; Possible bacteriocin transport accessory protein |                         |    |    |   |   |
|          |                        |                      |         |         | 17.000  | 14.500  | 39.8949    | 14.5000  |                                                       |                         |    |    |   |   |
| SGO_1219 | 0.989                  | 8.278                | 0.0179  | 0.0802  | 31.500  | 44.000  | 68.6518    | 45.7912  | pta; phosphate acetyltransferase                      |                         |    |    |   |   |
|          |                        |                      |         |         | 60.500  | 54.000  | 141.9788   | 54.0000  |                                                       |                         |    |    |   |   |

- Show detected proteins only  
 Show all proteins

Proteins found:  
769

Filter by category:

ABC Transporter

Test

Cutoff

q-Value

.005

p-Value

|             | Signif | Direction | Applies To   |
|-------------|--------|-----------|--------------|
| Red         | yes    | +         | ratios, bars |
| Yellow      | no     | n/a       | bars         |
| Green       | yes    | -         | ratios, bars |
| Pink        | yes    | +         | p-, q-Values |
| Light Green | yes    | -         | p-, q-Values |

Dot Plots Dot Plots

Summary Table

SgFn vs Sg

SgPg vs Sg

SgPgFn vs Sg

SgPg vs SgFn

SgPgFn vs SgFn

SgPgFn vs SgPg

Coverage

SgFn vs Sg

Raw

Normalized

Log<sub>2</sub> Ratios

| Protein  | SgFn vs Sg             |                      |         |         | Raw     |         | Normalized |          | Description                                           | Log <sub>2</sub> Ratios |    |    |   |   |   |   |
|----------|------------------------|----------------------|---------|---------|---------|---------|------------|----------|-------------------------------------------------------|-------------------------|----|----|---|---|---|---|
|          | Log <sub>2</sub> Ratio | Log <sub>2</sub> Sum | q-Value | p-Value | SgFn    | Sg      | SgFn       | Sg       |                                                       | -6                      | -4 | -2 | 0 | 2 | 4 | 6 |
| SGO_1221 | -2.962                 | 7.363                | 0.0009  | 0.0017  | 2.000   | 62.000  | 4.3588     | 64.5240  | ppnK; Probable inorganic polyphosphate/ATP-NAD kinase |                         |    |    |   |   |   |   |
|          |                        |                      |         |         | 8.000   | 77.000  | 18.7741    | 77.0000  |                                                       |                         |    |    |   |   |   |   |
| SGO_1222 | -1.021                 | 4.154                | 0.0070  | 0.0250  |         | 7.000   |            | 7.2850   | GTP pyrophosphokinase-like protein                    |                         |    |    |   |   |   |   |
|          |                        |                      |         |         | 1.500   | 7.000   | 3.5201     | 7.0000   |                                                       |                         |    |    |   |   |   |   |
| SGO_1224 | -0.808                 | 8.161                | 0.0001  | 0.0001  | 23.500  | 89.500  | 51.2164    | 93.1435  | Ribose-phosphate pyrophosphokinase 2                  |                         |    |    |   |   |   |   |
|          |                        |                      |         |         | 22.500  | 89.000  | 52.8020    | 89.0000  |                                                       |                         |    |    |   |   |   |   |
| SGO_1225 | 0.444                  | 5.289                | 0.0259  | 0.1290  | 4.000   | 7.500   | 8.7177     | 7.8053   | pyridoxal-phosphate dependent aminotransferase        |                         |    |    |   |   |   |   |
|          |                        |                      |         |         | 6.000   | 8.500   | 14.0805    | 8.5000   |                                                       |                         |    |    |   |   |   |   |
| SGO_1226 | 0.554                  | 6.560                | 0.0306  | 0.1599  | 10.000  | 13.500  | 21.7942    | 14.0496  | hypothetical protein SGO_1226                         |                         |    |    |   |   |   |   |
|          |                        |                      |         |         | 14.500  | 24.500  | 34.0280    | 24.5000  |                                                       |                         |    |    |   |   |   |   |
| SGO_1228 | 1.028                  | 5.079                | 0.0021  | 0.0053  | 5.500   | 6.500   | 11.9868    | 6.7646   | DNA-binding protein BH0551                            |                         |    |    |   |   |   |   |
|          |                        |                      |         |         | 4.500   | 4.500   | 10.5604    | 4.5000   |                                                       |                         |    |    |   |   |   |   |
| SGO_1231 | -0.634                 | 8.407                | 0.0061  | 0.0209  | 35.500  | 90.000  | 77.3695    | 93.6639  | gyrA; DNA gyrase, A subunit                           |                         |    |    |   |   |   |   |
|          |                        |                      |         |         | 24.000  | 112.000 | 56.3222    | 112.0000 |                                                       |                         |    |    |   |   |   |   |
| SGO_1232 | 2.961                  | 10.386               | 0.0001  | 0.0000  | 277.000 | 65.000  | 603.6999   | 67.6461  | L-lactate dehydrogenase                               |                         |    |    |   |   |   |   |
|          |                        |                      |         |         | 247.500 | 85.500  | 580.8223   | 85.5000  |                                                       |                         |    |    |   |   |   |   |
| SGO_1234 | -0.416                 | 10.488               | 0.0136  | 0.0581  | 163.000 | 359.500 | 355.2458   | 374.1351 | rpsA; 30S ribosomal protein S1                        |                         |    |    |   |   |   |   |
|          |                        |                      |         |         | 112.000 | 444.000 | 262.8368   | 444.0000 |                                                       |                         |    |    |   |   |   |   |
| SGO_1238 | 1.196                  | 7.844                | 0.0074  | 0.0267  | 46.000  | 35.000  | 100.2534   | 36.4248  | ilvE; branched-chain amino acid aminotransferase      |                         |    |    |   |   |   |   |
|          |                        |                      |         |         | 26.000  | 32.000  | 61.0157    | 32.0000  |                                                       |                         |    |    |   |   |   |   |
| SGO_1239 | -2.435                 | 6.547                | 0.0006  | 0.0010  | 2.000   | 35.500  | 4.3588     | 36.9452  | parC; DNA topoisomerase IV, A subunit                 |                         |    |    |   |   |   |   |
|          |                        |                      |         |         | 5.000   | 40.500  | 11.7338    | 40.5000  |                                                       |                         |    |    |   |   |   |   |
| SGO_1247 | -1.887                 | 9.490                | 0.0001  | 0.0000  | 37.500  | 267.500 | 81.7283    | 278.3898 | 5'-nucleotidase family protein                        |                         |    |    |   |   |   |   |
|          |                        |                      |         |         | 30.500  | 287.500 | 71.5761    | 287.5000 |                                                       |                         |    |    |   |   |   |   |

- Show detected proteins only  
 Show all proteins

Proteins found:  
769

Filter by category:

ABC Transporter

Test

Cutoff

q-Value

.005

p-Value

|             | Signif | Direction | Applies To   |
|-------------|--------|-----------|--------------|
| Red         | yes    | +         | ratios, bars |
| Yellow      | no     | n/a       | bars         |
| Green       | yes    | -         | ratios, bars |
| Pink        | yes    | +         | p-, q-Values |
| Light Green | yes    | -         | p-, q-Values |

Dot Plots Dot Plots

Summary Table

SgFn vs Sg

SgPg vs Sg

SgPgFn vs Sg

SgPg vs SgFn

SgPgFn vs SgFn

SgPgFn vs SgPg

Coverage

SgFn vs Sg

Raw

Normalized

Log<sub>2</sub> Ratios

| Protein  | SgFn vs Sg             |                      |         |         | Raw     |         | Normalized |          | Description                                                       | Log <sub>2</sub> Ratios |    |    |   |   |   |   |
|----------|------------------------|----------------------|---------|---------|---------|---------|------------|----------|-------------------------------------------------------------------|-------------------------|----|----|---|---|---|---|
|          | Log <sub>2</sub> Ratio | Log <sub>2</sub> Sum | q-Value | p-Value | SgFn    | Sg      | SgFn       | Sg       |                                                                   | -6                      | -4 | -2 | 0 | 2 | 4 | 6 |
| SGO_1248 | 1.629                  | 6.962                | 0.0102  | 0.0400  | 14.500  | 17.500  | 31.6016    | 18.2124  | pyrC; dihydroorotase                                              |                         |    |    |   |   |   |   |
|          |                        |                      |         |         | 27.000  | 11.500  | 63.3624    | 11.5000  |                                                                   |                         |    |    |   |   |   |   |
| SGO_1250 | 0.002                  | 5.377                | 0.1241  | 0.8174  | 5.000   | 7.000   | 10.8971    | 7.2850   | ung; uracil-DNA glycosylase                                       |                         |    |    |   |   |   |   |
|          |                        |                      |         |         | 4.000   | 14.000  | 9.3870     | 14.0000  |                                                                   |                         |    |    |   |   |   |   |
| SGO_1253 | -0.416                 | 6.262                | 0.0462  | 0.2609  | 10.000  | 17.500  | 21.7942    | 18.2124  | pyrE; orotate phosphoribosyltransferase                           |                         |    |    |   |   |   |   |
|          |                        |                      |         |         | 5.000   | 25.000  | 11.7338    | 25.0000  |                                                                   |                         |    |    |   |   |   |   |
| SGO_1257 | 1.286                  | 5.778                | 0.0098  | 0.0384  | 11.500  | 6.000   | 25.0634    | 6.2443   | probable transcriptional regulator (LysR family)                  |                         |    |    |   |   |   |   |
|          |                        |                      |         |         | 6.000   | 9.500   | 14.0805    | 9.5000   |                                                                   |                         |    |    |   |   |   |   |
| SGO_1258 | -0.144                 | 4.608                | 0.0885  | 0.5643  | 3.000   | 4.000   | 6.5383     | 4.1628   | NAD-dependent deacetylase (Regulatory protein SIR2-like protein)  |                         |    |    |   |   |   |   |
|          |                        |                      |         |         | 2.000   | 9.000   | 4.6935     | 9.0000   |                                                                   |                         |    |    |   |   |   |   |
| SGO_1260 | -0.908                 | 7.764                | 0.0001  | 0.0001  | 18.000  | 69.000  | 39.2296    | 71.8090  | deoD; purine nucleoside phosphorylase                             |                         |    |    |   |   |   |   |
|          |                        |                      |         |         | 15.500  | 70.000  | 36.3747    | 70.0000  |                                                                   |                         |    |    |   |   |   |   |
| SGO_1263 | -1.173                 | 8.218                | 0.0007  | 0.0011  | 22.000  | 106.500 | 47.9473    | 110.8356 | purine nucleoside phosphorylase I, inosine and guanosine-specific |                         |    |    |   |   |   |   |
|          |                        |                      |         |         | 18.500  | 95.500  | 43.4150    | 95.5000  |                                                                   |                         |    |    |   |   |   |   |
| SGO_1264 | 0.143                  | 10.075               | 0.0658  | 0.3970  | 149.500 | 220.000 | 325.8236   | 228.9561 | deoB; phosphopentomutase                                          |                         |    |    |   |   |   |   |
|          |                        |                      |         |         | 103.000 | 282.000 | 241.7160   | 282.0000 |                                                                   |                         |    |    |   |   |   |   |
| SGO_1265 | -0.125                 | 7.240                | 0.0847  | 0.5356  | 15.500  | 26.000  | 33.7810    | 27.0585  | rpiA; ribose 5-phosphate isomerase                                |                         |    |    |   |   |   |   |
|          |                        |                      |         |         | 15.500  | 54.000  | 36.3747    | 54.0000  |                                                                   |                         |    |    |   |   |   |   |
| SGO_1266 | 0.968                  | 6.266                | 0.0005  | 0.0007  | 11.000  | 12.500  | 23.9736    | 13.0089  | trmE; tRNA modification GTPase TrmE                               |                         |    |    |   |   |   |   |
|          |                        |                      |         |         | 11.500  | 13.000  | 26.9877    | 13.0000  |                                                                   |                         |    |    |   |   |   |   |
| SGO_1273 | 0.309                  | 7.412                | 0.0431  | 0.2413  | 27.000  | 40.000  | 58.8444    | 41.6284  | rpoD; RNA polymerase sigma factor                                 |                         |    |    |   |   |   |   |
|          |                        |                      |         |         | 15.500  | 33.500  | 36.3747    | 33.5000  |                                                                   |                         |    |    |   |   |   |   |
| SGO_1276 | -1.596                 | 7.134                | 0.0001  | 0.0000  | 8.500   | 49.500  | 18.5251    | 51.5151  | rpsU; ribosomal protein S21                                       |                         |    |    |   |   |   |   |
|          |                        |                      |         |         | 7.000   | 54.000  | 16.4273    | 54.0000  |                                                                   |                         |    |    |   |   |   |   |

- Show detected proteins only  
 Show all proteins

Proteins found:  
769

Filter by category:

ABC Transporter

Test

Cutoff

q-Value

.005

p-Value

|             | Signif | Direction | Applies To   |
|-------------|--------|-----------|--------------|
| Red         | yes    | +         | ratios, bars |
| Yellow      | no     | n/a       | bars         |
| Green       | yes    | -         | ratios, bars |
| Pink        | yes    | +         | p-, q-Values |
| Light Green | yes    | -         | p-, q-Values |

Dot Plots Dot Plots



Summary Table

SgFn vs Sg

SgPg vs Sg

SgPgFn vs Sg

SgPg vs SgFn

SgPgFn vs SgFn

SgPgFn vs SgPg

Coverage

SgFn vs Sg

Raw

Normalized

Log<sub>2</sub> Ratios

| Protein  | SgFn vs Sg             |                      |         |         | Raw    |        | Normalized |         | Description                                        | Log <sub>2</sub> Ratios |    |    |   |   |   |   |
|----------|------------------------|----------------------|---------|---------|--------|--------|------------|---------|----------------------------------------------------|-------------------------|----|----|---|---|---|---|
|          | Log <sub>2</sub> Ratio | Log <sub>2</sub> Sum | q-Value | p-Value | SgFn   | Sg     | SgFn       | Sg      |                                                    | -6                      | -4 | -2 | 0 | 2 | 4 | 6 |
| SGO_1281 | -0.896                 | 4.066                | 0.0337  | 0.1781  |        | 5.500  |            | 5.7239  | penicillinase repressor, putative                  |                         |    |    |   |   |   |   |
|          |                        |                      |         |         | 1.500  | 7.500  | 3.5201     | 7.5000  |                                                    |                         |    |    |   |   |   |   |
| SGO_1283 | -0.373                 | 7.916                | 0.0112  | 0.0452  | 27.500 | 68.500 | 59.9341    | 71.2886 | oxidoreductase                                     |                         |    |    |   |   |   |   |
|          |                        |                      |         |         | 19.500 | 64.500 | 45.7618    | 64.5000 |                                                    |                         |    |    |   |   |   |   |
| SGO_1284 | -0.375                 | 5.791                | 0.0754  | 0.4661  | 3.500  | 15.500 | 7.6280     | 16.1310 | thioredoxin-disulfide reductase                    |                         |    |    |   |   |   |   |
|          |                        |                      |         |         | 7.500  | 14.000 | 17.6007    | 14.0000 |                                                    |                         |    |    |   |   |   |   |
| SGO_1293 | 0.127                  | 7.656                | 0.0294  | 0.1508  | 22.500 | 44.500 | 49.0370    | 46.3116 | asnS; asparaginyl-tRNA synthetase                  |                         |    |    |   |   |   |   |
|          |                        |                      |         |         | 24.000 | 50.000 | 56.3222    | 50.0000 |                                                    |                         |    |    |   |   |   |   |
| SGO_1297 | 2.252                  | 7.245                | 0.0019  | 0.0046  | 34.000 | 12.000 | 74.1003    | 12.4885 | aspC; aspartate aminotransferase                   |                         |    |    |   |   |   |   |
|          |                        |                      |         |         | 22.000 | 13.500 | 51.6287    | 13.5000 |                                                    |                         |    |    |   |   |   |   |
| SGO_1312 | 3.698                  | 7.531                | 0.0000  | 0.0000  | 40.000 | 7.000  | 87.1769    | 7.2850  | pepT; peptidase T                                  |                         |    |    |   |   |   |   |
|          |                        |                      |         |         | 36.000 | 6.000  | 84.4832    | 6.0000  |                                                    |                         |    |    |   |   |   |   |
| SGO_1315 | 1.317                  | 3.611                |         |         | 4.000  |        | 8.7177     |         | trmD; tRNA (guanine-N1)-methyltransferase          |                         |    |    |   |   |   |   |
|          |                        |                      |         |         |        | 3.500  |            | 3.5000  |                                                    |                         |    |    |   |   |   |   |
| SGO_1316 | -0.094                 | 4.561                | 0.0829  | 0.5220  | 2.500  | 7.000  | 5.4486     | 7.2850  | 16S rRNA processing protein RimM                   |                         |    |    |   |   |   |   |
|          |                        |                      |         |         | 2.500  | 5.000  | 5.8669     | 5.0000  |                                                    |                         |    |    |   |   |   |   |
| SGO_1323 | -0.001                 | 7.305                | 0.1420  | 0.9590  | 19.500 | 42.500 | 42.4987    | 44.2302 | rpsP; ribosomal protein S16                        |                         |    |    |   |   |   |   |
|          |                        |                      |         |         | 15.500 | 35.000 | 36.3747    | 35.0000 |                                                    |                         |    |    |   |   |   |   |
| SGO_1327 | -0.272                 | 5.984                | 0.0425  | 0.2370  | 6.500  | 13.000 | 14.1662    | 13.5292 | HAD-superfamily subfamily IIA hydrolase, TIGR01457 |                         |    |    |   |   |   |   |
|          |                        |                      |         |         | 6.000  | 21.500 | 14.0805    | 21.5000 |                                                    |                         |    |    |   |   |   |   |
| SGO_1336 | 0.376                  | 6.355                | 0.0261  | 0.1308  | 8.500  | 17.000 | 18.5251    | 17.6921 | pcrA; ATP-dependent DNA helicase PcrA              |                         |    |    |   |   |   |   |
|          |                        |                      |         |         | 12.000 | 17.500 | 28.1611    | 17.5000 |                                                    |                         |    |    |   |   |   |   |
| SGO_1338 | -0.729                 | 6.239                | 0.0050  | 0.0161  | 6.500  | 19.500 | 14.1662    | 20.2938 | Signal peptidase I                                 |                         |    |    |   |   |   |   |
|          |                        |                      |         |         | 6.000  | 27.000 | 14.0805    | 27.0000 |                                                    |                         |    |    |   |   |   |   |

- Show detected proteins only  
 Show all proteins

Proteins found:  
769

Filter by category:

ABC Transporter

Test

Cutoff

q-Value

.005

p-Value

|             | Signif | Direction | Applies To                |
|-------------|--------|-----------|---------------------------|
| Red         | yes    | +         | ratios, bars              |
| Yellow      | no     | n/a       | bars                      |
| Green       | yes    | -         | ratios, bars              |
| Pink        | yes    | +         | p <sup>-</sup> , q-Values |
| Light Green | yes    | -         | p <sup>-</sup> , q-Values |

Dot Plots Dot Plots

Summary Table

SgFn vs Sg

SgPg vs Sg

SgPgFn vs Sg

SgPg vs SgFn

SgPgFn vs SgFn

SgPgFn vs SgPg

Coverage

SgFn vs Sg

Raw

Normalized

Log<sub>2</sub> Ratios

| Protein  | SgFn vs Sg             |                      |         |         | Raw     |         | Normalized |          | Description                                         | Log <sub>2</sub> Ratios |    |    |   |   |   |   |
|----------|------------------------|----------------------|---------|---------|---------|---------|------------|----------|-----------------------------------------------------|-------------------------|----|----|---|---|---|---|
|          | Log <sub>2</sub> Ratio | Log <sub>2</sub> Sum | q-Value | p-Value | SgFn    | Sg      | SgFn       | Sg       |                                                     | -6                      | -4 | -2 | 0 | 2 | 4 | 6 |
| SGO_1339 | 0.635                  | 11.550               | 0.0014  | 0.0030  | 447.500 | 551.000 | 975.2913   | 573.4310 | pyk; pyruvate kinase                                |                         |    |    |   |   |   |   |
|          |                        |                      |         |         | 362.500 | 600.000 | 850.6994   | 600.0000 |                                                     |                         |    |    |   |   |   |   |
| SGO_1340 | 1.240                  | 10.517               | 0.0002  | 0.0001  | 227.000 | 213.500 | 494.7288   | 222.1915 | Phosphofructokinase                                 |                         |    |    |   |   |   |   |
|          |                        |                      |         |         | 228.000 | 213.500 | 535.0606   | 213.5000 |                                                     |                         |    |    |   |   |   |   |
| SGO_1341 | 0.393                  | 5.498                | 0.0437  | 0.2450  | 4.000   | 9.500   | 8.7177     | 9.8867   | dnaE; DNA-directed DNA polymerase III alpha chain   |                         |    |    |   |   |   |   |
|          |                        |                      |         |         | 7.500   | 9.000   | 17.6007    | 9.0000   |                                                     |                         |    |    |   |   |   |   |
| SGO_1342 | -0.526                 | 10.529               | 0.0026  | 0.0071  | 155.000 | 423.500 | 337.8104   | 440.7405 | ABC transporter, ATP-binding protein SP1715         |                         |    |    |   |   |   |   |
|          |                        |                      |         |         | 115.000 | 429.000 | 269.8770   | 429.0000 |                                                     |                         |    |    |   |   |   |   |
| SGO_1347 | -3.010                 | 6.238                | 0.0236  | 0.1122  | 2.000   | 39.500  | 4.3588     | 41.1080  | membrane associated lipoprotein                     |                         |    |    |   |   |   |   |
|          |                        |                      |         |         |         | 30.000  |            | 30.0000  |                                                     |                         |    |    |   |   |   |   |
| SGO_1355 | 0.352                  | 4.188                | 0.0603  | 0.3566  |         | 4.500   |            | 4.6832   | lipoprotein, putative                               |                         |    |    |   |   |   |   |
|          |                        |                      |         |         | 3.000   | 6.500   | 7.0403     | 6.5000   |                                                     |                         |    |    |   |   |   |   |
| SGO_1361 | -0.470                 | 3.485                |         |         |         |         |            |          | ADP-ribosylhydrolase                                |                         |    |    |   |   |   |   |
|          |                        |                      |         |         | 2.000   | 6.500   | 4.6935     | 6.5000   |                                                     |                         |    |    |   |   |   |   |
| SGO_1364 | -0.705                 | 6.491                | 0.0080  | 0.0301  | 7.000   | 22.500  | 15.2560    | 23.4160  | rumA-2; 23S rRNA (uracil-5-)-methyltransferase Ruma |                         |    |    |   |   |   |   |
|          |                        |                      |         |         | 8.000   | 32.500  | 18.7741    | 32.5000  |                                                     |                         |    |    |   |   |   |   |
| SGO_1365 | -0.327                 | 6.965                | 0.0064  | 0.0221  | 11.500  | 33.500  | 25.0634    | 34.8638  | transcription regulator yrfE                        |                         |    |    |   |   |   |   |
|          |                        |                      |         |         | 13.000  | 34.500  | 30.5078    | 34.5000  |                                                     |                         |    |    |   |   |   |   |
| SGO_1367 | 1.206                  | 5.508                | 0.0015  | 0.0034  | 6.500   | 6.000   | 14.1662    | 6.2443   | aroK; shikimate kinase                              |                         |    |    |   |   |   |   |
|          |                        |                      |         |         | 7.500   | 7.500   | 17.6007    | 7.5000   |                                                     |                         |    |    |   |   |   |   |
| SGO_1368 | 2.491                  | 5.517                | 0.0015  | 0.0034  | 9.000   | 1.500   | 19.6148    | 1.5611   | aroA; 3-phosphoshikimate 1-carboxyvinyltransferase  |                         |    |    |   |   |   |   |
|          |                        |                      |         |         | 7.500   | 7.000   | 17.6007    | 7.0000   |                                                     |                         |    |    |   |   |   |   |
| SGO_1369 | 3.346                  | 8.392                | 0.0001  | 0.0000  | 72.500  | 14.000  | 158.0081   | 14.5699  | L-2-hydroxyisocaproate dehydrogenase                |                         |    |    |   |   |   |   |
|          |                        |                      |         |         | 63.000  | 15.500  | 147.8457   | 15.5000  |                                                     |                         |    |    |   |   |   |   |

- Show detected proteins only  
 Show all proteins

Proteins found:  
769

Filter by category:

ABC Transporter

Test

Cutoff

q-Value

.005

p-Value

|             | Signif | Direction | Applies To   |
|-------------|--------|-----------|--------------|
| Red         | yes    | +         | ratios, bars |
| Yellow      | no     | n/a       | bars         |
| Green       | yes    | -         | ratios, bars |
| Pink        | yes    | +         | p-, q-Values |
| Light Green | yes    | -         | p-, q-Values |

Dot Plots Dot Plots

Summary Table

SgFn vs Sg

SgPg vs Sg

SgPgFn vs Sg

SgPg vs SgFn

SgPgFn vs SgFn

SgPgFn vs SgPg

Coverage

| Protein  | SgFn vs Sg             |                      |         |         | Raw    |         | Normalized |          | Description                                      | Log <sub>2</sub> Ratios |    |    |   |   |   |   |
|----------|------------------------|----------------------|---------|---------|--------|---------|------------|----------|--------------------------------------------------|-------------------------|----|----|---|---|---|---|
|          | Log <sub>2</sub> Ratio | Log <sub>2</sub> Sum | q-Value | p-Value | SgFn   | Sg      | SgFn       | Sg       |                                                  | -6                      | -4 | -2 | 0 | 2 | 4 | 6 |
| SGO_1370 | 1.319                  | 6.800                | 0.0022  | 0.0058  | 21.000 | 15.500  | 45.7679    | 16.1310  | Protein of unknown function (DUF964) superfamily |                         |    |    |   |   |   |   |
|          |                        |                      |         |         | 14.500 | 15.500  | 34.0280    | 15.5000  |                                                  |                         |    |    |   |   |   |   |
| SGO_1372 | 0.153                  | 4.305                | 0.0774  | 0.4805  |        | 5.500   |            | 5.7239   | aroC; chorismate synthase                        |                         |    |    |   |   |   |   |
|          |                        |                      |         |         | 3.000  | 7.000   | 7.0403     | 7.0000   |                                                  |                         |    |    |   |   |   |   |
| SGO_1373 | 0.481                  | 4.716                | 0.0699  | 0.4266  |        | 5.500   |            | 5.7239   | aroB; 3-dehydroquinase synthase                  |                         |    |    |   |   |   |   |
|          |                        |                      |         |         | 4.500  | 10.000  | 10.5604    | 10.0000  |                                                  |                         |    |    |   |   |   |   |
| SGO_1375 | -0.075                 | 5.682                | 0.0821  | 0.5164  | 5.500  | 11.000  | 11.9868    | 11.4478  | aroD; 3-dehydroquinase dehydratase, type I       |                         |    |    |   |   |   |   |
|          |                        |                      |         |         | 5.500  | 15.000  | 12.9072    | 15.0000  |                                                  |                         |    |    |   |   |   |   |
| SGO_1377 | -1.512                 | 8.293                | 0.0003  | 0.0003  | 19.000 | 105.000 | 41.4090    | 109.2745 | sulfatase                                        |                         |    |    |   |   |   |   |
|          |                        |                      |         |         | 17.000 | 123.000 | 39.8949    | 123.0000 |                                                  |                         |    |    |   |   |   |   |
| SGO_1381 | 0.018                  | 6.733                | 0.1240  | 0.8153  | 14.500 | 24.000  | 31.6016    | 24.9770  | csn1; CRISPR-associated protein, Csn1 family     |                         |    |    |   |   |   |   |
|          |                        |                      |         |         | 9.500  | 27.500  | 22.2942    | 27.5000  |                                                  |                         |    |    |   |   |   |   |
| SGO_1383 | 0.097                  | 8.709                | 0.0639  | 0.3823  | 44.500 | 91.500  | 96.9843    | 95.2249  | rplS; ribosomal protein L19                      |                         |    |    |   |   |   |   |
|          |                        |                      |         |         | 51.000 | 106.500 | 119.6846   | 106.5000 |                                                  |                         |    |    |   |   |   |   |
| SGO_1386 | 3.748                  | 6.408                | 0.0246  | 0.1188  | 15.500 |         | 33.7810    |          | chorismate mutase                                |                         |    |    |   |   |   |   |
|          |                        |                      |         |         | 20.500 | 3.000   | 48.1085    | 3.0000   |                                                  |                         |    |    |   |   |   |   |
| SGO_1388 | -0.919                 | 5.475                | 0.0302  | 0.1570  | 2.000  | 9.500   | 4.3588     | 9.8867   | pula-1; pullulanase, type I                      |                         |    |    |   |   |   |   |
|          |                        |                      |         |         | 5.000  | 18.500  | 11.7338    | 18.5000  |                                                  |                         |    |    |   |   |   |   |
| SGO_1389 | -0.596                 | 6.153                | 0.0095  | 0.0368  | 5.500  | 18.000  | 11.9868    | 18.7328  | conserved hypothetical protein TIGR00147         |                         |    |    |   |   |   |   |
|          |                        |                      |         |         | 7.000  | 24.000  | 16.4273    | 24.0000  |                                                  |                         |    |    |   |   |   |   |
| SGO_1390 | -0.644                 | 6.055                | 0.0041  | 0.0125  | 5.000  | 20.000  | 10.8971    | 20.8142  | ligA; DNA ligase, NAD-dependent                  |                         |    |    |   |   |   |   |
|          |                        |                      |         |         | 6.500  | 19.500  | 15.2539    | 19.5000  |                                                  |                         |    |    |   |   |   |   |
| SGO_1397 | 0.483                  | 6.995                | 0.0216  | 0.1016  | 15.000 | 20.000  | 32.6913    | 20.8142  | map; methionine aminopeptidase, type I           |                         |    |    |   |   |   |   |
|          |                        |                      |         |         | 17.500 | 33.000  | 41.0682    | 33.0000  |                                                  |                         |    |    |   |   |   |   |

- Show detected proteins only
- Show all proteins

Proteins found: 769

Filter by category:

ABC Transporter

Test

Cutoff

q-Value

.005

p-Value

|             | Signif | Direction | Applies To   |
|-------------|--------|-----------|--------------|
| Red         | yes    | +         | ratios, bars |
| Yellow      | no     | n/a       | bars         |
| Green       | yes    | -         | ratios, bars |
| Pink        | yes    | +         | p-, q-Values |
| Light Green | yes    | -         | p-, q-Values |

Dot Plots Dot Plots

Summary Table

SgFn vs Sg

SgPg vs Sg

SgPgFn vs Sg

SgPg vs SgFn

SgPgFn vs SgFn

SgPgFn vs SgPg

Coverage

SgFn vs Sg

Raw

Normalized

Log<sub>2</sub> Ratios

| Protein  | SgFn vs Sg             |                      |         |         | Raw      |          | Normalized |           | Description                                                                  | Log <sub>2</sub> Ratios |    |    |   |   |   |   |
|----------|------------------------|----------------------|---------|---------|----------|----------|------------|-----------|------------------------------------------------------------------------------|-------------------------|----|----|---|---|---|---|
|          | Log <sub>2</sub> Ratio | Log <sub>2</sub> Sum | q-Value | p-Value | SgFn     | Sg       | SgFn       | Sg        |                                                                              | -6                      | -4 | -2 | 0 | 2 | 4 | 6 |
| SGO_1398 | -1.383                 | 5.608                | 0.0018  | 0.0044  | 2.500    | 15.000   | 5.4486     | 15.6106   | hypothetical protein SGO_1398                                                |                         |    |    |   |   |   |   |
|          |                        |                      |         |         | 3.500    | 19.500   | 8.2136     | 19.5000   |                                                                              |                         |    |    |   |   |   |   |
| SGO_1400 | -0.055                 | 6.325                | 0.1011  | 0.6549  | 10.000   | 18.500   | 21.7942    | 19.2531   | murA-2; UDP-N-acetylglucosamine 1-carboxyvinyltransferase                    |                         |    |    |   |   |   |   |
|          |                        |                      |         |         | 7.500    | 21.500   | 17.6007    | 21.5000   |                                                                              |                         |    |    |   |   |   |   |
| SGO_1413 | 0.215                  | 5.654                | 0.0954  | 0.6144  | 3.500    | 7.000    | 7.6280     | 7.2850    | first chain of major exonuclease RexA                                        |                         |    |    |   |   |   |   |
|          |                        |                      |         |         | 8.500    | 15.500   | 19.9474    | 15.5000   |                                                                              |                         |    |    |   |   |   |   |
| SGO_1414 | 1.306                  | 5.724                | 0.0082  | 0.0306  | 6.500    | 5.500    | 14.1662    | 5.7239    | rexB; putative exonuclease RexB                                              |                         |    |    |   |   |   |   |
|          |                        |                      |         |         | 10.000   | 9.500    | 23.4676    | 9.5000    |                                                                              |                         |    |    |   |   |   |   |
| SGO_1422 | 1.421                  | 7.816                | 0.0049  | 0.0157  | 29.500   | 28.500   | 64.2929    | 29.6602   | hypothetical protein SGO_1422                                                |                         |    |    |   |   |   |   |
|          |                        |                      |         |         | 43.000   | 30.500   | 100.9105   | 30.5000   |                                                                              |                         |    |    |   |   |   |   |
| SGO_1426 | 0.877                  | 13.890               | 0.0009  | 0.0017  | 2120.500 | 2771.500 | 4621.4644  | 2884.3267 | eno; enolase                                                                 |                         |    |    |   |   |   |   |
|          |                        |                      |         |         | 2216.500 | 2470.500 | 5201.5866  | 2470.5000 |                                                                              |                         |    |    |   |   |   |   |
| SGO_1431 | -1.232                 | 10.435               | 0.0057  | 0.0190  | 102.000  | 570.000  | 222.3010   | 593.2045  | EzrA; Septation ring formation regulator ezrA                                |                         |    |    |   |   |   |   |
|          |                        |                      |         |         | 79.000   | 383.500  | 185.3938   | 383.5000  |                                                                              |                         |    |    |   |   |   |   |
| SGO_1432 | -0.233                 | 7.339                | 0.0479  | 0.2714  | 16.000   | 33.500   | 34.8708    | 34.8638   | gyrB; DNA gyrase, B subunit                                                  |                         |    |    |   |   |   |   |
|          |                        |                      |         |         | 16.500   | 53.500   | 38.7215    | 53.5000   |                                                                              |                         |    |    |   |   |   |   |
| SGO_1434 | 1.420                  | 4.000                | 0.0260  | 0.1301  | 3.500    |          | 7.6280     |           | thiJ; 4-methyl-5(beta-hydroxyethyl)-thiazole monophosphate synthesis protein |                         |    |    |   |   |   |   |
|          |                        |                      |         |         | 2.500    | 2.500    | 5.8669     | 2.5000    |                                                                              |                         |    |    |   |   |   |   |
| SGO_1439 | -1.950                 | 7.156                | 0.0001  | 0.0000  | 7.000    | 55.500   | 15.2560    | 57.7594   | ftsX; cell division protein FtsX                                             |                         |    |    |   |   |   |   |
|          |                        |                      |         |         | 6.000    | 55.500   | 14.0805    | 55.5000   |                                                                              |                         |    |    |   |   |   |   |
| SGO_1440 | -0.192                 | 8.633                | 0.0018  | 0.0041  | 42.500   | 104.500  | 92.6254    | 108.7542  | cell-division ATP-binding protein FtsE                                       |                         |    |    |   |   |   |   |
|          |                        |                      |         |         | 39.500   | 103.000  | 92.6969    | 103.0000  |                                                                              |                         |    |    |   |   |   |   |
| SGO_1441 | 1.397                  | 6.689                | 0.0036  | 0.0106  | 14.000   | 14.500   | 30.5119    | 15.0903   | prfB; peptide chain release factor 2                                         |                         |    |    |   |   |   |   |
|          |                        |                      |         |         | 19.000   | 13.000   | 44.5884    | 13.0000   |                                                                              |                         |    |    |   |   |   |   |

- Show detected proteins only  
 Show all proteins

Proteins found:  
769

Filter by category:

ABC Transporter

Test

Cutoff

q-Value

.005

p-Value

|             | Signif | Direction | Applies To   |
|-------------|--------|-----------|--------------|
| Red         | yes    | +         | ratios, bars |
| Yellow      | no     | n/a       | bars         |
| Green       | yes    | -         | ratios, bars |
| Pink        | yes    | +         | p-, q-Values |
| Light Green | yes    | -         | p-, q-Values |

Dot Plots Dot Plots

Summary Table

SgFn vs Sg

SgPg vs Sg

SgPgFn vs Sg

SgPg vs SgFn

SgPgFn vs SgFn

SgPgFn vs SgPg

Coverage

| Protein  | SgFn vs Sg             |                      |         |         | Raw    |         | Normalized |          | Description                                                      | Log <sub>2</sub> Ratios |    |    |   |   |   |
|----------|------------------------|----------------------|---------|---------|--------|---------|------------|----------|------------------------------------------------------------------|-------------------------|----|----|---|---|---|
|          | Log <sub>2</sub> Ratio | Log <sub>2</sub> Sum | q-Value | p-Value | SgFn   | Sg      | SgFn       | Sg       |                                                                  | -6                      | -4 | -2 | 0 | 2 | 4 |
| SGO_1446 | 0.050                  | 6.385                | 0.1420  | 0.9578  | 8.500  | 15.000  | 18.5251    | 15.6106  | murF; UDP-N-acetylmuramoyl-tripeptide--D-alanyl-D-alanine ligase |                         |    |    |   |   |   |
|          |                        |                      |         |         | 10.000 | 26.000  | 23.4676    | 26.0000  |                                                                  |                         |    |    |   |   |   |
| SGO_1447 | 0.192                  | 6.727                | 0.0003  | 0.0002  | 13.000 | 23.500  | 28.3325    | 24.4567  | ddlA; D-Ala-D-Ala ligase                                         |                         |    |    |   |   |   |
|          |                        |                      |         |         | 12.000 | 25.000  | 28.1611    | 25.0000  |                                                                  |                         |    |    |   |   |   |
| SGO_1450 | 0.488                  | 5.729                | 0.1066  | 0.6933  | 6.000  | 5.000   | 13.0765    | 5.2035   | hypothetical protein SGO_1450                                    |                         |    |    |   |   |   |
|          |                        |                      |         |         | 6.500  | 19.500  | 15.2539    | 19.5000  |                                                                  |                         |    |    |   |   |   |
| SGO_1451 | -0.022                 | 6.949                | 0.1451  | 0.9850  | 17.000 | 33.500  | 37.0502    | 34.8638  | frr; ribosome recycling factor                                   |                         |    |    |   |   |   |
|          |                        |                      |         |         | 10.500 | 27.000  | 24.6409    | 27.0000  |                                                                  |                         |    |    |   |   |   |
| SGO_1452 | 0.222                  | 6.908                | 0.0294  | 0.1514  | 15.000 | 30.500  | 32.6913    | 31.7416  | pyrH; uridylate kinase                                           |                         |    |    |   |   |   |
|          |                        |                      |         |         | 13.500 | 24.000  | 31.6812    | 24.0000  |                                                                  |                         |    |    |   |   |   |
| SGO_1455 | 0.360                  | 9.165                | 0.0027  | 0.0075  | 72.500 | 129.500 | 158.0081   | 134.7719 | rplA; ribosomal protein L1                                       |                         |    |    |   |   |   |
|          |                        |                      |         |         | 70.000 | 117.000 | 164.2730   | 117.0000 |                                                                  |                         |    |    |   |   |   |
| SGO_1456 | -0.623                 | 7.371                | 0.0080  | 0.0297  | 18.500 | 46.500  | 40.3193    | 48.3930  | rplK; ribosomal protein L11                                      |                         |    |    |   |   |   |
|          |                        |                      |         |         | 11.000 | 51.000  | 25.8143    | 51.0000  |                                                                  |                         |    |    |   |   |   |
| SGO_1458 | -1.358                 | 7.397                | 0.0062  | 0.0213  | 13.000 | 71.500  | 28.3325    | 74.4107  | aha1; cation-transporting ATPase yfgQ                            |                         |    |    |   |   |   |
|          |                        |                      |         |         | 8.000  | 47.000  | 18.7741    | 47.0000  |                                                                  |                         |    |    |   |   |   |
| SGO_1460 | -2.935                 | 6.888                | 0.0009  | 0.0018  | 3.000  | 57.500  | 6.5383     | 59.8408  | DNA translocase ftsK                                             |                         |    |    |   |   |   |
|          |                        |                      |         |         | 3.000  | 45.000  | 7.0403     | 45.0000  |                                                                  |                         |    |    |   |   |   |
| SGO_1463 | -2.423                 | 7.258                | 0.0002  | 0.0002  | 7.000  | 59.500  | 15.2560    | 61.9222  | peptidyl-prolyl cis-trans isomerase                              |                         |    |    |   |   |   |
|          |                        |                      |         |         | 4.000  | 66.500  | 9.3870     | 66.5000  |                                                                  |                         |    |    |   |   |   |
| SGO_1465 | -1.851                 | 6.642                | 0.0016  | 0.0037  | 4.500  | 32.000  | 9.8074     | 33.3027  | ABC transporter, ATP-binding protein SP0770                      |                         |    |    |   |   |   |
|          |                        |                      |         |         | 5.000  | 45.000  | 11.7338    | 45.0000  |                                                                  |                         |    |    |   |   |   |
| SGO_1466 | -0.133                 | 5.958                | 0.0658  | 0.3968  | 6.500  | 18.500  | 14.1662    | 19.2531  | MTA/SAH nucleosidase                                             |                         |    |    |   |   |   |
|          |                        |                      |         |         | 6.500  | 13.500  | 15.2539    | 13.5000  |                                                                  |                         |    |    |   |   |   |

- Show detected proteins only
- Show all proteins

Proteins found: 769

Filter by category:

ABC Transporter

Test

Cutoff

q-Value

.005

p-Value

|             | Signif | Direction | Applies To   |
|-------------|--------|-----------|--------------|
| Red         | yes    | +         | ratios, bars |
| Yellow      | no     | n/a       | bars         |
| Green       | yes    | -         | ratios, bars |
| Pink        | yes    | +         | p-, q-Values |
| Light Green | yes    | -         | p-, q-Values |

Dot Plots Dot Plots

Summary Table

SgFn vs Sg

SgPg vs Sg

SgPgFn vs Sg

SgPg vs SgFn

SgPgFn vs SgFn

SgPgFn vs SgPg

Coverage

| Protein  | SgFn vs Sg             |                      |         |         | Raw    |        | Normalized |         | Description                                                | Log <sub>2</sub> Ratios |    |    |   |   |
|----------|------------------------|----------------------|---------|---------|--------|--------|------------|---------|------------------------------------------------------------|-------------------------|----|----|---|---|
|          | Log <sub>2</sub> Ratio | Log <sub>2</sub> Sum | q-Value | p-Value | SgFn   | Sg     | SgFn       | Sg      |                                                            | -6                      | -4 | -2 | 0 | 2 |
| SGO_1469 | -0.341                 | 7.526                | 0.0005  | 0.0007  | 19.000 | 48.500 | 41.4090    | 50.4744 | glmU; UDP-N-acetylglucosamine pyrophosphorylase            |                         |    |    |   |   |
|          |                        |                      |         |         | 17.000 | 52.500 | 39.8949    | 52.5000 |                                                            |                         |    |    |   |   |
| SGO_1472 | 1.625                  | 4.942                | 0.0553  | 0.3203  | 8.500  |        | 18.5251    |         | acetyltransferase, GNAT family                             |                         |    |    |   |   |
|          |                        |                      |         |         | 3.500  | 4.000  | 8.2136     | 4.0000  |                                                            |                         |    |    |   |   |
| SGO_1486 | 2.124                  | 3.744                |         |         | 5.000  |        | 10.8971    |         | beta-galactosidase                                         |                         |    |    |   |   |
|          |                        |                      |         |         |        | 2.500  |            | 2.5000  |                                                            |                         |    |    |   |   |
| SGO_1487 | -0.501                 | 7.346                | 0.0093  | 0.0359  | 17.500 | 41.000 | 38.1399    | 42.6691 | LPXTG cell wall surface protein, Cna protein B-type domain |                         |    |    |   |   |
|          |                        |                      |         |         | 12.500 | 52.500 | 29.3345    | 52.5000 |                                                            |                         |    |    |   |   |
| SGO_1493 | -1.485                 | 7.194                | 0.0009  | 0.0015  | 8.000  | 47.000 | 17.4354    | 48.9134 | hypothetical protein SGO_1493                              |                         |    |    |   |   |
|          |                        |                      |         |         | 9.000  | 59.000 | 21.1208    | 59.0000 |                                                            |                         |    |    |   |   |
| SGO_1512 | 1.099                  | 4.069                | 0.0412  | 0.2271  | 2.500  | 3.000  | 5.4486     | 3.1221  | lacG; 6-phospho-beta-galactosidase                         |                         |    |    |   |   |
|          |                        |                      |         |         | 3.500  |        | 8.2136     |         |                                                            |                         |    |    |   |   |
| SGO_1529 | -1.110                 | 6.071                | 0.0007  | 0.0011  | 5.500  | 21.000 | 11.9868    | 21.8549 | hypothetical protein SGO_1529                              |                         |    |    |   |   |
|          |                        |                      |         |         | 4.000  | 24.000 | 9.3870     | 24.0000 |                                                            |                         |    |    |   |   |
| SGO_1530 | -0.620                 | 8.210                | 0.0111  | 0.0443  | 32.500 | 95.500 | 70.8312    | 99.3878 | methionine-tRNA ligase                                     |                         |    |    |   |   |
|          |                        |                      |         |         | 20.000 | 79.000 | 46.9351    | 79.0000 |                                                            |                         |    |    |   |   |
| SGO_1531 | 0.311                  | 5.961                | 0.0299  | 0.1548  | 9.500  | 13.000 | 20.7045    | 13.5292 | xth; exodeoxyribonuclease III                              |                         |    |    |   |   |
|          |                        |                      |         |         | 6.000  | 14.000 | 14.0805    | 14.0000 |                                                            |                         |    |    |   |   |
| SGO_1534 | 1.195                  | 5.714                | 0.0220  | 0.1038  | 8.000  | 3.500  | 17.4354    | 3.6425  | ArsC family                                                |                         |    |    |   |   |
|          |                        |                      |         |         | 7.000  | 15.000 | 16.4273    | 15.0000 |                                                            |                         |    |    |   |   |
| SGO_1536 | -0.922                 | 6.083                | 0.0065  | 0.0228  | 6.500  | 18.000 | 14.1662    | 18.7328 | conserved hypothetical protein TIGR00096                   |                         |    |    |   |   |
|          |                        |                      |         |         | 4.000  | 25.500 | 9.3870     | 25.5000 |                                                            |                         |    |    |   |   |
| SGO_1539 | 0.151                  | 6.166                | 0.0639  | 0.3839  | 10.500 | 16.000 | 22.8839    | 16.6514 | tmk; thymidylate kinase                                    |                         |    |    |   |   |
|          |                        |                      |         |         | 6.500  | 17.000 | 15.2539    | 17.0000 |                                                            |                         |    |    |   |   |

- Show detected proteins only
- Show all proteins

Proteins found: 769

Filter by category:

ABC Transporter

Test

Cutoff

q-Value

.005

p-Value

|             | Signif | Direction | Applies To   |
|-------------|--------|-----------|--------------|
| Red         | yes    | +         | ratios, bars |
| Yellow      | no     | n/a       | bars         |
| Green       | yes    | -         | ratios, bars |
| Pink        | yes    | +         | p-, q-Values |
| Light Green | yes    | -         | p-, q-Values |

Dot Plots Dot Plots

Summary Table

SgFn vs Sg

SgPg vs Sg

SgPgFn vs Sg

SgPg vs SgFn

SgPgFn vs SgFn

SgPgFn vs SgPg

Coverage

SgFn vs Sg

Raw

Normalized

Log<sub>2</sub> Ratios

| Protein  | SgFn vs Sg             |                      |         |         | Raw     |         | Normalized |          | Description                                                    | Log <sub>2</sub> Ratios |    |    |   |   |   |   |
|----------|------------------------|----------------------|---------|---------|---------|---------|------------|----------|----------------------------------------------------------------|-------------------------|----|----|---|---|---|---|
|          | Log <sub>2</sub> Ratio | Log <sub>2</sub> Sum | q-Value | p-Value | SgFn    | Sg      | SgFn       | Sg       |                                                                | -6                      | -4 | -2 | 0 | 2 | 4 | 6 |
| SGO_1541 | -0.363                 | 8.032                | 0.0624  | 0.3731  | 18.000  | 60.500  | 39.2296    | 62.9629  | atpC; ATP synthase F1, epsilon subunit                         |                         |    |    |   |   |   |   |
|          |                        |                      |         |         | 33.500  | 81.000  | 78.6164    | 81.0000  |                                                                |                         |    |    |   |   |   |   |
| SGO_1542 | 0.619                  | 11.040               | 0.0001  | 0.0001  | 290.500 | 410.500 | 633.1221   | 427.2113 | atpD; ATP synthase F1, beta subunit                            |                         |    |    |   |   |   |   |
|          |                        |                      |         |         | 273.500 | 403.500 | 641.8380   | 403.5000 |                                                                |                         |    |    |   |   |   |   |
| SGO_1543 | 0.383                  | 8.135                | 0.0131  | 0.0553  | 41.500  | 60.500  | 90.4460    | 62.9629  | atpG; ATP synthase F1, gamma subunit                           |                         |    |    |   |   |   |   |
|          |                        |                      |         |         | 29.500  | 58.500  | 69.2293    | 58.5000  |                                                                |                         |    |    |   |   |   |   |
| SGO_1544 | -0.415                 | 10.250               | 0.0008  | 0.0014  | 125.500 | 330.000 | 273.5175   | 343.4342 | atpA; ATP synthase F1, alpha subunit                           |                         |    |    |   |   |   |   |
|          |                        |                      |         |         | 106.000 | 352.000 | 248.7562   | 352.0000 |                                                                |                         |    |    |   |   |   |   |
| SGO_1545 | 0.015                  | 8.292                | 0.1306  | 0.8681  | 33.000  | 80.000  | 71.9209    | 83.2568  | atpH; ATP synthase F1, delta subunit                           |                         |    |    |   |   |   |   |
|          |                        |                      |         |         | 36.500  | 72.500  | 85.6566    | 72.5000  |                                                                |                         |    |    |   |   |   |   |
| SGO_1546 | -1.156                 | 8.155                | 0.0064  | 0.0223  | 30.000  | 86.500  | 65.3827    | 90.0214  | atpF; ATP synthase F0, B subunit                               |                         |    |    |   |   |   |   |
|          |                        |                      |         |         | 12.000  | 101.500 | 28.1611    | 101.5000 |                                                                |                         |    |    |   |   |   |   |
| SGO_1550 | 0.171                  | 7.857                | 0.0596  | 0.3503  | 25.000  | 45.000  | 54.4856    | 46.8319  | glgP-1; glycogen phosphorylase                                 |                         |    |    |   |   |   |   |
|          |                        |                      |         |         | 29.000  | 62.500  | 68.0559    | 62.5000  |                                                                |                         |    |    |   |   |   |   |
| SGO_1551 | 2.324                  | 7.034                | 0.0017  | 0.0041  | 25.500  | 5.000   | 55.5753    | 5.2035   | glgA; Glycogen synthase                                        |                         |    |    |   |   |   |   |
|          |                        |                      |         |         | 21.000  | 21.000  | 49.2819    | 21.0000  |                                                                |                         |    |    |   |   |   |   |
| SGO_1552 | 1.390                  | 7.624                | 0.0016  | 0.0035  | 35.500  | 32.500  | 77.3695    | 33.8231  | glgD; glucose-1-phosphate<br>adenylyltransferase, GlgD subunit |                         |    |    |   |   |   |   |
|          |                        |                      |         |         | 27.500  | 21.500  | 64.5358    | 21.5000  |                                                                |                         |    |    |   |   |   |   |
| SGO_1553 | 1.980                  | 7.868                | 0.0023  | 0.0062  | 50.500  | 18.500  | 110.0608   | 19.2531  | glgC; glucose-1-phosphate<br>adenylyltransferase               |                         |    |    |   |   |   |   |
|          |                        |                      |         |         | 32.500  | 28.000  | 76.2696    | 28.0000  |                                                                |                         |    |    |   |   |   |   |
| SGO_1554 | 2.537                  | 8.474                | 0.0005  | 0.0007  | 75.000  | 19.000  | 163.4567   | 19.7735  | glgB; 1,4-alpha-glucan branching enzyme                        |                         |    |    |   |   |   |   |
|          |                        |                      |         |         | 59.000  | 34.000  | 138.4587   | 34.0000  |                                                                |                         |    |    |   |   |   |   |
| SGO_1555 | 0.328                  | 11.311               | 0.0025  | 0.0069  | 329.500 | 575.500 | 718.1195   | 598.9284 | ptsI; phosphoenolpyruvate-protein<br>phosphotransferase        |                         |    |    |   |   |   |   |
|          |                        |                      |         |         | 296.000 | 528.500 | 694.6400   | 528.5000 |                                                                |                         |    |    |   |   |   |   |

- Show detected proteins only  
 Show all proteins

Proteins found:  
769

Filter by category:

ABC Transporter

Test

Cutoff

q-Value

p-Value

.005

|             | Signif | Direction | Applies To   |
|-------------|--------|-----------|--------------|
| Red         | yes    | +         | ratios, bars |
| Yellow      | no     | n/a       | bars         |
| Green       | yes    | -         | ratios, bars |
| Pink        | yes    | +         | p-, q-Values |
| Light Green | yes    | -         | p-, q-Values |

Dot Plots Dot Plots

Summary Table

SgFn vs Sg

SgPg vs Sg

SgPgFn vs Sg

SgPg vs SgFn

SgPgFn vs SgFn

SgPgFn vs SgPg

Coverage

| Protein  | SgFn vs Sg             |                      |         |         | Raw     |         | Normalized |          | Description                                                  | Log <sub>2</sub> Ratios |    |    |   |   |
|----------|------------------------|----------------------|---------|---------|---------|---------|------------|----------|--------------------------------------------------------------|-------------------------|----|----|---|---|
|          | Log <sub>2</sub> Ratio | Log <sub>2</sub> Sum | q-Value | p-Value | SgFn    | Sg      | SgFn       | Sg       |                                                              | -6                      | -4 | -2 | 0 | 2 |
| SGO_1556 | 0.623                  | 11.703               | 0.0038  | 0.0116  | 515.500 | 646.000 | 1123.4920  | 672.2984 | phosphocarrier protein HPr                                   |                         |    |    |   |   |
|          |                        |                      |         |         | 384.500 | 635.500 | 902.3280   | 635.5000 |                                                              |                         |    |    |   |   |
| SGO_1558 | 0.723                  | 8.951                | 0.0056  | 0.0187  | 81.000  | 83.000  | 176.5332   | 86.3789  | nrdE; ribonucleoside-diphosphate reductase large chain       |                         |    |    |   |   |
|          |                        |                      |         |         | 56.500  | 99.500  | 132.5918   | 99.5000  |                                                              |                         |    |    |   |   |
| SGO_1559 | 0.091                  | 7.735                | 0.0544  | 0.3137  | 24.500  | 45.500  | 53.3958    | 47.3523  | ribonucleoside-diphosphate reductase, beta subunit           |                         |    |    |   |   |
|          |                        |                      |         |         | 24.000  | 56.000  | 56.3222    | 56.0000  |                                                              |                         |    |    |   |   |
| SGO_1570 | -0.511                 | 9.201                | 0.0126  | 0.0527  | 65.000  | 146.500 | 141.6624   | 152.4640 | alaS; alanyl-tRNA synthetase                                 |                         |    |    |   |   |
|          |                        |                      |         |         | 43.500  | 192.500 | 102.0839   | 192.5000 |                                                              |                         |    |    |   |   |
| SGO_1572 | -4.463                 | 9.699                | 0.0000  | 0.0000  | 11.500  | 377.500 | 25.0634    | 392.8679 | proteinase maturation protein, putative                      |                         |    |    |   |   |
|          |                        |                      |         |         | 5.500   | 400.500 | 12.9072    | 400.5000 |                                                              |                         |    |    |   |   |
| SGO_1573 | 1.276                  | 3.945                |         |         | 5.000   |         | 10.8971    |          | O-methyltransferase family protein                           |                         |    |    |   |   |
|          |                        |                      |         |         |         | 4.500   |            | 4.5000   |                                                              |                         |    |    |   |   |
| SGO_1574 | 0.665                  | 8.801                | 0.0015  | 0.0034  | 67.500  | 81.000  | 147.1110   | 84.2975  | pepF-1; oligoendopeptidase F                                 |                         |    |    |   |   |
|          |                        |                      |         |         | 54.000  | 88.000  | 126.7249   | 88.0000  |                                                              |                         |    |    |   |   |
| SGO_1587 | 0.505                  | 6.189                | 0.0397  | 0.2167  | 8.000   | 10.000  | 17.4354    | 10.4071  | queA; S-adenosylmethionine:tRNA ribosyltransferase-isomerase |                         |    |    |   |   |
|          |                        |                      |         |         | 10.500  | 20.500  | 24.6409    | 20.5000  |                                                              |                         |    |    |   |   |
| SGO_1589 | 2.726                  | 6.450                | 0.0001  | 0.0000  | 17.000  | 4.500   | 37.0502    | 4.6832   | arcT; putative transaminase/peptidase                        |                         |    |    |   |   |
|          |                        |                      |         |         | 16.500  | 7.000   | 38.7215    | 7.0000   |                                                              |                         |    |    |   |   |
| SGO_1590 | -1.292                 | 7.433                | 0.0008  | 0.0014  | 13.500  | 55.500  | 29.4222    | 57.7594  | arcD; arginine-ornithine antiporter                          |                         |    |    |   |   |
|          |                        |                      |         |         | 9.000   | 64.500  | 21.1208    | 64.5000  |                                                              |                         |    |    |   |   |
| SGO_1591 | 1.169                  | 8.010                | 0.0009  | 0.0015  | 40.000  | 31.500  | 87.1769    | 32.7824  | arcC; carbamate kinase                                       |                         |    |    |   |   |
|          |                        |                      |         |         | 38.500  | 47.500  | 90.3501    | 47.5000  |                                                              |                         |    |    |   |   |
| SGO_1592 | 2.366                  | 11.142               | 0.0009  | 0.0016  | 379.500 | 174.500 | 827.0906   | 181.6038 | arcB; ornithine carbamoyltransferase                         |                         |    |    |   |   |
|          |                        |                      |         |         | 455.000 | 183.000 | 1067.7744  | 183.0000 |                                                              |                         |    |    |   |   |

- Show detected proteins only
- Show all proteins

Proteins found: 769

Filter by category:

ABC Transporter

Test

Cutoff

q-Value

.005

p-Value

|             | Signif | Direction | Applies To   |
|-------------|--------|-----------|--------------|
| Red         | yes    | +         | ratios, bars |
| Yellow      | no     | n/a       | bars         |
| Green       | yes    | -         | ratios, bars |
| Pink        | yes    | +         | p-, q-Values |
| Light Green | yes    | -         | p-, q-Values |

Dot Plots Dot Plots



Summary Table

SgFn vs Sg

SgPg vs Sg

SgPgFn vs Sg

SgPg vs SgFn

SgPgFn vs SgFn

SgPgFn vs SgPg

Coverage

| Protein  | SgFn vs Sg             |                      |         |         | Raw     |         | Normalized |          | Description                                      | Log <sub>2</sub> Ratios |    |    |   |   |
|----------|------------------------|----------------------|---------|---------|---------|---------|------------|----------|--------------------------------------------------|-------------------------|----|----|---|---|
|          | Log <sub>2</sub> Ratio | Log <sub>2</sub> Sum | q-Value | p-Value | SgFn    | Sg      | SgFn       | Sg       |                                                  | -6                      | -4 | -2 | 0 | 2 |
| SGO_1593 | 1.771                  | 10.509               | 0.0002  | 0.0001  | 270.000 | 148.500 | 588.4439   | 154.5454 | arcA; arginine deiminase                         |                         |    |    |   |   |
|          |                        |                      |         |         | 229.500 | 176.000 | 538.5807   | 176.0000 |                                                  |                         |    |    |   |   |
| SGO_1599 | 2.054                  | 10.580               | 0.0002  | 0.0002  | 298.500 | 135.500 | 650.5575   | 141.0162 | sodA; manganese-dependent superoxide dismutase   |                         |    |    |   |   |
|          |                        |                      |         |         | 248.500 | 156.000 | 583.1691   | 156.0000 |                                                  |                         |    |    |   |   |
| SGO_1604 | -1.738                 | 6.821                | 0.0006  | 0.0009  | 6.000   | 38.000  | 13.0765    | 39.5470  | acyltransferase family protein                   |                         |    |    |   |   |
|          |                        |                      |         |         | 5.500   | 47.500  | 12.9072    | 47.5000  |                                                  |                         |    |    |   |   |
| SGO_1605 | -3.386                 | 6.286                | 0.0004  | 0.0005  | 1.500   | 31.000  | 3.2691     | 32.2620  | P-type ATPase, metal cation transport            |                         |    |    |   |   |
|          |                        |                      |         |         | 1.500   | 39.000  | 3.5201     | 39.0000  |                                                  |                         |    |    |   |   |
| SGO_1609 | -2.177                 | 7.848                | 0.0001  | 0.0000  | 10.000  | 88.500  | 21.7942    | 92.1028  | ATP-dependent RNA helicase, DEAD/DEAH box family |                         |    |    |   |   |
|          |                        |                      |         |         | 8.500   | 96.500  | 19.9474    | 96.5000  |                                                  |                         |    |    |   |   |
| SGO_1617 | 0.495                  | 6.407                | 0.0360  | 0.1921  | 9.500   | 12.000  | 20.7045    | 12.4885  | prfC; peptide chain release factor 3             |                         |    |    |   |   |
|          |                        |                      |         |         | 12.000  | 23.500  | 28.1611    | 23.5000  |                                                  |                         |    |    |   |   |
| SGO_1619 | -2.956                 | 9.529                | 0.0009  | 0.0016  | 19.000  | 357.500 | 41.4090    | 372.0537 | cation-transporting ATPase, E1-E2 family         |                         |    |    |   |   |
|          |                        |                      |         |         | 18.000  | 283.000 | 42.2416    | 283.0000 |                                                  |                         |    |    |   |   |
| SGO_1621 | -0.202                 | 5.929                | 0.0227  | 0.1077  | 6.000   | 14.500  | 13.0765    | 15.0903  | HD domain protein                                |                         |    |    |   |   |
|          |                        |                      |         |         | 6.500   | 17.500  | 15.2539    | 17.5000  |                                                  |                         |    |    |   |   |
| SGO_1622 | 1.367                  | 6.408                | 0.0013  | 0.0026  | 15.000  | 14.000  | 32.6913    | 14.5699  | Cof family protein                               |                         |    |    |   |   |
|          |                        |                      |         |         | 12.000  | 9.500   | 28.1611    | 9.5000   |                                                  |                         |    |    |   |   |
| SGO_1623 | -0.490                 | 6.963                | 0.0014  | 0.0030  | 12.500  | 33.500  | 27.2428    | 34.8638  | murM; MurM                                       |                         |    |    |   |   |
|          |                        |                      |         |         | 10.500  | 38.000  | 24.6409    | 38.0000  |                                                  |                         |    |    |   |   |
| SGO_1624 | 0.137                  | 6.102                | 0.1018  | 0.6598  | 10.000  | 19.500  | 21.7942    | 20.2938  | murN; MurN protein                               |                         |    |    |   |   |
|          |                        |                      |         |         | 6.000   | 12.500  | 14.0805    | 12.5000  |                                                  |                         |    |    |   |   |
| SGO_1625 | -0.506                 | 8.384                | 0.0006  | 0.0009  | 30.000  | 95.000  | 65.3827    | 98.8674  | acetoin utilization putative/CBS domain protein  |                         |    |    |   |   |
|          |                        |                      |         |         | 31.000  | 97.000  | 72.7495    | 97.0000  |                                                  |                         |    |    |   |   |

- Show detected proteins only
- Show all proteins

Proteins found: 769

Filter by category:

ABC Transporter

Test

Cutoff

q-Value

.005

p-Value

|             | Signif | Direction | Applies To   |
|-------------|--------|-----------|--------------|
| Red         | yes    | +         | ratios, bars |
| Yellow      | no     | n/a       | bars         |
| Green       | yes    | -         | ratios, bars |
| Pink        | yes    | +         | p-, q-Values |
| Light Green | yes    | -         | p-, q-Values |

Dot Plots Dot Plots

Summary Table

SgFn vs Sg

SgPg vs Sg

SgPgFn vs Sg

SgPg vs SgFn

SgPgFn vs SgFn

SgPgFn vs SgPg

Coverage

SgFn vs Sg

Raw

Normalized

Log<sub>2</sub> Ratios

| Protein  | SgFn vs Sg             |                      |         |         | Raw    |         | Normalized |          | Description                                                              | Log <sub>2</sub> Ratios |    |    |   |   |   |   |
|----------|------------------------|----------------------|---------|---------|--------|---------|------------|----------|--------------------------------------------------------------------------|-------------------------|----|----|---|---|---|---|
|          | Log <sub>2</sub> Ratio | Log <sub>2</sub> Sum | q-Value | p-Value | SgFn   | Sg      | SgFn       | Sg       |                                                                          | -6                      | -4 | -2 | 0 | 2 | 4 | 6 |
| SGO_1626 | -2.040                 | 6.616                | 0.0213  | 0.0998  |        | 37.000  |            | 38.5063  | branched-chain amino acid ABC transporter, ATP-binding protein           |                         |    |    |   |   |   |   |
|          |                        |                      |         |         | 4.500  | 49.000  | 10.5604    | 49.0000  |                                                                          |                         |    |    |   |   |   |   |
| SGO_1630 | -3.259                 | 10.217               | 0.0000  | 0.0000  | 27.500 | 509.000 | 59.9341    | 529.7212 | branched-chain amino acid ABC transporter, amino acid-binding protein    |                         |    |    |   |   |   |   |
|          |                        |                      |         |         | 22.500 | 547.500 | 52.8020    | 547.5000 |                                                                          |                         |    |    |   |   |   |   |
| SGO_1632 | 1.202                  | 8.084                | 0.0031  | 0.0090  | 36.500 | 37.500  | 79.5489    | 39.0266  | clpP; ATP-dependent Clp protease, proteolytic subunit ClpP               |                         |    |    |   |   |   |   |
|          |                        |                      |         |         | 47.000 | 42.500  | 110.2976   | 42.5000  |                                                                          |                         |    |    |   |   |   |   |
| SGO_1633 | 1.254                  | 8.358                | 0.0018  | 0.0044  | 60.000 | 45.000  | 130.7653   | 46.8319  | upp; uracil phosphoribosyltransferase                                    |                         |    |    |   |   |   |   |
|          |                        |                      |         |         | 43.000 | 49.500  | 100.9105   | 49.5000  |                                                                          |                         |    |    |   |   |   |   |
| SGO_1634 | -4.978                 | 9.104                | 0.0000  | 0.0000  | 4.000  | 256.500 | 8.7177     | 266.9420 | magnesium-translocating P-type ATPase                                    |                         |    |    |   |   |   |   |
|          |                        |                      |         |         | 3.500  | 266.500 | 8.2136     | 266.5000 |                                                                          |                         |    |    |   |   |   |   |
| SGO_1638 | 1.909                  | 5.438                | 0.0023  | 0.0061  | 6.500  | 5.500   | 14.1662    | 5.7239   | murE; UDP-N-acetylmuramoylalanyl-D-glutamate--2,6-diaminopimelate ligase |                         |    |    |   |   |   |   |
|          |                        |                      |         |         | 8.500  | 3.500   | 19.9474    | 3.5000   |                                                                          |                         |    |    |   |   |   |   |
| SGO_1648 | 0.910                  | 8.722                | 0.0009  | 0.0016  | 62.000 | 61.500  | 135.1242   | 64.0036  | ppx1; inorganic pyrophosphatase, manganese-dependent                     |                         |    |    |   |   |   |   |
|          |                        |                      |         |         | 59.500 | 83.500  | 139.6320   | 83.5000  |                                                                          |                         |    |    |   |   |   |   |
| SGO_1649 | -0.303                 | 6.470                | 0.0116  | 0.0477  | 9.000  | 26.000  | 19.6148    | 27.0585  | act; pyruvate formate-lyase-activating enzyme                            |                         |    |    |   |   |   |   |
|          |                        |                      |         |         | 8.500  | 22.000  | 19.9474    | 22.0000  |                                                                          |                         |    |    |   |   |   |   |
| SGO_1651 | -2.162                 | 9.827                | 0.0000  | 0.0000  | 39.000 | 357.000 | 84.9975    | 371.5333 | LPXTG cell wall surface protein, nuclease/phosphatase domain             |                         |    |    |   |   |   |   |
|          |                        |                      |         |         | 34.500 | 371.000 | 80.9631    | 371.0000 |                                                                          |                         |    |    |   |   |   |   |
| SGO_1652 | -0.823                 | 6.776                | 0.0058  | 0.0195  | 10.000 | 28.500  | 21.7942    | 29.6602  | intracellular glycosyl hydrolase                                         |                         |    |    |   |   |   |   |
|          |                        |                      |         |         | 7.500  | 40.500  | 17.6007    | 40.5000  |                                                                          |                         |    |    |   |   |   |   |
| SGO_1653 | -2.067                 | 8.997                | 0.0002  | 0.0002  | 20.500 | 187.500 | 44.6782    | 195.1331 | trehalose PTS enzyme II                                                  |                         |    |    |   |   |   |   |
|          |                        |                      |         |         | 23.000 | 217.000 | 53.9754    | 217.0000 |                                                                          |                         |    |    |   |   |   |   |
| SGO_1655 | -1.918                 | 7.001                | 0.0023  | 0.0060  | 4.500  | 40.500  | 9.8074     | 42.1487  | CBS domain protein/possible hemolysin                                    |                         |    |    |   |   |   |   |
|          |                        |                      |         |         | 7.500  | 58.500  | 17.6007    | 58.5000  |                                                                          |                         |    |    |   |   |   |   |

- Show detected proteins only  
 Show all proteins

Proteins found:  
769

Filter by category:

ABC Transporter

Test

Cutoff

q-Value

.005

p-Value

|             | Signif | Direction | Applies To   |
|-------------|--------|-----------|--------------|
| Red         | yes    | +         | ratios, bars |
| Yellow      | no     | n/a       | bars         |
| Green       | yes    | -         | ratios, bars |
| Pink        | yes    | +         | p-, q-Values |
| Light Green | yes    | -         | p-, q-Values |

Dot Plots Dot Plots

Summary Table

SgFn vs Sg

SgPg vs Sg

SgPgFn vs Sg

SgPg vs SgFn

SgPgFn vs SgFn

SgPgFn vs SgPg

Coverage

| Protein  | SgFn vs Sg             |                      |         |         | Raw    |         | Normalized |          | Description                                                       | Log <sub>2</sub> Ratios |    |    |   |   |
|----------|------------------------|----------------------|---------|---------|--------|---------|------------|----------|-------------------------------------------------------------------|-------------------------|----|----|---|---|
|          | Log <sub>2</sub> Ratio | Log <sub>2</sub> Sum | q-Value | p-Value | SgFn   | Sg      | SgFn       | Sg       |                                                                   | -6                      | -4 | -2 | 0 | 2 |
| SGO_1661 | 0.772                  | 4.627                | 0.0794  | 0.4944  |        | 3.500   |            | 3.6425   | radical SAM protein, TIGR01212 family                             |                         |    |    |   |   |
|          |                        |                      |         |         | 4.500  | 10.500  | 10.5604    | 10.5000  |                                                                   |                         |    |    |   |   |
| SGO_1666 | 0.784                  | 7.821                | 0.0022  | 0.0057  | 33.000 | 33.500  | 71.9209    | 34.8638  | trkA; potassium uptake protein, Trk family                        |                         |    |    |   |   |
|          |                        |                      |         |         | 30.000 | 49.000  | 70.4027    | 49.0000  |                                                                   |                         |    |    |   |   |
| SGO_1669 | -0.888                 | 7.256                | 0.0099  | 0.0386  | 15.000 | 38.500  | 32.6913    | 40.0673  | ribosomal large subunit pseudouridine synthase B                  |                         |    |    |   |   |
|          |                        |                      |         |         | 9.000  | 59.000  | 21.1208    | 59.0000  |                                                                   |                         |    |    |   |   |
| SGO_1674 | 0.340                  | 5.823                | 0.0050  | 0.0159  | 7.500  | 13.000  | 16.3457    | 13.5292  | phosphodiesterase, MJ0936 family                                  |                         |    |    |   |   |
|          |                        |                      |         |         | 6.500  | 11.500  | 15.2539    | 11.5000  |                                                                   |                         |    |    |   |   |
| SGO_1675 | 0.255                  | 6.690                | 0.0603  | 0.3569  | 11.500 | 17.500  | 25.0634    | 18.2124  | HAM1 protein-like protein                                         |                         |    |    |   |   |
|          |                        |                      |         |         | 13.000 | 29.500  | 30.5078    | 29.5000  |                                                                   |                         |    |    |   |   |
| SGO_1676 | 0.999                  | 5.350                | 0.0014  | 0.0030  | 6.500  | 5.500   | 14.1662    | 5.7239   | murI; glutamate racemase                                          |                         |    |    |   |   |
|          |                        |                      |         |         | 5.500  | 8.000   | 12.9072    | 8.0000   |                                                                   |                         |    |    |   |   |
| SGO_1678 | 1.280                  | 6.005                | 0.0026  | 0.0070  | 9.000  | 7.500   | 19.6148    | 7.8053   | lysA; diaminopimelate decarboxylase                               |                         |    |    |   |   |
|          |                        |                      |         |         | 11.000 | 11.000  | 25.8143    | 11.0000  |                                                                   |                         |    |    |   |   |
| SGO_1679 | -2.373                 | 10.552               | 0.0000  | 0.0000  | 60.000 | 608.000 | 130.7653   | 632.7514 | phosphotransferase system enzyme II                               |                         |    |    |   |   |
|          |                        |                      |         |         | 48.000 | 625.000 | 112.6443   | 625.0000 |                                                                   |                         |    |    |   |   |
| SGO_1681 | -2.678                 | 10.136               | 0.0001  | 0.0000  | 30.500 | 471.500 | 66.4724    | 490.6946 | PTS system, mannose/fructose/sorbose family, IID component        |                         |    |    |   |   |
|          |                        |                      |         |         | 37.000 | 481.500 | 86.8300    | 481.5000 |                                                                   |                         |    |    |   |   |
| SGO_1683 | 0.183                  | 8.135                | 0.0676  | 0.4105  | 44.500 | 59.500  | 96.9843    | 61.9222  | serS; seryl-tRNA synthetase                                       |                         |    |    |   |   |
|          |                        |                      |         |         | 23.500 | 67.000  | 55.1488    | 67.0000  |                                                                   |                         |    |    |   |   |
| SGO_1685 | 1.132                  | 6.834                | 0.0008  | 0.0013  | 17.500 | 14.500  | 38.1399    | 15.0903  | putative peroxidase / antioxidant                                 |                         |    |    |   |   |
|          |                        |                      |         |         | 17.000 | 21.000  | 39.8949    | 21.0000  |                                                                   |                         |    |    |   |   |
| SGO_1687 | -0.326                 | 7.903                | 0.0149  | 0.0652  | 28.000 | 62.000  | 61.0238    | 64.5240  | accA; acetyl-CoA carboxylase, carboxyl transferase, alpha subunit |                         |    |    |   |   |
|          |                        |                      |         |         | 19.500 | 68.000  | 45.7618    | 68.0000  |                                                                   |                         |    |    |   |   |

- Show detected proteins only
- Show all proteins

Proteins found: 769

Filter by category:

ABC Transporter

Test

Cutoff

q-Value

.005

p-Value

|             | Signif | Direction | Applies To   |
|-------------|--------|-----------|--------------|
| Red         | yes    | +         | ratios, bars |
| Yellow      | no     | n/a       | bars         |
| Green       | yes    | -         | ratios, bars |
| Pink        | yes    | +         | p-, q-Values |
| Light Green | yes    | -         | p-, q-Values |

Dot Plots Dot Plots

Summary Table

SgFn vs Sg

SgPg vs Sg

SgPgFn vs Sg

SgPg vs SgFn

SgPgFn vs SgFn

SgPgFn vs SgPg

Coverage

SgFn vs Sg

Raw

Normalized

Log<sub>2</sub> Ratios

| Protein  | SgFn vs Sg             |                      |         |         | Raw     |         | Normalized |          | Description                                                      | Log <sub>2</sub> Ratios |    |    |   |   |   |
|----------|------------------------|----------------------|---------|---------|---------|---------|------------|----------|------------------------------------------------------------------|-------------------------|----|----|---|---|---|
|          | Log <sub>2</sub> Ratio | Log <sub>2</sub> Sum | q-Value | p-Value | SgFn    | Sg      | SgFn       | Sg       |                                                                  | -6                      | -4 | -2 | 0 | 2 | 4 |
| SGO_1688 | 0.081                  | 6.923                | 0.1412  | 0.9507  | 14.000  | 20.500  | 30.5119    | 21.3345  | accD; acetyl-CoA carboxylase, carboxyl transferase, beta subunit |                         |    |    |   |   |   |
|          |                        |                      |         |         | 13.000  | 39.000  | 30.5078    | 39.0000  |                                                                  |                         |    |    |   |   |   |
| SGO_1689 | 1.308                  | 7.985                | 0.0008  | 0.0013  | 38.500  | 30.500  | 83.9077    | 31.7416  | accC; acetyl-CoA carboxylase, biotin carboxylase                 |                         |    |    |   |   |   |
|          |                        |                      |         |         | 41.000  | 41.500  | 96.2170    | 41.5000  |                                                                  |                         |    |    |   |   |   |
| SGO_1691 | -0.102                 | 7.422                | 0.1200  | 0.7870  | 24.500  | 55.000  | 53.3958    | 57.2390  | accB; acetyl-CoA carboxylase, biotin carboxyl carrier protein    |                         |    |    |   |   |   |
|          |                        |                      |         |         | 12.500  | 31.500  | 29.3345    | 31.5000  |                                                                  |                         |    |    |   |   |   |
| SGO_1692 | 2.086                  | 10.166               | 0.0004  | 0.0004  | 197.500 | 101.000 | 430.4358   | 105.1117 | 3-oxoacyl-[acyl-carrier-protein] synthase                        |                         |    |    |   |   |   |
|          |                        |                      |         |         | 213.000 | 113.500 | 499.8592   | 113.5000 |                                                                  |                         |    |    |   |   |   |
| SGO_1693 | 1.153                  | 7.330                | 0.0003  | 0.0003  | 25.000  | 26.500  | 54.4856    | 27.5788  | fabG; 3-oxoacyl-(acyl-carrier-protein) reductase                 |                         |    |    |   |   |   |
|          |                        |                      |         |         | 24.000  | 22.500  | 56.3222    | 22.5000  |                                                                  |                         |    |    |   |   |   |
| SGO_1694 | 0.376                  | 6.814                | 0.0294  | 0.1515  | 12.000  | 20.000  | 26.1531    | 20.8142  | fabD; malonyl CoA-acyl carrier protein transacylase              |                         |    |    |   |   |   |
|          |                        |                      |         |         | 16.000  | 28.000  | 37.5481    | 28.0000  |                                                                  |                         |    |    |   |   |   |
| SGO_1695 | 0.088                  | 9.310                | 0.0294  | 0.1501  | 71.000  | 147.500 | 154.7390   | 153.5047 | enoyl-acyl carrier protein(ACP) reductase                        |                         |    |    |   |   |   |
|          |                        |                      |         |         | 73.500  | 154.000 | 172.4866   | 154.0000 |                                                                  |                         |    |    |   |   |   |
| SGO_1699 | 1.460                  | 6.054                | 0.0002  | 0.0002  | 11.000  | 7.500   | 23.9736    | 7.8053   | transcriptional regulator, MarR family                           |                         |    |    |   |   |   |
|          |                        |                      |         |         | 10.500  | 10.000  | 24.6409    | 10.0000  |                                                                  |                         |    |    |   |   |   |
| SGO_1700 | 2.949                  | 8.270                | 0.0006  | 0.0010  | 55.500  | 17.000  | 120.9579   | 17.6921  | enoyl-CoA hydratase/isomerase family protein                     |                         |    |    |   |   |   |
|          |                        |                      |         |         | 65.000  | 17.500  | 152.5392   | 17.5000  |                                                                  |                         |    |    |   |   |   |
| SGO_1701 | 0.868                  | 7.787                | 0.0013  | 0.0027  | 30.000  | 36.500  | 65.3827    | 37.9859  | aspartate kinase                                                 |                         |    |    |   |   |   |
|          |                        |                      |         |         | 33.000  | 40.000  | 77.4430    | 40.0000  |                                                                  |                         |    |    |   |   |   |
| SGO_1708 | -2.226                 | 9.714                | 0.0047  | 0.0146  | 36.500  | 424.000 | 79.5489    | 441.2609 | amiF; Oligopeptide transport ATP-binding protein amiF            |                         |    |    |   |   |   |
|          |                        |                      |         |         | 27.500  | 254.500 | 64.5358    | 254.5000 |                                                                  |                         |    |    |   |   |   |
| SGO_1709 | -3.054                 | 9.803                | 0.0000  | 0.0000  | 20.000  | 381.500 | 43.5884    | 397.0307 | amiE; Oligopeptide transport ATP-binding protein                 |                         |    |    |   |   |   |
|          |                        |                      |         |         | 22.500  | 400.000 | 52.8020    | 400.0000 |                                                                  |                         |    |    |   |   |   |

- Show detected proteins only  
 Show all proteins

Proteins found:  
769

Filter by category:

ABC Transporter

Test

Cutoff

q-Value

.005

p-Value

|             | Signif | Direction | Applies To   |
|-------------|--------|-----------|--------------|
| Red         | yes    | +         | ratios, bars |
| Yellow      | no     | n/a       | bars         |
| Green       | yes    | -         | ratios, bars |
| Pink        | yes    | +         | p-, q-Values |
| Light Green | yes    | -         | p-, q-Values |

Dot Plots Dot Plots

Summary Table

SgFn vs Sg

SgPg vs Sg

SgPgFn vs Sg

SgPg vs SgFn

SgPgFn vs SgFn

SgPgFn vs SgPg

Coverage

SgFn vs Sg

Raw

Normalized

Log<sub>2</sub> Ratios

| Protein  | SgFn vs Sg             |                      |         |         | Raw     |         | Normalized |          | Description                                                     | Log <sub>2</sub> Ratios |    |    |   |   |   |   |
|----------|------------------------|----------------------|---------|---------|---------|---------|------------|----------|-----------------------------------------------------------------|-------------------------|----|----|---|---|---|---|
|          | Log <sub>2</sub> Ratio | Log <sub>2</sub> Sum | q-Value | p-Value | SgFn    | Sg      | SgFn       | Sg       |                                                                 | -6                      | -4 | -2 | 0 | 2 | 4 | 6 |
| SGO_1711 | -2.691                 | 8.366                | 0.0007  | 0.0012  | 10.500  | 121.000 | 22.8839    | 125.9259 | hppB; Oligopeptide transport system permease                    |                         |    |    |   |   |   |   |
|          |                        |                      |         |         | 9.000   | 160.000 | 21.1208    | 160.0000 |                                                                 |                         |    |    |   |   |   |   |
| SGO_1712 | -1.923                 | 10.854               | 0.0003  | 0.0003  | 111.000 | 712.500 | 241.9158   | 741.5056 | hppA; oligopeptide-binding lipoprotein                          |                         |    |    |   |   |   |   |
|          |                        |                      |         |         | 65.000  | 715.500 | 152.5392   | 715.5000 |                                                                 |                         |    |    |   |   |   |   |
| SGO_1713 | -1.214                 | 10.762               | 0.0008  | 0.0013  | 137.500 | 615.000 | 299.6705   | 640.0364 | hppG; oligopeptide-binding lipoprotein                          |                         |    |    |   |   |   |   |
|          |                        |                      |         |         | 96.500  | 570.500 | 226.4620   | 570.5000 |                                                                 |                         |    |    |   |   |   |   |
| SGO_1715 | -1.347                 | 9.552                | 0.0001  | 0.0000  | 51.000  | 263.500 | 111.1505   | 274.2270 | hppH; oligopeptide-binding lipoprotein                          |                         |    |    |   |   |   |   |
|          |                        |                      |         |         | 43.000  | 264.500 | 100.9105   | 264.5000 |                                                                 |                         |    |    |   |   |   |   |
| SGO_1716 | -0.893                 | 9.573                | 0.0026  | 0.0072  | 70.000  | 215.000 | 152.5595   | 223.7526 | oligopeptide binding protein                                    |                         |    |    |   |   |   |   |
|          |                        |                      |         |         | 49.000  | 270.500 | 114.9911   | 270.5000 |                                                                 |                         |    |    |   |   |   |   |
| SGO_1717 | -2.333                 | 6.693                | 0.0016  | 0.0037  | 3.500   | 48.500  | 7.6280     | 50.4744  | pbp3; penicillin-binding protein 3                              |                         |    |    |   |   |   |   |
|          |                        |                      |         |         | 4.000   | 36.000  | 9.3870     | 36.0000  |                                                                 |                         |    |    |   |   |   |   |
| SGO_1718 | -0.376                 | 7.137                | 0.0406  | 0.2227  | 11.000  | 31.000  | 23.9736    | 32.2620  | sufB-1; FeS assembly protein SufB                               |                         |    |    |   |   |   |   |
|          |                        |                      |         |         | 16.000  | 47.000  | 37.5481    | 47.0000  |                                                                 |                         |    |    |   |   |   |   |
| SGO_1721 | 0.391                  | 7.322                | 0.0192  | 0.0878  | 24.000  | 36.500  | 52.3061    | 37.9859  | sufD; FeS assembly protein SufD                                 |                         |    |    |   |   |   |   |
|          |                        |                      |         |         | 16.500  | 31.000  | 38.7215    | 31.0000  |                                                                 |                         |    |    |   |   |   |   |
| SGO_1722 | 0.722                  | 6.904                | 0.0017  | 0.0039  | 18.000  | 19.500  | 39.2296    | 20.2938  | sufC; FeS assembly ATPase SufC                                  |                         |    |    |   |   |   |   |
|          |                        |                      |         |         | 15.000  | 25.000  | 35.2014    | 25.0000  |                                                                 |                         |    |    |   |   |   |   |
| SGO_1724 | 0.591                  | 4.101                | 0.0794  | 0.4935  |         | 3.000   |            | 3.1221   | mecA; Adapter protein mec                                       |                         |    |    |   |   |   |   |
|          |                        |                      |         |         | 3.000   | 7.000   | 7.0403     | 7.0000   |                                                                 |                         |    |    |   |   |   |   |
| SGO_1727 | -1.722                 | 7.502                | 0.0003  | 0.0003  | 11.500  | 64.500  | 25.0634    | 67.1258  | amino acid ABC transporter, amino acid-binding/permease protein |                         |    |    |   |   |   |   |
|          |                        |                      |         |         | 7.500   | 71.500  | 17.6007    | 71.5000  |                                                                 |                         |    |    |   |   |   |   |
| SGO_1728 | -0.925                 | 7.589                | 0.0068  | 0.0241  | 14.500  | 73.000  | 31.6016    | 75.9718  | glnQ; glutamine ABC transporter ATP-binding protein             |                         |    |    |   |   |   |   |
|          |                        |                      |         |         | 14.500  | 51.000  | 34.0280    | 51.0000  |                                                                 |                         |    |    |   |   |   |   |

- Show detected proteins only  
 Show all proteins

Proteins found:  
769

Filter by category:

ABC Transporter

Test

Cutoff

q-Value

.005

p-Value

|             | Signif | Direction | Applies To   |
|-------------|--------|-----------|--------------|
| Red         | yes    | +         | ratios, bars |
| Yellow      | no     | n/a       | bars         |
| Green       | yes    | -         | ratios, bars |
| Pink        | yes    | +         | p-, q-Values |
| Light Green | yes    | -         | p-, q-Values |

Dot Plots Dot Plots

Summary Table

SgFn vs Sg

SgPg vs Sg

SgPgFn vs Sg

SgPg vs SgFn

SgPgFn vs SgFn

SgPgFn vs SgPg

Coverage

SgFn vs Sg

Raw

Normalized

Log<sub>2</sub> Ratios

| Protein  | SgFn vs Sg             |                      |         |         | Raw     |         | Normalized |          | Description                                              | Log <sub>2</sub> Ratios |    |    |   |   |   |   |
|----------|------------------------|----------------------|---------|---------|---------|---------|------------|----------|----------------------------------------------------------|-------------------------|----|----|---|---|---|---|
|          | Log <sub>2</sub> Ratio | Log <sub>2</sub> Sum | q-Value | p-Value | SgFn    | Sg      | SgFn       | Sg       |                                                          | -6                      | -4 | -2 | 0 | 2 | 4 | 6 |
| SGO_1730 | 0.138                  | 10.208               | 0.0639  | 0.3830  | 163.500 | 292.500 | 356.3355   | 304.4076 | SPFH domain/Band 7 family                                |                         |    |    |   |   |   |   |
|          |                        |                      |         |         | 113.000 | 256.500 | 265.1835   | 256.5000 |                                                          |                         |    |    |   |   |   |   |
| SGO_1731 | 0.649                  | 4.113                | 0.0366  | 0.1959  | 2.000   | 2.000   | 4.3588     | 2.0814   | DNA-binding response regulator                           |                         |    |    |   |   |   |   |
|          |                        |                      |         |         | 2.500   | 5.000   | 5.8669     | 5.0000   |                                                          |                         |    |    |   |   |   |   |
| SGO_1735 | -0.145                 | 9.384                | 0.0589  | 0.3452  | 82.500  | 155.500 | 179.8023   | 161.8303 | hypothetical protein SGO_1735                            |                         |    |    |   |   |   |   |
|          |                        |                      |         |         | 59.000  | 188.000 | 138.4587   | 188.0000 |                                                          |                         |    |    |   |   |   |   |
| SGO_1736 | 1.192                  | 6.293                | 0.0068  | 0.0244  | 15.500  | 12.500  | 33.7810    | 13.0089  | alkaline shock protein                                   |                         |    |    |   |   |   |   |
|          |                        |                      |         |         | 9.000   | 10.500  | 21.1208    | 10.5000  |                                                          |                         |    |    |   |   |   |   |
| SGO_1738 | -0.253                 | 4.817                | 0.0847  | 0.5362  |         | 11.500  |            | 11.9682  | hypothetical protein SGO_1738                            |                         |    |    |   |   |   |   |
|          |                        |                      |         |         | 3.500   | 8.000   | 8.2136     | 8.0000   |                                                          |                         |    |    |   |   |   |   |
| SGO_1739 | -1.358                 | 4.332                | 0.0238  | 0.1138  | 1.500   | 9.000   | 3.2691     | 9.3664   | LytTr DNA-binding domain family                          |                         |    |    |   |   |   |   |
|          |                        |                      |         |         |         | 7.500   |            | 7.5000   |                                                          |                         |    |    |   |   |   |   |
| SGO_1744 | -0.225                 | 4.863                | 0.0260  | 0.1304  | 4.000   | 9.500   | 8.7177     | 9.8867   | ABC transporter, ATP-binding protein SP0636              |                         |    |    |   |   |   |   |
|          |                        |                      |         |         |         | 10.500  |            | 10.5000  |                                                          |                         |    |    |   |   |   |   |
| SGO_1745 | 0.223                  | 11.665               | 0.0272  | 0.1384  | 422.000 | 810.500 | 919.7161   | 843.4951 | fba; fructose-1,6-bisphosphate aldolase, class II        |                         |    |    |   |   |   |   |
|          |                        |                      |         |         | 351.000 | 659.500 | 823.7117   | 659.5000 |                                                          |                         |    |    |   |   |   |   |
| SGO_1748 | -0.482                 | 4.963                | 0.0203  | 0.0936  |         | 11.500  |            | 11.9682  | pyrG; CTP synthase                                       |                         |    |    |   |   |   |   |
|          |                        |                      |         |         | 3.500   | 11.000  | 8.2136     | 11.0000  |                                                          |                         |    |    |   |   |   |   |
| SGO_1749 | 0.564                  | 6.940                | 0.0184  | 0.0837  | 19.500  | 19.000  | 42.4987    | 19.7735  | manA; mannose-6-phosphate isomerase, class I             |                         |    |    |   |   |   |   |
|          |                        |                      |         |         | 13.000  | 30.000  | 30.5078    | 30.0000  |                                                          |                         |    |    |   |   |   |   |
| SGO_1755 | -0.956                 | 6.493                | 0.0018  | 0.0044  | 7.000   | 25.500  | 15.2560    | 26.5381  | scrK; fructokinase                                       |                         |    |    |   |   |   |   |
|          |                        |                      |         |         | 6.500   | 33.000  | 15.2539    | 33.0000  |                                                          |                         |    |    |   |   |   |   |
| SGO_1757 | -0.656                 | 8.406                | 0.0149  | 0.0651  | 38.000  | 84.500  | 82.8180    | 87.9400  | glmS; glucosamine--fructose-6-phosphate aminotransferase |                         |    |    |   |   |   |   |
|          |                        |                      |         |         | 21.500  | 118.000 | 50.4553    | 118.0000 |                                                          |                         |    |    |   |   |   |   |

 Show detected proteins only Show all proteinsProteins found:  
769 Filter by category:

ABC Transporter

Test

Cutoff

q-Value

p-Value

.005

|             | Signif | Direction | Applies To   |
|-------------|--------|-----------|--------------|
| Red         | yes    | +         | ratios, bars |
| Yellow      | no     | n/a       | bars         |
| Green       | yes    | -         | ratios, bars |
| Pink        | yes    | +         | p-, q-Values |
| Light Green | yes    | -         | p-, q-Values |

Dot Plots Dot Plots

Summary Table

SgFn vs Sg

SgPg vs Sg

SgPgFn vs Sg

SgPg vs SgFn

SgPgFn vs SgFn

SgPgFn vs SgPg

Coverage

| Protein  | SgFn vs Sg             |                      |         |         | Raw     |          | Normalized |           | Description                                                   | Log <sub>2</sub> Ratios |    |    |   |   |
|----------|------------------------|----------------------|---------|---------|---------|----------|------------|-----------|---------------------------------------------------------------|-------------------------|----|----|---|---|
|          | Log <sub>2</sub> Ratio | Log <sub>2</sub> Sum | q-Value | p-Value | SgFn    | Sg       | SgFn       | Sg        |                                                               | -6                      | -4 | -2 | 0 | 2 |
| SGO_1763 | -0.583                 | 7.656                | 0.0056  | 0.0188  | 21.000  | 53.000   | 45.7679    | 55.1576   | ABC transporter, substrate-binding protein SP0092             |                         |    |    |   |   |
|          |                        |                      |         |         | 15.000  | 65.500   | 35.2014    | 65.5000   |                                                               |                         |    |    |   |   |
| SGO_1768 | 3.248                  | 6.256                | 0.0004  | 0.0004  | 17.000  | 5.000    | 37.0502    | 5.2035    | glycosyl hydrolase, family 38                                 |                         |    |    |   |   |
|          |                        |                      |         |         | 13.500  | 2.500    | 31.6812    | 2.5000    |                                                               |                         |    |    |   |   |
| SGO_1774 | 1.620                  | 6.691                | 0.0002  | 0.0002  | 18.500  | 11.000   | 40.3193    | 11.4478   | alcohol dehydrogenase, zinc-containing                        |                         |    |    |   |   |
|          |                        |                      |         |         | 16.000  | 14.000   | 37.5481    | 14.0000   |                                                               |                         |    |    |   |   |
| SGO_1780 | 1.231                  | 3.065                |         |         |         |          |            |           | hypothetical protein SGO_1780                                 |                         |    |    |   |   |
|          |                        |                      |         |         | 2.500   | 2.500    | 5.8669     | 2.5000    |                                                               |                         |    |    |   |   |
| SGO_1784 | 0.353                  | 8.245                | 0.0126  | 0.0527  | 42.500  | 57.500   | 92.6254    | 59.8408   | leuS; leucyl-tRNA synthetase                                  |                         |    |    |   |   |
|          |                        |                      |         |         | 33.000  | 73.500   | 77.4430    | 73.5000   |                                                               |                         |    |    |   |   |
| SGO_1792 | 0.124                  | 2.648                |         |         | 1.500   |          | 3.2691     |           | transcription regulator                                       |                         |    |    |   |   |
|          |                        |                      |         |         |         | 3.000    |            | 3.0000    |                                                               |                         |    |    |   |   |
| SGO_1799 | 2.086                  | 9.301                | 0.0001  | 0.0000  | 117.500 | 50.500   | 256.0821   | 52.5558   | endopeptidase O                                               |                         |    |    |   |   |
|          |                        |                      |         |         | 108.000 | 68.500   | 253.4497   | 68.5000   |                                                               |                         |    |    |   |   |
| SGO_1802 | -6.178                 | 11.051               | 0.0003  | 0.0003  | 9.000   | 1088.500 | 19.6148    | 1132.8124 | Metal ABC transporter substrate-binding lipoprotein precursor |                         |    |    |   |   |
|          |                        |                      |         |         | 4.500   | 958.000  | 10.5604    | 958.0000  |                                                               |                         |    |    |   |   |
| SGO_1803 | 1.164                  | 6.483                | 0.0010  | 0.0018  | 15.500  | 13.000   | 33.7810    | 13.5292   | tpx; thioredoxin peroxidase                                   |                         |    |    |   |   |
|          |                        |                      |         |         | 12.000  | 14.000   | 28.1611    | 14.0000   |                                                               |                         |    |    |   |   |
| SGO_1804 | 1.496                  | 4.317                | 0.0079  | 0.0293  | 4.000   |          | 8.7177     |           | hutI; imidazolonepropionase                                   |                         |    |    |   |   |
|          |                        |                      |         |         | 3.500   | 3.000    | 8.2136     | 3.0000    |                                                               |                         |    |    |   |   |
| SGO_1805 | 1.066                  | 2.272                |         |         | 1.500   | 1.500    | 3.2691     | 1.5611    | hutU; urocanate hydratase                                     |                         |    |    |   |   |
|          |                        |                      |         |         |         |          |            |           |                                                               |                         |    |    |   |   |
| SGO_1811 | 1.763                  | 4.707                | 0.0030  | 0.0087  |         | 4.500    |            | 4.6832    | hutH; histidine ammonia-lyase                                 |                         |    |    |   |   |
|          |                        |                      |         |         | 7.000   | 5.000    | 16.4273    | 5.0000    |                                                               |                         |    |    |   |   |

- Show detected proteins only
- Show all proteins

Proteins found: 769

Filter by category:

ABC Transporter

Test

Cutoff

q-Value

.005

p-Value

|             | Signif | Direction | Applies To   |
|-------------|--------|-----------|--------------|
| Red         | yes    | +         | ratios, bars |
| Yellow      | no     | n/a       | bars         |
| Green       | yes    | -         | ratios, bars |
| Pink        | yes    | +         | p-, q-Values |
| Light Green | yes    | -         | p-, q-Values |

Dot Plots Dot Plots

Summary Table

SgFn vs Sg

SgPg vs Sg

SgPgFn vs Sg

SgPg vs SgFn

SgPgFn vs SgFn

SgPgFn vs SgPg

Coverage

SgFn vs Sg

Raw

Normalized

Log<sub>2</sub> Ratios

| Protein  | SgFn vs Sg             |                      |         |         | Raw     |        | Normalized |         | Description                                                 | Log <sub>2</sub> Ratios |    |    |   |   |   |   |
|----------|------------------------|----------------------|---------|---------|---------|--------|------------|---------|-------------------------------------------------------------|-------------------------|----|----|---|---|---|---|
|          | Log <sub>2</sub> Ratio | Log <sub>2</sub> Sum | q-Value | p-Value | SgFn    | Sg     | SgFn       | Sg      |                                                             | -6                      | -4 | -2 | 0 | 2 | 4 | 6 |
| SGO_1813 | 0.124                  | 3.063                |         |         | 2.000   |        | 4.3588     |         | hutG; formimidoylglutamase                                  |                         |    |    |   |   |   |   |
|          |                        |                      |         |         |         | 4.000  |            | 4.0000  |                                                             |                         |    |    |   |   |   |   |
| SGO_1814 | 1.632                  | 5.980                | 0.0028  | 0.0079  | 9.000   | 8.500  | 19.6148    | 8.8460  | putative regulatory protein                                 |                         |    |    |   |   |   |   |
|          |                        |                      |         |         | 12.000  | 6.500  | 28.1611    | 6.5000  |                                                             |                         |    |    |   |   |   |   |
| SGO_1816 | 0.877                  | 5.790                | 0.0044  | 0.0135  | 9.500   | 9.000  | 20.7045    | 9.3664  | scaR; ScaR Manganese-dependent regulator of scaCBA          |                         |    |    |   |   |   |   |
|          |                        |                      |         |         | 6.500   | 10.000 | 15.2539    | 10.0000 |                                                             |                         |    |    |   |   |   |   |
| SGO_1822 | 0.126                  | 7.384                | 0.0609  | 0.3615  | 17.500  | 41.000 | 38.1399    | 42.6691 | relA; GTP diphosphokinase                                   |                         |    |    |   |   |   |   |
|          |                        |                      |         |         | 21.000  | 37.000 | 49.2819    | 37.0000 |                                                             |                         |    |    |   |   |   |   |
| SGO_1824 | 0.490                  | 5.870                | 0.0226  | 0.1071  | 6.500   | 9.500  | 14.1662    | 9.8867  | prmA; ribosomal protein L11 methyltransferase               |                         |    |    |   |   |   |   |
|          |                        |                      |         |         | 8.500   | 14.500 | 19.9474    | 14.5000 |                                                             |                         |    |    |   |   |   |   |
| SGO_1827 | 0.838                  | 5.024                | 0.0259  | 0.1289  | 7.000   | 7.000  | 15.2560    | 7.2850  | hypothetical protein SGO_1827                               |                         |    |    |   |   |   |   |
|          |                        |                      |         |         |         | 10.000 |            | 10.0000 |                                                             |                         |    |    |   |   |   |   |
| SGO_1828 | 0.994                  | 5.002                | 0.0116  | 0.0472  | 6.000   | 6.500  | 13.0765    | 6.7646  | ATPase, AAA family                                          |                         |    |    |   |   |   |   |
|          |                        |                      |         |         | 3.500   | 4.000  | 8.2136     | 4.0000  |                                                             |                         |    |    |   |   |   |   |
| SGO_1834 | 5.178                  | 8.827                | 0.0008  | 0.0014  | 116.000 | 7.000  | 252.8130   | 7.2850  | hypothetical protein SGO_1834                               |                         |    |    |   |   |   |   |
|          |                        |                      |         |         | 80.500  | 5.000  | 188.9139   | 5.0000  |                                                             |                         |    |    |   |   |   |   |
| SGO_1835 | 2.787                  | 4.567                |         |         | 9.500   |        | 20.7045    |         | hypothetical protein SGO_1835                               |                         |    |    |   |   |   |   |
|          |                        |                      |         |         |         | 3.000  |            | 3.0000  |                                                             |                         |    |    |   |   |   |   |
| SGO_1843 | 0.982                  | 8.061                | 0.0002  | 0.0001  | 41.500  | 45.500 | 90.4460    | 47.3523 | pepS; aminopeptidase PepS                                   |                         |    |    |   |   |   |   |
|          |                        |                      |         |         | 37.000  | 42.500 | 86.8300    | 42.5000 |                                                             |                         |    |    |   |   |   |   |
| SGO_1844 | 0.367                  | 5.531                | 0.0241  | 0.1161  | 6.500   | 8.000  | 14.1662    | 8.3257  | cbxX/cfqX family protein                                    |                         |    |    |   |   |   |   |
|          |                        |                      |         |         | 5.000   | 12.000 | 11.7338    | 12.0000 |                                                             |                         |    |    |   |   |   |   |
| SGO_1847 | 0.427                  | 6.251                | 0.0392  | 0.2126  | 7.000   | 14.000 | 15.2560    | 14.5699 | polC; DNA polymerase III, alpha subunit, Gram-positive type |                         |    |    |   |   |   |   |
|          |                        |                      |         |         | 12.500  | 17.000 | 29.3345    | 17.0000 |                                                             |                         |    |    |   |   |   |   |

- Show detected proteins only  
 Show all proteins

Proteins found:  
769

Filter by category:

ABC Transporter

Test

Cutoff

q-Value

.005

p-Value

|             | Signif | Direction | Applies To   |
|-------------|--------|-----------|--------------|
| Red         | yes    | +         | ratios, bars |
| Yellow      | no     | n/a       | bars         |
| Green       | yes    | -         | ratios, bars |
| Pink        | yes    | +         | p-, q-Values |
| Light Green | yes    | -         | p-, q-Values |

Dot Plots Dot Plots



Summary Table

SgFn vs Sg

SgPg vs Sg

SgPgFn vs Sg

SgPg vs SgFn

SgPgFn vs SgFn

SgPgFn vs SgPg

Coverage

SgFn vs Sg

Raw

Normalized

Log<sub>2</sub> Ratios

| Protein  | SgFn vs Sg             |                      |         |         | Raw     |         | Normalized |          | Description                                           | Log <sub>2</sub> Ratios |    |    |   |   |
|----------|------------------------|----------------------|---------|---------|---------|---------|------------|----------|-------------------------------------------------------|-------------------------|----|----|---|---|
|          | Log <sub>2</sub> Ratio | Log <sub>2</sub> Sum | q-Value | p-Value | SgFn    | Sg      | SgFn       | Sg       |                                                       | -6                      | -4 | -2 | 0 | 2 |
| SGO_1851 | 0.331                  | 8.944                | 0.0137  | 0.0588  | 69.500  | 96.500  | 151.4698   | 100.4285 | proS; prolyl-tRNA synthetase                          |                         |    |    |   |   |
|          |                        |                      |         |         | 52.500  | 117.500 | 123.2047   | 117.5000 |                                                       |                         |    |    |   |   |
| SGO_1854 | -1.824                 | 6.877                | 0.0003  | 0.0003  | 5.000   | 45.500  | 10.8971    | 47.3523  | uppS; undecaprenyl diphosphate synthase               |                         |    |    |   |   |
|          |                        |                      |         |         | 6.500   | 44.000  | 15.2539    | 44.0000  |                                                       |                         |    |    |   |   |
| SGO_1856 | 2.577                  | 8.999                | 0.0055  | 0.0181  | 132.500 | 33.500  | 288.7734   | 34.8638  | ATP-dependent proteinase ATP-binding chain            |                         |    |    |   |   |
|          |                        |                      |         |         | 65.000  | 35.500  | 152.5392   | 35.5000  |                                                       |                         |    |    |   |   |
| SGO_1858 | 2.081                  | 4.249                | 0.0188  | 0.0855  | 3.500   |         | 7.6280     |          | beta-fructofuranosidase/sucrose 6 phoshate hydrolase  |                         |    |    |   |   |
|          |                        |                      |         |         | 4.000   | 2.000   | 9.3870     | 2.0000   |                                                       |                         |    |    |   |   |
| SGO_1860 | -0.612                 | 9.299                | 0.0202  | 0.0926  | 74.500  | 204.500 | 162.3669   | 212.8251 | 5'-nucleotidase, lipoprotein e(P4) family             |                         |    |    |   |   |
|          |                        |                      |         |         | 39.000  | 163.000 | 91.5235    | 163.0000 |                                                       |                         |    |    |   |   |
| SGO_1862 | 2.719                  | 8.218                | 0.0003  | 0.0004  | 54.500  | 21.000  | 118.7785   | 21.8549  | alkaline shock protein                                |                         |    |    |   |   |
|          |                        |                      |         |         | 59.500  | 17.500  | 139.6320   | 17.5000  |                                                       |                         |    |    |   |   |
| SGO_1863 | -0.622                 | 8.044                | 0.0044  | 0.0134  | 27.500  | 72.000  | 59.9341    | 74.9311  | efp; Elongation factor P (EF-P)                       |                         |    |    |   |   |
|          |                        |                      |         |         | 19.000  | 84.500  | 44.5884    | 84.5000  |                                                       |                         |    |    |   |   |
| SGO_1864 | 1.965                  | 8.210                | 0.0001  | 0.0001  | 53.000  | 33.500  | 115.5094   | 34.8638  | X-Pro aminopeptidase                                  |                         |    |    |   |   |
|          |                        |                      |         |         | 51.000  | 26.000  | 119.6846   | 26.0000  |                                                       |                         |    |    |   |   |
| SGO_1865 | -0.360                 | 7.560                | 0.0050  | 0.0160  | 17.500  | 48.500  | 38.1399    | 50.4744  | uvrA; excinuclease ABC, A subunit                     |                         |    |    |   |   |
|          |                        |                      |         |         | 19.000  | 55.500  | 44.5884    | 55.5000  |                                                       |                         |    |    |   |   |
| SGO_1867 | -3.307                 | 7.508                | 0.0003  | 0.0003  | 3.000   | 85.000  | 6.5383     | 88.4603  | hypothetical protein SGO_1867                         |                         |    |    |   |   |
|          |                        |                      |         |         | 4.500   | 76.500  | 10.5604    | 76.5000  |                                                       |                         |    |    |   |   |
| SGO_1878 | 0.367                  | 4.391                | 0.0261  | 0.1310  |         | 6.500   |            | 6.7646   | transcriptional regulator, TetR family domain protein |                         |    |    |   |   |
|          |                        |                      |         |         | 3.500   | 6.000   | 8.2136     | 6.0000   |                                                       |                         |    |    |   |   |
| SGO_1879 | 0.354                  | 7.776                | 0.0886  | 0.5656  | 23.500  | 28.000  | 51.2164    | 29.1399  | rpsR; ribosomal protein S18                           |                         |    |    |   |   |
|          |                        |                      |         |         | 28.500  | 72.000  | 66.8826    | 72.0000  |                                                       |                         |    |    |   |   |

- Show detected proteins only  
 Show all proteins

Proteins found:  
769

Filter by category:

ABC Transporter

Test

Cutoff

q-Value

.005

p-Value

|             | Signif | Direction | Applies To   |
|-------------|--------|-----------|--------------|
| Red         | yes    | +         | ratios, bars |
| Yellow      | no     | n/a       | bars         |
| Green       | yes    | -         | ratios, bars |
| Pink        | yes    | +         | p-, q-Values |
| Light Green | yes    | -         | p-, q-Values |

Dot Plots Dot Plots

Summary Table

SgFn vs Sg

SgPg vs Sg

SgPgFn vs Sg

SgPg vs SgFn

SgPgFn vs SgFn

SgPgFn vs SgPg

Coverage

SgFn vs Sg

Raw

Normalized

Log<sub>2</sub> Ratios

| Protein  | SgFn vs Sg             |                      |         |         | Raw     |         | Normalized |          | Description                                | Log <sub>2</sub> Ratios |    |    |   |   |   |   |
|----------|------------------------|----------------------|---------|---------|---------|---------|------------|----------|--------------------------------------------|-------------------------|----|----|---|---|---|---|
|          | Log <sub>2</sub> Ratio | Log <sub>2</sub> Sum | q-Value | p-Value | SgFn    | Sg      | SgFn       | Sg       |                                            | -6                      | -4 | -2 | 0 | 2 | 4 | 6 |
| SGO_1880 | -0.115                 | 7.779                | 0.0501  | 0.2847  | 24.000  | 49.000  | 52.3061    | 50.9948  | ssb-1; single-strand binding protein       |                         |    |    |   |   |   |   |
|          |                        |                      |         |         | 22.500  | 63.500  | 52.8020    | 63.5000  |                                            |                         |    |    |   |   |   |   |
| SGO_1881 | -0.382                 | 9.153                | 0.0271  | 0.1376  | 44.500  | 146.500 | 96.9843    | 152.4640 | rpsF; ribosomal protein S6                 |                         |    |    |   |   |   |   |
|          |                        |                      |         |         | 65.500  | 166.000 | 153.7126   | 166.0000 |                                            |                         |    |    |   |   |   |   |
| SGO_1882 | 1.171                  | 5.749                | 0.0060  | 0.0204  | 10.000  | 6.000   | 21.7942    | 6.2443   | folE; GTP cyclohydrolase I                 |                         |    |    |   |   |   |   |
|          |                        |                      |         |         | 6.500   | 10.500  | 15.2539    | 10.5000  |                                            |                         |    |    |   |   |   |   |
| SGO_1885 | 3.284                  | 12.092               | 0.0000  | 0.0000  | 909.500 | 198.500 | 1982.1843  | 206.5809 | groL; 60 kDa chaperonin/groEL protein      |                         |    |    |   |   |   |   |
|          |                        |                      |         |         | 842.500 | 200.000 | 1977.1427  | 200.0000 |                                            |                         |    |    |   |   |   |   |
| SGO_1886 | 1.601                  | 7.386                | 0.0137  | 0.0590  | 17.500  | 20.000  | 38.1399    | 20.8142  | groES; chaperonin, 10 kDa                  |                         |    |    |   |   |   |   |
|          |                        |                      |         |         | 38.500  | 18.000  | 90.3501    | 18.0000  |                                            |                         |    |    |   |   |   |   |
| SGO_1892 | 2.240                  | 8.409                | 0.0031  | 0.0089  | 79.000  | 24.500  | 172.1743   | 25.4974  | PTS system, fructose(mannose)-specific IIB |                         |    |    |   |   |   |   |
|          |                        |                      |         |         | 46.500  | 33.000  | 109.1242   | 33.0000  |                                            |                         |    |    |   |   |   |   |
| SGO_1898 | 2.530                  | 9.291                | 0.0004  | 0.0005  | 111.500 | 42.000  | 243.0056   | 43.7098  | glutamyl aminopeptidase                    |                         |    |    |   |   |   |   |
|          |                        |                      |         |         | 124.000 | 48.500  | 290.9979   | 48.5000  |                                            |                         |    |    |   |   |   |   |
| SGO_1901 | -0.053                 | 6.001                | 0.1383  | 0.9288  | 10.000  | 17.000  | 21.7942    | 17.6921  | tRNA binding domain                        |                         |    |    |   |   |   |   |
|          |                        |                      |         |         | 4.500   | 14.000  | 10.5604    | 14.0000  |                                            |                         |    |    |   |   |   |   |
| SGO_1903 | 0.470                  | 8.382                | 0.0109  | 0.0434  | 51.000  | 64.000  | 111.1505   | 66.6054  | ATP-dependent Zn protease                  |                         |    |    |   |   |   |   |
|          |                        |                      |         |         | 35.500  | 72.500  | 83.3099    | 72.5000  |                                            |                         |    |    |   |   |   |   |
| SGO_1912 | 2.439                  | 4.026                | 0.0117  | 0.0484  |         | 1.500   |            | 1.5611   | Bifunctional folate synthesis protein      |                         |    |    |   |   |   |   |
|          |                        |                      |         |         | 5.000   | 3.000   | 11.7338    | 3.0000   |                                            |                         |    |    |   |   |   |   |
| SGO_1914 | 1.677                  | 4.472                | 0.0060  | 0.0203  | 4.500   |         | 9.8074     |          | folP; dihydropteroate synthase             |                         |    |    |   |   |   |   |
|          |                        |                      |         |         | 4.000   | 3.000   | 9.3870     | 3.0000   |                                            |                         |    |    |   |   |   |   |
| SGO_1916 | 0.061                  | 8.349                | 0.0764  | 0.4729  | 37.500  | 70.500  | 81.7283    | 73.3700  | ackA; acetate kinase                       |                         |    |    |   |   |   |   |
|          |                        |                      |         |         | 36.000  | 86.500  | 84.4832    | 86.5000  |                                            |                         |    |    |   |   |   |   |

- Show detected proteins only  
 Show all proteins

Proteins found:  
769

Filter by category:

ABC Transporter

Test

Cutoff

q-Value

.005

p-Value

|             | Signif | Direction | Applies To   |
|-------------|--------|-----------|--------------|
| Red         | yes    | +         | ratios, bars |
| Yellow      | no     | n/a       | bars         |
| Green       | yes    | -         | ratios, bars |
| Pink        | yes    | +         | p-, q-Values |
| Light Green | yes    | -         | p-, q-Values |

Dot Plots Dot Plots

Summary Table

SgFn vs Sg

SgPg vs Sg

SgPgFn vs Sg

SgPg vs SgFn

SgPgFn vs SgFn

SgPgFn vs SgPg

Coverage

SgFn vs Sg

Raw

Normalized

Log<sub>2</sub> Ratios

| Protein  | SgFn vs Sg             |                      |         |         | Raw     |         | Normalized |          | Description                                              | Log <sub>2</sub> Ratios |    |    |   |   |
|----------|------------------------|----------------------|---------|---------|---------|---------|------------|----------|----------------------------------------------------------|-------------------------|----|----|---|---|
|          | Log <sub>2</sub> Ratio | Log <sub>2</sub> Sum | q-Value | p-Value | SgFn    | Sg      | SgFn       | Sg       |                                                          | -6                      | -4 | -2 | 0 | 2 |
| SGO_1917 | 0.787                  | 5.009                | 0.0052  | 0.0167  | 4.000   | 6.000   | 8.7177     | 6.2443   | hypothetical protein SGO_1917                            |                         |    |    |   |   |
|          |                        |                      |         |         | 5.000   | 5.500   | 11.7338    | 5.5000   |                                                          |                         |    |    |   |   |
| SGO_1926 | -0.191                 | 10.388               | 0.0027  | 0.0076  | 146.500 | 333.500 | 319.2853   | 347.0767 | rpoC; DNA-directed RNA polymerase, beta chain            |                         |    |    |   |   |
|          |                        |                      |         |         | 130.500 | 367.000 | 306.2518   | 367.0000 |                                                          |                         |    |    |   |   |
| SGO_1927 | -0.581                 | 10.200               | 0.0164  | 0.0731  | 141.000 | 347.000 | 307.2985   | 361.1262 | rpoB; DNA-directed RNA polymerase, beta subunit          |                         |    |    |   |   |
|          |                        |                      |         |         | 74.500  | 333.000 | 174.8334   | 333.0000 |                                                          |                         |    |    |   |   |
| SGO_1929 | -0.009                 | 8.729                | 0.1251  | 0.8259  | 48.000  | 97.000  | 104.6123   | 100.9488 | tyrS; tyrosyl-tRNA synthetase                            |                         |    |    |   |   |
|          |                        |                      |         |         | 45.500  | 112.000 | 106.7774   | 112.0000 |                                                          |                         |    |    |   |   |
| SGO_1936 | -3.425                 | 8.816                | 0.0000  | 0.0000  | 9.000   | 193.500 | 19.6148    | 201.3773 | adcA; metal-binding (Mn) permease precursor, lipoprotein |                         |    |    |   |   |
|          |                        |                      |         |         | 8.000   | 211.000 | 18.7741    | 211.0000 |                                                          |                         |    |    |   |   |
| SGO_1957 | -0.388                 | 5.582                | 0.0561  | 0.3268  | 3.500   | 9.000   | 7.6280     | 9.3664   | hypothetical protein SGO_1957                            |                         |    |    |   |   |
|          |                        |                      |         |         | 5.500   | 18.000  | 12.9072    | 18.0000  |                                                          |                         |    |    |   |   |
| SGO_1958 | -1.095                 | 8.424                | 0.0024  | 0.0066  | 27.500  | 127.000 | 59.9341    | 132.1701 | rplQ; ribosomal protein L17                              |                         |    |    |   |   |
|          |                        |                      |         |         | 21.000  | 102.000 | 49.2819    | 102.0000 |                                                          |                         |    |    |   |   |
| SGO_1959 | 0.029                  | 9.157                | 0.1289  | 0.8527  | 61.000  | 152.000 | 132.9447   | 158.1879 | rpoA; DNA-directed RNA polymerase, alpha subunit         |                         |    |    |   |   |
|          |                        |                      |         |         | 66.000  | 125.000 | 154.8860   | 125.0000 |                                                          |                         |    |    |   |   |
| SGO_1960 | -0.204                 | 7.854                | 0.0710  | 0.4360  | 30.500  | 64.500  | 66.4724    | 67.1258  | rpsK; ribosomal protein S11                              |                         |    |    |   |   |
|          |                        |                      |         |         | 18.000  | 55.500  | 42.2416    | 55.5000  |                                                          |                         |    |    |   |   |
| SGO_1961 | -1.173                 | 8.386                | 0.0006  | 0.0010  | 27.000  | 115.500 | 58.8444    | 120.2020 | rpsM; ribosomal protein S13p/S18e                        |                         |    |    |   |   |
|          |                        |                      |         |         | 19.000  | 111.000 | 44.5884    | 111.0000 |                                                          |                         |    |    |   |   |
| SGO_1964 | -0.394                 | 8.593                | 0.0246  | 0.1193  | 47.500  | 106.500 | 103.5225   | 110.8356 | adk; Adenylate kinase (ATP-AMP transphosphorylase)       |                         |    |    |   |   |
|          |                        |                      |         |         | 28.000  | 106.000 | 65.7092    | 106.0000 |                                                          |                         |    |    |   |   |
| SGO_1966 | 0.711                  | 8.581                | 0.0250  | 0.1218  | 75.000  | 64.500  | 163.4567   | 67.1258  | rplO; ribosomal protein L15                              |                         |    |    |   |   |
|          |                        |                      |         |         | 34.000  | 72.500  | 79.7897    | 72.5000  |                                                          |                         |    |    |   |   |

- Show detected proteins only  
 Show all proteins

Proteins found:  
769

Filter by category:

ABC Transporter

Test

Cutoff

q-Value

.005

p-Value

|             | Signif | Direction | Applies To   |
|-------------|--------|-----------|--------------|
| Red         | yes    | +         | ratios, bars |
| Yellow      | no     | n/a       | bars         |
| Green       | yes    | -         | ratios, bars |
| Pink        | yes    | +         | p-, q-Values |
| Light Green | yes    | -         | p-, q-Values |

Dot Plots Dot Plots

Summary Table

SgFn vs Sg

SgPg vs Sg

SgPgFn vs Sg

SgPg vs SgFn

SgPgFn vs SgFn

SgPgFn vs SgPg

Coverage

| Protein  | SgFn vs Sg             |                      |         |         | Raw     |         | Normalized |          | Description                                | Log <sub>2</sub> Ratios |    |    |   |   |
|----------|------------------------|----------------------|---------|---------|---------|---------|------------|----------|--------------------------------------------|-------------------------|----|----|---|---|
|          | Log <sub>2</sub> Ratio | Log <sub>2</sub> Sum | q-Value | p-Value | SgFn    | Sg      | SgFn       | Sg       |                                            | -6                      | -4 | -2 | 0 | 2 |
| SGO_1967 | -0.238                 | 7.392                | 0.0767  | 0.4756  | 13.000  | 42.000  | 28.3325    | 43.7098  | 50S ribosomal protein L30 -related protein |                         |    |    |   |   |
|          |                        |                      |         |         | 21.500  | 45.500  | 50.4553    | 45.5000  |                                            |                         |    |    |   |   |
| SGO_1968 | -0.621                 | 9.665                | 0.0078  | 0.0289  | 84.000  | 264.500 | 183.0714   | 275.2677 | rpsE; ribosomal protein S5                 |                         |    |    |   |   |
|          |                        |                      |         |         | 58.500  | 216.000 | 137.2853   | 216.0000 |                                            |                         |    |    |   |   |
| SGO_1969 | -0.461                 | 9.203                | 0.0251  | 0.1230  | 71.000  | 182.000 | 154.7390   | 189.4092 | rplR; ribosomal protein L18                |                         |    |    |   |   |
|          |                        |                      |         |         | 41.000  | 149.000 | 96.2170    | 149.0000 |                                            |                         |    |    |   |   |
| SGO_1970 | -1.812                 | 9.837                | 0.0001  | 0.0001  | 52.000  | 349.000 | 113.3299   | 363.2077 | BL10; 50S ribosomal protein L6             |                         |    |    |   |   |
|          |                        |                      |         |         | 38.500  | 347.500 | 90.3501    | 347.5000 |                                            |                         |    |    |   |   |
| SGO_1971 | -0.883                 | 9.958                | 0.0005  | 0.0007  | 79.000  | 326.500 | 172.1743   | 339.7917 | rpsH; ribosomal protein S8                 |                         |    |    |   |   |
|          |                        |                      |         |         | 75.500  | 305.500 | 177.1801   | 305.5000 |                                            |                         |    |    |   |   |
| SGO_1973 | -0.823                 | 9.445                | 0.0007  | 0.0011  | 60.500  | 202.500 | 131.8550   | 210.7437 | BL6; 50S ribosomal protein L5              |                         |    |    |   |   |
|          |                        |                      |         |         | 51.000  | 234.500 | 119.6846   | 234.5000 |                                            |                         |    |    |   |   |
| SGO_1974 | -1.058                 | 8.620                | 0.0046  | 0.0142  | 34.500  | 147.000 | 75.1901    | 152.9843 | rplX; ribosomal protein L24                |                         |    |    |   |   |
|          |                        |                      |         |         | 22.500  | 112.500 | 52.8020    | 112.5000 |                                            |                         |    |    |   |   |
| SGO_1975 | -0.135                 | 8.279                | 0.0814  | 0.5114  | 40.500  | 80.500  | 88.2666    | 83.7771  | rplN; ribosomal protein L14                |                         |    |    |   |   |
|          |                        |                      |         |         | 26.000  | 77.500  | 61.0157    | 77.5000  |                                            |                         |    |    |   |   |
| SGO_1976 | 0.116                  | 7.182                | 0.1315  | 0.8772  | 14.500  | 45.500  | 31.6016    | 47.3523  | BS16; 30S ribosomal protein                |                         |    |    |   |   |
|          |                        |                      |         |         | 18.000  | 24.000  | 42.2416    | 24.0000  |                                            |                         |    |    |   |   |
| SGO_1977 | -0.463                 | 5.951                | 0.0523  | 0.2993  | 7.500   | 25.000  | 16.3457    | 26.0177  | rpmC; ribosomal protein L29                |                         |    |    |   |   |
|          |                        |                      |         |         |         | 19.500  |            | 19.5000  |                                            |                         |    |    |   |   |
| SGO_1978 | -0.239                 | 7.841                | 0.0607  | 0.3602  | 25.000  | 42.500  | 54.4856    | 44.2302  | rplP; ribosomal protein L16                |                         |    |    |   |   |
|          |                        |                      |         |         | 20.500  | 82.500  | 48.1085    | 82.5000  |                                            |                         |    |    |   |   |
| SGO_1979 | -1.001                 | 10.336               | 0.0006  | 0.0010  | 88.500  | 429.000 | 192.8788   | 446.4644 | rpsC; ribosomal protein S3                 |                         |    |    |   |   |
|          |                        |                      |         |         | 102.000 | 414.000 | 239.3692   | 414.0000 |                                            |                         |    |    |   |   |

- Show detected proteins only
- Show all proteins

Proteins found: 769

Filter by category:

ABC Transporter

Test

Cutoff

q-Value

p-Value

.005

| Signif | Direction | Applies To   |
|--------|-----------|--------------|
| yes    | +         | ratios, bars |
| no     | n/a       | bars         |
| yes    | -         | ratios, bars |
| yes    | +         | p-, q-Values |
| yes    | -         | p-, q-Values |

Dot Plots Dot Plots

Summary Table

SgFn vs Sg

SgPg vs Sg

SgPgFn vs Sg

SgPg vs SgFn

SgPgFn vs SgFn

SgPgFn vs SgPg

Coverage

SgFn vs Sg

Raw

Normalized

Log<sub>2</sub> Ratios

| Protein  | SgFn vs Sg             |                      |         |         | Raw     |         | Normalized |          | Description                                                      | Log <sub>2</sub> Ratios |    |    |   |   |   |   |
|----------|------------------------|----------------------|---------|---------|---------|---------|------------|----------|------------------------------------------------------------------|-------------------------|----|----|---|---|---|---|
|          | Log <sub>2</sub> Ratio | Log <sub>2</sub> Sum | q-Value | p-Value | SgFn    | Sg      | SgFn       | Sg       |                                                                  | -6                      | -4 | -2 | 0 | 2 | 4 | 6 |
| SGO_1980 | -0.272                 | 8.907                | 0.0105  | 0.0417  | 53.500  | 134.000 | 116.5991   | 139.4551 | rplV; ribosomal protein L22                                      |                         |    |    |   |   |   |   |
|          |                        |                      |         |         | 43.000  | 123.000 | 100.9105   | 123.0000 |                                                                  |                         |    |    |   |   |   |   |
| SGO_1981 | -0.372                 | 9.339                | 0.0070  | 0.0251  | 64.000  | 159.000 | 139.4830   | 165.4728 | rpsS; ribosomal protein S19                                      |                         |    |    |   |   |   |   |
|          |                        |                      |         |         | 60.500  | 200.500 | 141.9788   | 200.5000 |                                                                  |                         |    |    |   |   |   |   |
| SGO_1982 | 0.174                  | 9.007                | 0.0740  | 0.4556  | 78.500  | 99.500  | 171.0846   | 103.5506 | rplB; ribosomal protein L2                                       |                         |    |    |   |   |   |   |
|          |                        |                      |         |         | 44.500  | 135.500 | 104.4307   | 135.5000 |                                                                  |                         |    |    |   |   |   |   |
| SGO_1983 | -1.445                 | 8.527                | 0.0028  | 0.0079  | 14.500  | 130.000 | 31.6016    | 135.2923 | rplW; ribosomal protein L23                                      |                         |    |    |   |   |   |   |
|          |                        |                      |         |         | 31.500  | 128.000 | 73.9228    | 128.0000 |                                                                  |                         |    |    |   |   |   |   |
| SGO_1984 | 0.348                  | 9.327                | 0.0089  | 0.0341  | 81.500  | 153.000 | 177.6229   | 159.2286 | rplD; ribosomal protein L4/L1 family                             |                         |    |    |   |   |   |   |
|          |                        |                      |         |         | 77.000  | 124.500 | 180.7003   | 124.5000 |                                                                  |                         |    |    |   |   |   |   |
| SGO_1985 | 1.375                  | 9.340                | 0.0021  | 0.0053  | 123.000 | 80.000  | 268.0689   | 83.2568  | rplC; ribosomal protein L3                                       |                         |    |    |   |   |   |   |
|          |                        |                      |         |         | 85.500  | 96.000  | 200.6477   | 96.0000  |                                                                  |                         |    |    |   |   |   |   |
| SGO_1986 | -0.327                 | 7.486                | 0.0238  | 0.1144  | 19.000  | 56.000  | 41.4090    | 58.2797  | rpsJ; ribosomal protein S10                                      |                         |    |    |   |   |   |   |
|          |                        |                      |         |         | 16.000  | 42.000  | 37.5481    | 42.0000  |                                                                  |                         |    |    |   |   |   |   |
| SGO_1988 | 1.168                  | 5.598                | 0.0404  | 0.2208  |         | 7.000   |            | 7.2850   | hydrolase, haloacid dehalogenase-like family                     |                         |    |    |   |   |   |   |
|          |                        |                      |         |         | 10.500  | 16.500  | 24.6409    | 16.5000  |                                                                  |                         |    |    |   |   |   |   |
| SGO_1989 | 0.601                  | 9.267                | 0.0015  | 0.0034  | 89.500  | 109.500 | 195.0583   | 113.9577 | purA; adenylosuccinate synthetase                                |                         |    |    |   |   |   |   |
|          |                        |                      |         |         | 75.000  | 131.000 | 176.0068   | 131.0000 |                                                                  |                         |    |    |   |   |   |   |
| SGO_1990 | 3.661                  | 6.835                | 0.0005  | 0.0008  | 21.500  | 3.000   | 46.8576    | 3.1221   | glutamate--cysteine ligase, putative/amino acid ligase, putative |                         |    |    |   |   |   |   |
|          |                        |                      |         |         | 25.000  | 5.500   | 58.6689    | 5.5000   |                                                                  |                         |    |    |   |   |   |   |
| SGO_1991 | 2.067                  | 6.131                | 0.0009  | 0.0016  | 12.500  | 4.000   | 27.2428    | 4.1628   | hsI0; 33 kDa chaperonin /Heat shock protein 33-like protein      |                         |    |    |   |   |   |   |
|          |                        |                      |         |         | 12.000  | 10.500  | 28.1611    | 10.5000  |                                                                  |                         |    |    |   |   |   |   |
| SGO_1993 | -1.499                 | 6.875                | 0.0024  | 0.0063  | 7.500   | 35.000  | 16.3457    | 36.4248  | possible transcriptional regulator                               |                         |    |    |   |   |   |   |
|          |                        |                      |         |         | 6.000   | 50.500  | 14.0805    | 50.5000  |                                                                  |                         |    |    |   |   |   |   |

- Show detected proteins only  
 Show all proteins

Proteins found:  
769

Filter by category:

ABC Transporter

Test

Cutoff

q-Value

.005

p-Value

|             | Signif | Direction | Applies To   |
|-------------|--------|-----------|--------------|
| Red         | yes    | +         | ratios, bars |
| Yellow      | no     | n/a       | bars         |
| Green       | yes    | -         | ratios, bars |
| Pink        | yes    | +         | p-, q-Values |
| Light Green | yes    | -         | p-, q-Values |

Dot Plots Dot Plots

Summary Table

SgFn vs Sg

SgPg vs Sg

SgPgFn vs Sg

SgPg vs SgFn

SgPgFn vs SgFn

SgPgFn vs SgPg

Coverage

SgFn vs Sg

Raw

Normalized

Log<sub>2</sub> Ratios

| Protein  | SgFn vs Sg             |                      |         |         | Raw     |         | Normalized |          | Description                                                 | Log <sub>2</sub> Ratios |    |    |   |   |
|----------|------------------------|----------------------|---------|---------|---------|---------|------------|----------|-------------------------------------------------------------|-------------------------|----|----|---|---|
|          | Log <sub>2</sub> Ratio | Log <sub>2</sub> Sum | q-Value | p-Value | SgFn    | Sg      | SgFn       | Sg       |                                                             | -6                      | -4 | -2 | 0 | 2 |
| SGO_1995 | 0.615                  | 5.975                | 0.0425  | 0.2374  | 6.000   | 16.500  | 13.0765    | 17.1717  | MutT/nudix family protein                                   |                         |    |    |   |   |
|          |                        |                      |         |         | 10.500  | 8.000   | 24.6409    | 8.0000   |                                                             |                         |    |    |   |   |
| SGO_1998 | -0.114                 | 7.258                | 0.0299  | 0.1545  | 17.000  | 41.000  | 37.0502    | 42.6691  | clpB; ATP-dependent Clp proteinase, ATP-binding chain       |                         |    |    |   |   |
|          |                        |                      |         |         | 15.500  | 37.000  | 36.3747    | 37.0000  |                                                             |                         |    |    |   |   |
| SGO_2000 | 0.216                  | 10.871               | 0.0174  | 0.0778  | 247.500 | 443.500 | 539.4069   | 461.5547 | tsf; translation elongation factor Ts                       |                         |    |    |   |   |
|          |                        |                      |         |         | 199.000 | 404.500 | 467.0046   | 404.5000 |                                                             |                         |    |    |   |   |
| SGO_2001 | -0.063                 | 10.783               | 0.0858  | 0.5436  | 180.000 | 455.000 | 392.2960   | 473.5229 | rpsB; ribosomal protein S2                                  |                         |    |    |   |   |
|          |                        |                      |         |         | 200.500 | 425.500 | 470.5248   | 425.5000 |                                                             |                         |    |    |   |   |
| SGO_2004 | -2.079                 | 7.088                | 0.0011  | 0.0023  | 5.000   | 46.000  | 10.8971    | 47.8726  | LPXTG cell wall surface protein                             |                         |    |    |   |   |
|          |                        |                      |         |         | 6.500   | 62.000  | 15.2539    | 62.0000  |                                                             |                         |    |    |   |   |
| SGO_2005 | -5.995                 | 9.561                | 0.0089  | 0.0340  |         | 379.000 |            | 394.4289 | LPXTG cell wall surface protein                             |                         |    |    |   |   |
|          |                        |                      |         |         | 2.500   | 355.000 | 5.8669     | 355.0000 |                                                             |                         |    |    |   |   |
| SGO_2007 | 0.413                  | 7.410                | 0.0001  | 0.0001  | 22.500  | 35.500  | 49.0370    | 36.9452  | nusG; transcription termination/antitermination factor NusG |                         |    |    |   |   |
|          |                        |                      |         |         | 20.500  | 36.000  | 48.1085    | 36.0000  |                                                             |                         |    |    |   |   |
| SGO_2010 | -1.834                 | 6.616                | 0.0002  | 0.0002  | 4.500   | 38.500  | 9.8074     | 40.0673  | pbp2a; penicillin-binding protein 2A                        |                         |    |    |   |   |
|          |                        |                      |         |         | 5.000   | 36.500  | 11.7338    | 36.5000  |                                                             |                         |    |    |   |   |
| SGO_2013 | -5.238                 | 9.019                | 0.0000  | 0.0000  | 2.500   | 248.500 | 5.4486     | 258.6163 | putative N-acetylmuramidase/lysin                           |                         |    |    |   |   |
|          |                        |                      |         |         | 3.500   | 246.500 | 8.2136     | 246.5000 |                                                             |                         |    |    |   |   |
| SGO_2033 | 0.426                  | 8.356                | 0.0017  | 0.0041  | 41.000  | 69.500  | 89.3563    | 72.3293  | nrdD; ribonucleoside-triphosphate reductase                 |                         |    |    |   |   |
|          |                        |                      |         |         | 42.000  | 67.500  | 98.5638    | 67.5000  |                                                             |                         |    |    |   |   |
| SGO_2034 | -1.249                 | 5.669                | 0.0365  | 0.1951  | 4.000   | 16.500  | 8.7177     | 17.1717  | hypothetical protein SGO_2034                               |                         |    |    |   |   |
|          |                        |                      |         |         |         | 25.000  |            | 25.0000  |                                                             |                         |    |    |   |   |
| SGO_2037 | -0.611                 | 6.209                | 0.0059  | 0.0199  | 5.500   | 21.500  | 11.9868    | 22.3753  | cardiolipin synthase                                        |                         |    |    |   |   |
|          |                        |                      |         |         | 7.500   | 22.000  | 17.6007    | 22.0000  |                                                             |                         |    |    |   |   |

- Show detected proteins only  
 Show all proteins

Proteins found:  
769

Filter by category:

ABC Transporter

Test

Cutoff

q-Value

.005

p-Value

|             | Signif | Direction | Applies To   |
|-------------|--------|-----------|--------------|
| Red         | yes    | +         | ratios, bars |
| Yellow      | no     | n/a       | bars         |
| Green       | yes    | -         | ratios, bars |
| Pink        | yes    | +         | p-, q-Values |
| Light Green | yes    | -         | p-, q-Values |

Dot Plots Dot Plots

Summary Table

SgFn vs Sg

SgPg vs Sg

SgPgFn vs Sg

SgPg vs SgFn

SgPgFn vs SgFn

SgPgFn vs SgPg

Coverage

| Protein  | SgFn vs Sg             |                      |         |         | Raw     |         | Normalized |          | Description                                                | Log <sub>2</sub> Ratios |    |    |   |   |   |   |
|----------|------------------------|----------------------|---------|---------|---------|---------|------------|----------|------------------------------------------------------------|-------------------------|----|----|---|---|---|---|
|          | Log <sub>2</sub> Ratio | Log <sub>2</sub> Sum | q-Value | p-Value | SgFn    | Sg      | SgFn       | Sg       |                                                            | -6                      | -4 | -2 | 0 | 2 | 4 | 6 |
| SGO_2042 | 0.631                  | 7.574                | 0.0260  | 0.1299  | 35.000  | 40.500  | 76.2798    | 42.1487  | Bacterial protein of unknown function (DUF965) superfamily |                         |    |    |   |   |   |   |
|          |                        |                      |         |         | 17.500  | 31.000  | 41.0682    | 31.0000  |                                                            |                         |    |    |   |   |   |   |
| SGO_2045 | -2.332                 | 9.653                | 0.0005  | 0.0006  | 32.000  | 294.500 | 69.7415    | 306.4890 | recA; recA protein                                         |                         |    |    |   |   |   |   |
|          |                        |                      |         |         | 27.000  | 365.500 | 63.3624    | 365.5000 |                                                            |                         |    |    |   |   |   |   |
| SGO_2046 | 0.441                  | 5.691                | 0.0257  | 0.1271  | 7.000   | 8.000   | 15.2560    | 8.3257   | cinA; competence induced protein                           |                         |    |    |   |   |   |   |
|          |                        |                      |         |         | 6.000   | 14.000  | 14.0805    | 14.0000  |                                                            |                         |    |    |   |   |   |   |
| SGO_2050 | 0.126                  | 3.423                | 0.1429  | 0.9676  |         | 5.000   |            | 5.2035   | ruvA; Holliday junction DNA helicase RuvA                  |                         |    |    |   |   |   |   |
|          |                        |                      |         |         | 1.500   | 2.000   | 3.5201     | 2.0000   |                                                            |                         |    |    |   |   |   |   |
| SGO_2053 | -0.307                 | 6.428                | 0.0257  | 0.1272  | 9.500   | 19.500  | 20.7045    | 20.2938  | DNA mismatch repair protein hexB                           |                         |    |    |   |   |   |   |
|          |                        |                      |         |         | 7.500   | 27.500  | 17.6007    | 27.5000  |                                                            |                         |    |    |   |   |   |   |
| SGO_2056 | 0.988                  | 7.171                | 0.0049  | 0.0156  | 19.000  | 18.500  | 41.4090    | 19.2531  | mutS; DNA mismatch repair protein MutS                     |                         |    |    |   |   |   |   |
|          |                        |                      |         |         | 23.000  | 29.500  | 53.9754    | 29.5000  |                                                            |                         |    |    |   |   |   |   |
| SGO_2058 | 0.776                  | 10.075               | 0.0002  | 0.0001  | 152.500 | 185.500 | 332.3619   | 193.0516 | argS; arginyl-tRNA synthetase                              |                         |    |    |   |   |   |   |
|          |                        |                      |         |         | 148.500 | 204.500 | 348.4934   | 204.5000 |                                                            |                         |    |    |   |   |   |   |
| SGO_2060 | 0.598                  | 7.874                | 0.0093  | 0.0357  | 29.000  | 37.000  | 63.2032    | 38.5063  | aspS-1; aspartyl-tRNA synthetase                           |                         |    |    |   |   |   |   |
|          |                        |                      |         |         | 33.000  | 55.500  | 77.4430    | 55.5000  |                                                            |                         |    |    |   |   |   |   |
| SGO_2062 | 1.266                  | 8.848                | 0.0012  | 0.0025  | 80.500  | 55.000  | 175.4435   | 57.2390  | hisS; histidyl-tRNA synthetase                             |                         |    |    |   |   |   |   |
|          |                        |                      |         |         | 63.500  | 79.000  | 149.0191   | 79.0000  |                                                            |                         |    |    |   |   |   |   |
| SGO_2064 | 1.217                  | 8.670                | 0.0002  | 0.0002  | 67.000  | 54.500  | 146.0213   | 56.7187  | ilvD; dihydroxy-acid dehydratase                           |                         |    |    |   |   |   |   |
|          |                        |                      |         |         | 59.000  | 66.000  | 138.4587   | 66.0000  |                                                            |                         |    |    |   |   |   |   |
| SGO_2066 | -0.335                 | 6.614                | 0.0814  | 0.5094  | 12.500  | 42.000  | 27.2428    | 43.7098  | rpmG; ribosomal protein L33                                |                         |    |    |   |   |   |   |
|          |                        |                      |         |         |         | 27.000  |            | 27.0000  |                                                            |                         |    |    |   |   |   |   |
| SGO_2070 | -0.754                 | 6.302                | 0.0416  | 0.2298  | 8.500   | 12.500  | 18.5251    | 13.0089  | hypothetical protein SGO_2070                              |                         |    |    |   |   |   |   |
|          |                        |                      |         |         | 4.000   | 38.000  | 9.3870     | 38.0000  |                                                            |                         |    |    |   |   |   |   |

- Show detected proteins only
- Show all proteins

Proteins found: 769

Filter by category:

ABC Transporter

Test

Cutoff

q-Value

.005

p-Value

|             | Signif | Direction | Applies To   |
|-------------|--------|-----------|--------------|
| Red         | yes    | +         | ratios, bars |
| Yellow      | no     | n/a       | bars         |
| Green       | yes    | -         | ratios, bars |
| Pink        | yes    | +         | p-, q-Values |
| Light Green | yes    | -         | p-, q-Values |

Dot Plots Dot Plots

Summary Table

SgFn vs Sg

SgPg vs Sg

SgPgFn vs Sg

SgPg vs SgFn

SgPgFn vs SgFn

SgPgFn vs SgPg

Coverage

SgFn vs Sg

Raw

Normalized

Log<sub>2</sub> Ratios

| Protein  | SgFn vs Sg             |                      |         |         | Raw     |          | Normalized |           | Description                                  | Log <sub>2</sub> Ratios |    |    |   |   |   |   |
|----------|------------------------|----------------------|---------|---------|---------|----------|------------|-----------|----------------------------------------------|-------------------------|----|----|---|---|---|---|
|          | Log <sub>2</sub> Ratio | Log <sub>2</sub> Sum | q-Value | p-Value | SgFn    | Sg       | SgFn       | Sg        |                                              | -6                      | -4 | -2 | 0 | 2 | 4 | 6 |
| SGO_2082 | -2.782                 | 5.615                | 0.0263  | 0.1323  | 1.500   | 18.000   | 3.2691     | 18.7328   | lipoprotein, putative                        |                         |    |    |   |   |   |   |
|          |                        |                      |         |         |         | 27.000   |            | 27.0000   |                                              |                         |    |    |   |   |   |   |
| SGO_2084 | 0.089                  | 5.219                | 0.0952  | 0.6113  | 3.500   | 9.500    | 7.6280     | 9.8867    | NAD(P)H dehydrogenase, quinone family        |                         |    |    |   |   |   |   |
|          |                        |                      |         |         | 5.000   | 8.000    | 11.7338    | 8.0000    |                                              |                         |    |    |   |   |   |   |
| SGO_2085 | -0.782                 | 8.011                | 0.0004  | 0.0004  | 22.500  | 75.500   | 49.0370    | 78.5736   | purB; adenylosuccinate lyase                 |                         |    |    |   |   |   |   |
|          |                        |                      |         |         | 19.500  | 84.500   | 45.7618    | 84.5000   |                                              |                         |    |    |   |   |   |   |
| SGO_2098 | 0.507                  | 11.004               | 0.0078  | 0.0287  | 313.000 | 388.500  | 682.1591   | 404.3157  | rpsD; ribosomal protein S4                   |                         |    |    |   |   |   |   |
|          |                        |                      |         |         | 224.500 | 440.000  | 526.8469   | 440.0000  |                                              |                         |    |    |   |   |   |   |
| SGO_2100 | -0.870                 | 6.617                | 0.0014  | 0.0029  | 9.000   | 32.000   | 19.6148    | 33.3027   | ABC transporter substrate-binding protein    |                         |    |    |   |   |   |   |
|          |                        |                      |         |         | 6.500   | 30.000   | 15.2539    | 30.0000   |                                              |                         |    |    |   |   |   |   |
| SGO_2103 | 0.861                  | 3.079                |         |         | 2.500   |          | 5.4486     |           | hydrolase, haloacid dehalogenase-like family |                         |    |    |   |   |   |   |
|          |                        |                      |         |         |         | 3.000    |            | 3.0000    |                                              |                         |    |    |   |   |   |   |
| SGO_2104 | -1.959                 | 9.563                | 0.0003  | 0.0002  | 44.500  | 291.000  | 96.9843    | 302.8465  | srtB; sortase B                              |                         |    |    |   |   |   |   |
|          |                        |                      |         |         | 26.000  | 295.500  | 61.0157    | 295.5000  |                                              |                         |    |    |   |   |   |   |
| SGO_2105 | -1.919                 | 12.653               | 0.0005  | 0.0008  | 303.000 | 2230.000 | 660.3649   | 2320.7824 | abpA; amylase-binding protein AbpA           |                         |    |    |   |   |   |   |
|          |                        |                      |         |         | 291.000 | 2777.000 | 682.9063   | 2777.0000 |                                              |                         |    |    |   |   |   |   |
| SGO_2106 | 0.371                  | 8.552                | 0.0141  | 0.0613  | 55.500  | 79.000   | 120.9579   | 82.2161   | ribose-phosphate diphosphokinase             |                         |    |    |   |   |   |   |
|          |                        |                      |         |         | 39.000  | 80.500   | 91.5235    | 80.5000   |                                              |                         |    |    |   |   |   |   |
| SGO_2133 | -0.914                 | 10.415               | 0.0008  | 0.0014  | 121.000 | 411.000  | 263.7101   | 427.7317  | Cell division protein ftsH-like protein      |                         |    |    |   |   |   |   |
|          |                        |                      |         |         | 90.000  | 462.500  | 211.2081   | 462.5000  |                                              |                         |    |    |   |   |   |   |
| SGO_2134 | 1.391                  | 8.622                | 0.0005  | 0.0008  | 63.500  | 62.500   | 138.3933   | 65.0444   | hpt; hypoxanthine phosphoribosyltransferase  |                         |    |    |   |   |   |   |
|          |                        |                      |         |         | 62.000  | 45.000   | 145.4989   | 45.0000   |                                              |                         |    |    |   |   |   |   |
| SGO_2142 | -0.098                 | 7.739                | 0.0609  | 0.3630  | 22.000  | 48.500   | 47.9473    | 50.4744   | GTP-binding protein                          |                         |    |    |   |   |   |   |
|          |                        |                      |         |         | 23.500  | 60.000   | 55.1488    | 60.0000   |                                              |                         |    |    |   |   |   |   |

- Show detected proteins only  
 Show all proteins

Proteins found:  
769

Filter by category:

ABC Transporter

Test

Cutoff

q-Value

.005

p-Value

|             | Signif | Direction | Applies To   |
|-------------|--------|-----------|--------------|
| Red         | yes    | +         | ratios, bars |
| Yellow      | no     | n/a       | bars         |
| Green       | yes    | -         | ratios, bars |
| Pink        | yes    | +         | p-, q-Values |
| Light Green | yes    | -         | p-, q-Values |

Dot Plots Dot Plots



Summary Table

SgFn vs Sg

SgPg vs Sg

SgPgFn vs Sg

SgPg vs SgFn

SgPgFn vs SgFn

SgPgFn vs SgPg

Coverage

SgFn vs Sg

Raw

Normalized

Log<sub>2</sub> Ratios

| Protein  | SgFn vs Sg             |                      |         |         | Raw    |         | Normalized |          | Description           | Log <sub>2</sub> Ratios |    |    |   |   |   |   |
|----------|------------------------|----------------------|---------|---------|--------|---------|------------|----------|-----------------------|-------------------------|----|----|---|---|---|---|
|          | Log <sub>2</sub> Ratio | Log <sub>2</sub> Sum | q-Value | p-Value | SgFn   | Sg      | SgFn       | Sg       |                       | -6                      | -4 | -2 | 0 | 2 | 4 | 6 |
| SGO_2150 | -0.999                 | 8.352                | 0.0006  | 0.0008  | 27.500 | 108.500 | 59.9341    | 112.9170 | degP; serine protease |                         |    |    |   |   |   |   |
|          |                        |                      |         |         | 21.000 | 104.500 | 49.2819    | 104.5000 |                       |                         |    |    |   |   |   |   |

- Show detected proteins only
- Show all proteins

Proteins found:  
769

Filter by category:

ABC Transporter

Test

Cutoff

q-Value

.005

p-Value

|                                                             | Signif | Direction | Applies To   |
|-------------------------------------------------------------|--------|-----------|--------------|
| <span style="background-color: red; color: white;"> </span> | yes    | +         | ratios, bars |
| <span style="background-color: yellow;"> </span>            | no     | n/a       | bars         |
| <span style="background-color: green;"> </span>             | yes    | -         | ratios, bars |
| <span style="background-color: pink;"> </span>              | yes    | +         | p-, q-Values |
| <span style="background-color: lightgreen;"> </span>        | yes    | -         | p-, q-Values |

Dot Plots Dot Plots
