# Supplementary material for: Proteomics of Streptococcus gordonii within a model developing oral microbial community
Source: PubMed Central journal article supplement (PMC3534352; doi:10.1186/1471-2180-12-211), 2012-09-18
Supplement: 1471-2180-12-211-S3.pdf [file 1471-2180-12-211-S3.pdf]

Summary Table SgFn vs Sg SgPg vs Sg SgPgFn vs Sg SgPg vs SgFn SgPgFn vs SgFn SgPgFn vs SgPg Coverage

| Protein  | SgPg vs Sg             |                      |         |         | Raw     |         | Normalized |          | Description                                          | Log <sub>2</sub> Ratios |    |    |   |   |   |   |
|----------|------------------------|----------------------|---------|---------|---------|---------|------------|----------|------------------------------------------------------|-------------------------|----|----|---|---|---|---|
|          | Log <sub>2</sub> Ratio | Log <sub>2</sub> Sum | q-Value | p-Value | SgPg    | Sg      | SgPg       | Sg       |                                                      | -6                      | -4 | -2 | 0 | 2 | 4 | 6 |
| SGO_0001 | -0.754                 | 7.101                | 0.0159  | 0.0586  | 19.000  | 32.000  | 28.3302    | 33.3027  | dnaA; chromosomal replication initiator protein DnaA |                         |    |    |   |   |   |   |
|          |                        |                      |         |         | 15.500  | 53.500  | 22.1215    | 53.5000  |                                                      |                         |    |    |   |   |   |   |
| SGO_0002 | 0.550                  | 7.204                | 0.0242  | 0.0969  | 30.000  | 21.000  | 44.7319    | 21.8549  | dnaN; DNA polymerase III, beta subunit               |                         |    |    |   |   |   |   |
|          |                        |                      |         |         | 29.000  | 39.500  | 41.3886    | 39.5000  |                                                      |                         |    |    |   |   |   |   |
| SGO_0004 | -1.979                 | 8.713                | 0.0019  | 0.0040  | 36.500  | 137.000 | 54.4238    | 142.5772 | putative lipoprotein                                 |                         |    |    |   |   |   |   |
|          |                        |                      |         |         | 22.500  | 190.500 | 32.1119    | 190.5000 |                                                      |                         |    |    |   |   |   |   |
| SGO_0005 |                        | 4.640                |         |         |         | 10.500  |            | 10.9275  | hypothetical protein SGO_0005                        |                         |    |    |   |   |   |   |
|          |                        |                      |         |         |         | 14.000  |            | 14.0000  |                                                      |                         |    |    |   |   |   |   |
| SGO_0006 | 0.462                  | 7.817                | 0.0017  | 0.0033  | 46.000  | 44.000  | 68.5889    | 45.7912  | ABC transporter, ATP-binding protein                 |                         |    |    |   |   |   |   |
|          |                        |                      |         |         | 43.500  | 49.000  | 62.0829    | 49.0000  |                                                      |                         |    |    |   |   |   |   |
| SGO_0007 | 1.153                  | 6.977                | 0.0003  | 0.0002  | 29.000  | 17.000  | 43.2408    | 17.6921  | trpS; tryptophanyl-tRNA synthetase                   |                         |    |    |   |   |   |   |
|          |                        |                      |         |         | 30.500  | 21.500  | 43.5294    | 21.5000  |                                                      |                         |    |    |   |   |   |   |
| SGO_0008 | 1.064                  | 9.833                | 0.0005  | 0.0007  | 214.000 | 156.500 | 319.0876   | 162.8711 | inosine-5'-monophosphate dehydrogenase               |                         |    |    |   |   |   |   |
|          |                        |                      |         |         | 208.000 | 133.000 | 296.8562   | 133.0000 |                                                      |                         |    |    |   |   |   |   |
| SGO_0011 | -1.064                 | 5.482                | 0.0036  | 0.0090  | 6.000   | 13.000  | 8.9464     | 13.5292  | proteinase, M16 family                               |                         |    |    |   |   |   |   |
|          |                        |                      |         |         | 4.000   | 16.500  | 5.7088     | 16.5000  |                                                      |                         |    |    |   |   |   |   |
| SGO_0012 |                        | 1.807                |         |         |         |         |            |          | mpp; peptidase, M16 family                           |                         |    |    |   |   |   |   |
|          |                        |                      |         |         |         | 3.500   |            | 3.5000   |                                                      |                         |    |    |   |   |   |   |
| SGO_0013 | -0.643                 | 5.212                | 0.0434  | 0.1881  | 6.000   | 15.000  | 8.9464     | 15.6106  | hypothetical protein SGO_0013                        |                         |    |    |   |   |   |   |
|          |                        |                      |         |         |         | 12.500  |            | 12.5000  |                                                      |                         |    |    |   |   |   |   |
| SGO_0015 | -2.256                 | 6.598                | 0.0001  | 0.0000  | 5.500   | 39.500  | 8.2009     | 41.1080  | ABC transporter (ATP-binding protein)                |                         |    |    |   |   |   |   |
|          |                        |                      |         |         | 6.000   | 39.000  | 8.5632     | 39.0000  |                                                      |                         |    |    |   |   |   |   |
| SGO_0016 | -0.241                 | 4.669                | 0.0423  | 0.1825  | 3.500   | 7.500   | 5.2187     | 7.8053   | cbiO; ABC transporter, ATP-binding protein           |                         |    |    |   |   |   |   |
|          |                        |                      |         |         | 4.500   | 6.000   | 6.4224     | 6.0000   |                                                      |                         |    |    |   |   |   |   |

Show detected proteins only  
 Show all proteins  
 Filter by category:

Proteins found: 1179

**Test**      **Cutoff**  
     

| Signif | Direction | Applies To   |
|--------|-----------|--------------|
| yes    | +         | ratios, bars |
| no     | n/a       | bars         |
| yes    | -         | ratios, bars |
| yes    | +         | p-, q-Values |
| yes    | -         | p-, q-Values |

[Dot Plots](#)

Summary Table

SgFn vs Sg

SgPg vs Sg

SgPgFn vs Sg

SgPg vs SgFn

SgPgFn vs SgFn

SgPgFn vs SgPg

Coverage

SgPg vs Sg

Raw

Normalized

Log<sub>2</sub> Ratios

| Protein  | SgPg vs Sg             |                      |         |         | Raw    |        | Normalized |         | Description                                                        | Log <sub>2</sub> Ratios |    |    |   |   |   |   |
|----------|------------------------|----------------------|---------|---------|--------|--------|------------|---------|--------------------------------------------------------------------|-------------------------|----|----|---|---|---|---|
|          | Log <sub>2</sub> Ratio | Log <sub>2</sub> Sum | q-Value | p-Value | SgPg   | Sg     | SgPg       | Sg      |                                                                    | -6                      | -4 | -2 | 0 | 2 | 4 | 6 |
| SGO_0017 |                        | 2.351                |         |         |        | 2.500  |            | 2.6018  | ABC-type putative cobalt transport system, permease                |                         |    |    |   |   |   |   |
|          |                        |                      |         |         |        | 2.500  |            | 2.5000  |                                                                    |                         |    |    |   |   |   |   |
| SGO_0019 |                        | 2.807                |         |         |        |        |            |         | sdhA; L-serine dehydratase, iron-sulfur-dependent, alpha subunit   |                         |    |    |   |   |   |   |
|          |                        |                      |         |         |        | 7.000  |            | 7.0000  |                                                                    |                         |    |    |   |   |   |   |
| SGO_0020 |                        | 2.585                |         |         |        |        |            |         | sdhB; L-serine dehydratase, iron-sulfur-dependent, beta subunit    |                         |    |    |   |   |   |   |
|          |                        |                      |         |         |        | 6.000  |            | 6.0000  |                                                                    |                         |    |    |   |   |   |   |
| SGO_0022 | 1.241                  | 5.854                | 0.0025  | 0.0057  | 13.000 | 6.000  | 19.3838    | 6.2443  | trmU; tRNA (5-methylaminomethyl-2-thiouridylate)-methyltransferase |                         |    |    |   |   |   |   |
|          |                        |                      |         |         | 14.500 | 11.500 | 20.6943    | 11.5000 |                                                                    |                         |    |    |   |   |   |   |
| SGO_0025 | 0.338                  | 6.207                | 0.0477  | 0.2100  | 17.500 | 14.500 | 26.0936    | 15.0903 | gidA; glucose inhibited division protein A                         |                         |    |    |   |   |   |   |
|          |                        |                      |         |         | 11.000 | 17.000 | 15.6991    | 17.0000 |                                                                    |                         |    |    |   |   |   |   |
| SGO_0026 | -3.976                 | 7.514                | 0.0005  | 0.0007  | 2.500  | 91.000 | 3.7277     | 94.7046 | DHH subfamily 1 protein                                            |                         |    |    |   |   |   |   |
|          |                        |                      |         |         | 5.500  | 76.500 | 7.8496     | 76.5000 |                                                                    |                         |    |    |   |   |   |   |
| SGO_0027 | 0.376                  | 7.312                | 0.0046  | 0.0126  | 29.000 | 30.500 | 43.2408    | 31.7416 | rplI; ribosomal protein L9                                         |                         |    |    |   |   |   |   |
|          |                        |                      |         |         | 32.500 | 37.500 | 46.3838    | 37.5000 |                                                                    |                         |    |    |   |   |   |   |
| SGO_0028 | -0.451                 | 5.614                | 0.0507  | 0.2268  | 5.000  | 11.000 | 7.4553     | 11.4478 | dnaC; replicative DNA helicase                                     |                         |    |    |   |   |   |   |
|          |                        |                      |         |         | 9.500  | 16.500 | 13.5583    | 16.5000 |                                                                    |                         |    |    |   |   |   |   |
| SGO_0030 | 0.967                  | 7.027                | 0.0008  | 0.0011  | 30.000 | 19.000 | 44.7319    | 19.7735 | aspB; aspartate transaminase                                       |                         |    |    |   |   |   |   |
|          |                        |                      |         |         | 29.000 | 24.500 | 41.3886    | 24.5000 |                                                                    |                         |    |    |   |   |   |   |
| SGO_0032 | 0.024                  | 7.492                | 0.1697  | 0.8926  | 30.500 | 38.000 | 45.4774    | 39.5470 | plsX; fatty acid/phospholipid synthesis protein PlsX               |                         |    |    |   |   |   |   |
|          |                        |                      |         |         | 31.500 | 50.000 | 44.9566    | 50.0000 |                                                                    |                         |    |    |   |   |   |   |
| SGO_0033 | 0.994                  | 5.306                | 0.0039  | 0.0102  | 10.000 | 5.500  | 14.9106    | 5.7239  | acpP; acyl carrier protein                                         |                         |    |    |   |   |   |   |
|          |                        |                      |         |         | 8.000  | 7.500  | 11.4175    | 7.5000  |                                                                    |                         |    |    |   |   |   |   |
| SGO_0035 | -0.709                 | 2.496                |         |         |        |        |            |         | phosphoribosylformylglycinamide synthase                           |                         |    |    |   |   |   |   |
|          |                        |                      |         |         | 1.500  | 3.500  | 2.1408     | 3.5000  |                                                                    |                         |    |    |   |   |   |   |

 Show detected proteins only Show all proteinsProteins found:  
1179 Filter by category:

ABC Transporter

Test

Cutoff

q-Value

.005

p-Value

|             | Signif | Direction | Applies To   |
|-------------|--------|-----------|--------------|
| Red         | yes    | +         | ratios, bars |
| Yellow      | no     | n/a       | bars         |
| Green       | yes    | -         | ratios, bars |
| Pink        | yes    | +         | p-, q-Values |
| Light Green | yes    | -         | p-, q-Values |

Dot Plots Dot Plots

Summary Table

SgFn vs Sg

SgPg vs Sg

SgPgFn vs Sg

SgPg vs SgFn

SgPgFn vs SgFn

SgPgFn vs SgPg

Coverage

SgPg vs Sg

Raw

Normalized

Log<sub>2</sub> Ratios

| Protein  | SgPg vs Sg             |                      |         |         | Raw      |          | Normalized |           | Description                          | Log <sub>2</sub> Ratios |    |    |   |   |   |   |
|----------|------------------------|----------------------|---------|---------|----------|----------|------------|-----------|--------------------------------------|-------------------------|----|----|---|---|---|---|
|          | Log <sub>2</sub> Ratio | Log <sub>2</sub> Sum | q-Value | p-Value | SgPg     | Sg       | SgPg       | Sg        |                                      | -6                      | -4 | -2 | 0 | 2 | 4 | 6 |
| SGO_0042 | 0.355                  | 5.804                | 0.0083  | 0.0260  | 11.500   | 11.500   | 17.1472    | 11.9682   | transcription regulator, GntR family |                         |    |    |   |   |   |   |
|          |                        |                      |         |         | 10.000   | 12.500   | 14.2719    | 12.5000   |                                      |                         |    |    |   |   |   |   |
| SGO_0044 |                        |                      |         |         |          |          |            |           | PTS system, IIB component            |                         |    |    |   |   |   |   |
|          |                        |                      |         |         |          |          |            |           |                                      |                         |    |    |   |   |   |   |
| SGO_0050 |                        | 4.640                |         |         |          | 10.500   |            | 10.9275   | hypothetical protein SGO_0050        |                         |    |    |   |   |   |   |
|          |                        |                      |         |         |          | 14.000   |            | 14.0000   |                                      |                         |    |    |   |   |   |   |
| SGO_0051 |                        | 3.351                |         |         |          | 5.000    |            | 5.2035    | hypothetical protein SGO_0051        |                         |    |    |   |   |   |   |
|          |                        |                      |         |         |          | 5.000    |            | 5.0000    |                                      |                         |    |    |   |   |   |   |
| SGO_0054 | 0.238                  | 7.609                | 0.0136  | 0.0480  | 33.500   | 40.000   | 49.9506    | 41.6284   | dltA; D-alanine-activating enzyme    |                         |    |    |   |   |   |   |
|          |                        |                      |         |         | 39.000   | 48.000   | 55.6605    | 48.0000   |                                      |                         |    |    |   |   |   |   |
| SGO_0055 |                        | 2.058                |         |         |          | 4.000    |            | 4.1628    | dltB; integral membrane protein      |                         |    |    |   |   |   |   |
|          |                        |                      |         |         |          |          |            |           |                                      |                         |    |    |   |   |   |   |
| SGO_0056 |                        | 3.420                |         |         |          | 5.000    |            | 5.2035    | dltC; D-alanyl carrier protein       |                         |    |    |   |   |   |   |
|          |                        |                      |         |         |          | 5.500    |            | 5.5000    |                                      |                         |    |    |   |   |   |   |
| SGO_0057 | -2.098                 | 8.163                | 0.0008  | 0.0012  | 18.500   | 99.500   | 27.5847    | 103.5506  | dltD protein                         |                         |    |    |   |   |   |   |
|          |                        |                      |         |         | 18.500   | 129.000  | 26.4031    | 129.0000  |                                      |                         |    |    |   |   |   |   |
| SGO_0059 | 1.097                  | 12.538               | 0.0073  | 0.0222  | 1491.000 | 1257.500 | 2223.1761  | 1308.6923 | pXO1; hypothetical protein SGO_0059  |                         |    |    |   |   |   |   |
|          |                        |                      |         |         | 1233.500 | 653.500  | 1760.4431  | 653.5000  |                                      |                         |    |    |   |   |   |   |
| SGO_0060 |                        | 8.043                |         |         |          | 118.000  |            | 122.8037  | hypothetical protein SGO_0060        |                         |    |    |   |   |   |   |
|          |                        |                      |         |         |          | 141.000  |            | 141.0000  |                                      |                         |    |    |   |   |   |   |
| SGO_0062 |                        | 1.380                |         |         |          | 2.500    |            | 2.6018    | hypothetical protein SGO_0062        |                         |    |    |   |   |   |   |
|          |                        |                      |         |         |          |          |            |           |                                      |                         |    |    |   |   |   |   |
| SGO_0063 | -1.765                 | 7.875                | 0.0002  | 0.0001  | 15.500   | 86.000   | 23.1115    | 89.5010   | hypothetical protein SGO_0063        |                         |    |    |   |   |   |   |
|          |                        |                      |         |         | 21.500   | 91.500   | 30.6847    | 91.5000   |                                      |                         |    |    |   |   |   |   |

 Show detected proteins only Show all proteinsProteins found:  
1179 Filter by category:

ABC Transporter

Test

Cutoff

q-Value

p-Value

.005

|             | Signif | Direction | Applies To   |
|-------------|--------|-----------|--------------|
| Red         | yes    | +         | ratios, bars |
| Yellow      | no     | n/a       | bars         |
| Green       | yes    | -         | ratios, bars |
| Pink        | yes    | +         | p-, q-Values |
| Light Green | yes    | -         | p-, q-Values |

Dot Plots Dot Plots

Summary Table

SgFn vs Sg

SgPg vs Sg

SgPgFn vs Sg

SgPg vs SgFn

SgPgFn vs SgFn

SgPgFn vs SgPg

Coverage

| Protein  | SgPg vs Sg             |                      |         |         | Raw    |         | Normalized |          | Description                                  | Log <sub>2</sub> Ratios |    |    |   |   |   |   |
|----------|------------------------|----------------------|---------|---------|--------|---------|------------|----------|----------------------------------------------|-------------------------|----|----|---|---|---|---|
|          | Log <sub>2</sub> Ratio | Log <sub>2</sub> Sum | q-Value | p-Value | SgPg   | Sg      | SgPg       | Sg       |                                              | -6                      | -4 | -2 | 0 | 2 | 4 | 6 |
| SGO_0064 | -1.647                 | 9.154                | 0.0003  | 0.0002  | 40.000 | 214.000 | 59.6426    | 222.7119 | FtsK/SpoIIIE family protein                  |                         |    |    |   |   |   |   |
|          |                        |                      |         |         | 55.500 | 208.000 | 79.2092    | 208.0000 |                                              |                         |    |    |   |   |   |   |
| SGO_0065 | 0.339                  | 7.484                | 0.0009  | 0.0013  | 34.500 | 37.500  | 51.4417    | 39.0266  | hypothetical protein SGO_0065                |                         |    |    |   |   |   |   |
|          |                        |                      |         |         | 34.000 | 40.000  | 48.5246    | 40.0000  |                                              |                         |    |    |   |   |   |   |
| SGO_0066 |                        | 4.494                |         |         | 6.500  |         | 9.6919     |          | D-3-phosphoglycerate dehydrogenase, putative |                         |    |    |   |   |   |   |
|          |                        |                      |         |         | 9.000  |         | 12.8447    |          |                                              |                         |    |    |   |   |   |   |
| SGO_0067 | 0.784                  | 7.024                | 0.0059  | 0.0173  | 32.000 | 23.000  | 47.7140    | 23.9363  | protein with prophage function domain        |                         |    |    |   |   |   |   |
|          |                        |                      |         |         | 24.500 | 23.500  | 34.9662    | 23.5000  |                                              |                         |    |    |   |   |   |   |
| SGO_0068 | -0.510                 | 6.655                | 0.0016  | 0.0031  | 13.500 | 30.000  | 20.1294    | 31.2213  | lipoprotein, putative                        |                         |    |    |   |   |   |   |
|          |                        |                      |         |         | 15.000 | 28.000  | 21.4079    | 28.0000  |                                              |                         |    |    |   |   |   |   |
| SGO_0069 | -0.728                 | 6.084                | 0.0007  | 0.0009  | 9.000  | 19.500  | 13.4196    | 20.2938  | hypothetical protein SGO_0069                |                         |    |    |   |   |   |   |
|          |                        |                      |         |         | 8.500  | 22.000  | 12.1311    | 22.0000  |                                              |                         |    |    |   |   |   |   |
| SGO_0070 | 0.264                  | 6.588                | 0.0177  | 0.0667  | 16.500 | 19.000  | 24.6026    | 19.7735  | merozoite surface protein 1                  |                         |    |    |   |   |   |   |
|          |                        |                      |         |         | 19.500 | 24.000  | 27.8303    | 24.0000  |                                              |                         |    |    |   |   |   |   |
| SGO_0075 |                        | 1.380                |         |         |        | 2.500   |            | 2.6018   | hypothetical protein SGO_0075                |                         |    |    |   |   |   |   |
|          |                        |                      |         |         |        |         |            |          |                                              |                         |    |    |   |   |   |   |
| SGO_0078 | -1.267                 | 6.328                | 0.0090  | 0.0292  | 9.500  | 34.000  | 14.1651    | 35.3841  | hypothetical protein SGO_0078                |                         |    |    |   |   |   |   |
|          |                        |                      |         |         | 6.500  | 21.500  | 9.2768     | 21.5000  |                                              |                         |    |    |   |   |   |   |
| SGO_0079 |                        | 1.380                |         |         |        | 2.500   |            | 2.6018   | hypothetical protein SGO_0079                |                         |    |    |   |   |   |   |
|          |                        |                      |         |         |        |         |            |          |                                              |                         |    |    |   |   |   |   |
| SGO_0080 | -0.712                 | 7.484                | 0.0011  | 0.0018  | 24.500 | 51.000  | 36.5311    | 53.0762  | hypothetical protein SGO_0080                |                         |    |    |   |   |   |   |
|          |                        |                      |         |         | 22.000 | 58.000  | 31.3983    | 58.0000  |                                              |                         |    |    |   |   |   |   |
| SGO_0081 | 1.034                  | 4.842                | 0.0181  | 0.0685  | 8.000  | 3.000   | 11.9285    | 3.1221   | hypothetical protein SGO_0081                |                         |    |    |   |   |   |   |
|          |                        |                      |         |         | 5.000  | 6.500   | 7.1360     | 6.5000   |                                              |                         |    |    |   |   |   |   |

- Show detected proteins only
- Show all proteins

Proteins found: 1179

Filter by category:  
ABC Transporter

Test

Cutoff

q-Value

.005

p-Value

|             | Signif | Direction | Applies To   |
|-------------|--------|-----------|--------------|
| Red         | yes    | +         | ratios, bars |
| Yellow      | no     | n/a       | bars         |
| Green       | yes    | -         | ratios, bars |
| Pink        | yes    | +         | p-, q-Values |
| Light Green | yes    | -         | p-, q-Values |

Dot Plots Dot Plots

Summary Table

SgFn vs Sg

SgPg vs Sg

SgPgFn vs Sg

SgPg vs SgFn

SgPgFn vs SgFn

SgPgFn vs SgPg

Coverage

| Protein  | SgPg vs Sg             |                      |         |         | Raw     |         | Normalized |          | Description                                              | Log <sub>2</sub> Ratios |    |    |   |   |   |   |
|----------|------------------------|----------------------|---------|---------|---------|---------|------------|----------|----------------------------------------------------------|-------------------------|----|----|---|---|---|---|
|          | Log <sub>2</sub> Ratio | Log <sub>2</sub> Sum | q-Value | p-Value | SgPg    | Sg      | SgPg       | Sg       |                                                          | -6                      | -4 | -2 | 0 | 2 | 4 | 6 |
| SGO_0095 |                        | 5.271                |         |         | 12.500  |         | 18.6383    |          | mccF; microcin immunity protein MccF, putative           |                         |    |    |   |   |   |   |
|          |                        |                      |         |         | 14.000  |         | 19.9807    |          |                                                          |                         |    |    |   |   |   |   |
| SGO_0097 |                        | 6.097                |         |         |         | 36.000  |            | 37.4655  | hypothetical protein SGO_0097                            |                         |    |    |   |   |   |   |
|          |                        |                      |         |         |         | 31.000  |            | 31.0000  |                                                          |                         |    |    |   |   |   |   |
| SGO_0098 | 0.979                  | 6.324                | 0.0344  | 0.1448  | 19.000  | 15.500  | 28.3302    | 16.1310  | ribonucleotide reductase-like protein                    |                         |    |    |   |   |   | 1 |
|          |                        |                      |         |         | 25.000  |         | 35.6798    |          |                                                          |                         |    |    |   |   |   |   |
| SGO_0099 |                        | 3.712                |         |         | 4.000   |         | 5.9643     |          | pula-2; pullulanase, type I                              |                         |    |    |   |   |   |   |
|          |                        |                      |         |         | 5.000   |         | 7.1360     |          |                                                          |                         |    |    |   |   |   |   |
| SGO_0100 | 0.127                  | 4.089                | 0.1827  | 0.9834  |         | 7.500   |            | 7.8053   | maltose operon transcription repressor                   |                         |    |    |   |   |   |   |
|          |                        |                      |         |         | 4.000   | 3.500   | 5.7088     | 3.5000   |                                                          |                         |    |    |   |   |   |   |
| SGO_0101 |                        | 4.874                |         |         |         | 8.000   |            | 8.3257   | malA; Maltodextrose utilization protein malA             |                         |    |    |   |   |   |   |
|          |                        |                      |         |         |         | 21.000  |            | 21.0000  |                                                          |                         |    |    |   |   |   |   |
| SGO_0104 | -0.689                 | 9.636                | 0.0001  | 0.0000  | 100.000 | 234.000 | 149.1064   | 243.5261 | Maltose/maltodextrin-binding protein precursor           |                         |    |    |   |   |   | 1 |
|          |                        |                      |         |         | 109.000 | 247.500 | 155.5641   | 247.5000 |                                                          |                         |    |    |   |   |   |   |
| SGO_0105 | 0.873                  | 6.200                | 0.0011  | 0.0019  | 16.500  | 14.000  | 24.6026    | 14.5699  | malQ; 4-alpha-glucanotransferase                         |                         |    |    |   |   |   | 1 |
|          |                        |                      |         |         | 16.000  | 11.500  | 22.8351    | 11.5000  |                                                          |                         |    |    |   |   |   |   |
| SGO_0106 | 1.969                  | 7.831                | 0.0002  | 0.0001  | 61.500  | 19.000  | 91.7004    | 19.7735  | glgP-2; maltodextrin phosphorylase                       |                         |    |    |   |   |   | 2 |
|          |                        |                      |         |         | 62.500  | 27.000  | 89.1996    | 27.0000  |                                                          |                         |    |    |   |   |   |   |
| SGO_0107 |                        |                      |         |         |         |         |            |          | LPXTG cell wall surface protein, collagen binding domain |                         |    |    |   |   |   |   |
|          |                        |                      |         |         |         |         |            |          |                                                          |                         |    |    |   |   |   |   |
| SGO_0108 |                        | 5.505                |         |         |         | 22.500  |            | 23.4160  | ruvB; Holliday junction DNA helicase RuvB                |                         |    |    |   |   |   |   |
|          |                        |                      |         |         |         | 22.000  |            | 22.0000  |                                                          |                         |    |    |   |   |   |   |
| SGO_0110 |                        | 2.898                |         |         | 5.000   |         | 7.4553     |          | phosphotyrosine protein phosphatase                      |                         |    |    |   |   |   |   |
|          |                        |                      |         |         |         |         |            |          |                                                          |                         |    |    |   |   |   |   |

- Show detected proteins only
- Show all proteins

Proteins found: 1179

Filter by category:

ABC Transporter

Test

Cutoff

q-Value

.005

p-Value

|             | Signif | Direction | Applies To   |
|-------------|--------|-----------|--------------|
| Red         | yes    | +         | ratios, bars |
| Yellow      | no     | n/a       | bars         |
| Green       | yes    | -         | ratios, bars |
| Pink        | yes    | +         | p-, q-Values |
| Light Green | yes    | -         | p-, q-Values |

Dot Plots Dot Plots

Summary Table

SgFn vs Sg

SgPg vs Sg

SgPgFn vs Sg

SgPg vs SgFn

SgPgFn vs SgFn

SgPgFn vs SgPg

Coverage

| Protein  | SgPg vs Sg             |                      |         |         | Raw     |          | Normalized |           | Description                               | Log <sub>2</sub> Ratios |    |    |   |   |   |   |
|----------|------------------------|----------------------|---------|---------|---------|----------|------------|-----------|-------------------------------------------|-------------------------|----|----|---|---|---|---|
|          | Log <sub>2</sub> Ratio | Log <sub>2</sub> Sum | q-Value | p-Value | SgPg    | Sg       | SgPg       | Sg        |                                           | -6                      | -4 | -2 | 0 | 2 | 4 | 6 |
| SGO_0111 |                        | 4.115                |         |         |         | 8.000    |            | 8.3257    | MORN motif family protein                 |                         |    |    |   |   |   |   |
|          |                        |                      |         |         |         | 9.000    |            | 9.0000    |                                           |                         |    |    |   |   |   |   |
| SGO_0112 |                        | 5.366                |         |         |         | 18.000   |            | 18.7328   | putative acyltransferase                  |                         |    |    |   |   |   |   |
|          |                        |                      |         |         |         | 22.500   |            | 22.5000   |                                           |                         |    |    |   |   |   |   |
| SGO_0113 | -1.505                 | 13.143               | 0.0002  | 0.0001  | 838.500 | 3329.000 | 1250.2570  | 3464.5223 | acdH; alcohol-acetaldehyde dehydrogenase  |                         |    |    |   |   |   |   |
|          |                        |                      |         |         | 777.000 | 3222.500 | 1108.9293  | 3222.5000 |                                           |                         |    |    |   |   |   |   |
| SGO_0128 |                        | 3.170                |         |         |         |          |            |           | hypothetical protein SGO_0128             |                         |    |    |   |   |   |   |
|          |                        |                      |         |         |         | 9.000    |            | 9.0000    |                                           |                         |    |    |   |   |   |   |
| SGO_0129 | -3.290                 | 6.881                | 0.0002  | 0.0001  | 3.500   | 48.500   | 5.2187     | 50.4744   | atpI; v-type sodium ATP synthase, chain I |                         |    |    |   |   |   |   |
|          |                        |                      |         |         | 4.000   | 56.500   | 5.7088     | 56.5000   |                                           |                         |    |    |   |   |   |   |
| SGO_0131 |                        | 5.425                |         |         |         | 11.000   |            | 11.4478   | v-type sodium ATP synthase, chain E       |                         |    |    |   |   |   |   |
|          |                        |                      |         |         |         | 31.500   |            | 31.5000   |                                           |                         |    |    |   |   |   |   |
| SGO_0132 | -1.088                 | 4.528                | 0.0494  | 0.2205  | 2.500   |          | 3.7277     |           | ATP synthase (C/AC39) subunit             |                         |    |    |   |   |   |   |
|          |                        |                      |         |         | 5.500   | 11.500   | 7.8496     | 11.5000   |                                           |                         |    |    |   |   |   |   |
| SGO_0134 | 0.106                  | 5.225                | 0.1182  | 0.5924  | 5.000   | 7.500    | 7.4553     | 7.8053    | acetyltransferase, GNAT family            |                         |    |    |   |   |   |   |
|          |                        |                      |         |         | 8.500   | 10.000   | 12.1311    | 10.0000   |                                           |                         |    |    |   |   |   |   |
| SGO_0135 | -0.954                 | 7.926                | 0.0003  | 0.0003  | 25.500  | 77.500   | 38.0221    | 80.6550   | v-type sodium ATP synthase, subunit A     |                         |    |    |   |   |   |   |
|          |                        |                      |         |         | 31.500  | 79.500   | 44.9566    | 79.5000   |                                           |                         |    |    |   |   |   |   |
| SGO_0136 | -1.309                 | 8.383                | 0.0007  | 0.0010  | 29.500  | 106.000  | 43.9864    | 110.3152  | v-type sodium ATP synthase, chain B       |                         |    |    |   |   |   |   |
|          |                        |                      |         |         | 36.500  | 127.500  | 52.0926    | 127.5000  |                                           |                         |    |    |   |   |   |   |
| SGO_0137 |                        | 3.653                |         |         |         | 2.000    |            | 2.0814    | V-type ATPase, D subunit                  |                         |    |    |   |   |   |   |
|          |                        |                      |         |         |         | 10.500   |            | 10.5000   |                                           |                         |    |    |   |   |   |   |
| SGO_0138 |                        | 2.459                |         |         |         |          |            |           | LysM domain protein                       |                         |    |    |   |   |   |   |
|          |                        |                      |         |         |         | 5.500    |            | 5.5000    |                                           |                         |    |    |   |   |   |   |

- Show detected proteins only
- Show all proteins

Proteins found: 1179

Filter by category:

ABC Transporter

Test

Cutoff

q-Value

.005

p-Value

|             | Signif | Direction | Applies To   |
|-------------|--------|-----------|--------------|
| Red         | yes    | +         | ratios, bars |
| Yellow      | no     | n/a       | bars         |
| Green       | yes    | -         | ratios, bars |
| Pink        | yes    | +         | p-, q-Values |
| Light Green | yes    | -         | p-, q-Values |

Dot Plots Dot Plots

Summary Table

SgFn vs Sg

SgPg vs Sg

SgPgFn vs Sg

SgPg vs SgFn

SgPgFn vs SgFn

SgPgFn vs SgPg

Coverage

| Protein  | SgPg vs Sg             |                      |         |         | Raw     |         | Normalized |          | Description                          | Log <sub>2</sub> Ratios |    |    |   |   |
|----------|------------------------|----------------------|---------|---------|---------|---------|------------|----------|--------------------------------------|-------------------------|----|----|---|---|
|          | Log <sub>2</sub> Ratio | Log <sub>2</sub> Sum | q-Value | p-Value | SgPg    | Sg      | SgPg       | Sg       |                                      | -6                      | -4 | -2 | 0 | 2 |
| SGO_0139 | 0.581                  | 7.434                | 0.0007  | 0.0010  | 36.000  | 32.000  | 53.6783    | 33.3027  | thrC; threonine synthase             |                         |    |    |   |   |
|          |                        |                      |         |         | 35.000  | 36.000  | 49.9518    | 36.0000  |                                      |                         |    |    |   |   |
| SGO_0142 |                        | 1.585                |         |         |         |         |            |          | hypothetical protein SGO_0142        |                         |    |    |   |   |
|          |                        |                      |         |         |         | 3.000   |            | 3.0000   |                                      |                         |    |    |   |   |
| SGO_0144 | -2.511                 | 5.213                | 0.0174  | 0.0651  | 2.000   | 15.000  | 2.9821     | 15.6106  | hypothetical protein SGO_0144        |                         |    |    |   |   |
|          |                        |                      |         |         |         | 18.500  |            | 18.5000  |                                      |                         |    |    |   |   |
| SGO_0145 | -0.566                 | 7.699                | 0.0007  | 0.0009  | 27.000  | 61.500  | 40.2587    | 64.0036  | polI; DNA polymerase I               |                         |    |    |   |   |
|          |                        |                      |         |         | 30.500  | 60.000  | 43.5294    | 60.0000  |                                      |                         |    |    |   |   |
| SGO_0146 | 0.659                  | 6.116                | 0.0087  | 0.0278  | 16.000  | 11.000  | 23.8570    | 11.4478  | CoA-binding domain protein           |                         |    |    |   |   |
|          |                        |                      |         |         | 13.000  | 15.500  | 18.5535    | 15.5000  |                                      |                         |    |    |   |   |
| SGO_0148 | -1.225                 | 4.667                | 0.0139  | 0.0492  | 3.000   | 10.500  | 4.4732     | 10.9275  | hypothetical protein SGO_0148        |                         |    |    |   |   |
|          |                        |                      |         |         |         | 10.000  |            | 10.0000  |                                      |                         |    |    |   |   |
| SGO_0150 |                        | 1.380                |         |         |         | 2.500   |            | 2.6018   | fucA1; alpha-L-fucosidase            |                         |    |    |   |   |
|          |                        |                      |         |         |         |         |            |          |                                      |                         |    |    |   |   |
| SGO_0152 | 1.009                  | 6.079                | 0.0003  | 0.0003  | 14.500  | 10.500  | 21.6204    | 10.9275  | tgt; queuine tRNA-ribosyltransferase |                         |    |    |   |   |
|          |                        |                      |         |         | 16.500  | 11.500  | 23.5487    | 11.5000  |                                      |                         |    |    |   |   |
| SGO_0154 | 0.517                  | 10.445               | 0.0109  | 0.0367  | 307.000 | 309.500 | 457.7566   | 322.0996 | pgi; glucose-6-phosphate isomerase   |                         |    |    |   |   |
|          |                        |                      |         |         | 254.000 | 251.500 | 362.5071   | 251.5000 |                                      |                         |    |    |   |   |
| SGO_0155 | -4.703                 | 8.402                | 0.0009  | 0.0014  | 4.000   | 179.000 | 5.9643     | 186.2870 | hypothetical protein SGO_0155        |                         |    |    |   |   |
|          |                        |                      |         |         | 4.500   | 139.500 | 6.4224     | 139.5000 |                                      |                         |    |    |   |   |
| SGO_0156 | -2.580                 | 7.668                | 0.0004  | 0.0004  | 11.000  | 90.500  | 16.4017    | 94.1842  | hypothetical protein SGO_0156        |                         |    |    |   |   |
|          |                        |                      |         |         | 9.000   | 80.000  | 12.8447    | 80.0000  |                                      |                         |    |    |   |   |
| SGO_0157 |                        | 3.357                |         |         |         | 6.000   |            | 6.2443   | hypothetical protein SGO_0157        |                         |    |    |   |   |
|          |                        |                      |         |         |         | 4.000   |            | 4.0000   |                                      |                         |    |    |   |   |

- Show detected proteins only
- Show all proteins

Proteins found: 1179

Filter by category:

ABC Transporter

Test

Cutoff

q-Value

.005

p-Value

|  | Signif | Direction | Applies To   |
|--|--------|-----------|--------------|
|  | yes    | +         | ratios, bars |
|  | no     | n/a       | bars         |
|  | yes    | -         | ratios, bars |
|  | yes    | +         | p-, q-Values |
|  | yes    | -         | p-, q-Values |

Dot Plots Dot Plots

Summary Table

SgFn vs Sg

SgPg vs Sg

SgPgFn vs Sg

SgPg vs SgFn

SgPgFn vs SgFn

SgPgFn vs SgPg

Coverage

| Protein  | SgPg vs Sg             |                      |         |         | Raw    |        | Normalized |         | Description                                                                                         | Log <sub>2</sub> Ratios |    |    |   |   |
|----------|------------------------|----------------------|---------|---------|--------|--------|------------|---------|-----------------------------------------------------------------------------------------------------|-------------------------|----|----|---|---|
|          | Log <sub>2</sub> Ratio | Log <sub>2</sub> Sum | q-Value | p-Value | SgPg   | Sg     | SgPg       | Sg      |                                                                                                     | -6                      | -4 | -2 | 0 | 2 |
| SGO_0158 | 1.379                  | 7.403                | 0.0009  | 0.0014  | 37.500 | 24.500 | 55.9149    | 25.4974 | 2,3,4,5-tetrahydropyridine-2-carboxylate N-succinyltransferase, putative                            |                         |    |    |   |   |
|          |                        |                      |         |         | 46.500 | 21.500 | 66.3645    | 21.5000 |                                                                                                     |                         |    |    |   |   |
| SGO_0159 | -0.424                 | 2.804                |         |         | 2.000  |        | 2.9821     |         | hippurate hydrolase                                                                                 |                         |    |    |   |   |
|          |                        |                      |         |         |        | 4.000  |            | 4.0000  |                                                                                                     |                         |    |    |   |   |
| SGO_0163 | 0.746                  | 7.631                | 0.0010  | 0.0016  | 41.000 | 32.000 | 61.1336    | 33.3027 | galU; UTP-glucose-1-phosphate uridylyltransferase                                                   |                         |    |    |   |   |
|          |                        |                      |         |         | 44.000 | 41.000 | 62.7965    | 41.0000 |                                                                                                     |                         |    |    |   |   |
| SGO_0164 | -0.280                 | 7.349                | 0.0252  | 0.1009  | 28.000 | 40.000 | 41.7498    | 41.6284 | Glycerol-3-phosphate dehydrogenase [NAD(P)+] (NAD(P)H-dependent glycerol-3-phosphate dehydrogenase) |                         |    |    |   |   |
|          |                        |                      |         |         | 22.500 | 47.500 | 32.1119    | 47.5000 |                                                                                                     |                         |    |    |   |   |
| SGO_0165 |                        | 4.275                |         |         |        | 9.000  |            | 9.3664  | ABC transporter, permease/ATP-binding protein SP2075                                                |                         |    |    |   |   |
|          |                        |                      |         |         |        | 10.000 |            | 10.0000 |                                                                                                     |                         |    |    |   |   |
| SGO_0166 | -2.723                 | 6.342                | 0.0082  | 0.0256  |        | 35.000 |            | 36.4248 | ABC transporter, permease/ATP-binding protein SP2073                                                |                         |    |    |   |   |
|          |                        |                      |         |         | 4.000  | 39.000 | 5.7088     | 39.0000 |                                                                                                     |                         |    |    |   |   |
| SGO_0167 |                        | 4.020                |         |         |        | 5.500  |            | 5.7239  | glutamine amidotransferase                                                                          |                         |    |    |   |   |
|          |                        |                      |         |         |        | 10.500 |            | 10.5000 |                                                                                                     |                         |    |    |   |   |
| SGO_0168 |                        | 4.156                |         |         |        | 8.000  |            | 8.3257  | hydrolase, NUDIX family                                                                             |                         |    |    |   |   |
|          |                        |                      |         |         |        | 9.500  |            | 9.5000  |                                                                                                     |                         |    |    |   |   |
| SGO_0169 | 0.502                  | 5.611                | 0.0352  | 0.1490  | 11.500 | 7.500  | 17.1472    | 7.8053  | dut; dUTP diphosphatase                                                                             |                         |    |    |   |   |
|          |                        |                      |         |         | 8.000  | 12.500 | 11.4175    | 12.5000 |                                                                                                     |                         |    |    |   |   |
| SGO_0171 | -0.402                 | 6.118                | 0.0338  | 0.1424  | 8.500  | 15.500 | 12.6740    | 16.1310 | radA; DNA repair protein RadA                                                                       |                         |    |    |   |   |
|          |                        |                      |         |         | 12.000 | 23.500 | 17.1263    | 23.5000 |                                                                                                     |                         |    |    |   |   |
| SGO_0172 |                        | 5.614                |         |         |        | 24.000 |            | 24.9770 | conserved hypothetical protein TIGR00266                                                            |                         |    |    |   |   |
|          |                        |                      |         |         |        | 24.000 |            | 24.0000 |                                                                                                     |                         |    |    |   |   |
| SGO_0173 | -3.121                 | 7.570                | 0.0001  | 0.0000  | 7.500  | 80.000 | 11.1830    | 83.2568 | Carbonic anhydrase                                                                                  |                         |    |    |   |   |
|          |                        |                      |         |         | 6.000  | 87.000 | 8.5632     | 87.0000 |                                                                                                     |                         |    |    |   |   |

- Show detected proteins only
- Show all proteins

Proteins found: 1179

Filter by category: ABC Transporter

Test

Cutoff

q-Value

.005

p-Value

|             | Signif | Direction | Applies To   |
|-------------|--------|-----------|--------------|
| Red         | yes    | +         | ratios, bars |
| Yellow      | no     | n/a       | bars         |
| Green       | yes    | -         | ratios, bars |
| Pink        | yes    | +         | p-, q-Values |
| Light Green | yes    | -         | p-, q-Values |

Dot Plots Dot Plots



Summary Table

SgFn vs Sg

SgPg vs Sg

SgPgFn vs Sg

SgPg vs SgFn

SgPgFn vs SgFn

SgPgFn vs SgPg

Coverage

SgPg vs Sg

Raw

Normalized

Log<sub>2</sub> Ratios

| Protein  | SgPg vs Sg             |                      |         |         | Raw    |        |          |         | Normalized |    |      |    | Description | Log <sub>2</sub> Ratios |    |    |   |   |   |   |  |
|----------|------------------------|----------------------|---------|---------|--------|--------|----------|---------|------------|----|------|----|-------------|-------------------------|----|----|---|---|---|---|--|
|          | Log <sub>2</sub> Ratio | Log <sub>2</sub> Sum | q-Value | p-Value | SgPg   | Sg     | SgPg     | Sg      | SgPg       | Sg | SgPg | Sg |             | -6                      | -4 | -2 | 0 | 2 | 4 | 6 |  |
| SGO_0174 | 1.114                  | 8.678                | 0.0001  | 0.0000  | 94.500 | 60.500 | 140.9055 | 62.9629 |            |    |      |    |             |                         |    |    |   |   |   |   |  |
|          |                        |                      |         |         | 97.500 | 66.500 | 139.1514 | 66.5000 |            |    |      |    |             |                         |    |    |   |   |   |   |  |
| SGO_0179 |                        | 2.585                |         |         |        |        |          |         |            |    |      |    |             |                         |    |    |   |   |   |   |  |
|          |                        |                      |         |         |        | 6.000  |          | 6.0000  |            |    |      |    |             |                         |    |    |   |   |   |   |  |
| SGO_0180 | -0.132                 | 7.007                | 0.1414  | 0.7291  | 26.500 | 24.000 | 39.5132  | 24.9770 |            |    |      |    |             |                         |    |    |   |   |   |   |  |
|          |                        |                      |         |         | 15.500 | 42.000 | 22.1215  | 42.0000 |            |    |      |    |             |                         |    |    |   |   |   |   |  |
| SGO_0181 |                        | 5.217                |         |         |        |        |          |         |            |    |      |    |             |                         |    |    |   |   |   |   |  |
|          |                        |                      |         |         |        | 17.000 |          | 17.6921 |            |    |      |    |             |                         |    |    |   |   |   |   |  |
| SGO_0182 |                        | 2.700                |         |         |        |        |          |         |            |    |      |    |             |                         |    |    |   |   |   |   |  |
|          |                        |                      |         |         |        | 6.500  |          | 6.5000  |            |    |      |    |             |                         |    |    |   |   |   |   |  |
| SGO_0188 | -0.745                 | 4.646                | 0.0473  | 0.2076  |        | 8.000  |          | 8.3257  |            |    |      |    |             |                         |    |    |   |   |   |   |  |
|          |                        |                      |         |         | 4.000  | 11.000 | 5.7088   | 11.0000 |            |    |      |    |             |                         |    |    |   |   |   |   |  |
| SGO_0189 |                        | 1.585                |         |         |        |        |          |         |            |    |      |    |             |                         |    |    |   |   |   |   |  |
|          |                        |                      |         |         |        | 3.000  |          | 3.0000  |            |    |      |    |             |                         |    |    |   |   |   |   |  |
| SGO_0190 | -1.685                 | 5.563                | 0.0110  | 0.0370  | 2.000  | 12.500 | 2.9821   | 13.0089 |            |    |      |    |             |                         |    |    |   |   |   |   |  |
|          |                        |                      |         |         | 6.500  | 22.000 | 9.2768   | 22.0000 |            |    |      |    |             |                         |    |    |   |   |   |   |  |
| SGO_0191 | -1.774                 | 4.548                | 0.0060  | 0.0179  | 2.000  | 10.000 | 2.9821   | 10.4071 |            |    |      |    |             |                         |    |    |   |   |   |   |  |
|          |                        |                      |         |         |        | 10.000 |          | 10.0000 |            |    |      |    |             |                         |    |    |   |   |   |   |  |
| SGO_0193 | 0.844                  | 5.139                | 0.0514  | 0.2304  | 6.500  | 3.000  | 9.6919   | 3.1221  |            |    |      |    |             |                         |    |    |   |   |   |   |  |
|          |                        |                      |         |         | 8.000  | 11.000 | 11.4175  | 11.0000 |            |    |      |    |             |                         |    |    |   |   |   |   |  |
| SGO_0197 |                        | 3.541                |         |         | 3.500  |        | 5.2187   |         |            |    |      |    |             |                         |    |    |   |   |   |   |  |
|          |                        |                      |         |         | 4.500  |        | 6.4224   |         |            |    |      |    |             |                         |    |    |   |   |   |   |  |
| SGO_0198 | 0.896                  | 7.170                | 0.0011  | 0.0017  | 32.000 | 27.500 | 47.7140  | 28.6195 |            |    |      |    |             |                         |    |    |   |   |   |   |  |
|          |                        |                      |         |         | 32.000 | 22.000 | 45.6702  | 22.0000 |            |    |      |    |             |                         |    |    |   |   |   |   |  |

- Show detected proteins only  
 Show all proteins

Proteins found:  
1179

Filter by category:

ABC Transporter

Test

Cutoff

q-Value

.005

p-Value

|             | Signif | Direction | Applies To   |
|-------------|--------|-----------|--------------|
| Red         | yes    | +         | ratios, bars |
| Yellow      | no     | n/a       | bars         |
| Green       | yes    | -         | ratios, bars |
| Pink        | yes    | +         | p-, q-Values |
| Light Green | yes    | -         | p-, q-Values |

Dot Plots Dot Plots

Summary Table

SgFn vs Sg

SgPg vs Sg

SgPgFn vs Sg

SgPg vs SgFn

SgPgFn vs SgFn

SgPgFn vs SgPg

Coverage

SgPg vs Sg

Raw

Normalized

Log<sub>2</sub> Ratios

| Protein  | SgPg vs Sg             |                      |         |         | Raw      |          |           |           | Normalized |    |      |    | Description | Log <sub>2</sub> Ratios |    |    |   |   |   |   |
|----------|------------------------|----------------------|---------|---------|----------|----------|-----------|-----------|------------|----|------|----|-------------|-------------------------|----|----|---|---|---|---|
|          | Log <sub>2</sub> Ratio | Log <sub>2</sub> Sum | q-Value | p-Value | SgPg     | Sg       | SgPg      | Sg        | SgPg       | Sg | SgPg | Sg |             | -6                      | -4 | -2 | 0 | 2 | 4 | 6 |
| SGO_0200 | -1.166                 | 7.858                | 0.0002  | 0.0001  | 24.500   | 74.500   | 36.5311   | 77.5329   |            |    |      |    |             |                         |    |    |   |   |   |   |
|          |                        |                      |         |         | 24.500   | 83.000   | 34.9662   | 83.0000   |            |    |      |    |             |                         |    |    |   |   |   |   |
| SGO_0201 | -0.173                 | 7.404                | 0.0277  | 0.1122  | 26.000   | 47.000   | 38.7677   | 48.9134   |            |    |      |    |             |                         |    |    |   |   |   |   |
|          |                        |                      |         |         | 28.500   | 41.000   | 40.6750   | 41.0000   |            |    |      |    |             |                         |    |    |   |   |   |   |
| SGO_0202 | -0.101                 | 5.559                | 0.1063  | 0.5282  | 7.000    | 14.000   | 10.4374   | 14.5699   |            |    |      |    |             |                         |    |    |   |   |   |   |
|          |                        |                      |         |         | 8.500    | 10.000   | 12.1311   | 10.0000   |            |    |      |    |             |                         |    |    |   |   |   |   |
| SGO_0203 |                        | 2.700                |         |         |          |          |           |           |            |    |      |    |             |                         |    |    |   |   |   |   |
|          |                        |                      |         |         |          | 6.500    |           | 6.5000    |            |    |      |    |             |                         |    |    |   |   |   |   |
| SGO_0204 | 0.094                  | 8.177                | 0.0899  | 0.4380  | 56.500   | 63.500   | 84.2451   | 66.0851   |            |    |      |    |             |                         |    |    |   |   |   |   |
|          |                        |                      |         |         | 46.000   | 73.500   | 65.6509   | 73.5000   |            |    |      |    |             |                         |    |    |   |   |   |   |
| SGO_0205 | 0.726                  | 9.456                | 0.0085  | 0.0269  | 124.000  | 113.000  | 184.8919  | 117.6002  |            |    |      |    |             |                         |    |    |   |   |   |   |
|          |                        |                      |         |         | 178.000  | 146.000  | 254.0404  | 146.0000  |            |    |      |    |             |                         |    |    |   |   |   |   |
| SGO_0206 | 0.873                  | 12.482               | 0.0002  | 0.0001  | 1277.000 | 972.500  | 1904.0885 | 1012.0901 |            |    |      |    |             |                         |    |    |   |   |   |   |
|          |                        |                      |         |         | 1258.000 | 1007.500 | 1795.4093 | 1007.5000 |            |    |      |    |             |                         |    |    |   |   |   |   |
| SGO_0207 | 1.071                  | 12.454               | 0.0007  | 0.0010  | 1267.000 | 748.500  | 1889.1778 | 778.9711  |            |    |      |    |             |                         |    |    |   |   |   |   |
|          |                        |                      |         |         | 1330.000 | 1043.000 | 1898.1672 | 1043.0000 |            |    |      |    |             |                         |    |    |   |   |   |   |
| SGO_0208 |                        | 4.996                |         |         |          | 10.000   |           | 10.4071   |            |    |      |    |             |                         |    |    |   |   |   |   |
|          |                        |                      |         |         |          | 21.500   |           | 21.5000   |            |    |      |    |             |                         |    |    |   |   |   |   |
| SGO_0209 | 2.191                  | 13.204               | 0.0002  | 0.0001  | 2477.500 | 845.500  | 3694.1105 | 879.9200  |            |    |      |    |             |                         |    |    |   |   |   |   |
|          |                        |                      |         |         | 2836.000 | 814.500  | 4047.5205 | 814.5000  |            |    |      |    |             |                         |    |    |   |   |   |   |
| SGO_0210 | -5.424                 | 7.976                | 0.0012  | 0.0020  | 1.500    | 98.500   | 2.2366    | 102.5099  |            |    |      |    |             |                         |    |    |   |   |   |   |
|          |                        |                      |         |         | 2.500    | 143.500  | 3.5680    | 143.5000  |            |    |      |    |             |                         |    |    |   |   |   |   |
| SGO_0211 |                        | 9.177                |         |         |          | 254.000  |           | 264.3402  |            |    |      |    |             |                         |    |    |   |   |   |   |
|          |                        |                      |         |         |          | 314.500  |           | 314.5000  |            |    |      |    |             |                         |    |    |   |   |   |   |

- Show detected proteins only  
 Show all proteins

Proteins found:  
1179

Filter by category:

ABC Transporter

Test

Cutoff

q-Value

p-Value

.005

|             | Signif | Direction | Applies To                |
|-------------|--------|-----------|---------------------------|
| Red         | yes    | +         | ratios, bars              |
| Yellow      | no     | n/a       | bars                      |
| Green       | yes    | -         | ratios, bars              |
| Pink        | yes    | +         | p <sup>-</sup> , q-Values |
| Light Green | yes    | -         | p <sup>-</sup> , q-Values |

Dot Plots  Dot Plots

Summary Table

SgFn vs Sg

SgPg vs Sg

SgPgFn vs Sg

SgPg vs SgFn

SgPgFn vs SgFn

SgPgFn vs SgPg

Coverage

| Protein  | SgPg vs Sg             |                      |         |         | Raw    |        | Normalized |         | Description                                                | Log <sub>2</sub> Ratios |    |    |   |   |   |   |
|----------|------------------------|----------------------|---------|---------|--------|--------|------------|---------|------------------------------------------------------------|-------------------------|----|----|---|---|---|---|
|          | Log <sub>2</sub> Ratio | Log <sub>2</sub> Sum | q-Value | p-Value | SgPg   | Sg     | SgPg       | Sg      |                                                            | -6                      | -4 | -2 | 0 | 2 | 4 | 6 |
| SGO_0214 |                        | 1.322                |         |         |        |        |            |         | transcription regulator, MerR family                       |                         |    |    |   |   |   |   |
|          |                        |                      |         |         |        | 2.500  |            | 2.5000  |                                                            |                         |    |    |   |   |   |   |
| SGO_0215 | -0.087                 | 8.628                | 0.0722  | 0.3407  | 70.000 | 95.500 | 104.3745   | 99.3878 | glnA; glutamine synthetase, type I                         |                         |    |    |   |   |   |   |
|          |                        |                      |         |         |        | 61.500 | 104.000    | 87.7724 | 104.0000                                                   |                         |    |    |   |   |   |   |
| SGO_0219 | 0.237                  | 8.297                | 0.0080  | 0.0251  | 57.000 | 74.500 | 84.9906    | 77.5329 | metallo-beta-lactamase superfamily protein 1               |                         |    |    |   |   |   |   |
|          |                        |                      |         |         |        | 59.500 | 67.000     | 84.9180 | 67.0000                                                    |                         |    |    |   |   |   |   |
| SGO_0220 |                        | 4.294                |         |         |        |        |            |         | Protein of unknown function (DUF1447) superfamily          |                         |    |    |   |   |   |   |
|          |                        |                      |         |         |        | 5.500  |            | 8.2009  |                                                            |                         |    |    |   |   |   |   |
|          |                        |                      |         |         |        | 8.000  |            | 11.4175 |                                                            |                         |    |    |   |   |   |   |
| SGO_0223 | 1.487                  | 4.380                | 0.0087  | 0.0279  |        | 4.500  |            | 4.6832  | glycoproteinase family protein                             |                         |    |    |   |   |   |   |
|          |                        |                      |         |         |        | 8.500  | 4.000      | 12.1311 | 4.0000                                                     |                         |    |    |   |   |   |   |
| SGO_0230 | 0.665                  | 5.843                | 0.0050  | 0.0141  | 12.500 | 9.000  | 18.6383    | 9.3664  | Protein of unknown function, DUF536 family                 |                         |    |    |   |   |   |   |
|          |                        |                      |         |         |        | 11.500 | 13.000     | 16.4127 | 13.0000                                                    |                         |    |    |   |   |   |   |
| SGO_0231 |                        | 3.111                |         |         |        |        |            |         | glycerophosphoryl diester phosphodiesterase family protein |                         |    |    |   |   |   |   |
|          |                        |                      |         |         |        |        | 3.500      |         | 3.6425                                                     |                         |    |    |   |   |   |   |
|          |                        |                      |         |         |        |        | 5.000      |         | 5.0000                                                     |                         |    |    |   |   |   |   |
| SGO_0232 | 1.663                  | 4.738                | 0.0558  | 0.2527  | 5.500  |        |            | 8.2009  | conserved hypothetical protein TIGR00103                   |                         |    |    |   |   |   |   |
|          |                        |                      |         |         |        | 10.500 | 3.500      | 14.9855 | 3.5000                                                     |                         |    |    |   |   |   |   |
| SGO_0233 |                        | 5.976                |         |         |        |        |            |         | lipoprotein, putative                                      |                         |    |    |   |   |   |   |
|          |                        |                      |         |         |        |        | 35.000     |         | 36.4248                                                    |                         |    |    |   |   |   |   |
|          |                        |                      |         |         |        |        | 26.500     |         | 26.5000                                                    |                         |    |    |   |   |   |   |
| SGO_0234 | -0.219                 | 7.669                | 0.0216  | 0.0849  | 35.000 | 53.000 | 52.1872    | 55.1576 | pepX; X-Pro dipeptidyl-peptidase                           |                         |    |    |   |   |   |   |
|          |                        |                      |         |         |        | 29.500 | 54.000     | 42.1022 | 54.0000                                                    |                         |    |    |   |   |   |   |
| SGO_0235 | -1.563                 | 7.157                | 0.0048  | 0.0133  | 10.500 | 62.500 | 15.6562    | 65.0444 | glycerol uptake facilitator protein-like protein           |                         |    |    |   |   |   |   |
|          |                        |                      |         |         |        | 14.000 | 42.000     | 19.9807 | 42.0000                                                    |                         |    |    |   |   |   |   |
| SGO_0236 |                        | 4.509                |         |         |        |        |            |         | hypothetical protein SGO_0236                              |                         |    |    |   |   |   |   |
|          |                        |                      |         |         |        |        | 6.500      |         | 6.7646                                                     |                         |    |    |   |   |   |   |
|          |                        |                      |         |         |        |        | 16.000     |         | 16.0000                                                    |                         |    |    |   |   |   |   |

- Show detected proteins only
- Show all proteins

Proteins found: 1179

Filter by category:

ABC Transporter

Test

Cutoff

q-Value

.005

p-Value

|             | Signif | Direction | Applies To   |
|-------------|--------|-----------|--------------|
| Red         | yes    | +         | ratios, bars |
| Yellow      | no     | n/a       | bars         |
| Green       | yes    | -         | ratios, bars |
| Pink        | yes    | +         | p-, q-Values |
| Light Green | yes    | -         | p-, q-Values |

Dot Plots Dot Plots

Summary Table

SgFn vs Sg

SgPg vs Sg

SgPgFn vs Sg

SgPg vs SgFn

SgPgFn vs SgFn

SgPgFn vs SgPg

Coverage

SgPg vs Sg

Raw

Normalized

Log<sub>2</sub> Ratios

| Protein  | SgPg vs Sg             |                      |         |         | Raw     |         | Normalized |          | Description                                      | Log <sub>2</sub> Ratios |    |    |   |   |   |   |
|----------|------------------------|----------------------|---------|---------|---------|---------|------------|----------|--------------------------------------------------|-------------------------|----|----|---|---|---|---|
|          | Log <sub>2</sub> Ratio | Log <sub>2</sub> Sum | q-Value | p-Value | SgPg    | Sg      | SgPg       | Sg       |                                                  | -6                      | -4 | -2 | 0 | 2 | 4 | 6 |
| SGO_0237 | 1.319                  | 5.790                | 0.0038  | 0.0097  | 12.500  | 5.000   | 18.6383    | 5.2035   | ccpA; CcpA protein (proteinase)                  |                         |    |    |   |   |   |   |
|          |                        |                      |         |         | 14.000  | 11.500  | 19.9807    | 11.5000  |                                                  |                         |    |    |   |   |   |   |
| SGO_0240 |                        | 2.836                |         |         |         | 3.500   |            | 3.6425   | mvaD; diphosphomevalonate decarboxylase          |                         |    |    |   |   |   |   |
|          |                        |                      |         |         |         | 3.500   |            | 3.5000   |                                                  |                         |    |    |   |   |   |   |
| SGO_0242 |                        | 1.058                |         |         |         | 2.000   |            | 2.0814   | FMN-dependent dehydrogenase family protein       |                         |    |    |   |   |   |   |
|          |                        |                      |         |         |         |         |            |          |                                                  |                         |    |    |   |   |   |   |
| SGO_0243 |                        | 3.791                |         |         | 4.500   |         | 6.7098     |          | hydroxymethylglutaryl-CoA reductase, degradative |                         |    |    |   |   |   |   |
|          |                        |                      |         |         | 5.000   |         | 7.1360     |          |                                                  |                         |    |    |   |   |   |   |
| SGO_0244 | 2.252                  | 5.461                | 0.0003  | 0.0002  | 11.500  | 3.500   | 17.1472    | 3.6425   | hydroxymethylglutaryl-CoA synthase               |                         |    |    |   |   |   |   |
|          |                        |                      |         |         | 13.500  | 4.000   | 19.2671    | 4.0000   |                                                  |                         |    |    |   |   |   |   |
| SGO_0247 | -1.086                 | 11.004               | 0.0005  | 0.0006  | 213.500 | 709.000 | 318.3421   | 737.8631 | pfl; formate acetyltransferase                   |                         |    |    |   |   |   |   |
|          |                        |                      |         |         | 237.500 | 659.000 | 338.9584   | 659.0000 |                                                  |                         |    |    |   |   |   |   |
| SGO_0252 | -0.542                 | 4.617                | 0.0297  | 0.1218  | 4.500   | 6.500   | 6.7098     | 6.7646   | possible TetR-type transcriptional regulator     |                         |    |    |   |   |   |   |
|          |                        |                      |         |         | 2.500   | 7.500   | 3.5680     | 7.5000   |                                                  |                         |    |    |   |   |   |   |
| SGO_0253 |                        | 5.655                |         |         |         | 22.000  |            | 22.8956  | hypothetical protein SGO_0253                    |                         |    |    |   |   |   |   |
|          |                        |                      |         |         |         | 27.500  |            | 27.5000  |                                                  |                         |    |    |   |   |   |   |
| SGO_0254 | -0.810                 | 4.643                | 0.0299  | 0.1228  | 3.500   | 5.000   | 5.2187     | 5.2035   | helicase, RecD/TraA family                       |                         |    |    |   |   |   |   |
|          |                        |                      |         |         | 2.500   | 11.000  | 3.5680     | 11.0000  |                                                  |                         |    |    |   |   |   |   |
| SGO_0255 | -1.618                 | 7.630                | 0.0027  | 0.0065  | 16.000  | 84.500  | 23.8570    | 87.9400  | Signal peptidase I                               |                         |    |    |   |   |   |   |
|          |                        |                      |         |         | 17.000  | 62.000  | 24.2623    | 62.0000  |                                                  |                         |    |    |   |   |   |   |
| SGO_0256 |                        | 4.191                |         |         |         | 6.500   |            | 6.7646   | rnhC; ribonuclease HIII                          |                         |    |    |   |   |   |   |
|          |                        |                      |         |         |         | 11.500  |            | 11.5000  |                                                  |                         |    |    |   |   |   |   |
| SGO_0258 |                        | 1.585                |         |         |         |         |            |          | hypothetical protein SGO_0258                    |                         |    |    |   |   |   |   |
|          |                        |                      |         |         |         | 3.000   |            | 3.0000   |                                                  |                         |    |    |   |   |   |   |

- Show detected proteins only
- Show all proteins

Proteins found: 1179

Filter by category:

ABC Transporter

Test

Cutoff

q-Value

.005

p-Value

|             | Signif | Direction | Applies To   |
|-------------|--------|-----------|--------------|
| Red         | yes    | +         | ratios, bars |
| Yellow      | no     | n/a       | bars         |
| Green       | yes    | -         | ratios, bars |
| Pink        | yes    | +         | p-, q-Values |
| Light Green | yes    | -         | p-, q-Values |

Dot Plots Dot Plots

Summary Table SgFn vs Sg SgPg vs Sg SgPgFn vs Sg SgPg vs SgFn SgPgFn vs SgFn SgPgFn vs SgPg Coverage

| Protein  | SgPg vs Sg             |                      |         |         | Raw     |         | Normalized |          | Description                                            | Log <sub>2</sub> Ratios |    |    |   |   |   |   |
|----------|------------------------|----------------------|---------|---------|---------|---------|------------|----------|--------------------------------------------------------|-------------------------|----|----|---|---|---|---|
|          | Log <sub>2</sub> Ratio | Log <sub>2</sub> Sum | q-Value | p-Value | SgPg    | Sg      | SgPg       | Sg       |                                                        | -6                      | -4 | -2 | 0 | 2 | 4 | 6 |
| SGO_0260 | -0.106                 | 7.135                | 0.0376  | 0.1609  | 21.500  | 33.500  | 32.0579    | 34.8638  | DNA mismatch binding protein MutS2                     |                         |    |    |   |   |   |   |
|          |                        |                      |         |         | 25.000  | 38.000  | 35.6798    | 38.0000  |                                                        |                         |    |    |   |   |   |   |
| SGO_0261 |                        | 1.585                |         |         |         |         |            |          | acetyltransferase, GNAT family                         |                         |    |    |   |   |   |   |
|          |                        |                      |         |         |         | 3.000   |            | 3.0000   |                                                        |                         |    |    |   |   |   |   |
| SGO_0262 | 0.829                  | 7.073                | 0.0008  | 0.0012  | 30.500  | 24.500  | 45.4774    | 25.4974  | dipeptidase                                            |                         |    |    |   |   |   |   |
|          |                        |                      |         |         | 28.500  | 23.000  | 40.6750    | 23.0000  |                                                        |                         |    |    |   |   |   |   |
| SGO_0263 | 0.527                  | 7.504                | 0.0012  | 0.0020  | 34.500  | 34.000  | 51.4417    | 35.3841  | trx-1; thioredoxin                                     |                         |    |    |   |   |   |   |
|          |                        |                      |         |         | 39.000  | 39.000  | 55.6605    | 39.0000  |                                                        |                         |    |    |   |   |   |   |
| SGO_0268 | -1.945                 | 5.229                | 0.0268  | 0.1082  |         | 18.000  |            | 18.7328  | mechanosensitive transport protein                     |                         |    |    |   |   |   |   |
|          |                        |                      |         |         | 3.000   | 14.500  | 4.2816     | 14.5000  |                                                        |                         |    |    |   |   |   |   |
| SGO_0269 |                        | 4.194                |         |         |         | 7.500   |            | 7.8053   | hypothetical protein SGO_0269                          |                         |    |    |   |   |   |   |
|          |                        |                      |         |         |         | 10.500  |            | 10.5000  |                                                        |                         |    |    |   |   |   |   |
| SGO_0272 | -0.248                 | 6.402                | 0.0007  | 0.0009  | 13.000  | 22.500  | 19.3838    | 23.4160  | hypothetical protein SGO_0272                          |                         |    |    |   |   |   |   |
|          |                        |                      |         |         | 13.500  | 22.500  | 19.2671    | 22.5000  |                                                        |                         |    |    |   |   |   |   |
| SGO_0276 | 0.383                  | 9.225                | 0.0017  | 0.0034  | 114.000 | 132.500 | 169.9813   | 137.8940 | gdhA; glutamate dehydrogenase (NADP)                   |                         |    |    |   |   |   |   |
|          |                        |                      |         |         | 118.000 | 122.000 | 168.4088   | 122.0000 |                                                        |                         |    |    |   |   |   |   |
| SGO_0277 | -0.412                 | 5.671                | 0.0422  | 0.1820  | 9.000   | 11.500  | 13.4196    | 11.9682  | pyrA; Dihydroorotate dehydrogenase                     |                         |    |    |   |   |   |   |
|          |                        |                      |         |         | 6.000   | 17.000  | 8.5632     | 17.0000  |                                                        |                         |    |    |   |   |   |   |
| SGO_0278 |                        | 1.000                |         |         |         |         |            |          | msrA; Peptide methionine sulfoxide reductase msrA/msrB |                         |    |    |   |   |   |   |
|          |                        |                      |         |         |         | 2.000   |            | 2.0000   |                                                        |                         |    |    |   |   |   |   |
| SGO_0279 |                        | 3.902                |         |         |         | 11.000  |            | 11.4478  | lipoprotein, putative                                  |                         |    |    |   |   |   |   |
|          |                        |                      |         |         |         | 3.500   |            | 3.5000   |                                                        |                         |    |    |   |   |   |   |
| SGO_0280 | -0.591                 | 6.340                | 0.0170  | 0.0629  | 14.000  | 24.000  | 20.8749    | 24.9770  | trzA; ethylameline chlorohydrolase                     |                         |    |    |   |   |   |   |
|          |                        |                      |         |         | 8.500   | 23.000  | 12.1311    | 23.0000  |                                                        |                         |    |    |   |   |   |   |

Show detected proteins only  
 Show all proteins  
 Filter by category:

Proteins found: 1179

**Test**      **Cutoff**  
     

| Signif | Direction | Applies To   |
|--------|-----------|--------------|
| yes    | +         | ratios, bars |
| no     | n/a       | bars         |
| yes    | -         | ratios, bars |
| yes    | +         | p-, q-Values |
| yes    | -         | p-, q-Values |

[Dot Plots](#)

Summary Table

SgFn vs Sg

SgPg vs Sg

SgPgFn vs Sg

SgPg vs SgFn

SgPgFn vs SgFn

SgPgFn vs SgPg

Coverage

| Protein  | SgPg vs Sg             |                      |         |         | Raw     |         | Normalized |                                | Description                                      | Log <sub>2</sub> Ratios |    |    |   |   |   |   |
|----------|------------------------|----------------------|---------|---------|---------|---------|------------|--------------------------------|--------------------------------------------------|-------------------------|----|----|---|---|---|---|
|          | Log <sub>2</sub> Ratio | Log <sub>2</sub> Sum | q-Value | p-Value | SgPg    | Sg      | SgPg       | Sg                             |                                                  | -6                      | -4 | -2 | 0 | 2 | 4 | 6 |
| SGO_0282 |                        | 5.347                |         |         |         | 17.500  |            | 18.2124                        | cell wall polysaccharide biosynthesis protein    |                         |    |    |   |   |   |   |
|          |                        |                      |         |         |         | 22.500  |            | 22.5000                        |                                                  |                         |    |    |   |   |   |   |
| SGO_0284 |                        | 1.058                |         |         |         | 2.000   |            | 2.0814                         | transcriptional regulator                        |                         |    |    |   |   |   |   |
|          |                        |                      |         |         |         |         |            |                                |                                                  |                         |    |    |   |   |   |   |
| SGO_0286 |                        | 5.487                |         |         |         | 20.500  |            | 21.3345                        | DNA mismatch repair protein MutS, putative       |                         |    |    |   |   |   |   |
|          |                        |                      |         |         |         | 23.500  |            | 23.5000                        |                                                  |                         |    |    |   |   |   |   |
| SGO_0288 |                        | 3.007                |         |         | 3.000   |         | 4.4732     | GDLS-like lipase/acylhydrolase |                                                  |                         |    |    |   |   |   |   |
|          |                        |                      |         |         | 2.500   |         | 3.5680     |                                |                                                  |                         |    |    |   |   |   |   |
| SGO_0290 | -1.343                 | 5.871                | 0.0144  | 0.0519  | 4.500   | 13.500  | 6.7098     | 14.0496                        | copper -translocating P-type ATPase              |                         |    |    |   |   |   |   |
|          |                        |                      |         |         | 6.500   | 28.500  | 9.2768     | 28.5000                        |                                                  |                         |    |    |   |   |   |   |
| SGO_0291 | -1.402                 | 7.697                | 0.0008  | 0.0011  | 18.500  | 78.500  | 27.5847    | 81.6957                        | copper-translocating P-type ATPase               |                         |    |    |   |   |   |   |
|          |                        |                      |         |         | 20.500  | 69.000  | 29.2575    | 69.0000                        |                                                  |                         |    |    |   |   |   |   |
| SGO_0292 | 0.881                  | 9.177                | 0.0004  | 0.0005  | 120.000 | 100.000 | 178.9277   | 104.0710                       | spxB; pyruvate oxidase                           |                         |    |    |   |   |   |   |
|          |                        |                      |         |         | 137.500 | 99.500  | 196.2391   | 99.5000                        |                                                  |                         |    |    |   |   |   |   |
| SGO_0294 |                        | 4.271                |         |         |         | 7.500   |            | 7.8053                         | ABC transporter, putative                        |                         |    |    |   |   |   |   |
|          |                        |                      |         |         |         | 11.500  |            | 11.5000                        |                                                  |                         |    |    |   |   |   |   |
| SGO_0297 |                        | 2.459                |         |         |         |         |            |                                | 6-phospho-beta-glucosidase                       |                         |    |    |   |   |   |   |
|          |                        |                      |         |         |         | 5.500   |            | 5.5000                         |                                                  |                         |    |    |   |   |   |   |
| SGO_0299 |                        | 0.585                |         |         |         |         |            |                                | putative histidine kinase                        |                         |    |    |   |   |   |   |
|          |                        |                      |         |         |         | 1.500   |            | 1.5000                         |                                                  |                         |    |    |   |   |   |   |
| SGO_0301 |                        |                      |         |         |         |         |            |                                | ABC transporter ATP-binding protein-like protein |                         |    |    |   |   |   |   |
|          |                        |                      |         |         |         |         |            |                                |                                                  |                         |    |    |   |   |   |   |
| SGO_0306 |                        | 3.886                |         |         |         | 7.000   |            | 7.2850                         | ABC transporter ATP-binding protein-like protein |                         |    |    |   |   |   |   |
|          |                        |                      |         |         |         | 7.500   |            | 7.5000                         |                                                  |                         |    |    |   |   |   |   |

- Show detected proteins only
- Show all proteins

Proteins found:  
1179

Filter by category:

ABC Transporter

Test

Cutoff

q-Value

.005

p-Value

|             | Signif | Direction | Applies To   |
|-------------|--------|-----------|--------------|
| Red         | yes    | +         | ratios, bars |
| Yellow      | no     | n/a       | bars         |
| Green       | yes    | -         | ratios, bars |
| Pink        | yes    | +         | p-, q-Values |
| Light Green | yes    | -         | p-, q-Values |

Dot Plots Dot Plots

Summary Table SgFn vs Sg SgPg vs Sg SgPgFn vs Sg SgPg vs SgFn SgPgFn vs SgFn SgPgFn vs SgPg Coverage

| Protein  | SgPg vs Sg             |                      |         |         | Raw     |         | Normalized |          | Description                                                                   | Log <sub>2</sub> Ratios |    |    |   |   |   |   |
|----------|------------------------|----------------------|---------|---------|---------|---------|------------|----------|-------------------------------------------------------------------------------|-------------------------|----|----|---|---|---|---|
|          | Log <sub>2</sub> Ratio | Log <sub>2</sub> Sum | q-Value | p-Value | SgPg    | Sg      | SgPg       | Sg       |                                                                               | -6                      | -4 | -2 | 0 | 2 | 4 | 6 |
| SGO_0307 |                        | 2.718                |         |         |         | 2.000   |            | 2.0814   | pabB; chorismate binding enzyme                                               |                         |    |    |   |   |   |   |
|          |                        |                      |         |         |         | 4.500   |            | 4.5000   |                                                                               |                         |    |    |   |   |   |   |
| SGO_0310 | 1.387                  | 3.401                | 0.0144  | 0.0522  | 4.000   | 2.500   | 5.9643     | 2.6018   | metE; 5-methyltetrahydropteroyltriglutamate--homocysteine S-methyltransferase |                         |    |    |   |   |   |   |
|          |                        |                      |         |         |         | 2.000   |            | 2.0000   |                                                                               |                         |    |    |   |   |   |   |
| SGO_0312 | 0.735                  | 11.059               | 0.0001  | 0.0000  | 441.500 | 387.000 | 658.3047   | 402.7546 | xfp; D-xylulose 5-phosphate/D-fructose 6-phosphate phosphoketolase            |                         |    |    |   |   |   |   |
|          |                        |                      |         |         | 472.500 | 398.000 | 674.3489   | 398.0000 |                                                                               |                         |    |    |   |   |   |   |
| SGO_0317 |                        | 8.639                |         |         |         | 177.500 |            | 184.7260 | LPXTG cell wall surface protein, serine protease, subtilase family            |                         |    |    |   |   |   |   |
|          |                        |                      |         |         |         | 214.000 |            | 214.0000 |                                                                               |                         |    |    |   |   |   |   |
| SGO_0321 | 0.887                  | 6.560                | 0.0098  | 0.0322  | 18.000  | 11.500  | 26.8391    | 11.9682  | polypeptide deformylase                                                       |                         |    |    |   |   |   |   |
|          |                        |                      |         |         | 23.500  | 22.000  | 33.5390    | 22.0000  |                                                                               |                         |    |    |   |   |   |   |
| SGO_0323 | 0.576                  | 2.317                |         |         | 2.000   |         | 2.9821     |          | pseudouridine synthase rRNA-specific                                          |                         |    |    |   |   |   |   |
|          |                        |                      |         |         |         | 2.000   |            | 2.0000   |                                                                               |                         |    |    |   |   |   |   |
| SGO_0324 |                        | 5.618                |         |         |         | 27.500  |            | 28.6195  | hypothetical protein SGO_0324                                                 |                         |    |    |   |   |   |   |
|          |                        |                      |         |         |         | 20.500  |            | 20.5000  |                                                                               |                         |    |    |   |   |   |   |
| SGO_0325 |                        | 3.058                |         |         |         | 8.000   |            | 8.3257   | probable membrane protein, putative                                           |                         |    |    |   |   |   |   |
|          |                        |                      |         |         |         |         |            |          |                                                                               |                         |    |    |   |   |   |   |
| SGO_0326 | -3.296                 | 6.752                | 0.0097  | 0.0317  | 3.500   | 51.500  | 5.2187     | 53.5965  | probable membrane protein, putative                                           |                         |    |    |   |   |   |   |
|          |                        |                      |         |         |         | 49.000  |            | 49.0000  |                                                                               |                         |    |    |   |   |   |   |
| SGO_0327 | -0.856                 | 3.376                | 0.0346  | 0.1462  | 1.500   | 3.500   | 2.2366     | 3.6425   | Lipopolysaccharide N-acetylglucosaminyltransferase                            |                         |    |    |   |   |   |   |
|          |                        |                      |         |         |         | 4.500   |            | 4.5000   |                                                                               |                         |    |    |   |   |   |   |
| SGO_0328 |                        | 4.383                |         |         |         | 9.000   |            | 9.3664   | transmembrane protein, putative                                               |                         |    |    |   |   |   |   |
|          |                        |                      |         |         |         | 11.500  |            | 11.5000  |                                                                               |                         |    |    |   |   |   |   |
| SGO_0329 | -4.732                 | 6.866                | 0.0187  | 0.0718  |         | 61.000  |            | 63.4833  | hypothetical protein SGO_0329                                                 |                         |    |    |   |   |   |   |
|          |                        |                      |         |         | 1.500   | 51.000  | 2.1408     | 51.0000  |                                                                               |                         |    |    |   |   |   |   |

- Show detected proteins only
- Show all proteins

Proteins found: 1179

Filter by category:  
ABC Transporter

Test

Cutoff

q-Value

.005

p-Value

|             | Signif | Direction | Applies To   |
|-------------|--------|-----------|--------------|
| Red         | yes    | +         | ratios, bars |
| Yellow      | no     | n/a       | bars         |
| Green       | yes    | -         | ratios, bars |
| Pink        | yes    | +         | p-, q-Values |
| Light Green | yes    | -         | p-, q-Values |

Dot Plots Dot Plots

Summary Table

SgFn vs Sg

SgPg vs Sg

SgPgFn vs Sg

SgPg vs SgFn

SgPgFn vs SgFn

SgPgFn vs SgPg

Coverage

| Protein  | SgPg vs Sg             |                      |         |         | Raw    |         | Normalized |          | Description                                     | Log <sub>2</sub> Ratios |    |    |   |   |   |   |
|----------|------------------------|----------------------|---------|---------|--------|---------|------------|----------|-------------------------------------------------|-------------------------|----|----|---|---|---|---|
|          | Log <sub>2</sub> Ratio | Log <sub>2</sub> Sum | q-Value | p-Value | SgPg   | Sg      | SgPg       | Sg       |                                                 | -6                      | -4 | -2 | 0 | 2 | 4 | 6 |
| SGO_0330 |                        | 5.031                |         |         |        | 17.000  |            | 17.6921  | hypothetical protein SGO_0330                   |                         |    |    |   |   |   |   |
|          |                        |                      |         |         |        | 15.000  |            | 15.0000  |                                                 |                         |    |    |   |   |   |   |
| SGO_0331 |                        | 5.455                |         |         |        | 21.500  |            | 22.3753  | hypothetical protein SGO_0331                   |                         |    |    |   |   |   |   |
|          |                        |                      |         |         |        | 21.500  |            | 21.5000  |                                                 |                         |    |    |   |   |   |   |
| SGO_0332 |                        | 5.722                |         |         |        | 19.000  |            | 19.7735  | hypothetical protein SGO_0332                   |                         |    |    |   |   |   |   |
|          |                        |                      |         |         |        | 33.000  |            | 33.0000  |                                                 |                         |    |    |   |   |   |   |
| SGO_0333 | -0.089                 | 8.419                | 0.0644  | 0.2989  | 55.000 | 77.500  | 82.0085    | 80.6550  | rpsO; ribosomal protein S15                     |                         |    |    |   |   |   |   |
|          |                        |                      |         |         | 58.500 | 96.000  | 83.4908    | 96.0000  |                                                 |                         |    |    |   |   |   |   |
| SGO_0337 | 2.161                  | 3.452                |         |         | 6.000  |         | 8.9464     |          | trx-2; thioredoxin                              |                         |    |    |   |   |   |   |
|          |                        |                      |         |         |        | 2.000   |            | 2.0000   |                                                 |                         |    |    |   |   |   |   |
| SGO_0339 | -0.424                 | 2.389                |         |         | 1.500  |         | 2.2366     |          | hypothetical protein SGO_0339                   |                         |    |    |   |   |   |   |
|          |                        |                      |         |         |        | 3.000   |            | 3.0000   |                                                 |                         |    |    |   |   |   |   |
| SGO_0342 | 0.572                  | 7.982                | 0.0036  | 0.0093  | 46.000 | 47.500  | 68.5889    | 49.4337  | pepF-2; oligoendopeptidase                      |                         |    |    |   |   |   |   |
|          |                        |                      |         |         | 58.000 | 52.000  | 82.7772    | 52.0000  |                                                 |                         |    |    |   |   |   |   |
| SGO_0344 | -0.124                 | 9.039                | 0.0049  | 0.0139  | 85.500 | 128.500 | 127.4860   | 133.7312 | pnpA; polyribonucleotide nucleotidyltransferase |                         |    |    |   |   |   |   |
|          |                        |                      |         |         | 87.000 | 140.500 | 124.1658   | 140.5000 |                                                 |                         |    |    |   |   |   |   |
| SGO_0345 |                        | 3.663                |         |         |        | 4.000   |            | 4.1628   | cysE; serine O-acetyltransferase                |                         |    |    |   |   |   |   |
|          |                        |                      |         |         |        | 8.500   |            | 8.5000   |                                                 |                         |    |    |   |   |   |   |
| SGO_0348 | -1.348                 | 4.537                | 0.0036  | 0.0090  | 3.500  |         | 5.2187     |          | reductase                                       |                         |    |    |   |   |   |   |
|          |                        |                      |         |         | 3.500  | 13.000  | 4.9952     | 13.0000  |                                                 |                         |    |    |   |   |   |   |
| SGO_0349 | 0.002                  | 6.611                | 0.1832  | 0.9875  | 16.500 | 22.000  | 24.6026    | 22.8956  | cysS; cysteinyl-tRNA synthetase                 |                         |    |    |   |   |   |   |
|          |                        |                      |         |         | 17.000 | 26.000  | 24.2623    | 26.0000  |                                                 |                         |    |    |   |   |   |   |
| SGO_0352 | -0.745                 | 7.834                | 0.0012  | 0.0022  | 31.500 | 66.000  | 46.9685    | 68.6868  | ABC transporter, ATP-binding protein SP1580     |                         |    |    |   |   |   |   |
|          |                        |                      |         |         | 27.000 | 74.000  | 38.5342    | 74.0000  |                                                 |                         |    |    |   |   |   |   |

- Show detected proteins only
- Show all proteins

Proteins found: 1179

Filter by category:

ABC Transporter

Test

Cutoff

q-Value

.005

p-Value

|             | Signif | Direction | Applies To   |
|-------------|--------|-----------|--------------|
| Red         | yes    | +         | ratios, bars |
| Yellow      | no     | n/a       | bars         |
| Green       | yes    | -         | ratios, bars |
| Pink        | yes    | +         | p-, q-Values |
| Light Green | yes    | -         | p-, q-Values |

Dot Plots Dot Plots



Summary Table

SgFn vs Sg

SgPg vs Sg

SgPgFn vs Sg

SgPg vs SgFn

SgPgFn vs SgFn

SgPgFn vs SgPg

Coverage

| Protein  | SgPg vs Sg             |                      |         |         | Raw     |         | Normalized |          | Description                                  | Log <sub>2</sub> Ratios |    |    |   |   |   |   |
|----------|------------------------|----------------------|---------|---------|---------|---------|------------|----------|----------------------------------------------|-------------------------|----|----|---|---|---|---|
|          | Log <sub>2</sub> Ratio | Log <sub>2</sub> Sum | q-Value | p-Value | SgPg    | Sg      | SgPg       | Sg       |                                              | -6                      | -4 | -2 | 0 | 2 | 4 | 6 |
| SGO_0353 | 0.905                  | 4.160                | 0.0171  | 0.0639  | 5.000   | 3.500   | 7.4553     | 3.6425   | transport protein                            |                         |    |    |   |   |   |   |
|          |                        |                      |         |         | 3.000   | 2.500   | 4.2816     | 2.5000   |                                              |                         |    |    |   |   |   |   |
| SGO_0355 | 0.966                  | 5.720                | 0.0046  | 0.0127  | 10.000  | 7.500   | 14.9106    | 7.8053   | RNA methyltransferase, TrmH family, group 3  |                         |    |    |   |   |   |   |
|          |                        |                      |         |         | 14.000  | 10.000  | 19.9807    | 10.0000  |                                              |                         |    |    |   |   |   |   |
| SGO_0356 |                        | 1.380                |         |         |         | 2.500   |            | 2.6018   | hypothetical protein SGO_0356                |                         |    |    |   |   |   |   |
|          |                        |                      |         |         |         |         |            |          |                                              |                         |    |    |   |   |   |   |
| SGO_0357 | 1.449                  | 7.485                | 0.0013  | 0.0025  | 46.000  | 17.500  | 68.5889    | 18.2124  | degV; DegV family fatty acid binding protein |                         |    |    |   |   |   |   |
|          |                        |                      |         |         | 43.000  | 31.000  | 61.3693    | 31.0000  |                                              |                         |    |    |   |   |   |   |
| SGO_0358 | 0.122                  | 9.371                | 0.0784  | 0.3765  | 117.500 | 133.000 | 175.2000   | 138.4144 | rplM; ribosomal protein L13                  |                         |    |    |   |   |   |   |
|          |                        |                      |         |         | 118.000 | 180.000 | 168.4088   | 180.0000 |                                              |                         |    |    |   |   |   |   |
| SGO_0359 | -0.466                 | 8.319                | 0.0137  | 0.0485  | 43.000  | 76.000  | 64.1157    | 79.0939  | rpsI; ribosomal protein S9                   |                         |    |    |   |   |   |   |
|          |                        |                      |         |         | 48.500  | 107.000 | 69.2189    | 107.0000 |                                              |                         |    |    |   |   |   |   |
| SGO_0361 | -0.553                 | 4.546                | 0.0329  | 0.1384  | 4.000   | 8.000   | 5.9643     | 8.3257   | immunity repressor protein                   |                         |    |    |   |   |   |   |
|          |                        |                      |         |         | 2.500   | 5.500   | 3.5680     | 5.5000   |                                              |                         |    |    |   |   |   |   |
| SGO_0368 |                        | 2.345                |         |         |         | 2.000   |            | 2.0814   | merA; mercury(II) reductase                  |                         |    |    |   |   |   |   |
|          |                        |                      |         |         |         | 3.000   |            | 3.0000   |                                              |                         |    |    |   |   |   |   |
| SGO_0371 |                        | 2.000                |         |         |         |         |            |          | putative transcriptional regulator           |                         |    |    |   |   |   |   |
|          |                        |                      |         |         |         | 4.000   |            | 4.0000   |                                              |                         |    |    |   |   |   |   |
| SGO_0372 | 1.166                  | 6.049                | 0.0026  | 0.0062  | 15.000  | 13.000  | 22.3660    | 13.5292  | malate oxidoreductase                        |                         |    |    |   |   |   |   |
|          |                        |                      |         |         | 16.000  | 7.500   | 22.8351    | 7.5000   |                                              |                         |    |    |   |   |   |   |
| SGO_0374 | -0.169                 | 6.358                | 0.0363  | 0.1547  | 12.000  | 22.500  | 17.8928    | 23.4160  | Response regulator of the LytR/AlgR family   |                         |    |    |   |   |   |   |
|          |                        |                      |         |         | 14.500  | 20.000  | 20.6943    | 20.0000  |                                              |                         |    |    |   |   |   |   |
| SGO_0376 |                        | 3.322                |         |         |         |         |            |          | ABC transporter ATP-binding protein          |                         |    |    |   |   |   |   |
|          |                        |                      |         |         |         | 10.000  |            | 10.0000  |                                              |                         |    |    |   |   |   |   |

- Show detected proteins only
- Show all proteins

Proteins found: 1179

Filter by category:

ABC Transporter

Test

Cutoff

q-Value

.005

p-Value

|             | Signif | Direction | Applies To   |
|-------------|--------|-----------|--------------|
| Red         | yes    | +         | ratios, bars |
| Yellow      | no     | n/a       | bars         |
| Green       | yes    | -         | ratios, bars |
| Pink        | yes    | +         | p-, q-Values |
| Light Green | yes    | -         | p-, q-Values |

Dot Plots Dot Plots

Summary Table

SgFn vs Sg

SgPg vs Sg

SgPgFn vs Sg

SgPg vs SgFn

SgPgFn vs SgFn

SgPgFn vs SgPg

Coverage

SgPg vs Sg

Raw

Normalized

Log<sub>2</sub> Ratios

| Protein  | SgPg vs Sg             |                      |         |         | Raw    |        | Normalized |         | Description                                                   | Log <sub>2</sub> Ratios |    |    |   |   |   |   |
|----------|------------------------|----------------------|---------|---------|--------|--------|------------|---------|---------------------------------------------------------------|-------------------------|----|----|---|---|---|---|
|          | Log <sub>2</sub> Ratio | Log <sub>2</sub> Sum | q-Value | p-Value | SgPg   | Sg     | SgPg       | Sg      |                                                               | -6                      | -4 | -2 | 0 | 2 | 4 | 6 |
| SGO_0378 |                        |                      |         |         |        |        |            |         | hypothetical protein SGO_0378                                 |                         |    |    |   |   |   |   |
| SGO_0379 |                        | 4.594                |         |         |        | 3.500  |            | 3.6425  | Protein of unknown function (DUF421) family                   |                         |    |    |   |   |   |   |
|          |                        |                      |         |         |        | 20.500 |            | 20.5000 |                                                               |                         |    |    |   |   |   |   |
| SGO_0380 |                        | 3.459                |         |         |        |        |            |         | hypothetical protein SGO_0380                                 |                         |    |    |   |   |   |   |
|          |                        |                      |         |         |        | 11.000 |            | 11.0000 |                                                               |                         |    |    |   |   |   |   |
| SGO_0384 | -0.385                 | 5.773                | 0.0578  | 0.2637  | 6.500  | 10.500 | 9.6919     | 10.9275 | putative carboxylate-amine/thiol ligase                       |                         |    |    |   |   |   |   |
|          |                        |                      |         |         |        | 9.500  | 20.500     | 13.5583 |                                                               |                         |    |    |   |   |   |   |
| SGO_0385 |                        | 6.351                |         |         |        | 39.500 |            | 41.1080 | exo-beta-D-fructosidase                                       |                         |    |    |   |   |   |   |
|          |                        |                      |         |         |        | 40.500 |            | 40.5000 |                                                               |                         |    |    |   |   |   |   |
| SGO_0387 |                        | 4.194                |         |         |        | 7.500  |            | 7.8053  | hypothetical protein SGO_0387                                 |                         |    |    |   |   |   |   |
|          |                        |                      |         |         |        | 10.500 |            | 10.5000 |                                                               |                         |    |    |   |   |   |   |
| SGO_0388 |                        | 6.251                |         |         |        | 29.000 |            | 30.1806 | LPXTG cell wall surface protein, zinc carboxypeptidase family |                         |    |    |   |   |   |   |
|          |                        |                      |         |         |        | 46.000 |            | 46.0000 |                                                               |                         |    |    |   |   |   |   |
| SGO_0389 |                        | 1.000                |         |         |        |        |            |         | possible phosphoserine phosphatase                            |                         |    |    |   |   |   |   |
|          |                        |                      |         |         |        | 2.000  |            | 2.0000  |                                                               |                         |    |    |   |   |   |   |
| SGO_0390 | 1.564                  | 8.027                | 0.0010  | 0.0015  | 72.000 | 30.000 | 107.3566   | 31.2213 | glycerol-3-phosphate dehydrogenase (NAD (P)+)                 |                         |    |    |   |   |   |   |
|          |                        |                      |         |         |        | 61.500 | 34.500     | 87.7724 |                                                               |                         |    |    |   |   |   |   |
| SGO_0392 | 2.875                  | 5.566                | 0.0232  | 0.0922  | 13.000 |        | 19.3838    |         | phosphoglycerate mutase                                       |                         |    |    |   |   |   |   |
|          |                        |                      |         |         |        | 17.500 | 3.000      | 24.9759 |                                                               |                         |    |    |   |   |   |   |
| SGO_0393 |                        | 5.105                |         |         |        | 10.000 |            | 10.4071 | D-alanyl-D-alanine carboxypeptidase                           |                         |    |    |   |   |   |   |
|          |                        |                      |         |         |        | 24.000 |            | 24.0000 |                                                               |                         |    |    |   |   |   |   |
| SGO_0396 |                        | 2.322                |         |         |        |        |            |         | Transcriptional regulator, PadR family                        |                         |    |    |   |   |   |   |
|          |                        |                      |         |         |        | 5.000  |            | 5.0000  |                                                               |                         |    |    |   |   |   |   |

- Show detected proteins only  
 Show all proteins

Proteins found:  
1179

Filter by category:

ABC Transporter

Test

Cutoff

q-Value

.005

p-Value

|             | Signif | Direction | Applies To   |
|-------------|--------|-----------|--------------|
| Red         | yes    | +         | ratios, bars |
| Yellow      | no     | n/a       | bars         |
| Green       | yes    | -         | ratios, bars |
| Pink        | yes    | +         | p-, q-Values |
| Light Green | yes    | -         | p-, q-Values |

Dot Plots  Dot Plots

Summary Table

SgFn vs Sg

SgPg vs Sg

SgPgFn vs Sg

SgPg vs SgFn

SgPgFn vs SgFn

SgPgFn vs SgPg

Coverage

| Protein  | SgPg vs Sg             |                      |         |         | Raw     |         | Normalized |          | Description                                          | Log <sub>2</sub> Ratios |    |    |   |   |
|----------|------------------------|----------------------|---------|---------|---------|---------|------------|----------|------------------------------------------------------|-------------------------|----|----|---|---|
|          | Log <sub>2</sub> Ratio | Log <sub>2</sub> Sum | q-Value | p-Value | SgPg    | Sg      | SgPg       | Sg       |                                                      | -6                      | -4 | -2 | 0 | 2 |
| SGO_0398 | -2.695                 | 6.928                | 0.0017  | 0.0033  | 7.500   | 58.500  | 11.1830    | 60.8815  | ABC transporter ATP-binding protein                  |                         |    |    |   |   |
|          |                        |                      |         |         | 4.000   | 44.000  | 5.7088     | 44.0000  |                                                      |                         |    |    |   |   |
| SGO_0400 |                        | 3.423                |         |         |         | 5.500   |            | 5.7239   | hrcA; heat-inducible transcription repressor<br>HrcA |                         |    |    |   |   |
|          |                        |                      |         |         |         | 5.000   |            | 5.0000   |                                                      |                         |    |    |   |   |
| SGO_0401 | 0.166                  | 6.709                | 0.1742  | 0.9248  | 14.500  | 14.000  | 21.6204    | 14.5699  | grpE; co-chaperone GrpE                              |                         |    |    |   |   |
|          |                        |                      |         |         | 22.000  | 37.000  | 31.3983    | 37.0000  |                                                      |                         |    |    |   |   |
| SGO_0402 | 0.461                  | 11.142               | 0.0013  | 0.0022  | 424.500 | 434.500 | 632.9566   | 452.1883 | dnaK; DnaK chaperone protein                         |                         |    |    |   |   |
|          |                        |                      |         |         | 473.000 | 499.000 | 675.0625   | 499.0000 |                                                      |                         |    |    |   |   |
| SGO_0404 | -2.045                 | 7.970                | 0.0057  | 0.0167  | 16.000  | 71.000  | 23.8570    | 73.8904  | dnaJ; DnaJ chaperone protein                         |                         |    |    |   |   |
|          |                        |                      |         |         | 16.500  | 129.500 | 23.5487    | 129.5000 |                                                      |                         |    |    |   |   |
| SGO_0407 | -0.231                 | 2.696                |         |         | 2.000   |         | 2.9821     |          | truA; tRNA pseudouridine synthase A                  |                         |    |    |   |   |
|          |                        |                      |         |         |         | 3.500   |            | 3.5000   |                                                      |                         |    |    |   |   |
| SGO_0408 |                        | 8.890                |         |         |         | 232.000 |            | 241.4446 | zmpB; zinc metalloproteinase B                       |                         |    |    |   |   |
|          |                        |                      |         |         |         | 233.000 |            | 233.0000 |                                                      |                         |    |    |   |   |
| SGO_0409 | 1.598                  | 3.467                | 0.0233  | 0.0929  | 3.500   | 1.500   | 5.2187     | 1.5611   | pyridoxine kinase                                    |                         |    |    |   |   |
|          |                        |                      |         |         | 3.000   |         | 4.2816     |          |                                                      |                         |    |    |   |   |
| SGO_0411 |                        | 4.454                |         |         | 8.000   |         | 11.9285    |          | conserved hypothetical protein TIGR01440             |                         |    |    |   |   |
|          |                        |                      |         |         | 7.000   |         | 9.9904     |          |                                                      |                         |    |    |   |   |
| SGO_0412 | 0.831                  | 11.109               | 0.0005  | 0.0006  | 463.000 | 353.500 | 690.3625   | 367.8908 | tig; trigger factor                                  |                         |    |    |   |   |
|          |                        |                      |         |         | 506.000 | 428.500 | 722.1599   | 428.5000 |                                                      |                         |    |    |   |   |
| SGO_0413 | 2.022                  | 7.008                | 0.0040  | 0.0107  | 27.000  | 15.500  | 40.2587    | 16.1310  | DNA-directed RNA polymerase delta chain              |                         |    |    |   |   |
|          |                        |                      |         |         | 44.000  | 9.500   | 62.7965    | 9.5000   |                                                      |                         |    |    |   |   |
| SGO_0415 | -1.044                 | 10.702               | 0.0005  | 0.0006  | 184.000 | 569.500 | 274.3557   | 592.6841 | secA; preprotein translocase, SecA subunit           |                         |    |    |   |   |
|          |                        |                      |         |         | 188.500 | 529.500 | 269.0260   | 529.5000 |                                                      |                         |    |    |   |   |

- Show detected proteins only
- Show all proteins

Proteins found:  
1179

Filter by category:

ABC Transporter

Test

Cutoff

q-Value

p-Value

.005

| Signif | Direction | Applies To   |
|--------|-----------|--------------|
| yes    | +         | ratios, bars |
| no     | n/a       | bars         |
| yes    | -         | ratios, bars |
| yes    | +         | p-, q-Values |
| yes    | -         | p-, q-Values |

Dot Plots Dot Plots

Summary Table SgFn vs Sg SgPg vs Sg SgPgFn vs Sg SgPg vs SgFn SgPgFn vs SgFn SgPgFn vs SgPg Coverage

| Protein  | SgPg vs Sg             |                      |         |         | Raw     |         | Normalized |          | Description                                            | Log <sub>2</sub> Ratios |    |    |   |   |
|----------|------------------------|----------------------|---------|---------|---------|---------|------------|----------|--------------------------------------------------------|-------------------------|----|----|---|---|
|          | Log <sub>2</sub> Ratio | Log <sub>2</sub> Sum | q-Value | p-Value | SgPg    | Sg      | SgPg       | Sg       |                                                        | -6                      | -4 | -2 | 0 | 2 |
| SGO_0416 | 0.754                  | 7.228                | 0.0087  | 0.0280  | 37.000  | 24.000  | 55.1694    | 24.9770  | phospho-2-dehydro-3-deoxyheptonate aldolase            |                         |    |    |   |   |
|          |                        |                      |         |         | 27.500  | 30.500  | 39.2478    | 30.5000  |                                                        |                         |    |    |   |   |
| SGO_0418 |                        | 3.870                |         |         | 5.500   |         | 8.2009     |          | alr; alanine racemase                                  |                         |    |    |   |   |
|          |                        |                      |         |         | 4.500   |         | 6.4224     |          |                                                        |                         |    |    |   |   |
| SGO_0425 | 1.326                  | 2.868                |         |         | 3.500   | 2.000   | 5.2187     | 2.0814   | ansB; asparaginase                                     |                         |    |    |   |   |
|          |                        |                      |         |         |         |         |            |          |                                                        |                         |    |    |   |   |
| SGO_0426 | -0.316                 | 5.480                | 0.0492  | 0.2190  | 7.500   | 9.500   | 11.1830    | 9.8867   | Cof family protein                                     |                         |    |    |   |   |
|          |                        |                      |         |         | 6.000   | 15.000  | 8.5632     | 15.0000  |                                                        |                         |    |    |   |   |
| SGO_0427 | 1.411                  | 6.151                | 0.0006  | 0.0008  | 16.000  | 9.500   | 23.8570    | 9.8867   | universal stress protein family                        |                         |    |    |   |   |
|          |                        |                      |         |         | 19.500  | 9.500   | 27.8303    | 9.5000   |                                                        |                         |    |    |   |   |
| SGO_0429 | -0.208                 | 9.238                | 0.0673  | 0.3144  | 112.500 | 162.000 | 167.7447   | 168.5950 | aspartate transaminase                                 |                         |    |    |   |   |
|          |                        |                      |         |         | 80.500  | 152.500 | 114.8891   | 152.5000 |                                                        |                         |    |    |   |   |
| SGO_0430 |                        | 9.382                |         |         |         | 314.000 |            | 326.7828 | LPXTG cell wall surface protein                        |                         |    |    |   |   |
|          |                        |                      |         |         |         | 340.500 |            | 340.5000 |                                                        |                         |    |    |   |   |
| SGO_0431 | 0.147                  | 5.310                | 0.1464  | 0.7587  | 6.500   | 6.500   | 9.6919     | 6.7646   | GTP-sensing transcriptional pleiotropic repressor codY |                         |    |    |   |   |
|          |                        |                      |         |         | 7.500   | 12.500  | 10.7040    | 12.5000  |                                                        |                         |    |    |   |   |
| SGO_0432 | 0.535                  | 7.190                | 0.0066  | 0.0198  | 31.000  | 32.500  | 46.2230    | 33.8231  | entB; isochorismatase family protein                   |                         |    |    |   |   |
|          |                        |                      |         |         | 28.000  | 26.000  | 39.9614    | 26.0000  |                                                        |                         |    |    |   |   |
| SGO_0434 | -0.559                 | 7.587                | 0.0084  | 0.0265  | 23.000  | 49.000  | 34.2945    | 50.9948  | aspS-2; aspartyl-tRNA synthetase                       |                         |    |    |   |   |
|          |                        |                      |         |         | 30.500  | 63.500  | 43.5294    | 63.5000  |                                                        |                         |    |    |   |   |
| SGO_0435 | -0.003                 | 6.327                | 0.1779  | 0.9549  | 12.500  | 17.500  | 18.6383    | 18.2124  | gatC; glutamyl-tRNA(Gln) amidotransferase, C subunit   |                         |    |    |   |   |
|          |                        |                      |         |         | 15.000  | 22.000  | 21.4079    | 22.0000  |                                                        |                         |    |    |   |   |
| SGO_0436 | -0.300                 | 9.301                | 0.0091  | 0.0294  | 99.500  | 179.500 | 148.3608   | 186.8074 | gatA; glutamyl-tRNA(Gln) amidotransferase, A subunit   |                         |    |    |   |   |
|          |                        |                      |         |         | 94.000  | 161.500 | 134.1562   | 161.5000 |                                                        |                         |    |    |   |   |

- Show detected proteins only
- Show all proteins

Proteins found: 1179

Filter by category:  
ABC Transporter

**Test** **Cutoff**

| Signif | Direction | Applies To   |
|--------|-----------|--------------|
| yes    | +         | ratios, bars |
| no     | n/a       | bars         |
| yes    | -         | ratios, bars |
| yes    | +         | p-, q-Values |
| yes    | -         | p-, q-Values |

Dot Plots Dot Plots

Summary Table

SgFn vs Sg

SgPg vs Sg

SgPgFn vs Sg

SgPg vs SgFn

SgPgFn vs SgFn

SgPgFn vs SgPg

Coverage

| Protein  | SgPg vs Sg             |                      |         |         | Raw     |         | Normalized |          | Description                                                    | Log <sub>2</sub> Ratios |    |    |   |   |
|----------|------------------------|----------------------|---------|---------|---------|---------|------------|----------|----------------------------------------------------------------|-------------------------|----|----|---|---|
|          | Log <sub>2</sub> Ratio | Log <sub>2</sub> Sum | q-Value | p-Value | SgPg    | Sg      | SgPg       | Sg       |                                                                | -6                      | -4 | -2 | 0 | 2 |
| SGO_0437 | 0.549                  | 8.996                | 0.0018  | 0.0038  | 95.000  | 100.000 | 141.6511   | 104.0710 | gatB; glutamyl-tRNA(Gln) amidotransferase, B subunit           |                         |    |    |   |   |
|          |                        |                      |         |         | 113.500 | 103.000 | 161.9865   | 103.0000 |                                                                |                         |    |    |   |   |
| SGO_0440 | 1.808                  | 4.908                | 0.0017  | 0.0035  | 9.000   | 3.000   | 13.4196    | 3.1221   | L-idoitol 2-dehydrogenase BH3949                               |                         |    |    |   |   |
|          |                        |                      |         |         | 7.000   | 3.500   | 9.9904     | 3.5000   |                                                                |                         |    |    |   |   |
| SGO_0444 |                        | 3.087                |         |         |         |         |            |          | HAD superfamily (subfamily IIIA) phosphatase, TIGR01668        |                         |    |    |   |   |
|          |                        |                      |         |         |         | 8.500   |            | 8.5000   |                                                                |                         |    |    |   |   |
| SGO_0445 | 0.374                  | 6.781                | 0.0137  | 0.0486  | 23.000  | 21.000  | 34.2945    | 21.8549  | GTP-binding protein                                            |                         |    |    |   |   |
|          |                        |                      |         |         | 19.500  | 26.000  | 27.8303    | 26.0000  |                                                                |                         |    |    |   |   |
| SGO_0446 |                        | 3.585                |         |         |         |         |            |          | conserved hypothetical protein TIGR00253                       |                         |    |    |   |   |
|          |                        |                      |         |         |         | 12.000  |            | 12.0000  |                                                                |                         |    |    |   |   |
| SGO_0447 | -0.822                 | 5.135                | 0.0144  | 0.0518  | 6.000   | 10.000  | 8.9464     | 10.4071  | nadD; nicotinate (nicotinamide) nucleotide adenylyltransferase |                         |    |    |   |   |
|          |                        |                      |         |         | 3.000   | 11.500  | 4.2816     | 11.5000  |                                                                |                         |    |    |   |   |
| SGO_0448 | 0.170                  | 5.137                | 0.1330  | 0.6801  | 6.500   | 10.500  | 9.6919     | 10.9275  | conserved hypothetical protein TIGR00488                       |                         |    |    |   |   |
|          |                        |                      |         |         | 6.000   | 6.000   | 8.5632     | 6.0000   |                                                                |                         |    |    |   |   |
| SGO_0449 |                        | 1.585                |         |         |         |         |            |          | isochorismatase family protein                                 |                         |    |    |   |   |
|          |                        |                      |         |         |         | 3.000   |            | 3.0000   |                                                                |                         |    |    |   |   |
| SGO_0450 | 1.018                  | 4.508                | 0.0199  | 0.0773  | 6.500   |         | 9.6919     |          | iojap-related protein                                          |                         |    |    |   |   |
|          |                        |                      |         |         | 6.000   | 4.500   | 8.5632     | 4.5000   |                                                                |                         |    |    |   |   |
| SGO_0451 |                        | 3.791                |         |         | 4.500   |         | 6.7098     |          | methyltransferase                                              |                         |    |    |   |   |
|          |                        |                      |         |         | 5.000   |         | 7.1360     |          |                                                                |                         |    |    |   |   |
| SGO_0453 |                        | 7.985                |         |         |         | 105.000 |            | 109.2745 | lipoprotein, putative                                          |                         |    |    |   |   |
|          |                        |                      |         |         |         | 144.000 |            | 144.0000 |                                                                |                         |    |    |   |   |
| SGO_0454 | 0.236                  | 7.740                | 0.0327  | 0.1365  | 37.500  | 54.000  | 55.9149    | 56.1983  | conserved hypothetical protein TIGR01033                       |                         |    |    |   |   |
|          |                        |                      |         |         | 41.500  | 42.500  | 59.2285    | 42.5000  |                                                                |                         |    |    |   |   |

- Show detected proteins only
- Show all proteins

Proteins found: 1179

Filter by category:  
ABC Transporter

Test

Cutoff

q-Value

.005

p-Value

|             | Signif | Direction | Applies To   |
|-------------|--------|-----------|--------------|
| Red         | yes    | +         | ratios, bars |
| Yellow      | no     | n/a       | bars         |
| Green       | yes    | -         | ratios, bars |
| Pink        | yes    | +         | p-, q-Values |
| Light Green | yes    | -         | p-, q-Values |

Dot Plots Dot Plots

Summary Table SgFn vs Sg SgPg vs Sg SgPgFn vs Sg SgPg vs SgFn SgPgFn vs SgFn SgPgFn vs SgPg Coverage

| Protein  | SgPg vs Sg             |                      |         |         | Raw     |         | Normalized |          | Description                                          | Log <sub>2</sub> Ratios |    |    |   |   |
|----------|------------------------|----------------------|---------|---------|---------|---------|------------|----------|------------------------------------------------------|-------------------------|----|----|---|---|
|          | Log <sub>2</sub> Ratio | Log <sub>2</sub> Sum | q-Value | p-Value | SgPg    | Sg      | SgPg       | Sg       |                                                      | -6                      | -4 | -2 | 0 | 2 |
| SGO_0455 | -2.675                 | 8.428                | 0.0004  | 0.0005  | 14.500  | 155.500 | 21.6204    | 161.8303 | lipoprotein, putative                                |                         |    |    |   |   |
|          |                        |                      |         |         | 17.500  | 136.000 | 24.9759    | 136.0000 |                                                      |                         |    |    |   |   |
| SGO_0456 |                        | 3.732                |         |         |         | 7.000   |            | 7.2850   | ILL5; amino acid aminohydrolase                      |                         |    |    |   |   |
|          |                        |                      |         |         |         | 6.000   |            | 6.0000   |                                                      |                         |    |    |   |   |
| SGO_0457 | -1.812                 | 9.410                | 0.0002  | 0.0001  | 48.500  | 245.000 | 72.3166    | 254.9739 | ABC transporter, substrate-binding protein SP0148    |                         |    |    |   |   |
|          |                        |                      |         |         | 55.000  | 274.500 | 78.4956    | 274.5000 |                                                      |                         |    |    |   |   |
| SGO_0458 | -1.995                 | 10.913               | 0.0005  | 0.0005  | 128.000 | 801.500 | 190.8562   | 834.1288 | hlpA; lipoprotein                                    |                         |    |    |   |   |
|          |                        |                      |         |         | 136.500 | 708.500 | 194.8119   | 708.5000 |                                                      |                         |    |    |   |   |
| SGO_0459 | -1.190                 | 5.463                | 0.0169  | 0.0627  | 5.500   | 10.000  | 8.2009     | 10.4071  | succinyl-diaminopimelate desuccinylase               |                         |    |    |   |   |
|          |                        |                      |         |         | 3.500   | 20.500  | 4.9952     | 20.5000  |                                                      |                         |    |    |   |   |
| SGO_0460 | -2.214                 | 7.691                | 0.0008  | 0.0013  | 13.000  | 91.000  | 19.3838    | 94.7046  | ABC transporter, ATP-binding protein SP0151          |                         |    |    |   |   |
|          |                        |                      |         |         | 12.000  | 75.500  | 17.1263    | 75.5000  |                                                      |                         |    |    |   |   |
| SGO_0463 |                        | 2.723                |         |         |         | 2.500   |            | 2.6018   | cydD; putative ABC transporter (ATP-binding protein) |                         |    |    |   |   |
|          |                        |                      |         |         |         | 4.000   |            | 4.0000   |                                                      |                         |    |    |   |   |
| SGO_0468 | -0.141                 | 6.233                | 0.1049  | 0.5199  | 11.000  | 12.000  | 16.4017    | 12.4885  | hypothetical protein SGO_0468                        |                         |    |    |   |   |
|          |                        |                      |         |         | 12.500  | 28.500  | 17.8399    | 28.5000  |                                                      |                         |    |    |   |   |
| SGO_0469 |                        | 4.352                |         |         |         | 10.500  |            | 10.9275  | integral membrane protein                            |                         |    |    |   |   |
|          |                        |                      |         |         |         | 9.500   |            | 9.5000   |                                                      |                         |    |    |   |   |
| SGO_0476 | 1.201                  | 6.277                | 0.0008  | 0.0012  | 19.500  | 12.000  | 29.0757    | 12.4885  | rhodanese family protein                             |                         |    |    |   |   |
|          |                        |                      |         |         | 17.500  | 11.000  | 24.9759    | 11.0000  |                                                      |                         |    |    |   |   |
| SGO_0480 | 2.150                  | 5.482                | 0.0231  | 0.0917  | 15.000  |         | 22.3660    |          | hypothetical protein SGO_0480                        |                         |    |    |   |   |
|          |                        |                      |         |         | 12.500  | 4.500   | 17.8399    | 4.5000   |                                                      |                         |    |    |   |   |
| SGO_0483 | 0.911                  | 6.419                | 0.0108  | 0.0362  | 15.000  | 17.000  | 22.3660    | 17.6921  | hypothetical protein SGO_0483                        |                         |    |    |   |   |
|          |                        |                      |         |         | 23.500  | 12.000  | 33.5390    | 12.0000  |                                                      |                         |    |    |   |   |

Show detected proteins only  
 Show all proteins  
 Filter by category:

Proteins found: 1179

**Test**      **Cutoff**  
     

| Signif | Direction | Applies To   |
|--------|-----------|--------------|
| yes    | +         | ratios, bars |
| no     | n/a       | bars         |
| yes    | -         | ratios, bars |
| yes    | +         | p-, q-Values |
| yes    | -         | p-, q-Values |

[Dot Plots](#)

Summary Table

SgFn vs Sg

SgPg vs Sg

SgPgFn vs Sg

SgPg vs SgFn

SgPgFn vs SgFn

SgPgFn vs SgPg

Coverage

| Protein  | SgPg vs Sg             |                      |         |         | Raw     |         | Normalized |          | Description                                            | Log <sub>2</sub> Ratios |    |    |   |   |   |   |
|----------|------------------------|----------------------|---------|---------|---------|---------|------------|----------|--------------------------------------------------------|-------------------------|----|----|---|---|---|---|
|          | Log <sub>2</sub> Ratio | Log <sub>2</sub> Sum | q-Value | p-Value | SgPg    | Sg      | SgPg       | Sg       |                                                        | -6                      | -4 | -2 | 0 | 2 | 4 | 6 |
| SGO_0484 |                        | 4.515                |         |         |         | 9.000   |            | 9.3664   | sensor histidine kinase                                |                         |    |    |   |   |   |   |
|          |                        |                      |         |         |         | 13.500  |            | 13.5000  |                                                        |                         |    |    |   |   |   |   |
| SGO_0488 | -2.054                 | 6.608                | 0.0002  | 0.0001  | 6.000   | 39.500  | 8.9464     | 41.1080  | ABC transporter, ATP-binding protein SP0483            |                         |    |    |   |   |   |   |
|          |                        |                      |         |         | 7.000   | 37.500  | 9.9904     | 37.5000  |                                                        |                         |    |    |   |   |   |   |
| SGO_0491 |                        | 3.343                |         |         | 2.500   |         | 3.7277     |          | gidB; methyltransferase GidB                           |                         |    |    |   |   |   |   |
|          |                        |                      |         |         | 4.500   |         | 6.4224     |          |                                                        |                         |    |    |   |   |   |   |
| SGO_0494 | 1.064                  | 6.136                | 0.0009  | 0.0013  | 16.500  | 9.500   | 24.6026    | 9.8867   | lemA; LemA-like protein                                |                         |    |    |   |   |   |   |
|          |                        |                      |         |         | 16.000  | 13.000  | 22.8351    | 13.0000  |                                                        |                         |    |    |   |   |   |   |
| SGO_0495 | -0.397                 | 4.932                | 0.0987  | 0.4863  | 5.500   | 8.000   | 8.2009     | 8.3257   | htpx; heat shock protein                               |                         |    |    |   |   |   |   |
|          |                        |                      |         |         |         | 14.000  |            | 14.0000  |                                                        |                         |    |    |   |   |   |   |
| SGO_0497 |                        |                      |         |         |         |         |            |          | gtfG; glucosyltransferase G                            |                         |    |    |   |   |   |   |
| SGO_0500 |                        | 2.058                |         |         |         | 4.000   |            | 4.1628   | rggD; putative transcriptional regulator RggD          |                         |    |    |   |   |   |   |
| SGO_0501 | 0.653                  | 6.885                | 0.0004  | 0.0004  | 25.000  | 22.500  | 37.2766    | 23.4160  | Uncharacterized ACR, COG1399                           |                         |    |    |   |   |   |   |
|          |                        |                      |         |         | 24.500  | 22.500  | 34.9662    | 22.5000  |                                                        |                         |    |    |   |   |   |   |
| SGO_0502 | -0.710                 | 9.878                | 0.0016  | 0.0032  | 133.000 | 291.000 | 198.3115   | 302.8465 | floL; flotillin-like protein                           |                         |    |    |   |   |   |   |
|          |                        |                      |         |         | 112.000 | 280.000 | 159.8457   | 280.0000 |                                                        |                         |    |    |   |   |   |   |
| SGO_0503 | 0.873                  | 10.962               | 0.0003  | 0.0002  | 420.000 | 350.000 | 626.2468   | 364.2484 | gnd; 6-phosphogluconate dehydrogenase, decarboxylating |                         |    |    |   |   |   |   |
|          |                        |                      |         |         | 465.000 | 340.000 | 663.6449   | 340.0000 |                                                        |                         |    |    |   |   |   |   |
| SGO_0505 | -3.384                 | 10.986               | 0.0001  | 0.0000  | 53.500  | 911.000 | 79.7719    | 948.0865 | PTS system, IIBC component                             |                         |    |    |   |   |   |   |
|          |                        |                      |         |         | 69.000  | 902.500 | 98.4763    | 902.5000 |                                                        |                         |    |    |   |   |   |   |
| SGO_0506 | -1.165                 | 3.532                |         |         |         |         |            |          | rgfB; RgfB                                             |                         |    |    |   |   |   |   |
|          |                        |                      |         |         | 2.500   | 8.000   | 3.5680     | 8.0000   |                                                        |                         |    |    |   |   |   |   |

- Show detected proteins only
- Show all proteins

Proteins found: 1179

Filter by category:

ABC Transporter

Test

Cutoff

q-Value

.005

p-Value

|             | Signif | Direction | Applies To   |
|-------------|--------|-----------|--------------|
| Red         | yes    | +         | ratios, bars |
| Yellow      | no     | n/a       | bars         |
| Green       | yes    | -         | ratios, bars |
| Pink        | yes    | +         | p-, q-Values |
| Light Green | yes    | -         | p-, q-Values |

Dot Plots Dot Plots

Summary Table

SgFn vs Sg

SgPg vs Sg

SgPgFn vs Sg

SgPg vs SgFn

SgPgFn vs SgFn

SgPgFn vs SgPg

Coverage

| Protein  | SgPg vs Sg             |                      |         |         | Raw    |         | Normalized |          | Description                                                               | Log <sub>2</sub> Ratios |    |    |   |   |
|----------|------------------------|----------------------|---------|---------|--------|---------|------------|----------|---------------------------------------------------------------------------|-------------------------|----|----|---|---|
|          | Log <sub>2</sub> Ratio | Log <sub>2</sub> Sum | q-Value | p-Value | SgPg   | Sg      | SgPg       | Sg       |                                                                           | -6                      | -4 | -2 | 0 | 2 |
| SGO_0508 | -0.519                 | 6.409                | 0.0010  | 0.0016  | 11.000 | 24.500  | 16.4017    | 25.4974  | nrdR; transcriptional regulator, NrdR family                              |                         |    |    |   |   |
|          |                        |                      |         |         | 13.000 | 24.500  | 18.5535    | 24.5000  |                                                                           |                         |    |    |   |   |
| SGO_0509 | -1.245                 | 4.446                | 0.0735  | 0.3492  |        | 5.500   |            | 5.7239   | Replication initiation and membrane attachment protein (DnaB) superfamily |                         |    |    |   |   |
|          |                        |                      |         |         | 2.500  | 12.500  | 3.5680     | 12.5000  |                                                                           |                         |    |    |   |   |
| SGO_0510 | 1.688                  | 6.091                | 0.0010  | 0.0015  | 19.000 | 6.500   | 28.3302    | 6.7646   | dnaI; primosomal protein DnaI                                             |                         |    |    |   |   |
|          |                        |                      |         |         | 16.500 | 9.500   | 23.5487    | 9.5000   |                                                                           |                         |    |    |   |   |
| SGO_0511 | 0.194                  | 5.117                | 0.1773  | 0.9470  | 6.000  | 4.500   | 8.9464     | 4.6832   | NADPH-flavin oxidoreductase -like protein                                 |                         |    |    |   |   |
|          |                        |                      |         |         | 6.000  | 12.500  | 8.5632     | 12.5000  |                                                                           |                         |    |    |   |   |
| SGO_0512 | 0.530                  | 8.008                | 0.0100  | 0.0333  | 50.000 | 61.000  | 74.5532    | 63.4833  | GTP-binding protein engA                                                  |                         |    |    |   |   |
|          |                        |                      |         |         | 53.500 | 43.000  | 76.3548    | 43.0000  |                                                                           |                         |    |    |   |   |
| SGO_0513 |                        | 2.170                |         |         |        |         |            |          | Snf2 family protein                                                       |                         |    |    |   |   |
|          |                        |                      |         |         |        | 4.500   |            | 4.5000   |                                                                           |                         |    |    |   |   |
| SGO_0514 |                        | 3.791                |         |         | 4.500  |         | 6.7098     |          | hypothetical protein SGO_0514                                             |                         |    |    |   |   |
|          |                        |                      |         |         | 5.000  |         | 7.1360     |          |                                                                           |                         |    |    |   |   |
| SGO_0515 | 0.105                  | 8.471                | 0.0142  | 0.0507  | 61.500 | 85.500  | 91.7004    | 88.9807  | murC; UDP-N-acetylmuramate--alanine ligase                                |                         |    |    |   |   |
|          |                        |                      |         |         | 64.500 | 82.000  | 92.0540    | 82.0000  |                                                                           |                         |    |    |   |   |
| SGO_0518 | -1.438                 | 8.879                | 0.0001  | 0.0001  | 44.000 | 170.000 | 65.6068    | 176.9206 | aminodeoxychorismate lyase-like protein                                   |                         |    |    |   |   |
|          |                        |                      |         |         | 43.000 | 167.000 | 61.3693    | 167.0000 |                                                                           |                         |    |    |   |   |
| SGO_0519 | 0.526                  | 7.415                | 0.0087  | 0.0280  | 38.000 | 31.000  | 56.6604    | 32.2620  | greA; transcription elongation factor greA                                |                         |    |    |   |   |
|          |                        |                      |         |         | 31.000 | 37.500  | 44.2430    | 37.5000  |                                                                           |                         |    |    |   |   |
| SGO_0521 | -1.082                 | 6.092                | 0.0080  | 0.0248  | 9.000  | 18.000  | 13.4196    | 18.7328  | Membrane protein oxaA 2 precursor                                         |                         |    |    |   |   |
|          |                        |                      |         |         | 6.000  | 27.500  | 8.5632     | 27.5000  |                                                                           |                         |    |    |   |   |
| SGO_0523 | 0.164                  | 5.107                | 0.1254  | 0.6344  | 6.500  |         | 9.6919     |          | spoU rRNA Methylase family protein                                        |                         |    |    |   |   |
|          |                        |                      |         |         | 10.000 | 10.500  | 14.2719    | 10.5000  |                                                                           |                         |    |    |   |   |

- Show detected proteins only
- Show all proteins

Proteins found: 1179

Filter by category:

ABC Transporter

Test

Cutoff

q-Value

.005

p-Value

| Signif | Direction | Applies To   |
|--------|-----------|--------------|
| yes    | +         | ratios, bars |
| no     | n/a       | bars         |
| yes    | -         | ratios, bars |
| yes    | +         | p-, q-Values |
| yes    | -         | p-, q-Values |

Dot Plots Dot Plots



Summary Table

SgFn vs Sg

SgPg vs Sg

SgPgFn vs Sg

SgPg vs SgFn

SgPgFn vs SgFn

SgPgFn vs SgPg

Coverage

| Protein  | SgPg vs Sg             |                      |         |         | Raw    |        | Normalized |         | Description                                                   | Log <sub>2</sub> Ratios |    |    |   |   |
|----------|------------------------|----------------------|---------|---------|--------|--------|------------|---------|---------------------------------------------------------------|-------------------------|----|----|---|---|
|          | Log <sub>2</sub> Ratio | Log <sub>2</sub> Sum | q-Value | p-Value | SgPg   | Sg     | SgPg       | Sg      |                                                               | -6                      | -4 | -2 | 0 | 2 |
| SGO_0526 | 0.991                  | 6.225                | 0.0078  | 0.0239  | 18.000 | 8.500  | 26.8391    | 8.8460  | ilvB; acetolactate synthase, large subunit, biosynthetic type |                         |    |    |   |   |
|          |                        |                      |         |         | 15.500 | 17.000 | 22.1215    | 17.0000 |                                                               |                         |    |    |   |   |
| SGO_0527 | -0.395                 | 5.587                | 0.0288  | 0.1179  | 5.500  | 12.500 | 8.2009     | 13.0089 | ilvN; acetolactate synthase, small subunit                    |                         |    |    |   |   |
|          |                        |                      |         |         | 9.000  | 14.000 | 12.8447    | 14.0000 |                                                               |                         |    |    |   |   |
| SGO_0528 | 0.581                  | 8.528                | 0.0018  | 0.0039  | 79.000 | 68.000 | 117.7940   | 70.7683 | ilvC; ketol-acid reductoisomerase                             |                         |    |    |   |   |
|          |                        |                      |         |         | 72.500 | 77.000 | 103.4715   | 77.0000 |                                                               |                         |    |    |   |   |
| SGO_0529 | 1.401                  | 4.686                | 0.0093  | 0.0302  | 5.000  | 2.000  | 7.4553     | 2.0814  | ilvA; threonine dehydratase                                   |                         |    |    |   |   |
|          |                        |                      |         |         | 7.500  | 5.500  | 10.7040    | 5.5000  |                                                               |                         |    |    |   |   |
| SGO_0530 | -1.277                 | 5.023                | 0.0059  | 0.0174  | 2.000  | 10.000 | 2.9821     | 10.4071 | Cof family protein                                            |                         |    |    |   |   |
|          |                        |                      |         |         | 5.000  | 12.000 | 7.1360     | 12.0000 |                                                               |                         |    |    |   |   |
| SGO_0533 | 0.871                  | 2.143                |         |         |        | 1.500  |            | 1.5611  | conserved hypothetical protein TIGR00150                      |                         |    |    |   |   |
|          |                        |                      |         |         | 2.000  |        | 2.8544     |         |                                                               |                         |    |    |   |   |
| SGO_0535 | -2.237                 | 6.905                | 0.0008  | 0.0011  | 6.000  | 42.500 | 8.9464     | 44.2302 | putative transcriptional regulator LytR                       |                         |    |    |   |   |
|          |                        |                      |         |         | 8.500  | 54.500 | 12.1311    | 54.5000 |                                                               |                         |    |    |   |   |
| SGO_0536 | -0.177                 | 6.995                | 0.0193  | 0.0745  | 21.000 | 30.500 | 31.3123    | 31.7416 | hypothetical protein SGO_0536                                 |                         |    |    |   |   |
|          |                        |                      |         |         | 20.000 | 36.000 | 28.5439    | 36.0000 |                                                               |                         |    |    |   |   |
| SGO_0537 | 1.124                  | 6.487                | 0.0008  | 0.0011  | 20.500 | 11.500 | 30.5668    | 11.9682 | HIT family protein                                            |                         |    |    |   |   |
|          |                        |                      |         |         | 21.500 | 16.500 | 30.6847    | 16.5000 |                                                               |                         |    |    |   |   |
| SGO_0538 | -2.541                 | 6.463                | 0.0012  | 0.0020  | 3.500  | 41.000 | 5.2187     | 42.6691 | ABC transporter, ATP-binding protein SP0522                   |                         |    |    |   |   |
|          |                        |                      |         |         | 5.500  | 32.500 | 7.8496     | 32.5000 |                                                               |                         |    |    |   |   |
| SGO_0539 |                        | 4.667                |         |         |        | 10.000 |            | 10.4071 | ABC transporter, permease protein                             |                         |    |    |   |   |
|          |                        |                      |         |         |        | 15.000 |            | 15.0000 |                                                               |                         |    |    |   |   |
| SGO_0540 | 0.148                  | 7.214                | 0.0131  | 0.0456  | 25.500 | 35.500 | 38.0221    | 36.9452 | hypothetical protein SGO_0540                                 |                         |    |    |   |   |
|          |                        |                      |         |         | 28.000 | 33.500 | 39.9614    | 33.5000 |                                                               |                         |    |    |   |   |

- Show detected proteins only
- Show all proteins

Proteins found: 1179

Filter by category:

ABC Transporter

Test

Cutoff

q-Value

.005

p-Value

|             | Signif | Direction | Applies To   |
|-------------|--------|-----------|--------------|
| Red         | yes    | +         | ratios, bars |
| Yellow      | no     | n/a       | bars         |
| Green       | yes    | -         | ratios, bars |
| Pink        | yes    | +         | p-, q-Values |
| Light Green | yes    | -         | p-, q-Values |

Dot Plots Dot Plots

Summary Table SgFn vs Sg SgPg vs Sg SgPgFn vs Sg SgPg vs SgFn SgPgFn vs SgFn SgPgFn vs SgPg Coverage

| Protein  | SgPg vs Sg             |                      |         |         | Raw    |         | Normalized |          | Description                                       | Log <sub>2</sub> Ratios |    |    |   |   |   |   |
|----------|------------------------|----------------------|---------|---------|--------|---------|------------|----------|---------------------------------------------------|-------------------------|----|----|---|---|---|---|
|          | Log <sub>2</sub> Ratio | Log <sub>2</sub> Sum | q-Value | p-Value | SgPg   | Sg      | SgPg       | Sg       |                                                   | -6                      | -4 | -2 | 0 | 2 | 4 | 6 |
| SGO_0541 | -1.602                 | 5.480                | 0.0030  | 0.0073  | 2.500  | 14.000  | 3.7277     | 14.5699  | methyltransferase, putative                       |                         |    |    |   |   |   |   |
|          |                        |                      |         |         | 5.500  | 18.500  | 7.8496     | 18.5000  |                                                   |                         |    |    |   |   |   |   |
| SGO_0542 | -0.865                 | 3.332                |         |         |        |         |            |          | hypothetical protein SGO_0542                     |                         |    |    |   |   |   |   |
|          |                        |                      |         |         | 2.500  | 6.500   | 3.5680     | 6.5000   |                                                   |                         |    |    |   |   |   |   |
| SGO_0543 | -0.585                 | 8.276                | 0.0002  | 0.0001  | 42.000 | 87.500  | 62.6247    | 91.0621  | nusA; transcription termination factor NusA       |                         |    |    |   |   |   |   |
|          |                        |                      |         |         | 43.000 | 95.000  | 61.3693    | 95.0000  |                                                   |                         |    |    |   |   |   |   |
| SGO_0544 |                        | 2.000                |         |         |        |         |            |          | Protein of unknown function (DUF448) superfamily  |                         |    |    |   |   |   |   |
|          |                        |                      |         |         |        | 4.000   |            | 4.0000   |                                                   |                         |    |    |   |   |   |   |
| SGO_0545 |                        | 1.807                |         |         |        |         |            |          | ribosomal protein L7A family                      |                         |    |    |   |   |   |   |
|          |                        |                      |         |         |        | 3.500   |            | 3.5000   |                                                   |                         |    |    |   |   |   |   |
| SGO_0546 | -0.138                 | 8.842                | 0.0729  | 0.3461  | 77.500 | 132.500 | 115.5574   | 137.8940 | infB; Translation initiation factor IF-2          |                         |    |    |   |   |   |   |
|          |                        |                      |         |         | 71.500 | 103.500 | 102.0443   | 103.5000 |                                                   |                         |    |    |   |   |   |   |
| SGO_0547 |                        | 1.098                |         |         |        |         |            |          | rbfA; ribosome-binding factor A                   |                         |    |    |   |   |   |   |
|          |                        |                      |         |         | 1.500  |         | 2.1408     |          |                                                   |                         |    |    |   |   |   |   |
| SGO_0548 | -2.975                 | 7.822                | 0.0004  | 0.0004  | 8.000  | 105.000 | 11.9285    | 109.2745 | Na/Pi-cotransporter family protein                |                         |    |    |   |   |   |   |
|          |                        |                      |         |         | 9.500  | 91.500  | 13.5583    | 91.5000  |                                                   |                         |    |    |   |   |   |   |
| SGO_0549 | 3.756                  | 5.724                |         |         | 33.000 | 3.500   | 49.2051    | 3.6425   | nagA; N-acetylglucosamine-6-phosphate deacetylase |                         |    |    |   |   |   |   |
|          |                        |                      |         |         |        |         |            |          |                                                   |                         |    |    |   |   |   |   |
| SGO_0552 | 2.595                  | 6.355                | 0.0004  | 0.0004  | 22.500 | 3.500   | 33.5489    | 3.6425   | oxidoreductase, aldo/keto reductase family        |                         |    |    |   |   |   |   |
|          |                        |                      |         |         | 25.000 | 9.000   | 35.6798    | 9.0000   |                                                   |                         |    |    |   |   |   |   |
| SGO_0554 | -0.957                 | 6.566                | 0.0297  | 0.1216  | 8.500  | 18.000  | 12.6740    | 18.7328  | hsdR; type I site-specific deoxyribonuclease      |                         |    |    |   |   |   |   |
|          |                        |                      |         |         | 12.500 | 45.500  | 17.8399    | 45.5000  |                                                   |                         |    |    |   |   |   |   |
| SGO_0556 |                        | 3.279                |         |         |        | 5.000   |            | 5.2035   | DNA helicase-like protein, putative               |                         |    |    |   |   |   |   |
|          |                        |                      |         |         |        | 4.500   |            | 4.5000   |                                                   |                         |    |    |   |   |   |   |

Show detected proteins only  
 Show all proteins

Filter by category:

Proteins found:  
1179

**Test** **Cutoff**

| Signif | Direction | Applies To   |
|--------|-----------|--------------|
| yes    | +         | ratios, bars |
| no     | n/a       | bars         |
| yes    | -         | ratios, bars |
| yes    | +         | p-, q-Values |
| yes    | -         | p-, q-Values |

Dot Plots  Dot Plots

Summary Table

SgFn vs Sg

SgPg vs Sg

SgPgFn vs Sg

SgPg vs SgFn

SgPgFn vs SgFn

SgPgFn vs SgPg

Coverage

SgPg vs Sg

Raw

Normalized

Log<sub>2</sub> Ratios

| Protein  | SgPg vs Sg             |                      |         |         | Raw    |        | Normalized |          | Description                                                        | Log <sub>2</sub> Ratios |    |    |   |   |   |   |
|----------|------------------------|----------------------|---------|---------|--------|--------|------------|----------|--------------------------------------------------------------------|-------------------------|----|----|---|---|---|---|
|          | Log <sub>2</sub> Ratio | Log <sub>2</sub> Sum | q-Value | p-Value | SgPg   | Sg     | SgPg       | Sg       |                                                                    | -6                      | -4 | -2 | 0 | 2 | 4 | 6 |
| SGO_0557 |                        | 1.807                |         |         |        |        |            |          | HsdS specificity protein of type I restriction-modification system |                         |    |    |   |   |   |   |
|          |                        |                      |         |         |        | 3.500  |            | 3.5000   |                                                                    |                         |    |    |   |   |   |   |
| SGO_0558 | 0.356                  | 4.186                | 0.1015  | 0.5010  | 5.500  |        | 8.2009     |          | hypothetical protein SGO_0558                                      |                         |    |    |   |   |   |   |
|          |                        |                      |         |         |        | 3.500  | 5.000      | 4.9952   | 5.0000                                                             |                         |    |    |   |   |   |   |
| SGO_0560 | 0.516                  | 5.703                | 0.0024  | 0.0054  | 11.000 | 10.000 | 16.4017    | 10.4071  | hsdM; type I restriction-modification system, M subunit            |                         |    |    |   |   |   |   |
|          |                        |                      |         |         |        | 10.000 | 11.000     | 14.2719  | 11.0000                                                            |                         |    |    |   |   |   |   |
| SGO_0565 | 0.214                  | 8.069                | 0.0140  | 0.0500  | 45.500 | 56.500 | 67.8434    | 58.8001  | adhA; alcohol dehydrogenase                                        |                         |    |    |   |   |   |   |
|          |                        |                      |         |         |        | 53.500 | 65.500     | 76.3548  | 65.5000                                                            |                         |    |    |   |   |   |   |
| SGO_0566 |                        | 7.073                |         |         |        |        |            |          | sgc; serine protease challisin                                     |                         |    |    |   |   |   |   |
|          |                        |                      |         |         |        |        | 53.000     |          | 55.1576                                                            |                         |    |    |   |   |   |   |
|          |                        |                      |         |         |        |        | 79.500     |          | 79.5000                                                            |                         |    |    |   |   |   |   |
| SGO_0568 | 0.047                  | 7.232                | 0.0949  | 0.4663  | 24.000 | 34.500 | 35.7855    | 35.9045  | glyQ; glycyl-tRNA synthetase, alpha subunit                        |                         |    |    |   |   |   |   |
|          |                        |                      |         |         |        | 28.500 | 38.000     | 40.6750  | 38.0000                                                            |                         |    |    |   |   |   |   |
| SGO_0569 | 0.474                  | 8.445                | 0.0001  | 0.0001  | 67.000 | 70.000 | 99.9013    | 72.8497  | glyS; glycyl-tRNA synthetase, beta subunit                         |                         |    |    |   |   |   |   |
|          |                        |                      |         |         |        | 72.000 | 73.000     | 102.7579 | 73.0000                                                            |                         |    |    |   |   |   |   |
| SGO_0570 | -0.455                 | 4.468                | 0.0111  | 0.0375  | 4.500  |        | 6.7098     |          | hypothetical protein SGO_0570                                      |                         |    |    |   |   |   |   |
|          |                        |                      |         |         |        | 4.500  | 9.000      | 6.4224   | 9.0000                                                             |                         |    |    |   |   |   |   |
| SGO_0571 |                        | 1.322                |         |         |        |        |            |          | hypothetical protein SGO_0571                                      |                         |    |    |   |   |   |   |
|          |                        |                      |         |         |        |        | 2.500      |          | 2.5000                                                             |                         |    |    |   |   |   |   |
| SGO_0573 | -0.163                 | 6.619                | 0.0727  | 0.3439  | 16.000 | 20.500 | 23.8570    | 21.3345  | mraW; S-adenosyl-methyltransferase MraW                            |                         |    |    |   |   |   |   |
|          |                        |                      |         |         |        | 15.500 | 31.000     | 22.1215  | 31.0000                                                            |                         |    |    |   |   |   |   |
| SGO_0575 | -3.188                 | 7.054                | 0.0001  | 0.0001  | 4.500  | 55.000 | 6.7098     | 57.2390  | pbp2X; penicillin-binding protein 2X                               |                         |    |    |   |   |   |   |
|          |                        |                      |         |         |        | 4.500  | 62.500     | 6.4224   | 62.5000                                                            |                         |    |    |   |   |   |   |
| SGO_0576 |                        | 3.087                |         |         |        |        |            |          | mraY; phospho-N-acetylmuramoyl-pentapeptide-transferase            |                         |    |    |   |   |   |   |
|          |                        |                      |         |         |        |        | 8.500      |          | 8.5000                                                             |                         |    |    |   |   |   |   |

 Show detected proteins only Show all proteinsProteins found:  
1179 Filter by category:

ABC Transporter

Test

Cutoff

q-Value

.005

p-Value

|             | Signif | Direction | Applies To   |
|-------------|--------|-----------|--------------|
| Red         | yes    | +         | ratios, bars |
| Yellow      | no     | n/a       | bars         |
| Green       | yes    | -         | ratios, bars |
| Pink        | yes    | +         | p-, q-Values |
| Light Green | yes    | -         | p-, q-Values |

Dot Plots Dot Plots

Summary Table

SgFn vs Sg

SgPg vs Sg

SgPgFn vs Sg

SgPg vs SgFn

SgPgFn vs SgFn

SgPgFn vs SgPg

Coverage

| Protein  | SgPg vs Sg             |                      |         |         | Raw    |         | Normalized |          | Description                                    | Log <sub>2</sub> Ratios |    |    |   |   |   |   |
|----------|------------------------|----------------------|---------|---------|--------|---------|------------|----------|------------------------------------------------|-------------------------|----|----|---|---|---|---|
|          | Log <sub>2</sub> Ratio | Log <sub>2</sub> Sum | q-Value | p-Value | SgPg   | Sg      | SgPg       | Sg       |                                                | -6                      | -4 | -2 | 0 | 2 | 4 | 6 |
| SGO_0577 | 0.720                  | 7.329                | 0.0064  | 0.0189  | 35.500 | 23.500  | 52.9328    | 24.4567  | ATP-dependent RNA helicase                     |                         |    |    |   |   |   |   |
|          |                        |                      |         |         | 32.500 | 37.000  | 46.3838    | 37.0000  |                                                |                         |    |    |   |   |   |   |
| SGO_0578 |                        | 6.489                |         |         |        | 44.500  |            | 46.3116  | amino acid ABC transporter permease protein    |                         |    |    |   |   |   |   |
|          |                        |                      |         |         |        | 43.500  |            | 43.5000  |                                                |                         |    |    |   |   |   |   |
| SGO_0579 | -2.330                 | 7.076                | 0.0002  | 0.0001  | 9.000  | 55.500  | 13.4196    | 57.7594  | amino acid ABC transporter ATP binding protein |                         |    |    |   |   |   |   |
|          |                        |                      |         |         | 6.500  | 54.500  | 9.2768     | 54.5000  |                                                |                         |    |    |   |   |   |   |
| SGO_0581 | 0.719                  | 6.131                | 0.0084  | 0.0264  | 12.500 | 11.000  | 18.6383    | 11.4478  | trxB; thioredoxin-disulfide reductase          |                         |    |    |   |   |   |   |
|          |                        |                      |         |         | 17.500 | 15.000  | 24.9759    | 15.0000  |                                                |                         |    |    |   |   |   |   |
| SGO_0582 | 1.890                  | 7.748                | 0.0025  | 0.0058  | 47.000 | 18.000  | 70.0800    | 18.7328  | nicotinate phosphoribosyltransferase, putative |                         |    |    |   |   |   |   |
|          |                        |                      |         |         | 69.500 | 27.000  | 99.1899    | 27.0000  |                                                |                         |    |    |   |   |   |   |
| SGO_0583 | 1.345                  | 5.936                | 0.0033  | 0.0083  | 14.000 | 5.500   | 20.8749    | 5.7239   | nadE; NAD+ synthetase                          |                         |    |    |   |   |   |   |
|          |                        |                      |         |         | 15.500 | 12.500  | 22.1215    | 12.5000  |                                                |                         |    |    |   |   |   |   |
| SGO_0585 | 0.921                  | 7.164                | 0.0065  | 0.0193  | 36.000 | 19.500  | 53.6783    | 20.2938  | pepC; aminopeptidase C                         |                         |    |    |   |   |   |   |
|          |                        |                      |         |         | 28.000 | 29.500  | 39.9614    | 29.5000  |                                                |                         |    |    |   |   |   |   |
| SGO_0586 | -1.402                 | 8.842                | 0.0003  | 0.0003  | 47.000 | 154.500 | 70.0800    | 160.7896 | pbp1a; penicillin-binding protein 1A           |                         |    |    |   |   |   |   |
|          |                        |                      |         |         | 39.500 | 171.500 | 56.3741    | 171.5000 |                                                |                         |    |    |   |   |   |   |
| SGO_0589 | 1.105                  | 7.429                | 0.0068  | 0.0204  | 31.500 | 24.000  | 46.9685    | 24.9770  | methylase                                      |                         |    |    |   |   |   |   |
|          |                        |                      |         |         | 50.000 | 29.000  | 71.3597    | 29.0000  |                                                |                         |    |    |   |   |   |   |
| SGO_0590 | -0.529                 | 5.876                | 0.0308  | 0.1271  | 10.000 | 13.500  | 14.9106    | 14.0496  | Methyltransferase                              |                         |    |    |   |   |   |   |
|          |                        |                      |         |         | 6.500  | 20.500  | 9.2768     | 20.5000  |                                                |                         |    |    |   |   |   |   |
| SGO_0591 | -2.495                 | 8.975                | 0.0000  | 0.0000  | 25.500 | 208.000 | 38.0221    | 216.4676 | hypothetical protein SGO_0591                  |                         |    |    |   |   |   |   |
|          |                        |                      |         |         | 26.500 | 211.000 | 37.8206    | 211.0000 |                                                |                         |    |    |   |   |   |   |
| SGO_0592 | 1.171                  | 5.856                | 0.0003  | 0.0002  | 13.000 | 8.000   | 19.3838    | 8.3257   | luxS; autoinducer-2 production protein LuxS    |                         |    |    |   |   |   |   |
|          |                        |                      |         |         | 14.500 | 9.500   | 20.6943    | 9.5000   |                                                |                         |    |    |   |   |   |   |

- Show detected proteins only
- Show all proteins

Proteins found: 1179

Filter by category:  
ABC Transporter

Test

Cutoff

q-Value

.005

p-Value

|             | Signif | Direction | Applies To   |
|-------------|--------|-----------|--------------|
| Red         | yes    | +         | ratios, bars |
| Yellow      | no     | n/a       | bars         |
| Green       | yes    | -         | ratios, bars |
| Pink        | yes    | +         | p-, q-Values |
| Light Green | yes    | -         | p-, q-Values |

Dot Plots Dot Plots

Summary Table

SgFn vs Sg

SgPg vs Sg

SgPgFn vs Sg

SgPg vs SgFn

SgPgFn vs SgFn

SgPgFn vs SgPg

Coverage

| Protein  | SgPg vs Sg             |                      |         |         | Raw     |         | Normalized |          | Description                                                                                   | Log <sub>2</sub> Ratios |    |    |   |   |
|----------|------------------------|----------------------|---------|---------|---------|---------|------------|----------|-----------------------------------------------------------------------------------------------|-------------------------|----|----|---|---|
|          | Log <sub>2</sub> Ratio | Log <sub>2</sub> Sum | q-Value | p-Value | SgPg    | Sg      | SgPg       | Sg       |                                                                                               | -6                      | -4 | -2 | 0 | 2 |
| SGO_0593 | -2.047                 | 9.043                | 0.0002  | 0.0001  | 37.500  | 196.000 | 55.9149    | 203.9791 | HD/KH domain protein                                                                          |                         |    |    |   |   |
|          |                        |                      |         |         | 33.000  | 220.500 | 47.0974    | 220.5000 |                                                                                               |                         |    |    |   |   |
| SGO_0594 | -0.071                 | 6.280                | 0.1194  | 0.6001  | 11.500  | 21.500  | 17.1472    | 22.3753  | gmk; Guanylate kinase (GMP kinase)                                                            |                         |    |    |   |   |
|          |                        |                      |         |         | 14.500  | 17.500  | 20.6943    | 17.5000  |                                                                                               |                         |    |    |   |   |
| SGO_0595 | -0.368                 | 7.248                | 0.0003  | 0.0002  | 22.000  | 40.500  | 32.8034    | 42.1487  | DNA-directed RNA polymerase, omega subunit                                                    |                         |    |    |   |   |
|          |                        |                      |         |         | 23.500  | 43.500  | 33.5390    | 43.5000  |                                                                                               |                         |    |    |   |   |
| SGO_0596 |                        | 1.643                |         |         |         | 3.000   |            | 3.1221   | priA; primosomal protein N''                                                                  |                         |    |    |   |   |
|          |                        |                      |         |         |         |         |            |          |                                                                                               |                         |    |    |   |   |
| SGO_0597 | 1.413                  | 5.785                | 0.0025  | 0.0057  | 14.000  | 5.000   | 20.8749    | 5.2035   | fmt; methionyl-tRNA formyltransferase                                                         |                         |    |    |   |   |
|          |                        |                      |         |         | 13.000  | 10.500  | 18.5535    | 10.5000  |                                                                                               |                         |    |    |   |   |
| SGO_0598 | 0.767                  | 5.065                | 0.0098  | 0.0324  | 8.500   | 6.000   | 12.6740    | 6.2443   | sun; sun protein                                                                              |                         |    |    |   |   |
|          |                        |                      |         |         | 6.000   | 6.000   | 8.5632     | 6.0000   |                                                                                               |                         |    |    |   |   |
| SGO_0599 | -0.624                 | 7.019                | 0.0012  | 0.0022  | 18.500  | 39.000  | 27.5847    | 40.5877  | phosphoprotein phosphatase                                                                    |                         |    |    |   |   |
|          |                        |                      |         |         | 16.500  | 38.000  | 23.5487    | 38.0000  |                                                                                               |                         |    |    |   |   |
| SGO_0600 | -2.409                 | 8.059                | 0.0001  | 0.0000  | 15.500  | 105.000 | 23.1115    | 109.2745 | serine/threonine protein kinase                                                               |                         |    |    |   |   |
|          |                        |                      |         |         | 13.500  | 115.000 | 19.2671    | 115.0000 |                                                                                               |                         |    |    |   |   |
| SGO_0602 |                        | 4.115                |         |         |         | 8.000   |            | 8.3257   | histidine kinase                                                                              |                         |    |    |   |   |
|          |                        |                      |         |         |         | 9.000   |            | 9.0000   |                                                                                               |                         |    |    |   |   |
| SGO_0603 | -0.916                 | 5.074                | 0.0148  | 0.0537  | 2.500   | 9.500   | 3.7277     | 9.8867   | response regulator                                                                            |                         |    |    |   |   |
|          |                        |                      |         |         | 6.000   | 11.500  | 8.5632     | 11.5000  |                                                                                               |                         |    |    |   |   |
| SGO_0604 | 0.579                  | 8.119                | 0.0028  | 0.0068  | 54.000  | 47.500  | 80.5174    | 49.4337  | hydrolase, haloacid dehalogenase family/peptidyl-prolyl cis-trans isomerase, cyclophilin type |                         |    |    |   |   |
|          |                        |                      |         |         | 60.000  | 62.500  | 85.6316    | 62.5000  |                                                                                               |                         |    |    |   |   |
| SGO_0606 | -0.319                 | 9.299                | 0.0034  | 0.0086  | 89.000  | 162.000 | 132.7047   | 168.5950 | cysK; cysteine synthase A                                                                     |                         |    |    |   |   |
|          |                        |                      |         |         | 103.500 | 181.000 | 147.7145   | 181.0000 |                                                                                               |                         |    |    |   |   |

- Show detected proteins only
- Show all proteins

Proteins found: 1179

Filter by category:

ABC Transporter

Test

Cutoff

q-Value

.005

p-Value

| Signif | Direction | Applies To   |
|--------|-----------|--------------|
| yes    | +         | ratios, bars |
| no     | n/a       | bars         |
| yes    | -         | ratios, bars |
| yes    | +         | p-, q-Values |
| yes    | -         | p-, q-Values |

Dot Plots Dot Plots

Summary Table

SgFn vs Sg

SgPg vs Sg

SgPgFn vs Sg

SgPg vs SgFn

SgPgFn vs SgFn

SgPgFn vs SgPg

Coverage

| Protein  | SgPg vs Sg             |                      |         |         | Raw    |        | Normalized |         | Description                                                                     | Log <sub>2</sub> Ratios |    |    |   |   |   |   |
|----------|------------------------|----------------------|---------|---------|--------|--------|------------|---------|---------------------------------------------------------------------------------|-------------------------|----|----|---|---|---|---|
|          | Log <sub>2</sub> Ratio | Log <sub>2</sub> Sum | q-Value | p-Value | SgPg   | Sg     | SgPg       | Sg      |                                                                                 | -6                      | -4 | -2 | 0 | 2 | 4 | 6 |
| SGO_0608 |                        | 4.069                |         |         |        | 7.000  |            | 7.2850  | comFA; competence ComFA-like protein                                            |                         |    |    |   |   |   |   |
|          |                        |                      |         |         |        | 9.500  |            | 9.5000  |                                                                                 |                         |    |    |   |   |   |   |
| SGO_0610 | 0.727                  | 8.578                | 0.0016  | 0.0031  | 84.500 | 75.000 | 125.9949   | 78.0532 | ribosomal subunit interface protein                                             |                         |    |    |   |   |   |   |
|          |                        |                      |         |         | 78.500 | 66.000 | 112.0347   | 66.0000 |                                                                                 |                         |    |    |   |   |   |   |
| SGO_0626 | -1.293                 | 5.901                | 0.0004  | 0.0005  | 5.000  | 20.000 | 7.4553     | 20.8142 | recX; Regulatory protein recX                                                   |                         |    |    |   |   |   |   |
|          |                        |                      |         |         | 7.000  | 21.500 | 9.9904     | 21.5000 |                                                                                 |                         |    |    |   |   |   |   |
| SGO_0628 |                        | 1.322                |         |         |        |        |            |         | ymdC; 3''-aminoglycoside phosphotransferase-like protein (kanamycin kinase)     |                         |    |    |   |   |   |   |
|          |                        |                      |         |         |        | 2.500  |            | 2.5000  |                                                                                 |                         |    |    |   |   |   |   |
| SGO_0629 | -0.706                 | 3.714                | 0.0791  | 0.3819  | 2.000  | 3.500  | 2.9821     | 3.6425  | rumA-1; 23S rRNA (uracil-5-)-methyltransferase RumA                             |                         |    |    |   |   |   |   |
|          |                        |                      |         |         |        | 6.500  |            | 6.5000  |                                                                                 |                         |    |    |   |   |   |   |
| SGO_0631 | 3.710                  | 6.407                | 0.0052  | 0.0151  | 28.000 | 3.000  | 41.7498    | 3.1221  | alpha-glycerophosphate oxidase                                                  |                         |    |    |   |   |   |   |
|          |                        |                      |         |         | 28.000 |        | 39.9614    |         |                                                                                 |                         |    |    |   |   |   |   |
| SGO_0632 |                        | 5.243                |         |         | 12.000 |        | 17.8928    |         | glpK; glycerol kinase                                                           |                         |    |    |   |   |   |   |
|          |                        |                      |         |         | 14.000 |        | 19.9807    |         |                                                                                 |                         |    |    |   |   |   |   |
| SGO_0635 |                        | 2.000                |         |         |        |        |            |         | hypothetical protein SGO_0635                                                   |                         |    |    |   |   |   |   |
|          |                        |                      |         |         |        | 4.000  |            | 4.0000  |                                                                                 |                         |    |    |   |   |   |   |
| SGO_0636 |                        | 2.930                |         |         |        | 3.000  |            | 3.1221  | hypothetical protein SGO_0636                                                   |                         |    |    |   |   |   |   |
|          |                        |                      |         |         |        | 4.500  |            | 4.5000  |                                                                                 |                         |    |    |   |   |   |   |
| SGO_0639 | 0.402                  | 8.251                | 0.0020  | 0.0044  | 55.500 | 65.500 | 82.7540    | 68.1665 | valS; valyl-tRNA synthetase                                                     |                         |    |    |   |   |   |   |
|          |                        |                      |         |         | 63.500 | 63.000 | 90.6268    | 63.0000 |                                                                                 |                         |    |    |   |   |   |   |
| SGO_0640 | -0.116                 | 4.207                | 0.1194  | 0.5995  | 2.500  | 6.000  | 3.7277     | 6.2443  | modification methylase                                                          |                         |    |    |   |   |   |   |
|          |                        |                      |         |         | 3.500  | 3.500  | 4.9952     | 3.5000  |                                                                                 |                         |    |    |   |   |   |   |
| SGO_0641 | 0.103                  | 6.975                | 0.0807  | 0.3916  | 22.500 | 32.500 | 33.5489    | 33.8231 | ATPase, histidine kinase-, DNA gyrase B-, and HSP90-like domain protein protein |                         |    |    |   |   |   |   |
|          |                        |                      |         |         | 22.000 | 27.000 | 31.3983    | 27.0000 |                                                                                 |                         |    |    |   |   |   |   |

- Show detected proteins only
- Show all proteins

Proteins found: 1179

Filter by category:

ABC Transporter

Test

Cutoff

q-Value

.005

p-Value

|             | Signif | Direction | Applies To   |
|-------------|--------|-----------|--------------|
| Red         | yes    | +         | ratios, bars |
| Yellow      | no     | n/a       | bars         |
| Green       | yes    | -         | ratios, bars |
| Pink        | yes    | +         | p-, q-Values |
| Light Green | yes    | -         | p-, q-Values |

Dot Plots Dot Plots

Summary Table

SgFn vs Sg

SgPg vs Sg

SgPgFn vs Sg

SgPg vs SgFn

SgPgFn vs SgFn

SgPgFn vs SgPg

Coverage

| Protein  | SgPg vs Sg             |                      |         |         | Raw     |         | Normalized |          | Description                                                  | Log <sub>2</sub> Ratios |    |    |   |   |   |   |
|----------|------------------------|----------------------|---------|---------|---------|---------|------------|----------|--------------------------------------------------------------|-------------------------|----|----|---|---|---|---|
|          | Log <sub>2</sub> Ratio | Log <sub>2</sub> Sum | q-Value | p-Value | SgPg    | Sg      | SgPg       | Sg       |                                                              | -6                      | -4 | -2 | 0 | 2 | 4 | 6 |
| SGO_0642 | -1.357                 | 7.044                | 0.0027  | 0.0063  | 15.000  | 39.500  | 22.3660    | 41.1080  | hypothetical protein SGO_0642                                |                         |    |    |   |   |   |   |
|          |                        |                      |         |         | 10.500  | 53.500  | 14.9855    | 53.5000  |                                                              |                         |    |    |   |   |   |   |
| SGO_0643 | -0.367                 | 4.720                | 0.0490  | 0.2176  | 3.000   | 6.000   | 4.4732     | 6.2443   | cytosine-specific methyltransferase                          |                         |    |    |   |   |   |   |
|          |                        |                      |         |         | 5.000   | 8.500   | 7.1360     | 8.5000   |                                                              |                         |    |    |   |   |   |   |
| SGO_0644 | 1.368                  | 6.862                | 0.0033  | 0.0081  | 33.000  | 16.000  | 49.2051    | 16.6514  | hypothetical protein SGO_0644                                |                         |    |    |   |   |   |   |
|          |                        |                      |         |         | 24.500  | 15.500  | 34.9662    | 15.5000  |                                                              |                         |    |    |   |   |   |   |
| SGO_0649 |                        | 2.322                |         |         |         |         |            |          | hypothetical protein SGO_0649                                |                         |    |    |   |   |   |   |
|          |                        |                      |         |         |         | 5.000   |            | 5.0000   |                                                              |                         |    |    |   |   |   |   |
| SGO_0652 | -3.768                 | 7.285                | 0.0002  | 0.0001  | 6.500   | 71.000  | 9.6919     | 73.8904  | hypothetical protein SGO_0652                                |                         |    |    |   |   |   |   |
|          |                        |                      |         |         | 2.000   | 69.500  | 2.8544     | 69.5000  |                                                              |                         |    |    |   |   |   |   |
| SGO_0653 | -0.400                 | 4.660                | 0.0528  | 0.2379  | 4.500   |         | 6.7098     |          | conserved hypothetical protein of unknown function (DUF1027) |                         |    |    |   |   |   |   |
|          |                        |                      |         |         | 6.000   | 10.000  | 8.5632     | 10.0000  |                                                              |                         |    |    |   |   |   |   |
| SGO_0654 | -0.815                 | 8.095                | 0.0039  | 0.0102  | 30.000  | 74.000  | 44.7319    | 77.0125  | radical SAM enzyme, Cfr family                               |                         |    |    |   |   |   |   |
|          |                        |                      |         |         | 38.000  | 97.500  | 54.2333    | 97.5000  |                                                              |                         |    |    |   |   |   |   |
| SGO_0656 | -0.846                 | 5.780                | 0.0012  | 0.0020  | 7.500   | 17.000  | 11.1830    | 17.6921  | trpB-2; tryptophan synthase, beta subunit                    |                         |    |    |   |   |   |   |
|          |                        |                      |         |         | 6.000   | 17.500  | 8.5632     | 17.5000  |                                                              |                         |    |    |   |   |   |   |
| SGO_0657 |                        | 1.322                |         |         |         |         |            |          | trpE; anthranilate synthase component I                      |                         |    |    |   |   |   |   |
|          |                        |                      |         |         |         | 2.500   |            | 2.5000   |                                                              |                         |    |    |   |   |   |   |
| SGO_0662 |                        | 1.585                |         |         |         |         |            |          | trpB-1; tryptophan synthase, beta subunit                    |                         |    |    |   |   |   |   |
|          |                        |                      |         |         |         | 3.000   |            | 3.0000   |                                                              |                         |    |    |   |   |   |   |
| SGO_0663 |                        | 1.000                |         |         |         |         |            |          | trpA-2; tryptophan synthase, alpha subunit                   |                         |    |    |   |   |   |   |
|          |                        |                      |         |         |         | 2.000   |            | 2.0000   |                                                              |                         |    |    |   |   |   |   |
| SGO_0665 | -0.422                 | 10.290               | 0.0218  | 0.0858  | 165.000 | 405.500 | 246.0255   | 422.0077 | non-heme iron-containing ferritin                            |                         |    |    |   |   |   |   |
|          |                        |                      |         |         | 200.000 | 298.500 | 285.4387   | 298.5000 |                                                              |                         |    |    |   |   |   |   |

- Show detected proteins only
- Show all proteins

Proteins found: 1179

Filter by category:  
ABC Transporter

Test

Cutoff

q-Value

.005

p-Value

|             | Signif | Direction | Applies To   |
|-------------|--------|-----------|--------------|
| Red         | yes    | +         | ratios, bars |
| Yellow      | no     | n/a       | bars         |
| Green       | yes    | -         | ratios, bars |
| Pink        | yes    | +         | p-, q-Values |
| Light Green | yes    | -         | p-, q-Values |

Dot Plots Dot Plots

Summary Table

SgFn vs Sg

SgPg vs Sg

SgPgFn vs Sg

SgPg vs SgFn

SgPgFn vs SgFn

SgPgFn vs SgPg

Coverage

| Protein  | SgPg vs Sg             |                      |         |         | Raw     |         | Normalized |          | Description                                                            | Log <sub>2</sub> Ratios |    |    |   |   |
|----------|------------------------|----------------------|---------|---------|---------|---------|------------|----------|------------------------------------------------------------------------|-------------------------|----|----|---|---|
|          | Log <sub>2</sub> Ratio | Log <sub>2</sub> Sum | q-Value | p-Value | SgPg    | Sg      | SgPg       | Sg       |                                                                        | -6                      | -4 | -2 | 0 | 2 |
| SGO_0667 | -1.961                 | 5.142                | 0.0011  | 0.0019  | 3.000   | 12.000  | 4.4732     | 12.4885  | rhodanese family protein                                               |                         |    |    |   |   |
|          |                        |                      |         |         | 2.000   | 15.500  | 2.8544     | 15.5000  |                                                                        |                         |    |    |   |   |
| SGO_0669 | 0.694                  | 8.122                | 0.0002  | 0.0001  | 57.500  | 49.000  | 85.7362    | 50.9948  | typA; GTP-binding protein TypA                                         |                         |    |    |   |   |
|          |                        |                      |         |         | 60.500  | 55.500  | 86.3452    | 55.5000  |                                                                        |                         |    |    |   |   |
| SGO_0671 | 0.437                  | 7.176                | 0.0084  | 0.0267  | 31.000  | 30.500  | 46.2230    | 31.7416  | murD; UDP-N-acetylmuramoylalanine--D-glutamate ligase                  |                         |    |    |   |   |
|          |                        |                      |         |         | 26.000  | 29.500  | 37.1070    | 29.5000  |                                                                        |                         |    |    |   |   |
| SGO_0672 | -1.494                 | 6.719                | 0.0073  | 0.0224  | 5.500   | 42.500  | 8.2009     | 44.2302  | murG; undecaprenyl-PP-MurNAc-pentapeptide-UDPGlcNAc GlcNAc transferase |                         |    |    |   |   |
|          |                        |                      |         |         | 15.000  | 31.500  | 21.4079    | 31.5000  |                                                                        |                         |    |    |   |   |
| SGO_0673 | -2.932                 | 6.419                | 0.0241  | 0.0961  | 3.500   | 33.500  | 5.2187     | 34.8638  | DivIB; cell division protein DivIB                                     |                         |    |    |   |   |
|          |                        |                      |         |         |         | 45.500  |            | 45.5000  |                                                                        |                         |    |    |   |   |
| SGO_0674 | 0.359                  | 9.105                | 0.0012  | 0.0021  | 107.500 | 114.000 | 160.2894   | 118.6409 | ftsA; cell division protein FtsA                                       |                         |    |    |   |   |
|          |                        |                      |         |         | 104.500 | 122.500 | 149.1417   | 122.5000 |                                                                        |                         |    |    |   |   |
| SGO_0675 | 0.507                  | 9.775                | 0.0084  | 0.0266  | 171.500 | 145.500 | 255.7174   | 151.4232 | ftsZ; cell division protein FtsZ                                       |                         |    |    |   |   |
|          |                        |                      |         |         | 179.000 | 213.500 | 255.4676   | 213.5000 |                                                                        |                         |    |    |   |   |
| SGO_0676 | 0.129                  | 6.116                | 0.1080  | 0.5380  | 10.000  | 13.500  | 14.9106    | 14.0496  | conserved hypothetical protein TIGR00044                               |                         |    |    |   |   |
|          |                        |                      |         |         | 15.000  | 19.000  | 21.4079    | 19.0000  |                                                                        |                         |    |    |   |   |
| SGO_0677 | -0.679                 | 8.372                | 0.0077  | 0.0236  | 37.500  | 111.000 | 55.9149    | 115.5188 | ylmF protein                                                           |                         |    |    |   |   |
|          |                        |                      |         |         | 50.000  | 88.500  | 71.3597    | 88.5000  |                                                                        |                         |    |    |   |   |
| SGO_0680 | 0.819                  | 9.042                | 0.0017  | 0.0035  | 103.000 | 93.500  | 153.5796   | 97.3063  | cell division protein DivIVA                                           |                         |    |    |   |   |
|          |                        |                      |         |         | 128.500 | 93.000  | 183.3944   | 93.0000  |                                                                        |                         |    |    |   |   |
| SGO_0681 | 0.809                  | 8.932                | 0.0014  | 0.0026  | 106.000 | 74.500  | 158.0528   | 77.5329  | ileS; isoleucyl-tRNA synthetase                                        |                         |    |    |   |   |
|          |                        |                      |         |         | 106.500 | 101.000 | 151.9961   | 101.0000 |                                                                        |                         |    |    |   |   |
| SGO_0684 | -1.462                 | 8.112                | 0.0000  | 0.0000  | 25.000  | 97.000  | 37.2766    | 100.9488 | hypothetical protein SGO_0684                                          |                         |    |    |   |   |
|          |                        |                      |         |         | 25.500  | 102.000 | 36.3934    | 102.0000 |                                                                        |                         |    |    |   |   |

- Show detected proteins only
- Show all proteins

Proteins found: 1179

Filter by category:

ABC Transporter

Test

Cutoff

q-Value

p-Value

.005

| Signif | Direction | Applies To   |
|--------|-----------|--------------|
| yes    | +         | ratios, bars |
| no     | n/a       | bars         |
| yes    | -         | ratios, bars |
| yes    | +         | p-, q-Values |
| yes    | -         | p-, q-Values |

Dot Plots Dot Plots



Summary Table

SgFn vs Sg

SgPg vs Sg

SgPgFn vs Sg

SgPg vs SgFn

SgPgFn vs SgFn

SgPgFn vs SgPg

Coverage

| Protein  | SgPg vs Sg             |                      |         |         | Raw    |        | Normalized |         | Description                                           | Log <sub>2</sub> Ratios |    |    |   |   |   |   |
|----------|------------------------|----------------------|---------|---------|--------|--------|------------|---------|-------------------------------------------------------|-------------------------|----|----|---|---|---|---|
|          | Log <sub>2</sub> Ratio | Log <sub>2</sub> Sum | q-Value | p-Value | SgPg   | Sg     | SgPg       | Sg      |                                                       | -6                      | -4 | -2 | 0 | 2 | 4 | 6 |
| SGO_0685 |                        | 2.170                |         |         |        |        |            |         | MutT/nudix family protein                             |                         |    |    |   |   |   |   |
|          |                        |                      |         |         |        | 4.500  |            | 4.5000  |                                                       |                         |    |    |   |   |   |   |
| SGO_0688 | -0.104                 | 8.168                | 0.0159  | 0.0586  | 48.000 | 73.500 | 71.5711    | 76.4922 | ATP dependent Clp protease, ATP-binding subunit, ClpE |                         |    |    |   |   |   |   |
|          |                        |                      |         |         | 47.000 | 72.500 | 67.0781    | 72.5000 |                                                       |                         |    |    |   |   |   |   |
| SGO_0689 |                        | 3.170                |         |         |        |        |            |         | hypothetical protein SGO_0689                         |                         |    |    |   |   |   |   |
|          |                        |                      |         |         |        | 9.000  |            | 9.0000  |                                                       |                         |    |    |   |   |   |   |
| SGO_0690 | 0.338                  | 3.866                | 0.1779  | 0.9520  |        | 2.000  |            | 2.0814  | foID; methenyltetrahydrofolate cyclohydrolase         |                         |    |    |   |   |   |   |
|          |                        |                      |         |         | 3.500  | 7.500  | 4.9952     | 7.5000  |                                                       |                         |    |    |   |   |   |   |
| SGO_0693 | -2.268                 | 5.513                | 0.0024  | 0.0053  | 4.500  | 20.000 | 6.7098     | 20.8142 | xseA; exodeoxyribonuclease VII, large subunit         |                         |    |    |   |   |   |   |
|          |                        |                      |         |         | 1.500  | 16.000 | 2.1408     | 16.0000 |                                                       |                         |    |    |   |   |   |   |
| SGO_0694 | 0.972                  | 4.814                |         |         | 12.500 |        | 18.6383    |         | xseB; exodeoxyribonuclease VII, small subunit         |                         |    |    |   |   |   |   |
|          |                        |                      |         |         |        | 9.500  |            | 9.5000  |                                                       |                         |    |    |   |   |   |   |
| SGO_0695 |                        | 3.321                |         |         |        |        |            |         | geranyltranstransferase                               |                         |    |    |   |   |   |   |
|          |                        |                      |         |         | 7.000  |        | 9.9904     |         |                                                       |                         |    |    |   |   |   |   |
| SGO_0696 |                        | 3.029                |         |         |        | 4.000  |            | 4.1628  | hemolysin-like protein                                |                         |    |    |   |   |   |   |
|          |                        |                      |         |         |        | 4.000  |            | 4.0000  |                                                       |                         |    |    |   |   |   |   |
| SGO_0697 | 0.936                  | 3.253                | 0.0636  | 0.2947  | 3.000  | 1.500  | 4.4732     | 1.5611  | transcription regulator                               |                         |    |    |   |   |   |   |
|          |                        |                      |         |         |        | 3.500  |            | 3.5000  |                                                       |                         |    |    |   |   |   |   |
| SGO_0698 | 0.402                  | 5.779                | 0.0587  | 0.2686  | 9.500  | 8.000  | 14.1651    | 8.3257  | recN; DNA repair protein RecN                         |                         |    |    |   |   |   |   |
|          |                        |                      |         |         | 11.500 | 16.000 | 16.4127    | 16.0000 |                                                       |                         |    |    |   |   |   |   |
| SGO_0699 | 0.342                  | 4.783                | 0.0207  | 0.0805  | 5.500  | 5.000  | 8.2009     | 5.2035  | Serine/threonine protein phosphatase                  |                         |    |    |   |   |   |   |
|          |                        |                      |         |         | 5.000  | 7.000  | 7.1360     | 7.0000  |                                                       |                         |    |    |   |   |   |   |
| SGO_0700 | 0.522                  | 6.310                | 0.0140  | 0.0498  | 14.000 | 18.500 | 20.8749    | 19.2531 | DegV family protein                                   |                         |    |    |   |   |   |   |
|          |                        |                      |         |         | 18.000 | 13.500 | 25.6895    | 13.5000 |                                                       |                         |    |    |   |   |   |   |

- Show detected proteins only
- Show all proteins

Proteins found: 1179

Filter by category:

ABC Transporter

Test

Cutoff

q-Value

p-Value

.005

|             | Signif | Direction | Applies To   |
|-------------|--------|-----------|--------------|
| Red         | yes    | +         | ratios, bars |
| Yellow      | no     | n/a       | bars         |
| Green       | yes    | -         | ratios, bars |
| Pink        | yes    | +         | p-, q-Values |
| Light Green | yes    | -         | p-, q-Values |

Dot Plots Dot Plots

Summary Table

SgFn vs Sg

SgPg vs Sg

SgPgFn vs Sg

SgPg vs SgFn

SgPgFn vs SgFn

SgPgFn vs SgPg

Coverage

| Protein  | SgPg vs Sg             |                      |         |         | Raw      |          | Normalized |           | Description                                                     | Log <sub>2</sub> Ratios |    |    |   |   |
|----------|------------------------|----------------------|---------|---------|----------|----------|------------|-----------|-----------------------------------------------------------------|-------------------------|----|----|---|---|
|          | Log <sub>2</sub> Ratio | Log <sub>2</sub> Sum | q-Value | p-Value | SgPg     | Sg       | SgPg       | Sg        |                                                                 | -6                      | -4 | -2 | 0 | 2 |
| SGO_0701 | 1.056                  | 12.649               | 0.0002  | 0.0001  | 1475.000 | 1072.000 | 2199.3191  | 1115.6407 | hup; DNA-binding histone-like protein HU                        |                         |    |    |   |   |
|          |                        |                      |         |         | 1496.500 | 974.000  | 2135.7949  | 974.0000  |                                                                 |                         |    |    |   |   |
| SGO_0704 | 1.791                  | 11.120               | 0.0004  | 0.0004  | 559.500  | 193.000  | 834.2502   | 200.8570  | gpmA; 2,3-bisphosphoglycerate-dependent phosphoglycerate mutase |                         |    |    |   |   |
|          |                        |                      |         |         | 619.500  | 306.500  | 884.1463   | 306.5000  |                                                                 |                         |    |    |   |   |
| SGO_0705 |                        | 1.807                |         |         |          |          |            |           | Protein of unknown function (DUF1250) superfamily               |                         |    |    |   |   |
|          |                        |                      |         |         |          | 3.500    |            | 3.5000    |                                                                 |                         |    |    |   |   |
| SGO_0706 | 1.431                  | 5.021                | 0.0017  | 0.0035  | 8.000    | 3.000    | 11.9285    | 3.1221    | phoH-like protein                                               |                         |    |    |   |   |
|          |                        |                      |         |         | 8.000    | 6.000    | 11.4175    | 6.0000    |                                                                 |                         |    |    |   |   |
| SGO_0707 | -5.103                 | 8.777                | 0.0000  | 0.0000  | 6.000    | 206.000  | 8.9464     | 214.3862  | LPXTG cell wall surface protein                                 |                         |    |    |   |   |
|          |                        |                      |         |         | 3.000    | 211.000  | 4.2816     | 211.0000  |                                                                 |                         |    |    |   |   |
| SGO_0708 | 0.702                  | 9.607                | 0.0002  | 0.0001  | 162.000  | 137.000  | 241.5523   | 142.5772  | ald; alanine dehydrogenase                                      |                         |    |    |   |   |
|          |                        |                      |         |         | 169.000  | 154.500  | 241.1957   | 154.5000  |                                                                 |                         |    |    |   |   |
| SGO_0711 |                        | 3.145                |         |         |          | 8.500    |            | 8.8460    | conserved hypothetical protein TIGR00043                        |                         |    |    |   |   |
|          |                        |                      |         |         |          |          |            |           |                                                                 |                         |    |    |   |   |
| SGO_0713 | 0.586                  | 7.177                | 0.0059  | 0.0173  | 32.500   | 29.500   | 48.4596    | 30.7009   | sgg; GTP-binding protein Era                                    |                         |    |    |   |   |
|          |                        |                      |         |         | 27.000   | 27.000   | 38.5342    | 27.0000   |                                                                 |                         |    |    |   |   |
| SGO_0715 | -0.001                 | 3.321                |         |         |          |          |            |           | mutM; formamidopyrimidine-DNA glycosylase                       |                         |    |    |   |   |
|          |                        |                      |         |         | 3.500    | 5.000    | 4.9952     | 5.0000    |                                                                 |                         |    |    |   |   |
| SGO_0719 | -2.061                 | 5.620                | 0.0009  | 0.0013  | 3.500    | 17.000   | 5.2187     | 17.6921   | rnr; ribonuclease R                                             |                         |    |    |   |   |
|          |                        |                      |         |         | 3.000    | 22.000   | 4.2816     | 22.0000   |                                                                 |                         |    |    |   |   |
| SGO_0721 | 0.112                  | 5.337                | 0.0947  | 0.4647  | 6.000    | 8.500    | 8.9464     | 8.8460    | abpB-like dipeptidase lipoprotein                               |                         |    |    |   |   |
|          |                        |                      |         |         | 8.500    | 10.500   | 12.1311    | 10.5000   |                                                                 |                         |    |    |   |   |
| SGO_0722 | 0.624                  | 6.153                | 0.0651  | 0.3027  | 14.000   | 7.500    | 20.8749    | 7.8053    | tehB; tellurite resistance protein TehB                         |                         |    |    |   |   |
|          |                        |                      |         |         | 14.000   | 22.500   | 19.9807    | 22.5000   |                                                                 |                         |    |    |   |   |

- Show detected proteins only
- Show all proteins

Proteins found: 1179

Filter by category:

ABC Transporter

Test

Cutoff

q-Value

.005

p-Value

|             | Signif | Direction | Applies To   |
|-------------|--------|-----------|--------------|
| Red         | yes    | +         | ratios, bars |
| Yellow      | no     | n/a       | bars         |
| Green       | yes    | -         | ratios, bars |
| Pink        | yes    | +         | p-, q-Values |
| Light Green | yes    | -         | p-, q-Values |

Dot Plots Dot Plots

Summary Table

SgFn vs Sg

SgPg vs Sg

SgPgFn vs Sg

SgPg vs SgFn

SgPgFn vs SgFn

SgPgFn vs SgPg

Coverage

| Protein  | SgPg vs Sg             |                      |         |         | Raw    |        | Normalized |         | Description                                           | Log <sub>2</sub> Ratios |    |    |   |   |
|----------|------------------------|----------------------|---------|---------|--------|--------|------------|---------|-------------------------------------------------------|-------------------------|----|----|---|---|
|          | Log <sub>2</sub> Ratio | Log <sub>2</sub> Sum | q-Value | p-Value | SgPg   | Sg     | SgPg       | Sg      |                                                       | -6                      | -4 | -2 | 0 | 2 |
| SGO_0724 | -2.408                 | 6.437                | 0.0004  | 0.0003  | 4.000  | 32.500 | 5.9643     | 33.8231 | dipeptidase                                           |                         |    |    |   |   |
|          |                        |                      |         |         | 5.500  | 39.000 | 7.8496     | 39.0000 |                                                       |                         |    |    |   |   |
| SGO_0728 |                        | 2.000                |         |         |        |        |            |         | ABC transporter, ATP-binding protein SP1653           |                         |    |    |   |   |
|          |                        |                      |         |         |        | 4.000  |            | 4.0000  |                                                       |                         |    |    |   |   |
| SGO_0729 |                        | 3.022                |         |         |        | 3.000  |            | 3.1221  | ABC transporter permease protein                      |                         |    |    |   |   |
|          |                        |                      |         |         |        | 5.000  |            | 5.0000  |                                                       |                         |    |    |   |   |
| SGO_0731 |                        | 4.120                |         |         |        | 9.500  |            | 9.8867  | RRF2 family protein                                   |                         |    |    |   |   |
|          |                        |                      |         |         |        | 7.500  |            | 7.5000  |                                                       |                         |    |    |   |   |
| SGO_0736 | -1.037                 | 5.520                | 0.0033  | 0.0081  | 4.000  | 16.000 | 5.9643     | 16.6514 | hprK; HPr(Ser) kinase/phosphatase                     |                         |    |    |   |   |
|          |                        |                      |         |         | 6.500  | 14.000 | 9.2768     | 14.0000 |                                                       |                         |    |    |   |   |
| SGO_0737 |                        | 4.348                |         |         |        | 9.000  |            | 9.3664  | lgt; prolipoprotein diacylglyceryl transferase        |                         |    |    |   |   |
|          |                        |                      |         |         |        | 11.000 |            | 11.0000 |                                                       |                         |    |    |   |   |
| SGO_0738 | -3.482                 | 7.062                | 0.0005  | 0.0006  | 4.000  | 65.000 | 5.9643     | 67.6461 | Bacterial protein of unknown function (DUF948) family |                         |    |    |   |   |
|          |                        |                      |         |         | 3.500  | 55.000 | 4.9952     | 55.0000 |                                                       |                         |    |    |   |   |
| SGO_0739 | 0.984                  | 5.964                | 0.0021  | 0.0046  | 12.500 | 11.000 | 18.6383    | 11.4478 | hypothetical protein SGO_0739                         |                         |    |    |   |   |
|          |                        |                      |         |         | 16.000 | 9.500  | 22.8351    | 9.5000  |                                                       |                         |    |    |   |   |
| SGO_0742 | 0.310                  | 6.232                | 0.0039  | 0.0104  | 14.000 | 15.000 | 20.8749    | 15.6106 | peptidase, U32 family                                 |                         |    |    |   |   |
|          |                        |                      |         |         | 14.500 | 18.000 | 20.6943    | 18.0000 |                                                       |                         |    |    |   |   |
| SGO_0743 | -1.241                 | 7.933                | 0.0005  | 0.0007  | 28.000 | 80.000 | 41.7498    | 83.2568 | peptidase, U32 family                                 |                         |    |    |   |   |
|          |                        |                      |         |         | 22.000 | 88.000 | 31.3983    | 88.0000 |                                                       |                         |    |    |   |   |
| SGO_0745 | 2.842                  | 7.443                | 0.0002  | 0.0001  | 48.500 | 8.000  | 72.3166    | 8.3257  | hypothetical protein SGO_0745                         |                         |    |    |   |   |
|          |                        |                      |         |         | 56.000 | 13.500 | 79.9228    | 13.5000 |                                                       |                         |    |    |   |   |
| SGO_0749 | 1.249                  | 6.844                | 0.0018  | 0.0038  | 29.000 | 13.000 | 43.2408    | 13.5292 | glutathione reductase                                 |                         |    |    |   |   |
|          |                        |                      |         |         | 26.000 | 21.000 | 37.1070    | 21.0000 |                                                       |                         |    |    |   |   |

- Show detected proteins only
- Show all proteins

Proteins found: 1179

Filter by category:

ABC Transporter

Test

Cutoff

q-Value

.005

p-Value

|  | Signif | Direction | Applies To   |
|--|--------|-----------|--------------|
|  | yes    | +         | ratios, bars |
|  | no     | n/a       | bars         |
|  | yes    | -         | ratios, bars |
|  | yes    | +         | p-, q-Values |
|  | yes    | -         | p-, q-Values |

Dot Plots Dot Plots

Summary Table

SgFn vs Sg

SgPg vs Sg

SgPgFn vs Sg

SgPg vs SgFn

SgPgFn vs SgFn

SgPgFn vs SgPg

Coverage

| Protein  | SgPg vs Sg             |                      |         |         | Raw      |          | Normalized |           | Description                                               | Log <sub>2</sub> Ratios |    |    |   |   |
|----------|------------------------|----------------------|---------|---------|----------|----------|------------|-----------|-----------------------------------------------------------|-------------------------|----|----|---|---|
|          | Log <sub>2</sub> Ratio | Log <sub>2</sub> Sum | q-Value | p-Value | SgPg     | Sg       | SgPg       | Sg        |                                                           | -6                      | -4 | -2 | 0 | 2 |
| SGO_0750 | -1.521                 | 10.797               | 0.0013  | 0.0023  | 160.000  | 708.000  | 238.5702   | 736.8224  | efflux transporter, RND family, MFP subunit subfamily     |                         |    |    |   |   |
|          |                        |                      |         |         | 153.500  | 584.500  | 219.0742   | 584.5000  |                                                           |                         |    |    |   |   |
| SGO_0751 | 0.115                  | 8.412                | 0.0791  | 0.3822  | 67.500   | 82.500   | 100.6468   | 85.8585   | ABC transporter, ATP-binding protein SP0786               |                         |    |    |   |   |
|          |                        |                      |         |         | 54.000   | 77.000   | 77.0684    | 77.0000   |                                                           |                         |    |    |   |   |
| SGO_0752 | -1.394                 | 7.621                | 0.0017  | 0.0034  | 18.000   | 60.000   | 26.8391    | 62.4426   | ABC transporter, ATP-binding protein                      |                         |    |    |   |   |
|          |                        |                      |         |         | 19.000   | 80.500   | 27.1167    | 80.5000   |                                                           |                         |    |    |   |   |
| SGO_0753 | 0.038                  | 9.150                | 0.1267  | 0.6427  | 101.500  | 144.000  | 151.3430   | 149.8622  | lysS; lysyl-tRNA synthetase                               |                         |    |    |   |   |
|          |                        |                      |         |         | 95.500   | 130.500  | 136.2970   | 130.5000  |                                                           |                         |    |    |   |   |
| SGO_0754 |                        | 1.835                |         |         |          |          |            |           | phosphoglycerate mutase family protein                    |                         |    |    |   |   |
|          |                        |                      |         |         | 2.500    |          | 3.5680     |           |                                                           |                         |    |    |   |   |
| SGO_0755 | 0.647                  | 5.566                | 0.0123  | 0.0424  | 8.000    | 8.000    | 11.9285    | 8.3257    | regulatory protein                                        |                         |    |    |   |   |
|          |                        |                      |         |         | 12.000   | 10.000   | 17.1263    | 10.0000   |                                                           |                         |    |    |   |   |
| SGO_0757 |                        | 6.945                |         |         |          | 66.000   |            | 68.6868   | peptidase, U32 family                                     |                         |    |    |   |   |
|          |                        |                      |         |         |          | 54.500   |            | 54.5000   |                                                           |                         |    |    |   |   |
| SGO_0760 | 0.615                  | 9.269                | 0.0000  | 0.0000  | 125.500  | 117.000  | 187.1285   | 121.7630  | ppc; phosphoenolpyruvate carboxylase                      |                         |    |    |   |   |
|          |                        |                      |         |         | 130.500  | 122.000  | 186.2487   | 122.0000  |                                                           |                         |    |    |   |   |
| SGO_0761 | 0.462                  | 13.435               | 0.0010  | 0.0017  | 2246.500 | 2223.000 | 3349.6748  | 2313.4975 | tuf; translation elongation factor Tu                     |                         |    |    |   |   |
|          |                        |                      |         |         | 2149.500 | 2341.000 | 3067.7522  | 2341.0000 |                                                           |                         |    |    |   |   |
| SGO_0762 | 0.868                  | 11.183               | 0.0047  | 0.0131  | 581.000  | 384.500  | 866.3081   | 400.1528  | tpiA; triosephosphate isomerase                           |                         |    |    |   |   |
|          |                        |                      |         |         | 449.500  | 417.000  | 641.5234   | 417.0000  |                                                           |                         |    |    |   |   |
| SGO_0763 | -1.037                 | 8.173                | 0.0008  | 0.0011  | 29.500   | 87.500   | 43.9864    | 91.0621   | murA-1; UDP-N-acetylglucosamine 1-carboxyvinyltransferase |                         |    |    |   |   |
|          |                        |                      |         |         | 35.500   | 103.000  | 50.6654    | 103.0000  |                                                           |                         |    |    |   |   |
| SGO_0765 |                        | 4.959                |         |         |          | 15.000   |            | 15.6106   | endA; DNA-entry nuclease                                  |                         |    |    |   |   |
|          |                        |                      |         |         |          | 15.500   |            | 15.5000   |                                                           |                         |    |    |   |   |

- Show detected proteins only
- Show all proteins

Proteins found: 1179

Filter by category:

ABC Transporter

Test

Cutoff

q-Value

.005

p-Value

| Signif | Direction | Applies To   |
|--------|-----------|--------------|
| yes    | +         | ratios, bars |
| no     | n/a       | bars         |
| yes    | -         | ratios, bars |
| yes    | +         | p-, q-Values |
| yes    | -         | p-, q-Values |

Dot Plots Dot Plots

Summary Table

SgFn vs Sg

SgPg vs Sg

SgPgFn vs Sg

SgPg vs SgFn

SgPgFn vs SgFn

SgPgFn vs SgPg

Coverage

| Protein  | SgPg vs Sg             |                      |         |         | Raw     |         | Normalized |          | Description                                               | Log <sub>2</sub> Ratios |    |    |   |   |
|----------|------------------------|----------------------|---------|---------|---------|---------|------------|----------|-----------------------------------------------------------|-------------------------|----|----|---|---|
|          | Log <sub>2</sub> Ratio | Log <sub>2</sub> Sum | q-Value | p-Value | SgPg    | Sg      | SgPg       | Sg       |                                                           | -6                      | -4 | -2 | 0 | 2 |
| SGO_0767 | -0.180                 | 5.377                | 0.0674  | 0.3152  | 5.500   | 11.000  | 8.2009     | 11.4478  | transport protein                                         |                         |    |    |   |   |
|          |                        |                      |         |         | 8.000   | 10.500  | 11.4175    | 10.5000  |                                                           |                         |    |    |   |   |
| SGO_0771 | 1.279                  | 8.306                | 0.0013  | 0.0023  | 73.000  | 56.000  | 108.8477   | 58.2797  | pepqr; proline dipeptidase                                |                         |    |    |   |   |
|          |                        |                      |         |         | 79.500  | 36.000  | 113.4619   | 36.0000  |                                                           |                         |    |    |   |   |
| SGO_0773 | -2.406                 | 10.223               | 0.0002  | 0.0001  | 68.500  | 508.000 | 102.1379   | 528.6805 | ccpA; catabolite control protein A                        |                         |    |    |   |   |
|          |                        |                      |         |         | 61.500  | 476.500 | 87.7724    | 476.5000 |                                                           |                         |    |    |   |   |
| SGO_0774 | -1.574                 | 7.142                | 0.0017  | 0.0036  | 14.500  | 56.500  | 21.6204    | 58.8001  | glycosyl transferase, group 1 family protein              |                         |    |    |   |   |
|          |                        |                      |         |         | 10.000  | 46.500  | 14.2719    | 46.5000  |                                                           |                         |    |    |   |   |
| SGO_0775 | -0.719                 | 6.433                | 0.0052  | 0.0149  | 9.500   | 28.500  | 14.1651    | 29.6602  | glycosyl transferase, group 1                             |                         |    |    |   |   |
|          |                        |                      |         |         | 13.000  | 24.000  | 18.5535    | 24.0000  |                                                           |                         |    |    |   |   |
| SGO_0778 | -0.132                 | 9.237                | 0.0068  | 0.0204  | 94.000  | 148.000 | 140.1600   | 154.0250 | thrS; threonyl-tRNA synthetase                            |                         |    |    |   |   |
|          |                        |                      |         |         | 103.500 | 161.500 | 147.7145   | 161.5000 |                                                           |                         |    |    |   |   |
| SGO_0779 | 0.258                  | 6.808                | 0.0709  | 0.3336  | 23.500  | 19.500  | 35.0400    | 20.2938  | response regulator                                        |                         |    |    |   |   |
|          |                        |                      |         |         | 18.000  | 31.000  | 25.6895    | 31.0000  |                                                           |                         |    |    |   |   |
| SGO_0780 | -2.189                 | 5.620                | 0.0017  | 0.0034  | 3.000   | 22.500  | 4.4732     | 23.4160  | histidine kinase                                          |                         |    |    |   |   |
|          |                        |                      |         |         | 3.000   | 17.000  | 4.2816     | 17.0000  |                                                           |                         |    |    |   |   |
| SGO_0781 |                        | 5.091                |         |         |         | 14.500  |            | 15.0903  | vicX; Zn-dependent hydrolase (beta-lactamase superfamily) |                         |    |    |   |   |
|          |                        |                      |         |         |         | 19.000  |            | 19.0000  |                                                           |                         |    |    |   |   |
| SGO_0782 |                        | 3.665                |         |         |         | 4.500   |            | 4.6832   | Protein of unknown function (DUF454) family               |                         |    |    |   |   |
|          |                        |                      |         |         |         | 8.000   |            | 8.0000   |                                                           |                         |    |    |   |   |
| SGO_0784 | -1.759                 | 8.327                | 0.0011  | 0.0018  | 24.000  | 105.500 | 35.7855    | 109.7949 | smc; chromosome segregation protein SMC                   |                         |    |    |   |   |
|          |                        |                      |         |         | 26.000  | 138.500 | 37.1070    | 138.5000 |                                                           |                         |    |    |   |   |
| SGO_0785 | -0.875                 | 4.804                | 0.0299  | 0.1232  | 4.000   | 11.500  | 5.9643     | 11.9682  | Cof family protein                                        |                         |    |    |   |   |
|          |                        |                      |         |         |         | 10.000  |            | 10.0000  |                                                           |                         |    |    |   |   |

- Show detected proteins only
- Show all proteins

Proteins found: 1179

Filter by category:

ABC Transporter

Test

Cutoff

q-Value

.005

p-Value

| Signif | Direction | Applies To   |
|--------|-----------|--------------|
| yes    | +         | ratios, bars |
| no     | n/a       | bars         |
| yes    | -         | ratios, bars |
| yes    | +         | p-, q-Values |
| yes    | -         | p-, q-Values |

Dot Plots Dot Plots

Summary Table

SgFn vs Sg

SgPg vs Sg

SgPgFn vs Sg

SgPg vs SgFn

SgPgFn vs SgFn

SgPgFn vs SgPg

Coverage

| Protein  | SgPg vs Sg             |                      |         |         | Raw     |        | Normalized |         | Description                                 | Log <sub>2</sub> Ratios |    |    |   |   |
|----------|------------------------|----------------------|---------|---------|---------|--------|------------|---------|---------------------------------------------|-------------------------|----|----|---|---|
|          | Log <sub>2</sub> Ratio | Log <sub>2</sub> Sum | q-Value | p-Value | SgPg    | Sg     | SgPg       | Sg      |                                             | -6                      | -4 | -2 | 0 | 2 |
| SGO_0786 | 0.800                  | 6.061                | 0.0010  | 0.0015  | 14.500  | 10.500 | 21.6204    | 10.9275 | Cof family protein                          |                         |    |    |   |   |
|          |                        |                      |         |         | 14.500  | 13.500 | 20.6943    | 13.5000 |                                             |                         |    |    |   |   |
| SGO_0787 | -0.273                 | 7.598                | 0.0142  | 0.0509  | 29.500  | 56.000 | 43.9864    | 58.2797 | ftsY; cell division protein FtsY            |                         |    |    |   |   |
|          |                        |                      |         |         | 30.500  | 48.000 | 43.5294    | 48.0000 |                                             |                         |    |    |   |   |
| SGO_0788 | 1.244                  | 7.437                | 0.0003  | 0.0002  | 40.000  | 27.000 | 59.6426    | 28.0992 | zwf; glucose-6-phosphate 1-dehydrogenase    |                         |    |    |   |   |
|          |                        |                      |         |         | 43.500  | 23.500 | 62.0829    | 23.5000 |                                             |                         |    |    |   |   |
| SGO_0792 | -0.585                 | 7.246                | 0.0105  | 0.0350  | 23.000  | 38.000 | 34.2945    | 39.5470 | hypothetical protein SGO_0792               |                         |    |    |   |   |
|          |                        |                      |         |         | 18.500  | 51.500 | 26.4031    | 51.5000 |                                             |                         |    |    |   |   |
| SGO_0794 | -0.049                 | 7.789                | 0.1049  | 0.5188  | 35.000  | 50.000 | 52.1872    | 52.0355 | metallo-beta-lactamase family protein       |                         |    |    |   |   |
|          |                        |                      |         |         | 39.500  | 60.500 | 56.3741    | 60.5000 |                                             |                         |    |    |   |   |
| SGO_0795 | 1.371                  | 5.264                | 0.0002  | 0.0001  | 9.000   | 5.500  | 13.4196    | 5.7239  | tributyryn esterase                         |                         |    |    |   |   |
|          |                        |                      |         |         | 10.000  | 5.000  | 14.2719    | 5.0000  |                                             |                         |    |    |   |   |
| SGO_0797 |                        | 3.322                |         |         |         |        |            |         | RocB protein, putative                      |                         |    |    |   |   |
|          |                        |                      |         |         |         | 10.000 |            | 10.0000 |                                             |                         |    |    |   |   |
| SGO_0798 | -1.256                 | 7.768                | 0.0009  | 0.0013  | 22.500  | 80.000 | 33.5489    | 83.2568 | ABC transporter, ATP-binding protein SP1381 |                         |    |    |   |   |
|          |                        |                      |         |         | 21.500  | 70.500 | 30.6847    | 70.5000 |                                             |                         |    |    |   |   |
| SGO_0800 | -1.446                 | 6.450                | 0.0120  | 0.0409  | 7.000   | 21.000 | 10.4374    | 21.8549 | polysaccharide deacetylase family protein   |                         |    |    |   |   |
|          |                        |                      |         |         | 8.500   | 43.000 | 12.1311    | 43.0000 |                                             |                         |    |    |   |   |
| SGO_0801 | 1.139                  | 8.955                | 0.0003  | 0.0002  | 111.500 | 80.500 | 166.2536   | 83.7771 | hom; homoserine dehydrogenase               |                         |    |    |   |   |
|          |                        |                      |         |         | 122.500 | 71.500 | 174.8312   | 71.5000 |                                             |                         |    |    |   |   |
| SGO_0802 | 0.767                  | 6.782                | 0.0003  | 0.0002  | 23.000  | 18.500 | 34.2945    | 19.2531 | thrB; homoserine kinase                     |                         |    |    |   |   |
|          |                        |                      |         |         | 24.500  | 21.500 | 34.9662    | 21.5000 |                                             |                         |    |    |   |   |
| SGO_0803 | -1.866                 | 7.889                | 0.0002  | 0.0001  | 16.500  | 86.000 | 24.6026    | 89.5010 | hypothetical protein SGO_0803               |                         |    |    |   |   |
|          |                        |                      |         |         | 18.500  | 96.500 | 26.4031    | 96.5000 |                                             |                         |    |    |   |   |

- Show detected proteins only
- Show all proteins

Proteins found: 1179

Filter by category:

ABC Transporter

Test

Cutoff

q-Value

.005

p-Value

| Signif | Direction | Applies To   |
|--------|-----------|--------------|
| yes    | +         | ratios, bars |
| no     | n/a       | bars         |
| yes    | -         | ratios, bars |
| yes    | +         | p-, q-Values |
| yes    | -         | p-, q-Values |

Dot Plots Dot Plots

Summary Table

SgFn vs Sg

SgPg vs Sg

SgPgFn vs Sg

SgPg vs SgFn

SgPgFn vs SgFn

SgPgFn vs SgPg

Coverage

SgPg vs Sg

Raw

Normalized

Log<sub>2</sub> Ratios

| Protein  | SgPg vs Sg             |                      |         |         | Raw     |        | Normalized |         | Description                                                      | Log <sub>2</sub> Ratios |    |    |   |   |   |   |
|----------|------------------------|----------------------|---------|---------|---------|--------|------------|---------|------------------------------------------------------------------|-------------------------|----|----|---|---|---|---|
|          | Log <sub>2</sub> Ratio | Log <sub>2</sub> Sum | q-Value | p-Value | SgPg    | Sg     | SgPg       | Sg      |                                                                  | -6                      | -4 | -2 | 0 | 2 | 4 | 6 |
| SGO_0804 | -0.227                 | 4.969                | 0.0921  | 0.4499  | 5.000   | 4.000  | 7.4553     | 4.1628  | murB; UDP-N-acetylenolpyruvoylglucosamine reductase              |                         |    |    |   |   |   |   |
|          |                        |                      |         |         | 4.000   | 14.000 | 5.7088     | 14.0000 |                                                                  |                         |    |    |   |   |   |   |
| SGO_0805 | -2.598                 | 6.570                | 0.0004  | 0.0005  | 3.500   | 42.000 | 5.2187     | 43.7098 | potA; spermidine/putrescine ABC transporter, ATP-binding subunit |                         |    |    |   |   |   |   |
|          |                        |                      |         |         | 6.000   | 37.500 | 8.5632     | 37.5000 |                                                                  |                         |    |    |   |   |   |   |
| SGO_0806 |                        | 4.271                |         |         |         | 7.500  |            | 7.8053  | potB; spermidine/putrescine ABC transporter, permease protein    |                         |    |    |   |   |   |   |
|          |                        |                      |         |         |         | 11.500 |            | 11.5000 |                                                                  |                         |    |    |   |   |   |   |
| SGO_0808 | -3.301                 | 6.773                | 0.0501  | 0.2239  |         | 33.500 |            | 34.8638 | potD; spermidine/putrescine ABC transporter                      |                         |    |    |   |   |   |   |
|          |                        |                      |         |         | 3.500   | 69.500 | 4.9952     | 69.5000 |                                                                  |                         |    |    |   |   |   |   |
| SGO_0812 | -0.235                 | 4.916                | 0.0150  | 0.0547  | 4.500   | 8.500  | 6.7098     | 8.8460  | hypothetical protein SGO_0812                                    |                         |    |    |   |   |   |   |
|          |                        |                      |         |         | 5.000   | 7.500  | 7.1360     | 7.5000  |                                                                  |                         |    |    |   |   |   |   |
| SGO_0813 |                        | 1.807                |         |         |         |        |            |         | fructose-bisphosphatase                                          |                         |    |    |   |   |   |   |
|          |                        |                      |         |         |         | 3.500  |            | 3.5000  |                                                                  |                         |    |    |   |   |   |   |
| SGO_0814 | 0.665                  | 3.541                |         |         |         |        |            |         | aminotransferase, class-V                                        |                         |    |    |   |   |   |   |
|          |                        |                      |         |         | 5.000   | 4.500  | 7.1360     | 4.5000  |                                                                  |                         |    |    |   |   |   |   |
| SGO_0815 | -0.231                 | 7.574                | 0.0182  | 0.0693  | 31.500  | 46.000 | 46.9685    | 47.8726 | thiI; thiamine biosynthesis protein ThiI                         |                         |    |    |   |   |   |   |
|          |                        |                      |         |         | 28.500  | 55.000 | 40.6750    | 55.0000 |                                                                  |                         |    |    |   |   |   |   |
| SGO_0817 |                        | 3.556                |         |         |         | 6.500  |            | 6.7646  | hypothetical protein SGO_0817                                    |                         |    |    |   |   |   |   |
|          |                        |                      |         |         |         | 5.000  |            | 5.0000  |                                                                  |                         |    |    |   |   |   |   |
| SGO_0818 | 2.010                  | 9.582                | 0.0005  | 0.0006  | 190.500 | 87.000 | 284.0477   | 90.5417 | rplU; ribosomal protein L21                                      |                         |    |    |   |   |   |   |
|          |                        |                      |         |         | 230.000 | 63.500 | 328.2545   | 63.5000 |                                                                  |                         |    |    |   |   |   |   |
| SGO_0820 | 0.025                  | 7.846                | 0.1704  | 0.8971  | 35.000  | 72.500 | 52.1872    | 75.4514 | rpmA; ribosomal protein L27                                      |                         |    |    |   |   |   |   |
|          |                        |                      |         |         | 43.000  | 41.000 | 61.3693    | 41.0000 |                                                                  |                         |    |    |   |   |   |   |
| SGO_0822 |                        | 3.621                |         |         |         | 7.500  |            | 7.8053  | lipoprotein, putative                                            |                         |    |    |   |   |   |   |
|          |                        |                      |         |         |         | 4.500  |            | 4.5000  |                                                                  |                         |    |    |   |   |   |   |

- Show detected proteins only  
 Show all proteins

Proteins found:  
1179

Filter by category:

ABC Transporter

Test

Cutoff

q-Value

.005

p-Value

|             | Signif | Direction | Applies To   |
|-------------|--------|-----------|--------------|
| Red         | yes    | +         | ratios, bars |
| Yellow      | no     | n/a       | bars         |
| Green       | yes    | -         | ratios, bars |
| Pink        | yes    | +         | p-, q-Values |
| Light Green | yes    | -         | p-, q-Values |

Dot Plots Dot Plots

Summary Table

SgFn vs Sg

SgPg vs Sg

SgPgFn vs Sg

SgPg vs SgFn

SgPgFn vs SgFn

SgPgFn vs SgPg

Coverage

SgPg vs Sg

Raw

Normalized

Log<sub>2</sub> Ratios

| Protein  | SgPg vs Sg             |                      |         |         | Raw     |        | Normalized |          | Description                       | Log <sub>2</sub> Ratios |    |    |   |   |   |   |
|----------|------------------------|----------------------|---------|---------|---------|--------|------------|----------|-----------------------------------|-------------------------|----|----|---|---|---|---|
|          | Log <sub>2</sub> Ratio | Log <sub>2</sub> Sum | q-Value | p-Value | SgPg    | Sg     | SgPg       | Sg       |                                   | -6                      | -4 | -2 | 0 | 2 | 4 | 6 |
| SGO_0823 | -0.165                 | 2.920                |         |         | 2.500   | 4.000  | 3.5680     | 4.0000   | Cof family protein                |                         |    |    |   |   |   |   |
| SGO_0824 | 1.254                  | 7.781                | 0.0010  | 0.0017  | 51.500  | 25.000 | 76.7898    | 26.0177  | lepA; GTP-binding protein LepA    |                         |    |    |   |   |   |   |
| SGO_0825 | -1.794                 | 6.419                | 0.0019  | 0.0042  | 6.500   | 27.000 | 9.6919     | 28.0992  | lipoprotein, putative             |                         |    |    |   |   |   |   |
| SGO_0830 | 0.755                  | 2.710                | 0.0282  | 0.1150  | 2.000   | 1.500  | 2.9821     | 1.5611   | uvrC; excinuclease ABC, C subunit |                         |    |    |   |   |   |   |
| SGO_0832 | -2.252                 | 6.649                | 0.0010  | 0.0016  | 7.000   | 44.500 | 10.4374    | 46.3116  | hypothetical protein SGO_0832     |                         |    |    |   |   |   |   |
| SGO_0833 |                        | 3.120                |         |         | 2.000   |        | 2.9821     |          | phosphoesterase-related gene      |                         |    |    |   |   |   |   |
| SGO_0834 |                        | 4.377                |         |         |         | 7.000  |            | 7.2850   | hypothetical protein SGO_0834     |                         |    |    |   |   |   |   |
| SGO_0835 | 1.275                  | 8.064                | 0.0004  | 0.0004  | 63.500  | 32.500 | 94.6826    | 33.8231  | nitroreductase                    |                         |    |    |   |   |   |   |
| SGO_0836 | 0.793                  | 9.237                | 0.0004  | 0.0004  | 130.000 | 99.000 | 193.8383   | 103.0303 | pepV; dipeptidase PepV            |                         |    |    |   |   |   |   |
| SGO_0841 |                        | 1.807                |         |         |         | 3.500  |            | 3.5000   | oxidoreductase                    |                         |    |    |   |   |   |   |
| SGO_0842 | 0.073                  | 4.710                | 0.1825  | 0.9811  | 3.000   | 3.500  | 4.4732     | 3.6425   | rhodanese family protein          |                         |    |    |   |   |   |   |
| SGO_0848 | 1.269                  | 8.420                | 0.0000  | 0.0000  | 82.000  | 48.500 | 122.2672   | 50.4744  | rpmE; ribosomal protein L31       |                         |    |    |   |   |   |   |

- Show detected proteins only  
 Show all proteins

Proteins found:  
1179

Filter by category:

ABC Transporter

Test

Cutoff

q-Value

.005

p-Value

|             | Signif | Direction | Applies To   |
|-------------|--------|-----------|--------------|
| Red         | yes    | +         | ratios, bars |
| Yellow      | no     | n/a       | bars         |
| Green       | yes    | -         | ratios, bars |
| Pink        | yes    | +         | p-, q-Values |
| Light Green | yes    | -         | p-, q-Values |

Dot Plots Dot Plots



Summary Table

SgFn vs Sg

SgPg vs Sg

SgPgFn vs Sg

SgPg vs SgFn

SgPgFn vs SgFn

SgPgFn vs SgPg

Coverage

SgPg vs Sg

Raw

Normalized

Log<sub>2</sub> Ratios

| Protein  | SgPg vs Sg             |                      |         |         | Raw     |         | Normalized |          | Description                                       | Log <sub>2</sub> Ratios |    |    |   |   |   |   |
|----------|------------------------|----------------------|---------|---------|---------|---------|------------|----------|---------------------------------------------------|-------------------------|----|----|---|---|---|---|
|          | Log <sub>2</sub> Ratio | Log <sub>2</sub> Sum | q-Value | p-Value | SgPg    | Sg      | SgPg       | Sg       |                                                   | -6                      | -4 | -2 | 0 | 2 | 4 | 6 |
| SGO_0849 | 0.055                  | 6.011                | 0.1464  | 0.7609  | 13.000  | 13.000  | 19.3838    | 13.5292  | DHH subfamily 1 protein                           |                         |    |    |   |   |   |   |
|          |                        |                      |         |         | 9.500   | 18.000  | 13.5583    | 18.0000  |                                                   |                         |    |    |   |   |   |   |
| SGO_0850 | 1.562                  | 7.506                | 0.0004  | 0.0004  | 48.500  | 22.500  | 72.3166    | 23.4160  | flavodoxin                                        |                         |    |    |   |   |   |   |
|          |                        |                      |         |         | 44.500  | 22.500  | 63.5101    | 22.5000  |                                                   |                         |    |    |   |   |   |   |
| SGO_0851 | 0.281                  | 4.984                | 0.1267  | 0.6444  | 5.000   | 10.000  | 7.4553     | 10.4071  | putative permease                                 |                         |    |    |   |   |   |   |
|          |                        |                      |         |         | 6.500   | 4.500   | 9.2768     | 4.5000   |                                                   |                         |    |    |   |   |   |   |
| SGO_0852 | -0.862                 | 4.813                | 0.0092  | 0.0300  | 4.500   | 8.000   | 6.7098     | 8.3257   | TPR domain protein                                |                         |    |    |   |   |   |   |
|          |                        |                      |         |         | 2.500   | 9.500   | 3.5680     | 9.5000   |                                                   |                         |    |    |   |   |   |   |
| SGO_0853 | -0.638                 | 4.965                | 0.0412  | 0.1775  | 4.500   | 13.000  | 6.7098     | 13.5292  | budA; alpha-acetolactate decarboxylase            |                         |    |    |   |   |   |   |
|          |                        |                      |         |         | 3.500   | 6.000   | 4.9952     | 6.0000   |                                                   |                         |    |    |   |   |   |   |
| SGO_0854 | -5.332                 | 9.527                | 0.0001  | 0.0000  | 5.000   | 336.500 | 7.4553     | 350.1988 | cshA; surface-associated protein CshA             |                         |    |    |   |   |   |   |
|          |                        |                      |         |         | 7.500   | 369.500 | 10.7040    | 369.5000 |                                                   |                         |    |    |   |   |   |   |
| SGO_0855 | -0.453                 | 5.699                | 0.0089  | 0.0287  | 8.000   | 13.000  | 11.9285    | 13.5292  | fbpA; fibronectin-binding protein A               |                         |    |    |   |   |   |   |
|          |                        |                      |         |         | 7.000   | 16.500  | 9.9904     | 16.5000  |                                                   |                         |    |    |   |   |   |   |
| SGO_0856 | -1.459                 | 8.517                | 0.0003  | 0.0003  | 29.000  | 124.500 | 43.2408    | 129.5683 | ABC transporter, substrate binding protein        |                         |    |    |   |   |   |   |
|          |                        |                      |         |         | 38.500  | 138.500 | 54.9469    | 138.5000 |                                                   |                         |    |    |   |   |   |   |
| SGO_0858 |                        | 3.727                |         |         |         | 6.000   |            | 6.2443   | ABC transporter, ATP-binding protein              |                         |    |    |   |   |   |   |
|          |                        |                      |         |         |         | 7.000   |            | 7.0000   |                                                   |                         |    |    |   |   |   |   |
| SGO_0859 | -0.216                 | 7.523                | 0.0440  | 0.1920  | 30.000  | 54.500  | 44.7319    | 56.7187  | pheS; phenylalanyl-tRNA synthetase, alpha subunit |                         |    |    |   |   |   |   |
|          |                        |                      |         |         | 28.000  | 42.500  | 39.9614    | 42.5000  |                                                   |                         |    |    |   |   |   |   |
| SGO_0861 | 0.743                  | 8.986                | 0.0008  | 0.0012  | 103.500 | 99.000  | 154.3251   | 103.0303 | pheT; phenylalanyl-tRNA synthetase, beta subunit  |                         |    |    |   |   |   |   |
|          |                        |                      |         |         | 114.000 | 87.000  | 162.7000   | 87.0000  |                                                   |                         |    |    |   |   |   |   |
| SGO_0862 |                        | 3.475                |         |         |         | 3.000   |            | 3.1221   | hypothetical protein SGO_0862                     |                         |    |    |   |   |   |   |
|          |                        |                      |         |         |         | 8.000   |            | 8.0000   |                                                   |                         |    |    |   |   |   |   |

- Show detected proteins only
- Show all proteins

Proteins found: 1179

Filter by category:

ABC Transporter

Test

Cutoff

q-Value

.005

p-Value

|             | Signif | Direction | Applies To   |
|-------------|--------|-----------|--------------|
| Red         | yes    | +         | ratios, bars |
| Yellow      | no     | n/a       | bars         |
| Green       | yes    | -         | ratios, bars |
| Pink        | yes    | +         | p-, q-Values |
| Light Green | yes    | -         | p-, q-Values |

Dot Plots Dot Plots

Summary Table

SgFn vs Sg

SgPg vs Sg

SgPgFn vs Sg

SgPg vs SgFn

SgPgFn vs SgFn

SgPgFn vs SgPg

Coverage

SgPg vs Sg

Raw

Normalized

Log<sub>2</sub> Ratios

| Protein  | SgPg vs Sg             |                      |         |         | Raw    |         | Normalized |          | Description                                              | Log <sub>2</sub> Ratios |    |    |   |   |   |   |
|----------|------------------------|----------------------|---------|---------|--------|---------|------------|----------|----------------------------------------------------------|-------------------------|----|----|---|---|---|---|
|          | Log <sub>2</sub> Ratio | Log <sub>2</sub> Sum | q-Value | p-Value | SgPg   | Sg      | SgPg       | Sg       |                                                          | -6                      | -4 | -2 | 0 | 2 | 4 | 6 |
| SGO_0868 |                        | 1.058                |         |         |        | 2.000   |            | 2.0814   | hypothetical protein SGO_0868                            |                         |    |    |   |   |   |   |
| SGO_0877 |                        | 1.585                |         |         |        |         |            |          | permease domain protein                                  |                         |    |    |   |   |   |   |
| SGO_0885 | -0.639                 | 5.374                | 0.0115  | 0.0390  | 5.500  | 10.000  | 8.2009     | 10.4071  | cobyrinic acid synthase                                  |                         |    |    |   |   |   |   |
|          |                        |                      |         |         | 5.500  | 15.000  | 7.8496     | 15.0000  |                                                          |                         |    |    |   |   |   |   |
| SGO_0886 | -0.777                 | 4.851                | 0.0434  | 0.1880  | 2.500  | 5.000   | 3.7277     | 5.2035   | Mur ligase family protein                                |                         |    |    |   |   |   |   |
|          |                        |                      |         |         | 4.500  | 13.500  | 6.4224     | 13.5000  |                                                          |                         |    |    |   |   |   |   |
| SGO_0887 |                        | 7.303                |         |         |        | 84.000  |            | 87.4196  | conserved hypothetical protein TIGR00159                 |                         |    |    |   |   |   |   |
|          |                        |                      |         |         |        | 70.500  |            | 70.5000  |                                                          |                         |    |    |   |   |   |   |
| SGO_0888 | -1.894                 | 5.554                | 0.0025  | 0.0055  | 2.500  | 20.500  | 3.7277     | 21.3345  | hypothetical protein SGO_0888                            |                         |    |    |   |   |   |   |
|          |                        |                      |         |         | 4.500  | 15.500  | 6.4224     | 15.5000  |                                                          |                         |    |    |   |   |   |   |
| SGO_0889 | 0.013                  | 7.195                | 0.1403  | 0.7211  | 24.000 | 36.000  | 35.7855    | 37.4655  | glmM; phosphoglucosamine mutase                          |                         |    |    |   |   |   |   |
|          |                        |                      |         |         | 26.500 | 35.500  | 37.8206    | 35.5000  |                                                          |                         |    |    |   |   |   |   |
| SGO_0890 |                        | 8.059                |         |         |        | 126.000 |            | 131.1294 | LPXTG cell wall surface protein, collagen binding domain |                         |    |    |   |   |   |   |
|          |                        |                      |         |         |        | 135.500 |            | 135.5000 |                                                          |                         |    |    |   |   |   |   |
| SGO_0893 | 0.666                  | 7.769                | 0.0040  | 0.0106  | 40.500 | 44.000  | 60.3881    | 45.7912  | GTP-binding protein                                      |                         |    |    |   |   |   |   |
|          |                        |                      |         |         | 51.500 | 38.500  | 73.5005    | 38.5000  |                                                          |                         |    |    |   |   |   |   |
| SGO_0899 |                        | 3.334                |         |         |        | 2.000   |            | 2.0814   | putative hydrolase or acyltransferase                    |                         |    |    |   |   |   |   |
|          |                        |                      |         |         |        | 8.000   |            | 8.0000   |                                                          |                         |    |    |   |   |   |   |
| SGO_0901 | 0.470                  | 6.395                | 0.0052  | 0.0150  | 18.000 | 17.000  | 26.8391    | 17.6921  | DNA-directed DNA polymerase III                          |                         |    |    |   |   |   |   |
|          |                        |                      |         |         | 15.500 | 17.500  | 22.1215    | 17.5000  |                                                          |                         |    |    |   |   |   |   |
| SGO_0904 |                        | 1.058                |         |         |        | 2.000   |            | 2.0814   | purR; galactose operon repressor GalR                    |                         |    |    |   |   |   |   |
|          |                        |                      |         |         |        |         |            |          |                                                          |                         |    |    |   |   |   |   |

- Show detected proteins only  
 Show all proteins

Proteins found:  
1179

Filter by category:

ABC Transporter

Test

Cutoff

q-Value

.005

p-Value

|             | Signif | Direction | Applies To   |
|-------------|--------|-----------|--------------|
| Red         | yes    | +         | ratios, bars |
| Yellow      | no     | n/a       | bars         |
| Green       | yes    | -         | ratios, bars |
| Pink        | yes    | +         | p-, q-Values |
| Light Green | yes    | -         | p-, q-Values |

Dot Plots Dot Plots

Summary Table

SgFn vs Sg

SgPg vs Sg

SgPgFn vs Sg

SgPg vs SgFn

SgPgFn vs SgFn

SgPgFn vs SgPg

Coverage

SgPg vs Sg

Raw

Normalized

Log<sub>2</sub> Ratios

| Protein  | SgPg vs Sg             |                      |         |         | Raw    |        | Normalized |         | Description                                        | Log <sub>2</sub> Ratios |    |    |   |   |   |   |
|----------|------------------------|----------------------|---------|---------|--------|--------|------------|---------|----------------------------------------------------|-------------------------|----|----|---|---|---|---|
|          | Log <sub>2</sub> Ratio | Log <sub>2</sub> Sum | q-Value | p-Value | SgPg   | Sg     | SgPg       | Sg      |                                                    | -6                      | -4 | -2 | 0 | 2 | 4 | 6 |
| SGO_0905 |                        | 4.857                |         |         |        | 12.000 |            | 12.4885 | lipoprotein, putative                              |                         |    |    |   |   |   |   |
|          |                        |                      |         |         |        | 16.500 |            | 16.5000 |                                                    |                         |    |    |   |   |   |   |
| SGO_0906 | 1.999                  | 6.978                | 0.0001  | 0.0000  | 34.000 | 10.500 | 50.6962    | 10.9275 | leuA; 2-isopropylmalate synthase                   |                         |    |    |   |   |   |   |
|          |                        |                      |         |         | 35.000 | 14.500 | 49.9518    | 14.5000 |                                                    |                         |    |    |   |   |   |   |
| SGO_0907 | 0.546                  | 3.597                | 0.0772  | 0.3701  |        | 2.500  |            | 2.6018  | leuB; 3-isopropylmalate dehydrogenase              |                         |    |    |   |   |   |   |
|          |                        |                      |         |         | 3.500  | 4.500  | 4.9952     | 4.5000  |                                                    |                         |    |    |   |   |   |   |
| SGO_0909 |                        | 2.683                |         |         |        |        |            |         | leuC; 3-isopropylmalate dehydratase, large subunit |                         |    |    |   |   |   |   |
|          |                        |                      |         |         | 4.500  |        | 6.4224     |         |                                                    |                         |    |    |   |   |   |   |
| SGO_0911 | 1.860                  | 8.180                | 0.0001  | 0.0000  | 75.000 | 29.000 | 111.8298   | 30.1806 | hypothetical protein SGO_0911                      |                         |    |    |   |   |   |   |
|          |                        |                      |         |         | 81.000 | 32.500 | 115.6027   | 32.5000 |                                                    |                         |    |    |   |   |   |   |
| SGO_0915 | -1.047                 | 5.481                | 0.0012  | 0.0021  | 5.500  | 13.500 | 8.2009     | 14.0496 | proV; ABC-type proline/glycine betaine transporter |                         |    |    |   |   |   |   |
|          |                        |                      |         |         | 4.500  | 16.000 | 6.4224     | 16.0000 |                                                    |                         |    |    |   |   |   |   |
| SGO_0916 |                        | 5.255                |         |         |        | 17.000 |            | 17.6921 | proWX; ABC transporter membrane-spanning permease  |                         |    |    |   |   |   |   |
|          |                        |                      |         |         |        | 20.500 |            | 20.5000 |                                                    |                         |    |    |   |   |   |   |
| SGO_0932 |                        | 2.845                |         |         |        | 4.500  |            | 4.6832  | galK; galactokinase                                |                         |    |    |   |   |   |   |
|          |                        |                      |         |         |        | 2.500  |            | 2.5000  |                                                    |                         |    |    |   |   |   |   |
| SGO_0934 |                        | 2.459                |         |         |        |        |            |         | galE-2; UDP-glucose 4-epimerase                    |                         |    |    |   |   |   |   |
|          |                        |                      |         |         |        | 5.500  |            | 5.5000  |                                                    |                         |    |    |   |   |   |   |
| SGO_0936 |                        | 2.036                |         |         |        | 2.500  |            | 2.6018  | phosphoenolpyruvate synthase, putative             |                         |    |    |   |   |   |   |
|          |                        |                      |         |         |        | 1.500  |            | 1.5000  |                                                    |                         |    |    |   |   |   |   |
| SGO_0938 |                        |                      |         |         |        |        |            |         | Phosphatidylserine decarboxylase proenzyme 2       |                         |    |    |   |   |   |   |
|          |                        |                      |         |         |        |        |            |         |                                                    |                         |    |    |   |   |   |   |
| SGO_0940 |                        | 3.894                |         |         |        | 9.000  |            | 9.3664  | ppsA; phosphoenolpyruvate synthase                 |                         |    |    |   |   |   |   |
|          |                        |                      |         |         |        | 5.500  |            | 5.5000  |                                                    |                         |    |    |   |   |   |   |

- Show detected proteins only  
 Show all proteins

Proteins found:  
1179

Filter by category:

ABC Transporter

Test

Cutoff

q-Value

.005

p-Value

|             | Signif | Direction | Applies To   |
|-------------|--------|-----------|--------------|
| Red         | yes    | +         | ratios, bars |
| Yellow      | no     | n/a       | bars         |
| Green       | yes    | -         | ratios, bars |
| Pink        | yes    | +         | p-, q-Values |
| Light Green | yes    | -         | p-, q-Values |

Dot Plots Dot Plots

Summary Table

SgFn vs Sg

SgPg vs Sg

SgPgFn vs Sg

SgPg vs SgFn

SgPgFn vs SgFn

SgPgFn vs SgPg

Coverage

SgPg vs Sg

Raw

Normalized

Log<sub>2</sub> Ratios

| Protein  | SgPg vs Sg             |                      |         |         | Raw    |        | Normalized |         | Description                                           | Log <sub>2</sub> Ratios |    |    |   |   |   |   |
|----------|------------------------|----------------------|---------|---------|--------|--------|------------|---------|-------------------------------------------------------|-------------------------|----|----|---|---|---|---|
|          | Log <sub>2</sub> Ratio | Log <sub>2</sub> Sum | q-Value | p-Value | SgPg   | Sg     | SgPg       | Sg      |                                                       | -6                      | -4 | -2 | 0 | 2 | 4 | 6 |
| SGO_0941 |                        | 1.322                |         |         |        |        |            |         | hypothetical protein SGO_0941                         |                         |    |    |   |   |   |   |
|          |                        |                      |         |         |        | 2.500  |            | 2.5000  |                                                       |                         |    |    |   |   |   |   |
| SGO_0942 |                        | 5.201                |         |         |        | 19.500 |            | 20.2938 | zmpC; zinc metalloproteinase C                        |                         |    |    |   |   |   |   |
|          |                        |                      |         |         |        | 16.500 |            | 16.5000 |                                                       |                         |    |    |   |   |   |   |
| SGO_0944 |                        | 5.012                |         |         |        | 6.500  |            | 6.7646  | ABC transporter, ATP-binding protein                  |                         |    |    |   |   |   |   |
|          |                        |                      |         |         |        | 25.500 |            | 25.5000 |                                                       |                         |    |    |   |   |   |   |
| SGO_0946 | -0.217                 | 6.786                | 0.0285  | 0.1162  | 19.000 | 30.000 | 28.3302    | 31.2213 | Deblocking aminopeptidase                             |                         |    |    |   |   |   |   |
|          |                        |                      |         |         | 16.000 | 28.000 | 22.8351    | 28.0000 |                                                       |                         |    |    |   |   |   |   |
| SGO_0948 |                        | 5.141                |         |         |        | 19.000 |            | 19.7735 | pgdA; peptidoglycan N-acetylglucosamine deacetylase A |                         |    |    |   |   |   |   |
|          |                        |                      |         |         |        | 15.500 |            | 15.5000 |                                                       |                         |    |    |   |   |   |   |
| SGO_0949 | -0.476                 | 5.268                | 0.0151  | 0.0552  | 5.000  | 12.500 | 7.4553     | 13.0089 | deaD; DEAD RNA helicase                               |                         |    |    |   |   |   |   |
|          |                        |                      |         |         | 6.000  | 9.500  | 8.5632     | 9.5000  |                                                       |                         |    |    |   |   |   |   |
| SGO_0950 | -0.275                 | 4.609                | 0.1251  | 0.6319  | 6.500  |        | 9.6919     |         | oxidoreductase                                        |                         |    |    |   |   |   |   |
|          |                        |                      |         |         | 4.000  | 9.000  | 5.7088     | 9.0000  |                                                       |                         |    |    |   |   |   |   |
| SGO_0951 | -0.138                 | 5.905                | 0.0714  | 0.3362  | 9.000  | 13.000 | 13.4196    | 13.5292 | udk; uridine kinase                                   |                         |    |    |   |   |   |   |
|          |                        |                      |         |         | 10.500 | 18.000 | 14.9855    | 18.0000 |                                                       |                         |    |    |   |   |   |   |
| SGO_0953 |                        | 5.155                |         |         | 10.500 |        | 15.6562    |         | endoribonuclease L-PSP, putative                      |                         |    |    |   |   |   |   |
|          |                        |                      |         |         | 14.000 |        | 19.9807    |         |                                                       |                         |    |    |   |   |   |   |
| SGO_0954 | 0.095                  | 6.263                | 0.1169  | 0.5847  | 9.500  | 18.000 | 14.1651    | 18.7328 | ATP-binding protein                                   |                         |    |    |   |   |   |   |
|          |                        |                      |         |         | 18.500 | 17.500 | 26.4031    | 17.5000 |                                                       |                         |    |    |   |   |   |   |
| SGO_0955 | 0.411                  | 4.555                | 0.0759  | 0.3630  |        | 5.500  |            | 5.7239  | transporter                                           |                         |    |    |   |   |   |   |
|          |                        |                      |         |         | 6.500  | 8.500  | 9.2768     | 8.5000  |                                                       |                         |    |    |   |   |   |   |
| SGO_0957 |                        | 5.518                |         |         |        | 20.500 |            | 21.3345 | hypothetical protein SGO_0957                         |                         |    |    |   |   |   |   |
|          |                        |                      |         |         |        | 24.500 |            | 24.5000 |                                                       |                         |    |    |   |   |   |   |

 Show detected proteins only Show all proteinsProteins found:  
1179 Filter by category:

ABC Transporter

Test

Cutoff

q-Value

.005

p-Value

|             | Signif | Direction | Applies To   |
|-------------|--------|-----------|--------------|
| Red         | yes    | +         | ratios, bars |
| Yellow      | no     | n/a       | bars         |
| Green       | yes    | -         | ratios, bars |
| Pink        | yes    | +         | p-, q-Values |
| Light Green | yes    | -         | p-, q-Values |

Dot Plots Dot Plots

Summary Table SgFn vs Sg SgPg vs Sg SgPgFn vs Sg SgPg vs SgFn SgPgFn vs SgFn SgPgFn vs SgPg Coverage

| Protein  | SgPg vs Sg             |                      |         |         | Raw    |         | Normalized |          | Description                                            | Log <sub>2</sub> Ratios |    |    |   |   |   |   |
|----------|------------------------|----------------------|---------|---------|--------|---------|------------|----------|--------------------------------------------------------|-------------------------|----|----|---|---|---|---|
|          | Log <sub>2</sub> Ratio | Log <sub>2</sub> Sum | q-Value | p-Value | SgPg   | Sg      | SgPg       | Sg       |                                                        | -6                      | -4 | -2 | 0 | 2 | 4 | 6 |
| SGO_0959 | 0.527                  | 4.866                | 0.0492  | 0.2185  | 6.500  | 8.000   | 9.6919     | 8.3257   | copper homeostasis protein CutC                        |                         |    |    |   |   |   |   |
|          |                        |                      |         |         | 5.000  | 4.000   | 7.1360     | 4.0000   |                                                        |                         |    |    |   |   |   |   |
| SGO_0961 |                        | 3.776                |         |         |        | 5.000   |            | 5.2035   | ABC transporter, permease/ATP-binding protein          |                         |    |    |   |   |   |   |
|          |                        |                      |         |         |        | 8.500   |            | 8.5000   |                                                        |                         |    |    |   |   |   |   |
| SGO_0962 |                        | 1.841                |         |         |        | 2.000   |            | 2.0814   | ABC transporter, permease/ATP-binding protein          |                         |    |    |   |   |   |   |
|          |                        |                      |         |         |        | 1.500   |            | 1.5000   |                                                        |                         |    |    |   |   |   |   |
| SGO_0966 |                        | 6.093                |         |         |        | 31.000  |            | 32.2620  | hsa; streptococcal hemagglutinin                       |                         |    |    |   |   |   |   |
|          |                        |                      |         |         |        | 36.000  |            | 36.0000  |                                                        |                         |    |    |   |   |   |   |
| SGO_0969 |                        | 2.934                |         |         |        | 3.500   |            | 3.6425   | nss; nucleotide sugar synthetase-like protein          |                         |    |    |   |   |   |   |
|          |                        |                      |         |         |        | 4.000   |            | 4.0000   |                                                        |                         |    |    |   |   |   |   |
| SGO_0971 |                        | 2.609                |         |         |        | 2.500   |            | 2.6018   | asp1; accessory secretory protein                      |                         |    |    |   |   |   |   |
|          |                        |                      |         |         |        | 3.500   |            | 3.5000   |                                                        |                         |    |    |   |   |   |   |
| SGO_0972 |                        | 1.585                |         |         |        |         |            |          | asp2; accessory secretory protein                      |                         |    |    |   |   |   |   |
|          |                        |                      |         |         |        | 3.000   |            | 3.0000   |                                                        |                         |    |    |   |   |   |   |
| SGO_0975 |                        | 3.272                |         |         |        | 4.000   |            | 4.1628   | gtaA; glycosyl transferase, group 1 SP1758             |                         |    |    |   |   |   |   |
|          |                        |                      |         |         |        | 5.500   |            | 5.5000   |                                                        |                         |    |    |   |   |   |   |
| SGO_0979 |                        | 3.279                |         |         |        | 5.000   |            | 5.2035   | degV family protein                                    |                         |    |    |   |   |   |   |
|          |                        |                      |         |         |        | 4.500   |            | 4.5000   |                                                        |                         |    |    |   |   |   |   |
| SGO_0980 |                        | 0.643                |         |         |        | 1.500   |            | 1.5611   | transcriptional regulator, TetR family domain protein  |                         |    |    |   |   |   |   |
|          |                        |                      |         |         |        |         |            |          |                                                        |                         |    |    |   |   |   |   |
| SGO_0981 | -0.793                 | 4.371                | 0.0772  | 0.3697  | 3.000  | 5.500   | 4.4732     | 5.7239   | comE operon protein 2 family                           |                         |    |    |   |   |   |   |
|          |                        |                      |         |         |        | 10.500  |            | 10.5000  |                                                        |                         |    |    |   |   |   |   |
| SGO_0982 | -2.052                 | 8.392                | 0.0004  | 0.0003  | 19.500 | 121.500 | 29.0757    | 126.4462 | amino acid ABC transporter, amino acid-binding protein |                         |    |    |   |   |   |   |
|          |                        |                      |         |         | 25.500 | 144.000 | 36.3934    | 144.0000 |                                                        |                         |    |    |   |   |   |   |

- Show detected proteins only
- Show all proteins

Proteins found: 1179

Filter by category:  
ABC Transporter

Test

Cutoff

q-Value

.005

p-Value

|             | Signif | Direction | Applies To   |
|-------------|--------|-----------|--------------|
| Red         | yes    | +         | ratios, bars |
| Yellow      | no     | n/a       | bars         |
| Green       | yes    | -         | ratios, bars |
| Pink        | yes    | +         | p-, q-Values |
| Light Green | yes    | -         | p-, q-Values |

Dot Plots Dot Plots

Summary Table SgFn vs Sg SgPg vs Sg SgPgFn vs Sg SgPg vs SgFn SgPgFn vs SgFn SgPgFn vs SgPg Coverage

| Protein  | SgPg vs Sg             |                      |         |         | Raw     |         | Normalized |          | Description                                                | Log <sub>2</sub> Ratios |    |    |   |   |   |   |
|----------|------------------------|----------------------|---------|---------|---------|---------|------------|----------|------------------------------------------------------------|-------------------------|----|----|---|---|---|---|
|          | Log <sub>2</sub> Ratio | Log <sub>2</sub> Sum | q-Value | p-Value | SgPg    | Sg      | SgPg       | Sg       |                                                            | -6                      | -4 | -2 | 0 | 2 | 4 | 6 |
| SGO_0983 | -3.281                 | 5.868                | 0.0096  | 0.0314  |         | 25.500  |            | 26.5381  | amino acid ABC transporter, ATP-binding protein SP0709     |                         |    |    |   |   |   |   |
|          |                        |                      |         |         | 2.000   | 29.000  | 2.8544     | 29.0000  |                                                            |                         |    |    |   |   |   |   |
| SGO_0986 |                        | 3.992                |         |         |         | 10.000  |            | 10.4071  | hypothetical protein SGO_0986                              |                         |    |    |   |   |   |   |
|          |                        |                      |         |         |         | 5.500   |            | 5.5000   |                                                            |                         |    |    |   |   |   |   |
| SGO_0987 | 0.274                  | 7.714                | 0.0366  | 0.1563  | 32.500  | 48.000  | 48.4596    | 49.9541  | metK; S-adenosylmethionine synthetase                      |                         |    |    |   |   |   |   |
|          |                        |                      |         |         | 47.000  | 44.500  | 67.0781    | 44.5000  |                                                            |                         |    |    |   |   |   |   |
| SGO_0991 | 1.525                  | 8.820                |         |         |         | 112.000 |            | 116.5595 | hypothetical protein SGO_0991                              |                         |    |    |   |   |   |   |
|          |                        |                      |         |         | 235.000 |         | 335.3905   |          |                                                            |                         |    |    |   |   |   |   |
| SGO_0993 |                        | 2.098                |         |         |         |         |            |          | GTP-binding protein HflX                                   |                         |    |    |   |   |   |   |
|          |                        |                      |         |         | 3.000   |         | 4.2816     |          |                                                            |                         |    |    |   |   |   |   |
| SGO_0994 | 0.996                  | 4.243                | 0.0136  | 0.0479  | 3.500   | 2.000   | 5.2187     | 2.0814   | hypothetical protein SGO_0994                              |                         |    |    |   |   |   |   |
|          |                        |                      |         |         | 5.000   | 4.500   | 7.1360     | 4.5000   |                                                            |                         |    |    |   |   |   |   |
| SGO_0995 | 0.171                  | 5.395                | 0.1330  | 0.6801  | 11.500  | 5.500   | 17.1472    | 5.7239   | metallo-beta-lactamase superfamily protein                 |                         |    |    |   |   |   |   |
|          |                        |                      |         |         | 4.000   | 13.500  | 5.7088     | 13.5000  |                                                            |                         |    |    |   |   |   |   |
| SGO_0996 |                        | 3.351                |         |         |         | 5.000   |            | 5.2035   | oxidoreductase, short-chain dehydrogenase/reductase family |                         |    |    |   |   |   |   |
|          |                        |                      |         |         |         | 5.000   |            | 5.0000   |                                                            |                         |    |    |   |   |   |   |
| SGO_0997 | -1.025                 | 5.451                | 0.0317  | 0.1312  | 8.500   | 12.000  | 12.6740    | 12.4885  | hypothetical protein SGO_0997                              |                         |    |    |   |   |   |   |
|          |                        |                      |         |         | 2.500   | 15.000  | 3.5680     | 15.0000  |                                                            |                         |    |    |   |   |   |   |
| SGO_1000 | 1.958                  | 4.529                | 0.0329  | 0.1379  | 8.000   | 2.500   | 11.9285    | 2.6018   | recJ; single-stranded-DNA-specific exonuclease RecJ        |                         |    |    |   |   |   |   |
|          |                        |                      |         |         | 6.000   |         | 8.5632     |          |                                                            |                         |    |    |   |   |   |   |
| SGO_1001 | 1.111                  | 7.883                | 0.0025  | 0.0058  | 48.500  | 42.500  | 72.3166    | 44.2302  | apt; adenine phosphoribosyltransferase                     |                         |    |    |   |   |   |   |
|          |                        |                      |         |         | 62.000  | 31.000  | 88.4860    | 31.0000  |                                                            |                         |    |    |   |   |   |   |
| SGO_1002 |                        | 1.000                |         |         |         |         |            |          | metA; homoserine O-succinyltransferase                     |                         |    |    |   |   |   |   |
|          |                        |                      |         |         |         | 2.000   |            | 2.0000   |                                                            |                         |    |    |   |   |   |   |

Show detected proteins only  
 Show all proteins

Filter by category:

Proteins found:  
1179

Test Cutoff

| Signif | Direction | Applies To   |
|--------|-----------|--------------|
| yes    | +         | ratios, bars |
| no     | n/a       | bars         |
| yes    | -         | ratios, bars |
| yes    | +         | p-, q-Values |
| yes    | -         | p-, q-Values |

Dot Plots  Dot Plots

Summary Table

SgFn vs Sg

SgPg vs Sg

SgPgFn vs Sg

SgPg vs SgFn

SgPgFn vs SgFn

SgPgFn vs SgPg

Coverage

SgPg vs Sg

Raw

Normalized

Log<sub>2</sub> Ratios

| Protein  | SgPg vs Sg             |                      |         |         | Raw     |        | Normalized |         | Description                                          | Log <sub>2</sub> Ratios |    |    |   |   |   |   |
|----------|------------------------|----------------------|---------|---------|---------|--------|------------|---------|------------------------------------------------------|-------------------------|----|----|---|---|---|---|
|          | Log <sub>2</sub> Ratio | Log <sub>2</sub> Sum | q-Value | p-Value | SgPg    | Sg     | SgPg       | Sg      |                                                      | -6                      | -4 | -2 | 0 | 2 | 4 | 6 |
| SGO_1003 | 0.078                  | 5.464                | 0.1208  | 0.6096  | 8.500   | 11.500 | 12.6740    | 11.9682 | DNA replication protein DnaD                         |                         |    |    |   |   |   |   |
|          |                        |                      |         |         | 7.000   | 9.500  | 9.9904     | 9.5000  |                                                      |                         |    |    |   |   |   |   |
| SGO_1004 | 1.083                  | 4.433                | 0.0635  | 0.2929  | 7.500   |        | 11.1830    |         | glutathione S-transferase family protein             |                         |    |    |   |   |   |   |
|          |                        |                      |         |         | 4.500   | 4.000  | 6.4224     | 4.0000  |                                                      |                         |    |    |   |   |   |   |
| SGO_1005 | 0.994                  | 5.306                | 0.0039  | 0.0102  | 10.000  | 5.500  | 14.9106    | 5.7239  | Bcl-2 family protein                                 |                         |    |    |   |   |   |   |
|          |                        |                      |         |         | 8.000   | 7.500  | 11.4175    | 7.5000  |                                                      |                         |    |    |   |   |   |   |
| SGO_1006 | 0.787                  | 3.497                | 0.0576  | 0.2617  | 3.500   |        | 5.2187     |         | conserved hypothetical protein TIGR00486             |                         |    |    |   |   |   |   |
|          |                        |                      |         |         | 2.500   | 2.500  | 3.5680     | 2.5000  |                                                      |                         |    |    |   |   |   |   |
| SGO_1007 |                        | 2.854                |         |         | 1.500   |        | 2.2366     |         | oxidoreductase, DadA family protein SP1608           |                         |    |    |   |   |   |   |
|          |                        |                      |         |         | 3.500   |        | 4.9952     |         |                                                      |                         |    |    |   |   |   |   |
| SGO_1009 | 1.501                  | 8.934                | 0.0003  | 0.0002  | 126.500 | 57.000 | 188.6196   | 59.3204 | rfbA-1; glucose-1-phosphate thymidyltransferase      |                         |    |    |   |   |   |   |
|          |                        |                      |         |         | 121.000 | 68.500 | 172.6904   | 68.5000 |                                                      |                         |    |    |   |   |   |   |
| SGO_1010 | 0.919                  | 7.414                | 0.0033  | 0.0084  | 42.500  | 28.000 | 63.3702    | 29.1399 | rmlC; dTDP-4-keto-6-deoxyglucose-3,5-epimerase       |                         |    |    |   |   |   |   |
|          |                        |                      |         |         | 34.000  | 29.500 | 48.5246    | 29.5000 |                                                      |                         |    |    |   |   |   |   |
| SGO_1011 | 1.150                  | 8.223                | 0.0022  | 0.0049  | 73.000  | 35.000 | 108.8477   | 36.4248 | rfbB-1; dTDP-glucose 4,6-dehydratase                 |                         |    |    |   |   |   |   |
|          |                        |                      |         |         | 67.000  | 58.000 | 95.6220    | 58.0000 |                                                      |                         |    |    |   |   |   |   |
| SGO_1012 | 0.993                  | 8.779                | 0.0001  | 0.0000  | 98.500  | 72.000 | 146.8698   | 74.9311 | galE-1; UDP-glucose 4-epimerase                      |                         |    |    |   |   |   |   |
|          |                        |                      |         |         | 102.000 | 72.000 | 145.5737   | 72.0000 |                                                      |                         |    |    |   |   |   |   |
| SGO_1013 | -2.901                 | 6.102                | 0.0214  | 0.0839  |         | 34.500 |            | 35.9045 | Glycosyltransferase involved in cell wall biogenesis |                         |    |    |   |   |   |   |
|          |                        |                      |         |         | 3.000   | 28.500 | 4.2816     | 28.5000 |                                                      |                         |    |    |   |   |   |   |
| SGO_1016 | -1.298                 | 5.936                | 0.0047  | 0.0130  | 6.500   | 17.000 | 9.6919     | 17.6921 | putative glycosyltransferase                         |                         |    |    |   |   |   |   |
|          |                        |                      |         |         | 5.500   | 26.000 | 7.8496     | 26.0000 |                                                      |                         |    |    |   |   |   |   |
| SGO_1018 |                        | 3.669                |         |         |         | 5.500  |            | 5.7239  | hypothetical protein SGO_1018                        |                         |    |    |   |   |   |   |
|          |                        |                      |         |         |         | 7.000  |            | 7.0000  |                                                      |                         |    |    |   |   |   |   |

 Show detected proteins only Show all proteinsProteins found:  
1179 Filter by category:

ABC Transporter

Test

Cutoff

q-Value

.005

p-Value

|             | Signif | Direction | Applies To   |
|-------------|--------|-----------|--------------|
| Red         | yes    | +         | ratios, bars |
| Yellow      | no     | n/a       | bars         |
| Green       | yes    | -         | ratios, bars |
| Pink        | yes    | +         | p-, q-Values |
| Light Green | yes    | -         | p-, q-Values |

Dot Plots Dot Plots

Summary Table

SgFn vs Sg

SgPg vs Sg

SgPgFn vs Sg

SgPg vs SgFn

SgPgFn vs SgFn

SgPgFn vs SgPg

Coverage

| Protein  | SgPg vs Sg             |                      |         |         | Raw    |         | Normalized |          | Description                              | Log <sub>2</sub> Ratios |    |    |   |   |   |   |
|----------|------------------------|----------------------|---------|---------|--------|---------|------------|----------|------------------------------------------|-------------------------|----|----|---|---|---|---|
|          | Log <sub>2</sub> Ratio | Log <sub>2</sub> Sum | q-Value | p-Value | SgPg   | Sg      | SgPg       | Sg       |                                          | -6                      | -4 | -2 | 0 | 2 | 4 | 6 |
| SGO_1019 | -2.504                 | 6.579                | 0.0001  | 0.0000  | 4.000  | 39.500  | 5.9643     | 41.1080  | glycosyl transferase                     |                         |    |    |   |   |   |   |
|          |                        |                      |         |         | 6.000  | 40.000  | 8.5632     | 40.0000  |                                          |                         |    |    |   |   |   |   |
| SGO_1020 | 0.660                  | 7.639                | 0.0101  | 0.0334  | 34.000 | 37.500  | 50.6962    | 39.0266  | rfbD; dTDP-4-dehydrorhamnose reductase   |                         |    |    |   |   |   |   |
|          |                        |                      |         |         | 50.500 | 37.500  | 72.0733    | 37.5000  |                                          |                         |    |    |   |   |   |   |
| SGO_1021 |                        | 5.625                |         |         |        | 21.000  |            | 21.8549  | rgpA; rhamnosyltransferase, putative     |                         |    |    |   |   |   |   |
|          |                        |                      |         |         |        | 27.500  |            | 27.5000  |                                          |                         |    |    |   |   |   |   |
| SGO_1022 |                        | 5.593                |         |         |        | 18.500  |            | 19.2531  | rhamnosyltransferase                     |                         |    |    |   |   |   |   |
|          |                        |                      |         |         |        | 29.000  |            | 29.0000  |                                          |                         |    |    |   |   |   |   |
| SGO_1024 | -0.897                 | 6.994                | 0.0133  | 0.0467  | 18.500 | 31.500  | 27.5847    | 32.7824  | putative polysaccharide ABC transporter  |                         |    |    |   |   |   |   |
|          |                        |                      |         |         | 12.000 | 50.000  | 17.1263    | 50.0000  |                                          |                         |    |    |   |   |   |   |
| SGO_1025 | -0.018                 | 6.700                | 0.1714  | 0.9072  | 15.000 | 21.500  | 22.3660    | 22.3753  | rgp; glycosyltransferase                 |                         |    |    |   |   |   |   |
|          |                        |                      |         |         | 20.500 | 30.000  | 29.2575    | 30.0000  |                                          |                         |    |    |   |   |   |   |
| SGO_1026 | -2.178                 | 8.025                | 0.0046  | 0.0126  | 15.000 | 77.000  | 22.3660    | 80.1346  | rhamnosyltransferase                     |                         |    |    |   |   |   |   |
|          |                        |                      |         |         | 16.500 | 134.500 | 23.5487    | 134.5000 |                                          |                         |    |    |   |   |   |   |
| SGO_1027 |                        | 5.739                |         |         |        | 22.500  |            | 23.4160  | hypothetical protein SGO_1027            |                         |    |    |   |   |   |   |
|          |                        |                      |         |         |        | 30.000  |            | 30.0000  |                                          |                         |    |    |   |   |   |   |
| SGO_1028 |                        | 4.110                |         |         |        | 6.500   |            | 6.7646   | hypothetical protein SGO_1028            |                         |    |    |   |   |   |   |
|          |                        |                      |         |         |        | 10.500  |            | 10.5000  |                                          |                         |    |    |   |   |   |   |
| SGO_1030 |                        | 4.129                |         |         |        |         |            |          | hypothetical protein SGO_1030            |                         |    |    |   |   |   |   |
|          |                        |                      |         |         |        | 17.500  |            | 17.5000  |                                          |                         |    |    |   |   |   |   |
| SGO_1031 | -0.051                 | 5.735                | 0.1206  | 0.6069  | 8.000  | 13.500  | 11.9285    | 14.0496  | cmk; cytidylate kinase                   |                         |    |    |   |   |   |   |
|          |                        |                      |         |         | 10.000 | 13.000  | 14.2719    | 13.0000  |                                          |                         |    |    |   |   |   |   |
| SGO_1032 | -0.408                 | 5.564                | 0.0853  | 0.4151  | 10.000 | 12.000  | 14.9106    | 12.4885  | infC; translation initiation factor IF-3 |                         |    |    |   |   |   |   |
|          |                        |                      |         |         | 4.500  | 13.500  | 6.4224     | 13.5000  |                                          |                         |    |    |   |   |   |   |

- Show detected proteins only
- Show all proteins

Proteins found:  
1179

Filter by category:

ABC Transporter

Test

Cutoff

q-Value

.005

p-Value

|  | Signif | Direction | Applies To   |
|--|--------|-----------|--------------|
|  | yes    | +         | ratios, bars |
|  | no     | n/a       | bars         |
|  | yes    | -         | ratios, bars |
|  | yes    | +         | p-, q-Values |
|  | yes    | -         | p-, q-Values |

Dot Plots



Summary Table

SgFn vs Sg

SgPg vs Sg

SgPgFn vs Sg

SgPg vs SgFn

SgPgFn vs SgFn

SgPgFn vs SgPg

Coverage

| Protein  | SgPg vs Sg             |                      |         |         | Raw     |         | Normalized |          | Description                                                      | Log <sub>2</sub> Ratios |    |    |   |   |   |   |
|----------|------------------------|----------------------|---------|---------|---------|---------|------------|----------|------------------------------------------------------------------|-------------------------|----|----|---|---|---|---|
|          | Log <sub>2</sub> Ratio | Log <sub>2</sub> Sum | q-Value | p-Value | SgPg    | Sg      | SgPg       | Sg       |                                                                  | -6                      | -4 | -2 | 0 | 2 | 4 | 6 |
| SGO_1033 |                        | 6.858                |         |         |         | 36.000  |            | 37.4655  | rpmI; ribosomal protein L35                                      |                         |    |    |   |   |   |   |
|          |                        |                      |         |         |         | 78.500  |            | 78.5000  |                                                                  |                         |    |    |   |   |   |   |
| SGO_1034 | 1.019                  | 9.964                | 0.0000  | 0.0000  | 222.000 | 158.000 | 331.0162   | 164.4321 | rplT; ribosomal protein L20                                      |                         |    |    |   |   |   |   |
|          |                        |                      |         |         | 236.500 | 165.500 | 337.5312   | 165.5000 |                                                                  |                         |    |    |   |   |   |   |
| SGO_1035 | 0.688                  | 5.690                | 0.0127  | 0.0439  | 10.500  | 7.000   | 15.6562    | 7.2850   | gloA; lactoylglutathione lyase                                   |                         |    |    |   |   |   |   |
|          |                        |                      |         |         | 11.000  | 13.000  | 15.6991    | 13.0000  |                                                                  |                         |    |    |   |   |   |   |
| SGO_1036 | -1.212                 | 6.966                | 0.0083  | 0.0259  | 8.500   | 34.500  | 12.6740    | 35.9045  | amino acid ABC transporter, ATP-binding protein SP1242           |                         |    |    |   |   |   |   |
|          |                        |                      |         |         | 18.500  | 50.000  | 26.4031    | 50.0000  |                                                                  |                         |    |    |   |   |   |   |
| SGO_1037 | -0.955                 | 6.229                | 0.0002  | 0.0001  | 9.000   | 23.500  | 13.4196    | 24.4567  | glutamine ABC transporter permease and substrate binding protein |                         |    |    |   |   |   |   |
|          |                        |                      |         |         | 8.500   | 25.000  | 12.1311    | 25.0000  |                                                                  |                         |    |    |   |   |   |   |
| SGO_1038 | 0.889                  | 5.145                | 0.0229  | 0.0908  | 9.500   | 4.000   | 14.1651    | 4.1628   | uvrB; excinuclease ABC, B subunit                                |                         |    |    |   |   |   |   |
|          |                        |                      |         |         | 6.000   | 8.500   | 8.5632     | 8.5000   |                                                                  |                         |    |    |   |   |   |   |
| SGO_1039 |                        | 3.272                |         |         |         | 4.000   |            | 4.1628   | hypothetical protein SGO_1039                                    |                         |    |    |   |   |   |   |
|          |                        |                      |         |         |         | 5.500   |            | 5.5000   |                                                                  |                         |    |    |   |   |   |   |
| SGO_1041 | 0.719                  | 4.572                | 0.0490  | 0.2172  | 7.000   |         | 10.4374    |          | hypothetical protein SGO_1041                                    |                         |    |    |   |   |   |   |
|          |                        |                      |         |         | 5.500   | 5.500   | 7.8496     | 5.5000   |                                                                  |                         |    |    |   |   |   |   |
| SGO_1044 | 2.045                  | 3.796                | 0.0095  | 0.0310  | 4.000   |         | 5.9643     |          | MutT/nudix family protein                                        |                         |    |    |   |   |   |   |
|          |                        |                      |         |         | 4.500   | 1.500   | 6.4224     | 1.5000   |                                                                  |                         |    |    |   |   |   |   |
| SGO_1047 | 0.514                  | 6.503                | 0.0197  | 0.0765  | 15.500  | 14.500  | 23.1115    | 15.0903  | hypothetical protein SGO_1047                                    |                         |    |    |   |   |   |   |
|          |                        |                      |         |         | 21.000  | 22.500  | 29.9711    | 22.5000  |                                                                  |                         |    |    |   |   |   |   |
| SGO_1049 | 2.154                  | 5.188                | 0.0027  | 0.0065  | 9.000   | 1.500   | 13.4196    | 1.5611   | tRNA pseudouridine synthase B                                    |                         |    |    |   |   |   |   |
|          |                        |                      |         |         | 10.500  | 6.500   | 14.9855    | 6.5000   |                                                                  |                         |    |    |   |   |   |   |
| SGO_1050 | 1.530                  | 4.146                | 0.0605  | 0.2783  | 3.500   |         | 5.2187     |          | ribF; riboflavin biosynthesis protein RibF                       |                         |    |    |   |   |   |   |
|          |                        |                      |         |         | 7.000   | 2.500   | 9.9904     | 2.5000   |                                                                  |                         |    |    |   |   |   |   |

- Show detected proteins only
- Show all proteins

Proteins found: 1179

Filter by category:  
ABC Transporter

Test

Cutoff

q-Value

.005

p-Value

| Signif | Direction | Applies To   |
|--------|-----------|--------------|
| yes    | +         | ratios, bars |
| no     | n/a       | bars         |
| yes    | -         | ratios, bars |
| yes    | +         | p-, q-Values |
| yes    | -         | p-, q-Values |

Dot Plots Dot Plots

Summary Table

SgFn vs Sg

SgPg vs Sg

SgPgFn vs Sg

SgPg vs SgFn

SgPgFn vs SgFn

SgPgFn vs SgPg

Coverage

| Protein  | SgPg vs Sg             |                      |         |         | Raw    |        | Normalized |         | Description                                                                                                       | Log <sub>2</sub> Ratios |    |    |   |   |   |   |
|----------|------------------------|----------------------|---------|---------|--------|--------|------------|---------|-------------------------------------------------------------------------------------------------------------------|-------------------------|----|----|---|---|---|---|
|          | Log <sub>2</sub> Ratio | Log <sub>2</sub> Sum | q-Value | p-Value | SgPg   | Sg     | SgPg       | Sg      |                                                                                                                   | -6                      | -4 | -2 | 0 | 2 | 4 | 6 |
| SGO_1051 |                        | 3.576                |         |         | 8.000  |        | 11.9285    |         | negative regulator of proteolysis                                                                                 |                         |    |    |   |   |   |   |
| SGO_1054 | 0.144                  | 3.662                | 0.1254  | 0.6353  | 3.000  | 4.500  | 4.4732     | 4.6832  | NOL1/NOP2/sun family protein                                                                                      |                         |    |    |   |   |   |   |
|          |                        |                      |         |         |        | 3.500  |            | 3.5000  |                                                                                                                   |                         |    |    |   |   |   |   |
| SGO_1055 | -1.995                 | 6.887                | 0.0009  | 0.0014  | 10.000 | 41.000 | 14.9106    | 42.6691 | phosphate ABC transporter, phosphate-binding protein                                                              |                         |    |    |   |   |   |   |
|          |                        |                      |         |         | 6.500  | 51.500 | 9.2768     | 51.5000 |                                                                                                                   |                         |    |    |   |   |   |   |
| SGO_1057 |                        | 2.585                |         |         |        |        |            |         | pstA; phosphate ABC transporter, permease protein PstA                                                            |                         |    |    |   |   |   |   |
|          |                        |                      |         |         |        | 6.000  |            | 6.0000  |                                                                                                                   |                         |    |    |   |   |   |   |
| SGO_1058 | -1.604                 | 6.514                | 0.0002  | 0.0001  | 7.500  | 31.500 | 11.1830    | 32.7824 | pstB; Phosphate import ATP-binding protein pstB 2 (Phosphate-transporting ATPase 2) (ABC phosphate transporter 2) |                         |    |    |   |   |   |   |
|          |                        |                      |         |         | 8.000  | 36.000 | 11.4175    | 36.0000 |                                                                                                                   |                         |    |    |   |   |   |   |
| SGO_1059 | 0.545                  | 6.866                | 0.0004  | 0.0004  | 22.500 | 23.000 | 33.5489    | 23.9363 | pstB; Phosphate import ATP-binding protein pstB 1 (Phosphate-transporting ATPase 1) (ABC phosphate transporter 1) |                         |    |    |   |   |   |   |
|          |                        |                      |         |         | 25.000 | 23.500 | 35.6798    | 23.5000 |                                                                                                                   |                         |    |    |   |   |   |   |
| SGO_1060 | -0.234                 | 7.789                | 0.0257  | 0.1035  | 36.500 | 52.000 | 54.4238    | 54.1169 | phosphate transport system regulatory protein                                                                     |                         |    |    |   |   |   |   |
|          |                        |                      |         |         | 33.000 | 65.500 | 47.0974    | 65.5000 |                                                                                                                   |                         |    |    |   |   |   |   |
| SGO_1065 | -0.937                 | 6.481                | 0.0002  | 0.0001  | 10.500 | 29.000 | 15.6562    | 30.1806 | hypothetical protein SGO_1065                                                                                     |                         |    |    |   |   |   |   |
|          |                        |                      |         |         | 10.500 | 28.500 | 14.9855    | 28.5000 |                                                                                                                   |                         |    |    |   |   |   |   |
| SGO_1066 | -1.426                 | 6.237                | 0.0027  | 0.0065  | 8.000  | 22.500 | 11.9285    | 23.4160 | hypothetical protein SGO_1066                                                                                     |                         |    |    |   |   |   |   |
|          |                        |                      |         |         | 6.000  | 31.500 | 8.5632     | 31.5000 |                                                                                                                   |                         |    |    |   |   |   |   |
| SGO_1067 |                        | 1.807                |         |         |        |        |            |         | hypothetical protein SGO_1067                                                                                     |                         |    |    |   |   |   |   |
|          |                        |                      |         |         |        | 3.500  |            | 3.5000  |                                                                                                                   |                         |    |    |   |   |   |   |
| SGO_1069 | 0.674                  | 8.712                | 0.0038  | 0.0100  | 95.000 | 84.000 | 141.6511   | 87.4196 | membrane alanyl aminopeptidase                                                                                    |                         |    |    |   |   |   |   |
|          |                        |                      |         |         | 81.500 | 74.000 | 116.3163   | 74.0000 |                                                                                                                   |                         |    |    |   |   |   |   |
| SGO_1072 | 1.254                  | 3.081                |         |         | 4.000  |        | 5.9643     |         | ciaR; Transcriptional regulatory protein CiaR                                                                     |                         |    |    |   |   |   |   |
|          |                        |                      |         |         |        | 2.500  |            | 2.5000  |                                                                                                                   |                         |    |    |   |   |   |   |

- Show detected proteins only
- Show all proteins

Proteins found: 1179

Filter by category:

ABC Transporter

Test

Cutoff

q-Value

.005

p-Value

|             | Signif | Direction | Applies To   |
|-------------|--------|-----------|--------------|
| Red         | yes    | +         | ratios, bars |
| Yellow      | no     | n/a       | bars         |
| Green       | yes    | -         | ratios, bars |
| Pink        | yes    | +         | p-, q-Values |
| Light Green | yes    | -         | p-, q-Values |

Dot Plots Dot Plots

Summary Table

SgFn vs Sg

SgPg vs Sg

SgPgFn vs Sg

SgPg vs SgFn

SgPgFn vs SgFn

SgPgFn vs SgPg

Coverage

| Protein  | SgPg vs Sg             |                      |         |         | Raw      |          | Normalized |           | Description                                       | Log <sub>2</sub> Ratios |    |    |   |   |
|----------|------------------------|----------------------|---------|---------|----------|----------|------------|-----------|---------------------------------------------------|-------------------------|----|----|---|---|
|          | Log <sub>2</sub> Ratio | Log <sub>2</sub> Sum | q-Value | p-Value | SgPg     | Sg       | SgPg       | Sg        |                                                   | -6                      | -4 | -2 | 0 | 2 |
| SGO_1073 | -2.149                 | 5.203                | 0.0133  | 0.0468  | 2.500    | 15.000   | 3.7277     | 15.6106   | Sensor protein CiaH                               |                         |    |    |   |   |
|          |                        |                      |         |         |          | 17.500   |            | 17.5000   |                                                   |                         |    |    |   |   |
| SGO_1075 | 0.098                  | 3.050                |         |         |          |          |            |           | alpha-amylase precursor                           |                         |    |    |   |   |
|          |                        |                      |         |         | 3.000    | 4.000    | 4.2816     | 4.0000    |                                                   |                         |    |    |   |   |
| SGO_1077 | -0.543                 | 5.427                | 0.0040  | 0.0106  | 6.500    | 11.500   | 9.6919     | 11.9682   | coaA; pantothenate kinase                         |                         |    |    |   |   |
|          |                        |                      |         |         | 5.500    | 13.500   | 7.8496     | 13.5000   |                                                   |                         |    |    |   |   |
| SGO_1078 |                        | 4.180                |         |         | 4.500    |          | 6.7098     |           | methyltransferase domain protein                  |                         |    |    |   |   |
|          |                        |                      |         |         | 8.000    |          | 11.4175    |           |                                                   |                         |    |    |   |   |
| SGO_1079 | -0.010                 | 7.139                | 0.1705  | 0.8989  | 20.500   | 27.500   | 30.5668    | 28.6195   | pdp; pyrimidine-nucleoside phosphorylase          |                         |    |    |   |   |
|          |                        |                      |         |         | 27.500   | 42.500   | 39.2478    | 42.5000   |                                                   |                         |    |    |   |   |
| SGO_1080 | 0.227                  | 8.409                | 0.0119  | 0.0406  | 64.000   | 80.500   | 95.4281    | 83.7771   | deoC; deoxyribose-phosphate aldolase              |                         |    |    |   |   |
|          |                        |                      |         |         | 61.500   | 73.000   | 87.7724    | 73.0000   |                                                   |                         |    |    |   |   |
| SGO_1081 | -0.569                 | 4.373                | 0.0588  | 0.2694  | 3.500    | 3.500    | 5.2187     | 3.6425    | cdd; cytidine deaminase                           |                         |    |    |   |   |
|          |                        |                      |         |         | 2.000    | 9.000    | 2.8544     | 9.0000    |                                                   |                         |    |    |   |   |
| SGO_1082 | -0.805                 | 13.082               | 0.0002  | 0.0001  | 1026.000 | 2606.500 | 1529.8314  | 2712.6096 | lipoprotein                                       |                         |    |    |   |   |
|          |                        |                      |         |         | 1141.000 | 2801.500 | 1628.4277  | 2801.5000 |                                                   |                         |    |    |   |   |
| SGO_1083 |                        | 8.625                |         |         | 149.500  |          | 222.9140   |           | sugar ABC transporter, ATP-binding protein SP0846 |                         |    |    |   |   |
|          |                        |                      |         |         | 120.500  |          | 171.9768   |           |                                                   |                         |    |    |   |   |
| SGO_1088 | 0.884                  | 4.195                | 0.0275  | 0.1112  | 5.000    | 2.000    | 7.4553     | 2.0814    | transcription regulator, LysR family              |                         |    |    |   |   |
|          |                        |                      |         |         | 3.000    | 4.500    | 4.2816     | 4.5000    |                                                   |                         |    |    |   |   |
| SGO_1090 | -0.245                 | 5.633                | 0.0727  | 0.3447  | 9.000    | 10.500   | 13.4196    | 10.9275   | pseudouridine synthase, RluA family               |                         |    |    |   |   |
|          |                        |                      |         |         | 6.500    | 16.000   | 9.2768     | 16.0000   |                                                   |                         |    |    |   |   |
| SGO_1091 |                        | 2.022                |         |         |          | 1.500    |            | 1.5611    | hypothetical protein SGO_1091                     |                         |    |    |   |   |
|          |                        |                      |         |         |          | 2.500    |            | 2.5000    |                                                   |                         |    |    |   |   |

- Show detected proteins only
- Show all proteins

Proteins found: 1179

Filter by category:  
ABC Transporter

Test

Cutoff

q-Value

.005

p-Value

|                                           | Signif | Direction | Applies To   |
|-------------------------------------------|--------|-----------|--------------|
| <span style="color: red;">■</span>        | yes    | +         | ratios, bars |
| <span style="color: yellow;">■</span>     | no     | n/a       | bars         |
| <span style="color: green;">■</span>      | yes    | -         | ratios, bars |
| <span style="color: pink;">■</span>       | yes    | +         | p-, q-Values |
| <span style="color: lightgreen;">■</span> | yes    | -         | p-, q-Values |

Dot Plots Dot Plots

Summary Table

SgFn vs Sg

SgPg vs Sg

SgPgFn vs Sg

SgPg vs SgFn

SgPgFn vs SgFn

SgPgFn vs SgPg

Coverage

| Protein  | SgPg vs Sg             |                      |         |         | Raw     |        |          |         | Normalized |    |      |    | Description | Log <sub>2</sub> Ratios |    |    |   |   |   |   |
|----------|------------------------|----------------------|---------|---------|---------|--------|----------|---------|------------|----|------|----|-------------|-------------------------|----|----|---|---|---|---|
|          | Log <sub>2</sub> Ratio | Log <sub>2</sub> Sum | q-Value | p-Value | SgPg    | Sg     | SgPg     | Sg      | SgPg       | Sg | SgPg | Sg |             | -6                      | -4 | -2 | 0 | 2 | 4 | 6 |
| SGO_1096 | 3.057                  | 10.001               | 0.0001  | 0.0000  | 295.000 | 49.500 | 439.8638 | 51.5151 |            |    |      |    |             |                         |    |    |   |   |   |   |
|          |                        |                      |         |         | 332.500 | 58.500 | 474.5418 | 58.5000 |            |    |      |    |             |                         |    |    |   |   |   |   |
| SGO_1097 |                        | 1.000                |         |         |         |        |          |         |            |    |      |    |             |                         |    |    |   |   |   |   |
|          |                        |                      |         |         |         | 2.000  |          | 2.0000  |            |    |      |    |             |                         |    |    |   |   |   |   |
| SGO_1098 | 2.384                  | 5.365                | 0.0434  | 0.1888  | 9.500   |        | 14.1651  |         |            |    |      |    |             |                         |    |    |   |   |   |   |
|          |                        |                      |         |         | 16.500  | 3.500  | 23.5487  | 3.5000  |            |    |      |    |             |                         |    |    |   |   |   |   |
| SGO_1099 |                        | 1.322                |         |         |         |        |          |         |            |    |      |    |             |                         |    |    |   |   |   |   |
|          |                        |                      |         |         |         | 2.500  |          | 2.5000  |            |    |      |    |             |                         |    |    |   |   |   |   |
| SGO_1100 |                        | 3.807                |         |         |         |        |          |         |            |    |      |    |             |                         |    |    |   |   |   |   |
|          |                        |                      |         |         |         | 14.000 |          | 14.0000 |            |    |      |    |             |                         |    |    |   |   |   |   |
| SGO_1103 |                        | 3.944                |         |         |         | 9.500  |          | 9.8867  |            |    |      |    |             |                         |    |    |   |   |   |   |
|          |                        |                      |         |         |         | 5.500  |          | 5.5000  |            |    |      |    |             |                         |    |    |   |   |   |   |
| SGO_1104 |                        | 4.277                |         |         |         | 9.500  |          | 9.8867  |            |    |      |    |             |                         |    |    |   |   |   |   |
|          |                        |                      |         |         |         | 9.500  |          | 9.5000  |            |    |      |    |             |                         |    |    |   |   |   |   |
| SGO_1107 | -0.775                 | 5.151                | 0.0690  | 0.3237  |         | 16.500 |          | 17.1717 |            |    |      |    |             |                         |    |    |   |   |   |   |
|          |                        |                      |         |         | 5.500   | 10.500 | 7.8496   | 10.5000 |            |    |      |    |             |                         |    |    |   |   |   |   |
| SGO_1109 | -0.059                 | 8.205                | 0.0928  | 0.4547  | 47.000  | 66.500 | 70.0800  | 69.2072 |            |    |      |    |             |                         |    |    |   |   |   |   |
|          |                        |                      |         |         | 52.000  | 81.500 | 74.2141  | 81.5000 |            |    |      |    |             |                         |    |    |   |   |   |   |
| SGO_1110 |                        | 6.147                |         |         |         | 33.000 |          | 34.3434 |            |    |      |    |             |                         |    |    |   |   |   |   |
|          |                        |                      |         |         |         | 36.500 |          | 36.5000 |            |    |      |    |             |                         |    |    |   |   |   |   |
| SGO_1111 | -2.353                 | 7.016                | 0.0010  | 0.0016  | 6.500   | 45.500 | 9.6919   | 47.3523 |            |    |      |    |             |                         |    |    |   |   |   |   |
|          |                        |                      |         |         | 8.000   | 61.000 | 11.4175  | 61.0000 |            |    |      |    |             |                         |    |    |   |   |   |   |
| SGO_1112 | -1.735                 | 7.327                | 0.0004  | 0.0004  | 10.000  | 58.000 | 14.9106  | 60.3612 |            |    |      |    |             |                         |    |    |   |   |   |   |
|          |                        |                      |         |         | 16.000  | 62.500 | 22.8351  | 62.5000 |            |    |      |    |             |                         |    |    |   |   |   |   |

- Show detected proteins only
- Show all proteins

Proteins found: 1179

Filter by category:

ABC Transporter

Test

Cutoff

q-Value

.005

p-Value

|             | Signif | Direction | Applies To   |
|-------------|--------|-----------|--------------|
| Red         | yes    | +         | ratios, bars |
| Yellow      | no     | n/a       | bars         |
| Green       | yes    | -         | ratios, bars |
| Pink        | yes    | +         | p-, q-Values |
| Light Green | yes    | -         | p-, q-Values |

Dot Plots Dot Plots

Summary Table

SgFn vs Sg

SgPg vs Sg

SgPgFn vs Sg

SgPg vs SgFn

SgPgFn vs SgFn

SgPgFn vs SgPg

Coverage

| Protein  | SgPg vs Sg             |                      |         |         | Raw    |          | Normalized |           | Description                                                | Log <sub>2</sub> Ratios |    |    |   |   |
|----------|------------------------|----------------------|---------|---------|--------|----------|------------|-----------|------------------------------------------------------------|-------------------------|----|----|---|---|
|          | Log <sub>2</sub> Ratio | Log <sub>2</sub> Sum | q-Value | p-Value | SgPg   | Sg       | SgPg       | Sg        |                                                            | -6                      | -4 | -2 | 0 | 2 |
| SGO_1113 | -3.955                 | 11.208               | 0.0000  | 0.0000  | 58.000 | 1053.000 | 86.4817    | 1095.8672 | fruA; PTS system, fructose specific IIABC components       |                         |    |    |   |   |
|          |                        |                      |         |         | 41.500 | 1124.000 | 59.2285    | 1124.0000 |                                                            |                         |    |    |   |   |
| SGO_1114 | -1.137                 | 7.080                | 0.0005  | 0.0005  | 15.500 | 46.500   | 23.1115    | 48.3930   | Protein of unknown function (DUF1149) superfamily          |                         |    |    |   |   |
|          |                        |                      |         |         | 13.500 | 44.500   | 19.2671    | 44.5000   |                                                            |                         |    |    |   |   |
| SGO_1115 | 1.302                  | 4.389                | 0.0357  | 0.1516  | 5.000  |          | 7.4553     |           | DegV family protein                                        |                         |    |    |   |   |
|          |                        |                      |         |         | 7.000  | 3.500    | 9.9904     | 3.5000    |                                                            |                         |    |    |   |   |
| SGO_1116 | 2.860                  | 6.972                | 0.0002  | 0.0001  | 39.000 | 6.500    | 58.1515    | 6.7646    | dapB; dihydrodipicolinate reductase                        |                         |    |    |   |   |
|          |                        |                      |         |         | 36.500 | 8.500    | 52.0926    | 8.5000    |                                                            |                         |    |    |   |   |
| SGO_1117 |                        | 3.130                |         |         | 3.000  |          | 4.4732     |           | pcnA; polynucleotide adenylyltransferase                   |                         |    |    |   |   |
|          |                        |                      |         |         | 3.000  |          | 4.2816     |           |                                                            |                         |    |    |   |   |
| SGO_1118 | -0.081                 | 3.858                | 0.1344  | 0.6881  | 3.500  |          | 5.2187     |           | ABC transporter, ATP-binding protein SP1553                |                         |    |    |   |   |
|          |                        |                      |         |         | 3.000  | 5.000    | 4.2816     | 5.0000    |                                                            |                         |    |    |   |   |
| SGO_1119 |                        | 2.036                |         |         |        | 2.500    |            | 2.6018    | Abi-alpha protein, putative                                |                         |    |    |   |   |
|          |                        |                      |         |         |        | 1.500    |            | 1.5000    |                                                            |                         |    |    |   |   |
| SGO_1120 | 1.050                  | 8.420                | 0.0004  | 0.0005  | 78.000 | 48.000   | 116.3030   | 49.9541   | guaA; GMP synthase                                         |                         |    |    |   |   |
|          |                        |                      |         |         | 80.000 | 62.000   | 114.1755   | 62.0000   |                                                            |                         |    |    |   |   |
| SGO_1121 | -0.972                 | 3.402                |         |         |        |          |            |           | transcription regulator, GntR family                       |                         |    |    |   |   |
|          |                        |                      |         |         | 2.500  | 7.000    | 3.5680     | 7.0000    |                                                            |                         |    |    |   |   |
| SGO_1123 | 1.244                  | 7.970                | 0.0002  | 0.0001  | 57.000 | 35.000   | 84.9906    | 36.4248   | ffh; signal recognition particle protein                   |                         |    |    |   |   |
|          |                        |                      |         |         | 64.000 | 38.000   | 91.3404    | 38.0000   |                                                            |                         |    |    |   |   |
| SGO_1124 |                        | 3.025                |         |         |        | 3.500    |            | 3.6425    | cell surface hydrolase                                     |                         |    |    |   |   |
|          |                        |                      |         |         |        | 4.500    |            | 4.5000    |                                                            |                         |    |    |   |   |
| SGO_1128 |                        | 2.000                |         |         |        |          |            |           | bacteriocin-associated integral membrane protein subfamily |                         |    |    |   |   |
|          |                        |                      |         |         |        | 4.000    |            | 4.0000    |                                                            |                         |    |    |   |   |

- Show detected proteins only
- Show all proteins

Proteins found: 1179

Filter by category:  
ABC Transporter

Test

Cutoff

q-Value

.005

p-Value

| Signif | Direction | Applies To   |
|--------|-----------|--------------|
| yes    | +         | ratios, bars |
| no     | n/a       | bars         |
| yes    | -         | ratios, bars |
| yes    | +         | p-, q-Values |
| yes    | -         | p-, q-Values |

Dot Plots Dot Plots

Summary Table

SgFn vs Sg

SgPg vs Sg

SgPgFn vs Sg

SgPg vs SgFn

SgPgFn vs SgFn

SgPgFn vs SgPg

Coverage

| Protein  | SgPg vs Sg             |                      |         |         | Raw     |         | Normalized |          | Description                                                | Log <sub>2</sub> Ratios |    |    |   |   |
|----------|------------------------|----------------------|---------|---------|---------|---------|------------|----------|------------------------------------------------------------|-------------------------|----|----|---|---|
|          | Log <sub>2</sub> Ratio | Log <sub>2</sub> Sum | q-Value | p-Value | SgPg    | Sg      | SgPg       | Sg       |                                                            | -6                      | -4 | -2 | 0 | 2 |
| SGO_1129 | -0.806                 | 6.457                | 0.0025  | 0.0058  | 12.500  | 28.000  | 18.6383    | 29.1399  | lplA; lipoate protein ligase A                             |                         |    |    |   |   |
|          |                        |                      |         |         | 9.500   | 26.500  | 13.5583    | 26.5000  |                                                            |                         |    |    |   |   |
| SGO_1130 | -0.666                 | 8.509                | 0.0002  | 0.0001  | 48.500  | 109.000 | 72.3166    | 113.4373 | dihydrolipoamide dehydrogenase                             |                         |    |    |   |   |
|          |                        |                      |         |         | 48.000  | 110.000 | 68.5053    | 110.0000 |                                                            |                         |    |    |   |   |
| SGO_1131 | -0.208                 | 6.974                | 0.0108  | 0.0364  | 21.000  | 32.000  | 31.3123    | 33.3027  | sucB; dihydrolipoamide S-acetyltransferase                 |                         |    |    |   |   |
|          |                        |                      |         |         | 19.000  | 34.000  | 27.1167    | 34.0000  |                                                            |                         |    |    |   |   |
| SGO_1132 | -0.631                 | 6.047                | 0.0181  | 0.0688  | 8.500   | 15.000  | 12.6740    | 15.6106  | acetoin dehydrogenase                                      |                         |    |    |   |   |
|          |                        |                      |         |         | 9.000   | 25.000  | 12.8447    | 25.0000  |                                                            |                         |    |    |   |   |
| SGO_1133 | -0.813                 | 6.658                | 0.0048  | 0.0135  | 13.500  | 35.000  | 20.1294    | 36.4248  | acoA; acetoin dehydrogenase                                |                         |    |    |   |   |
|          |                        |                      |         |         | 11.500  | 28.000  | 16.4127    | 28.0000  |                                                            |                         |    |    |   |   |
| SGO_1134 | -0.566                 | 3.898                | 0.0626  | 0.2887  | 2.500   | 4.500   | 3.7277     | 4.6832   | hypothetical protein SGO_1134                              |                         |    |    |   |   |
|          |                        |                      |         |         |         | 6.500   |            | 6.5000   |                                                            |                         |    |    |   |   |
| SGO_1139 | 1.267                  | 6.969                | 0.0006  | 0.0007  | 29.000  | 15.000  | 43.2408    | 15.6106  | GTP-binding protein                                        |                         |    |    |   |   |
|          |                        |                      |         |         | 31.500  | 21.500  | 44.9566    | 21.5000  |                                                            |                         |    |    |   |   |
| SGO_1140 | 0.482                  | 8.625                | 0.0017  | 0.0033  | 77.500  | 85.500  | 115.5574   | 88.9807  | clpX; ATP-dependent Clp protease, ATP-binding subunit ClpX |                         |    |    |   |   |
|          |                        |                      |         |         | 80.000  | 76.000  | 114.1755   | 76.0000  |                                                            |                         |    |    |   |   |
| SGO_1141 | 0.710                  | 4.941                | 0.0144  | 0.0518  | 7.500   | 4.500   | 11.1830    | 4.6832   | folA; dihydrofolate reductase                              |                         |    |    |   |   |
|          |                        |                      |         |         | 5.500   | 7.000   | 7.8496     | 7.0000   |                                                            |                         |    |    |   |   |
| SGO_1143 | 1.268                  | 5.705                | 0.0018  | 0.0037  | 12.000  | 5.500   | 17.8928    | 5.7239   | thyA; thymidylate synthase                                 |                         |    |    |   |   |
|          |                        |                      |         |         | 13.000  | 10.000  | 18.5535    | 10.0000  |                                                            |                         |    |    |   |   |
| SGO_1144 | 1.912                  | 9.437                | 0.0000  | 0.0000  | 184.000 | 66.500  | 274.3557   | 69.2072  | glcK; glucokinase                                          |                         |    |    |   |   |
|          |                        |                      |         |         | 191.500 | 76.500  | 273.3075   | 76.5000  |                                                            |                         |    |    |   |   |
| SGO_1145 |                        | 3.781                |         |         |         | 6.000   |            | 6.2443   | cell surface hydrolase                                     |                         |    |    |   |   |
|          |                        |                      |         |         |         | 7.500   |            | 7.5000   |                                                            |                         |    |    |   |   |

- Show detected proteins only
- Show all proteins

Proteins found: 1179

Filter by category:

ABC Transporter

Test

Cutoff

q-Value

.005

p-Value

|             | Signif | Direction | Applies To   |
|-------------|--------|-----------|--------------|
| Red         | yes    | +         | ratios, bars |
| Yellow      | no     | n/a       | bars         |
| Green       | yes    | -         | ratios, bars |
| Pink        | yes    | +         | p-, q-Values |
| Light Green | yes    | -         | p-, q-Values |

Dot Plots Dot Plots

Summary Table

SgFn vs Sg

SgPg vs Sg

SgPgFn vs Sg

SgPg vs SgFn

SgPgFn vs SgFn

SgPgFn vs SgPg

Coverage

| Protein  | SgPg vs Sg             |                      |         |         | Raw     |         | Normalized |          | Description                                   | Log <sub>2</sub> Ratios |    |    |   |   |   |   |
|----------|------------------------|----------------------|---------|---------|---------|---------|------------|----------|-----------------------------------------------|-------------------------|----|----|---|---|---|---|
|          | Log <sub>2</sub> Ratio | Log <sub>2</sub> Sum | q-Value | p-Value | SgPg    | Sg      | SgPg       | Sg       |                                               | -6                      | -4 | -2 | 0 | 2 | 4 | 6 |
| SGO_1148 |                        | 8.314                |         |         |         | 164.000 |            | 170.6764 | cshB; surface-associated protein CshB         |                         |    |    |   |   |   |   |
|          |                        |                      |         |         |         | 147.500 |            | 147.5000 |                                               |                         |    |    |   |   |   |   |
| SGO_1149 |                        | 3.830                |         |         |         | 5.500   |            | 5.7239   | Pneumococcal vaccine antigen A-like protein   |                         |    |    |   |   |   |   |
|          |                        |                      |         |         |         | 8.500   |            | 8.5000   |                                               |                         |    |    |   |   |   |   |
| SGO_1150 | 1.321                  | 5.394                | 0.0177  | 0.0671  | 12.500  |         | 18.6383    |          | hypothetical protein SGO_1150                 |                         |    |    |   |   |   |   |
|          |                        |                      |         |         | 11.500  | 7.000   | 16.4127    | 7.0000   |                                               |                         |    |    |   |   |   |   |
| SGO_1151 | 1.725                  | 9.323                | 0.0000  | 0.0000  | 165.500 | 68.500  | 246.7711   | 71.2886  | glyA; serine hydroxymethyltransferase         |                         |    |    |   |   |   |   |
|          |                        |                      |         |         | 171.500 | 77.500  | 244.7637   | 77.5000  |                                               |                         |    |    |   |   |   |   |
| SGO_1154 | 0.348                  | 7.523                | 0.0322  | 0.1340  | 33.500  | 47.500  | 49.9506    | 49.4337  | prfA; peptide chain release factor 1          |                         |    |    |   |   |   |   |
|          |                        |                      |         |         | 36.500  | 32.500  | 52.0926    | 32.5000  |                                               |                         |    |    |   |   |   |   |
| SGO_1155 | 0.258                  | 6.054                | 0.1207  | 0.6079  | 9.000   | 9.500   | 13.4196    | 9.8867   | tdk; thymidine kinase                         |                         |    |    |   |   |   |   |
|          |                        |                      |         |         | 15.500  | 21.000  | 22.1215    | 21.0000  |                                               |                         |    |    |   |   |   |   |
| SGO_1159 | 1.630                  | 3.910                | 0.0590  | 0.2706  | 3.000   |         | 4.4732     |          | guaC; guanosine monophosphate reductase       |                         |    |    |   |   |   |   |
|          |                        |                      |         |         | 6.000   | 2.000   | 8.5632     | 2.0000   |                                               |                         |    |    |   |   |   |   |
| SGO_1163 |                        |                      |         |         |         |         |            |          | Iron permease FTR1 family                     |                         |    |    |   |   |   |   |
| SGO_1166 |                        | 3.272                |         |         |         | 4.000   |            | 4.1628   | voltage-gated chloride channel family protein |                         |    |    |   |   |   |   |
|          |                        |                      |         |         |         | 5.500   |            | 5.5000   |                                               |                         |    |    |   |   |   |   |
| SGO_1167 | 0.927                  | 8.426                | 0.0002  | 0.0001  | 76.000  | 54.000  | 113.3208   | 56.1983  | nox; NADH oxidase                             |                         |    |    |   |   |   |   |
|          |                        |                      |         |         | 78.500  | 62.500  | 112.0347   | 62.5000  |                                               |                         |    |    |   |   |   |   |
| SGO_1169 | 0.631                  | 7.557                | 0.0079  | 0.0244  | 44.000  | 37.500  | 65.6068    | 39.0266  | NADPH-dependent FMN reductase                 |                         |    |    |   |   |   |   |
|          |                        |                      |         |         | 34.500  | 34.500  | 49.2382    | 34.5000  |                                               |                         |    |    |   |   |   |   |
| SGO_1170 | -0.581                 | 8.759                | 0.0002  | 0.0001  | 60.000  | 125.500 | 89.4638    | 130.6091 | NADPH-dependent FMN reductase                 |                         |    |    |   |   |   |   |
|          |                        |                      |         |         | 59.000  | 129.000 | 84.2044    | 129.0000 |                                               |                         |    |    |   |   |   |   |

- Show detected proteins only
- Show all proteins

Proteins found: 1179

Filter by category:

ABC Transporter

Test

Cutoff

q-Value

.005

p-Value

| Signif | Direction | Applies To   |
|--------|-----------|--------------|
| yes    | +         | ratios, bars |
| no     | n/a       | bars         |
| yes    | -         | ratios, bars |
| yes    | +         | p-, q-Values |
| yes    | -         | p-, q-Values |

Dot Plots Dot Plots

Summary Table

SgFn vs Sg

SgPg vs Sg

SgPgFn vs Sg

SgPg vs SgFn

SgPgFn vs SgFn

SgPgFn vs SgPg

Coverage

| Protein  | SgPg vs Sg             |                      |         |         | Raw     |         | Normalized |          | Description                                         | Log <sub>2</sub> Ratios |    |    |   |   |
|----------|------------------------|----------------------|---------|---------|---------|---------|------------|----------|-----------------------------------------------------|-------------------------|----|----|---|---|
|          | Log <sub>2</sub> Ratio | Log <sub>2</sub> Sum | q-Value | p-Value | SgPg    | Sg      | SgPg       | Sg       |                                                     | -6                      | -4 | -2 | 0 | 2 |
| SGO_1171 | -4.040                 | 7.574                | 0.0001  | 0.0000  | 3.500   | 89.000  | 5.2187     | 92.6232  | thioredoxin family protein                          |                         |    |    |   |   |
|          |                        |                      |         |         | 4.000   | 87.000  | 5.7088     | 87.0000  |                                                     |                         |    |    |   |   |
| SGO_1174 |                        | 3.417                |         |         |         | 4.500   |            | 4.6832   | histidine kinase                                    |                         |    |    |   |   |
|          |                        |                      |         |         |         | 6.000   |            | 6.0000   |                                                     |                         |    |    |   |   |
| SGO_1176 |                        | 0.585                |         |         |         | 1.500   |            | 1.5000   | peptide methionine sulfoxide reductase-like protein |                         |    |    |   |   |
|          |                        |                      |         |         |         |         |            |          |                                                     |                         |    |    |   |   |
| SGO_1182 |                        | 1.058                |         |         |         | 2.000   |            | 2.0814   | LPXTG cell wall surface protein                     |                         |    |    |   |   |
|          |                        |                      |         |         |         |         |            |          |                                                     |                         |    |    |   |   |
| SGO_1184 |                        | 3.412                |         |         |         | 3.500   |            | 3.6425   | GdmH                                                |                         |    |    |   |   |
|          |                        |                      |         |         |         | 7.000   |            | 7.0000   |                                                     |                         |    |    |   |   |
| SGO_1185 | 1.029                  | 5.215                | 0.0048  | 0.0134  | 9.500   | 7.000   | 14.1651    | 7.2850   | acetyltransferase, GNAT family                      |                         |    |    |   |   |
|          |                        |                      |         |         | 7.500   | 5.000   | 10.7040    | 5.0000   |                                                     |                         |    |    |   |   |
| SGO_1186 |                        | 5.718                |         |         |         | 27.500  |            | 28.6195  | ABC transporter, permease/ATP-binding protein       |                         |    |    |   |   |
|          |                        |                      |         |         |         | 24.000  |            | 24.0000  |                                                     |                         |    |    |   |   |
| SGO_1187 |                        | 6.301                |         |         |         | 33.500  |            | 34.8638  | ABC transporter, permease/ATP-binding protein       |                         |    |    |   |   |
|          |                        |                      |         |         |         | 44.000  |            | 44.0000  |                                                     |                         |    |    |   |   |
| SGO_1189 | -3.706                 | 9.249                | 0.0003  | 0.0003  | 12.500  | 292.500 | 18.6383    | 304.4076 | lipoprotein, putative                               |                         |    |    |   |   |
|          |                        |                      |         |         | 17.500  | 260.500 | 24.9759    | 260.5000 |                                                     |                         |    |    |   |   |
| SGO_1191 | 0.125                  | 11.651               | 0.0327  | 0.1371  | 580.500 | 789.500 | 865.5625   | 821.6402 | rpL; ribosomal protein L7/L12                       |                         |    |    |   |   |
|          |                        |                      |         |         | 568.000 | 718.000 | 810.6459   | 718.0000 |                                                     |                         |    |    |   |   |
| SGO_1192 | 0.701                  | 9.702                | 0.0111  | 0.0375  | 141.000 | 144.500 | 210.2400   | 150.3825 | BL5; 50S ribosomal protein L10                      |                         |    |    |   |   |
|          |                        |                      |         |         | 216.500 | 163.500 | 308.9874   | 163.5000 |                                                     |                         |    |    |   |   |
| SGO_1193 | 0.996                  | 6.452                | 0.0037  | 0.0096  | 22.500  | 13.500  | 33.5489    | 14.0496  | gid; Glucose inhibited division protein A           |                         |    |    |   |   |
|          |                        |                      |         |         | 17.500  | 15.000  | 24.9759    | 15.0000  |                                                     |                         |    |    |   |   |

- Show detected proteins only
- Show all proteins

Proteins found:  
1179

Filter by category:

ABC Transporter

Test

Cutoff

q-Value

.005

p-Value

|  | Signif | Direction | Applies To   |
|--|--------|-----------|--------------|
|  | yes    | +         | ratios, bars |
|  | no     | n/a       | bars         |
|  | yes    | -         | ratios, bars |
|  | yes    | +         | p-, q-Values |
|  | yes    | -         | p-, q-Values |

Dot Plots Dot Plots



Summary Table

SgFn vs Sg

SgPg vs Sg

SgPgFn vs Sg

SgPg vs SgFn

SgPgFn vs SgFn

SgPgFn vs SgPg

Coverage

| Protein  | SgPg vs Sg             |                      |         |         | Raw     |         | Normalized |          | Description                                         | Log <sub>2</sub> Ratios |    |    |   |   |   |   |
|----------|------------------------|----------------------|---------|---------|---------|---------|------------|----------|-----------------------------------------------------|-------------------------|----|----|---|---|---|---|
|          | Log <sub>2</sub> Ratio | Log <sub>2</sub> Sum | q-Value | p-Value | SgPg    | Sg      | SgPg       | Sg       |                                                     | -6                      | -4 | -2 | 0 | 2 | 4 | 6 |
| SGO_1196 |                        | 2.227                |         |         |         | 4.500   |            | 4.6832   | satD; SatD-like protein                             |                         |    |    |   |   |   |   |
| SGO_1197 | -1.218                 | 8.057                | 0.0018  | 0.0038  | 24.000  | 79.500  | 35.7855    | 82.7364  | topA; DNA topoisomerase I                           |                         |    |    |   |   |   |   |
| SGO_1198 | -0.387                 | 8.825                | 0.0055  | 0.0161  | 66.500  | 134.000 | 99.1557    | 139.4551 | DNA processing Smf protein                          |                         |    |    |   |   |   |   |
| SGO_1199 | -0.356                 | 3.409                | 0.0322  | 0.1336  | 2.000   | 3.500   | 2.9821     | 3.6425   | acetyltransferase, CysE/LacA/LpxA/NodL family       |                         |    |    |   |   |   |   |
| SGO_1202 | 0.592                  | 5.619                | 0.0154  | 0.0563  | 8.000   | 9.000   | 11.9285    | 9.3664   | GTP-binding protein                                 |                         |    |    |   |   |   |   |
| SGO_1203 | 0.746                  | 6.612                | 0.0027  | 0.0066  | 19.000  | 15.500  | 28.3302    | 16.1310  | anaerobic ribonucleotide reductase                  |                         |    |    |   |   |   |   |
| SGO_1205 | 0.892                  | 4.892                | 0.0147  | 0.0533  | 5.500   | 7.000   | 8.2009     | 7.2850   | dapA; dihydrodipicolinate synthase                  |                         |    |    |   |   |   |   |
| SGO_1206 | -0.353                 | 7.392                | 0.0040  | 0.0107  | 25.500  | 42.500  | 38.0221    | 44.2302  | asd; aspartate-semialdehyde dehydrogenase           |                         |    |    |   |   |   |   |
| SGO_1208 |                        | 3.604                |         |         |         | 4.000   |            | 4.1628   | Hypothetical FAD-dependent oxidoreductase, putative |                         |    |    |   |   |   |   |
| SGO_1210 | 0.250                  | 5.689                | 0.0723  | 0.3419  | 12.500  | 11.500  | 18.6383    | 11.9682  | fhs-1; formate--tetrahydrofolate ligase             |                         |    |    |   |   |   |   |
| SGO_1213 | -2.296                 | 5.647                | 0.0472  | 0.2066  | 3.000   | 16.000  | 4.4732     | 16.6514  | coaC; phosphopantothenoilcysteine decarboxylase     |                         |    |    |   |   |   |   |
| SGO_1215 | 0.815                  | 10.153               | 0.0002  | 0.0001  | 243.000 | 190.000 | 362.3285   | 197.7348 | manB; phosphomannomutase                            |                         |    |    |   |   |   |   |

- Show detected proteins only
- Show all proteins

Proteins found: 1179

Filter by category:  
ABC Transporter

Test Cutoff

q-Value

.005

p-Value

| Signif | Direction | Applies To   |
|--------|-----------|--------------|
| yes    | +         | ratios, bars |
| no     | n/a       | bars         |
| yes    | -         | ratios, bars |
| yes    | +         | p-, q-Values |
| yes    | -         | p-, q-Values |

Dot Plots Dot Plots

Summary Table

SgFn vs Sg

SgPg vs Sg

SgPgFn vs Sg

SgPg vs SgFn

SgPgFn vs SgFn

SgPgFn vs SgPg

Coverage

| Protein  | SgPg vs Sg             |                      |         |         | Raw     |         | Normalized |          | Description                                           | Log <sub>2</sub> Ratios |    |    |   |   |
|----------|------------------------|----------------------|---------|---------|---------|---------|------------|----------|-------------------------------------------------------|-------------------------|----|----|---|---|
|          | Log <sub>2</sub> Ratio | Log <sub>2</sub> Sum | q-Value | p-Value | SgPg    | Sg      | SgPg       | Sg       |                                                       | -6                      | -4 | -2 | 0 | 2 |
| SGO_1216 | 1.790                  | 7.228                | 0.0010  | 0.0016  | 43.000  | 18.500  | 64.1157    | 19.2531  | bta; Possible bacteriocin transport accessory protein |                         |    |    |   |   |
|          |                        |                      |         |         | 36.500  | 14.500  | 52.0926    | 14.5000  |                                                       |                         |    |    |   |   |
| SGO_1219 | 0.089                  | 7.683                | 0.0652  | 0.3035  | 36.000  | 44.000  | 53.6783    | 45.7912  | pta; phosphate acetyltransferase                      |                         |    |    |   |   |
|          |                        |                      |         |         | 36.500  | 54.000  | 52.0926    | 54.0000  |                                                       |                         |    |    |   |   |
| SGO_1221 |                        | 7.145                |         |         |         | 62.000  |            | 64.5240  | ppnK; Probable inorganic polyphosphate/ATP-NAD kinase |                         |    |    |   |   |
|          |                        |                      |         |         |         | 77.000  |            | 77.0000  |                                                       |                         |    |    |   |   |
| SGO_1222 | -0.323                 | 4.321                | 0.0170  | 0.0631  |         | 7.000   |            | 7.2850   | GTP pyrophosphokinase-like protein                    |                         |    |    |   |   |
|          |                        |                      |         |         | 4.000   | 7.000   | 5.7088     | 7.0000   |                                                       |                         |    |    |   |   |
| SGO_1224 | 0.647                  | 8.869                | 0.0008  | 0.0012  | 100.500 | 89.500  | 149.8519   | 93.1435  | Ribose-phosphate pyrophosphokinase 2                  |                         |    |    |   |   |
|          |                        |                      |         |         | 95.000  | 89.000  | 135.5834   | 89.0000  |                                                       |                         |    |    |   |   |
| SGO_1225 | 0.546                  | 5.333                | 0.0081  | 0.0252  | 7.000   | 7.500   | 10.4374    | 7.8053   | pyridoxal-phosphate dependent aminotransferase        |                         |    |    |   |   |
|          |                        |                      |         |         | 9.500   | 8.500   | 13.5583    | 8.5000   |                                                       |                         |    |    |   |   |
| SGO_1226 | 0.436                  | 6.473                | 0.0366  | 0.1558  | 16.000  | 13.500  | 23.8570    | 14.0496  | hypothetical protein SGO_1226                         |                         |    |    |   |   |
|          |                        |                      |         |         | 18.500  | 24.500  | 26.4031    | 24.5000  |                                                       |                         |    |    |   |   |
| SGO_1228 | 0.534                  | 4.773                | 0.0171  | 0.0636  | 6.000   | 6.500   | 8.9464     | 6.7646   | DNA-binding protein BH0551                            |                         |    |    |   |   |
|          |                        |                      |         |         | 5.000   | 4.500   | 7.1360     | 4.5000   |                                                       |                         |    |    |   |   |
| SGO_1230 | -2.690                 | 6.240                | 0.0003  | 0.0003  | 4.000   | 33.500  | 5.9643     | 34.8638  | srtA; sortase A                                       |                         |    |    |   |   |
|          |                        |                      |         |         | 3.000   | 30.500  | 4.2816     | 30.5000  |                                                       |                         |    |    |   |   |
| SGO_1231 | -1.323                 | 8.182                | 0.0024  | 0.0054  | 21.000  | 90.000  | 31.3123    | 93.6639  | gyrA; DNA gyrase, A subunit                           |                         |    |    |   |   |
|          |                        |                      |         |         | 37.500  | 112.000 | 53.5198    | 112.0000 |                                                       |                         |    |    |   |   |
| SGO_1232 | 2.941                  | 10.367               | 0.0001  | 0.0000  | 398.500 | 65.000  | 594.1889   | 67.6461  | L-lactate dehydrogenase                               |                         |    |    |   |   |
|          |                        |                      |         |         | 402.000 | 85.500  | 573.7318   | 85.5000  |                                                       |                         |    |    |   |   |
| SGO_1234 | 0.414                  | 10.895               | 0.0030  | 0.0073  | 368.500 | 359.500 | 549.4570   | 374.1351 | rpsA; 30S ribosomal protein S1                        |                         |    |    |   |   |
|          |                        |                      |         |         | 376.000 | 444.000 | 536.6247   | 444.0000 |                                                       |                         |    |    |   |   |

- Show detected proteins only
- Show all proteins

Proteins found: 1179

Filter by category:

ABC Transporter

Test

Cutoff

q-Value

.005

p-Value

|             | Signif | Direction | Applies To   |
|-------------|--------|-----------|--------------|
| Red         | yes    | +         | ratios, bars |
| Yellow      | no     | n/a       | bars         |
| Green       | yes    | -         | ratios, bars |
| Pink        | yes    | +         | p-, q-Values |
| Light Green | yes    | -         | p-, q-Values |

Dot Plots Dot Plots

Summary Table

SgFn vs Sg

SgPg vs Sg

SgPgFn vs Sg

SgPg vs SgFn

SgPgFn vs SgFn

SgPgFn vs SgPg

Coverage

| Protein  | SgPg vs Sg             |                      |         |         | Raw    |         | Normalized |          | Description                                      | Log <sub>2</sub> Ratios |    |    |   |   |   |   |
|----------|------------------------|----------------------|---------|---------|--------|---------|------------|----------|--------------------------------------------------|-------------------------|----|----|---|---|---|---|
|          | Log <sub>2</sub> Ratio | Log <sub>2</sub> Sum | q-Value | p-Value | SgPg   | Sg      | SgPg       | Sg       |                                                  | -6                      | -4 | -2 | 0 | 2 | 4 | 6 |
| SGO_1237 | 0.373                  | 6.228                | 0.0055  | 0.0159  | 13.500 | 17.000  | 20.1294    | 17.6921  | hypothetical protein SGO_1237                    |                         |    |    |   |   |   |   |
|          |                        |                      |         |         | 15.500 | 15.000  | 22.1215    | 15.0000  |                                                  |                         |    |    |   |   |   |   |
| SGO_1238 | 0.021                  | 7.106                | 0.1464  | 0.7601  | 23.500 | 35.000  | 35.0400    | 36.4248  | ilvE; branched-chain amino acid aminotransferase |                         |    |    |   |   |   |   |
|          |                        |                      |         |         | 24.000 | 32.000  | 34.2526    | 32.0000  |                                                  |                         |    |    |   |   |   |   |
| SGO_1239 | -1.117                 | 6.822                | 0.0003  | 0.0003  | 11.500 | 35.500  | 17.1472    | 36.9452  | parC; DNA topoisomerase IV, A subunit            |                         |    |    |   |   |   |   |
|          |                        |                      |         |         | 13.000 | 40.500  | 18.5535    | 40.5000  |                                                  |                         |    |    |   |   |   |   |
| SGO_1241 |                        | 2.946                |         |         |        | 5.000   |            | 5.2035   | aminoglycoside adenylyltransferase               |                         |    |    |   |   |   |   |
|          |                        |                      |         |         |        | 2.500   |            | 2.5000   |                                                  |                         |    |    |   |   |   |   |
| SGO_1242 | -2.894                 | 7.207                | 0.0175  | 0.0659  |        | 72.500  |            | 75.4514  | lipoprotein, putative                            |                         |    |    |   |   |   |   |
|          |                        |                      |         |         | 6.500  | 63.000  | 9.2768     | 63.0000  |                                                  |                         |    |    |   |   |   |   |
| SGO_1244 | 0.288                  | 5.085                | 0.1646  | 0.8635  | 5.000  | 12.000  | 7.4553     | 12.4885  | hypothetical protein SGO_1244                    |                         |    |    |   |   |   |   |
|          |                        |                      |         |         | 7.000  | 4.000   | 9.9904     | 4.0000   |                                                  |                         |    |    |   |   |   |   |
| SGO_1245 | -1.278                 | 5.846                | 0.0026  | 0.0059  | 6.500  | 17.000  | 9.6919     | 17.6921  | parE; DNA topoisomerase IV, B subunit            |                         |    |    |   |   |   |   |
|          |                        |                      |         |         | 5.000  | 23.000  | 7.1360     | 23.0000  |                                                  |                         |    |    |   |   |   |   |
| SGO_1246 |                        | 3.940                |         |         |        | 8.500   |            | 8.8460   | hypothetical protein SGO_1246                    |                         |    |    |   |   |   |   |
|          |                        |                      |         |         |        | 6.500   |            | 6.5000   |                                                  |                         |    |    |   |   |   |   |
| SGO_1247 |                        | 9.144                |         |         |        | 267.500 |            | 278.3898 | 5'-nucleotidase family protein                   |                         |    |    |   |   |   |   |
|          |                        |                      |         |         |        | 287.500 |            | 287.5000 |                                                  |                         |    |    |   |   |   |   |
| SGO_1248 | 0.664                  | 6.259                | 0.0221  | 0.0871  | 19.000 | 17.500  | 28.3302    | 18.2124  | pyrC; dihydroorotase                             |                         |    |    |   |   |   |   |
|          |                        |                      |         |         | 13.000 | 11.500  | 18.5535    | 11.5000  |                                                  |                         |    |    |   |   |   |   |
| SGO_1250 |                        | 4.412                |         |         |        | 7.000   |            | 7.2850   | ung; uracil-DNA glycosylase                      |                         |    |    |   |   |   |   |
|          |                        |                      |         |         |        | 14.000  |            | 14.0000  |                                                  |                         |    |    |   |   |   |   |
| SGO_1251 |                        | 1.841                |         |         |        | 2.000   |            | 2.0814   | hypothetical protein SGO_1251                    |                         |    |    |   |   |   |   |
|          |                        |                      |         |         |        | 1.500   |            | 1.5000   |                                                  |                         |    |    |   |   |   |   |

- Show detected proteins only
- Show all proteins

Proteins found: 1179

Filter by category:

ABC Transporter

Test

Cutoff

q-Value

.005

p-Value

|             | Signif | Direction | Applies To   |
|-------------|--------|-----------|--------------|
| Red         | yes    | +         | ratios, bars |
| Yellow      | no     | n/a       | bars         |
| Green       | yes    | -         | ratios, bars |
| Pink        | yes    | +         | p-, q-Values |
| Light Green | yes    | -         | p-, q-Values |

Dot Plots Dot Plots

Summary Table

SgFn vs Sg

SgPg vs Sg

SgPgFn vs Sg

SgPg vs SgFn

SgPgFn vs SgFn

SgPgFn vs SgPg

Coverage

| Protein  | SgPg vs Sg             |                      |         |         | Raw     |         | Normalized |          | Description                                                       | Log <sub>2</sub> Ratios |    |    |   |   |   |   |
|----------|------------------------|----------------------|---------|---------|---------|---------|------------|----------|-------------------------------------------------------------------|-------------------------|----|----|---|---|---|---|
|          | Log <sub>2</sub> Ratio | Log <sub>2</sub> Sum | q-Value | p-Value | SgPg    | Sg      | SgPg       | Sg       |                                                                   | -6                      | -4 | -2 | 0 | 2 | 4 | 6 |
| SGO_1252 |                        | 1.322                |         |         |         |         |            |          | integral membrane protein, putative                               |                         |    |    |   |   |   |   |
| SGO_1253 | 0.695                  | 6.813                | 0.0038  | 0.0099  | 22.000  | 17.500  | 32.8034    | 18.2124  | pyrE; orotate phosphoribosyltransferase                           |                         |    |    |   |   |   |   |
|          |                        |                      |         |         | 25.500  | 25.000  | 36.3934    | 25.0000  |                                                                   |                         |    |    |   |   |   |   |
| SGO_1254 | -1.011                 | 5.018                | 0.0244  | 0.0978  |         | 11.500  |            | 11.9682  | pyrF; orotidine 5'-phosphate decarboxylase                        |                         |    |    |   |   |   |   |
|          |                        |                      |         |         | 4.500   | 14.000  | 6.4224     | 14.0000  |                                                                   |                         |    |    |   |   |   |   |
| SGO_1255 | -0.177                 | 3.313                | 0.1403  | 0.7201  |         | 2.000   |            | 2.0814   | pyrd; dihydroorotate dehydrogenase B                              |                         |    |    |   |   |   |   |
|          |                        |                      |         |         | 2.000   | 5.000   | 2.8544     | 5.0000   |                                                                   |                         |    |    |   |   |   |   |
| SGO_1257 | 0.296                  | 5.116                | 0.0467  | 0.2042  | 6.000   | 6.000   | 8.9464     | 6.2443   | probable transcriptional regulator (LysR family)                  |                         |    |    |   |   |   |   |
|          |                        |                      |         |         | 7.000   | 9.500   | 9.9904     | 9.5000   |                                                                   |                         |    |    |   |   |   |   |
| SGO_1258 |                        | 3.718                |         |         |         | 4.000   |            | 4.1628   | NAD-dependent deacetylase (Regulatory protein SIR2-like protein)  |                         |    |    |   |   |   |   |
|          |                        |                      |         |         |         | 9.000   |            | 9.0000   |                                                                   |                         |    |    |   |   |   |   |
| SGO_1260 | 0.150                  | 8.225                | 0.0058  | 0.0171  | 51.000  | 69.000  | 76.0443    | 71.8090  | deoD; purine nucleoside phosphorylase                             |                         |    |    |   |   |   |   |
|          |                        |                      |         |         | 57.000  | 70.000  | 81.3500    | 70.0000  |                                                                   |                         |    |    |   |   |   |   |
| SGO_1261 |                        | 1.807                |         |         |         |         |            |          | glutamine amidotransferase, class I                               |                         |    |    |   |   |   |   |
|          |                        |                      |         |         |         | 3.500   |            | 3.5000   |                                                                   |                         |    |    |   |   |   |   |
| SGO_1263 | 0.330                  | 8.861                | 0.0049  | 0.0137  | 84.000  | 106.500 | 125.2494   | 110.8356 | purine nucleoside phosphorylase I, inosine and guanosine-specific |                         |    |    |   |   |   |   |
|          |                        |                      |         |         | 93.500  | 95.500  | 133.4426   | 95.5000  |                                                                   |                         |    |    |   |   |   |   |
| SGO_1264 | 0.019                  | 10.003               | 0.1710  | 0.9034  | 177.500 | 220.000 | 264.6638   | 228.9561 | deoB; phosphopentomutase                                          |                         |    |    |   |   |   |   |
|          |                        |                      |         |         | 175.500 | 282.000 | 250.4724   | 282.0000 |                                                                   |                         |    |    |   |   |   |   |
| SGO_1265 | 0.958                  | 7.844                | 0.0077  | 0.0238  | 48.000  | 26.000  | 71.5711    | 27.0585  | rpiA; ribose 5-phosphate isomerase                                |                         |    |    |   |   |   |   |
|          |                        |                      |         |         | 54.000  | 54.000  | 77.0684    | 54.0000  |                                                                   |                         |    |    |   |   |   |   |
| SGO_1266 | 0.882                  | 6.214                | 0.0025  | 0.0058  | 18.000  | 12.500  | 26.8391    | 13.0089  | trmE; tRNA modification GTPase TrmE                               |                         |    |    |   |   |   |   |
|          |                        |                      |         |         | 15.000  | 13.000  | 21.4079    | 13.0000  |                                                                   |                         |    |    |   |   |   |   |

- Show detected proteins only
- Show all proteins

Proteins found: 1179

Filter by category:

ABC Transporter

Test

Cutoff

q-Value

.005

p-Value

|             | Signif | Direction | Applies To   |
|-------------|--------|-----------|--------------|
| Red         | yes    | +         | ratios, bars |
| Yellow      | no     | n/a       | bars         |
| Green       | yes    | -         | ratios, bars |
| Pink        | yes    | +         | p-, q-Values |
| Light Green | yes    | -         | p-, q-Values |

Dot Plots Dot Plots

Summary Table

SgFn vs Sg

SgPg vs Sg

SgPgFn vs Sg

SgPg vs SgFn

SgPgFn vs SgFn

SgPgFn vs SgPg

Coverage

| Protein  | SgPg vs Sg             |                      |         |         | Raw    |        | Normalized |          | Description                                          | Log <sub>2</sub> Ratios |    |    |   |   |
|----------|------------------------|----------------------|---------|---------|--------|--------|------------|----------|------------------------------------------------------|-------------------------|----|----|---|---|
|          | Log <sub>2</sub> Ratio | Log <sub>2</sub> Sum | q-Value | p-Value | SgPg   | Sg     | SgPg       | Sg       |                                                      | -6                      | -4 | -2 | 0 | 2 |
| SGO_1267 | -1.825                 | 5.596                | 0.0185  | 0.0707  | 4.000  | 22.000 | 5.9643     | 22.8956  | thioredoxin family protein                           |                         |    |    |   |   |
|          |                        |                      |         |         |        | 19.500 |            | 19.5000  |                                                      |                         |    |    |   |   |
| SGO_1273 | 1.903                  | 8.469                | 0.0001  | 0.0000  | 93.000 | 40.000 | 138.6689   | 41.6284  | rpoD; RNA polymerase sigma factor                    |                         |    |    |   |   |
|          |                        |                      |         |         |        | 98.500 | 33.500     | 140.5786 |                                                      | 33.5000                 |    |    |   |   |
| SGO_1274 | 0.563                  | 4.342                | 0.0490  | 0.2164  | 4.000  | 2.500  | 5.9643     | 2.6018   | dnaG; DNA primase                                    |                         |    |    |   |   |
|          |                        |                      |         |         |        | 4.000  | 6.000      | 5.7088   |                                                      | 6.0000                  |    |    |   |   |
| SGO_1276 | 0.281                  | 7.872                | 0.0142  | 0.0507  | 39.000 | 49.500 | 58.1515    | 51.5151  | rpsU; ribosomal protein S21                          |                         |    |    |   |   |
|          |                        |                      |         |         |        | 49.500 | 54.000     | 70.6461  |                                                      | 54.0000                 |    |    |   |   |
| SGO_1280 |                        | 3.549                |         |         |        | 5.000  |            | 5.2035   | putative membrane-associated Zn-dependent protease   |                         |    |    |   |   |
|          |                        |                      |         |         |        | 6.500  |            | 6.5000   |                                                      |                         |    |    |   |   |
| SGO_1281 | 0.982                  | 5.300                | 0.0047  | 0.0128  | 7.500  | 5.500  | 11.1830    | 5.7239   | penicillinase repressor, putative                    |                         |    |    |   |   |
|          |                        |                      |         |         |        | 10.500 | 7.500      | 14.9855  |                                                      | 7.5000                  |    |    |   |   |
| SGO_1283 | 0.742                  | 8.503                | 0.0003  | 0.0003  | 77.500 | 68.500 | 115.5574   | 71.2886  | oxidoreductase                                       |                         |    |    |   |   |
|          |                        |                      |         |         |        | 78.000 | 64.500     | 111.3211 |                                                      | 64.5000                 |    |    |   |   |
| SGO_1284 | 0.132                  | 6.048                | 0.1080  | 0.5381  | 17.000 | 15.500 | 25.3481    | 16.1310  | thioredoxin-disulfide reductase                      |                         |    |    |   |   |
|          |                        |                      |         |         |        | 7.500  | 14.000     | 10.7040  |                                                      | 14.0000                 |    |    |   |   |
| SGO_1290 |                        | 4.483                |         |         |        | 9.000  |            | 9.3664   | ABC transporter, permease/ATP-binding protein        |                         |    |    |   |   |
|          |                        |                      |         |         |        | 13.000 |            | 13.0000  |                                                      |                         |    |    |   |   |
| SGO_1291 |                        | 3.115                |         |         |        | 4.000  |            | 4.1628   | ABC transporter, permease/ATP-binding protein SP1358 |                         |    |    |   |   |
|          |                        |                      |         |         |        | 4.500  |            | 4.5000   |                                                      |                         |    |    |   |   |
| SGO_1293 | 0.430                  | 7.822                | 0.0034  | 0.0085  | 46.500 | 44.500 | 69.3345    | 46.3116  | asnS; asparaginyl-tRNA synthetase                    |                         |    |    |   |   |
|          |                        |                      |         |         |        | 42.500 | 50.000     | 60.6557  |                                                      | 50.0000                 |    |    |   |   |
| SGO_1297 | 0.992                  | 6.280                | 0.0004  | 0.0005  | 16.500 | 12.000 | 24.6026    | 12.4885  | aspC; aspartate aminotransferase                     |                         |    |    |   |   |
|          |                        |                      |         |         |        | 19.000 | 13.500     | 27.1167  |                                                      | 13.5000                 |    |    |   |   |

- Show detected proteins only
- Show all proteins

Proteins found: 1179

Filter by category:

ABC Transporter

Test

Cutoff

q-Value

.005

p-Value

|             | Signif | Direction | Applies To   |
|-------------|--------|-----------|--------------|
| Red         | yes    | +         | ratios, bars |
| Yellow      | no     | n/a       | bars         |
| Green       | yes    | -         | ratios, bars |
| Pink        | yes    | +         | p-, q-Values |
| Light Green | yes    | -         | p-, q-Values |

Dot Plots Dot Plots

Summary Table

SgFn vs Sg

SgPg vs Sg

SgPgFn vs Sg

SgPg vs SgFn

SgPgFn vs SgFn

SgPgFn vs SgPg

Coverage

| Protein  | SgPg vs Sg             |                      |         |         | Raw    |        | Normalized |         | Description                                        | Log <sub>2</sub> Ratios |    |    |   |   |   |   |
|----------|------------------------|----------------------|---------|---------|--------|--------|------------|---------|----------------------------------------------------|-------------------------|----|----|---|---|---|---|
|          | Log <sub>2</sub> Ratio | Log <sub>2</sub> Sum | q-Value | p-Value | SgPg   | Sg     | SgPg       | Sg      |                                                    | -6                      | -4 | -2 | 0 | 2 | 4 | 6 |
| SGO_1298 |                        | 3.425                |         |         |        | 6.000  |            | 6.2443  | hypothetical protein SGO_1298                      |                         |    |    |   |   |   |   |
|          |                        |                      |         |         |        | 4.500  |            | 4.5000  |                                                    |                         |    |    |   |   |   |   |
| SGO_1305 | -0.420                 | 6.325                | 0.0004  | 0.0004  | 11.500 | 21.500 | 17.1472    | 22.3753 | substrate-binding protein MsmE                     |                         |    |    |   |   |   |   |
|          |                        |                      |         |         | 12.000 | 23.500 | 17.1263    | 23.5000 |                                                    |                         |    |    |   |   |   |   |
| SGO_1312 | 3.727                  | 7.558                | 0.0001  | 0.0000  | 60.000 | 7.000  | 89.4638    | 7.2850  | pepT; peptidase T                                  |                         |    |    |   |   |   |   |
|          |                        |                      |         |         | 60.000 | 6.000  | 85.6316    | 6.0000  |                                                    |                         |    |    |   |   |   |   |
| SGO_1314 |                        | 1.807                |         |         |        |        |            |         | metal binding lipoprotein                          |                         |    |    |   |   |   |   |
|          |                        |                      |         |         |        | 3.500  |            | 3.5000  |                                                    |                         |    |    |   |   |   |   |
| SGO_1315 | 0.030                  | 3.428                | 0.1661  | 0.8725  | 2.000  |        | 2.9821     |         | trmD; tRNA (guanine-N1)-methyltransferase          |                         |    |    |   |   |   |   |
|          |                        |                      |         |         | 3.000  | 3.500  | 4.2816     | 3.5000  |                                                    |                         |    |    |   |   |   |   |
| SGO_1316 | 0.266                  | 4.747                | 0.0494  | 0.2206  | 4.500  | 7.000  | 6.7098     | 7.2850  | 16S rRNA processing protein RimM                   |                         |    |    |   |   |   |   |
|          |                        |                      |         |         | 5.500  | 5.000  | 7.8496     | 5.0000  |                                                    |                         |    |    |   |   |   |   |
| SGO_1323 | 0.691                  | 7.691                | 0.0033  | 0.0082  | 39.500 | 42.500 | 58.8970    | 44.2302 | rpsP; ribosomal protein S16                        |                         |    |    |   |   |   |   |
|          |                        |                      |         |         | 48.000 | 35.000 | 68.5053    | 35.0000 |                                                    |                         |    |    |   |   |   |   |
| SGO_1324 |                        | 5.595                |         |         |        | 20.500 |            | 21.3345 | hypothetical protein SGO_1324                      |                         |    |    |   |   |   |   |
|          |                        |                      |         |         |        | 27.000 |            | 27.0000 |                                                    |                         |    |    |   |   |   |   |
| SGO_1327 | 0.123                  | 6.174                | 0.1330  | 0.6792  | 12.000 | 13.000 | 17.8928    | 13.5292 | HAD-superfamily subfamily IIA hydrolase, TIGR01457 |                         |    |    |   |   |   |   |
|          |                        |                      |         |         | 13.500 | 21.500 | 19.2671    | 21.5000 |                                                    |                         |    |    |   |   |   |   |
| SGO_1328 |                        | 1.585                |         |         |        |        |            |         | hypothetical protein SGO_1328                      |                         |    |    |   |   |   |   |
|          |                        |                      |         |         |        | 3.000  |            | 3.0000  |                                                    |                         |    |    |   |   |   |   |
| SGO_1330 |                        | 3.772                |         |         |        | 4.000  |            | 4.1628  | transporter                                        |                         |    |    |   |   |   |   |
|          |                        |                      |         |         |        | 9.500  |            | 9.5000  |                                                    |                         |    |    |   |   |   |   |
| SGO_1331 |                        | 1.807                |         |         |        |        |            |         | HlyB/MsbA family ABC transporter                   |                         |    |    |   |   |   |   |
|          |                        |                      |         |         |        | 3.500  |            | 3.5000  |                                                    |                         |    |    |   |   |   |   |

- Show detected proteins only
- Show all proteins

Proteins found: 1179

Filter by category:

ABC Transporter

Test

Cutoff

q-Value

.005

p-Value

|             | Signif | Direction | Applies To   |
|-------------|--------|-----------|--------------|
| Red         | yes    | +         | ratios, bars |
| Yellow      | no     | n/a       | bars         |
| Green       | yes    | -         | ratios, bars |
| Pink        | yes    | +         | p-, q-Values |
| Light Green | yes    | -         | p-, q-Values |

Dot Plots Dot Plots

Summary Table

SgFn vs Sg

SgPg vs Sg

SgPgFn vs Sg

SgPg vs SgFn

SgPgFn vs SgFn

SgPgFn vs SgPg

Coverage

| Protein  | SgPg vs Sg             |                      |         |         | Raw     |         | Normalized |          | Description                                       | Log <sub>2</sub> Ratios |    |    |   |   |   |   |
|----------|------------------------|----------------------|---------|---------|---------|---------|------------|----------|---------------------------------------------------|-------------------------|----|----|---|---|---|---|
|          | Log <sub>2</sub> Ratio | Log <sub>2</sub> Sum | q-Value | p-Value | SgPg    | Sg      | SgPg       | Sg       |                                                   | -6                      | -4 | -2 | 0 | 2 | 4 | 6 |
| SGO_1336 | 0.050                  | 6.164                | 0.0802  | 0.3879  | 13.000  | 17.000  | 19.3838    | 17.6921  | pcrA; ATP-dependent DNA helicase PcrA             |                         |    |    |   |   |   |   |
|          |                        |                      |         |         | 12.000  | 17.500  | 17.1263    | 17.5000  |                                                   |                         |    |    |   |   |   |   |
| SGO_1337 |                        | 1.585                |         |         |         |         |            |          | cation efflux family protein                      |                         |    |    |   |   |   |   |
|          |                        |                      |         |         |         | 3.000   |            | 3.0000   |                                                   |                         |    |    |   |   |   |   |
| SGO_1338 | -3.036                 | 5.648                | 0.0253  | 0.1018  |         | 19.500  |            | 20.2938  | Signal peptidase I                                |                         |    |    |   |   |   |   |
|          |                        |                      |         |         | 2.000   | 27.000  | 2.8544     | 27.0000  |                                                   |                         |    |    |   |   |   |   |
| SGO_1339 | 1.066                  | 11.826               | 0.0001  | 0.0001  | 803.500 | 551.000 | 1198.0698  | 573.4310 | pyk; pyruvate kinase                              |                         |    |    |   |   |   |   |
|          |                        |                      |         |         | 882.500 | 600.000 | 1259.4982  | 600.0000 |                                                   |                         |    |    |   |   |   |   |
| SGO_1340 | 0.758                  | 10.195               | 0.0001  | 0.0000  | 246.000 | 213.500 | 366.8017   | 222.1915 | Phosphofructokinase                               |                         |    |    |   |   |   |   |
|          |                        |                      |         |         | 259.000 | 213.500 | 369.6431   | 213.5000 |                                                   |                         |    |    |   |   |   |   |
| SGO_1341 | -1.076                 | 4.546                | 0.0154  | 0.0566  | 3.000   | 9.500   | 4.4732     | 9.8867   | dnaE; DNA-directed DNA polymerase III alpha chain |                         |    |    |   |   |   |   |
|          |                        |                      |         |         |         | 9.000   |            | 9.0000   |                                                   |                         |    |    |   |   |   |   |
| SGO_1342 | -1.281                 | 10.262               | 0.0001  | 0.0001  | 128.000 | 423.500 | 190.8562   | 440.7405 | ABC transporter, ATP-binding protein SP1715       |                         |    |    |   |   |   |   |
|          |                        |                      |         |         | 117.500 | 429.000 | 167.6952   | 429.0000 |                                                   |                         |    |    |   |   |   |   |
| SGO_1343 | -1.773                 | 5.547                | 0.0085  | 0.0271  | 4.000   | 19.000  | 5.9643     | 19.7735  | ABC transporter, ATP-binding protein SP1715       |                         |    |    |   |   |   |   |
|          |                        |                      |         |         |         | 21.000  |            | 21.0000  |                                                   |                         |    |    |   |   |   |   |
| SGO_1347 |                        | 6.152                |         |         |         | 39.500  |            | 41.1080  | membrane associated lipoprotein                   |                         |    |    |   |   |   |   |
|          |                        |                      |         |         |         | 30.000  |            | 30.0000  |                                                   |                         |    |    |   |   |   |   |
| SGO_1355 |                        | 3.483                |         |         |         | 4.500   |            | 4.6832   | lipoprotein, putative                             |                         |    |    |   |   |   |   |
|          |                        |                      |         |         |         | 6.500   |            | 6.5000   |                                                   |                         |    |    |   |   |   |   |
| SGO_1360 |                        | 2.832                |         |         |         | 3.000   |            | 3.1221   | ABC transporter domain protein                    |                         |    |    |   |   |   |   |
|          |                        |                      |         |         |         | 4.000   |            | 4.0000   |                                                   |                         |    |    |   |   |   |   |
| SGO_1361 |                        | 2.700                |         |         |         |         |            |          | ADP-ribosylhydrolase                              |                         |    |    |   |   |   |   |
|          |                        |                      |         |         |         | 6.500   |            | 6.5000   |                                                   |                         |    |    |   |   |   |   |

- Show detected proteins only
- Show all proteins

Proteins found: 1179

Filter by category:

ABC Transporter

Test

Cutoff

q-Value

.005

p-Value

|             | Signif | Direction | Applies To   |
|-------------|--------|-----------|--------------|
| Red         | yes    | +         | ratios, bars |
| Yellow      | no     | n/a       | bars         |
| Green       | yes    | -         | ratios, bars |
| Pink        | yes    | +         | p-, q-Values |
| Light Green | yes    | -         | p-, q-Values |

Dot Plots Dot Plots

Summary Table

SgFn vs Sg

SgPg vs Sg

SgPgFn vs Sg

SgPg vs SgFn

SgPgFn vs SgFn

SgPgFn vs SgPg

Coverage

| Protein  | SgPg vs Sg             |                      |         |         | Raw    |        | Normalized |         | Description                                         | Log <sub>2</sub> Ratios |    |    |   |   |   |
|----------|------------------------|----------------------|---------|---------|--------|--------|------------|---------|-----------------------------------------------------|-------------------------|----|----|---|---|---|
|          | Log <sub>2</sub> Ratio | Log <sub>2</sub> Sum | q-Value | p-Value | SgPg   | Sg     | SgPg       | Sg      |                                                     | -6                      | -4 | -2 | 0 | 2 | 4 |
| SGO_1364 | -0.053                 | 6.770                | 0.1267  | 0.6436  | 17.500 | 22.500 | 26.0936    | 23.4160 | rumA-2; 23S rRNA (uracil-5-)-methyltransferase RumA |                         |    |    |   |   |   |
|          |                        |                      |         |         | 19.000 | 32.500 | 27.1167    | 32.5000 |                                                     |                         |    |    |   |   |   |
| SGO_1365 | -3.071                 | 6.289                | 0.0001  | 0.0001  | 4.000  | 33.500 | 5.9643     | 34.8638 | transcription regulator yrfE                        |                         |    |    |   |   |   |
|          |                        |                      |         |         | 2.000  | 34.500 | 2.8544     | 34.5000 |                                                     |                         |    |    |   |   |   |
| SGO_1366 |                        | 3.719                |         |         | 5.000  |        | 7.4553     |         | pheA; prephenate dehydratase                        |                         |    |    |   |   |   |
|          |                        |                      |         |         | 4.000  |        | 5.7088     |         |                                                     |                         |    |    |   |   |   |
| SGO_1367 | -0.645                 | 4.492                | 0.0027  | 0.0065  | 3.000  | 6.000  | 4.4732     | 6.2443  | aroK; shikimate kinase                              |                         |    |    |   |   |   |
|          |                        |                      |         |         | 3.000  | 7.500  | 4.2816     | 7.5000  |                                                     |                         |    |    |   |   |   |
| SGO_1368 | 1.405                  | 4.704                | 0.0175  | 0.0655  | 6.000  | 1.500  | 8.9464     | 1.5611  | aroA; 3-phosphoshikimate 1-carboxyvinyltransferase  |                         |    |    |   |   |   |
|          |                        |                      |         |         | 6.000  | 7.000  | 8.5632     | 7.0000  |                                                     |                         |    |    |   |   |   |
| SGO_1369 | -0.018                 | 5.905                | 0.1710  | 0.9038  | 9.000  | 14.000 | 13.4196    | 14.5699 | L-2-hydroxyisocaproate dehydrogenase                |                         |    |    |   |   |   |
|          |                        |                      |         |         | 11.500 | 15.500 | 16.4127    | 15.5000 |                                                     |                         |    |    |   |   |   |
| SGO_1370 | 1.245                  | 6.740                | 0.0010  | 0.0015  | 27.500 | 15.500 | 41.0043    | 16.1310 | Protein of unknown function (DUF964) superfamily    |                         |    |    |   |   |   |
|          |                        |                      |         |         | 24.000 | 15.500 | 34.2526    | 15.5000 |                                                     |                         |    |    |   |   |   |
| SGO_1372 | 1.553                  | 5.640                | 0.0003  | 0.0002  | 12.000 | 5.500  | 17.8928    | 5.7239  | aroC; chorismate synthase                           |                         |    |    |   |   |   |
|          |                        |                      |         |         | 13.500 | 7.000  | 19.2671    | 7.0000  |                                                     |                         |    |    |   |   |   |
| SGO_1373 | 0.379                  | 5.146                | 0.0473  | 0.2080  | 6.500  | 5.500  | 9.6919     | 5.7239  | aroB; 3-dehydroquinate synthase                     |                         |    |    |   |   |   |
|          |                        |                      |         |         | 7.000  | 10.000 | 9.9904     | 10.0000 |                                                     |                         |    |    |   |   |   |
| SGO_1374 | 0.232                  | 4.333                | 0.0655  | 0.3054  | 4.500  | 4.000  | 6.7098     | 4.1628  | aroE; shikimate 5-dehydrogenase                     |                         |    |    |   |   |   |
|          |                        |                      |         |         | 3.000  | 5.000  | 4.2816     | 5.0000  |                                                     |                         |    |    |   |   |   |
| SGO_1375 | 0.563                  | 6.044                | 0.0214  | 0.0838  | 16.000 | 11.000 | 23.8570    | 11.4478 | aroD; 3-dehydroquinate dehydratase, type I          |                         |    |    |   |   |   |
|          |                        |                      |         |         | 11.000 | 15.000 | 15.6991    | 15.0000 |                                                     |                         |    |    |   |   |   |
| SGO_1376 |                        | 3.982                |         |         |        | 7.500  |            | 7.8053  | Methyltransferase                                   |                         |    |    |   |   |   |
|          |                        |                      |         |         |        | 8.000  |            | 8.0000  |                                                     |                         |    |    |   |   |   |

- Show detected proteins only
- Show all proteins

Proteins found: 1179

Filter by category: ABC Transporter

Test

Cutoff

q-Value

.005

p-Value

| Signif | Direction | Applies To   |
|--------|-----------|--------------|
| yes    | +         | ratios, bars |
| no     | n/a       | bars         |
| yes    | -         | ratios, bars |
| yes    | +         | p-, q-Values |
| yes    | -         | p-, q-Values |

Dot Plots Dot Plots



Summary Table

SgFn vs Sg

SgPg vs Sg

SgPgFn vs Sg

SgPg vs SgFn

SgPgFn vs SgFn

SgPgFn vs SgPg

Coverage

| Protein  | SgPg vs Sg             |                      |         |         | Raw     |         | Normalized |          | Description                                                                   | Log <sub>2</sub> Ratios |    |    |   |   |
|----------|------------------------|----------------------|---------|---------|---------|---------|------------|----------|-------------------------------------------------------------------------------|-------------------------|----|----|---|---|
|          | Log <sub>2</sub> Ratio | Log <sub>2</sub> Sum | q-Value | p-Value | SgPg    | Sg      | SgPg       | Sg       |                                                                               | -6                      | -4 | -2 | 0 | 2 |
| SGO_1377 | -2.205                 | 8.142                | 0.0003  | 0.0002  | 16.500  | 105.000 | 24.6026    | 109.2745 | sulfatase                                                                     |                         |    |    |   |   |
|          |                        |                      |         |         | 18.000  | 123.000 | 25.6895    | 123.0000 |                                                                               |                         |    |    |   |   |
| SGO_1381 | -0.506                 | 6.495                | 0.0150  | 0.0546  | 10.000  | 24.000  | 14.9106    | 24.9770  | csn1; CRISPR-associated protein, Csn1 family                                  |                         |    |    |   |   |
|          |                        |                      |         |         | 16.000  | 27.500  | 22.8351    | 27.5000  |                                                                               |                         |    |    |   |   |
| SGO_1383 | 0.692                  | 9.044                | 0.0016  | 0.0032  | 102.000 | 91.500  | 152.0885   | 95.2249  | rplS; ribosomal protein L19                                                   |                         |    |    |   |   |
|          |                        |                      |         |         | 122.000 | 106.500 | 174.1176   | 106.5000 |                                                                               |                         |    |    |   |   |
| SGO_1386 | 1.156                  | 4.082                | 0.0635  | 0.2939  | 6.000   |         | 8.9464     |          | chorismate mutase                                                             |                         |    |    |   |   |
|          |                        |                      |         |         | 3.500   | 3.000   | 4.9952     | 3.0000   |                                                                               |                         |    |    |   |   |
| SGO_1388 |                        | 4.827                |         |         |         | 9.500   |            | 9.8867   | pula-1; pullulanase, type I                                                   |                         |    |    |   |   |
|          |                        |                      |         |         |         | 18.500  |            | 18.5000  |                                                                               |                         |    |    |   |   |
| SGO_1389 |                        | 5.417                |         |         |         | 18.000  |            | 18.7328  | conserved hypothetical protein TIGR00147                                      |                         |    |    |   |   |
|          |                        |                      |         |         |         | 24.000  |            | 24.0000  |                                                                               |                         |    |    |   |   |
| SGO_1390 | -0.884                 | 5.960                | 0.0007  | 0.0009  | 8.000   | 20.000  | 11.9285    | 20.8142  | ligA; DNA ligase, NAD-dependent                                               |                         |    |    |   |   |
|          |                        |                      |         |         | 7.000   | 19.500  | 9.9904     | 19.5000  |                                                                               |                         |    |    |   |   |
| SGO_1394 |                        | 4.059                |         |         | 4.000   |         | 5.9643     |          | hypothetical protein SGO_1394                                                 |                         |    |    |   |   |
|          |                        |                      |         |         | 7.500   |         | 10.7040    |          |                                                                               |                         |    |    |   |   |
| SGO_1397 | 0.382                  | 6.937                | 0.0390  | 0.1674  | 25.500  | 20.000  | 38.0221    | 20.8142  | map; methionine aminopeptidase, type I                                        |                         |    |    |   |   |
|          |                        |                      |         |         | 21.500  | 33.000  | 30.6847    | 33.0000  |                                                                               |                         |    |    |   |   |
| SGO_1398 | -1.419                 | 5.593                | 0.0015  | 0.0030  | 5.000   | 15.000  | 7.4553     | 15.6106  | hypothetical protein SGO_1398                                                 |                         |    |    |   |   |
|          |                        |                      |         |         | 4.000   | 19.500  | 5.7088     | 19.5000  |                                                                               |                         |    |    |   |   |
| SGO_1400 | -0.556                 | 6.098                | 0.0023  | 0.0052  | 10.000  | 18.500  | 14.9106    | 19.2531  | murA-2; UDP-N-acetylglucosamine 1-carboxyvinyltransferase                     |                         |    |    |   |   |
|          |                        |                      |         |         | 9.000   | 21.500  | 12.8447    | 21.5000  |                                                                               |                         |    |    |   |   |
| SGO_1405 |                        | 1.835                |         |         |         |         |            |          | hisA; phosphoribosylformimino-5-aminoimidazole carboxamide ribotide isomerase |                         |    |    |   |   |
|          |                        |                      |         |         | 2.500   |         | 3.5680     |          |                                                                               |                         |    |    |   |   |

- Show detected proteins only
- Show all proteins

Proteins found:  
1179

Filter by category:  
ABC Transporter

**Test**      **Cutoff**

q-Value     

p-Value

| Signif | Direction | Applies To   |
|--------|-----------|--------------|
| yes    | +         | ratios, bars |
| no     | n/a       | bars         |
| yes    | -         | ratios, bars |
| yes    | +         | p-, q-Values |
| yes    | -         | p-, q-Values |

Dot Plots  Dot Plots

Summary Table

SgFn vs Sg

SgPg vs Sg

SgPgFn vs Sg

SgPg vs SgFn

SgPgFn vs SgFn

SgPgFn vs SgPg

Coverage

| Protein  | SgPg vs Sg             |                      |         |         | Raw      |          | Normalized |           | Description                                                                  | Log <sub>2</sub> Ratios |    |    |   |   |   |   |
|----------|------------------------|----------------------|---------|---------|----------|----------|------------|-----------|------------------------------------------------------------------------------|-------------------------|----|----|---|---|---|---|
|          | Log <sub>2</sub> Ratio | Log <sub>2</sub> Sum | q-Value | p-Value | SgPg     | Sg       | SgPg       | Sg        |                                                                              | -6                      | -4 | -2 | 0 | 2 | 4 | 6 |
| SGO_1413 | -0.695                 | 5.167                | 0.0323  | 0.1348  | 4.500    | 7.000    | 6.7098     | 7.2850    | first chain of major exonuclease RexA                                        |                         |    |    |   |   |   |   |
|          |                        |                      |         |         | 4.500    | 15.500   | 6.4224     | 15.5000   |                                                                              |                         |    |    |   |   |   |   |
| SGO_1414 | -0.773                 | 4.582                | 0.0176  | 0.0664  | 2.500    | 5.500    | 3.7277     | 5.7239    | rexB; putative exonuclease RexB                                              |                         |    |    |   |   |   |   |
|          |                        |                      |         |         | 3.500    | 9.500    | 4.9952     | 9.5000    |                                                                              |                         |    |    |   |   |   |   |
| SGO_1415 |                        | 2.481                |         |         |          | 2.000    |            | 2.0814    | LPXTG cell wall surface protein, X-prolyl dipeptidylaminopeptidase, putative |                         |    |    |   |   |   |   |
|          |                        |                      |         |         |          | 3.500    |            | 3.5000    |                                                                              |                         |    |    |   |   |   |   |
| SGO_1416 |                        | 1.585                |         |         |          |          |            |           | putative histidine kinase                                                    |                         |    |    |   |   |   |   |
|          |                        |                      |         |         |          | 3.000    |            | 3.0000    |                                                                              |                         |    |    |   |   |   |   |
| SGO_1417 |                        | 2.973                |         |         |          |          |            |           | response regulator protein                                                   |                         |    |    |   |   |   |   |
|          |                        |                      |         |         | 5.500    |          | 7.8496     |           |                                                                              |                         |    |    |   |   |   |   |
| SGO_1422 | -0.278                 | 6.778                | 0.0007  | 0.0009  | 17.000   | 28.500   | 25.3481    | 29.6602   | hypothetical protein SGO_1422                                                |                         |    |    |   |   |   |   |
|          |                        |                      |         |         | 17.000   | 30.500   | 24.2623    | 30.5000   |                                                                              |                         |    |    |   |   |   |   |
| SGO_1426 | 1.751                  | 14.510               | 0.0001  | 0.0000  | 5900.500 | 2771.500 | 8798.0219  | 2884.3267 | eno; enolase                                                                 |                         |    |    |   |   |   |   |
|          |                        |                      |         |         | 6433.500 | 2470.500 | 9181.8488  | 2470.5000 |                                                                              |                         |    |    |   |   |   |   |
| SGO_1431 | -1.476                 | 10.366               | 0.0048  | 0.0136  | 117.500  | 570.000  | 175.2000   | 593.2045  | EzrA; Septation ring formation regulator ezrA                                |                         |    |    |   |   |   |   |
|          |                        |                      |         |         | 117.500  | 383.500  | 167.6952   | 383.5000  |                                                                              |                         |    |    |   |   |   |   |
| SGO_1432 | 0.327                  | 7.630                | 0.0534  | 0.2414  | 31.000   | 33.500   | 46.2230    | 34.8638   | gyrB; DNA gyrase, B subunit                                                  |                         |    |    |   |   |   |   |
|          |                        |                      |         |         | 44.500   | 53.500   | 63.5101    | 53.5000   |                                                                              |                         |    |    |   |   |   |   |
| SGO_1434 | 1.419                  | 4.025                | 0.0515  | 0.2317  | 3.500    |          | 5.2187     |           | thiJ; 4-methyl-5(beta-hydroxyethyl)-thiazole monophosphate synthesis protein |                         |    |    |   |   |   |   |
|          |                        |                      |         |         | 6.000    | 2.500    | 8.5632     | 2.5000    |                                                                              |                         |    |    |   |   |   |   |
| SGO_1437 |                        | 3.669                |         |         |          | 5.500    |            | 5.7239    | DnaQ family exonuclease/DinG family helicase, putative                       |                         |    |    |   |   |   |   |
|          |                        |                      |         |         |          | 7.000    |            | 7.0000    |                                                                              |                         |    |    |   |   |   |   |
| SGO_1439 | -1.888                 | 7.169                | 0.0001  | 0.0000  | 11.000   | 55.500   | 16.4017    | 57.7594   | ftsX; cell division protein FtsX                                             |                         |    |    |   |   |   |   |
|          |                        |                      |         |         | 10.000   | 55.500   | 14.2719    | 55.5000   |                                                                              |                         |    |    |   |   |   |   |

- Show detected proteins only
- Show all proteins

Proteins found: 1179

Filter by category:  
ABC Transporter

Test

Cutoff

q-Value

.005

p-Value

|             | Signif | Direction | Applies To   |
|-------------|--------|-----------|--------------|
| Red         | yes    | +         | ratios, bars |
| Yellow      | no     | n/a       | bars         |
| Green       | yes    | -         | ratios, bars |
| Pink        | yes    | +         | p-, q-Values |
| Light Green | yes    | -         | p-, q-Values |

Dot Plots Dot Plots

Summary Table

SgFn vs Sg

SgPg vs Sg

SgPgFn vs Sg

SgPg vs SgFn

SgPgFn vs SgFn

SgPgFn vs SgPg

Coverage

| Protein  | SgPg vs Sg             |                      |         |         | Raw     |         | Normalized |          | Description                                                      | Log <sub>2</sub> Ratios |    |    |   |   |   |   |
|----------|------------------------|----------------------|---------|---------|---------|---------|------------|----------|------------------------------------------------------------------|-------------------------|----|----|---|---|---|---|
|          | Log <sub>2</sub> Ratio | Log <sub>2</sub> Sum | q-Value | p-Value | SgPg    | Sg      | SgPg       | Sg       |                                                                  | -6                      | -4 | -2 | 0 | 2 | 4 | 6 |
| SGO_1440 | -1.350                 | 8.204                | 0.0001  | 0.0000  | 27.000  | 104.500 | 40.2587    | 108.7542 | cell-division ATP-binding protein FtsE                           |                         |    |    |   |   |   |   |
|          |                        |                      |         |         | 30.000  | 103.000 | 42.8158    | 103.0000 |                                                                  |                         |    |    |   |   |   |   |
| SGO_1441 | 0.860                  | 6.328                | 0.0120  | 0.0413  | 13.500  | 14.500  | 20.1294    | 15.0903  | prfB; peptide chain release factor 2                             |                         |    |    |   |   |   |   |
|          |                        |                      |         |         | 22.500  | 13.000  | 32.1119    | 13.0000  |                                                                  |                         |    |    |   |   |   |   |
| SGO_1446 | 0.547                  | 6.652                | 0.0188  | 0.0726  | 18.500  | 15.000  | 27.5847    | 15.6106  | murF; UDP-N-acetylmuramoyl-tripeptide--D-alanyl-D-alanine ligase |                         |    |    |   |   |   |   |
|          |                        |                      |         |         | 22.000  | 26.000  | 31.3983    | 26.0000  |                                                                  |                         |    |    |   |   |   |   |
| SGO_1447 | 0.694                  | 7.021                | 0.0026  | 0.0059  | 29.500  | 23.500  | 43.9864    | 24.4567  | ddlA; D-Ala-D-Ala ligase                                         |                         |    |    |   |   |   |   |
|          |                        |                      |         |         | 25.500  | 25.000  | 36.3934    | 25.0000  |                                                                  |                         |    |    |   |   |   |   |
| SGO_1449 | -2.494                 | 7.277                | 0.0006  | 0.0007  | 7.500   | 69.500  | 11.1830    | 72.3293  | pbp2b; penicillin-binding protein 2B                             |                         |    |    |   |   |   |   |
|          |                        |                      |         |         | 8.500   | 59.500  | 12.1311    | 59.5000  |                                                                  |                         |    |    |   |   |   |   |
| SGO_1450 | 0.312                  | 5.654                | 0.1740  | 0.9221  | 10.500  | 5.000   | 15.6562    | 5.2035   | hypothetical protein SGO_1450                                    |                         |    |    |   |   |   |   |
|          |                        |                      |         |         | 7.000   | 19.500  | 9.9904     | 19.5000  |                                                                  |                         |    |    |   |   |   |   |
| SGO_1451 | 0.844                  | 7.426                | 0.0011  | 0.0018  | 37.000  | 33.500  | 55.1694    | 34.8638  | frr; ribosome recycling factor                                   |                         |    |    |   |   |   |   |
|          |                        |                      |         |         | 38.500  | 27.000  | 54.9469    | 27.0000  |                                                                  |                         |    |    |   |   |   |   |
| SGO_1452 | 1.012                  | 7.403                | 0.0077  | 0.0237  | 45.500  | 30.500  | 67.8434    | 31.7416  | pyrH; uridylyate kinase                                          |                         |    |    |   |   |   |   |
|          |                        |                      |         |         | 32.000  | 24.000  | 45.6702    | 24.0000  |                                                                  |                         |    |    |   |   |   |   |
| SGO_1453 |                        | 4.100                |         |         | 11.500  |         | 17.1472    |          | glycosyl transferase, family 8 SP1766                            |                         |    |    |   |   |   |   |
| SGO_1454 |                        | 4.989                |         |         |         | 18.500  |            | 19.2531  | amino acid permease family protein                               |                         |    |    |   |   |   |   |
|          |                        |                      |         |         |         | 12.500  |            | 12.5000  |                                                                  |                         |    |    |   |   |   |   |
| SGO_1455 | 1.547                  | 9.960                | 0.0027  | 0.0064  | 208.000 | 129.500 | 310.1413   | 134.7719 | rplA; ribosomal protein L1                                       |                         |    |    |   |   |   |   |
|          |                        |                      |         |         | 304.000 | 117.000 | 433.8668   | 117.0000 |                                                                  |                         |    |    |   |   |   |   |
| SGO_1456 | 0.563                  | 7.956                | 0.0124  | 0.0428  | 41.500  | 46.500  | 61.8791    | 48.3930  | rplK; ribosomal protein L11                                      |                         |    |    |   |   |   |   |
|          |                        |                      |         |         | 61.000  | 51.000  | 87.0588    | 51.0000  |                                                                  |                         |    |    |   |   |   |   |

- Show detected proteins only
- Show all proteins

Proteins found: 1179

Filter by category:

ABC Transporter

Test

Cutoff

q-Value

.005

p-Value

|             | Signif | Direction | Applies To   |
|-------------|--------|-----------|--------------|
| Red         | yes    | +         | ratios, bars |
| Yellow      | no     | n/a       | bars         |
| Green       | yes    | -         | ratios, bars |
| Pink        | yes    | +         | p-, q-Values |
| Light Green | yes    | -         | p-, q-Values |

Dot Plots Dot Plots

Summary Table

SgFn vs Sg

SgPg vs Sg

SgPgFn vs Sg

SgPg vs SgFn

SgPgFn vs SgFn

SgPgFn vs SgPg

Coverage

| Protein  | SgPg vs Sg             |                      |         |         | Raw    |        | Normalized |         | Description                                        | Log <sub>2</sub> Ratios |    |    |   |   |
|----------|------------------------|----------------------|---------|---------|--------|--------|------------|---------|----------------------------------------------------|-------------------------|----|----|---|---|
|          | Log <sub>2</sub> Ratio | Log <sub>2</sub> Sum | q-Value | p-Value | SgPg   | Sg     | SgPg       | Sg      |                                                    | -6                      | -4 | -2 | 0 | 2 |
| SGO_1458 | -3.777                 | 7.025                | 0.0025  | 0.0057  | 3.500  | 71.500 | 5.2187     | 74.4107 | aha1; cation-transporting ATPase yfgQ              |                         |    |    |   |   |
|          |                        |                      |         |         | 2.500  | 47.000 | 3.5680     | 47.0000 |                                                    |                         |    |    |   |   |
| SGO_1459 |                        | 1.161                |         |         | 1.500  |        | 2.2366     |         | glyoxylase family protein                          |                         |    |    |   |   |
|          |                        |                      |         |         |        |        |            |         |                                                    |                         |    |    |   |   |
| SGO_1460 | -1.693                 | 7.097                | 0.0017  | 0.0034  | 11.000 | 57.500 | 16.4017    | 59.8408 | DNA translocase ftsK                               |                         |    |    |   |   |
|          |                        |                      |         |         | 11.000 | 45.000 | 15.6991    | 45.0000 |                                                    |                         |    |    |   |   |
| SGO_1463 | -1.582                 | 7.422                | 0.0003  | 0.0002  | 16.000 | 59.500 | 23.8570    | 61.9222 | peptidyl-prolyl cis-trans isomerase                |                         |    |    |   |   |
|          |                        |                      |         |         | 13.500 | 66.500 | 19.2671    | 66.5000 |                                                    |                         |    |    |   |   |
| SGO_1464 | -1.171                 | 7.558                | 0.0021  | 0.0045  | 20.000 | 55.000 | 29.8213    | 57.2390 | uncharacterized probable metal-binding protein     |                         |    |    |   |   |
|          |                        |                      |         |         | 19.500 | 73.500 | 27.8303    | 73.5000 |                                                    |                         |    |    |   |   |
| SGO_1465 | 0.016                  | 7.297                | 0.1771  | 0.9448  | 30.000 | 32.000 | 44.7319    | 33.3027 | ABC transporter, ATP-binding protein SP0770        |                         |    |    |   |   |
|          |                        |                      |         |         | 24.000 | 45.000 | 34.2526    | 45.0000 |                                                    |                         |    |    |   |   |
| SGO_1466 | -0.616                 | 5.754                | 0.0142  | 0.0510  | 8.000  | 18.500 | 11.9285    | 19.2531 | MTA/SAH nucleosidase                               |                         |    |    |   |   |
|          |                        |                      |         |         | 6.500  | 13.500 | 9.2768     | 13.5000 |                                                    |                         |    |    |   |   |
| SGO_1468 |                        | 1.585                |         |         |        |        |            |         | MutT/nudix family protein                          |                         |    |    |   |   |
|          |                        |                      |         |         |        | 3.000  |            | 3.0000  |                                                    |                         |    |    |   |   |
| SGO_1469 | 0.365                  | 7.880                | 0.0011  | 0.0018  | 43.000 | 48.500 | 64.1157    | 50.4744 | glmU; UDP-N-acetylglucosamine pyrophosphorylase    |                         |    |    |   |   |
|          |                        |                      |         |         | 48.000 | 52.500 | 68.5053    | 52.5000 |                                                    |                         |    |    |   |   |
| SGO_1472 | 0.998                  | 4.385                | 0.0738  | 0.3513  | 7.500  |        | 11.1830    |         | acetyltransferase, GNAT family                     |                         |    |    |   |   |
|          |                        |                      |         |         | 4.000  | 4.000  | 5.7088     | 4.0000  |                                                    |                         |    |    |   |   |
| SGO_1475 |                        | 4.513                |         |         |        | 8.000  |            | 8.3257  | lipoprotein, putative                              |                         |    |    |   |   |
|          |                        |                      |         |         |        | 14.500 |            | 14.5000 |                                                    |                         |    |    |   |   |
| SGO_1483 |                        | 1.643                |         |         |        | 3.000  |            | 3.1221  | ABC transporter, permease protein, probable SP0913 |                         |    |    |   |   |
|          |                        |                      |         |         |        |        |            |         |                                                    |                         |    |    |   |   |

- Show detected proteins only
- Show all proteins

Proteins found: 1179

Filter by category:

ABC Transporter

Test

Cutoff

q-Value

.005

p-Value

|  | Signif | Direction | Applies To   |
|--|--------|-----------|--------------|
|  | yes    | +         | ratios, bars |
|  | no     | n/a       | bars         |
|  | yes    | -         | ratios, bars |
|  | yes    | +         | p-, q-Values |
|  | yes    | -         | p-, q-Values |

Dot Plots Dot Plots

Summary Table

SgFn vs Sg

SgPg vs Sg

SgPgFn vs Sg

SgPg vs SgFn

SgPgFn vs SgFn

SgPgFn vs SgPg

Coverage

| Protein  | SgPg vs Sg             |                      |         |         | Raw    |        | Normalized |         | Description                                                | Log <sub>2</sub> Ratios |    |    |   |   |   |   |
|----------|------------------------|----------------------|---------|---------|--------|--------|------------|---------|------------------------------------------------------------|-------------------------|----|----|---|---|---|---|
|          | Log <sub>2</sub> Ratio | Log <sub>2</sub> Sum | q-Value | p-Value | SgPg   | Sg     | SgPg       | Sg      |                                                            | -6                      | -4 | -2 | 0 | 2 | 4 | 6 |
| SGO_1484 |                        | 3.135                |         |         | 3.500  |        | 5.2187     |         | ABC transporter, ATP-binding protein                       |                         |    |    |   |   |   |   |
|          |                        |                      |         |         | 2.500  |        | 3.5680     |         |                                                            |                         |    |    |   |   |   |   |
| SGO_1486 |                        | 1.322                |         |         |        |        |            |         | beta-galactosidase                                         |                         |    |    |   |   |   |   |
|          |                        |                      |         |         |        | 2.500  |            | 2.5000  |                                                            |                         |    |    |   |   |   |   |
| SGO_1487 | -3.730                 | 6.626                | 0.0185  | 0.0708  |        | 41.000 |            | 42.6691 | LPXTG cell wall surface protein, Cna protein B-type domain |                         |    |    |   |   |   |   |
|          |                        |                      |         |         | 2.500  | 52.500 | 3.5680     | 52.5000 |                                                            |                         |    |    |   |   |   |   |
| SGO_1493 | -2.649                 | 6.864                | 0.0185  | 0.0704  |        | 47.000 |            | 48.9134 | hypothetical protein SGO_1493                              |                         |    |    |   |   |   |   |
|          |                        |                      |         |         | 6.000  | 59.000 | 8.5632     | 59.0000 |                                                            |                         |    |    |   |   |   |   |
| SGO_1495 |                        | 4.523                |         |         |        | 12.000 |            | 12.4885 | putative transcriptional regulator                         |                         |    |    |   |   |   |   |
|          |                        |                      |         |         |        | 10.500 |            | 10.5000 |                                                            |                         |    |    |   |   |   |   |
| SGO_1498 |                        | 1.643                |         |         |        | 3.000  |            | 3.1221  | ABC transporter, permease protein, probable SP0913         |                         |    |    |   |   |   |   |
|          |                        |                      |         |         |        |        |            |         |                                                            |                         |    |    |   |   |   |   |
| SGO_1504 |                        | 3.785                |         |         |        | 7.000  |            | 7.2850  | histidine kinase                                           |                         |    |    |   |   |   |   |
|          |                        |                      |         |         |        | 6.500  |            | 6.5000  |                                                            |                         |    |    |   |   |   |   |
| SGO_1507 |                        | 5.334                |         |         |        | 20.500 |            | 21.3345 | hypothetical protein SGO_1507                              |                         |    |    |   |   |   |   |
|          |                        |                      |         |         |        | 19.000 |            | 19.0000 |                                                            |                         |    |    |   |   |   |   |
| SGO_1512 | 0.741                  | 3.060                |         |         | 3.500  | 3.000  | 5.2187     | 3.1221  | lacG; 6-phospho-beta-galactosidase                         |                         |    |    |   |   |   |   |
|          |                        |                      |         |         |        |        |            |         |                                                            |                         |    |    |   |   |   |   |
| SGO_1513 |                        | 1.807                |         |         |        |        |            |         | lacE; PTS system, lactose-specific IIBC component          |                         |    |    |   |   |   |   |
|          |                        |                      |         |         |        | 3.500  |            | 3.5000  |                                                            |                         |    |    |   |   |   |   |
| SGO_1516 | 1.216                  | 6.199                | 0.0050  | 0.0144  | 14.000 | 9.500  | 20.8749    | 9.8867  | lacD-2; tagatose 1,6-diphosphate aldolase                  |                         |    |    |   |   |   |   |
|          |                        |                      |         |         | 21.500 | 12.000 | 30.6847    | 12.0000 |                                                            |                         |    |    |   |   |   |   |
| SGO_1518 | 0.892                  | 4.926                | 0.0015  | 0.0030  | 7.000  | 4.500  | 10.4374    | 4.6832  | lacB-2; galactose-6-phosphate isomerase, LacB subunit      |                         |    |    |   |   |   |   |
|          |                        |                      |         |         | 6.500  | 6.000  | 9.2768     | 6.0000  |                                                            |                         |    |    |   |   |   |   |

- Show detected proteins only
- Show all proteins

Proteins found: 1179

Filter by category:

ABC Transporter

Test

Cutoff

q-Value

.005

p-Value

|             | Signif | Direction | Applies To   |
|-------------|--------|-----------|--------------|
| Red         | yes    | +         | ratios, bars |
| Yellow      | no     | n/a       | bars         |
| Green       | yes    | -         | ratios, bars |
| Pink        | yes    | +         | p-, q-Values |
| Light Green | yes    | -         | p-, q-Values |

Dot Plots Dot Plots

Summary Table

SgFn vs Sg

SgPg vs Sg

SgPgFn vs Sg

SgPg vs SgFn

SgPgFn vs SgFn

SgPgFn vs SgPg

Coverage

SgPg vs Sg

Raw

Normalized

Log<sub>2</sub> Ratios

| Protein  | SgPg vs Sg             |                      |         |         | Raw    |        |         |         | Normalized |    |      |    | Description | Log <sub>2</sub> Ratios |    |    |   |   |   |   |
|----------|------------------------|----------------------|---------|---------|--------|--------|---------|---------|------------|----|------|----|-------------|-------------------------|----|----|---|---|---|---|
|          | Log <sub>2</sub> Ratio | Log <sub>2</sub> Sum | q-Value | p-Value | SgPg   | Sg     | SgPg    | Sg      | SgPg       | Sg | SgPg | Sg |             | -6                      | -4 | -2 | 0 | 2 | 4 | 6 |
| SGO_1520 |                        | 3.058                |         |         |        | 8.000  |         | 8.3257  |            |    |      |    |             |                         |    |    |   |   |   |   |
|          |                        |                      |         |         |        |        |         |         |            |    |      |    |             |                         |    |    |   |   |   |   |
| SGO_1521 |                        | 2.170                |         |         |        |        |         |         |            |    |      |    |             |                         |    |    |   |   |   |   |
|          |                        |                      |         |         |        | 4.500  |         | 4.5000  |            |    |      |    |             |                         |    |    |   |   |   |   |
| SGO_1523 |                        |                      |         |         |        |        |         |         |            |    |      |    |             |                         |    |    |   |   |   |   |
|          |                        |                      |         |         |        |        |         |         |            |    |      |    |             |                         |    |    |   |   |   |   |
| SGO_1527 |                        | 1.865                |         |         |        |        |         |         |            |    |      |    |             |                         |    |    |   |   |   |   |
|          |                        |                      |         |         |        | 3.500  |         | 3.6425  |            |    |      |    |             |                         |    |    |   |   |   |   |
| SGO_1529 | -1.199                 | 6.053                | 0.0017  | 0.0037  | 8.500  | 21.000 | 12.6740 | 21.8549 |            |    |      |    |             |                         |    |    |   |   |   |   |
|          |                        |                      |         |         | 5.500  | 24.000 | 7.8496  | 24.0000 |            |    |      |    |             |                         |    |    |   |   |   |   |
| SGO_1530 | 0.080                  | 8.516                | 0.1062  | 0.5268  | 66.000 | 95.500 | 98.4102 | 99.3878 |            |    |      |    |             |                         |    |    |   |   |   |   |
|          |                        |                      |         |         | 62.500 | 79.000 | 89.1996 | 79.0000 |            |    |      |    |             |                         |    |    |   |   |   |   |
| SGO_1531 | 0.988                  | 6.363                | 0.0013  | 0.0023  | 20.000 | 13.000 | 29.8213 | 13.5292 |            |    |      |    |             |                         |    |    |   |   |   |   |
|          |                        |                      |         |         | 17.500 | 14.000 | 24.9759 | 14.0000 |            |    |      |    |             |                         |    |    |   |   |   |   |
| SGO_1534 | 1.089                  | 5.713                | 0.0490  | 0.2161  | 15.500 | 3.500  | 23.1115 | 3.6425  |            |    |      |    |             |                         |    |    |   |   |   |   |
|          |                        |                      |         |         | 7.500  | 15.000 | 10.7040 | 15.0000 |            |    |      |    |             |                         |    |    |   |   |   |   |
| SGO_1536 | -0.019                 | 6.475                | 0.1779  | 0.9526  | 19.000 | 18.000 | 28.3302 | 18.7328 |            |    |      |    |             |                         |    |    |   |   |   |   |
|          |                        |                      |         |         | 11.500 | 25.500 | 16.4127 | 25.5000 |            |    |      |    |             |                         |    |    |   |   |   |   |
| SGO_1538 |                        | 3.266                |         |         |        | 3.000  |         | 3.1221  |            |    |      |    |             |                         |    |    |   |   |   |   |
|          |                        |                      |         |         |        | 6.500  |         | 6.5000  |            |    |      |    |             |                         |    |    |   |   |   |   |
| SGO_1539 | 0.530                  | 6.365                | 0.0031  | 0.0075  | 15.000 | 16.000 | 22.3660 | 16.6514 |            |    |      |    |             |                         |    |    |   |   |   |   |
|          |                        |                      |         |         | 18.500 | 17.000 | 26.4031 | 17.0000 |            |    |      |    |             |                         |    |    |   |   |   |   |
| SGO_1540 | -2.147                 | 5.138                | 0.0124  | 0.0428  |        | 16.000 |         | 16.6514 |            |    |      |    |             |                         |    |    |   |   |   |   |
|          |                        |                      |         |         | 2.500  | 15.000 | 3.5680  | 15.0000 |            |    |      |    |             |                         |    |    |   |   |   |   |

- Show detected proteins only  
 Show all proteins

Proteins found:  
1179

Filter by category:

ABC Transporter

Test

Cutoff

q-Value

.005

p-Value

|             | Signif | Direction | Applies To   |
|-------------|--------|-----------|--------------|
| Red         | yes    | +         | ratios, bars |
| Yellow      | no     | n/a       | bars         |
| Green       | yes    | -         | ratios, bars |
| Pink        | yes    | +         | p-, q-Values |
| Light Green | yes    | -         | p-, q-Values |

Dot Plots Dot Plots

Summary Table

SgFn vs Sg

SgPg vs Sg

SgPgFn vs Sg

SgPg vs SgFn

SgPgFn vs SgFn

SgPgFn vs SgPg

Coverage

| Protein  | SgPg vs Sg             |                      |         |         | Raw     |         | Normalized |          | Description                                                 | Log <sub>2</sub> Ratios |    |    |   |   |
|----------|------------------------|----------------------|---------|---------|---------|---------|------------|----------|-------------------------------------------------------------|-------------------------|----|----|---|---|
|          | Log <sub>2</sub> Ratio | Log <sub>2</sub> Sum | q-Value | p-Value | SgPg    | Sg      | SgPg       | Sg       |                                                             | -6                      | -4 | -2 | 0 | 2 |
| SGO_1541 | -1.636                 | 7.569                | 0.0014  | 0.0025  | 15.500  | 60.500  | 23.1115    | 62.9629  | atpC; ATP synthase F1, epsilon subunit                      |                         |    |    |   |   |
|          |                        |                      |         |         | 16.000  | 81.000  | 22.8351    | 81.0000  |                                                             |                         |    |    |   |   |
| SGO_1542 | -1.008                 | 10.281               | 0.0002  | 0.0001  | 134.000 | 410.500 | 199.8025   | 427.2113 | atpD; ATP synthase F1, beta subunit                         |                         |    |    |   |   |
|          |                        |                      |         |         | 149.500 | 403.500 | 213.3654   | 403.5000 |                                                             |                         |    |    |   |   |
| SGO_1543 | -1.291                 | 7.418                | 0.0002  | 0.0001  | 17.000  | 60.500  | 25.3481    | 62.9629  | atpG; ATP synthase F1, gamma subunit                        |                         |    |    |   |   |
|          |                        |                      |         |         | 17.000  | 58.500  | 24.2623    | 58.5000  |                                                             |                         |    |    |   |   |
| SGO_1544 | -0.726                 | 10.124               | 0.0001  | 0.0001  | 137.500 | 330.000 | 205.0213   | 343.4342 | atpA; ATP synthase F1, alpha subunit                        |                         |    |    |   |   |
|          |                        |                      |         |         | 151.000 | 352.000 | 215.5062   | 352.0000 |                                                             |                         |    |    |   |   |
| SGO_1545 | -1.669                 | 7.677                | 0.0004  | 0.0004  | 16.500  | 80.000  | 24.6026    | 83.2568  | atpH; ATP synthase F1, delta subunit                        |                         |    |    |   |   |
|          |                        |                      |         |         | 17.000  | 72.500  | 24.2623    | 72.5000  |                                                             |                         |    |    |   |   |
| SGO_1546 | -1.026                 | 8.163                | 0.0016  | 0.0031  | 37.000  | 86.500  | 55.1694    | 90.0214  | atpF; ATP synthase F0, B subunit                            |                         |    |    |   |   |
|          |                        |                      |         |         | 28.000  | 101.500 | 39.9614    | 101.5000 |                                                             |                         |    |    |   |   |
| SGO_1550 | 0.394                  | 7.975                | 0.0120  | 0.0408  | 49.500  | 45.000  | 73.8077    | 46.8319  | glgP-1; glycogen phosphorylase                              |                         |    |    |   |   |
|          |                        |                      |         |         | 48.000  | 62.500  | 68.5053    | 62.5000  |                                                             |                         |    |    |   |   |
| SGO_1551 | 0.606                  | 5.888                | 0.1122  | 0.5606  | 14.000  | 5.000   | 20.8749    | 5.2035   | glgA; Glycogen synthase                                     |                         |    |    |   |   |
|          |                        |                      |         |         | 8.500   | 21.000  | 12.1311    | 21.0000  |                                                             |                         |    |    |   |   |
| SGO_1552 | 0.946                  | 7.357                | 0.0188  | 0.0722  | 47.000  | 32.500  | 70.0800    | 33.8231  | glgD; glucose-1-phosphate adenylyltransferase, GlgD subunit |                         |    |    |   |   |
|          |                        |                      |         |         | 27.000  | 21.500  | 38.5342    | 21.5000  |                                                             |                         |    |    |   |   |
| SGO_1553 | 1.515                  | 7.492                | 0.0004  | 0.0005  | 45.000  | 18.500  | 67.0979    | 19.2531  | glgC; glucose-1-phosphate adenylyltransferase               |                         |    |    |   |   |
|          |                        |                      |         |         | 46.000  | 28.000  | 65.6509    | 28.0000  |                                                             |                         |    |    |   |   |
| SGO_1554 | 1.332                  | 7.526                | 0.0014  | 0.0027  | 44.500  | 19.000  | 66.3523    | 19.7735  | glgB; 1,4-alpha-glucan branching enzyme                     |                         |    |    |   |   |
|          |                        |                      |         |         | 45.000  | 34.000  | 64.2237    | 34.0000  |                                                             |                         |    |    |   |   |
| SGO_1555 | 0.101                  | 11.189               | 0.0357  | 0.1513  | 410.000 | 575.500 | 611.3362   | 598.9284 | ptsI; phosphoenolpyruvate-protein phosphotransferase        |                         |    |    |   |   |
|          |                        |                      |         |         | 417.500 | 528.500 | 595.8533   | 528.5000 |                                                             |                         |    |    |   |   |

- Show detected proteins only
- Show all proteins

Proteins found: 1179

Filter by category:

ABC Transporter

Test

Cutoff

q-Value

p-Value

.005

|             | Signif | Direction | Applies To   |
|-------------|--------|-----------|--------------|
| Red         | yes    | +         | ratios, bars |
| Yellow      | no     | n/a       | bars         |
| Green       | yes    | -         | ratios, bars |
| Pink        | yes    | +         | p-, q-Values |
| Light Green | yes    | -         | p-, q-Values |

Dot Plots Dot Plots

Summary Table

SgFn vs Sg

SgPg vs Sg

SgPgFn vs Sg

SgPg vs SgFn

SgPgFn vs SgFn

SgPgFn vs SgPg

Coverage

| Protein  | SgPg vs Sg             |                      |         |         | Raw     |         | Normalized |          | Description                                            | Log <sub>2</sub> Ratios |    |    |   |   |   |   |
|----------|------------------------|----------------------|---------|---------|---------|---------|------------|----------|--------------------------------------------------------|-------------------------|----|----|---|---|---|---|
|          | Log <sub>2</sub> Ratio | Log <sub>2</sub> Sum | q-Value | p-Value | SgPg    | Sg      | SgPg       | Sg       |                                                        | -6                      | -4 | -2 | 0 | 2 | 4 | 6 |
| SGO_1556 | 0.249                  | 11.490               | 0.0302  | 0.1244  | 455.500 | 646.000 | 679.1796   | 672.2984 | phosphocarrier protein HPr                             |                         |    |    |   |   |   |   |
|          |                        |                      |         |         | 622.500 | 635.500 | 888.4279   | 635.5000 |                                                        |                         |    |    |   |   |   |   |
| SGO_1557 |                        | 4.029                |         |         |         | 8.000   |            | 8.3257   | NrdH-redoxin                                           |                         |    |    |   |   |   |   |
|          |                        |                      |         |         |         | 8.000   |            | 8.0000   |                                                        |                         |    |    |   |   |   |   |
| SGO_1558 | 0.059                  | 8.566                | 0.0833  | 0.4048  | 64.500  | 83.000  | 96.1736    | 86.3789  | nrdE; ribonucleoside-diphosphate reductase large chain |                         |    |    |   |   |   |   |
|          |                        |                      |         |         | 68.000  | 99.500  | 97.0492    | 99.5000  |                                                        |                         |    |    |   |   |   |   |
| SGO_1559 | 0.935                  | 8.231                | 0.0007  | 0.0009  | 69.000  | 45.500  | 102.8834   | 47.3523  | ribonucleoside-diphosphate reductase, beta subunit     |                         |    |    |   |   |   |   |
|          |                        |                      |         |         | 66.000  | 56.000  | 94.1948    | 56.0000  |                                                        |                         |    |    |   |   |   |   |
| SGO_1561 |                        | 3.674                |         |         |         | 6.500   |            | 6.7646   | putative zinc metallopeptidase                         |                         |    |    |   |   |   |   |
|          |                        |                      |         |         |         | 6.000   |            | 6.0000   |                                                        |                         |    |    |   |   |   |   |
| SGO_1562 |                        | 4.516                |         |         |         | 9.500   |            | 9.8867   | hypothetical protein SGO_1562                          |                         |    |    |   |   |   |   |
|          |                        |                      |         |         |         | 13.000  |            | 13.0000  |                                                        |                         |    |    |   |   |   |   |
| SGO_1564 | -0.168                 | 7.022                | 0.0959  | 0.4718  | 20.000  | 46.000  | 29.8213    | 47.8726  | transcription regulator, probable -related protein     |                         |    |    |   |   |   |   |
|          |                        |                      |         |         | 20.500  | 23.000  | 29.2575    | 23.0000  |                                                        |                         |    |    |   |   |   |   |
| SGO_1570 | 0.166                  | 9.513                | 0.0562  | 0.2548  | 139.500 | 146.500 | 208.0034   | 152.4640 | alaS; alanyl-tRNA synthetase                           |                         |    |    |   |   |   |   |
|          |                        |                      |         |         | 124.500 | 192.500 | 177.6856   | 192.5000 |                                                        |                         |    |    |   |   |   |   |
| SGO_1571 |                        | 4.888                |         |         |         | 15.000  |            | 15.6106  | Protein of unknown function (DUF567) superfamily       |                         |    |    |   |   |   |   |
|          |                        |                      |         |         |         | 14.000  |            | 14.0000  |                                                        |                         |    |    |   |   |   |   |
| SGO_1572 |                        | 9.632                |         |         |         | 377.500 |            | 392.8679 | proteinase maturation protein, putative                |                         |    |    |   |   |   |   |
|          |                        |                      |         |         |         | 400.500 |            | 400.5000 |                                                        |                         |    |    |   |   |   |   |
| SGO_1573 | 0.121                  | 3.873                | 0.1440  | 0.7432  | 2.500   |         | 3.7277     |          | O-methyltransferase family protein                     |                         |    |    |   |   |   |   |
|          |                        |                      |         |         | 4.500   | 4.500   | 6.4224     | 4.5000   |                                                        |                         |    |    |   |   |   |   |
| SGO_1574 | 1.082                  | 9.069                | 0.0001  | 0.0000  | 123.500 | 81.000  | 184.1464   | 84.2975  | pepF-1; oligoendopeptidase F                           |                         |    |    |   |   |   |   |
|          |                        |                      |         |         | 126.500 | 88.000  | 180.5400   | 88.0000  |                                                        |                         |    |    |   |   |   |   |

- Show detected proteins only
- Show all proteins

Proteins found: 1179

Filter by category:  
ABC Transporter

**Test** **Cutoff**

q-Value

p-Value

**Cutoff**

| Signif | Direction | Applies To   |
|--------|-----------|--------------|
| yes    | +         | ratios, bars |
| no     | n/a       | bars         |
| yes    | -         | ratios, bars |
| yes    | +         | p-, q-Values |
| yes    | -         | p-, q-Values |

Dot Plots  Dot Plots



Summary Table

SgFn vs Sg

SgPg vs Sg

SgPgFn vs Sg

SgPg vs SgFn

SgPgFn vs SgFn

SgPgFn vs SgPg

Coverage

SgPg vs Sg

Raw

Normalized

Log<sub>2</sub> Ratios

| Protein  | SgPg vs Sg             |                      |         |         | Raw    |         | Normalized |          | Description                                                  | Log <sub>2</sub> Ratios |    |    |   |   |   |   |
|----------|------------------------|----------------------|---------|---------|--------|---------|------------|----------|--------------------------------------------------------------|-------------------------|----|----|---|---|---|---|
|          | Log <sub>2</sub> Ratio | Log <sub>2</sub> Sum | q-Value | p-Value | SgPg   | Sg      | SgPg       | Sg       |                                                              | -6                      | -4 | -2 | 0 | 2 | 4 | 6 |
| SGO_1576 |                        | 2.832                |         |         |        | 3.000   |            | 3.1221   | ptcC; PTS system, IIC component                              |                         |    |    |   |   |   |   |
|          |                        |                      |         |         |        | 4.000   |            | 4.0000   |                                                              |                         |    |    |   |   |   |   |
| SGO_1580 |                        | 4.634                |         |         | 9.000  |         | 13.4196    |          | PTS system, Lactose/Cellobiose specific IIB subunit          |                         |    |    |   |   |   |   |
|          |                        |                      |         |         | 8.000  |         | 11.4175    |          |                                                              |                         |    |    |   |   |   |   |
| SGO_1585 | -2.854                 | 6.245                | 0.0039  | 0.0104  | 1.500  | 38.500  | 2.2366     | 40.0673  | D-Alanyl-D-Alanine carboxypeptidase                          |                         |    |    |   |   |   |   |
|          |                        |                      |         |         | 6.000  | 25.000  | 8.5632     | 25.0000  |                                                              |                         |    |    |   |   |   |   |
| SGO_1587 | 0.437                  | 6.170                | 0.0692  | 0.3251  | 17.500 | 10.000  | 26.0936    | 10.4071  | queA; S-adenosylmethionine:tRNA ribosyltransferase-isomerase |                         |    |    |   |   |   |   |
|          |                        |                      |         |         | 10.500 | 20.500  | 14.9855    | 20.5000  |                                                              |                         |    |    |   |   |   |   |
| SGO_1588 |                        | 3.890                |         |         |        | 8.000   |            | 8.3257   | arcR; arginine repressor                                     |                         |    |    |   |   |   |   |
|          |                        |                      |         |         |        | 6.500   |            | 6.5000   |                                                              |                         |    |    |   |   |   |   |
| SGO_1589 |                        | 3.546                |         |         |        | 4.500   |            | 4.6832   | arcT; putative transaminase/peptidase                        |                         |    |    |   |   |   |   |
|          |                        |                      |         |         |        | 7.000   |            | 7.0000   |                                                              |                         |    |    |   |   |   |   |
| SGO_1590 |                        | 6.934                |         |         |        | 55.500  |            | 57.7594  | arcD; arginine-ornithine antiporter                          |                         |    |    |   |   |   |   |
|          |                        |                      |         |         |        | 64.500  |            | 64.5000  |                                                              |                         |    |    |   |   |   |   |
| SGO_1591 | -1.436                 | 6.786                | 0.0047  | 0.0131  | 12.500 | 31.500  | 18.6383    | 32.7824  | arcC; carbamate kinase                                       |                         |    |    |   |   |   |   |
|          |                        |                      |         |         | 8.000  | 47.500  | 11.4175    | 47.5000  |                                                              |                         |    |    |   |   |   |   |
| SGO_1592 | -0.713                 | 9.197                | 0.0000  | 0.0000  | 74.500 | 174.500 | 111.0843   | 181.6038 | arcB; ornithine carbamoyltransferase                         |                         |    |    |   |   |   |   |
|          |                        |                      |         |         | 78.000 | 183.000 | 111.3211   | 183.0000 |                                                              |                         |    |    |   |   |   |   |
| SGO_1593 | -0.870                 | 8.998                | 0.0009  | 0.0015  | 58.000 | 148.500 | 86.4817    | 154.5454 | arcA; arginine deiminase                                     |                         |    |    |   |   |   |   |
|          |                        |                      |         |         | 66.000 | 176.000 | 94.1948    | 176.0000 |                                                              |                         |    |    |   |   |   |   |
| SGO_1594 |                        | 3.486                |         |         |        | 5.000   |            | 5.2035   | Crp/Fnr family protein                                       |                         |    |    |   |   |   |   |
|          |                        |                      |         |         |        | 6.000   |            | 6.0000   |                                                              |                         |    |    |   |   |   |   |
| SGO_1598 |                        | 2.836                |         |         |        | 3.500   |            | 3.6425   | hypothetical protein SGO_1598                                |                         |    |    |   |   |   |   |
|          |                        |                      |         |         |        | 3.500   |            | 3.5000   |                                                              |                         |    |    |   |   |   |   |

 Show detected proteins only Show all proteinsProteins found:  
1179 Filter by category:

ABC Transporter

Test

Cutoff

q-Value

.005

p-Value

|             | Signif | Direction | Applies To   |
|-------------|--------|-----------|--------------|
| Red         | yes    | +         | ratios, bars |
| Yellow      | no     | n/a       | bars         |
| Green       | yes    | -         | ratios, bars |
| Pink        | yes    | +         | p-, q-Values |
| Light Green | yes    | -         | p-, q-Values |

Dot Plots Dot Plots

Summary Table

SgFn vs Sg

SgPg vs Sg

SgPgFn vs Sg

SgPg vs SgFn

SgPgFn vs SgFn

SgPgFn vs SgPg

Coverage

| Protein  | SgPg vs Sg             |                      |         |         | Raw     |         | Normalized |          | Description                                               | Log <sub>2</sub> Ratios |    |    |   |   |   |   |
|----------|------------------------|----------------------|---------|---------|---------|---------|------------|----------|-----------------------------------------------------------|-------------------------|----|----|---|---|---|---|
|          | Log <sub>2</sub> Ratio | Log <sub>2</sub> Sum | q-Value | p-Value | SgPg    | Sg      | SgPg       | Sg       |                                                           | -6                      | -4 | -2 | 0 | 2 | 4 | 6 |
| SGO_1599 | 0.417                  | 9.437                | 0.0020  | 0.0044  | 127.500 | 135.500 | 190.1106   | 141.0162 | sodA; manganese-dependent superoxide dismutase            |                         |    |    |   |   |   |   |
|          |                        |                      |         |         | 144.500 | 156.000 | 206.2294   | 156.0000 |                                                           |                         |    |    |   |   |   |   |
| SGO_1600 |                        | 3.975                |         |         |         | 5.500   |            | 5.7239   | DNA polymerase III, delta chain                           |                         |    |    |   |   |   |   |
|          |                        |                      |         |         |         | 10.000  |            | 10.0000  |                                                           |                         |    |    |   |   |   |   |
| SGO_1601 |                        | 2.604                |         |         |         | 2.000   |            | 2.0814   | celB; DNA internalization-related competence protein celB |                         |    |    |   |   |   |   |
|          |                        |                      |         |         |         | 4.000   |            | 4.0000   |                                                           |                         |    |    |   |   |   |   |
| SGO_1604 | -2.382                 | 6.699                | 0.0006  | 0.0007  | 6.500   | 38.000  | 9.6919     | 39.5470  | acyltransferase family protein                            |                         |    |    |   |   |   |   |
|          |                        |                      |         |         | 5.000   | 47.500  | 7.1360     | 47.5000  |                                                           |                         |    |    |   |   |   |   |
| SGO_1605 | -1.656                 | 6.552                | 0.0008  | 0.0012  | 7.000   | 31.000  | 10.4374    | 32.2620  | P-type ATPase, metal cation transport                     |                         |    |    |   |   |   |   |
|          |                        |                      |         |         | 8.500   | 39.000  | 12.1311    | 39.0000  |                                                           |                         |    |    |   |   |   |   |
| SGO_1606 | -0.708                 | 4.993                | 0.0157  | 0.0575  | 5.500   | 9.000   | 8.2009     | 9.3664   | DNA methyltransferase signature protein                   |                         |    |    |   |   |   |   |
|          |                        |                      |         |         | 3.000   | 10.000  | 4.2816     | 10.0000  |                                                           |                         |    |    |   |   |   |   |
| SGO_1609 | -0.739                 | 8.236                | 0.0002  | 0.0001  | 37.000  | 88.500  | 55.1694    | 92.1028  | ATP-dependent RNA helicase, DEAD/DEAH box family          |                         |    |    |   |   |   |   |
|          |                        |                      |         |         | 40.500  | 96.500  | 57.8013    | 96.5000  |                                                           |                         |    |    |   |   |   |   |
| SGO_1614 |                        | 4.239                |         |         |         | 9.500   |            | 9.8867   | magnesium and cobalt transporter CorA family              |                         |    |    |   |   |   |   |
|          |                        |                      |         |         |         | 9.000   |            | 9.0000   |                                                           |                         |    |    |   |   |   |   |
| SGO_1617 | 0.372                  | 6.364                | 0.0788  | 0.3791  | 11.000  | 12.000  | 16.4017    | 12.4885  | prfC; peptide chain release factor 3                      |                         |    |    |   |   |   |   |
|          |                        |                      |         |         | 21.000  | 23.500  | 29.9711    | 23.5000  |                                                           |                         |    |    |   |   |   |   |
| SGO_1619 | -1.786                 | 9.723                | 0.0017  | 0.0033  | 73.000  | 357.500 | 108.8477   | 372.0537 | cation-transporting ATPase, E1-E2 family                  |                         |    |    |   |   |   |   |
|          |                        |                      |         |         | 57.000  | 283.000 | 81.3500    | 283.0000 |                                                           |                         |    |    |   |   |   |   |
| SGO_1621 | -0.354                 | 5.860                | 0.0078  | 0.0242  | 8.000   | 14.500  | 11.9285    | 15.0903  | HD domain protein                                         |                         |    |    |   |   |   |   |
|          |                        |                      |         |         | 9.500   | 17.500  | 13.5583    | 17.5000  |                                                           |                         |    |    |   |   |   |   |
| SGO_1622 | -0.155                 | 5.499                | 0.0807  | 0.3914  | 7.000   | 14.000  | 10.4374    | 14.5699  | Cof family protein                                        |                         |    |    |   |   |   |   |
|          |                        |                      |         |         | 7.500   | 9.500   | 10.7040    | 9.5000   |                                                           |                         |    |    |   |   |   |   |

- Show detected proteins only
- Show all proteins

Proteins found: 1179

Filter by category:

ABC Transporter

Test

Cutoff

q-Value

.005

p-Value

|             | Signif | Direction | Applies To   |
|-------------|--------|-----------|--------------|
| Red         | yes    | +         | ratios, bars |
| Yellow      | no     | n/a       | bars         |
| Green       | yes    | -         | ratios, bars |
| Pink        | yes    | +         | p-, q-Values |
| Light Green | yes    | -         | p-, q-Values |

Dot Plots Dot Plots

Summary Table

SgFn vs Sg

SgPg vs Sg

SgPgFn vs Sg

SgPg vs SgFn

SgPgFn vs SgFn

SgPgFn vs SgPg

Coverage

SgPg vs Sg

Raw

Normalized

Log<sub>2</sub> Ratios

| Protein  | SgPg vs Sg             |                      |         |         | Raw     |         |          |          | Normalized                                                               |    |      |    | Description | Log <sub>2</sub> Ratios |    |    |   |   |   |   |
|----------|------------------------|----------------------|---------|---------|---------|---------|----------|----------|--------------------------------------------------------------------------|----|------|----|-------------|-------------------------|----|----|---|---|---|---|
|          | Log <sub>2</sub> Ratio | Log <sub>2</sub> Sum | q-Value | p-Value | SgPg    | Sg      | SgPg     | Sg       | SgPg                                                                     | Sg | SgPg | Sg |             | -6                      | -4 | -2 | 0 | 2 | 4 | 6 |
| SGO_1623 | -0.997                 | 6.773                | 0.0003  | 0.0003  | 12.500  | 33.500  | 18.6383  | 34.8638  | murM; MurM                                                               |    |      |    |             |                         |    |    |   |   |   |   |
|          |                        |                      |         |         | 12.500  | 38.000  | 17.8399  | 38.0000  |                                                                          |    |      |    |             |                         |    |    |   |   |   |   |
| SGO_1624 | -0.926                 | 5.632                | 0.0115  | 0.0389  | 6.000   | 19.500  | 8.9464   | 20.2938  | murN; MurN protein                                                       |    |      |    |             |                         |    |    |   |   |   |   |
|          |                        |                      |         |         | 5.500   | 12.500  | 7.8496   | 12.5000  |                                                                          |    |      |    |             |                         |    |    |   |   |   |   |
| SGO_1625 | -1.236                 | 8.124                | 0.0001  | 0.0000  | 29.000  | 95.000  | 43.2408  | 98.8674  | acetoin utilization putative/CBS domain protein                          |    |      |    |             |                         |    |    |   |   |   |   |
|          |                        |                      |         |         | 28.000  | 97.000  | 39.9614  | 97.0000  |                                                                          |    |      |    |             |                         |    |    |   |   |   |   |
| SGO_1626 | -0.735                 | 7.128                | 0.0047  | 0.0132  | 16.000  | 37.000  | 23.8570  | 38.5063  | branched-chain amino acid ABC transporter, ATP-binding protein           |    |      |    |             |                         |    |    |   |   |   |   |
|          |                        |                      |         |         | 20.000  | 49.000  | 28.5439  | 49.0000  |                                                                          |    |      |    |             |                         |    |    |   |   |   |   |
| SGO_1627 | -1.163                 | 7.382                | 0.0038  | 0.0099  | 18.500  | 64.500  | 27.5847  | 67.1258  | branched-chain amino acid ABC transporter, ATP-binding protein           |    |      |    |             |                         |    |    |   |   |   |   |
|          |                        |                      |         |         | 16.500  | 48.500  | 23.5487  | 48.5000  |                                                                          |    |      |    |             |                         |    |    |   |   |   |   |
| SGO_1630 | -1.166                 | 10.605               | 0.0001  | 0.0000  | 162.000 | 509.000 | 241.5523 | 529.7212 | branched-chain amino acid ABC transporter, amino acid-binding protein    |    |      |    |             |                         |    |    |   |   |   |   |
|          |                        |                      |         |         | 167.000 | 547.500 | 238.3413 | 547.5000 |                                                                          |    |      |    |             |                         |    |    |   |   |   |   |
| SGO_1631 |                        | 3.428                |         |         |         | 6.500   |          | 6.7646   | hypothetical protein SGO_1631                                            |    |      |    |             |                         |    |    |   |   |   |   |
|          |                        |                      |         |         |         | 4.000   |          | 4.0000   |                                                                          |    |      |    |             |                         |    |    |   |   |   |   |
| SGO_1632 | -0.250                 | 7.229                | 0.0036  | 0.0092  | 22.500  | 37.500  | 33.5489  | 39.0266  | clpP; ATP-dependent Clp protease, proteolytic subunit ClpP               |    |      |    |             |                         |    |    |   |   |   |   |
|          |                        |                      |         |         | 24.500  | 42.500  | 34.9662  | 42.5000  |                                                                          |    |      |    |             |                         |    |    |   |   |   |   |
| SGO_1633 | 0.909                  | 8.114                | 0.0001  | 0.0000  | 60.000  | 45.000  | 89.4638  | 46.8319  | upp; uracil phosphoribosyltransferase                                    |    |      |    |             |                         |    |    |   |   |   |   |
|          |                        |                      |         |         | 64.000  | 49.500  | 91.3404  | 49.5000  |                                                                          |    |      |    |             |                         |    |    |   |   |   |   |
| SGO_1634 | -5.111                 | 9.102                | 0.0000  | 0.0000  | 7.000   | 256.500 | 10.4374  | 266.9420 | magnesium-translocating P-type ATPase                                    |    |      |    |             |                         |    |    |   |   |   |   |
|          |                        |                      |         |         | 4.000   | 266.500 | 5.7088   | 266.5000 |                                                                          |    |      |    |             |                         |    |    |   |   |   |   |
| SGO_1638 | 1.421                  | 5.055                | 0.0014  | 0.0027  | 7.500   | 5.500   | 11.1830  | 5.7239   | murE; UDP-N-acetylmuramoylalanyl-D-glutamate--2,6-diaminopimelate ligase |    |      |    |             |                         |    |    |   |   |   |   |
|          |                        |                      |         |         | 9.000   | 3.500   | 12.8447  | 3.5000   |                                                                          |    |      |    |             |                         |    |    |   |   |   |   |
| SGO_1648 | 1.546                  | 9.176                | 0.0020  | 0.0044  | 124.500 | 61.500  | 185.6374 | 64.0036  | ppx1; inorganic pyrophosphatase, manganese-dependent                     |    |      |    |             |                         |    |    |   |   |   |   |
|          |                        |                      |         |         | 172.000 | 83.500  | 245.4773 | 83.5000  |                                                                          |    |      |    |             |                         |    |    |   |   |   |   |

- Show detected proteins only  
 Show all proteins

Proteins found:  
1179

Filter by category:

ABC Transporter

Test

Cutoff

q-Value

.005

p-Value

|             | Signif | Direction | Applies To   |
|-------------|--------|-----------|--------------|
| Red         | yes    | +         | ratios, bars |
| Yellow      | no     | n/a       | bars         |
| Green       | yes    | -         | ratios, bars |
| Pink        | yes    | +         | p-, q-Values |
| Light Green | yes    | -         | p-, q-Values |

Dot Plots Dot Plots

Summary Table

SgFn vs Sg

SgPg vs Sg

SgPgFn vs Sg

SgPg vs SgFn

SgPgFn vs SgFn

SgPgFn vs SgPg

Coverage

SgPg vs Sg

Raw

Normalized

Log<sub>2</sub> Ratios

| Protein  | SgPg vs Sg             |                      |         |         | Raw    |         | Normalized |          | Description                                                  | Log <sub>2</sub> Ratios |    |    |   |   |
|----------|------------------------|----------------------|---------|---------|--------|---------|------------|----------|--------------------------------------------------------------|-------------------------|----|----|---|---|
|          | Log <sub>2</sub> Ratio | Log <sub>2</sub> Sum | q-Value | p-Value | SgPg   | Sg      | SgPg       | Sg       |                                                              | -6                      | -4 | -2 | 0 | 2 |
| SGO_1649 | -2.242                 | 5.905                | 0.0010  | 0.0017  | 2.500  | 26.000  | 3.7277     | 27.0585  | act; pyruvate formate-lyase-activating enzyme                |                         |    |    |   |   |
|          |                        |                      |         |         | 5.000  | 22.000  | 7.1360     | 22.0000  |                                                              |                         |    |    |   |   |
| SGO_1650 |                        | 7.977                |         |         |        | 109.000 |            | 113.4373 | LPXTG cell wall surface protein, collagen binding domain     |                         |    |    |   |   |
|          |                        |                      |         |         |        | 138.500 |            | 138.5000 |                                                              |                         |    |    |   |   |
| SGO_1651 |                        | 9.536                |         |         |        | 357.000 |            | 371.5333 | LPXTG cell wall surface protein, nuclease/phosphatase domain |                         |    |    |   |   |
|          |                        |                      |         |         |        | 371.000 |            | 371.0000 |                                                              |                         |    |    |   |   |
| SGO_1652 | 0.184                  | 7.218                | 0.0578  | 0.2631  | 26.500 | 28.500  | 39.5132    | 29.6602  | intracellular glycosyl hydrolase                             |                         |    |    |   |   |
|          |                        |                      |         |         | 27.500 | 40.500  | 39.2478    | 40.5000  |                                                              |                         |    |    |   |   |
| SGO_1653 | -2.054                 | 8.998                | 0.0002  | 0.0001  | 32.500 | 187.500 | 48.4596    | 195.1331 | trehalose PTS enzyme II                                      |                         |    |    |   |   |
|          |                        |                      |         |         | 35.500 | 217.000 | 50.6654    | 217.0000 |                                                              |                         |    |    |   |   |
| SGO_1655 | -2.739                 | 6.857                | 0.0016  | 0.0030  | 4.000  | 40.500  | 5.9643     | 42.1487  | CBS domain protein/possible hemolysin                        |                         |    |    |   |   |
|          |                        |                      |         |         | 6.500  | 58.500  | 9.2768     | 58.5000  |                                                              |                         |    |    |   |   |
| SGO_1657 |                        | 4.486                |         |         |        | 10.000  |            | 10.4071  | membrane protein                                             |                         |    |    |   |   |
|          |                        |                      |         |         |        | 12.000  |            | 12.0000  |                                                              |                         |    |    |   |   |
| SGO_1661 |                        | 3.822                |         |         |        | 3.500   |            | 3.6425   | radical SAM protein, TIGR01212 family                        |                         |    |    |   |   |
|          |                        |                      |         |         |        | 10.500  |            | 10.5000  |                                                              |                         |    |    |   |   |
| SGO_1665 |                        | 2.585                |         |         |        |         |            |          | rRNA methylase                                               |                         |    |    |   |   |
|          |                        |                      |         |         |        | 6.000   |            | 6.0000   |                                                              |                         |    |    |   |   |
| SGO_1666 | -0.970                 | 6.980                | 0.0056  | 0.0162  | 15.500 | 33.500  | 23.1115    | 34.8638  | trkA; potassium uptake protein, Trk family                   |                         |    |    |   |   |
|          |                        |                      |         |         | 13.500 | 49.000  | 19.2671    | 49.0000  |                                                              |                         |    |    |   |   |
| SGO_1669 | -0.728                 | 7.307                | 0.0126  | 0.0436  | 22.500 | 38.500  | 33.5489    | 40.0673  | ribosomal large subunit pseudouridine synthase B             |                         |    |    |   |   |
|          |                        |                      |         |         | 18.000 | 59.000  | 25.6895    | 59.0000  |                                                              |                         |    |    |   |   |
| SGO_1670 |                        | 2.379                |         |         |        | 5.000   |            | 5.2035   | scpB; segregation and condensation protein B                 |                         |    |    |   |   |
|          |                        |                      |         |         |        |         |            |          |                                                              |                         |    |    |   |   |

- Show detected proteins only  
 Show all proteins

Proteins found:  
1179

Filter by category:

ABC Transporter

Test

Cutoff

q-Value

.005

p-Value

|             | Signif | Direction | Applies To   |
|-------------|--------|-----------|--------------|
| Red         | yes    | +         | ratios, bars |
| Yellow      | no     | n/a       | bars         |
| Green       | yes    | -         | ratios, bars |
| Pink        | yes    | +         | p-, q-Values |
| Light Green | yes    | -         | p-, q-Values |

Dot Plots Dot Plots

Summary Table

SgFn vs Sg

SgPg vs Sg

SgPgFn vs Sg

SgPg vs SgFn

SgPgFn vs SgFn

SgPgFn vs SgPg

Coverage

| Protein  | SgPg vs Sg             |                      |         |         | Raw     |         | Normalized |          | Description                                                       | Log <sub>2</sub> Ratios |    |    |   |   |
|----------|------------------------|----------------------|---------|---------|---------|---------|------------|----------|-------------------------------------------------------------------|-------------------------|----|----|---|---|
|          | Log <sub>2</sub> Ratio | Log <sub>2</sub> Sum | q-Value | p-Value | SgPg    | Sg      | SgPg       | Sg       |                                                                   | -6                      | -4 | -2 | 0 | 2 |
| SGO_1674 | -0.643                 | 5.361                | 0.0040  | 0.0107  | 6.000   | 13.000  | 8.9464     | 13.5292  | phosphodiesterase, MJ0936 family                                  |                         |    |    |   |   |
|          |                        |                      |         |         | 5.000   | 11.500  | 7.1360     | 11.5000  |                                                                   |                         |    |    |   |   |
| SGO_1675 | -0.654                 | 6.276                | 0.0214  | 0.0834  | 8.500   | 17.500  | 12.6740    | 18.2124  | HAM1 protein-like protein                                         |                         |    |    |   |   |
|          |                        |                      |         |         | 12.000  | 29.500  | 17.1263    | 29.5000  |                                                                   |                         |    |    |   |   |
| SGO_1676 | 1.692                  | 5.845                | 0.0003  | 0.0002  | 14.500  | 5.500   | 21.6204    | 5.7239   | murI; glutamate racemase                                          |                         |    |    |   |   |
|          |                        |                      |         |         | 15.500  | 8.000   | 22.1215    | 8.0000   |                                                                   |                         |    |    |   |   |
| SGO_1678 | 0.029                  | 5.328                | 0.1365  | 0.6999  | 10.500  | 7.500   | 15.6562    | 7.8053   | lysA; diaminopimelate decarboxylase                               |                         |    |    |   |   |
|          |                        |                      |         |         | 4.000   | 11.000  | 5.7088     | 11.0000  |                                                                   |                         |    |    |   |   |
| SGO_1679 | -1.278                 | 10.798               | 0.0004  | 0.0003  | 198.000 | 608.000 | 295.2306   | 632.7514 | phosphotransferase system enzyme II                               |                         |    |    |   |   |
|          |                        |                      |         |         | 159.500 | 625.000 | 227.6373   | 625.0000 |                                                                   |                         |    |    |   |   |
| SGO_1680 | -2.691                 | 8.003                | 0.0007  | 0.0010  | 11.000  | 119.000 | 16.4017    | 123.8444 | phosphotransferase system enzyme II                               |                         |    |    |   |   |
|          |                        |                      |         |         | 12.500  | 98.500  | 17.8399    | 98.5000  |                                                                   |                         |    |    |   |   |
| SGO_1681 | -1.826                 | 10.284               | 0.0000  | 0.0000  | 93.000  | 471.500 | 138.6689   | 490.6946 | PTS system, mannose/fructose/sorbose family, IID component        |                         |    |    |   |   |
|          |                        |                      |         |         | 95.000  | 481.500 | 135.5834   | 481.5000 |                                                                   |                         |    |    |   |   |
| SGO_1683 | 0.563                  | 8.319                | 0.0012  | 0.0021  | 67.000  | 59.500  | 99.9013    | 61.9222  | serS; seryl-tRNA synthetase                                       |                         |    |    |   |   |
|          |                        |                      |         |         | 63.500  | 67.000  | 90.6268    | 67.0000  |                                                                   |                         |    |    |   |   |
| SGO_1684 | 1.477                  | 6.486                | 0.0012  | 0.0020  | 24.000  | 9.500   | 35.7855    | 9.8867   | acyl-CoA dehydrogenase family                                     |                         |    |    |   |   |
|          |                        |                      |         |         | 21.000  | 14.000  | 29.9711    | 14.0000  |                                                                   |                         |    |    |   |   |
| SGO_1685 | 2.779                  | 8.132                | 0.0001  | 0.0000  | 84.000  | 14.500  | 125.2494   | 15.0903  | putative peroxidase / antioxidant                                 |                         |    |    |   |   |
|          |                        |                      |         |         | 83.500  | 21.000  | 119.1707   | 21.0000  |                                                                   |                         |    |    |   |   |
| SGO_1687 | -0.031                 | 8.036                | 0.1317  | 0.6708  | 46.500  | 62.000  | 69.3345    | 64.5240  | accA; acetyl-CoA carboxylase, carboxyl transferase, alpha subunit |                         |    |    |   |   |
|          |                        |                      |         |         | 42.500  | 68.000  | 60.6557    | 68.0000  |                                                                   |                         |    |    |   |   |
| SGO_1688 | -0.423                 | 6.692                | 0.0434  | 0.1883  | 14.500  | 20.500  | 21.6204    | 21.3345  | accD; acetyl-CoA carboxylase, carboxyl transferase, beta subunit  |                         |    |    |   |   |
|          |                        |                      |         |         | 15.000  | 39.000  | 21.4079    | 39.0000  |                                                                   |                         |    |    |   |   |

- Show detected proteins only
- Show all proteins

Proteins found: 1179

Filter by category:

ABC Transporter

Test

Cutoff

q-Value

.005

p-Value

|             | Signif | Direction | Applies To   |
|-------------|--------|-----------|--------------|
| Red         | yes    | +         | ratios, bars |
| Yellow      | no     | n/a       | bars         |
| Green       | yes    | -         | ratios, bars |
| Pink        | yes    | +         | p-, q-Values |
| Light Green | yes    | -         | p-, q-Values |

Dot Plots Dot Plots

Summary Table

SgFn vs Sg

SgPg vs Sg

SgPgFn vs Sg

SgPg vs SgFn

SgPgFn vs SgFn

SgPgFn vs SgPg

Coverage

SgPg vs Sg

Raw

Normalized

Log<sub>2</sub> Ratios

| Protein  | SgPg vs Sg             |                      |         |         | Raw     |         | Normalized |          | Description                                                    | Log <sub>2</sub> Ratios |    |    |   |   |   |   |
|----------|------------------------|----------------------|---------|---------|---------|---------|------------|----------|----------------------------------------------------------------|-------------------------|----|----|---|---|---|---|
|          | Log <sub>2</sub> Ratio | Log <sub>2</sub> Sum | q-Value | p-Value | SgPg    | Sg      | SgPg       | Sg       |                                                                | -6                      | -4 | -2 | 0 | 2 | 4 | 6 |
| SGO_1689 | 0.770                  | 7.623                | 0.0018  | 0.0039  | 40.000  | 30.500  | 59.6426    | 31.7416  | accC; acetyl-CoA carboxylase, biotin carboxylase               |                         |    |    |   |   |   |   |
|          |                        |                      |         |         | 45.000  | 41.500  | 64.2237    | 41.5000  |                                                                |                         |    |    |   |   |   |   |
| SGO_1690 |                        | 5.878                |         |         | 16.000  |         | 23.8570    |          | fabZ; beta-hydroxyacyl-(acyl-carrier-protein) dehydratase FabZ |                         |    |    |   |   |   |   |
|          |                        |                      |         |         | 24.500  |         | 34.9662    |          |                                                                |                         |    |    |   |   |   |   |
| SGO_1691 | 1.379                  | 8.276                | 0.0017  | 0.0036  | 77.500  | 55.000  | 115.5574   | 57.2390  | accB; acetyl-CoA carboxylase, biotin carboxyl carrier protein  |                         |    |    |   |   |   |   |
|          |                        |                      |         |         | 74.000  | 31.500  | 105.6123   | 31.5000  |                                                                |                         |    |    |   |   |   |   |
| SGO_1692 | 1.429                  | 9.656                | 0.0001  | 0.0000  | 196.000 | 101.000 | 292.2485   | 105.1117 | 3-oxoacyl-[acyl-carrier-protein] synthase                      |                         |    |    |   |   |   |   |
|          |                        |                      |         |         | 207.500 | 113.500 | 296.1426   | 113.5000 |                                                                |                         |    |    |   |   |   |   |
| SGO_1693 | 0.871                  | 7.143                | 0.0014  | 0.0026  | 32.500  | 26.500  | 48.4596    | 27.5788  | fabG; 3-oxoacyl-(acyl-carrier-protein) reductase               |                         |    |    |   |   |   |   |
|          |                        |                      |         |         | 30.000  | 22.500  | 42.8158    | 22.5000  |                                                                |                         |    |    |   |   |   |   |
| SGO_1694 | 1.047                  | 7.221                | 0.0027  | 0.0064  | 30.000  | 20.000  | 44.7319    | 20.8142  | fabD; malonyl CoA-acyl carrier protein transacylase            |                         |    |    |   |   |   |   |
|          |                        |                      |         |         | 39.000  | 28.000  | 55.6605    | 28.0000  |                                                                |                         |    |    |   |   |   |   |
| SGO_1695 | 0.870                  | 9.770                | 0.0028  | 0.0067  | 212.000 | 147.500 | 316.1055   | 153.5047 | enoyl-acyl carrier protein(ACP) reductase                      |                         |    |    |   |   |   |   |
|          |                        |                      |         |         | 175.000 | 154.000 | 249.7588   | 154.0000 |                                                                |                         |    |    |   |   |   |   |
| SGO_1698 | -0.756                 | 5.106                | 0.0515  | 0.2316  | 5.000   | 5.000   | 7.4553     | 5.2035   | 3-oxoacyl-[acyl-carrier-protein] synthase III                  |                         |    |    |   |   |   |   |
|          |                        |                      |         |         | 3.000   | 17.500  | 4.2816     | 17.5000  |                                                                |                         |    |    |   |   |   |   |
| SGO_1699 | 0.913                  | 5.685                | 0.0055  | 0.0160  | 13.000  | 7.500   | 19.3838    | 7.8053   | transcriptional regulator, MarR family                         |                         |    |    |   |   |   |   |
|          |                        |                      |         |         | 10.000  | 10.000  | 14.2719    | 10.0000  |                                                                |                         |    |    |   |   |   |   |
| SGO_1700 | 0.135                  | 6.207                | 0.0097  | 0.0318  | 13.500  | 17.000  | 20.1294    | 17.6921  | enoyl-CoA hydratase/isomerase family protein                   |                         |    |    |   |   |   |   |
|          |                        |                      |         |         | 13.000  | 17.500  | 18.5535    | 17.5000  |                                                                |                         |    |    |   |   |   |   |
| SGO_1701 | 0.897                  | 7.802                | 0.0001  | 0.0000  | 49.000  | 36.500  | 73.0621    | 37.9859  | aspartate kinase                                               |                         |    |    |   |   |   |   |
|          |                        |                      |         |         | 50.500  | 40.000  | 72.0733    | 40.0000  |                                                                |                         |    |    |   |   |   |   |
| SGO_1708 | -1.595                 | 9.842                | 0.0073  | 0.0220  | 70.500  | 424.000 | 105.1200   | 441.2609 | amiF; Oligopeptide transport ATP-binding protein amiF          |                         |    |    |   |   |   |   |
|          |                        |                      |         |         | 82.000  | 254.500 | 117.0299   | 254.5000 |                                                                |                         |    |    |   |   |   |   |

- Show detected proteins only  
 Show all proteins

Proteins found:  
1179

Filter by category:

ABC Transporter

Test

Cutoff

q-Value

.005

p-Value

|             | Signif | Direction | Applies To   |
|-------------|--------|-----------|--------------|
| Red         | yes    | +         | ratios, bars |
| Yellow      | no     | n/a       | bars         |
| Green       | yes    | -         | ratios, bars |
| Pink        | yes    | +         | p-, q-Values |
| Light Green | yes    | -         | p-, q-Values |

Dot Plots Dot Plots

Summary Table

SgFn vs Sg

SgPg vs Sg

SgPgFn vs Sg

SgPg vs SgFn

SgPgFn vs SgFn

SgPgFn vs SgPg

Coverage

SgPg vs Sg

Raw

Normalized

Log<sub>2</sub> Ratios

| Protein  | SgPg vs Sg             |                      |         |         | Raw     |         |          |          | Normalized                                           |    |      |    | Description | Log <sub>2</sub> Ratios |    |    |   |   |   |   |
|----------|------------------------|----------------------|---------|---------|---------|---------|----------|----------|------------------------------------------------------|----|------|----|-------------|-------------------------|----|----|---|---|---|---|
|          | Log <sub>2</sub> Ratio | Log <sub>2</sub> Sum | q-Value | p-Value | SgPg    | Sg      | SgPg     | Sg       | SgPg                                                 | Sg | SgPg | Sg |             | -6                      | -4 | -2 | 0 | 2 | 4 | 6 |
| SGO_1709 | -1.584                 | 10.055               | 0.0001  | 0.0000  | 83.500  | 381.500 | 124.5038 | 397.0307 | amiE; Oligopeptide transport ATP-binding protein     |    |      |    |             |                         |    |    |   |   |   |   |
|          |                        |                      |         |         | 99.500  | 400.000 | 142.0057 | 400.0000 |                                                      |    |      |    |             |                         |    |    |   |   |   |   |
| SGO_1710 | -2.268                 | 6.883                | 0.0003  | 0.0002  | 8.000   | 49.500  | 11.9285  | 51.5151  | amiD; Oligopeptide transport system permease protein |    |      |    |             |                         |    |    |   |   |   |   |
|          |                        |                      |         |         | 6.000   | 46.000  | 8.5632   | 46.0000  |                                                      |    |      |    |             |                         |    |    |   |   |   |   |
| SGO_1711 | -1.467                 | 8.602                | 0.0014  | 0.0026  | 33.500  | 121.000 | 49.9506  | 125.9259 | hppB; Oligopeptide transport system permease         |    |      |    |             |                         |    |    |   |   |   |   |
|          |                        |                      |         |         | 37.000  | 160.000 | 52.8062  | 160.0000 |                                                      |    |      |    |             |                         |    |    |   |   |   |   |
| SGO_1712 | -1.011                 | 11.090               | 0.0001  | 0.0000  | 243.000 | 712.500 | 362.3285 | 741.5056 | hppA; oligopeptide-binding lipoprotein               |    |      |    |             |                         |    |    |   |   |   |   |
|          |                        |                      |         |         | 252.500 | 715.500 | 360.3663 | 715.5000 |                                                      |    |      |    |             |                         |    |    |   |   |   |   |
| SGO_1713 | -1.386                 | 10.708               | 0.0004  | 0.0004  | 160.000 | 615.000 | 238.5702 | 640.0364 | hppG; oligopeptide-binding lipoprotein               |    |      |    |             |                         |    |    |   |   |   |   |
|          |                        |                      |         |         | 157.000 | 570.500 | 224.0694 | 570.5000 |                                                      |    |      |    |             |                         |    |    |   |   |   |   |
| SGO_1715 | -1.406                 | 9.535                | 0.0001  | 0.0000  | 66.000  | 263.500 | 98.4102  | 274.2270 | hppH; oligopeptide-binding lipoprotein               |    |      |    |             |                         |    |    |   |   |   |   |
|          |                        |                      |         |         | 73.500  | 264.500 | 104.8987 | 264.5000 |                                                      |    |      |    |             |                         |    |    |   |   |   |   |
| SGO_1716 | -0.939                 | 9.553                | 0.0017  | 0.0034  | 90.000  | 215.000 | 134.1957 | 223.7526 | oligopeptide binding protein                         |    |      |    |             |                         |    |    |   |   |   |   |
|          |                        |                      |         |         | 86.000  | 270.500 | 122.7386 | 270.5000 |                                                      |    |      |    |             |                         |    |    |   |   |   |   |
| SGO_1717 | -3.837                 | 6.483                | 0.0278  | 0.1132  | 2.000   | 48.500  | 2.9821   | 50.4744  | pbp3; penicillin-binding protein 3                   |    |      |    |             |                         |    |    |   |   |   |   |
|          |                        |                      |         |         |         | 36.000  |          | 36.0000  |                                                      |    |      |    |             |                         |    |    |   |   |   |   |
| SGO_1718 | 0.192                  | 7.395                | 0.0742  | 0.3537  | 31.500  | 31.000  | 46.9685  | 32.2620  | sufB-1; FeS assembly protein SufB                    |    |      |    |             |                         |    |    |   |   |   |   |
|          |                        |                      |         |         | 29.500  | 47.000  | 42.1022  | 47.0000  |                                                      |    |      |    |             |                         |    |    |   |   |   |   |
| SGO_1719 |                        | 2.946                |         |         |         | 5.000   |          | 5.2035   | SUF system FeS assembly protein, NifU family         |    |      |    |             |                         |    |    |   |   |   |   |
|          |                        |                      |         |         |         | 2.500   |          | 2.5000   |                                                      |    |      |    |             |                         |    |    |   |   |   |   |
| SGO_1720 | 1.646                  | 5.980                | 0.0008  | 0.0011  | 15.500  | 5.500   | 23.1115  | 5.7239   | aminotransferase, class-V                            |    |      |    |             |                         |    |    |   |   |   |   |
|          |                        |                      |         |         | 17.000  | 10.000  | 24.2623  | 10.0000  |                                                      |    |      |    |             |                         |    |    |   |   |   |   |
| SGO_1721 | 0.589                  | 7.430                | 0.0033  | 0.0083  | 32.500  | 36.500  | 48.4596  | 37.9859  | sufD; FeS assembly protein SufD                      |    |      |    |             |                         |    |    |   |   |   |   |
|          |                        |                      |         |         | 38.500  | 31.000  | 54.9469  | 31.0000  |                                                      |    |      |    |             |                         |    |    |   |   |   |   |

- Show detected proteins only  
 Show all proteins

Proteins found:  
1179

Filter by category:

ABC Transporter

Test

Cutoff

q-Value

.005

p-Value

|             | Signif | Direction | Applies To   |
|-------------|--------|-----------|--------------|
| Red         | yes    | +         | ratios, bars |
| Yellow      | no     | n/a       | bars         |
| Green       | yes    | -         | ratios, bars |
| Pink        | yes    | +         | p-, q-Values |
| Light Green | yes    | -         | p-, q-Values |

Dot Plots Dot Plots

Summary Table

SgFn vs Sg

SgPg vs Sg

SgPgFn vs Sg

SgPg vs SgFn

SgPgFn vs SgFn

SgPgFn vs SgPg

Coverage

| Protein  | SgPg vs Sg             |                      |         |         | Raw     |         | Normalized |          | Description                                                     | Log <sub>2</sub> Ratios |    |    |   |   |
|----------|------------------------|----------------------|---------|---------|---------|---------|------------|----------|-----------------------------------------------------------------|-------------------------|----|----|---|---|
|          | Log <sub>2</sub> Ratio | Log <sub>2</sub> Sum | q-Value | p-Value | SgPg    | Sg      | SgPg       | Sg       |                                                                 | -6                      | -4 | -2 | 0 | 2 |
| SGO_1722 | 0.437                  | 6.734                | 0.0079  | 0.0243  | 19.000  | 19.500  | 28.3302    | 20.2938  | sufC; FeS assembly ATPase SufC                                  |                         |    |    |   |   |
|          |                        |                      |         |         | 23.000  | 25.000  | 32.8254    | 25.0000  |                                                                 |                         |    |    |   |   |
| SGO_1724 | -0.127                 | 3.848                | 0.1462  | 0.7567  |         | 3.000   |            | 3.1221   | mecA; Adapter protein mec                                       |                         |    |    |   |   |
|          |                        |                      |         |         | 3.000   | 7.000   | 4.2816     | 7.0000   |                                                                 |                         |    |    |   |   |
| SGO_1725 |                        | 4.038                |         |         |         | 10.500  |            | 10.9275  | bacA; bacitracin resistance protein                             |                         |    |    |   |   |
|          |                        |                      |         |         |         | 5.500   |            | 5.5000   |                                                                 |                         |    |    |   |   |
| SGO_1726 |                        | 4.724                |         |         |         | 10.500  |            | 10.9275  | hypothetical protein SGO_1726                                   |                         |    |    |   |   |
|          |                        |                      |         |         |         | 15.500  |            | 15.5000  |                                                                 |                         |    |    |   |   |
| SGO_1727 | -0.949                 | 7.719                | 0.0005  | 0.0007  | 22.000  | 64.500  | 32.8034    | 67.1258  | amino acid ABC transporter, amino acid-binding/permease protein |                         |    |    |   |   |
|          |                        |                      |         |         | 27.500  | 71.500  | 39.2478    | 71.5000  |                                                                 |                         |    |    |   |   |
| SGO_1728 | -1.549                 | 7.411                | 0.0042  | 0.0114  | 17.000  | 73.000  | 25.3481    | 75.9718  | glnQ; glutamine ABC transporter ATP-binding protein             |                         |    |    |   |   |
|          |                        |                      |         |         | 12.500  | 51.000  | 17.8399    | 51.0000  |                                                                 |                         |    |    |   |   |
| SGO_1729 |                        | 6.111                |         |         | 20.500  |         | 30.5668    |          | hypothetical protein SGO_1729                                   |                         |    |    |   |   |
|          |                        |                      |         |         | 27.000  |         | 38.5342    |          |                                                                 |                         |    |    |   |   |
| SGO_1730 | -1.409                 | 9.596                | 0.0011  | 0.0019  | 60.500  | 292.500 | 90.2094    | 304.4076 | SPFH domain/Band 7 family                                       |                         |    |    |   |   |
|          |                        |                      |         |         | 86.000  | 256.500 | 122.7386   | 256.5000 |                                                                 |                         |    |    |   |   |
| SGO_1731 | 2.963                  | 5.857                | 0.0014  | 0.0026  | 14.500  | 2.000   | 21.6204    | 2.0814   | DNA-binding response regulator                                  |                         |    |    |   |   |
|          |                        |                      |         |         | 20.500  | 5.000   | 29.2575    | 5.0000   |                                                                 |                         |    |    |   |   |
| SGO_1732 | 0.137                  | 5.243                | 0.1748  | 0.9291  |         | 6.000   |            | 6.2443   | histidine kinase                                                |                         |    |    |   |   |
|          |                        |                      |         |         | 8.500   | 19.500  | 12.1311    | 19.5000  |                                                                 |                         |    |    |   |   |
| SGO_1735 | 0.067                  | 9.482                | 0.0791  | 0.3811  | 123.500 | 155.500 | 184.1464   | 161.8303 | hypothetical protein SGO_1735                                   |                         |    |    |   |   |
|          |                        |                      |         |         | 127.000 | 188.000 | 181.2536   | 188.0000 |                                                                 |                         |    |    |   |   |
| SGO_1736 | 0.919                  | 6.090                | 0.0042  | 0.0115  | 17.000  | 12.500  | 25.3481    | 13.0089  | alkaline shock protein                                          |                         |    |    |   |   |
|          |                        |                      |         |         | 13.500  | 10.500  | 19.2671    | 10.5000  |                                                                 |                         |    |    |   |   |

- Show detected proteins only
- Show all proteins

Proteins found: 1179

Filter by category:

ABC Transporter

Test

Cutoff

q-Value

.005

p-Value

|             | Signif | Direction | Applies To   |
|-------------|--------|-----------|--------------|
| Red         | yes    | +         | ratios, bars |
| Yellow      | no     | n/a       | bars         |
| Green       | yes    | -         | ratios, bars |
| Pink        | yes    | +         | p-, q-Values |
| Light Green | yes    | -         | p-, q-Values |

Dot Plots Dot Plots



Summary Table

SgFn vs Sg

SgPg vs Sg

SgPgFn vs Sg

SgPg vs SgFn

SgPgFn vs SgFn

SgPgFn vs SgPg

Coverage

| Protein  | SgPg vs Sg             |                      |         |         | Raw      |         | Normalized |          | Description                                                         | Log <sub>2</sub> Ratios |    |    |   |   |   |   |
|----------|------------------------|----------------------|---------|---------|----------|---------|------------|----------|---------------------------------------------------------------------|-------------------------|----|----|---|---|---|---|
|          | Log <sub>2</sub> Ratio | Log <sub>2</sub> Sum | q-Value | p-Value | SgPg     | Sg      | SgPg       | Sg       |                                                                     | -6                      | -4 | -2 | 0 | 2 | 4 | 6 |
| SGO_1737 |                        | 5.867                |         |         |          | 21.500  |            | 22.3753  | rpmB; ribosomal protein L28                                         |                         |    |    |   |   |   |   |
|          |                        |                      |         |         |          | 36.000  |            | 36.0000  |                                                                     |                         |    |    |   |   |   |   |
| SGO_1738 |                        | 4.320                |         |         |          | 11.500  |            | 11.9682  | hypothetical protein SGO_1738                                       |                         |    |    |   |   |   |   |
|          |                        |                      |         |         |          | 8.000   |            | 8.0000   |                                                                     |                         |    |    |   |   |   |   |
| SGO_1739 |                        | 4.076                |         |         |          | 9.000   |            | 9.3664   | LytTr DNA-binding domain family                                     |                         |    |    |   |   |   |   |
|          |                        |                      |         |         |          | 7.500   |            | 7.5000   |                                                                     |                         |    |    |   |   |   |   |
| SGO_1744 |                        | 4.350                |         |         |          | 9.500   |            | 9.8867   | ABC transporter, ATP-binding protein SPO636                         |                         |    |    |   |   |   |   |
|          |                        |                      |         |         |          | 10.500  |            | 10.5000  |                                                                     |                         |    |    |   |   |   |   |
| SGO_1745 | 1.138                  | 12.225               | 0.0005  | 0.0006  | 1075.000 | 810.500 | 1602.8936  | 843.4951 | fba; fructose-1,6-bisphosphate aldolase, class II                   |                         |    |    |   |   |   | ■ |
|          |                        |                      |         |         | 1177.500 | 659.500 | 1680.5202  | 659.5000 |                                                                     |                         |    |    |   |   |   |   |
| SGO_1747 |                        | 2.553                |         |         | 2.500    |         | 3.7277     |          | hypothetical protein SGO_1747                                       |                         |    |    |   |   |   |   |
|          |                        |                      |         |         | 1.500    |         | 2.1408     |          |                                                                     |                         |    |    |   |   |   |   |
| SGO_1748 | 0.671                  | 5.923                | 0.0190  | 0.0733  | 9.500    | 11.500  | 14.1651    | 11.9682  | pyrG; CTP synthase                                                  |                         |    |    |   |   |   | ■ |
|          |                        |                      |         |         | 16.500   | 11.000  | 23.5487    | 11.0000  |                                                                     |                         |    |    |   |   |   |   |
| SGO_1749 | 0.588                  | 6.953                | 0.0186  | 0.0713  | 21.000   | 19.000  | 31.3123    | 19.7735  | manA; mannose-6-phosphate isomerase, class I                        |                         |    |    |   |   |   | ■ |
|          |                        |                      |         |         | 30.000   | 30.000  | 42.8158    | 30.0000  |                                                                     |                         |    |    |   |   |   |   |
| SGO_1750 |                        | 5.518                |         |         |          | 20.000  |            | 20.8142  | ABC-type multidrug/protein/lipid transport system, ATPase component |                         |    |    |   |   |   |   |
|          |                        |                      |         |         |          | 25.000  |            | 25.0000  |                                                                     |                         |    |    |   |   |   |   |
| SGO_1751 | -2.262                 | 6.233                | 0.0014  | 0.0025  | 2.500    | 31.500  | 3.7277     | 32.7824  | ABC-type multidrug/protein/lipid transport system, ATPase component |                         |    |    |   |   |   | ■ |
|          |                        |                      |         |         | 7.500    | 28.000  | 10.7040    | 28.0000  |                                                                     |                         |    |    |   |   |   |   |
| SGO_1753 |                        | 2.643                |         |         |          | 6.000   |            | 6.2443   | hypothetical protein SGO_1753                                       |                         |    |    |   |   |   |   |
|          |                        |                      |         |         |          |         |            |          |                                                                     |                         |    |    |   |   |   |   |
| SGO_1755 | 0.917                  | 7.427                | 0.0037  | 0.0097  | 42.500   | 25.500  | 63.3702    | 26.5381  | scrK; fructokinase                                                  |                         |    |    |   |   |   | ■ |
|          |                        |                      |         |         | 34.500   | 33.000  | 49.2382    | 33.0000  |                                                                     |                         |    |    |   |   |   |   |

- Show detected proteins only
- Show all proteins

Proteins found: 1179

Filter by category:

ABC Transporter

Test

Cutoff

q-Value

.005

p-Value

|   | Signif | Direction | Applies To   |
|---|--------|-----------|--------------|
| ■ | yes    | +         | ratios, bars |
| ■ | no     | n/a       | bars         |
| ■ | yes    | -         | ratios, bars |
| ■ | yes    | +         | p-, q-Values |
| ■ | yes    | -         | p-, q-Values |

Dot Plots Dot Plots

Summary Table

SgFn vs Sg

SgPg vs Sg

SgPgFn vs Sg

SgPg vs SgFn

SgPgFn vs SgFn

SgPgFn vs SgPg

Coverage

SgPg vs Sg

Raw

Normalized

Log<sub>2</sub> Ratios

| Protein  | SgPg vs Sg             |                      |         |         | Raw    |         | Normalized |          | Description                                              | Log <sub>2</sub> Ratios |    |    |   |   |   |   |
|----------|------------------------|----------------------|---------|---------|--------|---------|------------|----------|----------------------------------------------------------|-------------------------|----|----|---|---|---|---|
|          | Log <sub>2</sub> Ratio | Log <sub>2</sub> Sum | q-Value | p-Value | SgPg   | Sg      | SgPg       | Sg       |                                                          | -6                      | -4 | -2 | 0 | 2 | 4 | 6 |
| SGO_1756 |                        | 2.170                |         |         |        |         |            |          | hypothetical protein SGO_1756                            |                         |    |    |   |   |   |   |
| SGO_1757 | 0.303                  | 8.837                | 0.0214  | 0.0836  | 82.000 | 84.500  | 122.2672   | 87.9400  | glmS; glucosamine--fructose-6-phosphate aminotransferase |                         |    |    |   |   |   |   |
|          |                        |                      |         |         | 90.500 | 118.000 | 129.1610   | 118.0000 |                                                          |                         |    |    |   |   |   |   |
| SGO_1760 |                        | 2.098                |         |         |        |         |            |          | DNA-binding response regulator                           |                         |    |    |   |   |   |   |
|          |                        |                      |         |         | 3.000  |         | 4.2816     |          |                                                          |                         |    |    |   |   |   |   |
| SGO_1761 |                        | 4.631                |         |         |        |         |            |          | histidine kinase                                         |                         |    |    |   |   |   |   |
|          |                        |                      |         |         |        | 7.000   |            | 7.2850   |                                                          |                         |    |    |   |   |   |   |
| SGO_1763 | 0.005                  | 7.920                | 0.1768  | 0.9410  | 36.000 | 53.000  | 53.6783    | 55.1576  | ABC transporter, substrate-binding protein SP0092        |                         |    |    |   |   |   |   |
|          |                        |                      |         |         | 47.500 | 65.500  | 67.7917    | 65.5000  |                                                          |                         |    |    |   |   |   |   |
| SGO_1768 | 0.808                  | 4.468                | 0.0490  | 0.2172  | 2.500  | 5.000   | 3.7277     | 5.2035   | glycosyl hydrolase, family 38                            |                         |    |    |   |   |   |   |
|          |                        |                      |         |         | 7.500  | 2.500   | 10.7040    | 2.5000   |                                                          |                         |    |    |   |   |   |   |
| SGO_1772 |                        | 3.858                |         |         |        |         |            |          | integral membrane protein                                |                         |    |    |   |   |   |   |
|          |                        |                      |         |         |        | 14.500  |            | 14.5000  |                                                          |                         |    |    |   |   |   |   |
| SGO_1774 | 0.032                  | 5.695                | 0.1520  | 0.7951  | 10.500 | 11.000  | 15.6562    | 11.4478  | alcohol dehydrogenase, zinc-containing                   |                         |    |    |   |   |   |   |
|          |                        |                      |         |         | 7.500  | 14.000  | 10.7040    | 14.0000  |                                                          |                         |    |    |   |   |   |   |
| SGO_1780 |                        | 1.322                |         |         |        |         |            |          | hypothetical protein SGO_1780                            |                         |    |    |   |   |   |   |
|          |                        |                      |         |         |        | 2.500   |            | 2.5000   |                                                          |                         |    |    |   |   |   |   |
| SGO_1784 | 0.586                  | 8.378                | 0.0027  | 0.0063  | 70.000 | 57.500  | 104.3745   | 59.8408  | leuS; leucyl-tRNA synthetase                             |                         |    |    |   |   |   |   |
|          |                        |                      |         |         | 66.500 | 73.500  | 94.9084    | 73.5000  |                                                          |                         |    |    |   |   |   |   |
| SGO_1792 |                        | 1.585                |         |         |        |         |            |          | transcription regulator                                  |                         |    |    |   |   |   |   |
|          |                        |                      |         |         |        | 3.000   |            | 3.0000   |                                                          |                         |    |    |   |   |   |   |
| SGO_1799 | 1.049                  | 8.530                | 0.0008  | 0.0012  | 80.500 | 50.500  | 120.0306   | 52.5558  | endopeptidase O                                          |                         |    |    |   |   |   |   |
|          |                        |                      |         |         | 90.000 | 68.500  | 128.4474   | 68.5000  |                                                          |                         |    |    |   |   |   |   |

- Show detected proteins only  
 Show all proteins

Proteins found:  
1179

Filter by category:

ABC Transporter

Test

Cutoff

q-Value

.005

p-Value

|             | Signif | Direction | Applies To   |
|-------------|--------|-----------|--------------|
| Red         | yes    | +         | ratios, bars |
| Yellow      | no     | n/a       | bars         |
| Green       | yes    | -         | ratios, bars |
| Pink        | yes    | +         | p-, q-Values |
| Light Green | yes    | -         | p-, q-Values |

Dot Plots Dot Plots

Summary Table

SgFn vs Sg

SgPg vs Sg

SgPgFn vs Sg

SgPg vs SgFn

SgPgFn vs SgFn

SgPgFn vs SgPg

Coverage

SgPg vs Sg

Raw

Normalized

Log<sub>2</sub> Ratios

| Protein  | SgPg vs Sg             |                      |         |         | Raw     |          |          |           | Normalized                                                    |    |      |    | Description | Log <sub>2</sub> Ratios |    |    |   |   |   |   |
|----------|------------------------|----------------------|---------|---------|---------|----------|----------|-----------|---------------------------------------------------------------|----|------|----|-------------|-------------------------|----|----|---|---|---|---|
|          | Log <sub>2</sub> Ratio | Log <sub>2</sub> Sum | q-Value | p-Value | SgPg    | Sg       | SgPg     | Sg        | SgPg                                                          | Sg | SgPg | Sg |             | -6                      | -4 | -2 | 0 | 2 | 4 | 6 |
| SGO_1800 | -2.160                 | 8.427                | 0.0005  | 0.0007  | 22.000  | 147.500  | 32.8034  | 153.5047  | troB; manganese ABC transporter, ATP-binding protein SP1648   |    |      |    |             |                         |    |    |   |   |   |   |
|          |                        |                      |         |         | 21.000  | 128.000  | 29.9711  | 128.0000  |                                                               |    |      |    |             |                         |    |    |   |   |   |   |
| SGO_1802 | -2.784                 | 11.227               | 0.0004  | 0.0004  | 119.500 | 1088.500 | 178.1821 | 1132.8124 | Metal ABC transporter substrate-binding lipoprotein precursor |    |      |    |             |                         |    |    |   |   |   |   |
|          |                        |                      |         |         | 90.000  | 958.000  | 128.4474 | 958.0000  |                                                               |    |      |    |             |                         |    |    |   |   |   |   |
| SGO_1803 | 1.645                  | 6.828                | 0.0001  | 0.0000  | 29.500  | 13.000   | 43.9864  | 13.5292   | tpx; thioredoxin peroxidase                                   |    |      |    |             |                         |    |    |   |   |   |   |
|          |                        |                      |         |         | 29.500  | 14.000   | 42.1022  | 14.0000   |                                                               |    |      |    |             |                         |    |    |   |   |   |   |
| SGO_1804 | 2.632                  | 5.330                | 0.0096  | 0.0315  | 13.000  |          | 19.3838  |           | hutI; imidazolonepropionase                                   |    |      |    |             |                         |    |    |   |   |   |   |
|          |                        |                      |         |         | 12.500  | 3.000    | 17.8399  | 3.0000    |                                                               |    |      |    |             |                         |    |    |   |   |   |   |
| SGO_1805 | 4.930                  | 6.617                | 0.0277  | 0.1125  | 38.000  | 1.500    | 56.6604  | 1.5611    | hutU; urocanate hydratase                                     |    |      |    |             |                         |    |    |   |   |   |   |
|          |                        |                      |         |         | 28.000  |          | 39.9614  |           |                                                               |    |      |    |             |                         |    |    |   |   |   |   |
| SGO_1806 |                        | 5.242                |         |         | 11.500  |          | 17.1472  |           | ftcD; glutamate formiminotransferase                          |    |      |    |             |                         |    |    |   |   |   |   |
|          |                        |                      |         |         | 14.500  |          | 20.6943  |           |                                                               |    |      |    |             |                         |    |    |   |   |   |   |
| SGO_1807 |                        | 4.350                |         |         | 6.500   |          | 9.6919   |           | serine cycle enzyme, putative                                 |    |      |    |             |                         |    |    |   |   |   |   |
|          |                        |                      |         |         | 7.500   |          | 10.7040  |           |                                                               |    |      |    |             |                         |    |    |   |   |   |   |
| SGO_1808 |                        | 3.454                |         |         | 4.000   |          | 5.9643   |           | fhs-2; formate--tetrahydrofolate ligase                       |    |      |    |             |                         |    |    |   |   |   |   |
|          |                        |                      |         |         | 3.500   |          | 4.9952   |           |                                                               |    |      |    |             |                         |    |    |   |   |   |   |
| SGO_1811 | 1.223                  | 5.013                | 0.0001  | 0.0000  | 7.500   | 4.500    | 11.1830  | 4.6832    | hutH; histidine ammonia-lyase                                 |    |      |    |             |                         |    |    |   |   |   |   |
|          |                        |                      |         |         | 8.000   | 5.000    | 11.4175  | 5.0000    |                                                               |    |      |    |             |                         |    |    |   |   |   |   |
| SGO_1813 |                        | 2.000                |         |         |         |          |          |           | hutG; formimidoylglutamase                                    |    |      |    |             |                         |    |    |   |   |   |   |
|          |                        |                      |         |         |         | 4.000    |          | 4.0000    |                                                               |    |      |    |             |                         |    |    |   |   |   |   |
| SGO_1814 |                        | 3.940                |         |         |         | 8.500    |          | 8.8460    | putative regulatory protein                                   |    |      |    |             |                         |    |    |   |   |   |   |
|          |                        |                      |         |         |         | 6.500    |          | 6.5000    |                                                               |    |      |    |             |                         |    |    |   |   |   |   |
| SGO_1816 | 0.145                  | 4.910                | 0.0440  | 0.1916  |         | 9.000    |          | 9.3664    | scaR; ScaR Manganese-dependent regulator of scaCBA            |    |      |    |             |                         |    |    |   |   |   |   |
|          |                        |                      |         |         | 7.500   | 10.000   | 10.7040  | 10.0000   |                                                               |    |      |    |             |                         |    |    |   |   |   |   |

 Show detected proteins only Show all proteinsProteins found:  
1179 Filter by category:

ABC Transporter

Test

Cutoff

q-Value

.005

p-Value

|             | Signif | Direction | Applies To   |
|-------------|--------|-----------|--------------|
| Red         | yes    | +         | ratios, bars |
| Yellow      | no     | n/a       | bars         |
| Green       | yes    | -         | ratios, bars |
| Pink        | yes    | +         | p-, q-Values |
| Light Green | yes    | -         | p-, q-Values |

Dot Plots Dot Plots

Summary Table SgFn vs Sg SgPg vs Sg SgPgFn vs Sg SgPg vs SgFn SgPgFn vs SgFn SgPgFn vs SgPg Coverage

| Protein  | SgPg vs Sg             |                      |         |         | Raw    |         | Normalized |          | Description                                                 | Log <sub>2</sub> Ratios |    |    |   |   |
|----------|------------------------|----------------------|---------|---------|--------|---------|------------|----------|-------------------------------------------------------------|-------------------------|----|----|---|---|
|          | Log <sub>2</sub> Ratio | Log <sub>2</sub> Sum | q-Value | p-Value | SgPg   | Sg      | SgPg       | Sg       |                                                             | -6                      | -4 | -2 | 0 | 2 |
| SGO_1822 | -1.768                 | 6.687                | 0.0004  | 0.0004  | 8.000  | 41.000  | 11.9285    | 42.6691  | relA; GTP diphosphokinase                                   |                         |    |    |   |   |
|          |                        |                      |         |         | 8.000  | 37.000  | 11.4175    | 37.0000  |                                                             |                         |    |    |   |   |
| SGO_1823 |                        | 3.722                |         |         | 5.500  |         | 8.2009     |          | conserved hypothetical protein TIGR00046                    |                         |    |    |   |   |
|          |                        |                      |         |         | 3.500  |         | 4.9952     |          |                                                             |                         |    |    |   |   |
| SGO_1824 | 0.820                  | 6.059                | 0.0028  | 0.0069  | 14.000 | 9.500   | 20.8749    | 9.8867   | prmA; ribosomal protein L11 methyltransferase               |                         |    |    |   |   |
|          |                        |                      |         |         | 15.000 | 14.500  | 21.4079    | 14.5000  |                                                             |                         |    |    |   |   |
| SGO_1827 | -0.256                 | 4.992                | 0.0635  | 0.2934  | 4.000  | 7.000   | 5.9643     | 7.2850   | hypothetical protein SGO_1827                               |                         |    |    |   |   |
|          |                        |                      |         |         | 6.000  | 10.000  | 8.5632     | 10.0000  |                                                             |                         |    |    |   |   |
| SGO_1828 | 0.056                  | 4.482                | 0.1520  | 0.7952  | 2.500  | 6.500   | 3.7277     | 6.7646   | ATPase, AAA family                                          |                         |    |    |   |   |
|          |                        |                      |         |         | 5.500  | 4.000   | 7.8496     | 4.0000   |                                                             |                         |    |    |   |   |
| SGO_1834 | 2.739                  | 6.583                | 0.0043  | 0.0117  | 35.500 | 7.000   | 52.9328    | 7.2850   | hypothetical protein SGO_1834                               |                         |    |    |   |   |
|          |                        |                      |         |         | 21.500 | 5.000   | 30.6847    | 5.0000   |                                                             |                         |    |    |   |   |
| SGO_1835 | 0.863                  | 3.800                | 0.0170  | 0.0631  | 3.500  |         | 5.2187     |          | hypothetical protein SGO_1835                               |                         |    |    |   |   |
|          |                        |                      |         |         | 4.000  | 3.000   | 5.7088     | 3.0000   |                                                             |                         |    |    |   |   |
| SGO_1843 | 0.981                  | 8.067                | 0.0026  | 0.0060  | 67.000 | 45.500  | 99.9013    | 47.3523  | pepS; aminopeptidase PepS                                   |                         |    |    |   |   |
|          |                        |                      |         |         | 55.000 | 42.500  | 78.4956    | 42.5000  |                                                             |                         |    |    |   |   |
| SGO_1844 | 0.775                  | 5.772                | 0.0050  | 0.0141  | 12.500 | 8.000   | 18.6383    | 8.3257   | cbxX/cfqX family protein                                    |                         |    |    |   |   |
|          |                        |                      |         |         | 11.000 | 12.000  | 15.6991    | 12.0000  |                                                             |                         |    |    |   |   |
| SGO_1847 | 0.057                  | 6.008                | 0.1039  | 0.5132  | 10.500 | 14.000  | 15.6562    | 14.5699  | polC; DNA polymerase III, alpha subunit, Gram-positive type |                         |    |    |   |   |
|          |                        |                      |         |         | 12.000 | 17.000  | 17.1263    | 17.0000  |                                                             |                         |    |    |   |   |
| SGO_1848 | -3.095                 | 7.448                | 0.0004  | 0.0005  | 6.500  | 82.000  | 9.6919     | 85.3382  | lipoprotein, putative                                       |                         |    |    |   |   |
|          |                        |                      |         |         | 6.000  | 71.000  | 8.5632     | 71.0000  |                                                             |                         |    |    |   |   |
| SGO_1849 |                        | 7.582                |         |         |        | 87.500  |            | 91.0621  | hypothetical protein SGO_1849                               |                         |    |    |   |   |
|          |                        |                      |         |         |        | 100.500 |            | 100.5000 |                                                             |                         |    |    |   |   |

Show detected proteins only  
 Show all proteins

Filter by category:

Proteins found: 1179

**Test** **Cutoff**

|  | Signif | Direction | Applies To   |
|--|--------|-----------|--------------|
|  | yes    | +         | ratios, bars |
|  | no     | n/a       | bars         |
|  | yes    | -         | ratios, bars |
|  | yes    | +         | p-, q-Values |
|  | yes    | -         | p-, q-Values |

Dot Plots  Dot Plots

Summary Table

SgFn vs Sg

SgPg vs Sg

SgPgFn vs Sg

SgPg vs SgFn

SgPgFn vs SgFn

SgPgFn vs SgPg

Coverage

SgPg vs Sg

Raw

Normalized

Log<sub>2</sub> Ratios

| Protein  | SgPg vs Sg             |                      |         |         | Raw    |         |          |          | Normalized |    |      |    | Description | Log <sub>2</sub> Ratios |    |    |   |   |   |   |
|----------|------------------------|----------------------|---------|---------|--------|---------|----------|----------|------------|----|------|----|-------------|-------------------------|----|----|---|---|---|---|
|          | Log <sub>2</sub> Ratio | Log <sub>2</sub> Sum | q-Value | p-Value | SgPg   | Sg      | SgPg     | Sg       | SgPg       | Sg | SgPg | Sg |             | -6                      | -4 | -2 | 0 | 2 | 4 | 6 |
| SGO_1851 | 0.365                  | 8.961                | 0.0066  | 0.0196  | 99.500 | 96.500  | 148.3608 | 100.4285 |            |    |      |    |             |                         |    |    |   |   |   |   |
|          |                        |                      |         |         | 92.500 | 117.500 | 132.0154 | 117.5000 |            |    |      |    |             |                         |    |    |   |   |   |   |
| SGO_1852 | -1.841                 | 6.734                | 0.0003  | 0.0003  | 9.000  | 38.000  | 13.4196  | 39.5470  |            |    |      |    |             |                         |    |    |   |   |   |   |
|          |                        |                      |         |         | 7.000  | 43.500  | 9.9904   | 43.5000  |            |    |      |    |             |                         |    |    |   |   |   |   |
| SGO_1854 | -1.307                 | 7.017                | 0.0015  | 0.0028  | 16.000 | 45.500  | 23.8570  | 47.3523  |            |    |      |    |             |                         |    |    |   |   |   |   |
|          |                        |                      |         |         | 10.000 | 44.000  | 14.2719  | 44.0000  |            |    |      |    |             |                         |    |    |   |   |   |   |
| SGO_1855 | -1.217                 | 8.163                | 0.0022  | 0.0049  | 35.000 | 86.500  | 52.1872  | 90.0214  |            |    |      |    |             |                         |    |    |   |   |   |   |
|          |                        |                      |         |         | 24.500 | 109.500 | 34.9662  | 109.5000 |            |    |      |    |             |                         |    |    |   |   |   |   |
| SGO_1856 | -0.896                 | 6.760                | 0.0005  | 0.0007  | 14.000 | 33.500  | 20.8749  | 34.8638  |            |    |      |    |             |                         |    |    |   |   |   |   |
|          |                        |                      |         |         | 12.000 | 35.500  | 17.1263  | 35.5000  |            |    |      |    |             |                         |    |    |   |   |   |   |
| SGO_1857 | -2.113                 | 4.877                | 0.0396  | 0.1700  | 2.000  | 10.000  | 2.9821   | 10.4071  |            |    |      |    |             |                         |    |    |   |   |   |   |
|          |                        |                      |         |         |        | 16.000  |          | 16.0000  |            |    |      |    |             |                         |    |    |   |   |   |   |
| SGO_1858 | 1.448                  | 3.696                | 0.0223  | 0.0881  | 4.000  |         | 5.9643   |          |            |    |      |    |             |                         |    |    |   |   |   |   |
|          |                        |                      |         |         | 3.500  | 2.000   | 4.9952   | 2.0000   |            |    |      |    |             |                         |    |    |   |   |   |   |
| SGO_1860 | -1.332                 | 9.034                | 0.0020  | 0.0044  | 53.000 | 204.500 | 79.0264  | 212.8251 |            |    |      |    |             |                         |    |    |   |   |   |   |
|          |                        |                      |         |         | 48.500 | 163.000 | 69.2189  | 163.0000 |            |    |      |    |             |                         |    |    |   |   |   |   |
| SGO_1861 | 2.171                  | 5.189                | 0.0108  | 0.0360  | 11.500 | 3.500   | 17.1472  | 3.6425   |            |    |      |    |             |                         |    |    |   |   |   |   |
|          |                        |                      |         |         | 11.000 |         | 15.6991  |          |            |    |      |    |             |                         |    |    |   |   |   |   |
| SGO_1862 | 0.941                  | 6.840                | 0.0011  | 0.0017  | 26.500 | 21.000  | 39.5132  | 21.8549  |            |    |      |    |             |                         |    |    |   |   |   |   |
|          |                        |                      |         |         | 25.000 | 17.500  | 35.6798  | 17.5000  |            |    |      |    |             |                         |    |    |   |   |   |   |
| SGO_1863 | 0.394                  | 8.526                | 0.0017  | 0.0034  | 69.000 | 72.000  | 102.8834 | 74.9311  |            |    |      |    |             |                         |    |    |   |   |   |   |
|          |                        |                      |         |         | 74.500 | 84.500  | 106.3259 | 84.5000  |            |    |      |    |             |                         |    |    |   |   |   |   |
| SGO_1864 | 0.586                  | 7.241                | 0.0040  | 0.0105  | 30.000 | 33.500  | 44.7319  | 34.8638  |            |    |      |    |             |                         |    |    |   |   |   |   |
|          |                        |                      |         |         | 32.000 | 26.000  | 45.6702  | 26.0000  |            |    |      |    |             |                         |    |    |   |   |   |   |

- Show detected proteins only  
 Show all proteins

Proteins found:  
1179

Filter by category:

ABC Transporter

Test

Cutoff

q-Value

.005

p-Value

|             | Signif | Direction | Applies To                |
|-------------|--------|-----------|---------------------------|
| Red         | yes    | +         | ratios, bars              |
| Yellow      | no     | n/a       | bars                      |
| Green       | yes    | -         | ratios, bars              |
| Pink        | yes    | +         | p <sup>-</sup> , q-Values |
| Light Green | yes    | -         | p <sup>-</sup> , q-Values |

Dot Plots Dot Plots

Summary Table

SgFn vs Sg

SgPg vs Sg

SgPgFn vs Sg

SgPg vs SgFn

SgPgFn vs SgFn

SgPgFn vs SgPg

Coverage

| Protein  | SgPg vs Sg             |                      |         |         | Raw     |         | Normalized |          | Description                                           | Log <sub>2</sub> Ratios |    |    |   |   |
|----------|------------------------|----------------------|---------|---------|---------|---------|------------|----------|-------------------------------------------------------|-------------------------|----|----|---|---|
|          | Log <sub>2</sub> Ratio | Log <sub>2</sub> Sum | q-Value | p-Value | SgPg    | Sg      | SgPg       | Sg       |                                                       | -6                      | -4 | -2 | 0 | 2 |
| SGO_1865 | -1.073                 | 7.288                | 0.0003  | 0.0003  | 17.000  | 48.500  | 25.3481    | 50.4744  | uvrA; excinuclease ABC, A subunit                     |                         |    |    |   |   |
|          |                        |                      |         |         | 17.500  | 55.500  | 24.9759    | 55.5000  |                                                       |                         |    |    |   |   |
| SGO_1866 |                        | 2.384                |         |         | 3.500   |         | 5.2187     |          | corA; magnesium and cobalt transporter                |                         |    |    |   |   |
|          |                        |                      |         |         |         |         |            |          |                                                       |                         |    |    |   |   |
| SGO_1867 | -0.785                 | 8.025                | 0.0012  | 0.0021  | 31.500  | 85.000  | 46.9685    | 88.4603  | hypothetical protein SGO_1867                         |                         |    |    |   |   |
|          |                        |                      |         |         | 34.000  | 76.500  | 48.5246    | 76.5000  |                                                       |                         |    |    |   |   |
| SGO_1869 |                        | 6.100                |         |         |         | 27.000  |            | 28.0992  | hypothetical protein SGO_1869                         |                         |    |    |   |   |
|          |                        |                      |         |         |         | 40.500  |            | 40.5000  |                                                       |                         |    |    |   |   |
| SGO_1870 | -2.154                 | 6.573                | 0.0017  | 0.0036  | 5.000   | 31.500  | 7.4553     | 32.7824  | hypothetical protein SGO_1870                         |                         |    |    |   |   |
|          |                        |                      |         |         | 7.000   | 45.000  | 9.9904     | 45.0000  |                                                       |                         |    |    |   |   |
| SGO_1871 |                        | 5.486                |         |         |         | 20.000  |            | 20.8142  | lipoprotein, putative                                 |                         |    |    |   |   |
|          |                        |                      |         |         |         | 24.000  |            | 24.0000  |                                                       |                         |    |    |   |   |
| SGO_1872 | -2.042                 | 5.394                | 0.0376  | 0.1612  | 3.000   | 14.500  | 4.4732     | 15.0903  | hypothetical protein SGO_1872                         |                         |    |    |   |   |
|          |                        |                      |         |         |         | 22.500  |            | 22.5000  |                                                       |                         |    |    |   |   |
| SGO_1878 |                        | 3.674                |         |         |         | 6.500   |            | 6.7646   | transcriptional regulator, TetR family domain protein |                         |    |    |   |   |
|          |                        |                      |         |         |         | 6.000   |            | 6.0000   |                                                       |                         |    |    |   |   |
| SGO_1879 | 0.485                  | 7.843                | 0.0748  | 0.3573  | 46.000  | 28.000  | 68.5889    | 29.1399  | rpsR; ribosomal protein S18                           |                         |    |    |   |   |
|          |                        |                      |         |         | 42.000  | 72.000  | 59.9421    | 72.0000  |                                                       |                         |    |    |   |   |
| SGO_1880 | 1.077                  | 8.471                | 0.0008  | 0.0011  | 76.500  | 49.000  | 114.0664   | 50.9948  | ssb-1; single-strand binding protein                  |                         |    |    |   |   |
|          |                        |                      |         |         | 88.500  | 63.500  | 126.3066   | 63.5000  |                                                       |                         |    |    |   |   |
| SGO_1881 | 0.807                  | 9.782                | 0.0045  | 0.0123  | 214.000 | 146.500 | 319.0876   | 152.4640 | rpsF; ribosomal protein S6                            |                         |    |    |   |   |
|          |                        |                      |         |         | 170.000 | 166.000 | 242.6229   | 166.0000 |                                                       |                         |    |    |   |   |
| SGO_1882 | 1.566                  | 6.032                | 0.0038  | 0.0099  | 13.500  | 6.000   | 20.1294    | 6.2443   | foIE; GTP cyclohydrolase I                            |                         |    |    |   |   |
|          |                        |                      |         |         | 20.000  | 10.500  | 28.5439    | 10.5000  |                                                       |                         |    |    |   |   |

- Show detected proteins only
- Show all proteins

Proteins found:  
1179

Filter by category:

ABC Transporter

Test

Cutoff

q-Value

p-Value

.005

|  | Signif | Direction | Applies To   |
|--|--------|-----------|--------------|
|  | yes    | +         | ratios, bars |
|  | no     | n/a       | bars         |
|  | yes    | -         | ratios, bars |
|  | yes    | +         | p-, q-Values |
|  | yes    | -         | p-, q-Values |

Dot Plots  Dot Plots

Summary Table

SgFn vs Sg

SgPg vs Sg

SgPgFn vs Sg

SgPg vs SgFn

SgPgFn vs SgFn

SgPgFn vs SgPg

Coverage

| Protein  | SgPg vs Sg             |                      |         |         | Raw     |         | Normalized |          | Description                                                     | Log <sub>2</sub> Ratios |    |    |   |   |   |   |
|----------|------------------------|----------------------|---------|---------|---------|---------|------------|----------|-----------------------------------------------------------------|-------------------------|----|----|---|---|---|---|
|          | Log <sub>2</sub> Ratio | Log <sub>2</sub> Sum | q-Value | p-Value | SgPg    | Sg      | SgPg       | Sg       |                                                                 | -6                      | -4 | -2 | 0 | 2 | 4 | 6 |
| SGO_1884 |                        | 4.239                |         |         |         | 9.500   |            | 9.8867   | hypothetical protein SGO_1884                                   |                         |    |    |   |   |   |   |
|          |                        |                      |         |         |         | 9.000   |            | 9.0000   |                                                                 |                         |    |    |   |   |   |   |
| SGO_1885 | 0.544                  | 9.965                | 0.0001  | 0.0000  | 200.000 | 198.500 | 298.2128   | 206.5809 | groL; 60 kDa chaperonin/groEL protein                           |                         |    |    |   |   |   |   |
|          |                        |                      |         |         | 206.500 | 200.000 | 294.7154   | 200.0000 |                                                                 |                         |    |    |   |   |   |   |
| SGO_1886 | -0.062                 | 6.280                | 0.1835  | 0.9903  | 17.000  | 20.000  | 25.3481    | 20.8142  | groES; chaperonin, 10 kDa                                       |                         |    |    |   |   |   |   |
|          |                        |                      |         |         | 9.500   | 18.000  | 13.5583    | 18.0000  |                                                                 |                         |    |    |   |   |   |   |
| SGO_1887 |                        | 4.785                |         |         |         | 14.000  |            | 14.5699  | ABC transporter, ATP-binding protein                            |                         |    |    |   |   |   |   |
|          |                        |                      |         |         |         | 13.000  |            | 13.0000  |                                                                 |                         |    |    |   |   |   |   |
| SGO_1888 |                        | 3.936                |         |         |         | 7.500   |            | 7.8053   | ABC transporter, permease protein                               |                         |    |    |   |   |   |   |
|          |                        |                      |         |         |         | 7.500   |            | 7.5000   |                                                                 |                         |    |    |   |   |   |   |
| SGO_1890 |                        | 4.754                |         |         |         | 12.000  |            | 12.4885  | PTS system, fructose(mannose)-specific IID                      |                         |    |    |   |   |   |   |
|          |                        |                      |         |         |         | 14.500  |            | 14.5000  |                                                                 |                         |    |    |   |   |   |   |
| SGO_1891 |                        | 5.077                |         |         |         | 18.500  |            | 19.2531  | PTS system, IIC component                                       |                         |    |    |   |   |   |   |
|          |                        |                      |         |         |         | 14.500  |            | 14.5000  |                                                                 |                         |    |    |   |   |   |   |
| SGO_1892 | -0.655                 | 6.579                | 0.0076  | 0.0233  | 11.000  | 24.500  | 16.4017    | 25.4974  | PTS system, fructose(mannose)-specific IIB                      |                         |    |    |   |   |   |   |
|          |                        |                      |         |         | 14.500  | 33.000  | 20.6943    | 33.0000  |                                                                 |                         |    |    |   |   |   |   |
| SGO_1894 |                        | 3.832                |         |         |         | 6.000   |            | 6.2443   | sugar-binding cell envelope protein                             |                         |    |    |   |   |   |   |
|          |                        |                      |         |         |         | 8.000   |            | 8.0000   |                                                                 |                         |    |    |   |   |   |   |
| SGO_1895 |                        | 2.202                |         |         |         | 2.500   |            | 2.6018   | response regulator                                              |                         |    |    |   |   |   |   |
|          |                        |                      |         |         |         | 2.000   |            | 2.0000   |                                                                 |                         |    |    |   |   |   |   |
| SGO_1897 |                        | 3.776                |         |         |         | 5.000   |            | 5.2035   | rbsB; ribose ABC transporter (ribose-binding component) CAC1453 |                         |    |    |   |   |   |   |
|          |                        |                      |         |         |         | 8.500   |            | 8.5000   |                                                                 |                         |    |    |   |   |   |   |
| SGO_1898 | 0.820                  | 7.993                | 0.0003  | 0.0002  | 53.500  | 42.000  | 79.7719    | 43.7098  | glutamyl aminopeptidase                                         |                         |    |    |   |   |   |   |
|          |                        |                      |         |         | 58.000  | 48.500  | 82.7772    | 48.5000  |                                                                 |                         |    |    |   |   |   |   |

- Show detected proteins only
- Show all proteins

Proteins found: 1179

Filter by category:

ABC Transporter

Test

Cutoff

q-Value

.005

p-Value

|             | Signif | Direction | Applies To   |
|-------------|--------|-----------|--------------|
| Red         | yes    | +         | ratios, bars |
| Yellow      | no     | n/a       | bars         |
| Green       | yes    | -         | ratios, bars |
| Pink        | yes    | +         | p-, q-Values |
| Light Green | yes    | -         | p-, q-Values |

Dot Plots Dot Plots

Summary Table

SgFn vs Sg

SgPg vs Sg

SgPgFn vs Sg

SgPg vs SgFn

SgPgFn vs SgFn

SgPgFn vs SgPg

Coverage

SgPg vs Sg

Raw

Normalized

Log<sub>2</sub> Ratios

| Protein  | SgPg vs Sg             |                      |         |         | Raw     |         | Normalized |          | Description                              | Log <sub>2</sub> Ratios |    |    |   |   |   |   |
|----------|------------------------|----------------------|---------|---------|---------|---------|------------|----------|------------------------------------------|-------------------------|----|----|---|---|---|---|
|          | Log <sub>2</sub> Ratio | Log <sub>2</sub> Sum | q-Value | p-Value | SgPg    | Sg      | SgPg       | Sg       |                                          | -6                      | -4 | -2 | 0 | 2 | 4 | 6 |
| SGO_1899 |                        | 2.700                |         |         |         |         |            |          | hypothetical protein SGO_1899            |                         |    |    |   |   |   |   |
|          |                        |                      |         |         |         | 6.500   |            | 6.5000   |                                          |                         |    |    |   |   |   |   |
| SGO_1900 | 0.545                  | 3.292                | 0.0127  | 0.0442  | 2.500   |         | 3.7277     |          | thioredoxin family protein               |                         |    |    |   |   |   |   |
|          |                        |                      |         |         | 2.500   | 2.500   | 3.5680     | 2.5000   |                                          |                         |    |    |   |   |   |   |
| SGO_1901 | 1.151                  | 6.682                | 0.0048  | 0.0136  | 28.000  | 17.000  | 41.7498    | 17.6921  | tRNA binding domain                      |                         |    |    |   |   |   |   |
|          |                        |                      |         |         | 20.500  | 14.000  | 29.2575    | 14.0000  |                                          |                         |    |    |   |   |   |   |
| SGO_1902 | 1.319                  | 10.098               | 0.0015  | 0.0028  | 291.000 | 137.000 | 433.8996   | 142.5772 | ssb; single-stranded DNA-binding protein |                         |    |    |   |   |   |   |
|          |                        |                      |         |         | 244.500 | 170.500 | 348.9488   | 170.5000 |                                          |                         |    |    |   |   |   |   |
| SGO_1903 | -0.014                 | 8.113                | 0.1490  | 0.7754  | 44.500  | 64.000  | 66.3523    | 66.6054  | ATP-dependent Zn protease                |                         |    |    |   |   |   |   |
|          |                        |                      |         |         | 50.000  | 72.500  | 71.3597    | 72.5000  |                                          |                         |    |    |   |   |   |   |
| SGO_1907 |                        | 2.170                |         |         |         |         |            |          | sensor protein                           |                         |    |    |   |   |   |   |
|          |                        |                      |         |         |         | 4.500   |            | 4.5000   |                                          |                         |    |    |   |   |   |   |
| SGO_1912 | 1.890                  | 4.365                | 0.0007  | 0.0009  | 5.500   | 1.500   | 8.2009     | 1.5611   | Bifunctional folate synthesis protein    |                         |    |    |   |   |   |   |
|          |                        |                      |         |         | 5.500   | 3.000   | 7.8496     | 3.0000   |                                          |                         |    |    |   |   |   |   |
| SGO_1914 | 0.948                  | 3.872                | 0.0322  | 0.1338  | 3.500   |         | 5.2187     |          | folP; dihydropteroate synthase           |                         |    |    |   |   |   |   |
|          |                        |                      |         |         | 4.500   | 3.000   | 6.4224     | 3.0000   |                                          |                         |    |    |   |   |   |   |
| SGO_1916 | 0.394                  | 8.528                | 0.0030  | 0.0074  | 70.500  | 70.500  | 105.1200   | 73.3700  | ackA; acetate kinase                     |                         |    |    |   |   |   |   |
|          |                        |                      |         |         | 73.000  | 86.500  | 104.1851   | 86.5000  |                                          |                         |    |    |   |   |   |   |
| SGO_1917 | 0.982                  | 5.136                | 0.0039  | 0.0104  | 9.000   | 6.000   | 13.4196    | 6.2443   | hypothetical protein SGO_1917            |                         |    |    |   |   |   |   |
|          |                        |                      |         |         | 7.000   | 5.500   | 9.9904     | 5.5000   |                                          |                         |    |    |   |   |   |   |
| SGO_1923 |                        | 2.865                |         |         |         | 7.000   |            | 7.2850   | comYB; competence protein                |                         |    |    |   |   |   |   |
|          |                        |                      |         |         |         |         |            |          |                                          |                         |    |    |   |   |   |   |
| SGO_1924 | -2.018                 | 8.576                | 0.0002  | 0.0001  | 21.500  | 142.000 | 32.0579    | 147.7808 | comYA; competence protein comYA          |                         |    |    |   |   |   |   |
|          |                        |                      |         |         | 31.000  | 157.500 | 44.2430    | 157.5000 |                                          |                         |    |    |   |   |   |   |

 Show detected proteins only Show all proteinsProteins found:  
1179 Filter by category:

ABC Transporter

Test

Cutoff

q-Value

.005

p-Value

|             | Signif | Direction | Applies To   |
|-------------|--------|-----------|--------------|
| Red         | yes    | +         | ratios, bars |
| Yellow      | no     | n/a       | bars         |
| Green       | yes    | -         | ratios, bars |
| Pink        | yes    | +         | p-, q-Values |
| Light Green | yes    | -         | p-, q-Values |

Dot Plots Dot Plots



Summary Table

SgFn vs Sg

SgPg vs Sg

SgPgFn vs Sg

SgPg vs SgFn

SgPgFn vs SgFn

SgPgFn vs SgPg

Coverage

| Protein  | SgPg vs Sg             |                      |         |         | Raw     |         | Normalized |          | Description                                              | Log <sub>2</sub> Ratios |    |    |   |   |
|----------|------------------------|----------------------|---------|---------|---------|---------|------------|----------|----------------------------------------------------------|-------------------------|----|----|---|---|
|          | Log <sub>2</sub> Ratio | Log <sub>2</sub> Sum | q-Value | p-Value | SgPg    | Sg      | SgPg       | Sg       |                                                          | -6                      | -4 | -2 | 0 | 2 |
| SGO_1926 | 0.180                  | 10.573               | 0.0033  | 0.0081  | 277.000 | 333.500 | 413.0247   | 347.0767 | rpoC; DNA-directed RNA polymerase, beta chain            |                         |    |    |   |   |
|          |                        |                      |         |         | 277.500 | 367.000 | 396.0462   | 367.0000 |                                                          |                         |    |    |   |   |
| SGO_1927 | -0.010                 | 10.434               | 0.1496  | 0.7797  | 228.000 | 347.000 | 339.9625   | 361.1262 | rpoB; DNA-directed RNA polymerase, beta subunit          |                         |    |    |   |   |
|          |                        |                      |         |         | 244.500 | 333.000 | 348.9488   | 333.0000 |                                                          |                         |    |    |   |   |
| SGO_1928 | -2.965                 | 7.544                | 0.0003  | 0.0003  | 7.000   | 73.500  | 10.4374    | 76.4922  | pbp1b; penicillin-binding protein 1B                     |                         |    |    |   |   |
|          |                        |                      |         |         | 7.500   | 89.000  | 10.7040    | 89.0000  |                                                          |                         |    |    |   |   |
| SGO_1929 | 1.093                  | 9.384                | 0.0010  | 0.0015  | 164.500 | 97.000  | 245.2800   | 100.9488 | tyrS; tyrosyl-tRNA synthetase                            |                         |    |    |   |   |
|          |                        |                      |         |         | 147.000 | 112.000 | 209.7974   | 112.0000 |                                                          |                         |    |    |   |   |
| SGO_1930 | 1.085                  | 4.520                | 0.0051  | 0.0145  | 5.500   | 2.500   | 8.2009     | 2.6018   | rrmA; Ribosomal RNA large subunit methyltransferase A    |                         |    |    |   |   |
|          |                        |                      |         |         | 5.000   | 5.000   | 7.1360     | 5.0000   |                                                          |                         |    |    |   |   |
| SGO_1931 |                        | 1.161                |         |         | 1.500   |         | 2.2366     |          | lipoprotein, putative                                    |                         |    |    |   |   |
|          |                        |                      |         |         |         |         |            |          |                                                          |                         |    |    |   |   |
| SGO_1934 |                        | 5.277                |         |         |         | 19.000  |            | 19.7735  | copper-translocating P-type ATPase                       |                         |    |    |   |   |
|          |                        |                      |         |         |         | 19.000  |            | 19.0000  |                                                          |                         |    |    |   |   |
| SGO_1935 |                        | 2.496                |         |         |         | 3.500   |            | 3.6425   | negative transcriptional regulator, CopY                 |                         |    |    |   |   |
|          |                        |                      |         |         |         | 2.000   |            | 2.0000   |                                                          |                         |    |    |   |   |
| SGO_1936 | -2.189                 | 8.974                | 0.0001  | 0.0000  | 32.000  | 193.500 | 47.7140    | 201.3773 | adcA; metal-binding (Mn) permease precursor, lipoprotein |                         |    |    |   |   |
|          |                        |                      |         |         | 30.000  | 211.000 | 42.8158    | 211.0000 |                                                          |                         |    |    |   |   |
| SGO_1938 | 0.029                  | 6.096                | 0.1771  | 0.9448  | 12.500  | 13.500  | 18.6383    | 14.0496  | adcC; ATP-binding protein, Mn                            |                         |    |    |   |   |
|          |                        |                      |         |         | 11.000  | 20.000  | 15.6991    | 20.0000  |                                                          |                         |    |    |   |   |
| SGO_1939 |                        | 2.321                |         |         |         |         |            |          | adcR; repressor protein adcR                             |                         |    |    |   |   |
|          |                        |                      |         |         | 3.500   |         | 4.9952     |          |                                                          |                         |    |    |   |   |
| SGO_1957 | -2.186                 | 4.917                | 0.0534  | 0.2415  |         | 9.000   |            | 9.3664   | hypothetical protein SGO_1957                            |                         |    |    |   |   |
|          |                        |                      |         |         | 2.000   | 18.000  | 2.8544     | 18.0000  |                                                          |                         |    |    |   |   |

- Show detected proteins only
- Show all proteins

Proteins found: 1179

Filter by category:

ABC Transporter

Test

Cutoff

q-Value

.005

p-Value

|             | Signif | Direction | Applies To   |
|-------------|--------|-----------|--------------|
| Red         | yes    | +         | ratios, bars |
| Yellow      | no     | n/a       | bars         |
| Green       | yes    | -         | ratios, bars |
| Pink        | yes    | +         | p-, q-Values |
| Light Green | yes    | -         | p-, q-Values |

Dot Plots Dot Plots

Summary Table

SgFn vs Sg

SgPg vs Sg

SgPgFn vs Sg

SgPg vs SgFn

SgPgFn vs SgFn

SgPgFn vs SgPg

Coverage

| Protein  | SgPg vs Sg             |                      |         |         | Raw     |         | Normalized |          | Description                                        | Log <sub>2</sub> Ratios |    |    |   |   |
|----------|------------------------|----------------------|---------|---------|---------|---------|------------|----------|----------------------------------------------------|-------------------------|----|----|---|---|
|          | Log <sub>2</sub> Ratio | Log <sub>2</sub> Sum | q-Value | p-Value | SgPg    | Sg      | SgPg       | Sg       |                                                    | -6                      | -4 | -2 | 0 | 2 |
| SGO_1958 | 2.075                  | 10.247               | 0.0004  | 0.0003  | 350.000 | 127.000 | 521.8723   | 132.1701 | rplQ; ribosomal protein L17                        |                         |    |    |   |   |
|          |                        |                      |         |         | 321.500 | 102.000 | 458.8427   | 102.0000 |                                                    |                         |    |    |   |   |
| SGO_1959 | 0.482                  | 9.402                | 0.0056  | 0.0164  | 125.000 | 152.000 | 186.3830   | 158.1879 | rpoA; DNA-directed RNA polymerase, alpha subunit   |                         |    |    |   |   |
|          |                        |                      |         |         | 145.000 | 125.000 | 206.9430   | 125.0000 |                                                    |                         |    |    |   |   |
| SGO_1960 | 0.545                  | 8.234                | 0.0033  | 0.0080  | 56.500  | 64.500  | 84.2451    | 67.1258  | rpsK; ribosomal protein S11                        |                         |    |    |   |   |
|          |                        |                      |         |         | 66.000  | 55.500  | 94.1948    | 55.5000  |                                                    |                         |    |    |   |   |
| SGO_1961 | 1.499                  | 9.790                | 0.0003  | 0.0003  | 231.500 | 115.500 | 345.1813   | 120.2020 | rpsM; ribosomal protein S13p/S18e                  |                         |    |    |   |   |
|          |                        |                      |         |         | 216.500 | 111.000 | 308.9874   | 111.0000 |                                                    |                         |    |    |   |   |
| SGO_1962 |                        | 5.444                |         |         | 11.000  |         | 16.4017    |          | rpmJ; ribosomal protein L36                        |                         |    |    |   |   |
|          |                        |                      |         |         | 19.000  |         | 27.1167    |          |                                                    |                         |    |    |   |   |
| SGO_1964 | 0.047                  | 8.784                | 0.0231  | 0.0918  | 75.500  | 106.500 | 112.5753   | 110.8356 | adk; Adenylate kinase (ATP-AMP transphosphorylase) |                         |    |    |   |   |
|          |                        |                      |         |         | 78.000  | 106.000 | 111.3211   | 106.0000 |                                                    |                         |    |    |   |   |
| SGO_1965 | -1.375                 | 6.740                | 0.0004  | 0.0005  | 9.000   | 39.000  | 13.4196    | 40.5877  | Preprotein translocase secY subunit                |                         |    |    |   |   |
|          |                        |                      |         |         | 11.500  | 36.500  | 16.4127    | 36.5000  |                                                    |                         |    |    |   |   |
| SGO_1966 | 1.359                  | 8.989                | 0.0068  | 0.0207  | 94.000  | 64.500  | 140.1600   | 67.1258  | rplO; ribosomal protein L15                        |                         |    |    |   |   |
|          |                        |                      |         |         | 160.000 | 72.500  | 228.3509   | 72.5000  |                                                    |                         |    |    |   |   |
| SGO_1967 | 1.872                  | 8.702                | 0.0003  | 0.0002  | 116.000 | 42.000  | 172.9634   | 43.7098  | 50S ribosomal protein L30 -related protein         |                         |    |    |   |   |
|          |                        |                      |         |         | 108.000 | 45.500  | 154.1369   | 45.5000  |                                                    |                         |    |    |   |   |
| SGO_1968 | 0.640                  | 10.290               | 0.0024  | 0.0053  | 263.000 | 264.500 | 392.1498   | 275.2677 | rpsE; ribosomal protein S5                         |                         |    |    |   |   |
|          |                        |                      |         |         | 258.000 | 216.000 | 368.2159   | 216.0000 |                                                    |                         |    |    |   |   |
| SGO_1969 | 1.259                  | 10.158               | 0.0003  | 0.0003  | 270.500 | 182.000 | 403.3328   | 189.4092 | rplR; ribosomal protein L18                        |                         |    |    |   |   |
|          |                        |                      |         |         | 281.000 | 149.000 | 401.0414   | 149.0000 |                                                    |                         |    |    |   |   |
| SGO_1970 | -0.442                 | 10.269               | 0.0004  | 0.0004  | 178.500 | 349.000 | 266.1549   | 363.2077 | BL10; 50S ribosomal protein L6                     |                         |    |    |   |   |
|          |                        |                      |         |         | 180.000 | 347.500 | 256.8948   | 347.5000 |                                                    |                         |    |    |   |   |

- Show detected proteins only
- Show all proteins

Proteins found: 1179

Filter by category:

ABC Transporter

Test

Cutoff

q-Value

.005

p-Value

|             | Signif | Direction | Applies To   |
|-------------|--------|-----------|--------------|
| Red         | yes    | +         | ratios, bars |
| Yellow      | no     | n/a       | bars         |
| Green       | yes    | -         | ratios, bars |
| Pink        | yes    | +         | p-, q-Values |
| Light Green | yes    | -         | p-, q-Values |

Dot Plots Dot Plots

Summary Table

SgFn vs Sg

SgPg vs Sg

SgPgFn vs Sg

SgPg vs SgFn

SgPgFn vs SgFn

SgPgFn vs SgPg

Coverage

| Protein  | SgPg vs Sg             |                      |         |         | Raw     |         |          |          | Normalized |    |      |    | Description | Log <sub>2</sub> Ratios |    |    |   |   |   |   |  |
|----------|------------------------|----------------------|---------|---------|---------|---------|----------|----------|------------|----|------|----|-------------|-------------------------|----|----|---|---|---|---|--|
|          | Log <sub>2</sub> Ratio | Log <sub>2</sub> Sum | q-Value | p-Value | SgPg    | Sg      | SgPg     | Sg       | SgPg       | Sg | SgPg | Sg |             | -6                      | -4 | -2 | 0 | 2 | 4 | 6 |  |
| SGO_1971 | 0.875                  | 10.836               | 0.0004  | 0.0005  | 411.500 | 326.500 | 613.5727 | 339.7917 |            |    |      |    |             |                         |    |    |   |   |   |   |  |
|          |                        |                      |         |         | 398.500 | 305.500 | 568.7366 | 305.5000 |            |    |      |    |             |                         |    |    |   |   |   |   |  |
| SGO_1972 |                        | 5.340                |         |         |         |         |          |          |            |    |      |    |             |                         |    |    |   |   |   |   |  |
|          |                        |                      |         |         |         | 40.500  |          | 40.5000  |            |    |      |    |             |                         |    |    |   |   |   |   |  |
| SGO_1973 | 0.314                  | 9.963                | 0.0026  | 0.0060  | 189.500 | 202.500 | 282.5566 | 210.7437 |            |    |      |    |             |                         |    |    |   |   |   |   |  |
|          |                        |                      |         |         | 189.500 | 234.500 | 270.4532 | 234.5000 |            |    |      |    |             |                         |    |    |   |   |   |   |  |
| SGO_1974 | -0.172                 | 8.962                | 0.0595  | 0.2735  | 74.500  | 147.000 | 111.0843 | 152.9843 |            |    |      |    |             |                         |    |    |   |   |   |   |  |
|          |                        |                      |         |         | 85.500  | 112.500 | 122.0250 | 112.5000 |            |    |      |    |             |                         |    |    |   |   |   |   |  |
| SGO_1975 | 0.740                  | 8.750                | 0.0003  | 0.0003  | 92.500  | 80.500  | 137.9234 | 83.7771  |            |    |      |    |             |                         |    |    |   |   |   |   |  |
|          |                        |                      |         |         | 92.000  | 77.500  | 131.3018 | 77.5000  |            |    |      |    |             |                         |    |    |   |   |   |   |  |
| SGO_1976 | 2.575                  | 8.892                | 0.0008  | 0.0012  | 121.500 | 45.500  | 181.1642 | 47.3523  |            |    |      |    |             |                         |    |    |   |   |   |   |  |
|          |                        |                      |         |         | 156.000 | 24.000  | 222.6422 | 24.0000  |            |    |      |    |             |                         |    |    |   |   |   |   |  |
| SGO_1977 | 0.014                  | 6.513                | 0.1779  | 0.9553  | 13.500  | 25.000  | 20.1294  | 26.0177  |            |    |      |    |             |                         |    |    |   |   |   |   |  |
|          |                        |                      |         |         | 18.000  | 19.500  | 25.6895  | 19.5000  |            |    |      |    |             |                         |    |    |   |   |   |   |  |
| SGO_1978 | 1.442                  | 8.829                | 0.0015  | 0.0028  | 110.500 | 42.500  | 164.7625 | 44.2302  |            |    |      |    |             |                         |    |    |   |   |   |   |  |
|          |                        |                      |         |         | 114.500 | 82.500  | 163.4136 | 82.5000  |            |    |      |    |             |                         |    |    |   |   |   |   |  |
| SGO_1979 | -0.999                 | 10.334               | 0.0003  | 0.0002  | 148.000 | 429.000 | 220.6774 | 446.4644 |            |    |      |    |             |                         |    |    |   |   |   |   |  |
|          |                        |                      |         |         | 147.000 | 414.000 | 209.7974 | 414.0000 |            |    |      |    |             |                         |    |    |   |   |   |   |  |
| SGO_1980 | 0.869                  | 9.533                | 0.0003  | 0.0003  | 164.000 | 134.000 | 244.5345 | 139.4551 |            |    |      |    |             |                         |    |    |   |   |   |   |  |
|          |                        |                      |         |         | 164.000 | 123.000 | 234.0597 | 123.0000 |            |    |      |    |             |                         |    |    |   |   |   |   |  |
| SGO_1981 | -0.198                 | 9.418                | 0.0320  | 0.1328  | 100.000 | 159.000 | 149.1064 | 165.4728 |            |    |      |    |             |                         |    |    |   |   |   |   |  |
|          |                        |                      |         |         | 118.500 | 200.500 | 169.1224 | 200.5000 |            |    |      |    |             |                         |    |    |   |   |   |   |  |
| SGO_1982 | 0.327                  | 9.069                | 0.0196  | 0.0760  | 107.000 | 99.500  | 159.5438 | 103.5506 |            |    |      |    |             |                         |    |    |   |   |   |   |  |
|          |                        |                      |         |         | 97.000  | 135.500 | 138.4378 | 135.5000 |            |    |      |    |             |                         |    |    |   |   |   |   |  |

- Show detected proteins only
- Show all proteins

Proteins found: 1179

Filter by category:

ABC Transporter

Test

Cutoff

q-Value

p-Value

.005

| Signif | Direction | Applies To   |
|--------|-----------|--------------|
| yes    | +         | ratios, bars |
| no     | n/a       | bars         |
| yes    | -         | ratios, bars |
| yes    | +         | p-, q-Values |
| yes    | -         | p-, q-Values |

Dot Plots Dot Plots

Summary Table

SgFn vs Sg

SgPg vs Sg

SgPgFn vs Sg

SgPg vs SgFn

SgPgFn vs SgFn

SgPgFn vs SgPg

Coverage

SgPg vs Sg

Raw

Normalized

Log<sub>2</sub> Ratios

| Protein  | SgPg vs Sg             |                      |         |         | Raw     |         | Normalized |          | Description                                                      | Log <sub>2</sub> Ratios |    |    |   |   |   |   |
|----------|------------------------|----------------------|---------|---------|---------|---------|------------|----------|------------------------------------------------------------------|-------------------------|----|----|---|---|---|---|
|          | Log <sub>2</sub> Ratio | Log <sub>2</sub> Sum | q-Value | p-Value | SgPg    | Sg      | SgPg       | Sg       |                                                                  | -6                      | -4 | -2 | 0 | 2 | 4 | 6 |
| SGO_1983 | -0.214                 | 8.948                | 0.0580  | 0.2650  | 91.000  | 130.000 | 135.6868   | 135.2923 | rplW; ribosomal protein L23                                      |                         |    |    |   |   |   |   |
|          |                        |                      |         |         | 66.500  | 128.000 | 94.9084    | 128.0000 |                                                                  |                         |    |    |   |   |   |   |
| SGO_1984 | 0.821                  | 9.611                | 0.0017  | 0.0035  | 158.000 | 153.000 | 235.5881   | 159.2286 | rplD; ribosomal protein L4/L1 family                             |                         |    |    |   |   |   |   |
|          |                        |                      |         |         | 184.000 | 124.500 | 262.6036   | 124.5000 |                                                                  |                         |    |    |   |   |   |   |
| SGO_1985 | 2.375                  | 10.178               | 0.0072  | 0.0217  | 223.000 | 80.000  | 332.5072   | 83.2568  | rplC; ribosomal protein L3                                       |                         |    |    |   |   |   |   |
|          |                        |                      |         |         | 453.000 | 96.000  | 646.5186   | 96.0000  |                                                                  |                         |    |    |   |   |   |   |
| SGO_1986 | 0.450                  | 7.881                | 0.0131  | 0.0458  | 42.500  | 56.000  | 63.3702    | 58.2797  | rpsJ; ribosomal protein S10                                      |                         |    |    |   |   |   |   |
|          |                        |                      |         |         | 50.500  | 42.000  | 72.0733    | 42.0000  |                                                                  |                         |    |    |   |   |   |   |
| SGO_1988 |                        | 4.572                |         |         |         | 7.000   |            | 7.2850   | hydrolase, haloacid dehalogenase-like family                     |                         |    |    |   |   |   |   |
|          |                        |                      |         |         |         | 16.500  |            | 16.5000  |                                                                  |                         |    |    |   |   |   |   |
| SGO_1989 | 1.403                  | 9.800                | 0.0003  | 0.0002  | 226.500 | 109.500 | 337.7259   | 113.9577 | purA; adenylosuccinate synthetase                                |                         |    |    |   |   |   |   |
|          |                        |                      |         |         | 216.500 | 131.000 | 308.9874   | 131.0000 |                                                                  |                         |    |    |   |   |   |   |
| SGO_1990 | 1.608                  | 5.146                | 0.0122  | 0.0419  | 6.000   | 3.000   | 8.9464     | 3.1221   | glutamate--cysteine ligase, putative/amino acid ligase, putative |                         |    |    |   |   |   |   |
|          |                        |                      |         |         | 12.500  | 5.500   | 17.8399    | 5.5000   |                                                                  |                         |    |    |   |   |   |   |
| SGO_1991 | -0.388                 | 4.635                | 0.0674  | 0.3156  | 3.000   | 4.000   | 4.4732     | 4.1628   | hsI0; 33 kDa chaperonin /Heat shock protein 33-like protein      |                         |    |    |   |   |   |   |
|          |                        |                      |         |         | 4.000   | 10.500  | 5.7088     | 10.5000  |                                                                  |                         |    |    |   |   |   |   |
| SGO_1993 | -0.453                 | 7.226                | 0.0175  | 0.0657  | 22.500  | 35.000  | 33.5489    | 36.4248  | possible transcriptional regulator                               |                         |    |    |   |   |   |   |
|          |                        |                      |         |         | 20.500  | 50.500  | 29.2575    | 50.5000  |                                                                  |                         |    |    |   |   |   |   |
| SGO_1994 |                        | 1.380                |         |         |         | 2.500   |            | 2.6018   | lipoprotein, putative                                            |                         |    |    |   |   |   |   |
|          |                        |                      |         |         |         |         |            |          |                                                                  |                         |    |    |   |   |   |   |
| SGO_1995 |                        | 4.654                |         |         |         | 16.500  |            | 17.1717  | MutT/nudix family protein                                        |                         |    |    |   |   |   |   |
|          |                        |                      |         |         |         | 8.000   |            | 8.0000   |                                                                  |                         |    |    |   |   |   |   |
| SGO_1998 | -0.061                 | 7.292                | 0.1442  | 0.7455  | 22.000  | 41.000  | 32.8034    | 42.6691  | clpB; ATP-dependent Clp proteinase, ATP-binding chain            |                         |    |    |   |   |   |   |
|          |                        |                      |         |         | 31.000  | 37.000  | 44.2430    | 37.0000  |                                                                  |                         |    |    |   |   |   |   |

- Show detected proteins only  
 Show all proteins

Proteins found:  
1179

Filter by category:

ABC Transporter

Test

Cutoff

q-Value

.005

p-Value

|             | Signif | Direction | Applies To   |
|-------------|--------|-----------|--------------|
| Red         | yes    | +         | ratios, bars |
| Yellow      | no     | n/a       | bars         |
| Green       | yes    | -         | ratios, bars |
| Pink        | yes    | +         | p-, q-Values |
| Light Green | yes    | -         | p-, q-Values |

Dot Plots Dot Plots

Summary Table

SgFn vs Sg

SgPg vs Sg

SgPgFn vs Sg

SgPg vs SgFn

SgPgFn vs SgFn

SgPgFn vs SgPg

Coverage

SgPg vs Sg

Raw

Normalized

Log<sub>2</sub> Ratios

| Protein  | SgPg vs Sg             |                      |         |         | Raw     |         |          |          | Normalized |    |      |    | Description | Log <sub>2</sub> Ratios |    |    |   |   |   |   |
|----------|------------------------|----------------------|---------|---------|---------|---------|----------|----------|------------|----|------|----|-------------|-------------------------|----|----|---|---|---|---|
|          | Log <sub>2</sub> Ratio | Log <sub>2</sub> Sum | q-Value | p-Value | SgPg    | Sg      | SgPg     | Sg       | SgPg       | Sg | SgPg | Sg |             | -6                      | -4 | -2 | 0 | 2 | 4 | 6 |
| SGO_2000 | 0.557                  | 11.062               | 0.0011  | 0.0018  | 437.500 | 443.500 | 652.3404 | 461.5547 |            |    |      |    |             |                         |    |    |   |   |   |   |
|          |                        |                      |         |         | 434.000 | 404.500 | 619.4019 | 404.5000 |            |    |      |    |             |                         |    |    |   |   |   |   |
| SGO_2001 | 0.163                  | 10.895               | 0.0136  | 0.0480  | 347.500 | 455.000 | 518.1447 | 473.5229 |            |    |      |    |             |                         |    |    |   |   |   |   |
|          |                        |                      |         |         | 341.500 | 425.500 | 487.3866 | 425.5000 |            |    |      |    |             |                         |    |    |   |   |   |   |
| SGO_2004 |                        | 6.780                |         |         |         | 46.000  |          | 47.8726  |            |    |      |    |             |                         |    |    |   |   |   |   |
|          |                        |                      |         |         |         | 62.000  |          | 62.0000  |            |    |      |    |             |                         |    |    |   |   |   |   |
| SGO_2005 | -4.964                 | 9.595                | 0.0002  | 0.0001  | 7.500   | 379.000 | 11.1830  | 394.4289 |            |    |      |    |             |                         |    |    |   |   |   |   |
|          |                        |                      |         |         | 9.000   | 355.000 | 12.8447  | 355.0000 |            |    |      |    |             |                         |    |    |   |   |   |   |
| SGO_2006 |                        | 3.279                |         |         |         | 5.000   |          | 5.2035   |            |    |      |    |             |                         |    |    |   |   |   |   |
|          |                        |                      |         |         |         | 4.500   |          | 4.5000   |            |    |      |    |             |                         |    |    |   |   |   |   |
| SGO_2007 | -0.015                 | 7.182                | 0.1504  | 0.7846  | 25.500  | 35.500  | 38.0221  | 36.9452  |            |    |      |    |             |                         |    |    |   |   |   |   |
|          |                        |                      |         |         | 24.000  | 36.000  | 34.2526  | 36.0000  |            |    |      |    |             |                         |    |    |   |   |   |   |
| SGO_2008 |                        | 5.872                |         |         |         | 26.500  |          | 27.5788  |            |    |      |    |             |                         |    |    |   |   |   |   |
|          |                        |                      |         |         |         | 31.000  |          | 31.0000  |            |    |      |    |             |                         |    |    |   |   |   |   |
| SGO_2010 |                        | 6.259                |         |         |         | 38.500  |          | 40.0673  |            |    |      |    |             |                         |    |    |   |   |   |   |
|          |                        |                      |         |         |         | 36.500  |          | 36.5000  |            |    |      |    |             |                         |    |    |   |   |   |   |
| SGO_2013 |                        | 8.980                |         |         |         | 248.500 |          | 258.6163 |            |    |      |    |             |                         |    |    |   |   |   |   |
|          |                        |                      |         |         |         | 246.500 |          | 246.5000 |            |    |      |    |             |                         |    |    |   |   |   |   |
| SGO_2015 |                        | 0.585                |         |         |         |         |          |          |            |    |      |    |             |                         |    |    |   |   |   |   |
|          |                        |                      |         |         |         | 1.500   |          | 1.5000   |            |    |      |    |             |                         |    |    |   |   |   |   |
| SGO_2016 |                        | 2.170                |         |         |         |         |          |          |            |    |      |    |             |                         |    |    |   |   |   |   |
|          |                        |                      |         |         |         | 4.500   |          | 4.5000   |            |    |      |    |             |                         |    |    |   |   |   |   |
| SGO_2017 | -0.539                 | 3.456                |         |         | 3.000   |         | 4.4732   |          |            |    |      |    |             |                         |    |    |   |   |   |   |
|          |                        |                      |         |         |         | 6.500   |          | 6.5000   |            |    |      |    |             |                         |    |    |   |   |   |   |

- Show detected proteins only  
 Show all proteins

Proteins found:  
1179

Filter by category:

ABC Transporter

Test

Cutoff

q-Value

.005

p-Value

|             | Signif | Direction | Applies To   |
|-------------|--------|-----------|--------------|
| Red         | yes    | +         | ratios, bars |
| Yellow      | no     | n/a       | bars         |
| Green       | yes    | -         | ratios, bars |
| Pink        | yes    | +         | p-, q-Values |
| Light Green | yes    | -         | p-, q-Values |

Dot Plots Dot Plots

Summary Table

SgFn vs Sg

SgPg vs Sg

SgPgFn vs Sg

SgPg vs SgFn

SgPgFn vs SgFn

SgPgFn vs SgPg

Coverage

| Protein  | SgPg vs Sg             |                      |         |         | Raw    |        | Normalized |         | Description                                               | Log <sub>2</sub> Ratios |    |    |   |   |
|----------|------------------------|----------------------|---------|---------|--------|--------|------------|---------|-----------------------------------------------------------|-------------------------|----|----|---|---|
|          | Log <sub>2</sub> Ratio | Log <sub>2</sub> Sum | q-Value | p-Value | SgPg   | Sg     | SgPg       | Sg      |                                                           | -6                      | -4 | -2 | 0 | 2 |
| SGO_2019 | -0.881                 | 5.633                | 0.0003  | 0.0002  | 5.500  | 15.500 | 8.2009     | 16.1310 | licD; licD3 protein                                       |                         |    |    |   |   |
|          |                        |                      |         |         | 6.500  | 16.000 | 9.2768     | 16.0000 |                                                           |                         |    |    |   |   |
| SGO_2020 |                        | 2.585                |         |         |        |        |            |         | glycosyltransferase                                       |                         |    |    |   |   |
|          |                        |                      |         |         |        | 6.000  |            | 6.0000  |                                                           |                         |    |    |   |   |
| SGO_2021 |                        | 5.271                |         |         |        | 15.000 |            | 15.6106 | Extracellular polysaccharide glycosyltransferase          |                         |    |    |   |   |
|          |                        |                      |         |         |        | 23.000 |            | 23.0000 |                                                           |                         |    |    |   |   |
| SGO_2022 |                        | 2.000                |         |         |        |        |            |         | UDP-glucose 4-epimerase BH3715                            |                         |    |    |   |   |
|          |                        |                      |         |         |        | 4.000  |            | 4.0000  |                                                           |                         |    |    |   |   |
| SGO_2023 |                        | 5.835                |         |         |        | 27.000 |            | 28.0992 | galactosyltransferase                                     |                         |    |    |   |   |
|          |                        |                      |         |         |        | 29.000 |            | 29.0000 |                                                           |                         |    |    |   |   |
| SGO_2024 | -1.523                 | 7.385                | 0.0014  | 0.0026  | 13.500 | 52.500 | 20.1294    | 54.6373 | Extracellular polysaccharide biosynthesis                 |                         |    |    |   |   |
|          |                        |                      |         |         | 16.000 | 69.500 | 22.8351    | 69.5000 |                                                           |                         |    |    |   |   |
| SGO_2025 | -0.304                 | 6.869                | 0.0257  | 0.1036  | 20.500 | 30.000 | 30.5668    | 31.2213 | wze; putative autophosphorylating protein tyrosine kinase |                         |    |    |   |   |
|          |                        |                      |         |         | 15.500 | 33.000 | 22.1215    | 33.0000 |                                                           |                         |    |    |   |   |
| SGO_2026 | -0.991                 | 6.710                | 0.0019  | 0.0042  | 11.000 | 30.000 | 16.4017    | 31.2213 | wzd; polysaccharide export protein, MPA1 family           |                         |    |    |   |   |
|          |                        |                      |         |         | 13.000 | 38.500 | 18.5535    | 38.5000 |                                                           |                         |    |    |   |   |
| SGO_2027 |                        | 2.170                |         |         |        |        |            |         | wzh; wzh/Putative phosphotyrosine-protein phosphatase     |                         |    |    |   |   |
|          |                        |                      |         |         |        | 4.500  |            | 4.5000  |                                                           |                         |    |    |   |   |
| SGO_2028 | -2.941                 | 6.130                | 0.0049  | 0.0138  |        | 31.000 |            | 32.2620 | wzg; transcriptional regulator                            |                         |    |    |   |   |
|          |                        |                      |         |         | 3.000  | 33.500 | 4.2816     | 33.5000 |                                                           |                         |    |    |   |   |
| SGO_2033 | -0.854                 | 7.763                | 0.0003  | 0.0002  | 26.500 | 69.500 | 39.5132    | 72.3293 | nrdD; ribonucleoside-triphosphate reductase               |                         |    |    |   |   |
|          |                        |                      |         |         | 26.500 | 67.500 | 37.8206    | 67.5000 |                                                           |                         |    |    |   |   |
| SGO_2034 | -1.989                 | 5.567                | 0.0362  | 0.1540  | 3.500  | 16.500 | 5.2187     | 17.1717 | hypothetical protein SGO_2034                             |                         |    |    |   |   |
|          |                        |                      |         |         |        | 25.000 |            | 25.0000 |                                                           |                         |    |    |   |   |

- Show detected proteins only
- Show all proteins

Proteins found: 1179

Filter by category:  
ABC Transporter

Test Cutoff

q-Value p-Value

.005

| Signif | Direction | Applies To   |
|--------|-----------|--------------|
| yes    | +         | ratios, bars |
| no     | n/a       | bars         |
| yes    | -         | ratios, bars |
| yes    | +         | p-, q-Values |
| yes    | -         | p-, q-Values |

Dot Plots Dot Plots

Summary Table SgFn vs Sg SgPg vs Sg SgPgFn vs Sg SgPg vs SgFn SgPgFn vs SgFn SgPgFn vs SgPg Coverage

| Protein  | SgPg vs Sg             |                      |         |         | Raw     |         | Normalized |          | Description                                                | Log <sub>2</sub> Ratios |    |    |   |   |   |   |
|----------|------------------------|----------------------|---------|---------|---------|---------|------------|----------|------------------------------------------------------------|-------------------------|----|----|---|---|---|---|
|          | Log <sub>2</sub> Ratio | Log <sub>2</sub> Sum | q-Value | p-Value | SgPg    | Sg      | SgPg       | Sg       |                                                            | -6                      | -4 | -2 | 0 | 2 | 4 | 6 |
| SGO_2037 |                        | 5.472                |         |         |         | 21.500  |            | 22.3753  | cardiolipin synthase                                       |                         |    |    |   |   |   |   |
|          |                        |                      |         |         |         | 22.000  |            | 22.0000  |                                                            |                         |    |    |   |   |   |   |
| SGO_2039 | -1.419                 | 3.789                | 0.0442  | 0.1931  |         | 4.500   |            | 4.6832   | dihydrofolate synthase                                     |                         |    |    |   |   |   |   |
|          |                        |                      |         |         | 1.500   | 7.000   | 2.1408     | 7.0000   |                                                            |                         |    |    |   |   |   |   |
| SGO_2041 | 1.335                  | 4.956                | 0.0032  | 0.0078  |         | 8.000   | 3.000      | 11.9285  | conserved hypothetical protein TIGR00250                   |                         |    |    |   |   |   |   |
|          |                        |                      |         |         | 7.000   | 6.000   | 9.9904     | 6.0000   |                                                            |                         |    |    |   |   |   |   |
| SGO_2042 | 2.054                  | 8.549                | 0.0006  | 0.0008  |         | 92.500  | 40.500     | 137.9234 | Bacterial protein of unknown function (DUF965) superfamily |                         |    |    |   |   |   |   |
|          |                        |                      |         |         | 114.500 | 31.000  | 163.4136   | 31.0000  |                                                            |                         |    |    |   |   |   |   |
| SGO_2043 | -2.954                 | 5.560                | 0.0127  | 0.0442  |         |         | 20.000     |          | lipoprotein, putative                                      |                         |    |    |   |   |   |   |
|          |                        |                      |         |         | 2.000   | 23.500  | 2.8544     | 23.5000  |                                                            |                         |    |    |   |   |   |   |
| SGO_2045 | 0.828                  | 10.862               | 0.0006  | 0.0008  |         | 389.500 | 294.500    | 580.7693 | recA; recA protein                                         |                         |    |    |   |   |   |   |
|          |                        |                      |         |         | 426.000 | 365.500 | 607.9844   | 365.5000 |                                                            |                         |    |    |   |   |   |   |
| SGO_2046 | 0.321                  | 5.625                | 0.0568  | 0.2580  |         | 9.500   | 8.000      | 14.1651  | cinA; competence induced protein                           |                         |    |    |   |   |   |   |
|          |                        |                      |         |         | 9.000   | 14.000  | 12.8447    | 14.0000  |                                                            |                         |    |    |   |   |   |   |
| SGO_2049 |                        | 1.000                |         |         |         |         |            |          | tagI; DNA-3-methyladenine glycosylase I                    |                         |    |    |   |   |   |   |
|          |                        |                      |         |         |         | 2.000   |            | 2.0000   |                                                            |                         |    |    |   |   |   |   |
| SGO_2050 | 1.259                  | 4.533                | 0.0163  | 0.0602  |         | 4.000   | 5.000      | 5.9643   | ruvA; Holliday junction DNA helicase RuvA                  |                         |    |    |   |   |   |   |
|          |                        |                      |         |         | 7.000   | 2.000   | 9.9904     | 2.0000   |                                                            |                         |    |    |   |   |   |   |
| SGO_2052 |                        | 3.000                |         |         |         |         |            |          | hypothetical protein SGO_2052                              |                         |    |    |   |   |   |   |
|          |                        |                      |         |         |         | 8.000   |            | 8.0000   |                                                            |                         |    |    |   |   |   |   |
| SGO_2053 | -1.164                 | 6.120                | 0.0053  | 0.0152  |         | 5.500   | 19.500     | 8.2009   | DNA mismatch repair protein hexB                           |                         |    |    |   |   |   |   |
|          |                        |                      |         |         | 9.500   | 27.500  | 13.5583    | 27.5000  |                                                            |                         |    |    |   |   |   |   |
| SGO_2056 | -0.084                 | 6.562                | 0.1403  | 0.7223  |         | 12.500  | 18.500     | 18.6383  | mutS; DNA mismatch repair protein MutS                     |                         |    |    |   |   |   |   |
|          |                        |                      |         |         | 19.000  | 29.500  | 27.1167    | 29.5000  |                                                            |                         |    |    |   |   |   |   |

Show detected proteins only  
 Show all proteins  
 Filter by category:

Proteins found: 1179

**Test**      **Cutoff**  
     

|             | Signif | Direction | Applies To   |
|-------------|--------|-----------|--------------|
| Red         | yes    | +         | ratios, bars |
| Yellow      | no     | n/a       | bars         |
| Green       | yes    | -         | ratios, bars |
| Pink        | yes    | +         | p-, q-Values |
| Light Green | yes    | -         | p-, q-Values |

Dot Plots  Dot Plots

Summary Table

SgFn vs Sg

SgPg vs Sg

SgPgFn vs Sg

SgPg vs SgFn

SgPgFn vs SgFn

SgPgFn vs SgPg

Coverage

| Protein  | SgPg vs Sg             |                      |         |         | Raw     |         | Normalized |          | Description                             | Log <sub>2</sub> Ratios |    |    |   |   |   |
|----------|------------------------|----------------------|---------|---------|---------|---------|------------|----------|-----------------------------------------|-------------------------|----|----|---|---|---|
|          | Log <sub>2</sub> Ratio | Log <sub>2</sub> Sum | q-Value | p-Value | SgPg    | Sg      | SgPg       | Sg       |                                         | -6                      | -4 | -2 | 0 | 2 | 4 |
| SGO_2057 |                        | 5.049                |         |         |         | 15.000  |            | 15.6106  | argR; arginine repressor                |                         |    |    |   |   |   |
|          |                        |                      |         |         |         | 17.500  |            | 17.5000  |                                         |                         |    |    |   |   |   |
| SGO_2058 | 0.451                  | 9.878                | 0.0008  | 0.0011  | 188.000 | 185.500 | 280.3200   | 193.0516 | argS; arginyl-tRNA synthetase           |                         |    |    |   |   |   |
|          |                        |                      |         |         | 184.500 | 204.500 | 263.3172   | 204.5000 |                                         |                         |    |    |   |   |   |
| SGO_2059 |                        | 2.058                |         |         |         | 4.000   |            | 4.1628   | hypothetical protein SGO_2059           |                         |    |    |   |   |   |
|          |                        |                      |         |         |         |         |            |          |                                         |                         |    |    |   |   |   |
| SGO_2060 | 0.996                  | 8.121                | 0.0014  | 0.0027  | 61.500  | 37.000  | 91.7004    | 38.5063  | aspS-1; aspartyl-tRNA synthetase        |                         |    |    |   |   |   |
|          |                        |                      |         |         | 65.000  | 55.500  | 92.7676    | 55.5000  |                                         |                         |    |    |   |   |   |
| SGO_2062 | 0.686                  | 8.464                | 0.0046  | 0.0126  | 77.500  | 55.000  | 115.5574   | 57.2390  | hisS; histidyl-tRNA synthetase          |                         |    |    |   |   |   |
|          |                        |                      |         |         | 71.000  | 79.000  | 101.3307   | 79.0000  |                                         |                         |    |    |   |   |   |
| SGO_2064 | 1.647                  | 8.986                | 0.0005  | 0.0006  | 138.000 | 54.500  | 205.7668   | 56.7187  | ilvD; dihydroxy-acid dehydratase        |                         |    |    |   |   |   |
|          |                        |                      |         |         | 125.000 | 66.000  | 178.3992   | 66.0000  |                                         |                         |    |    |   |   |   |
| SGO_2065 |                        |                      |         |         |         |         |            |          | rpmF; ribosomal protein L32             |                         |    |    |   |   |   |
|          |                        |                      |         |         |         |         |            |          |                                         |                         |    |    |   |   |   |
| SGO_2066 | 1.393                  | 7.977                | 0.0019  | 0.0041  | 66.500  | 42.000  | 99.1557    | 43.7098  | rpmG; ribosomal protein L33             |                         |    |    |   |   |   |
|          |                        |                      |         |         | 57.500  | 27.000  | 82.0636    | 27.0000  |                                         |                         |    |    |   |   |   |
| SGO_2070 | -0.247                 | 6.477                | 0.0921  | 0.4498  | 15.000  | 12.500  | 22.3660    | 13.0089  | hypothetical protein SGO_2070           |                         |    |    |   |   |   |
|          |                        |                      |         |         | 11.000  | 38.000  | 15.6991    | 38.0000  |                                         |                         |    |    |   |   |   |
| SGO_2073 |                        |                      |         |         |         |         |            |          | FtsK/SpoIIIE family subfamily, putative |                         |    |    |   |   |   |
|          |                        |                      |         |         |         |         |            |          |                                         |                         |    |    |   |   |   |
| SGO_2080 | -0.970                 | 5.772                | 0.0103  | 0.0343  | 4.500   | 20.000  | 6.7098     | 20.8142  | transcription activator plcR            |                         |    |    |   |   |   |
|          |                        |                      |         |         | 8.500   | 15.000  | 12.1311    | 15.0000  |                                         |                         |    |    |   |   |   |
| SGO_2081 | -2.513                 | 6.148                | 0.0099  | 0.0328  |         | 30.000  |            | 31.2213  | lipoprotein, putative                   |                         |    |    |   |   |   |
|          |                        |                      |         |         | 4.000   | 34.000  | 5.7088     | 34.0000  |                                         |                         |    |    |   |   |   |

- Show detected proteins only
- Show all proteins

Proteins found: 1179

Filter by category:

ABC Transporter

Test

Cutoff

q-Value

.005

p-Value

|             | Signif | Direction | Applies To   |
|-------------|--------|-----------|--------------|
| Red         | yes    | +         | ratios, bars |
| Yellow      | no     | n/a       | bars         |
| Green       | yes    | -         | ratios, bars |
| Pink        | yes    | +         | p-, q-Values |
| Light Green | yes    | -         | p-, q-Values |

Dot Plots Dot Plots



Summary Table

SgFn vs Sg

SgPg vs Sg

SgPgFn vs Sg

SgPg vs SgFn

SgPgFn vs SgFn

SgPgFn vs SgPg

Coverage

| Protein  | SgPg vs Sg             |                      |         |         | Raw     |         | Normalized |          | Description                                  | Log <sub>2</sub> Ratios |    |    |   |   |   |   |
|----------|------------------------|----------------------|---------|---------|---------|---------|------------|----------|----------------------------------------------|-------------------------|----|----|---|---|---|---|
|          | Log <sub>2</sub> Ratio | Log <sub>2</sub> Sum | q-Value | p-Value | SgPg    | Sg      | SgPg       | Sg       |                                              | -6                      | -4 | -2 | 0 | 2 | 4 | 6 |
| SGO_2082 |                        | 5.515                |         |         |         | 18.000  |            | 18.7328  | lipoprotein, putative                        |                         |    |    |   |   |   |   |
|          |                        |                      |         |         |         | 27.000  |            | 27.0000  |                                              |                         |    |    |   |   |   |   |
| SGO_2084 | -0.180                 | 4.686                | 0.0926  | 0.4531  |         | 9.500   |            | 9.8867   | NAD(P)H dehydrogenase, quinone family        |                         |    |    |   |   |   |   |
|          |                        |                      |         |         | 5.500   | 8.000   | 7.8496     | 8.0000   |                                              |                         |    |    |   |   |   |   |
| SGO_2085 | -0.211                 | 8.247                | 0.0036  | 0.0090  | 48.000  | 75.500  | 71.5711    | 78.5736  | purB; adenylosuccinate lyase                 |                         |    |    |   |   |   |   |
|          |                        |                      |         |         | 48.500  | 84.500  | 69.2189    | 84.5000  |                                              |                         |    |    |   |   |   |   |
| SGO_2086 |                        | 4.929                |         |         |         | 11.500  |            | 11.9682  | hypothetical protein SGO_2086                |                         |    |    |   |   |   |   |
|          |                        |                      |         |         |         | 18.500  |            | 18.5000  |                                              |                         |    |    |   |   |   |   |
| SGO_2094 |                        | 5.483                |         |         |         | 17.500  |            | 18.2124  | general stress protein GSP-781               |                         |    |    |   |   |   |   |
|          |                        |                      |         |         |         | 26.500  |            | 26.5000  |                                              |                         |    |    |   |   |   |   |
| SGO_2096 |                        | 8.836                |         |         |         | 210.000 |            | 218.5490 | comB; transport protein ComB                 |                         |    |    |   |   |   |   |
|          |                        |                      |         |         |         | 238.500 |            | 238.5000 |                                              |                         |    |    |   |   |   |   |
| SGO_2097 | -5.519                 | 10.002               | 0.0001  | 0.0000  | 7.500   | 493.500 | 11.1830    | 513.5902 | comA; ATP-binding Transport protein ComA     |                         |    |    |   |   |   |   |
|          |                        |                      |         |         | 7.500   | 490.000 | 10.7040    | 490.0000 |                                              |                         |    |    |   |   |   |   |
| SGO_2098 | 0.885                  | 11.230               | 0.0001  | 0.0001  | 519.500 | 388.500 | 774.6076   | 404.3157 | rpsD; ribosomal protein S4                   |                         |    |    |   |   |   |   |
|          |                        |                      |         |         | 548.500 | 440.000 | 782.8156   | 440.0000 |                                              |                         |    |    |   |   |   |   |
| SGO_2099 |                        | 3.098                |         |         |         |         |            |          | ABC transporter ATP-binding protein          |                         |    |    |   |   |   |   |
|          |                        |                      |         |         | 6.000   |         | 8.5632     |          |                                              |                         |    |    |   |   |   |   |
| SGO_2100 | 2.646                  | 8.845                | 0.0002  | 0.0001  | 140.500 | 32.000  | 209.4945   | 33.3027  | ABC transporter substrate-binding protein    |                         |    |    |   |   |   |   |
|          |                        |                      |         |         | 131.000 | 30.000  | 186.9623   | 30.0000  |                                              |                         |    |    |   |   |   |   |
| SGO_2102 |                        | 5.180                |         |         | 9.000   |         | 13.4196    |          | hypothetical protein SGO_2102                |                         |    |    |   |   |   |   |
|          |                        |                      |         |         | 16.000  |         | 22.8351    |          |                                              |                         |    |    |   |   |   |   |
| SGO_2103 |                        | 1.585                |         |         |         |         |            |          | hydrolase, haloacid dehalogenase-like family |                         |    |    |   |   |   |   |
|          |                        |                      |         |         |         | 3.000   |            | 3.0000   |                                              |                         |    |    |   |   |   |   |

Show detected proteins only  
 Show all proteins  
 Filter by category:

Proteins found: 1179

**Test**      **Cutoff**  
     

|             | Signif | Direction | Applies To   |
|-------------|--------|-----------|--------------|
| Red         | yes    | +         | ratios, bars |
| Yellow      | no     | n/a       | bars         |
| Green       | yes    | -         | ratios, bars |
| Pink        | yes    | +         | p-, q-Values |
| Light Green | yes    | -         | p-, q-Values |

Summary Table

SgFn vs Sg

SgPg vs Sg

SgPgFn vs Sg

SgPg vs SgFn

SgPgFn vs SgFn

SgPgFn vs SgPg

Coverage

SgPg vs Sg

Raw

Normalized

Log<sub>2</sub> Ratios

| Protein  | SgPg vs Sg             |                      |         |         | Raw     |          | Normalized |           | Description                                 | Log <sub>2</sub> Ratios |    |    |   |   |   |   |
|----------|------------------------|----------------------|---------|---------|---------|----------|------------|-----------|---------------------------------------------|-------------------------|----|----|---|---|---|---|
|          | Log <sub>2</sub> Ratio | Log <sub>2</sub> Sum | q-Value | p-Value | SgPg    | Sg       | SgPg       | Sg        |                                             | -6                      | -4 | -2 | 0 | 2 | 4 | 6 |
| SGO_2104 | -1.730                 | 9.606                | 0.0001  | 0.0000  | 55.000  | 291.000  | 82.0085    | 302.8465  | srtB; sortase B                             |                         |    |    |   |   |   |   |
|          |                        |                      |         |         | 69.500  | 295.500  | 99.1899    | 295.5000  |                                             |                         |    |    |   |   |   |   |
| SGO_2105 | -6.934                 | 12.327               | 0.0003  | 0.0003  | 15.000  | 2230.000 | 22.3660    | 2320.7824 | abpA; amylase-binding protein AbpA          |                         |    |    |   |   |   |   |
|          |                        |                      |         |         | 13.500  | 2777.000 | 19.2671    | 2777.0000 |                                             |                         |    |    |   |   |   |   |
| SGO_2106 | 0.037                  | 8.367                | 0.1120  | 0.5587  | 52.000  | 79.000   | 77.5353    | 82.2161   | ribose-phosphate diphosphokinase            |                         |    |    |   |   |   |   |
|          |                        |                      |         |         | 63.000  | 80.500   | 89.9132    | 80.5000   |                                             |                         |    |    |   |   |   |   |
| SGO_2107 |                        | 3.785                |         |         |         | 7.000    |            | 7.2850    | general stress protein GSP-781              |                         |    |    |   |   |   |   |
|          |                        |                      |         |         |         | 6.500    |            | 6.5000    |                                             |                         |    |    |   |   |   |   |
| SGO_2108 | -2.938                 | 6.651                | 0.0001  | 0.0000  | 4.500   | 44.000   | 6.7098     | 45.7912   | mreC; cell shape-determining protein MreC   |                         |    |    |   |   |   |   |
|          |                        |                      |         |         | 3.500   | 43.000   | 4.9952     | 43.0000   |                                             |                         |    |    |   |   |   |   |
| SGO_2133 | -1.361                 | 10.272               | 0.0002  | 0.0001  | 116.000 | 411.000  | 172.9634   | 427.7317  | Cell division protein ftsH-like protein     |                         |    |    |   |   |   |   |
|          |                        |                      |         |         | 121.500 | 462.500  | 173.4040   | 462.5000  |                                             |                         |    |    |   |   |   |   |
| SGO_2134 | -0.013                 | 7.764                | 0.1588  | 0.8316  | 37.500  | 62.500   | 55.9149    | 65.0444   | hpt; hypoxanthine phosphoribosyltransferase |                         |    |    |   |   |   |   |
|          |                        |                      |         |         | 36.000  | 45.000   | 51.3790    | 45.0000   |                                             |                         |    |    |   |   |   |   |
| SGO_2138 |                        | 2.322                |         |         |         |          |            |           | Septum formation initiator family           |                         |    |    |   |   |   |   |
|          |                        |                      |         |         |         | 5.000    |            | 5.0000    |                                             |                         |    |    |   |   |   |   |
| SGO_2139 |                        | 1.380                |         |         |         | 2.500    |            | 2.6018    | S4 RNA-binding domain protein               |                         |    |    |   |   |   |   |
|          |                        |                      |         |         |         |          |            |           |                                             |                         |    |    |   |   |   |   |
| SGO_2140 |                        | 3.667                |         |         |         | 5.000    |            | 5.2035    | transcription-repair coupling factor        |                         |    |    |   |   |   |   |
|          |                        |                      |         |         |         | 7.500    |            | 7.5000    |                                             |                         |    |    |   |   |   |   |
| SGO_2141 |                        | 1.000                |         |         |         |          |            |           | pth; peptidyl-tRNA hydrolase                |                         |    |    |   |   |   |   |
|          |                        |                      |         |         |         | 2.000    |            | 2.0000    |                                             |                         |    |    |   |   |   |   |
| SGO_2142 | 0.906                  | 8.309                | 0.0011  | 0.0018  | 73.500  | 48.500   | 109.5932   | 50.4744   | GTP-binding protein                         |                         |    |    |   |   |   |   |
|          |                        |                      |         |         | 68.000  | 60.000   | 97.0492    | 60.0000   |                                             |                         |    |    |   |   |   |   |

- Show detected proteins only  
 Show all proteins

Proteins found:  
1179

Filter by category:

ABC Transporter

Test

Cutoff

q-Value

.005

p-Value

|             | Signif | Direction | Applies To   |
|-------------|--------|-----------|--------------|
| Red         | yes    | +         | ratios, bars |
| Yellow      | no     | n/a       | bars         |
| Green       | yes    | -         | ratios, bars |
| Pink        | yes    | +         | p-, q-Values |
| Light Green | yes    | -         | p-, q-Values |

Dot Plots Dot Plots

Summary Table

SgFn vs Sg

SgPg vs Sg

SgPgFn vs Sg

SgPg vs SgFn

SgPgFn vs SgFn

SgPgFn vs SgPg

Coverage

SgPg vs Sg

Raw

Normalized

Log<sub>2</sub> Ratios

| Protein  | SgPg vs Sg             |                      |         |         | Raw     |         | Normalized |          | Description                              | Log <sub>2</sub> Ratios |    |    |   |   |   |   |
|----------|------------------------|----------------------|---------|---------|---------|---------|------------|----------|------------------------------------------|-------------------------|----|----|---|---|---|---|
|          | Log <sub>2</sub> Ratio | Log <sub>2</sub> Sum | q-Value | p-Value | SgPg    | Sg      | SgPg       | Sg       |                                          | -6                      | -4 | -2 | 0 | 2 | 4 | 6 |
| SGO_2145 | -0.255                 | 9.587                | 0.0085  | 0.0270  | 109.500 | 208.000 | 163.2715   | 216.4676 | comE; competence response regulator ComE |                         |    |    |   |   |   |   |
|          |                        |                      |         |         | 131.500 | 201.500 | 187.6759   | 201.5000 |                                          |                         |    |    |   |   |   |   |
| SGO_2146 | -1.707                 | 7.223                | 0.0003  | 0.0003  | 12.500  | 58.000  | 18.6383    | 60.3612  | comD; histidine protein kinase ComD      |                         |    |    |   |   |   |   |
|          |                        |                      |         |         | 11.500  | 54.000  | 16.4127    | 54.0000  |                                          |                         |    |    |   |   |   |   |
| SGO_2150 | -1.324                 | 8.249                | 0.0002  | 0.0001  | 29.500  | 108.500 | 43.9864    | 112.9170 | degP; serine protease                    |                         |    |    |   |   |   |   |
|          |                        |                      |         |         | 30.000  | 104.500 | 42.8158    | 104.5000 |                                          |                         |    |    |   |   |   |   |

- Show detected proteins only
- Show all proteins

Proteins found:  
1179

Filter by category:

ABC Transporter

Test

Cutoff

q-Value

.005

p-Value

|             | Signif | Direction | Applies To   |
|-------------|--------|-----------|--------------|
| Red         | yes    | +         | ratios, bars |
| Yellow      | no     | n/a       | bars         |
| Green       | yes    | -         | ratios, bars |
| Pink        | yes    | +         | p-, q-Values |
| Light Green | yes    | -         | p-, q-Values |

Dot Plots Dot Plots
