# Supplementary material for: Proteomics of Streptococcus gordonii within a model developing oral microbial community
Source: PubMed Central journal article supplement (PMC3534352; doi:10.1186/1471-2180-12-211), 2012-09-18
Supplement: 1471-2180-12-211-S4.pdf [file 1471-2180-12-211-S4.pdf]

Summary Table

SgFn vs Sg

SgPg vs Sg

SgPgFn vs Sg

SgPg vs SgFn

SgPgFn vs SgFn

SgPgFn vs SgPg

Coverage

SgPgFn vs Sg

Raw

Normalized

Log<sub>2</sub> Ratios

| Protein  | SgPgFn vs Sg           |                      |         |         | Raw     |         | Normalized |          | Description                                                        | Log <sub>2</sub> Ratios |    |    |   |   |   |   |
|----------|------------------------|----------------------|---------|---------|---------|---------|------------|----------|--------------------------------------------------------------------|-------------------------|----|----|---|---|---|---|
|          | Log <sub>2</sub> Ratio | Log <sub>2</sub> Sum | q-Value | p-Value | SgPgFn  | Sg      | SgPgFn     | Sg       |                                                                    | -6                      | -4 | -2 | 0 | 2 | 4 | 6 |
| SGO_0001 | -1.455                 | 6.882                | 0.0038  | 0.0189  | 5.000   | 32.000  | 13.1600    | 33.3027  | dnaA; chromosomal replication initiator protein DnaA               |                         |    |    |   |   |   |   |
|          |                        |                      |         |         | 6.000   | 53.500  | 18.0048    | 53.5000  |                                                                    |                         |    |    |   |   |   |   |
| SGO_0002 | -0.140                 | 6.846                | 0.0591  | 0.5301  | 9.000   | 21.000  | 23.6880    | 21.8549  | dnaN; DNA polymerase III, beta subunit                             |                         |    |    |   |   |   |   |
|          |                        |                      |         |         | 10.000  | 39.500  | 30.0081    | 39.5000  |                                                                    |                         |    |    |   |   |   |   |
| SGO_0004 | -2.017                 | 8.695                | 0.0009  | 0.0028  | 15.000  | 137.000 | 39.4800    | 142.5772 | putative lipoprotein                                               |                         |    |    |   |   |   |   |
|          |                        |                      |         |         | 14.000  | 190.500 | 42.0113    | 190.5000 |                                                                    |                         |    |    |   |   |   |   |
| SGO_0006 | 0.100                  | 7.626                | 0.0516  | 0.4541  | 22.500  | 44.000  | 59.2200    | 45.7912  | ABC transporter, ATP-binding protein                               |                         |    |    |   |   |   |   |
|          |                        |                      |         |         | 14.500  | 49.000  | 43.5117    | 49.0000  |                                                                    |                         |    |    |   |   |   |   |
| SGO_0007 | 0.785                  | 6.734                | 0.0005  | 0.0012  | 13.000  | 17.000  | 34.2160    | 17.6921  | trpS; tryptophanyl-tRNA synthetase                                 |                         |    |    |   |   |   |   |
|          |                        |                      |         |         | 11.000  | 21.500  | 33.0089    | 21.5000  |                                                                    |                         |    |    |   |   |   |   |
| SGO_0008 | 0.961                  | 9.763                | 0.0004  | 0.0008  | 105.500 | 156.500 | 277.6762   | 162.8711 | inosine-5'-monophosphate dehydrogenase                             |                         |    |    |   |   |   |   |
|          |                        |                      |         |         | 98.500  | 133.000 | 295.5796   | 133.0000 |                                                                    |                         |    |    |   |   |   |   |
| SGO_0011 | -0.825                 | 5.581                | 0.0082  | 0.0486  | 4.500   | 13.000  | 11.8440    | 13.5292  | proteinase, M16 family                                             |                         |    |    |   |   |   |   |
|          |                        |                      |         |         | 2.000   | 16.500  | 6.0016     | 16.5000  |                                                                    |                         |    |    |   |   |   |   |
| SGO_0015 | -2.738                 | 6.428                | 0.0039  | 0.0197  |         | 39.500  |            | 41.1080  | ABC transporter (ATP-binding protein)                              |                         |    |    |   |   |   |   |
|          |                        |                      |         |         | 2.000   | 39.000  | 6.0016     | 39.0000  |                                                                    |                         |    |    |   |   |   |   |
| SGO_0022 | 0.104                  | 5.176                | 0.0906  | 0.8591  | 3.000   | 6.000   | 7.8960     | 6.2443   | trmU; tRNA (5-methylaminomethyl-2-thiouridylate)-methyltransferase |                         |    |    |   |   |   |   |
|          |                        |                      |         |         | 3.500   | 11.500  | 10.5028    | 11.5000  |                                                                    |                         |    |    |   |   |   |   |
| SGO_0025 | 0.343                  | 6.230                | 0.0332  | 0.2749  | 5.500   | 14.500  | 14.4760    | 15.0903  | gidA; glucose inhibited division protein A                         |                         |    |    |   |   |   |   |
|          |                        |                      |         |         | 9.500   | 17.000  | 28.5077    | 17.0000  |                                                                    |                         |    |    |   |   |   |   |
| SGO_0026 | -4.015                 | 7.463                | 0.0109  | 0.0718  | 2.000   | 91.000  | 5.2640     | 94.7046  | DHH subfamily 1 protein                                            |                         |    |    |   |   |   |   |
|          |                        |                      |         |         |         | 76.500  |            | 76.5000  |                                                                    |                         |    |    |   |   |   |   |
| SGO_0027 | 0.520                  | 7.410                | 0.0109  | 0.0722  | 15.500  | 30.500  | 40.7960    | 31.7416  | rplI; ribosomal protein L9                                         |                         |    |    |   |   |   |   |
|          |                        |                      |         |         | 20.000  | 37.500  | 60.0162    | 37.5000  |                                                                    |                         |    |    |   |   |   |   |

- Show detected proteins only  
 Show all proteins

Proteins found:  
624

Filter by category:

ABC Transporter

Test

Cutoff

q-Value

.005

p-Value

|             | Signif | Direction | Applies To   |
|-------------|--------|-----------|--------------|
| Red         | yes    | +         | ratios, bars |
| Yellow      | no     | n/a       | bars         |
| Green       | yes    | -         | ratios, bars |
| Pink        | yes    | +         | p-, q-Values |
| Light Green | yes    | -         | p-, q-Values |

Dot Plots Dot Plots

Summary Table

SgFn vs Sg

SgPg vs Sg

SgPgFn vs Sg

SgPg vs SgFn

SgPgFn vs SgFn

SgPgFn vs SgPg

Coverage

SgPgFn vs Sg

Raw

Normalized

Log<sub>2</sub> Ratios

| Protein  | SgPgFn vs Sg           |                      |         |         | Raw      |          |           |           | Normalized                                           |    |        |    | Description | Log <sub>2</sub> Ratios |    |    |    |    |   |   |   |
|----------|------------------------|----------------------|---------|---------|----------|----------|-----------|-----------|------------------------------------------------------|----|--------|----|-------------|-------------------------|----|----|----|----|---|---|---|
|          | Log <sub>2</sub> Ratio | Log <sub>2</sub> Sum | q-Value | p-Value | SgPgFn   | Sg       | SgPgFn    | Sg        | SgPgFn                                               | Sg | SgPgFn | Sg |             | SgPgFn                  | Sg | -6 | -4 | -2 | 0 | 2 | 4 |
| SGO_0028 | -0.610                 | 5.208                | 0.0357  | 0.2993  |          | 11.000   |           | 11.4478   | dnaC; replicative DNA helicase                       |    |        |    |             |                         |    |    |    |    |   |   |   |
|          |                        |                      |         |         | 3.000    | 16.500   | 9.0024    | 16.5000   |                                                      |    |        |    |             |                         |    |    |    |    |   |   |   |
| SGO_0030 | 0.689                  | 6.851                | 0.0018  | 0.0069  | 14.500   | 19.000   | 38.1640   | 19.7735   | aspB; aspartate transaminase                         |    |        |    |             |                         |    |    |    |    |   |   |   |
|          |                        |                      |         |         | 11.000   | 24.500   | 33.0089   | 24.5000   |                                                      |    |        |    |             |                         |    |    |    |    |   |   |   |
| SGO_0032 | -0.245                 | 7.365                | 0.0180  | 0.1364  | 15.500   | 38.000   | 40.7960   | 39.5470   | plsX; fatty acid/phospholipid synthesis protein PlsX |    |        |    |             |                         |    |    |    |    |   |   |   |
|          |                        |                      |         |         | 11.500   | 50.000   | 34.5093   | 50.0000   |                                                      |    |        |    |             |                         |    |    |    |    |   |   |   |
| SGO_0033 | 1.403                  | 5.651                | 0.0085  | 0.0517  | 9.500    | 5.500    | 25.0040   | 5.7239    | acpP; acyl carrier protein                           |    |        |    |             |                         |    |    |    |    |   |   |   |
|          |                        |                      |         |         | 4.000    | 7.500    | 12.0032   | 7.5000    |                                                      |    |        |    |             |                         |    |    |    |    |   |   |   |
| SGO_0042 | 0.243                  | 5.283                | 0.0113  | 0.0752  | 5.500    | 11.500   | 14.4760   | 11.9682   | transcription regulator, GntR family                 |    |        |    |             |                         |    |    |    |    |   |   |   |
|          |                        |                      |         |         |          | 12.500   |           | 12.5000   |                                                      |    |        |    |             |                         |    |    |    |    |   |   |   |
| SGO_0054 | -0.677                 | 7.186                | 0.0010  | 0.0031  | 11.000   | 40.000   | 28.9520   | 41.6284   | dltA; D-alanine-activating enzyme                    |    |        |    |             |                         |    |    |    |    |   |   |   |
|          |                        |                      |         |         | 9.000    | 48.000   | 27.0073   | 48.0000   |                                                      |    |        |    |             |                         |    |    |    |    |   |   |   |
| SGO_0057 | -2.415                 | 8.108                | 0.0005  | 0.0010  | 8.500    | 99.500   | 22.3720   | 103.5506  | dltD protein                                         |    |        |    |             |                         |    |    |    |    |   |   |   |
|          |                        |                      |         |         | 7.000    | 129.000  | 21.0057   | 129.0000  |                                                      |    |        |    |             |                         |    |    |    |    |   |   |   |
| SGO_0059 | 1.992                  | 13.189               | 0.0006  | 0.0015  | 1304.000 | 1257.500 | 3432.1300 | 1308.6923 | pXO1; hypothetical protein SGO_0059                  |    |        |    |             |                         |    |    |    |    |   |   |   |
|          |                        |                      |         |         | 1313.500 | 653.500  | 3941.5609 | 653.5000  |                                                      |    |        |    |             |                         |    |    |    |    |   |   |   |
| SGO_0063 | -1.618                 | 7.907                | 0.0000  | 0.0000  | 11.000   | 86.000   | 28.9520   | 89.5010   | hypothetical protein SGO_0063                        |    |        |    |             |                         |    |    |    |    |   |   |   |
|          |                        |                      |         |         | 10.000   | 91.500   | 30.0081   | 91.5000   |                                                      |    |        |    |             |                         |    |    |    |    |   |   |   |
| SGO_0064 | -2.484                 | 8.988                | 0.0001  | 0.0000  | 15.000   | 214.000  | 39.4800   | 222.7119  | FtsK/SpoIIIE family protein                          |    |        |    |             |                         |    |    |    |    |   |   |   |
|          |                        |                      |         |         | 12.500   | 208.000  | 37.5101   | 208.0000  |                                                      |    |        |    |             |                         |    |    |    |    |   |   |   |
| SGO_0065 | 0.159                  | 7.386                | 0.0007  | 0.0020  | 17.000   | 37.500   | 44.7440   | 39.0266   | hypothetical protein SGO_0065                        |    |        |    |             |                         |    |    |    |    |   |   |   |
|          |                        |                      |         |         | 14.500   | 40.000   | 43.5117   | 40.0000   |                                                      |    |        |    |             |                         |    |    |    |    |   |   |   |
| SGO_0067 | -0.170                 | 6.487                | 0.0082  | 0.0489  | 7.500    | 23.000   | 19.7400   | 23.9363   | protein with prophage function domain                |    |        |    |             |                         |    |    |    |    |   |   |   |
|          |                        |                      |         |         | 7.500    | 23.500   | 22.5061   | 23.5000   |                                                      |    |        |    |             |                         |    |    |    |    |   |   |   |

- Show detected proteins only  
 Show all proteins

Proteins found:  
624

Filter by category:

ABC Transporter

Test

Cutoff

q-Value

.005

p-Value

|  | Signif | Direction | Applies To   |
|--|--------|-----------|--------------|
|  | yes    | +         | ratios, bars |
|  | no     | n/a       | bars         |
|  | yes    | -         | ratios, bars |
|  | yes    | +         | p-, q-Values |
|  | yes    | -         | p-, q-Values |

Dot Plots

Summary Table

SgFn vs Sg

SgPg vs Sg

SgPgFn vs Sg

SgPg vs SgFn

SgPgFn vs SgFn

SgPgFn vs SgPg

Coverage

| Protein  | SgPgFn vs Sg           |                      |         |         | Raw     |          | Normalized |           | Description                                    | Log <sub>2</sub> Ratios |    |    |   |   |   |   |
|----------|------------------------|----------------------|---------|---------|---------|----------|------------|-----------|------------------------------------------------|-------------------------|----|----|---|---|---|---|
|          | Log <sub>2</sub> Ratio | Log <sub>2</sub> Sum | q-Value | p-Value | SgPgFn  | Sg       | SgPgFn     | Sg        |                                                | -6                      | -4 | -2 | 0 | 2 | 4 | 6 |
| SGO_0068 | -0.815                 | 6.537                | 0.0004  | 0.0009  | 6.500   | 30.000   | 17.1080    | 31.2213   | lipoprotein, putative                          |                         |    |    |   |   |   |   |
|          |                        |                      |         |         | 5.500   | 28.000   | 16.5044    | 28.0000   |                                                |                         |    |    |   |   |   |   |
| SGO_0069 | -1.033                 | 5.980                | 0.0006  | 0.0015  | 4.500   | 19.500   | 11.8440    | 20.2938   | hypothetical protein SGO_0069                  |                         |    |    |   |   |   |   |
|          |                        |                      |         |         | 3.000   | 22.000   | 9.0024     | 22.0000   |                                                |                         |    |    |   |   |   |   |
| SGO_0070 | 0.351                  | 6.637                | 0.0080  | 0.0470  | 11.500  | 19.000   | 30.2680    | 19.7735   | merozoite surface protein 1                    |                         |    |    |   |   |   |   |
|          |                        |                      |         |         | 8.500   | 24.000   | 25.5069    | 24.0000   |                                                |                         |    |    |   |   |   |   |
| SGO_0080 | -0.691                 | 7.490                | 0.0004  | 0.0007  | 13.000  | 51.000   | 34.2160    | 53.0762   | hypothetical protein SGO_0080                  |                         |    |    |   |   |   |   |
|          |                        |                      |         |         | 11.500  | 58.000   | 34.5093    | 58.0000   |                                                |                         |    |    |   |   |   |   |
| SGO_0104 | -0.524                 | 9.703                | 0.0008  | 0.0024  | 60.000  | 234.000  | 157.9201   | 243.5261  | Maltose/maltodextrin-binding protein precursor |                         |    |    |   |   |   |   |
|          |                        |                      |         |         | 61.500  | 247.500  | 184.5497   | 247.5000  |                                                |                         |    |    |   |   |   |   |
| SGO_0105 | -0.043                 | 5.689                | 0.0920  | 0.8746  | 4.000   | 14.000   | 10.5280    | 14.5699   | malQ; 4-alpha-glucanotransferase               |                         |    |    |   |   |   |   |
|          |                        |                      |         |         | 5.000   | 11.500   | 15.0040    | 11.5000   |                                                |                         |    |    |   |   |   |   |
| SGO_0106 | 1.923                  | 7.794                | 0.0001  | 0.0001  | 33.500  | 19.000   | 88.1721    | 19.7735   | glgP-2; maltodextrin phosphorylase             |                         |    |    |   |   |   |   |
|          |                        |                      |         |         | 29.000  | 27.000   | 87.0234    | 27.0000   |                                                |                         |    |    |   |   |   |   |
| SGO_0113 | -1.648                 | 13.107               | 0.0001  | 0.0001  | 416.500 | 3329.000 | 1096.2286  | 3464.5223 | acdH; alcohol-acetaldehyde dehydrogenase       |                         |    |    |   |   |   |   |
|          |                        |                      |         |         | 345.500 | 3222.500 | 1036.7791  | 3222.5000 |                                                |                         |    |    |   |   |   |   |
| SGO_0135 | -1.286                 | 7.825                | 0.0004  | 0.0008  | 10.500  | 77.500   | 27.6360    | 80.6550   | v-type sodium ATP synthase, subunit A          |                         |    |    |   |   |   |   |
|          |                        |                      |         |         | 13.000  | 79.500   | 39.0105    | 79.5000   |                                                |                         |    |    |   |   |   |   |
| SGO_0136 | -1.600                 | 8.309                | 0.0005  | 0.0011  | 12.500  | 106.000  | 32.9000    | 110.3152  | v-type sodium ATP synthase, chain B            |                         |    |    |   |   |   |   |
|          |                        |                      |         |         | 15.500  | 127.500  | 46.5125    | 127.5000  |                                                |                         |    |    |   |   |   |   |
| SGO_0139 | -0.511                 | 6.896                | 0.0090  | 0.0555  | 11.500  | 32.000   | 30.2680    | 33.3027   | thrC; threonine synthase                       |                         |    |    |   |   |   |   |
|          |                        |                      |         |         | 6.500   | 36.000   | 19.5052    | 36.0000   |                                                |                         |    |    |   |   |   |   |
| SGO_0145 | -0.848                 | 7.593                | 0.0004  | 0.0009  | 12.000  | 61.500   | 31.5840    | 64.0036   | polI; DNA polymerase I                         |                         |    |    |   |   |   |   |
|          |                        |                      |         |         | 12.500  | 60.000   | 37.5101    | 60.0000   |                                                |                         |    |    |   |   |   |   |

- Show detected proteins only
- Show all proteins

Proteins found: 624

Filter by category:

ABC Transporter

Test

Cutoff

q-Value

.005

p-Value

|             | Signif | Direction | Applies To   |
|-------------|--------|-----------|--------------|
| Red         | yes    | +         | ratios, bars |
| Yellow      | no     | n/a       | bars         |
| Green       | yes    | -         | ratios, bars |
| Pink        | yes    | +         | p-, q-Values |
| Light Green | yes    | -         | p-, q-Values |

Dot Plots Dot Plots

Summary Table SgFn vs Sg SgPg vs Sg SgPgFn vs Sg SgPg vs SgFn SgPgFn vs SgFn SgPgFn vs SgPg Coverage

| Protein  | SgPgFn vs Sg           |                      |         |         | Raw     |         | Normalized |          | Description                                                                                         | Log <sub>2</sub> Ratios |    |    |   |   |   |   |
|----------|------------------------|----------------------|---------|---------|---------|---------|------------|----------|-----------------------------------------------------------------------------------------------------|-------------------------|----|----|---|---|---|---|
|          | Log <sub>2</sub> Ratio | Log <sub>2</sub> Sum | q-Value | p-Value | SgPgFn  | Sg      | SgPgFn     | Sg       |                                                                                                     | -6                      | -4 | -2 | 0 | 2 | 4 | 6 |
| SGO_0146 | 0.244                  | 5.991                | 0.0505  | 0.4436  | 10.500  | 11.000  | 27.6360    | 11.4478  | CoA-binding domain protein                                                                          |                         |    |    |   |   |   |   |
|          |                        |                      |         |         | 3.000   | 15.500  | 9.0024     | 15.5000  |                                                                                                     |                         |    |    |   |   |   |   |
| SGO_0152 | -0.431                 | 5.291                | 0.0027  | 0.0119  | 3.500   | 10.500  | 9.2120     | 10.9275  | tgt; queuine tRNA-ribosyltransferase                                                                |                         |    |    |   |   |   |   |
|          |                        |                      |         |         | 2.500   | 11.500  | 7.5020     | 11.5000  |                                                                                                     |                         |    |    |   |   |   |   |
| SGO_0154 | 0.826                  | 10.628               | 0.0007  | 0.0018  | 193.000 | 309.500 | 507.9763   | 322.0996 | pgi; glucose-6-phosphate isomerase                                                                  |                         |    |    |   |   |   |   |
|          |                        |                      |         |         | 167.000 | 251.500 | 501.1349   | 251.5000 |                                                                                                     |                         |    |    |   |   |   |   |
| SGO_0156 | -2.949                 | 7.620                | 0.0003  | 0.0003  | 4.000   | 90.500  | 10.5280    | 94.1842  | hypothetical protein SGO_0156                                                                       |                         |    |    |   |   |   |   |
|          |                        |                      |         |         | 4.000   | 80.000  | 12.0032    | 80.0000  |                                                                                                     |                         |    |    |   |   |   |   |
| SGO_0158 | 1.833                  | 7.756                | 0.0014  | 0.0050  | 37.500  | 24.500  | 98.7001    | 25.4974  | 2,3,4,5-tetrahydropyridine-2-carboxylate N-succinyltransferase, putative                            |                         |    |    |   |   |   |   |
|          |                        |                      |         |         | 23.500  | 21.500  | 70.5190    | 21.5000  |                                                                                                     |                         |    |    |   |   |   |   |
| SGO_0163 | 0.009                  | 7.216                | 0.1026  | 0.9909  | 14.000  | 32.000  | 36.8480    | 33.3027  | galU; UTP-glucose-1-phosphate uridylyltransferase                                                   |                         |    |    |   |   |   |   |
|          |                        |                      |         |         | 12.500  | 41.000  | 37.5101    | 41.0000  |                                                                                                     |                         |    |    |   |   |   |   |
| SGO_0164 | -0.524                 | 7.239                | 0.0018  | 0.0071  | 11.000  | 40.000  | 28.9520    | 41.6284  | Glycerol-3-phosphate dehydrogenase [NAD(P)+] (NAD(P)H-dependent glycerol-3-phosphate dehydrogenase) |                         |    |    |   |   |   |   |
|          |                        |                      |         |         | 11.000  | 47.500  | 33.0089    | 47.5000  |                                                                                                     |                         |    |    |   |   |   |   |
| SGO_0169 | 0.646                  | 5.680                | 0.0064  | 0.0364  | 5.500   | 7.500   | 14.4760    | 7.8053   | dut; dUTP diphosphatase                                                                             |                         |    |    |   |   |   |   |
|          |                        |                      |         |         | 5.500   | 12.500  | 16.5044    | 12.5000  |                                                                                                     |                         |    |    |   |   |   |   |
| SGO_0171 | -1.565                 | 5.530                | 0.0219  | 0.1728  | 2.500   | 15.500  | 6.5800     | 16.1310  | radA; DNA repair protein RadA                                                                       |                         |    |    |   |   |   |   |
|          |                        |                      |         |         |         | 23.500  |            | 23.5000  |                                                                                                     |                         |    |    |   |   |   |   |
| SGO_0174 | 0.684                  | 8.400                | 0.0008  | 0.0023  | 37.000  | 60.500  | 97.3841    | 62.9629  | gltX; glutamyl-tRNA synthetase                                                                      |                         |    |    |   |   |   |   |
|          |                        |                      |         |         | 37.000  | 66.500  | 111.0299   | 66.5000  |                                                                                                     |                         |    |    |   |   |   |   |
| SGO_0180 | -1.123                 | 6.647                | 0.0120  | 0.0809  | 3.500   | 24.000  | 9.2120     | 24.9770  | jag; hypothetical protein SGO_0180                                                                  |                         |    |    |   |   |   |   |
|          |                        |                      |         |         | 8.000   | 42.000  | 24.0065    | 42.0000  |                                                                                                     |                         |    |    |   |   |   |   |
| SGO_0190 | -1.173                 | 5.410                | 0.0326  | 0.2689  |         | 12.500  |            | 13.0089  | hypothetical protein SGO_0190                                                                       |                         |    |    |   |   |   |   |
|          |                        |                      |         |         | 2.500   | 22.000  | 7.5020     | 22.0000  |                                                                                                     |                         |    |    |   |   |   |   |

Show detected proteins only  
 Show all proteins  
 Filter by category:

Proteins found: 624

**Test**      **Cutoff**  
     

|             | Signif | Direction | Applies To   |
|-------------|--------|-----------|--------------|
| Red         | yes    | +         | ratios, bars |
| Yellow      | no     | n/a       | bars         |
| Green       | yes    | -         | ratios, bars |
| Pink        | yes    | +         | p-, q-Values |
| Light Green | yes    | -         | p-, q-Values |

Dot Plots  Dot Plots

Summary Table

SgFn vs Sg

SgPg vs Sg

SgPgFn vs Sg

SgPg vs SgFn

SgPgFn vs SgFn

SgPgFn vs SgPg

Coverage

SgPgFn vs Sg

Raw

Normalized

Log<sub>2</sub> Ratios

| Protein  | SgPgFn vs Sg           |                      |         |         | Raw      |          |           |           | Normalized                                            |    |        |    | Description | Log <sub>2</sub> Ratios |    |    |    |    |   |   |
|----------|------------------------|----------------------|---------|---------|----------|----------|-----------|-----------|-------------------------------------------------------|----|--------|----|-------------|-------------------------|----|----|----|----|---|---|
|          | Log <sub>2</sub> Ratio | Log <sub>2</sub> Sum | q-Value | p-Value | SgPgFn   | Sg       | SgPgFn    | Sg        | SgPgFn                                                | Sg | SgPgFn | Sg |             | SgPgFn                  | Sg | -6 | -4 | -2 | 0 | 2 |
| SGO_0198 | 0.364                  | 6.853                | 0.0122  | 0.0827  | 11.000   | 27.500   | 28.9520   | 28.6195   | rpe; ribulose-phosphate 3-epimerase                   |    |        |    |             |                         |    |    |    |    |   |   |
|          |                        |                      |         |         | 12.000   | 22.000   | 36.0097   | 22.0000   |                                                       |    |        |    |             |                         |    |    |    |    |   |   |
| SGO_0200 | -1.758                 | 7.706                | 0.0003  | 0.0003  | 7.500    | 74.500   | 19.7400   | 77.5329   | competence-induced protein Ccs50                      |    |        |    |             |                         |    |    |    |    |   |   |
|          |                        |                      |         |         | 9.500    | 83.000   | 28.5077   | 83.0000   |                                                       |    |        |    |             |                         |    |    |    |    |   |   |
| SGO_0201 | -1.090                 | 7.048                | 0.0011  | 0.0034  | 7.000    | 47.000   | 18.4240   | 48.9134   | cmp-binding-factor 1                                  |    |        |    |             |                         |    |    |    |    |   |   |
|          |                        |                      |         |         | 8.000    | 41.000   | 24.0065   | 41.0000   |                                                       |    |        |    |             |                         |    |    |    |    |   |   |
| SGO_0204 | -0.064                 | 8.092                | 0.0304  | 0.2491  | 25.000   | 63.500   | 65.8000   | 66.0851   | rpsL; ribosomal protein S12                           |    |        |    |             |                         |    |    |    |    |   |   |
|          |                        |                      |         |         | 22.500   | 73.500   | 67.5182   | 73.5000   |                                                       |    |        |    |             |                         |    |    |    |    |   |   |
| SGO_0205 | 0.797                  | 9.499                | 0.0036  | 0.0174  | 75.000   | 113.000  | 197.4001  | 117.6002  | rpsG; ribosomal protein S7                            |    |        |    |             |                         |    |    |    |    |   |   |
|          |                        |                      |         |         | 87.500   | 146.000  | 262.5707  | 146.0000  |                                                       |    |        |    |             |                         |    |    |    |    |   |   |
| SGO_0206 | 1.012                  | 12.576               | 0.0006  | 0.0015  | 837.000  | 972.500  | 2202.9853 | 1012.0901 | fusA; translation elongation factor G                 |    |        |    |             |                         |    |    |    |    |   |   |
|          |                        |                      |         |         | 627.500  | 1007.500 | 1883.0068 | 1007.5000 |                                                       |    |        |    |             |                         |    |    |    |    |   |   |
| SGO_0207 | 1.446                  | 12.724               | 0.0010  | 0.0034  | 830.000  | 748.500  | 2184.5613 | 778.9711  | gap; glyceraldehyde-3-phosphate dehydrogenase, type I |    |        |    |             |                         |    |    |    |    |   |   |
|          |                        |                      |         |         | 919.500  | 1043.000 | 2759.2427 | 1043.0000 |                                                       |    |        |    |             |                         |    |    |    |    |   |   |
| SGO_0209 | 1.708                  | 12.819               | 0.0001  | 0.0000  | 1021.000 | 845.500  | 2687.2735 | 879.9200  | pgk; phosphoglycerate kinase                          |    |        |    |             |                         |    |    |    |    |   |   |
|          |                        |                      |         |         | 948.000  | 814.500  | 2844.7657 | 814.5000  |                                                       |    |        |    |             |                         |    |    |    |    |   |   |
| SGO_0215 | -0.427                 | 8.481                | 0.0090  | 0.0555  | 34.500   | 95.500   | 90.8041   | 99.3878   | glnA; glutamine synthetase, type I                    |    |        |    |             |                         |    |    |    |    |   |   |
|          |                        |                      |         |         | 21.000   | 104.000  | 63.0170   | 104.0000  |                                                       |    |        |    |             |                         |    |    |    |    |   |   |
| SGO_0219 | -0.152                 | 8.101                | 0.0183  | 0.1387  | 26.000   | 74.500   | 68.4320   | 77.5329   | metallo-beta-lactamase superfamily protein 1          |    |        |    |             |                         |    |    |    |    |   |   |
|          |                        |                      |         |         | 20.500   | 67.000   | 61.5166   | 67.0000   |                                                       |    |        |    |             |                         |    |    |    |    |   |   |
| SGO_0230 | 0.773                  | 5.967                | 0.0163  | 0.1203  | 5.000    | 9.000    | 13.1600   | 9.3664    | Protein of unknown function, DUF536 family            |    |        |    |             |                         |    |    |    |    |   |   |
|          |                        |                      |         |         | 9.000    | 13.000   | 27.0073   | 13.0000   |                                                       |    |        |    |             |                         |    |    |    |    |   |   |
| SGO_0232 | 1.561                  | 4.606                | 0.0173  | 0.1289  | 4.500    |          | 11.8440   |           | conserved hypothetical protein TIGR00103              |    |        |    |             |                         |    |    |    |    |   |   |
|          |                        |                      |         |         | 3.000    | 3.500    | 9.0024    | 3.5000    |                                                       |    |        |    |             |                         |    |    |    |    |   |   |

- Show detected proteins only  
 Show all proteins

Proteins found:  
624

Filter by category:

ABC Transporter

Test

Cutoff

q-Value

.005

p-Value

|             | Signif | Direction | Applies To   |
|-------------|--------|-----------|--------------|
| Red         | yes    | +         | ratios, bars |
| Yellow      | no     | n/a       | bars         |
| Green       | yes    | -         | ratios, bars |
| Pink        | yes    | +         | p-, q-Values |
| Light Green | yes    | -         | p-, q-Values |

Dot Plots Dot Plots



Summary Table

SgFn vs Sg

SgPg vs Sg

SgPgFn vs Sg

SgPg vs SgFn

SgPgFn vs SgFn

SgPgFn vs SgPg

Coverage

SgPgFn vs Sg

Raw

Normalized

Log<sub>2</sub> Ratios

| Protein  | SgPgFn vs Sg           |                      |         |         | Raw     |         | Normalized |          | Description                                                        | Log <sub>2</sub> Ratios |    |    |   |   |   |   |
|----------|------------------------|----------------------|---------|---------|---------|---------|------------|----------|--------------------------------------------------------------------|-------------------------|----|----|---|---|---|---|
|          | Log <sub>2</sub> Ratio | Log <sub>2</sub> Sum | q-Value | p-Value | SgPgFn  | Sg      | SgPgFn     | Sg       |                                                                    | -6                      | -4 | -2 | 0 | 2 | 4 | 6 |
| SGO_0286 | -1.900                 | 5.668                | 0.0073  | 0.0419  |         | 20.500  |            | 21.3345  | DNA mismatch repair protein MutS, putative                         |                         |    |    |   |   |   |   |
|          |                        |                      |         |         | 2.000   | 23.500  | 6.0016     | 23.5000  |                                                                    |                         |    |    |   |   |   |   |
| SGO_0290 | -1.342                 | 5.657                | 0.0373  | 0.3152  | 3.000   | 13.500  | 7.8960     | 14.0496  | copper -translocating P-type ATPase                                |                         |    |    |   |   |   |   |
|          |                        |                      |         |         |         | 28.500  |            | 28.5000  |                                                                    |                         |    |    |   |   |   |   |
| SGO_0291 | -2.286                 | 7.507                | 0.0004  | 0.0006  | 5.000   | 78.500  | 13.1600    | 81.6957  | copper-translocating P-type ATPase                                 |                         |    |    |   |   |   |   |
|          |                        |                      |         |         | 6.000   | 69.000  | 18.0048    | 69.0000  |                                                                    |                         |    |    |   |   |   |   |
| SGO_0292 | 1.040                  | 9.282                | 0.0003  | 0.0005  | 84.000  | 100.000 | 221.0881   | 104.0710 | spxB; pyruvate oxidase                                             |                         |    |    |   |   |   |   |
|          |                        |                      |         |         | 66.000  | 99.500  | 198.0533   | 99.5000  |                                                                    |                         |    |    |   |   |   |   |
| SGO_0312 | 0.992                  | 11.225               | 0.0001  | 0.0000  | 309.000 | 387.000 | 813.2885   | 402.7546 | xfp; D-xylulose 5-phosphate/D-fructose 6-phosphate phosphoketolase |                         |    |    |   |   |   |   |
|          |                        |                      |         |         | 260.000 | 398.000 | 780.2100   | 398.0000 |                                                                    |                         |    |    |   |   |   |   |
| SGO_0317 | -5.050                 | 8.661                | 0.0082  | 0.0481  |         | 177.500 |            | 184.7260 | LPXTG cell wall surface protein, serine protease, subtilase family |                         |    |    |   |   |   |   |
|          |                        |                      |         |         | 2.000   | 214.000 | 6.0016     | 214.0000 |                                                                    |                         |    |    |   |   |   |   |
| SGO_0321 | 0.594                  | 6.384                | 0.0162  | 0.1194  | 8.000   | 11.500  | 21.0560    | 11.9682  | polypeptide deformylase                                            |                         |    |    |   |   |   |   |
|          |                        |                      |         |         | 9.500   | 22.000  | 28.5077    | 22.0000  |                                                                    |                         |    |    |   |   |   |   |
| SGO_0333 | 0.039                  | 8.488                | 0.0801  | 0.7503  | 30.000  | 77.500  | 78.9600    | 80.6550  | rpsO; ribosomal protein S15                                        |                         |    |    |   |   |   |   |
|          |                        |                      |         |         | 34.500  | 96.000  | 103.5279   | 96.0000  |                                                                    |                         |    |    |   |   |   |   |
| SGO_0342 | 0.291                  | 7.819                | 0.0031  | 0.0143  | 25.000  | 47.500  | 65.8000    | 49.4337  | pepF-2; oligoendopeptidase                                         |                         |    |    |   |   |   |   |
|          |                        |                      |         |         | 19.500  | 52.000  | 58.5157    | 52.0000  |                                                                    |                         |    |    |   |   |   |   |
| SGO_0344 | -0.094                 | 9.053                | 0.0059  | 0.0326  | 48.000  | 128.500 | 126.3361   | 133.7312 | pnpA; polyribonucleotide nucleotidyltransferase                    |                         |    |    |   |   |   |   |
|          |                        |                      |         |         | 43.500  | 140.500 | 130.5351   | 140.5000 |                                                                    |                         |    |    |   |   |   |   |
| SGO_0349 | 0.188                  | 6.710                | 0.0171  | 0.1270  | 11.500  | 22.000  | 30.2680    | 22.8956  | cysS; cysteinyl-tRNA synthetase                                    |                         |    |    |   |   |   |   |
|          |                        |                      |         |         | 8.500   | 26.000  | 25.5069    | 26.0000  |                                                                    |                         |    |    |   |   |   |   |
| SGO_0352 | -0.788                 | 7.816                | 0.0003  | 0.0003  | 16.000  | 66.000  | 42.1120    | 68.6868  | ABC transporter, ATP-binding protein SP1580                        |                         |    |    |   |   |   |   |
|          |                        |                      |         |         | 13.500  | 74.000  | 40.5109    | 74.0000  |                                                                    |                         |    |    |   |   |   |   |

 Show detected proteins only Show all proteinsProteins found:  
624 Filter by category:

ABC Transporter

Test

Cutoff

q-Value

.005

p-Value

|             | Signif | Direction | Applies To   |
|-------------|--------|-----------|--------------|
| Red         | yes    | +         | ratios, bars |
| Yellow      | no     | n/a       | bars         |
| Green       | yes    | -         | ratios, bars |
| Pink        | yes    | +         | p-, q-Values |
| Light Green | yes    | -         | p-, q-Values |

Dot Plots Dot Plots

Summary Table SgFn vs Sg SgPg vs Sg SgPgFn vs Sg SgPg vs SgFn SgPgFn vs SgFn SgPgFn vs SgPg Coverage

| Protein  | SgPgFn vs Sg           |                      |         |         | Raw    |         | Normalized |          | Description                                   | Log <sub>2</sub> Ratios |    |    |   |   |
|----------|------------------------|----------------------|---------|---------|--------|---------|------------|----------|-----------------------------------------------|-------------------------|----|----|---|---|
|          | Log <sub>2</sub> Ratio | Log <sub>2</sub> Sum | q-Value | p-Value | SgPgFn | Sg      | SgPgFn     | Sg       |                                               | -6                      | -4 | -2 | 0 | 2 |
| SGO_0357 | 1.313                  | 7.388                | 0.0012  | 0.0041  | 21.000 | 17.500  | 55.2720    | 18.2124  | degV; DegV family fatty acid binding protein  |                         |    |    |   |   |
|          |                        |                      |         |         | 21.000 | 31.000  | 63.0170    | 31.0000  |                                               |                         |    |    |   |   |
| SGO_0358 | 0.343                  | 9.490                | 0.0083  | 0.0498  | 73.000 | 133.000 | 192.1361   | 138.4144 | rplM; ribosomal protein L13                   |                         |    |    |   |   |
|          |                        |                      |         |         | 69.500 | 180.000 | 208.5561   | 180.0000 |                                               |                         |    |    |   |   |
| SGO_0359 | 0.022                  | 8.546                | 0.0981  | 0.9422  | 32.500 | 76.000  | 85.5400    | 79.0939  | rpsI; ribosomal protein S9                    |                         |    |    |   |   |
|          |                        |                      |         |         | 34.000 | 107.000 | 102.0275   | 107.0000 |                                               |                         |    |    |   |   |
| SGO_0368 | 1.075                  | 3.371                | 0.0148  | 0.1064  | 2.000  | 2.000   | 5.2640     | 2.0814   | merA; mercury(II) reductase                   |                         |    |    |   |   |
|          |                        |                      |         |         |        | 3.000   |            | 3.0000   |                                               |                         |    |    |   |   |
| SGO_0372 | 0.792                  | 5.806                | 0.0059  | 0.0319  | 7.000  | 13.000  | 18.4240    | 13.5292  | malate oxidoreductase                         |                         |    |    |   |   |
|          |                        |                      |         |         | 5.500  | 7.500   | 16.5044    | 7.5000   |                                               |                         |    |    |   |   |
| SGO_0374 | -1.123                 | 6.002                | 0.0022  | 0.0094  | 5.000  | 22.500  | 13.1600    | 23.4160  | Response regulator of the LytR/AlgR family    |                         |    |    |   |   |
|          |                        |                      |         |         | 2.500  | 20.000  | 7.5020     | 20.0000  |                                               |                         |    |    |   |   |
| SGO_0376 | -0.926                 | 3.932                |         |         | 2.000  |         | 5.2640     |          | ABC transporter ATP-binding protein           |                         |    |    |   |   |
|          |                        |                      |         |         |        | 10.000  |            | 10.0000  |                                               |                         |    |    |   |   |
| SGO_0384 | -0.243                 | 5.827                | 0.0418  | 0.3577  | 4.500  | 10.500  | 11.8440    | 10.9275  | putative carboxylate-amine/thiol ligase       |                         |    |    |   |   |
|          |                        |                      |         |         | 4.500  | 20.500  | 13.5036    | 20.5000  |                                               |                         |    |    |   |   |
| SGO_0390 | 1.196                  | 7.757                | 0.0003  | 0.0005  | 27.000 | 30.000  | 71.0640    | 31.2213  | glycerol-3-phosphate dehydrogenase (NAD (P)+) |                         |    |    |   |   |
|          |                        |                      |         |         | 26.500 | 34.500  | 79.5214    | 34.5000  |                                               |                         |    |    |   |   |
| SGO_0392 | 2.271                  | 4.127                |         |         | 5.500  |         | 14.4760    |          | phosphoglycerate mutase                       |                         |    |    |   |   |
|          |                        |                      |         |         |        | 3.000   |            | 3.0000   |                                               |                         |    |    |   |   |
| SGO_0398 | -2.749                 | 6.912                | 0.0009  | 0.0028  | 2.500  | 58.500  | 6.5800     | 60.8815  | ABC transporter ATP-binding protein           |                         |    |    |   |   |
|          |                        |                      |         |         | 3.000  | 44.000  | 9.0024     | 44.0000  |                                               |                         |    |    |   |   |
| SGO_0401 | 0.875                  | 7.096                | 0.0122  | 0.0835  | 17.000 | 14.000  | 44.7440    | 14.5699  | grpE; co-chaperone GrpE                       |                         |    |    |   |   |
|          |                        |                      |         |         | 13.500 | 37.000  | 40.5109    | 37.0000  |                                               |                         |    |    |   |   |

Show detected proteins only  
 Show all proteins  
 Filter by category:

Proteins found: 624

**Test**      **Cutoff**  
     

|  | Signif | Direction | Applies To   |
|--|--------|-----------|--------------|
|  | yes    | +         | ratios, bars |
|  | no     | n/a       | bars         |
|  | yes    | -         | ratios, bars |
|  | yes    | +         | p-, q-Values |
|  | yes    | -         | p-, q-Values |

[Dot Plots](#)



Summary Table

SgFn vs Sg

SgPg vs Sg

SgPgFn vs Sg

SgPg vs SgFn

SgPgFn vs SgFn

SgPgFn vs SgPg

Coverage

SgPgFn vs Sg

Raw

Normalized

Log<sub>2</sub> Ratios

| Protein  | SgPgFn vs Sg           |                      |         |         | Raw     |         |          |          | Normalized                                  |    |        |    | Description | Log <sub>2</sub> Ratios |    |    |    |    |   |   |   |
|----------|------------------------|----------------------|---------|---------|---------|---------|----------|----------|---------------------------------------------|----|--------|----|-------------|-------------------------|----|----|----|----|---|---|---|
|          | Log <sub>2</sub> Ratio | Log <sub>2</sub> Sum | q-Value | p-Value | SgPgFn  | Sg      | SgPgFn   | Sg       | SgPgFn                                      | Sg | SgPgFn | Sg |             | SgPgFn                  | Sg | -6 | -4 | -2 | 0 | 2 | 4 |
| SGO_0402 | 0.487                  | 11.157               | 0.0007  | 0.0019  | 245.000 | 434.500 | 644.8404 | 452.1883 | dnaK; DnaK chaperone protein                |    |        |    |             |                         |    |    |    |    |   |   |   |
|          |                        |                      |         |         | 229.000 | 499.000 | 687.1850 | 499.0000 |                                             |    |        |    |             |                         |    |    |    |    |   |   |   |
| SGO_0404 | -2.460                 | 7.910                | 0.0032  | 0.0147  | 5.000   | 71.000  | 13.1600  | 73.8904  | dnaJ; DnaJ chaperone protein                |    |        |    |             |                         |    |    |    |    |   |   |   |
|          |                        |                      |         |         | 8.000   | 129.500 | 24.0065  | 129.5000 |                                             |    |        |    |             |                         |    |    |    |    |   |   |   |
| SGO_0408 | -4.983                 | 8.913                | 0.0027  | 0.0117  |         | 232.000 |          | 241.4446 | zmpB; zinc metalloproteinase B              |    |        |    |             |                         |    |    |    |    |   |   |   |
|          |                        |                      |         |         | 2.500   | 233.000 | 7.5020   | 233.0000 |                                             |    |        |    |             |                         |    |    |    |    |   |   |   |
| SGO_0412 | 1.089                  | 11.280               | 0.0002  | 0.0002  | 328.500 | 353.500 | 864.6125 | 367.8908 | tig; trigger factor                         |    |        |    |             |                         |    |    |    |    |   |   |   |
|          |                        |                      |         |         | 275.000 | 428.500 | 825.2221 | 428.5000 |                                             |    |        |    |             |                         |    |    |    |    |   |   |   |
| SGO_0413 | 1.445                  | 6.540                | 0.0007  | 0.0018  | 12.500  | 15.500  | 32.9000  | 16.1310  | DNA-directed RNA polymerase delta chain     |    |        |    |             |                         |    |    |    |    |   |   |   |
|          |                        |                      |         |         | 11.500  | 9.500   | 34.5093  | 9.5000   |                                             |    |        |    |             |                         |    |    |    |    |   |   |   |
| SGO_0415 | -1.184                 | 10.658               | 0.0003  | 0.0005  | 89.500  | 569.500 | 235.5641 | 592.6841 | secA; preprotein translocase, SecA subunit  |    |        |    |             |                         |    |    |    |    |   |   |   |
|          |                        |                      |         |         | 86.000  | 529.500 | 258.0695 | 529.5000 |                                             |    |        |    |             |                         |    |    |    |    |   |   |   |
| SGO_0416 | -0.211                 | 6.715                | 0.0597  | 0.5367  | 12.000  | 24.000  | 31.5840  | 24.9770  | phospho-2-dehydro-3-deoxyheptonate aldolase |    |        |    |             |                         |    |    |    |    |   |   |   |
|          |                        |                      |         |         | 6.000   | 30.500  | 18.0048  | 30.5000  |                                             |    |        |    |             |                         |    |    |    |    |   |   |   |
| SGO_0426 | -0.210                 | 5.146                | 0.0650  | 0.5907  | 4.000   | 9.500   | 10.5280  | 9.8867   | Cof family protein                          |    |        |    |             |                         |    |    |    |    |   |   |   |
|          |                        |                      |         |         |         | 15.000  |          | 15.0000  |                                             |    |        |    |             |                         |    |    |    |    |   |   |   |
| SGO_0427 | 1.454                  | 6.180                | 0.0001  | 0.0001  | 10.500  | 9.500   | 27.6360  | 9.8867   | universal stress protein family             |    |        |    |             |                         |    |    |    |    |   |   |   |
|          |                        |                      |         |         | 8.500   | 9.500   | 25.5069  | 9.5000   |                                             |    |        |    |             |                         |    |    |    |    |   |   |   |
| SGO_0429 | -0.434                 | 9.126                | 0.0012  | 0.0042  | 43.500  | 162.000 | 114.4921 | 168.5950 | aspartate transaminase                      |    |        |    |             |                         |    |    |    |    |   |   |   |
|          |                        |                      |         |         | 41.000  | 152.500 | 123.0331 | 152.5000 |                                             |    |        |    |             |                         |    |    |    |    |   |   |   |
| SGO_0432 | 0.234                  | 7.019                | 0.0184  | 0.1401  | 14.000  | 32.500  | 36.8480  | 33.8231  | entB; isochorismatase family protein        |    |        |    |             |                         |    |    |    |    |   |   |   |
|          |                        |                      |         |         | 11.000  | 26.000  | 33.0089  | 26.0000  |                                             |    |        |    |             |                         |    |    |    |    |   |   |   |
| SGO_0434 | -0.962                 | 7.443                | 0.0026  | 0.0113  | 13.500  | 49.000  | 35.5320  | 50.9948  | aspS-2; aspartyl-tRNA synthetase            |    |        |    |             |                         |    |    |    |    |   |   |   |
|          |                        |                      |         |         | 8.000   | 63.500  | 24.0065  | 63.5000  |                                             |    |        |    |             |                         |    |    |    |    |   |   |   |

 Show detected proteins only Show all proteinsProteins found:  
624 Filter by category:

ABC Transporter

Test

Cutoff

q-Value

.005

p-Value

|             | Signif | Direction | Applies To   |
|-------------|--------|-----------|--------------|
| Red         | yes    | +         | ratios, bars |
| Yellow      | no     | n/a       | bars         |
| Green       | yes    | -         | ratios, bars |
| Pink        | yes    | +         | p-, q-Values |
| Light Green | yes    | -         | p-, q-Values |

Dot Plots Dot Plots

Summary Table

SgFn vs Sg

SgPg vs Sg

SgPgFn vs Sg

SgPg vs SgFn

SgPgFn vs SgFn

SgPgFn vs SgPg

Coverage

SgPgFn vs Sg

Raw

Normalized

Log<sub>2</sub> Ratios

| Protein  | SgPgFn vs Sg           |                      |         |         | Raw    |         |          |          | Normalized                                           |    |        |    | Description | Log <sub>2</sub> Ratios |    |    |    |    |   |   |   |   |
|----------|------------------------|----------------------|---------|---------|--------|---------|----------|----------|------------------------------------------------------|----|--------|----|-------------|-------------------------|----|----|----|----|---|---|---|---|
|          | Log <sub>2</sub> Ratio | Log <sub>2</sub> Sum | q-Value | p-Value | SgPgFn | Sg      | SgPgFn   | Sg       | SgPgFn                                               | Sg | SgPgFn | Sg |             | SgPgFn                  | Sg | -6 | -4 | -2 | 0 | 2 | 4 | 6 |
| SGO_0435 | 0.062                  | 6.359                | 0.0647  | 0.5867  | 8.500  | 17.500  | 22.3720  | 18.2124  | gatC; glutamyl-tRNA(Gln) amidotransferase, C subunit |    |        |    |             |                         |    |    |    |    |   |   |   |   |
|          |                        |                      |         |         | 6.500  | 22.000  | 19.5052  | 22.0000  |                                                      |    |        |    |             |                         |    |    |    |    |   |   |   |   |
| SGO_0436 | -0.390                 | 9.261                | 0.0025  | 0.0108  | 50.000 | 179.500 | 131.6001 | 186.8074 | gatA; glutamyl-tRNA(Gln) amidotransferase, A subunit |    |        |    |             |                         |    |    |    |    |   |   |   |   |
|          |                        |                      |         |         | 44.500 | 161.500 | 133.5359 | 161.5000 |                                                      |    |        |    |             |                         |    |    |    |    |   |   |   |   |
| SGO_0437 | 0.341                  | 8.903                | 0.0263  | 0.2113  | 65.000 | 100.000 | 171.0801 | 104.0710 | gatB; glutamyl-tRNA(Gln) amidotransferase, B subunit |    |        |    |             |                         |    |    |    |    |   |   |   |   |
|          |                        |                      |         |         | 33.500 | 103.000 | 100.5271 | 103.0000 |                                                      |    |        |    |             |                         |    |    |    |    |   |   |   |   |
| SGO_0440 | 1.671                  | 4.100                | 0.0035  | 0.0167  | 4.000  | 3.000   | 10.5280  | 3.1221   | L-idoitol 2-dehydrogenase BH3949                     |    |        |    |             |                         |    |    |    |    |   |   |   |   |
|          |                        |                      |         |         |        | 3.500   |          | 3.5000   |                                                      |    |        |    |             |                         |    |    |    |    |   |   |   |   |
| SGO_0445 | -0.388                 | 6.403                | 0.0100  | 0.0638  | 6.000  | 21.000  | 15.7920  | 21.8549  | GTP-binding protein                                  |    |        |    |             |                         |    |    |    |    |   |   |   |   |
|          |                        |                      |         |         | 7.000  | 26.000  | 21.0057  | 26.0000  |                                                      |    |        |    |             |                         |    |    |    |    |   |   |   |   |
| SGO_0448 | -1.036                 | 4.384                | 0.0375  | 0.3180  | 1.500  | 10.500  | 3.9480   | 10.9275  | conserved hypothetical protein TIGR00488             |    |        |    |             |                         |    |    |    |    |   |   |   |   |
|          |                        |                      |         |         |        | 6.000   |          | 6.0000   |                                                      |    |        |    |             |                         |    |    |    |    |   |   |   |   |
| SGO_0454 | -0.263                 | 7.542                | 0.0681  | 0.6242  | 10.500 | 54.000  | 27.6360  | 56.1983  | conserved hypothetical protein TIGR01033             |    |        |    |             |                         |    |    |    |    |   |   |   |   |
|          |                        |                      |         |         | 20.000 | 42.500  | 60.0162  | 42.5000  |                                                      |    |        |    |             |                         |    |    |    |    |   |   |   |   |
| SGO_0455 | -3.589                 | 8.338                | 0.0003  | 0.0004  | 3.500  | 155.500 | 9.2120   | 161.8303 | lipoprotein, putative                                |    |        |    |             |                         |    |    |    |    |   |   |   |   |
|          |                        |                      |         |         | 5.500  | 136.000 | 16.5044  | 136.0000 |                                                      |    |        |    |             |                         |    |    |    |    |   |   |   |   |
| SGO_0457 | -1.713                 | 9.432                | 0.0001  | 0.0001  | 30.000 | 245.000 | 78.9600  | 254.9739 | ABC transporter, substrate-binding protein SP0148    |    |        |    |             |                         |    |    |    |    |   |   |   |   |
|          |                        |                      |         |         | 27.500 | 274.500 | 82.5222  | 274.5000 |                                                      |    |        |    |             |                         |    |    |    |    |   |   |   |   |
| SGO_0458 | -1.927                 | 10.927               | 0.0003  | 0.0006  | 74.500 | 801.500 | 196.0841 | 834.1288 | hlpA; lipoprotein                                    |    |        |    |             |                         |    |    |    |    |   |   |   |   |
|          |                        |                      |         |         | 69.500 | 708.500 | 208.5561 | 708.5000 |                                                      |    |        |    |             |                         |    |    |    |    |   |   |   |   |
| SGO_0460 | -2.331                 | 7.671                | 0.0005  | 0.0012  | 6.500  | 91.000  | 17.1080  | 94.7046  | ABC transporter, ATP-binding protein SP0151          |    |        |    |             |                         |    |    |    |    |   |   |   |   |
|          |                        |                      |         |         | 5.500  | 75.500  | 16.5044  | 75.5000  |                                                      |    |        |    |             |                         |    |    |    |    |   |   |   |   |
| SGO_0468 | -0.209                 | 6.214                | 0.0553  | 0.4919  | 7.500  | 12.000  | 19.7400  | 12.4885  | hypothetical protein SGO_0468                        |    |        |    |             |                         |    |    |    |    |   |   |   |   |
|          |                        |                      |         |         | 4.500  | 28.500  | 13.5036  | 28.5000  |                                                      |    |        |    |             |                         |    |    |    |    |   |   |   |   |

- Show detected proteins only  
 Show all proteins

Proteins found:  
624

Filter by category:

ABC Transporter

Test

Cutoff

q-Value

.005

p-Value

|             | Signif | Direction | Applies To   |
|-------------|--------|-----------|--------------|
| Red         | yes    | +         | ratios, bars |
| Yellow      | no     | n/a       | bars         |
| Green       | yes    | -         | ratios, bars |
| Pink        | yes    | +         | p-, q-Values |
| Light Green | yes    | -         | p-, q-Values |

Dot Plots Dot Plots

Summary Table SgFn vs Sg SgPg vs Sg SgPgFn vs Sg SgPg vs SgFn SgPgFn vs SgFn SgPgFn vs SgPg Coverage

| Protein  | SgPgFn vs Sg           |                      |         |         | Raw     |         | Normalized |          | Description                                            | Log <sub>2</sub> Ratios |    |    |   |   |
|----------|------------------------|----------------------|---------|---------|---------|---------|------------|----------|--------------------------------------------------------|-------------------------|----|----|---|---|
|          | Log <sub>2</sub> Ratio | Log <sub>2</sub> Sum | q-Value | p-Value | SgPgFn  | Sg      | SgPgFn     | Sg       |                                                        | -6                      | -4 | -2 | 0 | 2 |
| SGO_0476 | 1.297                  | 6.342                | 0.0002  | 0.0002  | 10.500  | 12.000  | 27.6360    | 12.4885  | rhodanese family protein                               |                         |    |    |   |   |
|          |                        |                      |         |         | 10.000  | 11.000  | 30.0081    | 11.0000  |                                                        |                         |    |    |   |   |
| SGO_0480 | 0.737                  | 3.585                |         |         |         |         |            |          | hypothetical protein SGO_0480                          |                         |    |    |   |   |
|          |                        |                      |         |         | 2.500   | 4.500   | 7.5020     | 4.5000   |                                                        |                         |    |    |   |   |
| SGO_0483 | 0.979                  | 6.445                | 0.0011  | 0.0035  | 11.000  | 17.000  | 28.9520    | 17.6921  | hypothetical protein SGO_0483                          |                         |    |    |   |   |
|          |                        |                      |         |         | 9.500   | 12.000  | 28.5077    | 12.0000  |                                                        |                         |    |    |   |   |
| SGO_0501 | 0.967                  | 7.084                | 0.0000  | 0.0000  | 17.000  | 22.500  | 44.7440    | 23.4160  | Uncharacterized ACR, COG1399                           |                         |    |    |   |   |
|          |                        |                      |         |         | 15.000  | 22.500  | 45.0121    | 22.5000  |                                                        |                         |    |    |   |   |
| SGO_0502 | -1.046                 | 9.757                | 0.0002  | 0.0002  | 52.500  | 291.000 | 138.1801   | 302.8465 | floL; flotillin-like protein                           |                         |    |    |   |   |
|          |                        |                      |         |         | 48.000  | 280.000 | 144.0388   | 280.0000 |                                                        |                         |    |    |   |   |
| SGO_0503 | 1.201                  | 11.183               | 0.0002  | 0.0003  | 322.000 | 350.000 | 847.5045   | 364.2484 | gnd; 6-phosphogluconate dehydrogenase, decarboxylating |                         |    |    |   |   |
|          |                        |                      |         |         | 257.500 | 340.000 | 772.7080   | 340.0000 |                                                        |                         |    |    |   |   |
| SGO_0505 | -3.763                 | 10.957               | 0.0001  | 0.0000  | 24.000  | 911.000 | 63.1680    | 948.0865 | PTS system, IIBC component                             |                         |    |    |   |   |
|          |                        |                      |         |         | 24.500  | 902.500 | 73.5198    | 902.5000 |                                                        |                         |    |    |   |   |
| SGO_0508 | -0.317                 | 6.498                | 0.0061  | 0.0338  | 8.500   | 24.500  | 22.3720    | 25.4974  | nrdR; transcriptional regulator, NrdR family           |                         |    |    |   |   |
|          |                        |                      |         |         | 6.000   | 24.500  | 18.0048    | 24.5000  |                                                        |                         |    |    |   |   |
| SGO_0510 | 1.171                  | 5.714                | 0.0011  | 0.0038  | 7.500   | 6.500   | 19.7400    | 6.7646   | dnaI; primosomal protein DnaI                          |                         |    |    |   |   |
|          |                        |                      |         |         | 5.500   | 9.500   | 16.5044    | 9.5000   |                                                        |                         |    |    |   |   |
| SGO_0511 | 0.216                  | 5.138                | 0.0919  | 0.8722  | 4.000   | 4.500   | 10.5280    | 4.6832   | NADPH-flavin oxidoreductase -like protein              |                         |    |    |   |   |
|          |                        |                      |         |         | 2.500   | 12.500  | 7.5020     | 12.5000  |                                                        |                         |    |    |   |   |
| SGO_0512 | 0.771                  | 8.160                | 0.0043  | 0.0222  | 38.000  | 61.000  | 100.0161   | 63.4833  | GTP-binding protein engA                               |                         |    |    |   |   |
|          |                        |                      |         |         | 26.500  | 43.000  | 79.5214    | 43.0000  |                                                        |                         |    |    |   |   |
| SGO_0515 | 0.490                  | 8.689                | 0.0047  | 0.0250  | 40.500  | 85.500  | 106.5961   | 88.9807  | murC; UDP-N-acetylmuramate--alanine ligase             |                         |    |    |   |   |
|          |                        |                      |         |         | 45.000  | 82.000  | 135.0363   | 82.0000  |                                                        |                         |    |    |   |   |

Show detected proteins only  
 Show all proteins

Filter by category:

Proteins found:  
624

Test Cutoff

| Signif | Direction | Applies To   |
|--------|-----------|--------------|
| yes    | +         | ratios, bars |
| no     | n/a       | bars         |
| yes    | -         | ratios, bars |
| yes    | +         | p-, q-Values |
| yes    | -         | p-, q-Values |

Dot Plots  Dot Plots

Summary Table SgFn vs Sg SgPg vs Sg SgPgFn vs Sg SgPg vs SgFn SgPgFn vs SgFn SgPgFn vs SgPg Coverage

| Protein  | SgPgFn vs Sg           |                      |         |         | Raw    |         | Normalized |          | Description                                                   | Log <sub>2</sub> Ratios |    |    |   |   |
|----------|------------------------|----------------------|---------|---------|--------|---------|------------|----------|---------------------------------------------------------------|-------------------------|----|----|---|---|
|          | Log <sub>2</sub> Ratio | Log <sub>2</sub> Sum | q-Value | p-Value | SgPgFn | Sg      | SgPgFn     | Sg       |                                                               | -6                      | -4 | -2 | 0 | 2 |
| SGO_0518 | -1.560                 | 8.849                | 0.0002  | 0.0001  | 20.000 | 170.000 | 52.6400    | 176.9206 | aminodeoxychorismate lyase-like protein                       |                         |    |    |   |   |
|          |                        |                      |         |         | 21.500 | 167.000 | 64.5174    | 167.0000 |                                                               |                         |    |    |   |   |
| SGO_0519 | 0.177                  | 7.214                | 0.0112  | 0.0744  | 14.500 | 31.000  | 38.1640    | 32.2620  | greA; transcription elongation factor greA                    |                         |    |    |   |   |
|          |                        |                      |         |         | 13.500 | 37.500  | 40.5109    | 37.5000  |                                                               |                         |    |    |   |   |
| SGO_0526 | -0.429                 | 5.467                | 0.0284  | 0.2290  | 3.000  | 8.500   | 7.8960     | 8.8460   | ilvB; acetolactate synthase, large subunit, biosynthetic type |                         |    |    |   |   |
|          |                        |                      |         |         | 3.500  | 17.000  | 10.5028    | 17.0000  |                                                               |                         |    |    |   |   |
| SGO_0527 | -1.584                 | 4.978                | 0.0063  | 0.0350  |        | 12.500  |            | 13.0089  | ilvN; acetolactate synthase, small subunit                    |                         |    |    |   |   |
|          |                        |                      |         |         | 1.500  | 14.000  | 4.5012     | 14.0000  |                                                               |                         |    |    |   |   |
| SGO_0528 | 0.292                  | 8.366                | 0.0128  | 0.0887  | 39.000 | 68.000  | 102.6481   | 70.7683  | ilvC; ketol-acid reductoisomerase                             |                         |    |    |   |   |
|          |                        |                      |         |         | 26.500 | 77.000  | 79.5214    | 77.0000  |                                                               |                         |    |    |   |   |
| SGO_0529 | 1.149                  | 3.915                | 0.0332  | 0.2748  |        | 2.000   |            | 2.0814   | ilvA; threonine dehydratase                                   |                         |    |    |   |   |
|          |                        |                      |         |         | 2.500  | 5.500   | 7.5020     | 5.5000   |                                                               |                         |    |    |   |   |
| SGO_0535 | -2.636                 | 6.736                | 0.0117  | 0.0784  | 3.000  | 42.500  | 7.8960     | 44.2302  | putative transcriptional regulator LytR                       |                         |    |    |   |   |
|          |                        |                      |         |         |        | 54.500  |            | 54.5000  |                                                               |                         |    |    |   |   |
| SGO_0536 | 0.019                  | 7.090                | 0.0847  | 0.7979  | 13.500 | 30.500  | 35.5320    | 31.7416  | hypothetical protein SGO_0536                                 |                         |    |    |   |   |
|          |                        |                      |         |         | 11.000 | 36.000  | 33.0089    | 36.0000  |                                                               |                         |    |    |   |   |
| SGO_0537 | 0.678                  | 6.200                | 0.0029  | 0.0130  | 8.000  | 11.500  | 21.0560    | 11.9682  | HIT family protein                                            |                         |    |    |   |   |
|          |                        |                      |         |         | 8.000  | 16.500  | 24.0065    | 16.5000  |                                                               |                         |    |    |   |   |
| SGO_0540 | -0.100                 | 7.089                | 0.0204  | 0.1589  | 13.000 | 35.500  | 34.2160    | 36.9452  | hypothetical protein SGO_0540                                 |                         |    |    |   |   |
|          |                        |                      |         |         | 10.500 | 33.500  | 31.5085    | 33.5000  |                                                               |                         |    |    |   |   |
| SGO_0543 | -0.940                 | 8.146                | 0.0003  | 0.0004  | 17.000 | 87.500  | 44.7440    | 91.0621  | nusA; transcription termination factor NusA                   |                         |    |    |   |   |
|          |                        |                      |         |         | 17.500 | 95.000  | 52.5141    | 95.0000  |                                                               |                         |    |    |   |   |
| SGO_0546 | -0.475                 | 8.700                | 0.0122  | 0.0836  | 27.500 | 132.500 | 72.3800    | 137.8940 | infB; Translation initiation factor IF-2                      |                         |    |    |   |   |
|          |                        |                      |         |         | 34.000 | 103.500 | 102.0275   | 103.5000 |                                                               |                         |    |    |   |   |

Show detected proteins only  
 Show all proteins  
 Filter by category:

Proteins found: 624

**Test**      **Cutoff**  
     

|             | Signif | Direction | Applies To   |
|-------------|--------|-----------|--------------|
| Red         | yes    | +         | ratios, bars |
| Yellow      | no     | n/a       | bars         |
| Green       | yes    | -         | ratios, bars |
| Pink        | yes    | +         | p-, q-Values |
| Light Green | yes    | -         | p-, q-Values |

[Dot Plots](#)

Summary Table SgFn vs Sg SgPg vs Sg SgPgFn vs Sg SgPg vs SgFn SgPgFn vs SgFn SgPgFn vs SgPg Coverage

| Protein  | SgPgFn vs Sg           |                      |         |         | Raw    |         | Normalized |          | Description                                             | Log <sub>2</sub> Ratios |    |    |   |   |
|----------|------------------------|----------------------|---------|---------|--------|---------|------------|----------|---------------------------------------------------------|-------------------------|----|----|---|---|
|          | Log <sub>2</sub> Ratio | Log <sub>2</sub> Sum | q-Value | p-Value | SgPgFn | Sg      | SgPgFn     | Sg       |                                                         | -6                      | -4 | -2 | 0 | 2 |
| SGO_0548 | -3.700                 | 7.756                | 0.0003  | 0.0004  | 3.000  | 105.000 | 7.8960     | 109.2745 | Na/Pi-cotransporter family protein                      |                         |    |    |   |   |
|          |                        |                      |         |         | 2.500  | 91.500  | 7.5020     | 91.5000  |                                                         |                         |    |    |   |   |
| SGO_0552 | 2.390                  | 6.185                | 0.0004  | 0.0009  | 12.000 | 3.500   | 31.5840    | 3.6425   | oxidoreductase, aldo/keto reductase family              |                         |    |    |   |   |
|          |                        |                      |         |         | 9.500  | 9.000   | 28.5077    | 9.0000   |                                                         |                         |    |    |   |   |
| SGO_0554 | -1.664                 | 6.199                | 0.0395  | 0.3367  | 3.500  | 18.000  | 9.2120     | 18.7328  | hsdR; type I site-specific deoxyribonuclease            |                         |    |    |   |   |
|          |                        |                      |         |         |        | 45.500  |            | 45.5000  |                                                         |                         |    |    |   |   |
| SGO_0558 | 0.263                  | 3.460                |         |         |        |         |            |          | hypothetical protein SGO_0558                           |                         |    |    |   |   |
|          |                        |                      |         |         | 2.000  | 5.000   | 6.0016     | 5.0000   |                                                         |                         |    |    |   |   |
| SGO_0560 | -0.051                 | 5.401                | 0.0810  | 0.7600  | 4.500  | 10.000  | 11.8440    | 10.4071  | hsdM; type I restriction-modification system, M subunit |                         |    |    |   |   |
|          |                        |                      |         |         | 3.000  | 11.000  | 9.0024     | 11.0000  |                                                         |                         |    |    |   |   |
| SGO_0565 | 0.010                  | 7.962                | 0.0921  | 0.8777  | 23.000 | 56.500  | 60.5360    | 58.8001  | adhA; alcohol dehydrogenase                             |                         |    |    |   |   |
|          |                        |                      |         |         | 21.500 | 65.500  | 64.5174    | 65.5000  |                                                         |                         |    |    |   |   |
| SGO_0568 | -0.300                 | 7.076                | 0.0184  | 0.1403  | 9.500  | 34.500  | 25.0040    | 35.9045  | glyQ; glycyl-tRNA synthetase, alpha subunit             |                         |    |    |   |   |
|          |                        |                      |         |         | 12.000 | 38.000  | 36.0097    | 38.0000  |                                                         |                         |    |    |   |   |
| SGO_0569 | 0.301                  | 8.362                | 0.0214  | 0.1686  | 28.000 | 70.000  | 73.6960    | 72.8497  | glyS; glycyl-tRNA synthetase, beta subunit              |                         |    |    |   |   |
|          |                        |                      |         |         | 36.500 | 73.000  | 109.5295   | 73.0000  |                                                         |                         |    |    |   |   |
| SGO_0573 | -1.240                 | 6.233                | 0.0046  | 0.0239  | 3.000  | 20.500  | 7.8960     | 21.3345  | mraW; S-adenosyl-methyltransferase MraW                 |                         |    |    |   |   |
|          |                        |                      |         |         | 5.000  | 31.000  | 15.0040    | 31.0000  |                                                         |                         |    |    |   |   |
| SGO_0577 | 0.118                  | 7.003                | 0.0712  | 0.6568  | 10.000 | 23.500  | 26.3200    | 24.4567  | ATP-dependent RNA helicase                              |                         |    |    |   |   |
|          |                        |                      |         |         | 13.500 | 37.000  | 40.5109    | 37.0000  |                                                         |                         |    |    |   |   |
| SGO_0581 | -0.136                 | 5.652                | 0.0353  | 0.2946  | 4.500  | 11.000  | 11.8440    | 11.4478  | trxB; thioredoxin-disulfide reductase                   |                         |    |    |   |   |
|          |                        |                      |         |         | 4.000  | 15.000  | 12.0032    | 15.0000  |                                                         |                         |    |    |   |   |
| SGO_0582 | 1.063                  | 7.143                | 0.0042  | 0.0212  | 21.500 | 18.000  | 56.5880    | 18.7328  | nicotinate phosphoribosyltransferase, putative          |                         |    |    |   |   |
|          |                        |                      |         |         | 13.000 | 27.000  | 39.0105    | 27.0000  |                                                         |                         |    |    |   |   |

Show detected proteins only  
 Show all proteins

Filter by category:

Proteins found:  
624

Test Cutoff

| Signif | Direction | Applies To   |
|--------|-----------|--------------|
| yes    | +         | ratios, bars |
| no     | n/a       | bars         |
| yes    | -         | ratios, bars |
| yes    | +         | p-, q-Values |
| yes    | -         | p-, q-Values |

Summary Table

SgFn vs Sg

SgPg vs Sg

SgPgFn vs Sg

SgPg vs SgFn

SgPgFn vs SgFn

SgPgFn vs SgPg

Coverage

SgPgFn vs Sg

Raw

Normalized

Log<sub>2</sub> Ratios

| Protein  | SgPgFn vs Sg           |                      |         |         | Raw    |         | Normalized |          | Description                                 | Log <sub>2</sub> Ratios |    |    |   |   |
|----------|------------------------|----------------------|---------|---------|--------|---------|------------|----------|---------------------------------------------|-------------------------|----|----|---|---|
|          | Log <sub>2</sub> Ratio | Log <sub>2</sub> Sum | q-Value | p-Value | SgPgFn | Sg      | SgPgFn     | Sg       |                                             | -6                      | -4 | -2 | 0 | 2 |
| SGO_0583 | 0.732                  | 5.536                | 0.0130  | 0.0915  | 5.000  | 5.500   | 13.1600    | 5.7239   | nadE; NAD+ synthetase                       |                         |    |    |   |   |
|          |                        |                      |         |         | 5.000  | 12.500  | 15.0040    | 12.5000  |                                             |                         |    |    |   |   |
| SGO_0585 | 0.528                  | 6.916                | 0.0092  | 0.0570  | 15.000 | 19.500  | 39.4800    | 20.2938  | pepC; aminopeptidase C                      |                         |    |    |   |   |
|          |                        |                      |         |         | 10.500 | 29.500  | 31.5085    | 29.5000  |                                             |                         |    |    |   |   |
| SGO_0586 | -1.931                 | 8.713                | 0.0001  | 0.0001  | 15.500 | 154.500 | 40.7960    | 160.7896 | pbp1a; penicillin-binding protein 1A        |                         |    |    |   |   |
|          |                        |                      |         |         | 15.500 | 171.500 | 46.5125    | 171.5000 |                                             |                         |    |    |   |   |
| SGO_0589 | 0.840                  | 7.241                | 0.0028  | 0.0124  | 21.000 | 24.000  | 55.2720    | 24.9770  | methylase                                   |                         |    |    |   |   |
|          |                        |                      |         |         | 14.000 | 29.000  | 42.0113    | 29.0000  |                                             |                         |    |    |   |   |
| SGO_0590 | -1.104                 | 5.408                | 0.0263  | 0.2109  | 3.000  | 13.500  | 7.8960     | 14.0496  | Methyltransferase                           |                         |    |    |   |   |
|          |                        |                      |         |         |        | 20.500  |            | 20.5000  |                                             |                         |    |    |   |   |
| SGO_0591 | -3.040                 | 8.906                | 0.0000  | 0.0000  | 9.000  | 208.000 | 23.6880    | 216.4676 | hypothetical protein SGO_0591               |                         |    |    |   |   |
|          |                        |                      |         |         | 9.500  | 211.000 | 28.5077    | 211.0000 |                                             |                         |    |    |   |   |
| SGO_0592 | 0.243                  | 4.825                | 0.0276  | 0.2220  | 4.000  | 8.000   | 10.5280    | 8.3257   | luxS; autoinducer-2 production protein LuxS |                         |    |    |   |   |
|          |                        |                      |         |         |        | 9.500   |            | 9.5000   |                                             |                         |    |    |   |   |
| SGO_0593 | -2.992                 | 8.903                | 0.0001  | 0.0001  | 12.000 | 196.000 | 31.5840    | 203.9791 | HD/KH domain protein                        |                         |    |    |   |   |
|          |                        |                      |         |         | 7.500  | 220.500 | 22.5061    | 220.5000 |                                             |                         |    |    |   |   |
| SGO_0594 | -0.356                 | 6.147                | 0.0097  | 0.0616  | 5.500  | 21.500  | 14.4760    | 22.3753  | gmk; Guanylate kinase (GMP kinase)          |                         |    |    |   |   |
|          |                        |                      |         |         | 5.500  | 17.500  | 16.5044    | 17.5000  |                                             |                         |    |    |   |   |
| SGO_0595 | -0.733                 | 7.101                | 0.0004  | 0.0006  | 10.500 | 40.500  | 27.6360    | 42.1487  | DNA-directed RNA polymerase, omega subunit  |                         |    |    |   |   |
|          |                        |                      |         |         | 8.000  | 43.500  | 24.0065    | 43.5000  |                                             |                         |    |    |   |   |
| SGO_0597 | 0.482                  | 5.192                | 0.0290  | 0.2349  | 4.500  | 5.000   | 11.8440    | 5.2035   | fmt; methionyl-tRNA formyltransferase       |                         |    |    |   |   |
|          |                        |                      |         |         | 3.000  | 10.500  | 9.0024     | 10.5000  |                                             |                         |    |    |   |   |
| SGO_0599 | -0.816                 | 6.954                | 0.0019  | 0.0077  | 7.000  | 39.000  | 18.4240    | 40.5877  | phosphoprotein phosphatase                  |                         |    |    |   |   |
|          |                        |                      |         |         | 9.000  | 38.000  | 27.0073    | 38.0000  |                                             |                         |    |    |   |   |

- Show detected proteins only  
 Show all proteins

Proteins found:  
624

Filter by category:

ABC Transporter

Test

Cutoff

q-Value

.005

p-Value

|             | Signif | Direction | Applies To   |
|-------------|--------|-----------|--------------|
| Red         | yes    | +         | ratios, bars |
| Yellow      | no     | n/a       | bars         |
| Green       | yes    | -         | ratios, bars |
| Pink        | yes    | +         | p-, q-Values |
| Light Green | yes    | -         | p-, q-Values |

Dot Plots Dot Plots

Summary Table SgFn vs Sg SgPg vs Sg SgPgFn vs Sg SgPg vs SgFn SgPgFn vs SgFn SgPgFn vs SgPg Coverage

| Protein  | SgPgFn vs Sg           |                      |         |         | Raw    |         | Normalized |          | Description                                                                                   | Log <sub>2</sub> Ratios |    |    |   |   |
|----------|------------------------|----------------------|---------|---------|--------|---------|------------|----------|-----------------------------------------------------------------------------------------------|-------------------------|----|----|---|---|
|          | Log <sub>2</sub> Ratio | Log <sub>2</sub> Sum | q-Value | p-Value | SgPgFn | Sg      | SgPgFn     | Sg       |                                                                                               | -6                      | -4 | -2 | 0 | 2 |
| SGO_0600 | -3.243                 | 7.883                | 0.0037  | 0.0182  | 4.500  | 105.000 | 11.8440    | 109.2745 | serine/threonine protein kinase                                                               |                         |    |    |   |   |
|          |                        |                      |         |         |        | 115.000 |            | 115.0000 |                                                                                               |                         |    |    |   |   |
| SGO_0604 | 0.298                  | 7.959                | 0.0102  | 0.0659  | 27.500 | 47.500  | 72.3800    | 49.4337  | hydrolase, haloacid dehalogenase family/peptidyl-prolyl cis-trans isomerase, cyclophilin type |                         |    |    |   |   |
|          |                        |                      |         |         | 21.500 | 62.500  | 64.5174    | 62.5000  |                                                                                               |                         |    |    |   |   |
| SGO_0606 | -0.436                 | 9.248                | 0.0006  | 0.0014  | 48.000 | 162.000 | 126.3361   | 168.5950 | cysK; cysteine synthase A                                                                     |                         |    |    |   |   |
|          |                        |                      |         |         | 44.000 | 181.000 | 132.0355   | 181.0000 |                                                                                               |                         |    |    |   |   |
| SGO_0610 | 0.525                  | 8.478                | 0.0148  | 0.1065  | 50.000 | 75.000  | 131.6001   | 78.0532  | ribosomal subunit interface protein                                                           |                         |    |    |   |   |
|          |                        |                      |         |         | 27.000 | 66.000  | 81.0218    | 66.0000  |                                                                                               |                         |    |    |   |   |
| SGO_0626 | -1.685                 | 5.612                | 0.0032  | 0.0150  | 2.500  | 20.000  | 6.5800     | 20.8142  | recX; Regulatory protein recX                                                                 |                         |    |    |   |   |
|          |                        |                      |         |         |        | 21.500  |            | 21.5000  |                                                                                               |                         |    |    |   |   |
| SGO_0631 | 2.433                  | 5.206                | 0.0084  | 0.0510  | 6.000  | 3.000   | 15.7920    | 3.1221   | alpha-glycerophosphate oxidase                                                                |                         |    |    |   |   |
|          |                        |                      |         |         | 6.000  |         | 18.0048    |          |                                                                                               |                         |    |    |   |   |
| SGO_0639 | -0.081                 | 8.001                | 0.0655  | 0.5956  | 27.000 | 65.500  | 71.0640    | 68.1665  | valS; valyl-tRNA synthetase                                                                   |                         |    |    |   |   |
|          |                        |                      |         |         | 18.000 | 63.000  | 54.0145    | 63.0000  |                                                                                               |                         |    |    |   |   |
| SGO_0640 | 2.061                  | 4.870                | 0.0095  | 0.0595  |        | 6.000   |            | 6.2443   | modification methylase                                                                        |                         |    |    |   |   |
|          |                        |                      |         |         | 6.500  | 3.500   | 19.5052    | 3.5000   |                                                                                               |                         |    |    |   |   |
| SGO_0641 | -0.590                 | 6.661                | 0.0043  | 0.0221  | 8.500  | 32.500  | 22.3720    | 33.8231  | ATPase, histidine kinase-, DNA gyrase B-, and HSP90-like domain protein protein               |                         |    |    |   |   |
|          |                        |                      |         |         | 6.000  | 27.000  | 18.0048    | 27.0000  |                                                                                               |                         |    |    |   |   |
| SGO_0642 | 1.284                  | 8.338                | 0.0006  | 0.0014  | 46.500 | 39.500  | 122.3881   | 41.1080  | hypothetical protein SGO_0642                                                                 |                         |    |    |   |   |
|          |                        |                      |         |         | 35.500 | 53.500  | 106.5287   | 53.5000  |                                                                                               |                         |    |    |   |   |
| SGO_0643 | -0.469                 | 4.323                | 0.0371  | 0.3127  | 2.000  | 6.000   | 5.2640     | 6.2443   | cytosine-specific methyltransferase                                                           |                         |    |    |   |   |
|          |                        |                      |         |         |        | 8.500   |            | 8.5000   |                                                                                               |                         |    |    |   |   |
| SGO_0644 | 0.731                  | 6.424                | 0.0024  | 0.0102  | 9.000  | 16.000  | 23.6880    | 16.6514  | hypothetical protein SGO_0644                                                                 |                         |    |    |   |   |
|          |                        |                      |         |         | 10.000 | 15.500  | 30.0081    | 15.5000  |                                                                                               |                         |    |    |   |   |

Show detected proteins only  
 Show all proteins  
 Filter by category:

Proteins found: 624

**Test**      **Cutoff**  
     

|  | Signif | Direction | Applies To   |
|--|--------|-----------|--------------|
|  | yes    | +         | ratios, bars |
|  | no     | n/a       | bars         |
|  | yes    | -         | ratios, bars |
|  | yes    | +         | p-, q-Values |
|  | yes    | -         | p-, q-Values |

Dot Plots  Dot Plots

Summary Table

SgFn vs Sg

SgPg vs Sg

SgPgFn vs Sg

SgPg vs SgFn

SgPgFn vs SgFn

SgPgFn vs SgPg

Coverage

SgPgFn vs Sg

Raw

Normalized

Log<sub>2</sub> Ratios

| Protein  | SgPgFn vs Sg           |                      |         |         | Raw     |         |          |          | Normalized |    |        |    | Description | Log <sub>2</sub> Ratios |    |    |    |    |   |   |   |   |  |  |  |
|----------|------------------------|----------------------|---------|---------|---------|---------|----------|----------|------------|----|--------|----|-------------|-------------------------|----|----|----|----|---|---|---|---|--|--|--|
|          | Log <sub>2</sub> Ratio | Log <sub>2</sub> Sum | q-Value | p-Value | SgPgFn  | Sg      | SgPgFn   | Sg       | SgPgFn     | Sg | SgPgFn | Sg |             | SgPgFn                  | Sg | -6 | -4 | -2 | 0 | 2 | 4 | 6 |  |  |  |
| SGO_0652 | -3.269                 | 7.309                | 0.0001  | 0.0000  | 3.500   | 71.000  | 9.2120   | 73.8904  |            |    |        |    |             |                         |    |    |    |    |   |   |   |   |  |  |  |
|          |                        |                      |         |         | 2.000   | 69.500  | 6.0016   | 69.5000  |            |    |        |    |             |                         |    |    |    |    |   |   |   |   |  |  |  |
| SGO_0654 | -1.356                 | 7.923                | 0.0011  | 0.0036  | 14.500  | 74.000  | 38.1640  | 77.0125  |            |    |        |    |             |                         |    |    |    |    |   |   |   |   |  |  |  |
|          |                        |                      |         |         | 10.000  | 97.500  | 30.0081  | 97.5000  |            |    |        |    |             |                         |    |    |    |    |   |   |   |   |  |  |  |
| SGO_0656 | -0.917                 | 5.799                | 0.0092  | 0.0574  | 5.500   | 17.000  | 14.4760  | 17.6921  |            |    |        |    |             |                         |    |    |    |    |   |   |   |   |  |  |  |
|          |                        |                      |         |         | 2.000   | 17.500  | 6.0016   | 17.5000  |            |    |        |    |             |                         |    |    |    |    |   |   |   |   |  |  |  |
| SGO_0665 | -0.506                 | 10.265               | 0.0144  | 0.1037  | 115.500 | 405.500 | 303.9962 | 422.0077 |            |    |        |    |             |                         |    |    |    |    |   |   |   |   |  |  |  |
|          |                        |                      |         |         | 68.500  | 298.500 | 205.5553 | 298.5000 |            |    |        |    |             |                         |    |    |    |    |   |   |   |   |  |  |  |
| SGO_0669 | 0.640                  | 8.090                | 0.0006  | 0.0015  | 30.000  | 49.000  | 78.9600  | 50.9948  |            |    |        |    |             |                         |    |    |    |    |   |   |   |   |  |  |  |
|          |                        |                      |         |         | 29.000  | 55.500  | 87.0234  | 55.5000  |            |    |        |    |             |                         |    |    |    |    |   |   |   |   |  |  |  |
| SGO_0671 | -0.744                 | 6.613                | 0.0005  | 0.0010  | 6.500   | 30.500  | 17.1080  | 31.7416  |            |    |        |    |             |                         |    |    |    |    |   |   |   |   |  |  |  |
|          |                        |                      |         |         | 6.500   | 29.500  | 19.5052  | 29.5000  |            |    |        |    |             |                         |    |    |    |    |   |   |   |   |  |  |  |
| SGO_0672 | -3.241                 | 6.316                | 0.0161  | 0.1181  | 1.500   | 42.500  | 3.9480   | 44.2302  |            |    |        |    |             |                         |    |    |    |    |   |   |   |   |  |  |  |
|          |                        |                      |         |         |         | 31.500  |          | 31.5000  |            |    |        |    |             |                         |    |    |    |    |   |   |   |   |  |  |  |
| SGO_0673 | -2.920                 | 6.420                | 0.0136  | 0.0962  | 2.000   | 33.500  | 5.2640   | 34.8638  |            |    |        |    |             |                         |    |    |    |    |   |   |   |   |  |  |  |
|          |                        |                      |         |         |         | 45.500  |          | 45.5000  |            |    |        |    |             |                         |    |    |    |    |   |   |   |   |  |  |  |
| SGO_0674 | 0.429                  | 9.145                | 0.0011  | 0.0037  | 58.500  | 114.000 | 153.9721 | 118.6409 |            |    |        |    |             |                         |    |    |    |    |   |   |   |   |  |  |  |
|          |                        |                      |         |         | 57.000  | 122.500 | 171.0460 | 122.5000 |            |    |        |    |             |                         |    |    |    |    |   |   |   |   |  |  |  |
| SGO_0675 | 0.860                  | 9.992                | 0.0013  | 0.0044  | 121.000 | 145.500 | 318.4722 | 151.4232 |            |    |        |    |             |                         |    |    |    |    |   |   |   |   |  |  |  |
|          |                        |                      |         |         | 111.500 | 213.500 | 334.5901 | 213.5000 |            |    |        |    |             |                         |    |    |    |    |   |   |   |   |  |  |  |
| SGO_0676 | -0.086                 | 5.997                | 0.0553  | 0.4930  | 6.000   | 13.500  | 15.7920  | 14.0496  |            |    |        |    |             |                         |    |    |    |    |   |   |   |   |  |  |  |
|          |                        |                      |         |         | 5.000   | 19.000  | 15.0040  | 19.0000  |            |    |        |    |             |                         |    |    |    |    |   |   |   |   |  |  |  |
| SGO_0677 | -0.787                 | 8.346                | 0.0071  | 0.0406  | 29.000  | 111.000 | 76.3280  | 115.5188 |            |    |        |    |             |                         |    |    |    |    |   |   |   |   |  |  |  |
|          |                        |                      |         |         | 15.000  | 88.500  | 45.0121  | 88.5000  |            |    |        |    |             |                         |    |    |    |    |   |   |   |   |  |  |  |

- Show detected proteins only  
 Show all proteins

Proteins found:  
624

Filter by category:

ABC Transporter

Test

Cutoff

q-Value

.005

p-Value

|             | Signif | Direction | Applies To   |
|-------------|--------|-----------|--------------|
| Red         | yes    | +         | ratios, bars |
| Yellow      | no     | n/a       | bars         |
| Green       | yes    | -         | ratios, bars |
| Pink        | yes    | +         | p-, q-Values |
| Light Green | yes    | -         | p-, q-Values |

Dot Plots Dot Plots



Summary Table SgFn vs Sg SgPg vs Sg SgPgFn vs Sg SgPg vs SgFn SgPgFn vs SgFn SgPgFn vs SgPg Coverage

| Protein  | SgPgFn vs Sg           |                      |         |         | Raw     |          | Normalized |           | Description                                                     | Log <sub>2</sub> Ratios |    |    |   |   |   |   |
|----------|------------------------|----------------------|---------|---------|---------|----------|------------|-----------|-----------------------------------------------------------------|-------------------------|----|----|---|---|---|---|
|          | Log <sub>2</sub> Ratio | Log <sub>2</sub> Sum | q-Value | p-Value | SgPgFn  | Sg       | SgPgFn     | Sg        |                                                                 | -6                      | -4 | -2 | 0 | 2 | 4 | 6 |
| SGO_0680 | 0.360                  | 8.769                | 0.0084  | 0.0506  | 41.000  | 93.500   | 107.9121   | 97.3063   | cell division protein DivIVA                                    |                         |    |    |   |   |   |   |
|          |                        |                      |         |         | 46.000  | 93.000   | 138.0372   | 93.0000   |                                                                 |                         |    |    |   |   |   |   |
| SGO_0681 | 0.282                  | 8.622                | 0.0122  | 0.0830  | 42.500  | 74.500   | 111.8601   | 77.5329   | ileS; isoleucyl-tRNA synthetase                                 |                         |    |    |   |   |   |   |
|          |                        |                      |         |         | 34.500  | 101.000  | 103.5279   | 101.0000  |                                                                 |                         |    |    |   |   |   |   |
| SGO_0684 | -0.754                 | 8.337                | 0.0001  | 0.0000  | 23.500  | 97.000   | 61.8520    | 100.9488  | hypothetical protein SGO_0684                                   |                         |    |    |   |   |   |   |
|          |                        |                      |         |         | 19.500  | 102.000  | 58.5157    | 102.0000  |                                                                 |                         |    |    |   |   |   |   |
| SGO_0688 | -0.604                 | 7.948                | 0.0002  | 0.0003  | 19.000  | 73.500   | 50.0080    | 76.4922   | ATP dependent Clp protease, ATP-binding subunit, ClpE           |                         |    |    |   |   |   |   |
|          |                        |                      |         |         | 16.000  | 72.500   | 48.0129    | 72.5000   |                                                                 |                         |    |    |   |   |   |   |
| SGO_0693 | -2.019                 | 5.369                | 0.0151  | 0.1091  |         | 20.000   |            | 20.8142   | xseA; exodeoxyribonuclease VII, large subunit                   |                         |    |    |   |   |   |   |
|          |                        |                      |         |         | 1.500   | 16.000   | 4.5012     | 16.0000   |                                                                 |                         |    |    |   |   |   |   |
| SGO_0700 | -0.170                 | 5.972                | 0.0741  | 0.6885  | 4.000   | 18.500   | 10.5280    | 19.2531   | DegV family protein                                             |                         |    |    |   |   |   |   |
|          |                        |                      |         |         | 6.500   | 13.500   | 19.5052    | 13.5000   |                                                                 |                         |    |    |   |   |   |   |
| SGO_0701 | 0.991                  | 12.614               | 0.0019  | 0.0078  | 898.500 | 1072.000 | 2364.8534  | 1115.6407 | hup; DNA-binding histone-like protein HU                        |                         |    |    |   |   |   |   |
|          |                        |                      |         |         | 605.000 | 974.000  | 1815.4886  | 974.0000  |                                                                 |                         |    |    |   |   |   |   |
| SGO_0704 | 2.431                  | 11.636               | 0.0001  | 0.0001  | 501.500 | 193.000  | 1319.9488  | 200.8570  | gpmA; 2,3-bisphosphoglycerate-dependent phosphoglycerate mutase |                         |    |    |   |   |   |   |
|          |                        |                      |         |         | 452.000 | 306.500  | 1356.3651  | 306.5000  |                                                                 |                         |    |    |   |   |   |   |
| SGO_0706 | 1.279                  | 4.295                | 0.0196  | 0.1513  |         | 3.000    |            | 3.1221    | phoH-like protein                                               |                         |    |    |   |   |   |   |
|          |                        |                      |         |         | 3.500   | 6.000    | 10.5028    | 6.0000    |                                                                 |                         |    |    |   |   |   |   |
| SGO_0707 | -4.949                 | 8.783                | 0.0000  | 0.0000  | 4.000   | 206.000  | 10.5280    | 214.3862  | LPXTG cell wall surface protein                                 |                         |    |    |   |   |   |   |
|          |                        |                      |         |         | 1.500   | 211.000  | 4.5012     | 211.0000  |                                                                 |                         |    |    |   |   |   |   |
| SGO_0708 | 0.711                  | 9.617                | 0.0018  | 0.0071  | 83.500  | 137.000  | 219.7721   | 142.5772  | ald; alanine dehydrogenase                                      |                         |    |    |   |   |   |   |
|          |                        |                      |         |         | 89.500  | 154.500  | 268.5723   | 154.5000  |                                                                 |                         |    |    |   |   |   |   |
| SGO_0713 | 0.405                  | 7.070                | 0.0056  | 0.0304  | 16.000  | 29.500   | 42.1120    | 30.7009   | sgg; GTP-binding protein Era                                    |                         |    |    |   |   |   |   |
|          |                        |                      |         |         | 11.500  | 27.000   | 34.5093    | 27.0000   |                                                                 |                         |    |    |   |   |   |   |

- Show detected proteins only
- Show all proteins

Proteins found: 624

Filter by category:  
ABC Transporter

Test Cutoff

q-Value

.005

p-Value

| Signif | Direction | Applies To   |
|--------|-----------|--------------|
| yes    | +         | ratios, bars |
| no     | n/a       | bars         |
| yes    | -         | ratios, bars |
| yes    | +         | p-, q-Values |
| yes    | -         | p-, q-Values |

Dot Plots Dot Plots

Summary Table

SgFn vs Sg

SgPg vs Sg

SgPgFn vs Sg

SgPg vs SgFn

SgPgFn vs SgFn

SgPgFn vs SgPg

Coverage

SgPgFn vs Sg

Raw

Normalized

Log<sub>2</sub> Ratios

| Protein  | SgPgFn vs Sg           |                      |         |         | Raw    |         | Normalized |          | Description                                           | Log <sub>2</sub> Ratios |    |    |   |   |   |   |
|----------|------------------------|----------------------|---------|---------|--------|---------|------------|----------|-------------------------------------------------------|-------------------------|----|----|---|---|---|---|
|          | Log <sub>2</sub> Ratio | Log <sub>2</sub> Sum | q-Value | p-Value | SgPgFn | Sg      | SgPgFn     | Sg       |                                                       | -6                      | -4 | -2 | 0 | 2 | 4 | 6 |
| SGO_0721 | 0.287                  | 5.501                | 0.0435  | 0.3781  | 7.000  | 8.500   | 18.4240    | 8.8460   | abpB-like dipeptidase lipoprotein                     |                         |    |    |   |   |   |   |
|          |                        |                      |         |         | 2.500  | 10.500  | 7.5020     | 10.5000  |                                                       |                         |    |    |   |   |   |   |
| SGO_0736 | -1.951                 | 5.113                | 0.0111  | 0.0738  | 1.500  | 16.000  | 3.9480     | 16.6514  | hprK; HPr(Ser) kinase/phosphatase                     |                         |    |    |   |   |   |   |
|          |                        |                      |         |         |        | 14.000  |            | 14.0000  |                                                       |                         |    |    |   |   |   |   |
| SGO_0739 | 0.854                  | 5.875                | 0.0006  | 0.0015  | 7.500  | 11.000  | 19.7400    | 11.4478  | hypothetical protein SGO_0739                         |                         |    |    |   |   |   |   |
|          |                        |                      |         |         | 6.000  | 9.500   | 18.0048    | 9.5000   |                                                       |                         |    |    |   |   |   |   |
| SGO_0742 | 0.136                  | 5.701                | 0.0463  | 0.4048  | 7.000  | 15.000  | 18.4240    | 15.6106  | peptidase, U32 family                                 |                         |    |    |   |   |   |   |
|          |                        |                      |         |         |        | 18.000  |            | 18.0000  |                                                       |                         |    |    |   |   |   |   |
| SGO_0743 | -1.304                 | 7.921                | 0.0007  | 0.0019  | 10.500 | 80.000  | 27.6360    | 83.2568  | peptidase, U32 family                                 |                         |    |    |   |   |   |   |
|          |                        |                      |         |         | 14.500 | 88.000  | 43.5117    | 88.0000  |                                                       |                         |    |    |   |   |   |   |
| SGO_0745 | 2.462                  | 7.139                | 0.0015  | 0.0057  | 27.000 | 8.000   | 71.0640    | 8.3257   | hypothetical protein SGO_0745                         |                         |    |    |   |   |   |   |
|          |                        |                      |         |         | 16.000 | 13.500  | 48.0129    | 13.5000  |                                                       |                         |    |    |   |   |   |   |
| SGO_0749 | 0.577                  | 6.407                | 0.0069  | 0.0395  | 10.000 | 13.000  | 26.3200    | 13.5292  | glutathione reductase                                 |                         |    |    |   |   |   |   |
|          |                        |                      |         |         | 8.000  | 21.000  | 24.0065    | 21.0000  |                                                       |                         |    |    |   |   |   |   |
| SGO_0750 | -2.349                 | 10.625               | 0.0005  | 0.0012  | 52.500 | 708.000 | 138.1801   | 736.8224 | efflux transporter, RND family, MFP subunit subfamily |                         |    |    |   |   |   |   |
|          |                        |                      |         |         | 40.000 | 584.500 | 120.0323   | 584.5000 |                                                       |                         |    |    |   |   |   |   |
| SGO_0751 | 0.176                  | 8.439                | 0.0142  | 0.1021  | 37.500 | 82.500  | 98.7001    | 85.8585  | ABC transporter, ATP-binding protein SP0786           |                         |    |    |   |   |   |   |
|          |                        |                      |         |         | 28.500 | 77.000  | 85.5230    | 77.0000  |                                                       |                         |    |    |   |   |   |   |
| SGO_0752 | -2.977                 | 7.247                | 0.0130  | 0.0914  |        | 60.000  |            | 62.4426  | ABC transporter, ATP-binding protein                  |                         |    |    |   |   |   |   |
|          |                        |                      |         |         | 3.000  | 80.500  | 9.0024     | 80.5000  |                                                       |                         |    |    |   |   |   |   |
| SGO_0753 | -0.113                 | 9.075                | 0.0303  | 0.2481  | 46.000 | 144.000 | 121.0721   | 149.8622 | lysS; lysyl-tRNA synthetase                           |                         |    |    |   |   |   |   |
|          |                        |                      |         |         | 46.000 | 130.500 | 138.0372   | 130.5000 |                                                       |                         |    |    |   |   |   |   |
| SGO_0755 | -0.282                 | 4.691                | 0.0355  | 0.2972  |        | 8.000   |            | 8.3257   | regulatory protein                                    |                         |    |    |   |   |   |   |
|          |                        |                      |         |         | 2.500  | 10.000  | 7.5020     | 10.0000  |                                                       |                         |    |    |   |   |   |   |

- Show detected proteins only  
 Show all proteins

Proteins found:  
624

Filter by category:

ABC Transporter

Test

Cutoff

q-Value

.005

p-Value

|             | Signif | Direction | Applies To   |
|-------------|--------|-----------|--------------|
| Red         | yes    | +         | ratios, bars |
| Yellow      | no     | n/a       | bars         |
| Green       | yes    | -         | ratios, bars |
| Pink        | yes    | +         | p-, q-Values |
| Light Green | yes    | -         | p-, q-Values |

Dot Plots Dot Plots

Summary Table

SgFn vs Sg

SgPg vs Sg

SgPgFn vs Sg

SgPg vs SgFn

SgPgFn vs SgFn

SgPgFn vs SgPg

Coverage

SgPgFn vs Sg

Raw

Normalized

Log<sub>2</sub> Ratios

| Protein  | SgPgFn vs Sg           |                      |         |         | Raw      |          |           |           | Normalized                                                |    |        |    | Description | Log <sub>2</sub> Ratios |    |    |   |   |   |   |
|----------|------------------------|----------------------|---------|---------|----------|----------|-----------|-----------|-----------------------------------------------------------|----|--------|----|-------------|-------------------------|----|----|---|---|---|---|
|          | Log <sub>2</sub> Ratio | Log <sub>2</sub> Sum | q-Value | p-Value | SgPgFn   | Sg       | SgPgFn    | Sg        | SgPgFn                                                    | Sg | SgPgFn | Sg |             | -6                      | -4 | -2 | 0 | 2 | 4 | 6 |
| SGO_0760 | 0.431                  | 9.163                | 0.0019  | 0.0079  | 67.000   | 117.000  | 176.3441  | 121.7630  | ppc; phosphoenolpyruvate carboxylase                      |    |        |    |             |                         |    |    |   |   |   |   |
|          |                        |                      |         |         | 51.000   | 122.000  | 153.0412  | 122.0000  |                                                           |    |        |    |             |                         |    |    |   |   |   |   |
| SGO_0761 | 0.656                  | 13.549               | 0.0001  | 0.0000  | 1410.000 | 2223.000 | 3711.1221 | 2313.4975 | tuf; translation elongation factor Tu                     |    |        |    |             |                         |    |    |   |   |   |   |
|          |                        |                      |         |         | 1207.500 | 2341.000 | 3623.4753 | 2341.0000 |                                                           |    |        |    |             |                         |    |    |   |   |   |   |
| SGO_0762 | 1.175                  | 11.402               | 0.0039  | 0.0197  | 436.000  | 384.500  | 1147.5527 | 400.1528  | tpiA; triosephosphate isomerase                           |    |        |    |             |                         |    |    |   |   |   |   |
|          |                        |                      |         |         | 247.000  | 417.000  | 741.1995  | 417.0000  |                                                           |    |        |    |             |                         |    |    |   |   |   |   |
| SGO_0763 | -1.499                 | 8.053                | 0.0010  | 0.0030  | 17.500   | 87.500   | 46.0600   | 91.0621   | murA-1; UDP-N-acetylglucosamine 1-carboxyvinyltransferase |    |        |    |             |                         |    |    |   |   |   |   |
|          |                        |                      |         |         | 8.500    | 103.000  | 25.5069   | 103.0000  |                                                           |    |        |    |             |                         |    |    |   |   |   |   |
| SGO_0771 | 0.699                  | 7.925                | 0.0046  | 0.0243  | 28.000   | 56.000   | 73.6960   | 58.2797   | pepq; proline dipeptidase                                 |    |        |    |             |                         |    |    |   |   |   |   |
|          |                        |                      |         |         | 25.000   | 36.000   | 75.0202   | 36.0000   |                                                           |    |        |    |             |                         |    |    |   |   |   |   |
| SGO_0773 | -2.492                 | 10.209               | 0.0001  | 0.0001  | 32.000   | 508.000  | 84.2240   | 528.6805  | ccpA; catabolite control protein A                        |    |        |    |             |                         |    |    |   |   |   |   |
|          |                        |                      |         |         | 31.500   | 476.500  | 94.5254   | 476.5000  |                                                           |    |        |    |             |                         |    |    |   |   |   |   |
| SGO_0774 | -1.853                 | 6.904                | 0.0142  | 0.1017  | 5.500    | 56.500   | 14.4760   | 58.8001   | glycosyl transferase, group 1 family protein              |    |        |    |             |                         |    |    |   |   |   |   |
|          |                        |                      |         |         |          | 46.500   |           | 46.5000   |                                                           |    |        |    |             |                         |    |    |   |   |   |   |
| SGO_0775 | -1.162                 | 6.276                | 0.0009  | 0.0028  | 4.500    | 28.500   | 11.8440   | 29.6602   | glycosyl transferase, group 1                             |    |        |    |             |                         |    |    |   |   |   |   |
|          |                        |                      |         |         | 4.000    | 24.000   | 12.0032   | 24.0000   |                                                           |    |        |    |             |                         |    |    |   |   |   |   |
| SGO_0778 | -0.413                 | 9.110                | 0.0003  | 0.0004  | 45.000   | 148.000  | 118.4401  | 154.0250  | thrS; threonyl-tRNA synthetase                            |    |        |    |             |                         |    |    |   |   |   |   |
|          |                        |                      |         |         | 39.500   | 161.500  | 118.5319  | 161.5000  |                                                           |    |        |    |             |                         |    |    |   |   |   |   |
| SGO_0779 | -1.147                 | 6.246                | 0.0082  | 0.0488  | 6.500    | 19.500   | 17.1080   | 20.2938   | response regulator                                        |    |        |    |             |                         |    |    |   |   |   |   |
|          |                        |                      |         |         | 2.500    | 31.000   | 7.5020    | 31.0000   |                                                           |    |        |    |             |                         |    |    |   |   |   |   |
| SGO_0784 | -2.876                 | 8.139                | 0.0005  | 0.0010  | 6.500    | 105.500  | 17.1080   | 109.7949  | smc; chromosome segregation protein SMC                   |    |        |    |             |                         |    |    |   |   |   |   |
|          |                        |                      |         |         | 5.500    | 138.500  | 16.5044   | 138.5000  |                                                           |    |        |    |             |                         |    |    |   |   |   |   |
| SGO_0786 | 0.377                  | 5.816                | 0.0142  | 0.1012  | 7.000    | 10.500   | 18.4240   | 10.9275   | Cof family protein                                        |    |        |    |             |                         |    |    |   |   |   |   |
|          |                        |                      |         |         | 4.500    | 13.500   | 13.5036   | 13.5000   |                                                           |    |        |    |             |                         |    |    |   |   |   |   |

- Show detected proteins only  
 Show all proteins

Proteins found:  
624

Filter by category:

ABC Transporter

Test

Cutoff

q-Value

.005

p-Value

|             | Signif | Direction | Applies To   |
|-------------|--------|-----------|--------------|
| Red         | yes    | +         | ratios, bars |
| Yellow      | no     | n/a       | bars         |
| Green       | yes    | -         | ratios, bars |
| Pink        | yes    | +         | p-, q-Values |
| Light Green | yes    | -         | p-, q-Values |

Dot Plots Dot Plots

Summary Table SgFn vs Sg SgPg vs Sg SgPgFn vs Sg SgPg vs SgFn SgPgFn vs SgFn SgPgFn vs SgPg Coverage

| Protein  | SgPgFn vs Sg           |                      |         |         | Raw    |        | Normalized |         | Description                                 | Log <sub>2</sub> Ratios |    |    |   |   |
|----------|------------------------|----------------------|---------|---------|--------|--------|------------|---------|---------------------------------------------|-------------------------|----|----|---|---|
|          | Log <sub>2</sub> Ratio | Log <sub>2</sub> Sum | q-Value | p-Value | SgPgFn | Sg     | SgPgFn     | Sg      |                                             | -6                      | -4 | -2 | 0 | 2 |
| SGO_0787 | -0.953                 | 7.335                | 0.0016  | 0.0064  | 9.000  | 56.000 | 23.6880    | 58.2797 | ftsY; cell division protein FtsY            |                         |    |    |   |   |
|          |                        |                      |         |         | 10.500 | 48.000 | 31.5085    | 48.0000 |                                             |                         |    |    |   |   |
| SGO_0788 | 1.161                  | 7.380                | 0.0002  | 0.0002  | 22.000 | 27.000 | 57.9040    | 28.0992 | zwf; glucose-6-phosphate 1-dehydrogenase    |                         |    |    |   |   |
|          |                        |                      |         |         | 19.000 | 23.500 | 57.0153    | 23.5000 |                                             |                         |    |    |   |   |
| SGO_0792 | -0.372                 | 7.330                | 0.0097  | 0.0613  | 14.000 | 38.000 | 36.8480    | 39.5470 | hypothetical protein SGO_0792               |                         |    |    |   |   |
|          |                        |                      |         |         | 11.000 | 51.500 | 33.0089    | 51.5000 |                                             |                         |    |    |   |   |
| SGO_0794 | -0.592                 | 7.547                | 0.0015  | 0.0055  | 13.500 | 50.000 | 35.5320    | 52.0355 | metallo-beta-lactamase family protein       |                         |    |    |   |   |
|          |                        |                      |         |         | 13.000 | 60.500 | 39.0105    | 60.5000 |                                             |                         |    |    |   |   |
| SGO_0795 | 0.525                  | 4.707                | 0.0008  | 0.0022  | 3.000  | 5.500  | 7.8960     | 5.7239  | tributylin esterase                         |                         |    |    |   |   |
|          |                        |                      |         |         | 2.500  | 5.000  | 7.5020     | 5.0000  |                                             |                         |    |    |   |   |
| SGO_0798 | -1.346                 | 7.742                | 0.0005  | 0.0011  | 11.500 | 80.000 | 30.2680    | 83.2568 | ABC transporter, ATP-binding protein SP1381 |                         |    |    |   |   |
|          |                        |                      |         |         | 10.000 | 70.500 | 30.0081    | 70.5000 |                                             |                         |    |    |   |   |
| SGO_0800 | -1.735                 | 6.211                | 0.0329  | 0.2721  | 3.500  | 21.000 | 9.2120     | 21.8549 | polysaccharide deacetylase family protein   |                         |    |    |   |   |
|          |                        |                      |         |         |        | 43.000 |            | 43.0000 |                                             |                         |    |    |   |   |
| SGO_0801 | 0.695                  | 8.684                | 0.0080  | 0.0468  | 58.500 | 80.500 | 153.9721   | 83.7771 | hom; homoserine dehydrogenase               |                         |    |    |   |   |
|          |                        |                      |         |         | 34.000 | 71.500 | 102.0275   | 71.5000 |                                             |                         |    |    |   |   |
| SGO_0802 | -0.222                 | 6.252                | 0.0335  | 0.2779  | 5.500  | 18.500 | 14.4760    | 19.2531 | thrB; homoserine kinase                     |                         |    |    |   |   |
|          |                        |                      |         |         | 7.000  | 21.500 | 21.0057    | 21.5000 |                                             |                         |    |    |   |   |
| SGO_0803 | -2.851                 | 7.738                | 0.0002  | 0.0002  | 7.000  | 86.000 | 18.4240    | 89.5010 | hypothetical protein SGO_0803               |                         |    |    |   |   |
|          |                        |                      |         |         | 3.000  | 96.500 | 9.0024     | 96.5000 |                                             |                         |    |    |   |   |
| SGO_0814 | 0.226                  | 3.287                |         |         | 2.000  |        | 5.2640     |         | aminotransferase, class-V                   |                         |    |    |   |   |
|          |                        |                      |         |         |        | 4.500  |            | 4.5000  |                                             |                         |    |    |   |   |
| SGO_0815 | -0.667                 | 7.389                | 0.0012  | 0.0041  | 11.500 | 46.000 | 30.2680    | 47.8726 | thiI; thiamine biosynthesis protein ThiI    |                         |    |    |   |   |
|          |                        |                      |         |         | 11.500 | 55.000 | 34.5093    | 55.0000 |                                             |                         |    |    |   |   |

Show detected proteins only  
 Show all proteins  
 Filter by category:

Proteins found: 624

**Test**      **Cutoff**  
     

|                                                                    | Signif | Direction | Applies To   |
|--------------------------------------------------------------------|--------|-----------|--------------|
| <span style="background-color: red; color: black;"> </span>        | yes    | +         | ratios, bars |
| <span style="background-color: yellow; color: black;"> </span>     | no     | n/a       | bars         |
| <span style="background-color: green; color: black;"> </span>      | yes    | -         | ratios, bars |
| <span style="background-color: pink; color: black;"> </span>       | yes    | +         | p-, q-Values |
| <span style="background-color: lightgreen; color: black;"> </span> | yes    | -         | p-, q-Values |

Dot Plots  Dot Plots

Summary Table SgFn vs Sg SgPg vs Sg SgPgFn vs Sg SgPg vs SgFn SgPgFn vs SgFn SgPgFn vs SgPg Coverage

| Protein  | SgPgFn vs Sg           |                      |         |         | Raw     |         | Normalized |          | Description                                       | Log <sub>2</sub> Ratios |    |    |   |   |
|----------|------------------------|----------------------|---------|---------|---------|---------|------------|----------|---------------------------------------------------|-------------------------|----|----|---|---|
|          | Log <sub>2</sub> Ratio | Log <sub>2</sub> Sum | q-Value | p-Value | SgPgFn  | Sg      | SgPgFn     | Sg       |                                                   | -6                      | -4 | -2 | 0 | 2 |
| SGO_0818 | 2.156                  | 9.701                | 0.0004  | 0.0007  | 118.000 | 87.000  | 310.5762   | 90.5417  | rplU; ribosomal protein L21                       |                         |    |    |   |   |
|          |                        |                      |         |         | 122.500 | 63.500  | 367.5989   | 63.5000  |                                                   |                         |    |    |   |   |
| SGO_0820 | 0.074                  | 7.887                | 0.0933  | 0.8915  | 28.000  | 72.500  | 73.6960    | 75.4514  | rpmA; ribosomal protein L27                       |                         |    |    |   |   |
|          |                        |                      |         |         | 15.500  | 41.000  | 46.5125    | 41.0000  |                                                   |                         |    |    |   |   |
| SGO_0824 | 0.727                  | 7.433                | 0.0035  | 0.0168  | 19.500  | 25.000  | 51.3240    | 26.0177  | lepA; GTP-binding protein LepA                    |                         |    |    |   |   |
|          |                        |                      |         |         | 18.500  | 40.000  | 55.5149    | 40.0000  |                                                   |                         |    |    |   |   |
| SGO_0832 | -2.454                 | 6.497                | 0.0130  | 0.0915  |         | 44.500  |            | 46.3116  | hypothetical protein SGO_0832                     |                         |    |    |   |   |
|          |                        |                      |         |         | 2.500   | 36.500  | 7.5020     | 36.5000  |                                                   |                         |    |    |   |   |
| SGO_0835 | 1.176                  | 8.008                | 0.0025  | 0.0110  | 28.500  | 32.500  | 75.0120    | 33.8231  | nitroreductase                                    |                         |    |    |   |   |
|          |                        |                      |         |         | 34.500  | 45.000  | 103.5279   | 45.0000  |                                                   |                         |    |    |   |   |
| SGO_0836 | 0.471                  | 9.046                | 0.0053  | 0.0283  | 65.000  | 99.000  | 171.0801   | 103.0303 | pepV; dipeptidase PepV                            |                         |    |    |   |   |
|          |                        |                      |         |         | 45.500  | 118.000 | 136.5367   | 118.0000 |                                                   |                         |    |    |   |   |
| SGO_0842 | 0.388                  | 4.835                | 0.0615  | 0.5534  | 3.000   | 3.500   | 7.8960     | 3.6425   | rhodanese family protein                          |                         |    |    |   |   |
|          |                        |                      |         |         | 2.500   | 9.500   | 7.5020     | 9.5000   |                                                   |                         |    |    |   |   |
| SGO_0848 | 1.395                  | 8.511                | 0.0001  | 0.0001  | 52.000  | 48.500  | 136.8641   | 50.4744  | rpmE; ribosomal protein L31                       |                         |    |    |   |   |
|          |                        |                      |         |         | 42.500  | 50.000  | 127.5343   | 50.0000  |                                                   |                         |    |    |   |   |
| SGO_0850 | 2.383                  | 8.256                | 0.0063  | 0.0348  | 68.500  | 22.500  | 180.2921   | 23.4160  | flavodoxin                                        |                         |    |    |   |   |
|          |                        |                      |         |         | 26.500  | 22.500  | 79.5214    | 22.5000  |                                                   |                         |    |    |   |   |
| SGO_0854 | -5.415                 | 9.525                | 0.0001  | 0.0000  | 3.000   | 336.500 | 7.8960     | 350.1988 | cshA; surface-associated protein CshA             |                         |    |    |   |   |
|          |                        |                      |         |         | 3.000   | 369.500 | 9.0024     | 369.5000 |                                                   |                         |    |    |   |   |
| SGO_0856 | -2.301                 | 8.333                | 0.0001  | 0.0000  | 11.000  | 124.500 | 28.9520    | 129.5683 | ABC transporter, substrate binding protein        |                         |    |    |   |   |
|          |                        |                      |         |         | 8.500   | 138.500 | 25.5069    | 138.5000 |                                                   |                         |    |    |   |   |
| SGO_0859 | -0.807                 | 7.283                | 0.0037  | 0.0179  | 9.500   | 54.500  | 25.0040    | 56.7187  | pheS; phenylalanyl-tRNA synthetase, alpha subunit |                         |    |    |   |   |
|          |                        |                      |         |         | 10.500  | 42.500  | 31.5085    | 42.5000  |                                                   |                         |    |    |   |   |

- Show detected proteins only
- Show all proteins

Proteins found: 624

Filter by category:  
ABC Transporter

Test Cutoff

q-Value

.005

p-Value

| Signif | Direction | Applies To   |
|--------|-----------|--------------|
| yes    | +         | ratios, bars |
| no     | n/a       | bars         |
| yes    | -         | ratios, bars |
| yes    | +         | p-, q-Values |
| yes    | -         | p-, q-Values |

Dot Plots Dot Plots

Summary Table

SgFn vs Sg

SgPg vs Sg

SgPgFn vs Sg

SgPg vs SgFn

SgPgFn vs SgFn

SgPgFn vs SgPg

Coverage

| Protein  | SgPgFn vs Sg           |                      |         |         | Raw    |        | Normalized |          | Description                                      | Log <sub>2</sub> Ratios |    |    |   |   |
|----------|------------------------|----------------------|---------|---------|--------|--------|------------|----------|--------------------------------------------------|-------------------------|----|----|---|---|
|          | Log <sub>2</sub> Ratio | Log <sub>2</sub> Sum | q-Value | p-Value | SgPgFn | Sg     | SgPgFn     | Sg       |                                                  | -6                      | -4 | -2 | 0 | 2 |
| SGO_0861 | 0.727                  | 8.977                | 0.0010  | 0.0033  | 56.000 | 99.000 | 147.3921   | 103.0303 | pheT; phenylalanyl-tRNA synthetase, beta subunit |                         |    |    |   |   |
|          |                        |                      |         |         | 55.500 | 87.000 | 166.5448   | 87.0000  |                                                  |                         |    |    |   |   |
| SGO_0885 | -0.567                 | 5.403                | 0.0086  | 0.0525  | 3.000  | 10.000 | 7.8960     | 10.4071  | cobyrinic acid synthase                          |                         |    |    |   |   |
|          |                        |                      |         |         | 3.000  | 15.000 | 9.0024     | 15.0000  |                                                  |                         |    |    |   |   |
| SGO_0888 | -2.014                 | 5.369                | 0.0175  | 0.1316  |        | 20.500 |            | 21.3345  | hypothetical protein SGO_0888                    |                         |    |    |   |   |
|          |                        |                      |         |         | 1.500  | 15.500 | 4.5012     | 15.5000  |                                                  |                         |    |    |   |   |
| SGO_0889 | -0.844                 | 6.839                | 0.0020  | 0.0083  | 9.500  | 36.000 | 25.0040    | 37.4655  | glmM; phosphoglucosamine mutase                  |                         |    |    |   |   |
|          |                        |                      |         |         | 5.500  | 35.500 | 16.5044    | 35.5000  |                                                  |                         |    |    |   |   |
| SGO_0893 | 0.522                  | 7.678                | 0.0010  | 0.0033  | 23.000 | 44.000 | 60.5360    | 45.7912  | GTP-binding protein                              |                         |    |    |   |   |
|          |                        |                      |         |         | 20.000 | 38.500 | 60.0162    | 38.5000  |                                                  |                         |    |    |   |   |
| SGO_0901 | -0.769                 | 5.823                | 0.0046  | 0.0238  | 3.000  | 17.000 | 7.8960     | 17.6921  | DNA-directed DNA polymerase III                  |                         |    |    |   |   |
|          |                        |                      |         |         | 4.500  | 17.500 | 13.5036    | 17.5000  |                                                  |                         |    |    |   |   |
| SGO_0906 | 1.830                  | 6.859                | 0.0013  | 0.0047  | 14.500 | 10.500 | 38.1640    | 10.9275  | leuA; 2-isopropylmalate synthase                 |                         |    |    |   |   |
|          |                        |                      |         |         | 17.500 | 14.500 | 52.5141    | 14.5000  |                                                  |                         |    |    |   |   |
| SGO_0911 | 1.485                  | 7.903                | 0.0009  | 0.0027  | 29.500 | 29.000 | 77.6440    | 30.1806  | hypothetical protein SGO_0911                    |                         |    |    |   |   |
|          |                        |                      |         |         | 33.000 | 32.500 | 99.0267    | 32.5000  |                                                  |                         |    |    |   |   |
| SGO_0936 | 1.188                  | 3.105                | 0.0184  | 0.1408  |        | 2.500  |            | 2.6018   | phosphoenolpyruvate synthase, putative           |                         |    |    |   |   |
|          |                        |                      |         |         | 1.500  | 1.500  | 4.5012     | 1.5000   |                                                  |                         |    |    |   |   |
| SGO_0940 | -0.447                 | 4.331                | 0.0526  | 0.4634  | 2.000  | 9.000  | 5.2640     | 9.3664   | ppsA; phosphoenolpyruvate synthase               |                         |    |    |   |   |
|          |                        |                      |         |         |        | 5.500  |            | 5.5000   |                                                  |                         |    |    |   |   |
| SGO_0946 | -0.622                 | 6.632                | 0.0098  | 0.0625  | 5.500  | 30.000 | 14.4760    | 31.2213  | Deblocking aminopeptidase                        |                         |    |    |   |   |
|          |                        |                      |         |         | 8.500  | 28.000 | 25.5069    | 28.0000  |                                                  |                         |    |    |   |   |
| SGO_0949 | -0.757                 | 4.862                | 0.0284  | 0.2286  | 2.500  | 12.500 | 6.5800     | 13.0089  | deaD; DEAD RNA helicase                          |                         |    |    |   |   |
|          |                        |                      |         |         |        | 9.500  |            | 9.5000   |                                                  |                         |    |    |   |   |

- Show detected proteins only
- Show all proteins

Proteins found: 624

Filter by category:

ABC Transporter

Test

Cutoff

q-Value

.005

p-Value

|  | Signif | Direction | Applies To   |
|--|--------|-----------|--------------|
|  | yes    | +         | ratios, bars |
|  | no     | n/a       | bars         |
|  | yes    | -         | ratios, bars |
|  | yes    | +         | p-, q-Values |
|  | yes    | -         | p-, q-Values |

Dot Plots Dot Plots

Summary Table

SgFn vs Sg

SgPg vs Sg

SgPgFn vs Sg

SgPg vs SgFn

SgPgFn vs SgFn

SgPgFn vs SgPg

Coverage

| Protein  | SgPgFn vs Sg           |                      |         |         | Raw    |         | Normalized |          | Description                                            | Log <sub>2</sub> Ratios |    |    |   |   |
|----------|------------------------|----------------------|---------|---------|--------|---------|------------|----------|--------------------------------------------------------|-------------------------|----|----|---|---|
|          | Log <sub>2</sub> Ratio | Log <sub>2</sub> Sum | q-Value | p-Value | SgPgFn | Sg      | SgPgFn     | Sg       |                                                        | -6                      | -4 | -2 | 0 | 2 |
| SGO_0950 | -0.774                 | 3.834                |         |         | 2.000  |         | 5.2640     |          | oxidoreductase                                         |                         |    |    |   |   |
|          |                        |                      |         |         |        | 9.000   |            | 9.0000   |                                                        |                         |    |    |   |   |
| SGO_0951 | -0.083                 | 5.935                | 0.0662  | 0.6035  | 5.000  | 13.000  | 13.1600    | 13.5292  | udk; uridine kinase                                    |                         |    |    |   |   |
|          |                        |                      |         |         | 5.500  | 18.000  | 16.5044    | 18.0000  |                                                        |                         |    |    |   |   |
| SGO_0954 | 0.496                  | 6.475                | 0.0164  | 0.1211  | 7.500  | 18.000  | 19.7400    | 18.7328  | ATP-binding protein                                    |                         |    |    |   |   |
|          |                        |                      |         |         | 11.000 | 17.500  | 33.0089    | 17.5000  |                                                        |                         |    |    |   |   |
| SGO_0982 | -3.500                 | 8.201                | 0.0002  | 0.0002  | 4.500  | 121.500 | 11.8440    | 126.4462 | amino acid ABC transporter, amino acid-binding protein |                         |    |    |   |   |
|          |                        |                      |         |         | 4.000  | 144.000 | 12.0032    | 144.0000 |                                                        |                         |    |    |   |   |
| SGO_0987 | 0.420                  | 7.786                | 0.0008  | 0.0021  | 24.000 | 48.000  | 63.1680    | 49.9541  | metK; S-adenosylmethionine synthetase                  |                         |    |    |   |   |
|          |                        |                      |         |         | 21.000 | 44.500  | 63.0170    | 44.5000  |                                                        |                         |    |    |   |   |
| SGO_0995 | -0.740                 | 4.614                | 0.0526  | 0.4645  | 2.000  | 5.500   | 5.2640     | 5.7239   | metallo-beta-lactamase superfamily protein             |                         |    |    |   |   |
|          |                        |                      |         |         |        | 13.500  |            | 13.5000  |                                                        |                         |    |    |   |   |
| SGO_1001 | 0.748                  | 7.654                | 0.0066  | 0.0376  | 20.000 | 42.500  | 52.6400    | 44.2302  | apt; adenine phosphoribosyltransferase                 |                         |    |    |   |   |
|          |                        |                      |         |         | 24.500 | 31.000  | 73.5198    | 31.0000  |                                                        |                         |    |    |   |   |
| SGO_1005 | 0.682                  | 5.098                | 0.0013  | 0.0047  | 4.000  | 5.500   | 10.5280    | 5.7239   | Bcl-2 family protein                                   |                         |    |    |   |   |
|          |                        |                      |         |         | 3.500  | 7.500   | 10.5028    | 7.5000   |                                                        |                         |    |    |   |   |
| SGO_1009 | 1.149                  | 8.693                | 0.0021  | 0.0088  | 46.000 | 57.000  | 121.0721   | 59.3204  | rfbA-1; glucose-1-phosphate thymidyltransferase        |                         |    |    |   |   |
|          |                        |                      |         |         | 55.000 | 68.500  | 165.0444   | 68.5000  |                                                        |                         |    |    |   |   |
| SGO_1010 | 0.915                  | 7.403                | 0.0001  | 0.0001  | 21.500 | 28.000  | 56.5880    | 29.1399  | rmIC; dTDP-4-keto-6-deoxyglucose-3,5-epimerase         |                         |    |    |   |   |
|          |                        |                      |         |         | 18.000 | 29.500  | 54.0145    | 29.5000  |                                                        |                         |    |    |   |   |
| SGO_1011 | 0.641                  | 7.895                | 0.0064  | 0.0362  | 25.500 | 35.000  | 67.1160    | 36.4248  | rfbB-1; dTDP-glucose 4,6-dehydratase                   |                         |    |    |   |   |
|          |                        |                      |         |         | 25.500 | 58.000  | 76.5206    | 58.0000  |                                                        |                         |    |    |   |   |
| SGO_1012 | 0.585                  | 8.521                | 0.0002  | 0.0002  | 41.000 | 72.000  | 107.9121   | 74.9311  | galE-1; UDP-glucose 4-epimerase                        |                         |    |    |   |   |
|          |                        |                      |         |         | 37.500 | 72.000  | 112.5303   | 72.0000  |                                                        |                         |    |    |   |   |

- Show detected proteins only
- Show all proteins

Proteins found: 624

Filter by category:

ABC Transporter

Test

Cutoff

q-Value

.005

p-Value

|        | Signif | Direction | Applies To   |
|--------|--------|-----------|--------------|
| Yellow | yes    | +         | ratios, bars |
| Yellow | no     | n/a       | bars         |
| Green  | yes    | -         | ratios, bars |
| Green  | yes    | +         | p-, q-Values |
| Red    | yes    | -         | p-, q-Values |

Dot Plots Dot Plots

Summary Table

SgFn vs Sg

SgPg vs Sg

SgPgFn vs Sg

SgPg vs SgFn

SgPgFn vs SgFn

SgPgFn vs SgPg

Coverage

SgPgFn vs Sg

Raw

Normalized

Log<sub>2</sub> Ratios

| Protein  | SgPgFn vs Sg           |                      |         |         | Raw     |         |          |          | Normalized |    |        |    | Description | Log <sub>2</sub> Ratios |    |    |   |   |   |   |  |  |  |  |  |
|----------|------------------------|----------------------|---------|---------|---------|---------|----------|----------|------------|----|--------|----|-------------|-------------------------|----|----|---|---|---|---|--|--|--|--|--|
|          | Log <sub>2</sub> Ratio | Log <sub>2</sub> Sum | q-Value | p-Value | SgPgFn  | Sg      | SgPgFn   | Sg       | SgPgFn     | Sg | SgPgFn | Sg |             | -6                      | -4 | -2 | 0 | 2 | 4 | 6 |  |  |  |  |  |
| SGO_1013 | -1.144                 | 6.302                | 0.0175  | 0.1311  | 5.500   | 34.500  | 14.4760  | 35.9045  |            |    |        |    |             |                         |    |    |   |   |   |   |  |  |  |  |  |
|          |                        |                      |         |         |         |         |          |          |            |    |        |    |             |                         |    |    |   |   |   |   |  |  |  |  |  |
| SGO_1016 | -1.705                 | 5.652                | 0.0215  | 0.1691  | 2.500   | 17.000  | 6.5800   | 17.6921  |            |    |        |    |             |                         |    |    |   |   |   |   |  |  |  |  |  |
|          |                        |                      |         |         |         |         |          |          |            |    |        |    |             |                         |    |    |   |   |   |   |  |  |  |  |  |
| SGO_1019 | -3.361                 | 6.410                | 0.0023  | 0.0096  | 1.500   | 39.500  | 3.9480   | 41.1080  |            |    |        |    |             |                         |    |    |   |   |   |   |  |  |  |  |  |
|          |                        |                      |         |         |         |         |          |          |            |    |        |    |             |                         |    |    |   |   |   |   |  |  |  |  |  |
| SGO_1020 | 0.517                  | 7.544                | 0.0030  | 0.0137  | 23.000  | 37.500  | 60.5360  | 39.0266  |            |    |        |    |             |                         |    |    |   |   |   |   |  |  |  |  |  |
|          |                        |                      |         |         |         |         |          |          |            |    |        |    |             |                         |    |    |   |   |   |   |  |  |  |  |  |
| SGO_1025 | -0.576                 | 6.464                | 0.0131  | 0.0922  | 8.500   | 21.500  | 22.3720  | 22.3753  |            |    |        |    |             |                         |    |    |   |   |   |   |  |  |  |  |  |
|          |                        |                      |         |         |         |         |          |          |            |    |        |    |             |                         |    |    |   |   |   |   |  |  |  |  |  |
| SGO_1026 | -3.207                 | 7.890                | 0.0021  | 0.0088  | 4.000   | 77.000  | 10.5280  | 80.1346  |            |    |        |    |             |                         |    |    |   |   |   |   |  |  |  |  |  |
|          |                        |                      |         |         |         |         |          |          |            |    |        |    |             |                         |    |    |   |   |   |   |  |  |  |  |  |
| SGO_1031 | -0.973                 | 5.369                | 0.0025  | 0.0107  | 2.000   | 13.500  | 5.2640   | 14.0496  |            |    |        |    |             |                         |    |    |   |   |   |   |  |  |  |  |  |
|          |                        |                      |         |         |         |         |          |          |            |    |        |    |             |                         |    |    |   |   |   |   |  |  |  |  |  |
| SGO_1032 | -0.623                 | 5.422                | 0.0007  | 0.0018  | 3.000   | 12.000  | 7.8960   | 12.4885  |            |    |        |    |             |                         |    |    |   |   |   |   |  |  |  |  |  |
|          |                        |                      |         |         |         |         |          |          |            |    |        |    |             |                         |    |    |   |   |   |   |  |  |  |  |  |
| SGO_1033 | -0.863                 | 7.498                | 0.0208  | 0.1629  | 7.500   | 36.000  | 19.7400  | 37.4655  |            |    |        |    |             |                         |    |    |   |   |   |   |  |  |  |  |  |
|          |                        |                      |         |         |         |         |          |          |            |    |        |    |             |                         |    |    |   |   |   |   |  |  |  |  |  |
| SGO_1034 | 0.317                  | 9.575                | 0.0337  | 0.2807  | 108.000 | 158.000 | 284.2562 | 164.4321 |            |    |        |    |             |                         |    |    |   |   |   |   |  |  |  |  |  |
|          |                        |                      |         |         |         |         |          |          |            |    |        |    |             |                         |    |    |   |   |   |   |  |  |  |  |  |
| SGO_1035 | 0.599                  | 5.642                | 0.0130  | 0.0914  | 5.000   | 7.000   | 13.1600  | 7.2850   |            |    |        |    |             |                         |    |    |   |   |   |   |  |  |  |  |  |
|          |                        |                      |         |         |         |         |          |          |            |    |        |    |             |                         |    |    |   |   |   |   |  |  |  |  |  |
| SGO_1036 | -2.329                 | 6.684                | 0.0011  | 0.0035  | 3.000   | 34.500  | 7.8960   | 35.9045  |            |    |        |    |             |                         |    |    |   |   |   |   |  |  |  |  |  |
|          |                        |                      |         |         |         |         |          |          |            |    |        |    |             |                         |    |    |   |   |   |   |  |  |  |  |  |

- Show detected proteins only  
 Show all proteins

Proteins found:  
624

Filter by category:

ABC Transporter

Test

Cutoff

q-Value

.005

p-Value

|             | Signif | Direction | Applies To   |
|-------------|--------|-----------|--------------|
| Red         | yes    | +         | ratios, bars |
| Yellow      | no     | n/a       | bars         |
| Green       | yes    | -         | ratios, bars |
| Pink        | yes    | +         | p-, q-Values |
| Light Green | yes    | -         | p-, q-Values |

Dot Plots Dot Plots



Summary Table

SgFn vs Sg

SgPg vs Sg

SgPgFn vs Sg

SgPg vs SgFn

SgPgFn vs SgFn

SgPgFn vs SgPg

Coverage

SgPgFn vs Sg

Raw

Normalized

Log<sub>2</sub> Ratios

| Protein  | SgPgFn vs Sg           |                      |         |         | Raw    |        | Normalized |         | Description                                                                                                             | Log <sub>2</sub> Ratios |    |    |   |   |   |   |
|----------|------------------------|----------------------|---------|---------|--------|--------|------------|---------|-------------------------------------------------------------------------------------------------------------------------|-------------------------|----|----|---|---|---|---|
|          | Log <sub>2</sub> Ratio | Log <sub>2</sub> Sum | q-Value | p-Value | SgPgFn | Sg     | SgPgFn     | Sg      |                                                                                                                         | -6                      | -4 | -2 | 0 | 2 | 4 | 6 |
| SGO_1038 | 0.907                  | 5.145                | 0.0101  | 0.0649  | 3.500  | 4.000  | 9.2120     | 4.1628  | uvrB; excinuclease ABC, B subunit                                                                                       |                         |    |    |   |   |   |   |
|          |                        |                      |         |         | 4.500  | 8.500  | 13.5036    | 8.5000  |                                                                                                                         |                         |    |    |   |   |   |   |
| SGO_1047 | -0.691                 | 5.932                | 0.0115  | 0.0768  | 5.500  | 14.500 | 14.4760    | 15.0903 | hypothetical protein SGO_1047                                                                                           |                         |    |    |   |   |   |   |
|          |                        |                      |         |         | 3.000  | 22.500 | 9.0024     | 22.5000 |                                                                                                                         |                         |    |    |   |   |   |   |
| SGO_1049 | 1.047                  | 3.872                | 0.0552  | 0.4899  | 2.500  | 1.500  | 6.5800     | 1.5611  | tRNA pseudouridine synthase B                                                                                           |                         |    |    |   |   |   |   |
|          |                        |                      |         |         |        | 6.500  |            | 6.5000  |                                                                                                                         |                         |    |    |   |   |   |   |
| SGO_1050 | 1.263                  | 3.088                |         |         |        |        |            |         | ribF; riboflavin biosynthesis protein RibF                                                                              |                         |    |    |   |   |   |   |
|          |                        |                      |         |         | 2.000  | 2.500  | 6.0016     | 2.5000  |                                                                                                                         |                         |    |    |   |   |   |   |
| SGO_1058 | -0.384                 | 6.571                | 0.0169  | 0.1253  | 10.000 | 31.500 | 26.3200    | 32.7824 | pstB; Phosphate import ATP-binding protein<br>pstB 2 (Phosphate-transporting ATPase 2)<br>(ABC phosphate transporter 2) |                         |    |    |   |   |   |   |
|          |                        |                      |         |         |        | 36.000 |            | 36.0000 |                                                                                                                         |                         |    |    |   |   |   |   |
| SGO_1059 | 0.849                  | 7.054                | 0.0001  | 0.0000  | 16.500 | 23.000 | 43.4280    | 23.9363 | pstB; Phosphate import ATP-binding protein<br>pstB 1 (Phosphate-transporting ATPase 1)<br>(ABC phosphate transporter 1) |                         |    |    |   |   |   |   |
|          |                        |                      |         |         | 14.000 | 23.500 | 42.0113    | 23.5000 |                                                                                                                         |                         |    |    |   |   |   |   |
| SGO_1060 | -1.276                 | 7.399                | 0.0007  | 0.0018  | 9.000  | 52.000 | 23.6880    | 54.1169 | phosphate transport system regulatory<br>protein                                                                        |                         |    |    |   |   |   |   |
|          |                        |                      |         |         | 8.500  | 65.500 | 25.5069    | 65.5000 |                                                                                                                         |                         |    |    |   |   |   |   |
| SGO_1065 | -0.993                 | 6.465                | 0.0004  | 0.0009  | 5.000  | 29.000 | 13.1600    | 30.1806 | hypothetical protein SGO_1065                                                                                           |                         |    |    |   |   |   |   |
|          |                        |                      |         |         | 5.500  | 28.500 | 16.5044    | 28.5000 |                                                                                                                         |                         |    |    |   |   |   |   |
| SGO_1069 | 0.331                  | 8.508                | 0.0047  | 0.0248  | 36.500 | 84.000 | 96.0681    | 87.4196 | membrane alanyl aminopeptidase                                                                                          |                         |    |    |   |   |   |   |
|          |                        |                      |         |         | 35.500 | 74.000 | 106.5287   | 74.0000 |                                                                                                                         |                         |    |    |   |   |   |   |
| SGO_1079 | -0.826                 | 6.789                | 0.0056  | 0.0302  | 7.000  | 27.500 | 18.4240    | 28.6195 | pdp; pyrimidine-nucleoside phosphorylase                                                                                |                         |    |    |   |   |   |   |
|          |                        |                      |         |         | 7.000  | 42.500 | 21.0057    | 42.5000 |                                                                                                                         |                         |    |    |   |   |   |   |
| SGO_1080 | -0.127                 | 8.229                | 0.0176  | 0.1329  | 26.500 | 80.500 | 69.7480    | 83.7771 | deoC; deoxyribose-phosphate aldolase                                                                                    |                         |    |    |   |   |   |   |
|          |                        |                      |         |         | 24.500 | 73.000 | 73.5198    | 73.0000 |                                                                                                                         |                         |    |    |   |   |   |   |
| SGO_1081 | 0.464                  | 4.360                | 0.0716  | 0.6617  | 3.000  | 3.500  | 7.8960     | 3.6425  | cdd; cytidine deaminase                                                                                                 |                         |    |    |   |   |   |   |
|          |                        |                      |         |         |        | 9.000  |            | 9.0000  |                                                                                                                         |                         |    |    |   |   |   |   |

 Show detected proteins only Show all proteins

Proteins found:

624

 Filter by category:

ABC Transporter

Test

Cutoff

q-Value

.005

p-Value

|             | Signif | Direction | Applies To   |
|-------------|--------|-----------|--------------|
| Red         | yes    | +         | ratios, bars |
| Yellow      | no     | n/a       | bars         |
| Green       | yes    | -         | ratios, bars |
| Pink        | yes    | +         | p-, q-Values |
| Light Green | yes    | -         | p-, q-Values |

Dot Plots Dot Plots

Summary Table

SgFn vs Sg

SgPg vs Sg

SgPgFn vs Sg

SgPg vs SgFn

SgPgFn vs SgFn

SgPgFn vs SgPg

Coverage

SgPgFn vs Sg

Raw

Normalized

Log<sub>2</sub> Ratios

| Protein  | SgPgFn vs Sg           |                      |         |         | Raw     |          |           |           | Normalized                                           |    |        |    | Description | Log <sub>2</sub> Ratios |    |    |    |    |   |   |   |   |  |
|----------|------------------------|----------------------|---------|---------|---------|----------|-----------|-----------|------------------------------------------------------|----|--------|----|-------------|-------------------------|----|----|----|----|---|---|---|---|--|
|          | Log <sub>2</sub> Ratio | Log <sub>2</sub> Sum | q-Value | p-Value | SgPgFn  | Sg       | SgPgFn    | Sg        | SgPgFn                                               | Sg | SgPgFn | Sg |             | SgPgFn                  | Sg | -6 | -4 | -2 | 0 | 2 | 4 | 6 |  |
| SGO_1082 | -1.016                 | 13.028               | 0.0024  | 0.0103  | 690.500 | 2606.500 | 1817.3970 | 2712.6096 |                                                      |    |        |    |             |                         |    |    |    |    |   |   |   |   |  |
|          |                        |                      |         |         | 340.500 | 2801.500 | 1021.7750 | 2801.5000 | lipoprotein                                          |    |        |    |             |                         |    |    |    |    |   |   |   |   |  |
| SGO_1088 | 0.367                  | 3.396                | 0.0737  | 0.6830  | 1.500   | 2.000    | 3.9480    | 2.0814    |                                                      |    |        |    |             |                         |    |    |    |    |   |   |   |   |  |
|          |                        |                      |         |         |         | 4.500    |           | 4.5000    | transcription regulator, LysR family                 |    |        |    |             |                         |    |    |    |    |   |   |   |   |  |
| SGO_1096 | 2.511                  | 9.539                | 0.0010  | 0.0031  | 140.000 | 49.500   | 368.4802  | 51.5151   |                                                      |    |        |    |             |                         |    |    |    |    |   |   |   |   |  |
|          |                        |                      |         |         | 88.500  | 58.500   | 265.5715  | 58.5000   | butA; acetoin dehydrogenase                          |    |        |    |             |                         |    |    |    |    |   |   |   |   |  |
| SGO_1098 | 1.476                  | 4.525                | 0.0115  | 0.0771  | 4.000   |          | 10.5280   |           |                                                      |    |        |    |             |                         |    |    |    |    |   |   |   |   |  |
|          |                        |                      |         |         | 3.000   | 3.500    | 9.0024    | 3.5000    | proA; gamma-glutamyl phosphate reductase             |    |        |    |             |                         |    |    |    |    |   |   |   |   |  |
| SGO_1104 | 0.289                  | 4.965                | 0.0092  | 0.0571  | 4.500   | 9.500    | 11.8440   | 9.8867    |                                                      |    |        |    |             |                         |    |    |    |    |   |   |   |   |  |
|          |                        |                      |         |         |         | 9.500    |           | 9.5000    | carB; carbamoyl-phosphate synthase, large subunit    |    |        |    |             |                         |    |    |    |    |   |   |   |   |  |
| SGO_1107 | -1.162                 | 5.074                | 0.0311  | 0.2563  |         | 16.500   |           | 17.1717   |                                                      |    |        |    |             |                         |    |    |    |    |   |   |   |   |  |
|          |                        |                      |         |         | 2.000   | 10.500   | 6.0016    | 10.5000   | PyrR bifunctional protein                            |    |        |    |             |                         |    |    |    |    |   |   |   |   |  |
| SGO_1109 | -0.527                 | 7.996                | 0.0029  | 0.0129  | 21.500  | 66.500   | 56.5880   | 69.2072   |                                                      |    |        |    |             |                         |    |    |    |    |   |   |   |   |  |
|          |                        |                      |         |         | 16.000  | 81.500   | 48.0129   | 81.5000   | pyrB; aspartate carbamoyltransferase                 |    |        |    |             |                         |    |    |    |    |   |   |   |   |  |
| SGO_1111 | -3.352                 | 6.828                | 0.0127  | 0.0882  | 2.000   | 45.500   | 5.2640    | 47.3523   |                                                      |    |        |    |             |                         |    |    |    |    |   |   |   |   |  |
|          |                        |                      |         |         |         | 61.000   |           | 61.0000   | fruR; phosphotransferase system repressor            |    |        |    |             |                         |    |    |    |    |   |   |   |   |  |
| SGO_1112 | -3.355                 | 7.010                | 0.0028  | 0.0123  |         | 58.000   |           | 60.3612   |                                                      |    |        |    |             |                         |    |    |    |    |   |   |   |   |  |
|          |                        |                      |         |         | 2.000   | 62.500   | 6.0016    | 62.5000   | fruB; 1-phosphofructokinase                          |    |        |    |             |                         |    |    |    |    |   |   |   |   |  |
| SGO_1113 | -3.884                 | 11.211               | 0.0000  | 0.0000  | 26.000  | 1053.000 | 68.4320   | 1095.8672 |                                                      |    |        |    |             |                         |    |    |    |    |   |   |   |   |  |
|          |                        |                      |         |         | 27.500  | 1124.000 | 82.5222   | 1124.0000 | fruA; PTS system, fructose specific IIABC components |    |        |    |             |                         |    |    |    |    |   |   |   |   |  |
| SGO_1114 | -2.238                 | 6.815                | 0.0001  | 0.0001  | 3.500   | 46.500   | 9.2120    | 48.3930   |                                                      |    |        |    |             |                         |    |    |    |    |   |   |   |   |  |
|          |                        |                      |         |         | 3.500   | 44.500   | 10.5028   | 44.5000   | Protein of unknown function (DUF1149) superfamily    |    |        |    |             |                         |    |    |    |    |   |   |   |   |  |
| SGO_1116 | 2.399                  | 6.582                | 0.0006  | 0.0013  | 13.500  | 6.500    | 35.5320   | 6.7646    |                                                      |    |        |    |             |                         |    |    |    |    |   |   |   |   |  |
|          |                        |                      |         |         | 15.000  | 8.500    | 45.0121   | 8.5000    | dapB; dihydrodipicolinate reductase                  |    |        |    |             |                         |    |    |    |    |   |   |   |   |  |

- Show detected proteins only  
 Show all proteins

Proteins found:  
624

Filter by category:

ABC Transporter

Test

Cutoff

q-Value

p-Value

.005

|             | Signif | Direction | Applies To   |
|-------------|--------|-----------|--------------|
| Red         | yes    | +         | ratios, bars |
| Yellow      | no     | n/a       | bars         |
| Green       | yes    | -         | ratios, bars |
| Pink        | yes    | +         | p-, q-Values |
| Light Green | yes    | -         | p-, q-Values |

Dot Plots Dot Plots

Summary Table

SgFn vs Sg

SgPg vs Sg

SgPgFn vs Sg

SgPg vs SgFn

SgPgFn vs SgFn

SgPgFn vs SgPg

Coverage

SgPgFn vs Sg

Raw

Normalized

Log<sub>2</sub> Ratios

| Protein  | SgPgFn vs Sg           |                      |         |         | Raw    |         |          |          | Normalized |    |        |    | Description | Log <sub>2</sub> Ratios |    |    |   |   |   |   |
|----------|------------------------|----------------------|---------|---------|--------|---------|----------|----------|------------|----|--------|----|-------------|-------------------------|----|----|---|---|---|---|
|          | Log <sub>2</sub> Ratio | Log <sub>2</sub> Sum | q-Value | p-Value | SgPgFn | Sg      | SgPgFn   | Sg       | SgPgFn     | Sg | SgPgFn | Sg |             | -6                      | -4 | -2 | 0 | 2 | 4 | 6 |
| SGO_1120 | 0.698                  | 8.203                | 0.0049  | 0.0263  | 29.500 | 48.000  | 77.6440  | 49.9541  |            |    |        |    |             |                         |    |    |   |   |   |   |
|          |                        |                      |         |         | 35.000 | 62.000  | 105.0283 | 62.0000  |            |    |        |    |             |                         |    |    |   |   |   |   |
| SGO_1123 | 1.001                  | 7.805                | 0.0004  | 0.0010  | 26.500 | 35.000  | 69.7480  | 36.4248  |            |    |        |    |             |                         |    |    |   |   |   |   |
|          |                        |                      |         |         | 26.500 | 38.000  | 79.5214  | 38.0000  |            |    |        |    |             |                         |    |    |   |   |   |   |
| SGO_1129 | -0.672                 | 6.501                | 0.0006  | 0.0016  | 7.000  | 28.000  | 18.4240  | 29.1399  |            |    |        |    |             |                         |    |    |   |   |   |   |
|          |                        |                      |         |         | 5.500  | 26.500  | 16.5044  | 26.5000  |            |    |        |    |             |                         |    |    |   |   |   |   |
| SGO_1130 | -0.959                 | 8.402                | 0.0001  | 0.0000  | 22.000 | 109.000 | 57.9040  | 113.4373 |            |    |        |    |             |                         |    |    |   |   |   |   |
|          |                        |                      |         |         | 19.000 | 110.000 | 57.0153  | 110.0000 |            |    |        |    |             |                         |    |    |   |   |   |   |
| SGO_1131 | -0.836                 | 6.722                | 0.0014  | 0.0050  | 6.000  | 32.000  | 15.7920  | 33.3027  |            |    |        |    |             |                         |    |    |   |   |   |   |
|          |                        |                      |         |         | 7.500  | 34.000  | 22.5061  | 34.0000  |            |    |        |    |             |                         |    |    |   |   |   |   |
| SGO_1132 | -1.908                 | 5.520                | 0.0242  | 0.1926  | 2.000  | 15.000  | 5.2640   | 15.6106  |            |    |        |    |             |                         |    |    |   |   |   |   |
|          |                        |                      |         |         |        | 25.000  |          | 25.0000  |            |    |        |    |             |                         |    |    |   |   |   |   |
| SGO_1133 | -1.214                 | 6.539                | 0.0027  | 0.0117  | 4.000  | 35.000  | 10.5280  | 36.4248  |            |    |        |    |             |                         |    |    |   |   |   |   |
|          |                        |                      |         |         | 6.000  | 28.000  | 18.0048  | 28.0000  |            |    |        |    |             |                         |    |    |   |   |   |   |
| SGO_1134 | 0.121                  | 4.103                | 0.0782  | 0.7301  |        | 4.500   |          | 4.6832   |            |    |        |    |             |                         |    |    |   |   |   |   |
|          |                        |                      |         |         | 2.000  | 6.500   | 6.0016   | 6.5000   |            |    |        |    |             |                         |    |    |   |   |   |   |
| SGO_1139 | 0.580                  | 6.523                | 0.0034  | 0.0164  | 10.000 | 15.000  | 26.3200  | 15.6106  |            |    |        |    |             |                         |    |    |   |   |   |   |
|          |                        |                      |         |         | 9.500  | 21.500  | 28.5077  | 21.5000  |            |    |        |    |             |                         |    |    |   |   |   |   |
| SGO_1140 | -0.066                 | 8.332                | 0.0435  | 0.3780  | 29.500 | 85.500  | 77.6440  | 88.9807  |            |    |        |    |             |                         |    |    |   |   |   |   |
|          |                        |                      |         |         | 26.500 | 76.000  | 79.5214  | 76.0000  |            |    |        |    |             |                         |    |    |   |   |   |   |
| SGO_1141 | 0.201                  | 4.191                | 0.0695  | 0.6387  | 2.500  | 4.500   | 6.5800   | 4.6832   |            |    |        |    |             |                         |    |    |   |   |   |   |
|          |                        |                      |         |         |        | 7.000   |          | 7.0000   |            |    |        |    |             |                         |    |    |   |   |   |   |
| SGO_1143 | 0.799                  | 4.852                | 0.0299  | 0.2442  | 5.000  | 5.500   | 13.1600  | 5.7239   |            |    |        |    |             |                         |    |    |   |   |   |   |
|          |                        |                      |         |         |        | 10.000  |          | 10.0000  |            |    |        |    |             |                         |    |    |   |   |   |   |

- Show detected proteins only  
 Show all proteins

Proteins found:  
624

Filter by category:

ABC Transporter

Test

Cutoff

q-Value

.005

p-Value

|             | Signif | Direction | Applies To   |
|-------------|--------|-----------|--------------|
| Red         | yes    | +         | ratios, bars |
| Yellow      | no     | n/a       | bars         |
| Green       | yes    | -         | ratios, bars |
| Pink        | yes    | +         | p-, q-Values |
| Light Green | yes    | -         | p-, q-Values |

Dot Plots Dot Plots

Summary Table SgFn vs Sg SgPg vs Sg SgPgFn vs Sg SgPg vs SgFn SgPgFn vs SgFn SgPgFn vs SgPg Coverage

| Protein  | SgPgFn vs Sg           |                      |         |         | Raw     |         | Normalized |          | Description                           | Log <sub>2</sub> Ratios |    |    |   |   |   |   |
|----------|------------------------|----------------------|---------|---------|---------|---------|------------|----------|---------------------------------------|-------------------------|----|----|---|---|---|---|
|          | Log <sub>2</sub> Ratio | Log <sub>2</sub> Sum | q-Value | p-Value | SgPgFn  | Sg      | SgPgFn     | Sg       |                                       | -6                      | -4 | -2 | 0 | 2 | 4 | 6 |
| SGO_1144 | 1.707                  | 9.282                | 0.0004  | 0.0009  | 98.500  | 66.500  | 259.2521   | 69.2072  | glcK; glucokinase                     |                         |    |    |   |   |   |   |
|          |                        |                      |         |         | 72.500  | 76.500  | 217.5586   | 76.5000  |                                       |                         |    |    |   |   |   |   |
| SGO_1150 | 0.585                  | 4.130                |         |         |         |         |            |          | hypothetical protein SGO_1150         |                         |    |    |   |   |   |   |
|          |                        |                      |         |         | 3.500   | 7.000   | 10.5028    | 7.0000   |                                       |                         |    |    |   |   |   |   |
| SGO_1151 | 1.614                  | 9.238                | 0.0001  | 0.0000  | 84.000  | 68.500  | 221.0881   | 71.2886  | glyA; serine hydroxymethyltransferase |                         |    |    |   |   |   |   |
|          |                        |                      |         |         | 78.000  | 77.500  | 234.0630   | 77.5000  |                                       |                         |    |    |   |   |   |   |
| SGO_1154 | 0.523                  | 7.625                | 0.0085  | 0.0520  | 20.500  | 47.500  | 53.9560    | 49.4337  | prfA; peptide chain release factor 1  |                         |    |    |   |   |   |   |
|          |                        |                      |         |         | 20.500  | 32.500  | 61.5166    | 32.5000  |                                       |                         |    |    |   |   |   |   |
| SGO_1155 | 0.196                  | 5.567                | 0.0922  | 0.8799  |         | 9.500   |            | 9.8867   | tdk; thymidine kinase                 |                         |    |    |   |   |   |   |
|          |                        |                      |         |         | 5.500   | 21.000  | 16.5044    | 21.0000  |                                       |                         |    |    |   |   |   |   |
| SGO_1167 | -0.299                 | 7.772                | 0.0371  | 0.3123  | 14.000  | 54.000  | 36.8480    | 56.1983  | nox; NADH oxidase                     |                         |    |    |   |   |   |   |
|          |                        |                      |         |         | 21.000  | 62.500  | 63.0170    | 62.5000  |                                       |                         |    |    |   |   |   |   |
| SGO_1169 | 0.557                  | 7.504                | 0.0004  | 0.0009  | 20.500  | 37.500  | 53.9560    | 39.0266  | NADPH-dependent FMN reductase         |                         |    |    |   |   |   |   |
|          |                        |                      |         |         | 18.000  | 34.500  | 54.0145    | 34.5000  |                                       |                         |    |    |   |   |   |   |
| SGO_1170 | -0.745                 | 8.696                | 0.0002  | 0.0002  | 31.000  | 125.500 | 81.5920    | 130.6091 | NADPH-dependent FMN reductase         |                         |    |    |   |   |   |   |
|          |                        |                      |         |         | 24.500  | 129.000 | 73.5198    | 129.0000 |                                       |                         |    |    |   |   |   |   |
| SGO_1185 | 0.351                  | 4.801                | 0.0232  | 0.1848  | 2.500   | 7.000   | 6.5800     | 7.2850   | acetyltransferase, GNAT family        |                         |    |    |   |   |   |   |
|          |                        |                      |         |         | 3.000   | 5.000   | 9.0024     | 5.0000   |                                       |                         |    |    |   |   |   |   |
| SGO_1189 | -3.464                 | 9.278                | 0.0003  | 0.0004  | 15.000  | 292.500 | 39.4800    | 304.4076 | lipoprotein, putative                 |                         |    |    |   |   |   |   |
|          |                        |                      |         |         | 5.500   | 260.500 | 16.5044    | 260.5000 |                                       |                         |    |    |   |   |   |   |
| SGO_1191 | 0.717                  | 11.990               | 0.0008  | 0.0022  | 454.000 | 789.500 | 1194.9287  | 821.6402 | rplL; ribosomal protein L7/L12        |                         |    |    |   |   |   |   |
|          |                        |                      |         |         | 444.500 | 718.000 | 1333.8590  | 718.0000 |                                       |                         |    |    |   |   |   |   |
| SGO_1192 | -0.130                 | 9.230                | 0.0106  | 0.0690  | 56.500  | 144.500 | 148.7081   | 150.3825 | BL5; 50S ribosomal protein L10        |                         |    |    |   |   |   |   |
|          |                        |                      |         |         | 46.000  | 163.500 | 138.0372   | 163.5000 |                                       |                         |    |    |   |   |   |   |

Show detected proteins only  
 Show all proteins  
 Filter by category:

Proteins found: 624

**Test**      **Cutoff**  
     

|             | Signif | Direction | Applies To   |
|-------------|--------|-----------|--------------|
| Red         | yes    | +         | ratios, bars |
| Yellow      | no     | n/a       | bars         |
| Green       | yes    | -         | ratios, bars |
| Pink        | yes    | +         | p-, q-Values |
| Light Green | yes    | -         | p-, q-Values |

Summary Table

SgFn vs Sg

SgPg vs Sg

SgPgFn vs Sg

SgPg vs SgFn

SgPgFn vs SgFn

SgPgFn vs SgPg

Coverage

SgPgFn vs Sg

Raw

Normalized

Log<sub>2</sub> Ratios

| Protein  | SgPgFn vs Sg           |                      |         |         | Raw    |         | Normalized |          | Description                                           | Log <sub>2</sub> Ratios |    |    |   |   |
|----------|------------------------|----------------------|---------|---------|--------|---------|------------|----------|-------------------------------------------------------|-------------------------|----|----|---|---|
|          | Log <sub>2</sub> Ratio | Log <sub>2</sub> Sum | q-Value | p-Value | SgPgFn | Sg      | SgPgFn     | Sg       |                                                       | -6                      | -4 | -2 | 0 | 2 |
| SGO_1193 | -0.784                 | 5.522                | 0.0004  | 0.0007  | 3.000  | 13.500  | 7.8960     | 14.0496  | gid; Glucose inhibited division protein A             |                         |    |    |   |   |
|          |                        |                      |         |         | 3.000  | 15.000  | 9.0024     | 15.0000  |                                                       |                         |    |    |   |   |
| SGO_1196 | 1.358                  | 4.061                |         |         |        | 4.500   |            | 4.6832   | satD; SatD-like protein                               |                         |    |    |   |   |
|          |                        |                      |         |         | 4.000  |         | 12.0032    |          |                                                       |                         |    |    |   |   |
| SGO_1197 | -1.756                 | 7.913                | 0.0006  | 0.0017  | 10.000 | 79.500  | 26.3200    | 82.7364  | topA; DNA topoisomerase I                             |                         |    |    |   |   |
|          |                        |                      |         |         | 9.500  | 103.500 | 28.5077    | 103.5000 |                                                       |                         |    |    |   |   |
| SGO_1198 | -0.145                 | 8.938                | 0.0296  | 0.2408  | 48.000 | 134.000 | 126.3361   | 139.4551 | DNA processing Smf protein                            |                         |    |    |   |   |
|          |                        |                      |         |         | 35.500 | 118.000 | 106.5287   | 118.0000 |                                                       |                         |    |    |   |   |
| SGO_1203 | 0.435                  | 6.426                | 0.0071  | 0.0404  | 8.500  | 15.500  | 22.3720    | 16.1310  | anaerobic ribonucleotide reductase                    |                         |    |    |   |   |
|          |                        |                      |         |         | 9.000  | 20.500  | 27.0073    | 20.5000  |                                                       |                         |    |    |   |   |
| SGO_1205 | 0.719                  | 4.781                | 0.0129  | 0.0899  | 3.500  | 7.000   | 9.2120     | 7.2850   | dapA; dihydrodipicolinate synthase                    |                         |    |    |   |   |
|          |                        |                      |         |         | 2.500  | 3.500   | 7.5020     | 3.5000   |                                                       |                         |    |    |   |   |
| SGO_1206 | 0.164                  | 7.642                | 0.0130  | 0.0915  | 19.000 | 42.500  | 50.0080    | 44.2302  | asd; aspartate-semialdehyde dehydrogenase             |                         |    |    |   |   |
|          |                        |                      |         |         | 18.500 | 50.000  | 55.5149    | 50.0000  |                                                       |                         |    |    |   |   |
| SGO_1210 | -0.802                 | 4.885                | 0.0098  | 0.0626  | 2.500  | 11.500  | 6.5800     | 11.9682  | fhs-1; formate--tetrahydrofolate ligase               |                         |    |    |   |   |
|          |                        |                      |         |         |        | 11.000  |            | 11.0000  |                                                       |                         |    |    |   |   |
| SGO_1215 | 0.239                  | 9.813                | 0.0014  | 0.0051  | 92.500 | 190.000 | 243.4601   | 197.7348 | manB; phosphomannomutase                              |                         |    |    |   |   |
|          |                        |                      |         |         | 81.000 | 215.000 | 243.0654   | 215.0000 |                                                       |                         |    |    |   |   |
| SGO_1216 | 1.150                  | 6.754                | 0.0004  | 0.0009  | 14.500 | 18.500  | 38.1640    | 19.2531  | bta; Possible bacteriocin transport accessory protein |                         |    |    |   |   |
|          |                        |                      |         |         | 12.000 | 14.500  | 36.0097    | 14.5000  |                                                       |                         |    |    |   |   |
| SGO_1219 | -0.058                 | 7.613                | 0.0681  | 0.6240  | 16.500 | 44.000  | 43.4280    | 45.7912  | pta; phosphate acetyltransferase                      |                         |    |    |   |   |
|          |                        |                      |         |         | 17.500 | 54.000  | 52.5141    | 54.0000  |                                                       |                         |    |    |   |   |
| SGO_1224 | 0.425                  | 8.740                | 0.0033  | 0.0157  | 42.500 | 89.500  | 111.8601   | 93.1435  | Ribose-phosphate pyrophosphokinase 2                  |                         |    |    |   |   |
|          |                        |                      |         |         | 44.500 | 89.000  | 133.5359   | 89.0000  |                                                       |                         |    |    |   |   |

- Show detected proteins only  
 Show all proteins

Proteins found:  
624

Filter by category:

ABC Transporter

Test

Cutoff

q-Value

.005

p-Value

|             | Signif | Direction | Applies To   |
|-------------|--------|-----------|--------------|
| Red         | yes    | +         | ratios, bars |
| Yellow      | no     | n/a       | bars         |
| Green       | yes    | -         | ratios, bars |
| Pink        | yes    | +         | p-, q-Values |
| Light Green | yes    | -         | p-, q-Values |

Dot Plots Dot Plots

Summary Table

SgFn vs Sg

SgPg vs Sg

SgPgFn vs Sg

SgPg vs SgFn

SgPgFn vs SgFn

SgPgFn vs SgPg

Coverage

SgPgFn vs Sg

Raw

Normalized

Log<sub>2</sub> Ratios

| Protein  | SgPgFn vs Sg           |                      |         |         | Raw     |         |          |          | Normalized                                       |    |        |    | Description | Log <sub>2</sub> Ratios |    |    |    |    |   |   |
|----------|------------------------|----------------------|---------|---------|---------|---------|----------|----------|--------------------------------------------------|----|--------|----|-------------|-------------------------|----|----|----|----|---|---|
|          | Log <sub>2</sub> Ratio | Log <sub>2</sub> Sum | q-Value | p-Value | SgPgFn  | Sg      | SgPgFn   | Sg       | SgPgFn                                           | Sg | SgPgFn | Sg |             | SgPgFn                  | Sg | -6 | -4 | -2 | 0 | 2 |
| SGO_1225 | 0.465                  | 5.279                | 0.0018  | 0.0070  | 4.000   | 7.500   | 10.5280  | 7.8053   | pyridoxal-phosphate dependent aminotransferase   |    |        |    |             |                         |    |    |    |    |   |   |
|          |                        |                      |         |         | 4.000   | 8.500   | 12.0032  | 8.5000   |                                                  |    |        |    |             |                         |    |    |    |    |   |   |
| SGO_1226 | 0.231                  | 6.360                | 0.0532  | 0.4709  | 8.000   | 13.500  | 21.0560  | 14.0496  | hypothetical protein SGO_1226                    |    |        |    |             |                         |    |    |    |    |   |   |
|          |                        |                      |         |         | 7.500   | 24.500  | 22.5061  | 24.5000  |                                                  |    |        |    |             |                         |    |    |    |    |   |   |
| SGO_1231 | -1.868                 | 8.032                | 0.0004  | 0.0008  | 10.500  | 90.000  | 27.6360  | 93.6639  | gyrA; DNA gyrase, A subunit                      |    |        |    |             |                         |    |    |    |    |   |   |
|          |                        |                      |         |         | 9.500   | 112.000 | 28.5077  | 112.0000 |                                                  |    |        |    |             |                         |    |    |    |    |   |   |
| SGO_1232 | 3.026                  | 10.443               | 0.0000  | 0.0000  | 234.000 | 65.000  | 615.8884 | 67.6461  | L-lactate dehydrogenase                          |    |        |    |             |                         |    |    |    |    |   |   |
|          |                        |                      |         |         | 207.500 | 85.500  | 622.6676 | 85.5000  |                                                  |    |        |    |             |                         |    |    |    |    |   |   |
| SGO_1234 | 0.581                  | 10.993               | 0.0008  | 0.0023  | 228.500 | 359.500 | 601.4123 | 374.1351 | rpsA; 30S ribosomal protein S1                   |    |        |    |             |                         |    |    |    |    |   |   |
|          |                        |                      |         |         | 206.000 | 444.000 | 618.1664 | 444.0000 |                                                  |    |        |    |             |                         |    |    |    |    |   |   |
| SGO_1237 | 0.822                  | 6.561                | 0.0153  | 0.1106  | 7.500   | 17.000  | 19.7400  | 17.6921  | hypothetical protein SGO_1237                    |    |        |    |             |                         |    |    |    |    |   |   |
|          |                        |                      |         |         | 14.000  | 15.000  | 42.0113  | 15.0000  |                                                  |    |        |    |             |                         |    |    |    |    |   |   |
| SGO_1238 | -0.322                 | 6.950                | 0.0122  | 0.0839  | 9.000   | 35.000  | 23.6880  | 36.4248  | ilvE; branched-chain amino acid aminotransferase |    |        |    |             |                         |    |    |    |    |   |   |
|          |                        |                      |         |         | 10.500  | 32.000  | 31.5085  | 32.0000  |                                                  |    |        |    |             |                         |    |    |    |    |   |   |
| SGO_1239 | -2.990                 | 6.446                | 0.0001  | 0.0001  | 2.000   | 35.500  | 5.2640   | 36.9452  | parC; DNA topoisomerase IV, A subunit            |    |        |    |             |                         |    |    |    |    |   |   |
|          |                        |                      |         |         | 1.500   | 40.500  | 4.5012   | 40.5000  |                                                  |    |        |    |             |                         |    |    |    |    |   |   |
| SGO_1242 | -2.541                 | 7.232                | 0.0106  | 0.0688  | 4.500   | 72.500  | 11.8440  | 75.4514  | lipoprotein, putative                            |    |        |    |             |                         |    |    |    |    |   |   |
|          |                        |                      |         |         |         | 63.000  |          | 63.0000  |                                                  |    |        |    |             |                         |    |    |    |    |   |   |
| SGO_1248 | -0.668                 | 5.583                | 0.0094  | 0.0593  | 3.500   | 17.500  | 9.2120   | 18.2124  | pyrC; dihydroorotase                             |    |        |    |             |                         |    |    |    |    |   |   |
|          |                        |                      |         |         | 3.000   | 11.500  | 9.0024   | 11.5000  |                                                  |    |        |    |             |                         |    |    |    |    |   |   |
| SGO_1253 | 0.357                  | 6.621                | 0.0183  | 0.1387  | 9.000   | 17.500  | 23.6880  | 18.2124  | pyrE; orotate phosphoribosyltransferase          |    |        |    |             |                         |    |    |    |    |   |   |
|          |                        |                      |         |         | 10.500  | 25.000  | 31.5085  | 25.0000  |                                                  |    |        |    |             |                         |    |    |    |    |   |   |
| SGO_1260 | 0.150                  | 8.227                | 0.0123  | 0.0845  | 32.000  | 69.000  | 84.2240  | 71.8090  | deoD; purine nucleoside phosphorylase            |    |        |    |             |                         |    |    |    |    |   |   |
|          |                        |                      |         |         | 24.500  | 70.000  | 73.5198  | 70.0000  |                                                  |    |        |    |             |                         |    |    |    |    |   |   |

- Show detected proteins only  
 Show all proteins

Proteins found:  
624

Filter by category:

ABC Transporter

Test

Cutoff

q-Value

.005

p-Value

|             | Signif | Direction | Applies To                |
|-------------|--------|-----------|---------------------------|
| Red         | yes    | +         | ratios, bars              |
| Yellow      | no     | n/a       | bars                      |
| Green       | yes    | -         | ratios, bars              |
| Pink        | yes    | +         | p <sup>-</sup> , q-Values |
| Light Green | yes    | -         | p <sup>-</sup> , q-Values |

Dot Plots Dot Plots

Summary Table

SgFn vs Sg

SgPg vs Sg

SgPgFn vs Sg

SgPg vs SgFn

SgPgFn vs SgFn

SgPgFn vs SgPg

Coverage

SgPgFn vs Sg

Raw

Normalized

Log<sub>2</sub> Ratios

| Protein  | SgPgFn vs Sg           |                      |         |         | Raw    |         | Normalized |          | Description                                                       | Log <sub>2</sub> Ratios |    |    |   |   |   |   |
|----------|------------------------|----------------------|---------|---------|--------|---------|------------|----------|-------------------------------------------------------------------|-------------------------|----|----|---|---|---|---|
|          | Log <sub>2</sub> Ratio | Log <sub>2</sub> Sum | q-Value | p-Value | SgPgFn | Sg      | SgPgFn     | Sg       |                                                                   | -6                      | -4 | -2 | 0 | 2 | 4 | 6 |
| SGO_1263 | -0.436                 | 8.496                | 0.0106  | 0.0693  | 24.000 | 106.500 | 63.1680    | 110.8356 | purine nucleoside phosphorylase I, inosine and guanosine-specific |                         |    |    |   |   |   |   |
|          |                        |                      |         |         | 30.500 | 95.500  | 91.5246    | 95.5000  |                                                                   |                         |    |    |   |   |   |   |
| SGO_1264 | -0.125                 | 9.941                | 0.0572  | 0.5115  | 75.500 | 220.000 | 198.7161   | 228.9561 | deoB; phosphopentomutase                                          |                         |    |    |   |   |   |   |
|          |                        |                      |         |         | 91.000 | 282.000 | 273.0735   | 282.0000 |                                                                   |                         |    |    |   |   |   |   |
| SGO_1265 | 0.677                  | 7.670                | 0.0125  | 0.0861  | 21.500 | 26.000  | 56.5880    | 27.0585  | rpiA; ribose 5-phosphate isomerase                                |                         |    |    |   |   |   |   |
|          |                        |                      |         |         | 22.000 | 54.000  | 66.0178    | 54.0000  |                                                                   |                         |    |    |   |   |   |   |
| SGO_1266 | 0.563                  | 6.020                | 0.0059  | 0.0320  | 8.500  | 12.500  | 22.3720    | 13.0089  | trmE; tRNA modification GTPase TrmE                               |                         |    |    |   |   |   |   |
|          |                        |                      |         |         | 5.500  | 13.000  | 16.5044    | 13.0000  |                                                                   |                         |    |    |   |   |   |   |
| SGO_1273 | 1.987                  | 8.558                | 0.0018  | 0.0070  | 68.500 | 40.000  | 180.2921   | 41.6284  | rpoD; RNA polymerase sigma factor                                 |                         |    |    |   |   |   |   |
|          |                        |                      |         |         | 40.500 | 33.500  | 121.5327   | 33.5000  |                                                                   |                         |    |    |   |   |   |   |
| SGO_1276 | 0.481                  | 7.989                | 0.0059  | 0.0324  | 24.500 | 49.500  | 64.4840    | 51.5151  | rpsU; ribosomal protein S21                                       |                         |    |    |   |   |   |   |
|          |                        |                      |         |         | 28.000 | 54.000  | 84.0226    | 54.0000  |                                                                   |                         |    |    |   |   |   |   |
| SGO_1281 | -0.127                 | 4.265                | 0.0675  | 0.6167  |        | 5.500   |            | 5.7239   | penicillinase repressor, putative                                 |                         |    |    |   |   |   |   |
|          |                        |                      |         |         | 2.000  | 7.500   | 6.0016     | 7.5000   |                                                                   |                         |    |    |   |   |   |   |
| SGO_1283 | 0.335                  | 8.261                | 0.0009  | 0.0029  | 32.500 | 68.500  | 85.5400    | 71.2886  | oxidoreductase                                                    |                         |    |    |   |   |   |   |
|          |                        |                      |         |         | 28.500 | 64.500  | 85.5230    | 64.5000  |                                                                   |                         |    |    |   |   |   |   |
| SGO_1284 | 0.103                  | 5.968                | 0.0455  | 0.3963  | 5.500  | 15.500  | 14.4760    | 16.1310  | thioredoxin-disulfide reductase                                   |                         |    |    |   |   |   |   |
|          |                        |                      |         |         | 6.000  | 14.000  | 18.0048    | 14.0000  |                                                                   |                         |    |    |   |   |   |   |
| SGO_1293 | 0.069                  | 7.646                | 0.0692  | 0.6353  | 15.000 | 44.500  | 39.4800    | 46.3116  | asnS; asparaginyl-tRNA synthetase                                 |                         |    |    |   |   |   |   |
|          |                        |                      |         |         | 21.500 | 50.000  | 64.5174    | 50.0000  |                                                                   |                         |    |    |   |   |   |   |
| SGO_1297 | 1.112                  | 6.360                | 0.0001  | 0.0000  | 10.500 | 12.000  | 27.6360    | 12.4885  | aspC; aspartate aminotransferase                                  |                         |    |    |   |   |   |   |
|          |                        |                      |         |         | 9.500  | 13.500  | 28.5077    | 13.5000  |                                                                   |                         |    |    |   |   |   |   |
| SGO_1305 | -1.367                 | 5.998                | 0.0004  | 0.0007  | 4.000  | 21.500  | 10.5280    | 22.3753  | substrate-binding protein MsmE                                    |                         |    |    |   |   |   |   |
|          |                        |                      |         |         | 2.500  | 23.500  | 7.5020     | 23.5000  |                                                                   |                         |    |    |   |   |   |   |

- Show detected proteins only  
 Show all proteins

Proteins found:  
624

Filter by category:

ABC Transporter

Test

Cutoff

q-Value

p-Value

.005

| Signif | Direction | Applies To   |
|--------|-----------|--------------|
| yes    | +         | ratios, bars |
| no     | n/a       | bars         |
| yes    | -         | ratios, bars |
| yes    | +         | p-, q-Values |
| yes    | -         | p-, q-Values |

Dot Plots Dot Plots

Summary Table

SgFn vs Sg

SgPg vs Sg

SgPgFn vs Sg

SgPg vs SgFn

SgPgFn vs SgFn

SgPgFn vs SgPg

Coverage

| Protein  | SgPgFn vs Sg           |                      |         |         | Raw     |         | Normalized |          | Description                                         | Log <sub>2</sub> Ratios |    |    |   |   |
|----------|------------------------|----------------------|---------|---------|---------|---------|------------|----------|-----------------------------------------------------|-------------------------|----|----|---|---|
|          | Log <sub>2</sub> Ratio | Log <sub>2</sub> Sum | q-Value | p-Value | SgPgFn  | Sg      | SgPgFn     | Sg       |                                                     | -6                      | -4 | -2 | 0 | 2 |
| SGO_1312 | 3.152                  | 7.040                | 0.0004  | 0.0009  | 25.000  | 7.000   | 65.8000    | 7.2850   | pepT; peptidase T                                   |                         |    |    |   |   |
|          |                        |                      |         |         | 17.500  | 6.000   | 52.5141    | 6.0000   |                                                     |                         |    |    |   |   |
| SGO_1323 | 1.424                  | 8.182                | 0.0002  | 0.0003  | 41.500  | 42.500  | 109.2281   | 44.2302  | rpsP; ribosomal protein S16                         |                         |    |    |   |   |
|          |                        |                      |         |         | 34.000  | 35.000  | 102.0275   | 35.0000  |                                                     |                         |    |    |   |   |
| SGO_1327 | -0.794                 | 5.775                | 0.0079  | 0.0463  | 3.500   | 13.000  | 9.2120     | 13.5292  | HAD-superfamily subfamily IIA hydrolase, TIGR01457  |                         |    |    |   |   |
|          |                        |                      |         |         | 3.500   | 21.500  | 10.5028    | 21.5000  |                                                     |                         |    |    |   |   |
| SGO_1336 | -0.743                 | 5.818                | 0.0010  | 0.0032  | 3.500   | 17.000  | 9.2120     | 17.6921  | pcrA; ATP-dependent DNA helicase PcrA               |                         |    |    |   |   |
|          |                        |                      |         |         | 4.000   | 17.500  | 12.0032    | 17.5000  |                                                     |                         |    |    |   |   |
| SGO_1339 | 0.963                  | 11.757               | 0.0003  | 0.0003  | 454.000 | 551.000 | 1194.9287  | 573.4310 | pyk; pyruvate kinase                                |                         |    |    |   |   |
|          |                        |                      |         |         | 364.500 | 600.000 | 1093.7944  | 600.0000 |                                                     |                         |    |    |   |   |
| SGO_1340 | 0.630                  | 10.116               | 0.0002  | 0.0003  | 124.500 | 213.500 | 327.6842   | 222.1915 | Phosphofructokinase                                 |                         |    |    |   |   |
|          |                        |                      |         |         | 115.500 | 213.500 | 346.5933   | 213.5000 |                                                     |                         |    |    |   |   |
| SGO_1342 | -1.216                 | 10.281               | 0.0001  | 0.0000  | 71.000  | 423.500 | 186.8721   | 440.7405 | ABC transporter, ATP-binding protein SP1715         |                         |    |    |   |   |
|          |                        |                      |         |         | 62.500  | 429.000 | 187.5505   | 429.0000 |                                                     |                         |    |    |   |   |
| SGO_1364 | -2.201                 | 5.952                | 0.0174  | 0.1299  |         | 22.500  |            | 23.4160  | rumA-2; 23S rRNA (uracil-5-)-methyltransferase Ruma |                         |    |    |   |   |
|          |                        |                      |         |         | 2.000   | 32.500  | 6.0016     | 32.5000  |                                                     |                         |    |    |   |   |
| SGO_1365 | -2.531                 | 6.236                | 0.0012  | 0.0040  |         | 33.500  |            | 34.8638  | transcription regulator yrfE                        |                         |    |    |   |   |
|          |                        |                      |         |         | 2.000   | 34.500  | 6.0016     | 34.5000  |                                                     |                         |    |    |   |   |
| SGO_1369 | -0.928                 | 5.247                | 0.0072  | 0.0414  | 3.000   | 14.000  | 7.8960     | 14.5699  | L-2-hydroxyisocaproate dehydrogenase                |                         |    |    |   |   |
|          |                        |                      |         |         |         | 15.500  |            | 15.5000  |                                                     |                         |    |    |   |   |
| SGO_1370 | 1.637                  | 7.025                | 0.0003  | 0.0004  | 17.500  | 15.500  | 46.0600    | 16.1310  | Protein of unknown function (DUF964) superfamily    |                         |    |    |   |   |
|          |                        |                      |         |         | 17.500  | 15.500  | 52.5141    | 15.5000  |                                                     |                         |    |    |   |   |
| SGO_1372 | 0.923                  | 4.628                | 0.0109  | 0.0717  |         | 5.500   |            | 5.7239   | aroC; chorismate synthase                           |                         |    |    |   |   |
|          |                        |                      |         |         | 4.000   | 7.000   | 12.0032    | 7.0000   |                                                     |                         |    |    |   |   |

- Show detected proteins only
- Show all proteins

Proteins found: 624

Filter by category:

ABC Transporter

Test

Cutoff

q-Value

.005

p-Value

| Signif | Direction | Applies To   |
|--------|-----------|--------------|
| yes    | +         | ratios, bars |
| no     | n/a       | bars         |
| yes    | -         | ratios, bars |
| yes    | +         | p-, q-Values |
| yes    | -         | p-, q-Values |

Dot Plots Dot Plots



Summary Table SgFn vs Sg SgPg vs Sg SgPgFn vs Sg SgPg vs SgFn SgPgFn vs SgFn SgPgFn vs SgPg Coverage

| Protein  | SgPgFn vs Sg           |                      |         |         | Raw      |          | Normalized |           | Description                                               | Log <sub>2</sub> Ratios |    |    |   |   |   |
|----------|------------------------|----------------------|---------|---------|----------|----------|------------|-----------|-----------------------------------------------------------|-------------------------|----|----|---|---|---|
|          | Log <sub>2</sub> Ratio | Log <sub>2</sub> Sum | q-Value | p-Value | SgPgFn   | Sg       | SgPgFn     | Sg        |                                                           | -6                      | -4 | -2 | 0 | 2 | 4 |
| SGO_1373 | 0.062                  | 4.562                | 0.1026  | 0.9899  | 3.000    | 5.500    | 7.8960     | 5.7239    | aroB; 3-dehydroquinase synthase                           |                         |    |    |   |   |   |
|          |                        |                      |         |         |          | 10.000   |            | 10.0000   |                                                           |                         |    |    |   |   |   |
| SGO_1375 | 0.006                  | 5.308                | 0.1015  | 0.9771  | 5.000    | 11.000   | 13.1600    | 11.4478   | aroD; 3-dehydroquinase dehydratase, type I                |                         |    |    |   |   |   |
|          |                        |                      |         |         |          | 15.000   |            | 15.0000   |                                                           |                         |    |    |   |   |   |
| SGO_1377 | -3.781                 | 7.966                | 0.0002  | 0.0001  | 4.500    | 105.000  | 11.8440    | 109.2745  | sulfatase                                                 |                         |    |    |   |   |   |
|          |                        |                      |         |         | 2.000    | 123.000  | 6.0016     | 123.0000  |                                                           |                         |    |    |   |   |   |
| SGO_1381 | -0.907                 | 6.330                | 0.0003  | 0.0006  | 5.500    | 24.000   | 14.4760    | 24.9770   | csn1; CRISPR-associated protein, Csn1 family              |                         |    |    |   |   |   |
|          |                        |                      |         |         | 4.500    | 27.500   | 13.5036    | 27.5000   |                                                           |                         |    |    |   |   |   |
| SGO_1383 | 0.813                  | 9.118                | 0.0003  | 0.0004  | 65.500   | 91.500   | 172.3961   | 95.2249   | rplS; ribosomal protein L19                               |                         |    |    |   |   |   |
|          |                        |                      |         |         | 60.500   | 106.500  | 181.5489   | 106.5000  |                                                           |                         |    |    |   |   |   |
| SGO_1390 | -0.819                 | 5.995                | 0.0031  | 0.0140  | 5.500    | 20.000   | 14.4760    | 20.8142   | ligA; DNA ligase, NAD-dependent                           |                         |    |    |   |   |   |
|          |                        |                      |         |         | 3.000    | 19.500   | 9.0024     | 19.5000   |                                                           |                         |    |    |   |   |   |
| SGO_1397 | -0.134                 | 6.668                | 0.0535  | 0.4738  | 8.500    | 20.000   | 22.3720    | 20.8142   | map; methionine aminopeptidase, type I                    |                         |    |    |   |   |   |
|          |                        |                      |         |         | 8.500    | 33.000   | 25.5069    | 33.0000   |                                                           |                         |    |    |   |   |   |
| SGO_1400 | -1.006                 | 5.997                | 0.0111  | 0.0740  | 6.500    | 18.500   | 17.1080    | 19.2531   | murA-2; UDP-N-acetylglucosamine 1-carboxyvinyltransferase |                         |    |    |   |   |   |
|          |                        |                      |         |         | 2.000    | 21.500   | 6.0016     | 21.5000   |                                                           |                         |    |    |   |   |   |
| SGO_1414 | 0.673                  | 5.281                | 0.0084  | 0.0507  | 5.000    | 5.500    | 13.1600    | 5.7239    | rexB; putative exonuclease RexB                           |                         |    |    |   |   |   |
|          |                        |                      |         |         | 3.500    | 9.500    | 10.5028    | 9.5000    |                                                           |                         |    |    |   |   |   |
| SGO_1422 | 0.474                  | 7.184                | 0.0121  | 0.0817  | 13.000   | 28.500   | 34.2160    | 29.6602   | hypothetical protein SGO_1422                             |                         |    |    |   |   |   |
|          |                        |                      |         |         | 17.000   | 30.500   | 51.0137    | 30.5000   |                                                           |                         |    |    |   |   |   |
| SGO_1426 | 2.044                  | 14.741               | 0.0001  | 0.0000  | 4114.000 | 2771.500 | 10828.054  | 2884.3267 | eno; enolase                                              |                         |    |    |   |   |   |
|          |                        |                      |         |         | 3729.500 | 2470.500 | 11191.512  | 2470.5000 |                                                           |                         |    |    |   |   |   |
| SGO_1431 | -1.818                 | 10.285               | 0.0024  | 0.0100  | 51.500   | 570.000  | 135.5481   | 593.2045  | EzrA; Septation ring formation regulator ezrA             |                         |    |    |   |   |   |
|          |                        |                      |         |         | 45.000   | 383.500  | 135.0363   | 383.5000  |                                                           |                         |    |    |   |   |   |

Show detected proteins only  
 Show all proteins  
 Filter by category:

Proteins found: 624

**Test**      **Cutoff**  
     

|             | Signif | Direction | Applies To   |
|-------------|--------|-----------|--------------|
| Red         | yes    | +         | ratios, bars |
| Yellow      | no     | n/a       | bars         |
| Green       | yes    | -         | ratios, bars |
| Pink        | yes    | +         | p-, q-Values |
| Light Green | yes    | -         | p-, q-Values |

Summary Table

SgFn vs Sg

SgPg vs Sg

SgPgFn vs Sg

SgPg vs SgFn

SgPgFn vs SgFn

SgPgFn vs SgPg

Coverage

SgPgFn vs Sg

Raw

Normalized

Log<sub>2</sub> Ratios

| Protein  | SgPgFn vs Sg           |                      |         |         | Raw     |         |          |          | Normalized                                                                   |    |        |    | Description | Log <sub>2</sub> Ratios |    |    |    |    |   |   |
|----------|------------------------|----------------------|---------|---------|---------|---------|----------|----------|------------------------------------------------------------------------------|----|--------|----|-------------|-------------------------|----|----|----|----|---|---|
|          | Log <sub>2</sub> Ratio | Log <sub>2</sub> Sum | q-Value | p-Value | SgPgFn  | Sg      | SgPgFn   | Sg       | SgPgFn                                                                       | Sg | SgPgFn | Sg |             | SgPgFn                  | Sg | -6 | -4 | -2 | 0 | 2 |
| SGO_1432 | -0.175                 | 7.394                | 0.0706  | 0.6504  | 19.500  | 33.500  | 51.3240  | 34.8638  | gyrB; DNA gyrase, B subunit                                                  |    |        |    |             |                         |    |    |    |    |   |   |
|          |                        |                      |         |         | 9.500   | 53.500  | 28.5077  | 53.5000  |                                                                              |    |        |    |             |                         |    |    |    |    |   |   |
| SGO_1434 | 1.074                  | 2.957                |         |         | 2.000   |         | 5.2640   |          | thiJ; 4-methyl-5(beta-hydroxyethyl)-thiazole monophosphate synthesis protein |    |        |    |             |                         |    |    |    |    |   |   |
|          |                        |                      |         |         |         | 2.500   |          | 2.5000   |                                                                              |    |        |    |             |                         |    |    |    |    |   |   |
| SGO_1439 | -1.087                 | 7.383                | 0.0003  | 0.0006  | 9.000   | 55.500  | 23.6880  | 57.7594  | ftsX; cell division protein FtsX                                             |    |        |    |             |                         |    |    |    |    |   |   |
|          |                        |                      |         |         | 10.000  | 55.500  | 30.0081  | 55.5000  |                                                                              |    |        |    |             |                         |    |    |    |    |   |   |
| SGO_1440 | -2.111                 | 8.027                | 0.0001  | 0.0000  | 9.500   | 104.500 | 25.0040  | 108.7542 | cell-division ATP-binding protein FtsE                                       |    |        |    |             |                         |    |    |    |    |   |   |
|          |                        |                      |         |         | 8.000   | 103.000 | 24.0065  | 103.0000 |                                                                              |    |        |    |             |                         |    |    |    |    |   |   |
| SGO_1441 | 0.530                  | 6.167                | 0.0258  | 0.2063  | 11.500  | 14.500  | 30.2680  | 15.0903  | prfB; peptide chain release factor 2                                         |    |        |    |             |                         |    |    |    |    |   |   |
|          |                        |                      |         |         | 4.500   | 13.000  | 13.5036  | 13.0000  |                                                                              |    |        |    |             |                         |    |    |    |    |   |   |
| SGO_1446 | -1.757                 | 5.755                | 0.0038  | 0.0190  | 3.000   | 15.000  | 7.8960   | 15.6106  | murF; UDP-N-acetylmuramoyl-tripeptide--D-alanyl-D-alanine ligase             |    |        |    |             |                         |    |    |    |    |   |   |
|          |                        |                      |         |         | 1.500   | 26.000  | 4.5012   | 26.0000  |                                                                              |    |        |    |             |                         |    |    |    |    |   |   |
| SGO_1447 | -0.234                 | 6.516                | 0.0002  | 0.0002  | 8.000   | 23.500  | 21.0560  | 24.4567  | ddlA; D-Ala-D-Ala ligase                                                     |    |        |    |             |                         |    |    |    |    |   |   |
|          |                        |                      |         |         | 7.000   | 25.000  | 21.0057  | 25.0000  |                                                                              |    |        |    |             |                         |    |    |    |    |   |   |
| SGO_1450 | -0.049                 | 5.584                | 0.0945  | 0.9050  | 2.000   | 5.000   | 5.2640   | 5.2035   | hypothetical protein SGO_1450                                                |    |        |    |             |                         |    |    |    |    |   |   |
|          |                        |                      |         |         | 6.000   | 19.500  | 18.0048  | 19.5000  |                                                                              |    |        |    |             |                         |    |    |    |    |   |   |
| SGO_1451 | 1.596                  | 7.952                | 0.0003  | 0.0004  | 33.500  | 33.500  | 88.1721  | 34.8638  | frr; ribosome recycling factor                                               |    |        |    |             |                         |    |    |    |    |   |   |
|          |                        |                      |         |         | 32.500  | 27.000  | 97.5262  | 27.0000  |                                                                              |    |        |    |             |                         |    |    |    |    |   |   |
| SGO_1452 | 0.769                  | 7.227                | 0.0011  | 0.0036  | 17.500  | 30.500  | 46.0600  | 31.7416  | pyrH; uridylyate kinase                                                      |    |        |    |             |                         |    |    |    |    |   |   |
|          |                        |                      |         |         | 16.000  | 24.000  | 48.0129  | 24.0000  |                                                                              |    |        |    |             |                         |    |    |    |    |   |   |
| SGO_1455 | 1.539                  | 9.954                | 0.0016  | 0.0063  | 117.500 | 129.500 | 309.2602 | 134.7719 | rplA; ribosomal protein L1                                                   |    |        |    |             |                         |    |    |    |    |   |   |
|          |                        |                      |         |         | 143.500 | 117.000 | 430.6159 | 117.0000 |                                                                              |    |        |    |             |                         |    |    |    |    |   |   |
| SGO_1456 | 1.340                  | 8.456                | 0.0002  | 0.0002  | 45.500  | 46.500  | 119.7561 | 48.3930  | rplK; ribosomal protein L11                                                  |    |        |    |             |                         |    |    |    |    |   |   |
|          |                        |                      |         |         | 44.000  | 51.000  | 132.0355 | 51.0000  |                                                                              |    |        |    |             |                         |    |    |    |    |   |   |

 Show detected proteins only Show all proteinsProteins found:  
624 Filter by category:

ABC Transporter

Test

Cutoff

q-Value

.005

p-Value

|             | Signif | Direction | Applies To   |
|-------------|--------|-----------|--------------|
| Red         | yes    | +         | ratios, bars |
| Yellow      | no     | n/a       | bars         |
| Green       | yes    | -         | ratios, bars |
| Pink        | yes    | +         | p-, q-Values |
| Light Green | yes    | -         | p-, q-Values |

Dot Plots Dot Plots

Summary Table SgFn vs Sg SgPg vs Sg SgPgFn vs Sg SgPg vs SgFn SgPgFn vs SgFn SgPgFn vs SgPg Coverage

| Protein  | SgPgFn vs Sg           |                      |         |         | Raw    |        | Normalized |         | Description                                     | Log <sub>2</sub> Ratios |    |    |   |   |
|----------|------------------------|----------------------|---------|---------|--------|--------|------------|---------|-------------------------------------------------|-------------------------|----|----|---|---|
|          | Log <sub>2</sub> Ratio | Log <sub>2</sub> Sum | q-Value | p-Value | SgPgFn | Sg     | SgPgFn     | Sg      |                                                 | -6                      | -4 | -2 | 0 | 2 |
| SGO_1458 | -3.490                 | 6.985                | 0.0199  | 0.1543  | 2.000  | 71.500 | 5.2640     | 74.4107 | aha1; cation-transporting ATPase yfgQ           |                         |    |    |   |   |
|          |                        |                      |         |         |        | 47.000 |            | 47.0000 |                                                 |                         |    |    |   |   |
| SGO_1460 | -2.301                 | 6.850                | 0.0154  | 0.1116  | 4.000  | 57.500 | 10.5280    | 59.8408 | DNA translocase ftsK                            |                         |    |    |   |   |
|          |                        |                      |         |         |        | 45.000 |            | 45.0000 |                                                 |                         |    |    |   |   |
| SGO_1463 | -1.721                 | 7.388                | 0.0001  | 0.0001  | 8.000  | 59.500 | 21.0560    | 61.9222 | peptidyl-prolyl cis-trans isomerase             |                         |    |    |   |   |
|          |                        |                      |         |         | 6.000  | 66.500 | 18.0048    | 66.5000 |                                                 |                         |    |    |   |   |
| SGO_1464 | -1.964                 | 7.359                | 0.0007  | 0.0020  | 7.000  | 55.000 | 18.4240    | 57.2390 | uncharacterized probable metal-binding protein  |                         |    |    |   |   |
|          |                        |                      |         |         | 5.000  | 73.500 | 15.0040    | 73.5000 |                                                 |                         |    |    |   |   |
| SGO_1465 | -0.670                 | 6.990                | 0.0048  | 0.0254  | 10.000 | 32.000 | 26.3200    | 33.3027 | ABC transporter, ATP-binding protein SP0770     |                         |    |    |   |   |
|          |                        |                      |         |         | 7.500  | 45.000 | 22.5061    | 45.0000 |                                                 |                         |    |    |   |   |
| SGO_1469 | 0.313                  | 7.853                | 0.0043  | 0.0221  | 22.500 | 48.500 | 59.2200    | 50.4744 | glmU; UDP-N-acetylglucosamine pyrophosphorylase |                         |    |    |   |   |
|          |                        |                      |         |         | 23.000 | 52.500 | 69.0186    | 52.5000 |                                                 |                         |    |    |   |   |
| SGO_1472 | 0.170                  | 3.088                |         |         |        |        |            |         | acetyltransferase, GNAT family                  |                         |    |    |   |   |
|          |                        |                      |         |         | 1.500  | 4.000  | 4.5012     | 4.0000  |                                                 |                         |    |    |   |   |
| SGO_1486 | 1.330                  | 3.932                | 0.0225  | 0.1786  | 2.000  |        | 5.2640     |         | beta-galactosidase                              |                         |    |    |   |   |
|          |                        |                      |         |         | 2.500  | 2.500  | 7.5020     | 2.5000  |                                                 |                         |    |    |   |   |
| SGO_1516 | 0.291                  | 5.601                | 0.0057  | 0.0306  | 5.000  | 9.500  | 13.1600    | 9.8867  | lacD-2; tagatose 1,6-diphosphate aldolase       |                         |    |    |   |   |
|          |                        |                      |         |         | 4.500  | 12.000 | 13.5036    | 12.0000 |                                                 |                         |    |    |   |   |
| SGO_1530 | -0.321                 | 8.323                | 0.0092  | 0.0575  | 26.000 | 95.500 | 68.4320    | 99.3878 | methionine-tRNA ligase                          |                         |    |    |   |   |
|          |                        |                      |         |         | 24.500 | 79.000 | 73.5198    | 79.0000 |                                                 |                         |    |    |   |   |
| SGO_1531 | 0.273                  | 5.947                | 0.0295  | 0.2398  | 5.000  | 13.000 | 13.1600    | 13.5292 | xth; exodeoxyribonuclease III                   |                         |    |    |   |   |
|          |                        |                      |         |         | 7.000  | 14.000 | 21.0057    | 14.0000 |                                                 |                         |    |    |   |   |
| SGO_1534 | 1.284                  | 5.196                | 0.0428  | 0.3687  |        | 3.500  |            | 3.6425  | ArsC family                                     |                         |    |    |   |   |
|          |                        |                      |         |         | 6.000  | 15.000 | 18.0048    | 15.0000 |                                                 |                         |    |    |   |   |

Show detected proteins only  
 Show all proteins  
 Filter by category:

Proteins found: 624

**Test**      **Cutoff**  
     

|                                                                    | Signif | Direction | Applies To   |
|--------------------------------------------------------------------|--------|-----------|--------------|
| <span style="background-color: red; color: black;"> </span>        | yes    | +         | ratios, bars |
| <span style="background-color: yellow; color: black;"> </span>     | no     | n/a       | bars         |
| <span style="background-color: green; color: black;"> </span>      | yes    | -         | ratios, bars |
| <span style="background-color: lightgreen; color: black;"> </span> | yes    | +         | p-, q-Values |
| <span style="background-color: pink; color: black;"> </span>       | yes    | -         | p-, q-Values |

[Dot Plots](#)

Summary Table SgFn vs Sg SgPg vs Sg SgPgFn vs Sg SgPg vs SgFn SgPgFn vs SgFn SgPgFn vs SgPg Coverage

| Protein  | SgPgFn vs Sg           |                      |         |         | Raw    |         | Normalized |          | Description                                                 | Log <sub>2</sub> Ratios |    |    |   |   |
|----------|------------------------|----------------------|---------|---------|--------|---------|------------|----------|-------------------------------------------------------------|-------------------------|----|----|---|---|
|          | Log <sub>2</sub> Ratio | Log <sub>2</sub> Sum | q-Value | p-Value | SgPgFn | Sg      | SgPgFn     | Sg       |                                                             | -6                      | -4 | -2 | 0 | 2 |
| SGO_1536 | -0.798                 | 6.124                | 0.0053  | 0.0282  | 4.000  | 18.000  | 10.5280    | 18.7328  | conserved hypothetical protein TIGR00096                    |                         |    |    |   |   |
|          |                        |                      |         |         | 5.000  | 25.500  | 15.0040    | 25.5000  |                                                             |                         |    |    |   |   |
| SGO_1539 | 0.614                  | 6.430                | 0.0085  | 0.0520  | 8.000  | 16.000  | 21.0560    | 16.6514  | tmk; thymidylate kinase                                     |                         |    |    |   |   |
|          |                        |                      |         |         | 10.500 | 17.000  | 31.5085    | 17.0000  |                                                             |                         |    |    |   |   |
| SGO_1541 | -2.232                 | 7.454                | 0.0008  | 0.0022  | 4.500  | 60.500  | 11.8440    | 62.9629  | atpC; ATP synthase F1, epsilon subunit                      |                         |    |    |   |   |
|          |                        |                      |         |         | 6.500  | 81.000  | 19.5052    | 81.0000  |                                                             |                         |    |    |   |   |
| SGO_1542 | -1.022                 | 10.277               | 0.0002  | 0.0002  | 73.000 | 410.500 | 192.1361   | 427.2113 | atpD; ATP synthase F1, beta subunit                         |                         |    |    |   |   |
|          |                        |                      |         |         | 72.500 | 403.500 | 217.5586   | 403.5000 |                                                             |                         |    |    |   |   |
| SGO_1543 | -2.555                 | 7.153                | 0.0001  | 0.0001  | 4.500  | 60.500  | 11.8440    | 62.9629  | atpG; ATP synthase F1, gamma subunit                        |                         |    |    |   |   |
|          |                        |                      |         |         | 3.000  | 58.500  | 9.0024     | 58.5000  |                                                             |                         |    |    |   |   |
| SGO_1544 | -0.675                 | 10.144               | 0.0002  | 0.0003  | 79.000 | 330.000 | 207.9281   | 343.4342 | atpA; ATP synthase F1, alpha subunit                        |                         |    |    |   |   |
|          |                        |                      |         |         | 76.000 | 352.000 | 228.0614   | 352.0000 |                                                             |                         |    |    |   |   |
| SGO_1545 | -2.474                 | 7.521                | 0.0002  | 0.0003  | 5.500  | 80.000  | 14.4760    | 83.2568  | atpH; ATP synthase F1, delta subunit                        |                         |    |    |   |   |
|          |                        |                      |         |         | 4.500  | 72.500  | 13.5036    | 72.5000  |                                                             |                         |    |    |   |   |
| SGO_1546 | -1.162                 | 8.114                | 0.0003  | 0.0005  | 16.500 | 86.500  | 43.4280    | 90.0214  | atpF; ATP synthase F0, B subunit                            |                         |    |    |   |   |
|          |                        |                      |         |         | 14.000 | 101.500 | 42.0113    | 101.5000 |                                                             |                         |    |    |   |   |
| SGO_1550 | -0.160                 | 7.692                | 0.0416  | 0.3558  | 16.500 | 45.000  | 43.4280    | 46.8319  | glgP-1; glycogen phosphorylase                              |                         |    |    |   |   |
|          |                        |                      |         |         | 18.000 | 62.500  | 54.0145    | 62.5000  |                                                             |                         |    |    |   |   |
| SGO_1551 | 0.335                  | 5.734                | 0.0978  | 0.9376  | 4.000  | 5.000   | 10.5280    | 5.2035   | glgA; Glycogen synthase                                     |                         |    |    |   |   |
|          |                        |                      |         |         | 5.500  | 21.000  | 16.5044    | 21.0000  |                                                             |                         |    |    |   |   |
| SGO_1552 | 1.172                  | 7.482                | 0.0036  | 0.0174  | 27.500 | 32.500  | 72.3800    | 33.8231  | glgD; glucose-1-phosphate adenylyltransferase, GlgD subunit |                         |    |    |   |   |
|          |                        |                      |         |         | 17.000 | 21.500  | 51.0137    | 21.5000  |                                                             |                         |    |    |   |   |
| SGO_1553 | 1.201                  | 7.268                | 0.0007  | 0.0018  | 19.500 | 18.500  | 51.3240    | 19.2531  | glgC; glucose-1-phosphate adenylyltransferase               |                         |    |    |   |   |
|          |                        |                      |         |         | 18.500 | 28.000  | 55.5149    | 28.0000  |                                                             |                         |    |    |   |   |

Show detected proteins only  
 Show all proteins

Filter by category:

Proteins found:  
624

Test Cutoff

| Signif | Direction | Applies To   |
|--------|-----------|--------------|
| yes    | +         | ratios, bars |
| no     | n/a       | bars         |
| yes    | -         | ratios, bars |
| yes    | +         | p-, q-Values |
| yes    | -         | p-, q-Values |

Dot Plots  Dot Plots

Summary Table

SgFn vs Sg

SgPg vs Sg

SgPgFn vs Sg

SgPg vs SgFn

SgPgFn vs SgFn

SgPgFn vs SgPg

Coverage

| Protein  | SgPgFn vs Sg           |                      |         |         | Raw     |         | Normalized |          | Description                                                  | Log <sub>2</sub> Ratios |    |    |   |   |
|----------|------------------------|----------------------|---------|---------|---------|---------|------------|----------|--------------------------------------------------------------|-------------------------|----|----|---|---|
|          | Log <sub>2</sub> Ratio | Log <sub>2</sub> Sum | q-Value | p-Value | SgPgFn  | Sg      | SgPgFn     | Sg       |                                                              | -6                      | -4 | -2 | 0 | 2 |
| SGO_1554 | 1.318                  | 7.518                | 0.0012  | 0.0042  | 23.000  | 19.000  | 60.5360    | 19.7735  | glgB; 1,4-alpha-glucan branching enzyme                      |                         |    |    |   |   |
|          |                        |                      |         |         | 23.000  | 34.000  | 69.0186    | 34.0000  |                                                              |                         |    |    |   |   |
| SGO_1555 | -0.270                 | 11.011               | 0.0082  | 0.0487  | 163.500 | 575.500 | 430.3322   | 598.9284 | ptsI; phosphoenolpyruvate-protein phosphotransferase         |                         |    |    |   |   |
|          |                        |                      |         |         | 168.500 | 528.500 | 505.6361   | 528.5000 |                                                              |                         |    |    |   |   |
| SGO_1556 | 1.139                  | 12.044               | 0.0021  | 0.0088  | 467.500 | 646.000 | 1230.4607  | 672.2984 | phosphocarrier protein HPr                                   |                         |    |    |   |   |
|          |                        |                      |         |         | 561.500 | 635.500 | 1684.9535  | 635.5000 |                                                              |                         |    |    |   |   |
| SGO_1558 | -0.012                 | 8.530                | 0.0856  | 0.8069  | 34.500  | 83.000  | 90.8041    | 86.3789  | nrdE; ribonucleoside-diphosphate reductase large chain       |                         |    |    |   |   |
|          |                        |                      |         |         | 31.000  | 99.500  | 93.0250    | 99.5000  |                                                              |                         |    |    |   |   |
| SGO_1559 | 1.078                  | 8.326                | 0.0002  | 0.0002  | 41.000  | 45.500  | 107.9121   | 47.3523  | ribonucleoside-diphosphate reductase, beta subunit           |                         |    |    |   |   |
|          |                        |                      |         |         | 36.500  | 56.000  | 109.5295   | 56.0000  |                                                              |                         |    |    |   |   |
| SGO_1570 | -0.251                 | 9.309                | 0.0180  | 0.1358  | 50.000  | 146.500 | 131.6001   | 152.4640 | alaS; alanyl-tRNA synthetase                                 |                         |    |    |   |   |
|          |                        |                      |         |         | 52.500  | 192.500 | 157.5424   | 192.5000 |                                                              |                         |    |    |   |   |
| SGO_1572 | -5.725                 | 9.645                | 0.0016  | 0.0062  |         | 377.500 |            | 392.8679 | proteinase maturation protein, putative                      |                         |    |    |   |   |
|          |                        |                      |         |         | 2.500   | 400.500 | 7.5020     | 400.5000 |                                                              |                         |    |    |   |   |
| SGO_1574 | 0.810                  | 8.890                | 0.0002  | 0.0002  | 55.500  | 81.000  | 146.0761   | 84.2975  | pepF-1; oligoendopeptidase F                                 |                         |    |    |   |   |
|          |                        |                      |         |         | 52.000  | 88.000  | 156.0420   | 88.0000  |                                                              |                         |    |    |   |   |
| SGO_1585 | -2.399                 | 6.151                | 0.0222  | 0.1761  |         | 38.500  |            | 40.0673  | D-Alanyl-D-Alanine carboxypeptidase                          |                         |    |    |   |   |
|          |                        |                      |         |         | 2.000   | 25.000  | 6.0016     | 25.0000  |                                                              |                         |    |    |   |   |
| SGO_1587 | -0.217                 | 5.809                | 0.0458  | 0.3997  | 5.000   | 10.000  | 13.1600    | 10.4071  | queA; S-adenosylmethionine:tRNA ribosyltransferase-isomerase |                         |    |    |   |   |
|          |                        |                      |         |         | 4.000   | 20.500  | 12.0032    | 20.5000  |                                                              |                         |    |    |   |   |
| SGO_1591 | -1.727                 | 6.702                | 0.0018  | 0.0070  | 4.500   | 31.500  | 11.8440    | 32.7824  | arcC; carbamate kinase                                       |                         |    |    |   |   |
|          |                        |                      |         |         | 4.000   | 47.500  | 12.0032    | 47.5000  |                                                              |                         |    |    |   |   |
| SGO_1592 | -0.397                 | 9.329                | 0.0032  | 0.0149  | 58.500  | 174.500 | 153.9721   | 181.6038 | arcB; ornithine carbamoyltransferase                         |                         |    |    |   |   |
|          |                        |                      |         |         | 41.500  | 183.000 | 124.5335   | 183.0000 |                                                              |                         |    |    |   |   |

- Show detected proteins only
- Show all proteins

Proteins found: 624

Filter by category:

ABC Transporter

Test

Cutoff

q-Value

.005

p-Value

| Signif | Direction | Applies To   |
|--------|-----------|--------------|
| yes    | +         | ratios, bars |
| no     | n/a       | bars         |
| yes    | -         | ratios, bars |
| yes    | +         | p-, q-Values |
| yes    | -         | p-, q-Values |

Dot Plots Dot Plots

Summary Table

SgFn vs Sg

SgPg vs Sg

SgPgFn vs Sg

SgPg vs SgFn

SgPgFn vs SgFn

SgPgFn vs SgPg

Coverage

| Protein  | SgPgFn vs Sg           |                      |         |         | Raw    |         |          |          | Normalized |    |        |    | Description | Log <sub>2</sub> Ratios |    |    |   |   |   |   |
|----------|------------------------|----------------------|---------|---------|--------|---------|----------|----------|------------|----|--------|----|-------------|-------------------------|----|----|---|---|---|---|
|          | Log <sub>2</sub> Ratio | Log <sub>2</sub> Sum | q-Value | p-Value | SgPgFn | Sg      | SgPgFn   | Sg       | SgPgFn     | Sg | SgPgFn | Sg |             | -6                      | -4 | -2 | 0 | 2 | 4 | 6 |
| SGO_1593 | -0.377                 | 9.191                | 0.0021  | 0.0090  | 47.500 | 148.500 | 125.0201 | 154.5454 |            |    |        |    |             |                         |    |    |   |   |   |   |
|          |                        |                      |         |         | 43.000 | 176.000 | 129.0347 | 176.0000 |            |    |        |    |             |                         |    |    |   |   |   |   |
| SGO_1599 | 0.277                  | 9.360                | 0.0057  | 0.0308  | 73.000 | 135.500 | 192.1361 | 141.0162 |            |    |        |    |             |                         |    |    |   |   |   |   |
|          |                        |                      |         |         | 56.000 | 156.000 | 168.0452 | 156.0000 |            |    |        |    |             |                         |    |    |   |   |   |   |
| SGO_1604 | -3.267                 | 6.516                | 0.0101  | 0.0647  |        | 38.000  |          | 39.5470  |            |    |        |    |             |                         |    |    |   |   |   |   |
|          |                        |                      |         |         | 1.500  | 47.500  | 4.5012   | 47.5000  |            |    |        |    |             |                         |    |    |   |   |   |   |
| SGO_1605 | -2.978                 | 6.243                | 0.0106  | 0.0686  |        | 31.000  |          | 32.2620  |            |    |        |    |             |                         |    |    |   |   |   |   |
|          |                        |                      |         |         | 1.500  | 39.000  | 4.5012   | 39.0000  |            |    |        |    |             |                         |    |    |   |   |   |   |
| SGO_1609 | -0.912                 | 8.175                | 0.0003  | 0.0004  | 20.500 | 88.500  | 53.9560  | 92.1028  |            |    |        |    |             |                         |    |    |   |   |   |   |
|          |                        |                      |         |         | 15.500 | 96.500  | 46.5125  | 96.5000  |            |    |        |    |             |                         |    |    |   |   |   |   |
| SGO_1617 | 0.146                  | 6.211                | 0.0823  | 0.7733  | 6.500  | 12.000  | 17.1080  | 12.4885  |            |    |        |    |             |                         |    |    |   |   |   |   |
|          |                        |                      |         |         | 7.000  | 23.500  | 21.0057  | 23.5000  |            |    |        |    |             |                         |    |    |   |   |   |   |
| SGO_1619 | -1.811                 | 9.715                | 0.0009  | 0.0029  | 38.000 | 357.500 | 100.0161 | 372.0537 |            |    |        |    |             |                         |    |    |   |   |   |   |
|          |                        |                      |         |         | 28.500 | 283.000 | 85.5230  | 283.0000 |            |    |        |    |             |                         |    |    |   |   |   |   |
| SGO_1621 | -1.626                 | 5.242                | 0.0106  | 0.0693  | 2.000  | 14.500  | 5.2640   | 15.0903  |            |    |        |    |             |                         |    |    |   |   |   |   |
|          |                        |                      |         |         |        | 17.500  |          | 17.5000  |            |    |        |    |             |                         |    |    |   |   |   |   |
| SGO_1622 | 0.164                  | 5.675                | 0.0620  | 0.5594  | 4.000  | 14.000  | 10.5280  | 14.5699  |            |    |        |    |             |                         |    |    |   |   |   |   |
|          |                        |                      |         |         | 5.500  | 9.500   | 16.5044  | 9.5000   |            |    |        |    |             |                         |    |    |   |   |   |   |
| SGO_1623 | -1.620                 | 6.404                | 0.0071  | 0.0405  | 4.500  | 33.500  | 11.8440  | 34.8638  |            |    |        |    |             |                         |    |    |   |   |   |   |
|          |                        |                      |         |         |        | 38.000  |          | 38.0000  |            |    |        |    |             |                         |    |    |   |   |   |   |
| SGO_1624 | -0.601                 | 5.436                | 0.0431  | 0.3719  |        | 19.500  |          | 20.2938  |            |    |        |    |             |                         |    |    |   |   |   |   |
|          |                        |                      |         |         | 3.500  | 12.500  | 10.5028  | 12.5000  |            |    |        |    |             |                         |    |    |   |   |   |   |
| SGO_1625 | -2.134                 | 7.916                | 0.0001  | 0.0001  | 10.500 | 95.000  | 27.6360  | 98.8674  |            |    |        |    |             |                         |    |    |   |   |   |   |
|          |                        |                      |         |         | 6.000  | 97.000  | 18.0048  | 97.0000  |            |    |        |    |             |                         |    |    |   |   |   |   |

- Show detected proteins only
- Show all proteins

Proteins found: 624

Filter by category:

ABC Transporter

Test

Cutoff

q-Value

p-Value

.005

| Signif | Direction | Applies To   |
|--------|-----------|--------------|
| yes    | +         | ratios, bars |
| no     | n/a       | bars         |
| yes    | -         | ratios, bars |
| yes    | +         | p-, q-Values |
| yes    | -         | p-, q-Values |

Dot Plots Dot Plots

Summary Table

SgFn vs Sg

SgPg vs Sg

SgPgFn vs Sg

SgPg vs SgFn

SgPgFn vs SgFn

SgPgFn vs SgPg

Coverage

| Protein  | SgPgFn vs Sg           |                      |         |         | Raw    |         | Normalized |          | Description                                                           | Log <sub>2</sub> Ratios |    |    |   |   |
|----------|------------------------|----------------------|---------|---------|--------|---------|------------|----------|-----------------------------------------------------------------------|-------------------------|----|----|---|---|
|          | Log <sub>2</sub> Ratio | Log <sub>2</sub> Sum | q-Value | p-Value | SgPgFn | Sg      | SgPgFn     | Sg       |                                                                       | -6                      | -4 | -2 | 0 | 2 |
| SGO_1626 | -0.741                 | 7.124                | 0.0024  | 0.0104  | 9.500  | 37.000  | 25.0040    | 38.5063  | branched-chain amino acid ABC transporter, ATP-binding protein        |                         |    |    |   |   |
|          |                        |                      |         |         | 9.000  | 49.000  | 27.0073    | 49.0000  |                                                                       |                         |    |    |   |   |
| SGO_1627 | -1.098                 | 7.407                | 0.0031  | 0.0142  | 12.000 | 64.500  | 31.5840    | 67.1258  | branched-chain amino acid ABC transporter, ATP-binding protein        |                         |    |    |   |   |
|          |                        |                      |         |         | 7.500  | 48.500  | 22.5061    | 48.5000  |                                                                       |                         |    |    |   |   |
| SGO_1630 | -1.610                 | 10.482               | 0.0001  | 0.0000  | 68.500 | 509.000 | 180.2921   | 529.7212 | branched-chain amino acid ABC transporter, amino acid-binding protein |                         |    |    |   |   |
|          |                        |                      |         |         | 57.500 | 547.500 | 172.5464   | 547.5000 |                                                                       |                         |    |    |   |   |
| SGO_1632 | 0.368                  | 7.633                | 0.0375  | 0.3174  | 12.500 | 37.500  | 32.9000    | 39.0266  | clpP; ATP-dependent Clp protease, proteolytic subunit ClpP            |                         |    |    |   |   |
|          |                        |                      |         |         | 28.000 | 42.500  | 84.0226    | 42.5000  |                                                                       |                         |    |    |   |   |
| SGO_1633 | 0.812                  | 8.067                | 0.0046  | 0.0242  | 38.500 | 45.000  | 101.3321   | 46.8319  | upp; uracil phosphoribosyltransferase                                 |                         |    |    |   |   |
|          |                        |                      |         |         | 23.500 | 49.500  | 70.5190    | 49.5000  |                                                                       |                         |    |    |   |   |
| SGO_1648 | 1.285                  | 8.978                | 0.0004  | 0.0007  | 70.500 | 61.500  | 185.5561   | 64.0036  | ppx1; inorganic pyrophosphatase, manganese-dependent                  |                         |    |    |   |   |
|          |                        |                      |         |         | 57.000 | 83.500  | 171.0460   | 83.5000  |                                                                       |                         |    |    |   |   |
| SGO_1649 | -2.213                 | 5.763                | 0.0122  | 0.0831  | 2.000  | 26.000  | 5.2640     | 27.0585  | act; pyruvate formate-lyase-activating enzyme                         |                         |    |    |   |   |
|          |                        |                      |         |         |        | 22.000  |            | 22.0000  |                                                                       |                         |    |    |   |   |
| SGO_1652 | -0.012                 | 7.118                | 0.0881  | 0.8335  | 13.000 | 28.500  | 34.2160    | 29.6602  | intracellular glycosyl hydrolase                                      |                         |    |    |   |   |
|          |                        |                      |         |         | 11.500 | 40.500  | 34.5093    | 40.5000  |                                                                       |                         |    |    |   |   |
| SGO_1653 | -2.355                 | 8.961                | 0.0004  | 0.0007  | 10.500 | 187.500 | 27.6360    | 195.1331 | trehalose PTS enzyme II                                               |                         |    |    |   |   |
|          |                        |                      |         |         | 19.500 | 217.000 | 58.5157    | 217.0000 |                                                                       |                         |    |    |   |   |
| SGO_1666 | -2.475                 | 6.630                | 0.0011  | 0.0038  | 3.500  | 33.500  | 9.2120     | 34.8638  | trkA; potassium uptake protein, Trk family                            |                         |    |    |   |   |
|          |                        |                      |         |         | 2.000  | 49.000  | 6.0016     | 49.0000  |                                                                       |                         |    |    |   |   |
| SGO_1669 | -0.722                 | 7.304                | 0.0063  | 0.0352  | 11.000 | 38.500  | 28.9520    | 40.0673  | ribosomal large subunit pseudouridine synthase B                      |                         |    |    |   |   |
|          |                        |                      |         |         | 10.000 | 59.000  | 30.0081    | 59.0000  |                                                                       |                         |    |    |   |   |
| SGO_1675 | -0.814                 | 6.224                | 0.0104  | 0.0676  | 4.000  | 17.500  | 10.5280    | 18.2124  | HAM1 protein-like protein                                             |                         |    |    |   |   |
|          |                        |                      |         |         | 5.500  | 29.500  | 16.5044    | 29.5000  |                                                                       |                         |    |    |   |   |

 Show detected proteins only Show all proteinsProteins found:  
624 Filter by category:

ABC Transporter

Test

Cutoff

q-Value

.005

p-Value

|             | Signif | Direction | Applies To   |
|-------------|--------|-----------|--------------|
| Red         | yes    | +         | ratios, bars |
| Yellow      | no     | n/a       | bars         |
| Green       | yes    | -         | ratios, bars |
| Pink        | yes    | +         | p-, q-Values |
| Light Green | yes    | -         | p-, q-Values |

Dot Plots Dot Plots

Summary Table

SgFn vs Sg

SgPg vs Sg

SgPgFn vs Sg

SgPg vs SgFn

SgPgFn vs SgFn

SgPgFn vs SgPg

Coverage

| Protein  | SgPgFn vs Sg           |                      |         |         | Raw    |         | Normalized |          | Description                                                       | Log <sub>2</sub> Ratios |    |    |   |   |   |   |
|----------|------------------------|----------------------|---------|---------|--------|---------|------------|----------|-------------------------------------------------------------------|-------------------------|----|----|---|---|---|---|
|          | Log <sub>2</sub> Ratio | Log <sub>2</sub> Sum | q-Value | p-Value | SgPgFn | Sg      | SgPgFn     | Sg       |                                                                   | -6                      | -4 | -2 | 0 | 2 | 4 | 6 |
| SGO_1676 | 1.047                  | 5.395                | 0.0034  | 0.0164  | 4.500  | 5.500   | 11.8440    | 5.7239   | murI; glutamate racemase                                          |                         |    |    |   |   |   |   |
|          |                        |                      |         |         | 5.500  | 8.000   | 16.5044    | 8.0000   |                                                                   |                         |    |    |   |   |   |   |
| SGO_1678 | -0.494                 | 4.666                | 0.0386  | 0.3278  | 2.500  | 7.500   | 6.5800     | 7.8053   | lysA; diaminopimelate decarboxylase                               |                         |    |    |   |   |   |   |
|          |                        |                      |         |         |        | 11.000  |            | 11.0000  |                                                                   |                         |    |    |   |   |   |   |
| SGO_1679 | -1.444                 | 10.749               | 0.0001  | 0.0000  | 82.000 | 608.000 | 215.8241   | 632.7514 | phosphotransferase system enzyme II                               |                         |    |    |   |   |   |   |
|          |                        |                      |         |         | 82.500 | 625.000 | 247.5666   | 625.0000 |                                                                   |                         |    |    |   |   |   |   |
| SGO_1680 | -1.867                 | 7.981                | 0.0139  | 0.0989  | 11.500 | 119.000 | 30.2680    | 123.8444 | phosphotransferase system enzyme II                               |                         |    |    |   |   |   |   |
|          |                        |                      |         |         |        | 98.500  |            | 98.5000  |                                                                   |                         |    |    |   |   |   |   |
| SGO_1681 | -1.822                 | 10.287               | 0.0001  | 0.0001  | 46.000 | 471.500 | 121.0721   | 490.6946 | PTS system, mannose/fructose/sorbose family, IID component        |                         |    |    |   |   |   |   |
|          |                        |                      |         |         | 52.000 | 481.500 | 156.0420   | 481.5000 |                                                                   |                         |    |    |   |   |   |   |
| SGO_1683 | 0.372                  | 8.211                | 0.0043  | 0.0219  | 34.500 | 59.500  | 90.8041    | 61.9222  | serS; seryl-tRNA synthetase                                       |                         |    |    |   |   |   |   |
|          |                        |                      |         |         | 25.500 | 67.000  | 76.5206    | 67.0000  |                                                                   |                         |    |    |   |   |   |   |
| SGO_1684 | 1.486                  | 6.497                | 0.0013  | 0.0044  | 11.000 | 9.500   | 28.9520    | 9.8867   | acyl-CoA dehydrogenase family                                     |                         |    |    |   |   |   |   |
|          |                        |                      |         |         | 12.500 | 14.000  | 37.5101    | 14.0000  |                                                                   |                         |    |    |   |   |   |   |
| SGO_1685 | 3.050                  | 8.386                | 0.0008  | 0.0023  | 65.500 | 14.500  | 172.3961   | 15.0903  | putative peroxidase / antioxidant                                 |                         |    |    |   |   |   |   |
|          |                        |                      |         |         | 42.000 | 21.000  | 126.0339   | 21.0000  |                                                                   |                         |    |    |   |   |   |   |
| SGO_1687 | 0.122                  | 8.112                | 0.0045  | 0.0231  | 28.000 | 62.000  | 73.6960    | 64.5240  | accA; acetyl-CoA carboxylase, carboxyl transferase, alpha subunit |                         |    |    |   |   |   |   |
|          |                        |                      |         |         | 23.500 | 68.000  | 70.5190    | 68.0000  |                                                                   |                         |    |    |   |   |   |   |
| SGO_1688 | -1.406                 | 6.366                | 0.0063  | 0.0357  | 5.000  | 20.500  | 13.1600    | 21.3345  | accD; acetyl-CoA carboxylase, carboxyl transferase, beta subunit  |                         |    |    |   |   |   |   |
|          |                        |                      |         |         | 3.000  | 39.000  | 9.0024     | 39.0000  |                                                                   |                         |    |    |   |   |   |   |
| SGO_1689 | 0.660                  | 7.554                | 0.0016  | 0.0063  | 22.500 | 30.500  | 59.2200    | 31.7416  | accC; acetyl-CoA carboxylase, biotin carboxylase                  |                         |    |    |   |   |   |   |
|          |                        |                      |         |         | 18.500 | 41.500  | 55.5149    | 41.5000  |                                                                   |                         |    |    |   |   |   |   |
| SGO_1691 | 0.766                  | 7.873                | 0.0089  | 0.0549  | 24.000 | 55.000  | 63.1680    | 57.2390  | accB; acetyl-CoA carboxylase, biotin carboxyl carrier protein     |                         |    |    |   |   |   |   |
|          |                        |                      |         |         | 27.500 | 31.500  | 82.5222    | 31.5000  |                                                                   |                         |    |    |   |   |   |   |

- Show detected proteins only
- Show all proteins

Proteins found:  
624

Filter by category:

ABC Transporter

Test

Cutoff

q-Value

.005

p-Value

|  | Signif | Direction | Applies To   |
|--|--------|-----------|--------------|
|  | yes    | +         | ratios, bars |
|  | no     | n/a       | bars         |
|  | yes    | -         | ratios, bars |
|  | yes    | +         | p-, q-Values |
|  | yes    | -         | p-, q-Values |

Dot Plots Dot Plots



Summary Table

SgFn vs Sg

SgPg vs Sg

SgPgFn vs Sg

SgPg vs SgFn

SgPgFn vs SgFn

SgPgFn vs SgPg

Coverage

SgPgFn vs Sg

Raw

Normalized

Log<sub>2</sub> Ratios

| Protein  | SgPgFn vs Sg           |                      |         |         | Raw     |         | Normalized |          | Description                                           | Log <sub>2</sub> Ratios |    |    |   |   |   |   |
|----------|------------------------|----------------------|---------|---------|---------|---------|------------|----------|-------------------------------------------------------|-------------------------|----|----|---|---|---|---|
|          | Log <sub>2</sub> Ratio | Log <sub>2</sub> Sum | q-Value | p-Value | SgPgFn  | Sg      | SgPgFn     | Sg       |                                                       | -6                      | -4 | -2 | 0 | 2 | 4 | 6 |
| SGO_1692 | 0.957                  | 9.329                | 0.0002  | 0.0002  | 78.000  | 101.000 | 205.2961   | 105.1117 | 3-oxoacyl-[acyl-carrier-protein] synthase             |                         |    |    |   |   |   |   |
|          |                        |                      |         |         | 73.000  | 113.500 | 219.0590   | 113.5000 |                                                       |                         |    |    |   |   |   |   |
| SGO_1693 | 0.329                  | 6.844                | 0.0297  | 0.2420  | 15.500  | 26.500  | 40.7960    | 27.5788  | fabG; 3-oxoacyl-(acyl-carrier-protein) reductase      |                         |    |    |   |   |   |   |
|          |                        |                      |         |         | 8.000   | 22.500  | 24.0065    | 22.5000  |                                                       |                         |    |    |   |   |   |   |
| SGO_1694 | 0.254                  | 6.757                | 0.0396  | 0.3378  | 14.000  | 20.000  | 36.8480    | 20.8142  | fabD; malonyl CoA-acyl carrier protein transacylase   |                         |    |    |   |   |   |   |
|          |                        |                      |         |         | 7.500   | 28.000  | 22.5061    | 28.0000  |                                                       |                         |    |    |   |   |   |   |
| SGO_1695 | 0.383                  | 9.478                | 0.0104  | 0.0673  | 88.500  | 147.500 | 232.9321   | 153.5047 | enoyl-acyl carrier protein(ACP) reductase             |                         |    |    |   |   |   |   |
|          |                        |                      |         |         | 57.500  | 154.000 | 172.5464   | 154.0000 |                                                       |                         |    |    |   |   |   |   |
| SGO_1699 | 0.250                  | 4.823                | 0.0440  | 0.3827  |         | 7.500   |            | 7.8053   | transcriptional regulator, MarR family                |                         |    |    |   |   |   |   |
|          |                        |                      |         |         | 3.500   | 10.000  | 10.5028    | 10.0000  |                                                       |                         |    |    |   |   |   |   |
| SGO_1700 | -1.156                 | 5.429                | 0.0016  | 0.0063  | 3.000   | 17.000  | 7.8960     | 17.6921  | enoyl-CoA hydratase/isomerase family protein          |                         |    |    |   |   |   |   |
|          |                        |                      |         |         |         | 17.500  |            | 17.5000  |                                                       |                         |    |    |   |   |   |   |
| SGO_1701 | 0.450                  | 7.536                | 0.0079  | 0.0461  | 17.500  | 36.500  | 46.0600    | 37.9859  | aspartate kinase                                      |                         |    |    |   |   |   |   |
|          |                        |                      |         |         | 20.500  | 40.000  | 61.5166    | 40.0000  |                                                       |                         |    |    |   |   |   |   |
| SGO_1708 | -1.843                 | 9.787                | 0.0037  | 0.0183  | 32.500  | 424.000 | 85.5400    | 441.2609 | amiF; Oligopeptide transport ATP-binding protein amiF |                         |    |    |   |   |   |   |
|          |                        |                      |         |         | 34.000  | 254.500 | 102.0275   | 254.5000 |                                                       |                         |    |    |   |   |   |   |
| SGO_1709 | -1.751                 | 10.017               | 0.0001  | 0.0001  | 39.000  | 381.500 | 102.6481   | 397.0307 | amiE; Oligopeptide transport ATP-binding protein      |                         |    |    |   |   |   |   |
|          |                        |                      |         |         | 45.500  | 400.000 | 136.5367   | 400.0000 |                                                       |                         |    |    |   |   |   |   |
| SGO_1710 | -1.800                 | 6.971                | 0.0002  | 0.0002  | 5.500   | 49.500  | 14.4760    | 51.5151  | amiD; Oligopeptide transport system permease protein  |                         |    |    |   |   |   |   |
|          |                        |                      |         |         | 4.500   | 46.000  | 13.5036    | 46.0000  |                                                       |                         |    |    |   |   |   |   |
| SGO_1711 | -1.236                 | 8.671                | 0.0013  | 0.0049  | 20.000  | 121.000 | 52.6400    | 125.9259 | hppB; Oligopeptide transport system permease          |                         |    |    |   |   |   |   |
|          |                        |                      |         |         | 23.000  | 160.000 | 69.0186    | 160.0000 |                                                       |                         |    |    |   |   |   |   |
| SGO_1712 | -0.769                 | 11.175               | 0.0001  | 0.0001  | 167.000 | 712.500 | 439.5443   | 741.5056 | hppA; oligopeptide-binding lipoprotein                |                         |    |    |   |   |   |   |
|          |                        |                      |         |         | 138.500 | 715.500 | 415.6119   | 715.5000 |                                                       |                         |    |    |   |   |   |   |

 Show detected proteins only Show all proteinsProteins found:  
624 Filter by category:

ABC Transporter

Test

Cutoff

q-Value

p-Value

.005

Signif

Direction

Applies To

|             |     |     |              |
|-------------|-----|-----|--------------|
| red         | yes | +   | ratios, bars |
| yellow      | no  | n/a | bars         |
| green       | yes | -   | ratios, bars |
| pink        | yes | +   | p-, q-Values |
| light green | yes | -   | p-, q-Values |

Dot Plots

Dot Plots

Summary Table SgFn vs Sg SgPg vs Sg SgPgFn vs Sg SgPg vs SgFn SgPgFn vs SgFn SgPgFn vs SgPg Coverage

| Protein  | SgPgFn vs Sg           |                      |         |         | Raw     |         | Normalized |          | Description                                                     | Log <sub>2</sub> Ratios |    |    |   |   |
|----------|------------------------|----------------------|---------|---------|---------|---------|------------|----------|-----------------------------------------------------------------|-------------------------|----|----|---|---|
|          | Log <sub>2</sub> Ratio | Log <sub>2</sub> Sum | q-Value | p-Value | SgPgFn  | Sg      | SgPgFn     | Sg       |                                                                 | -6                      | -4 | -2 | 0 | 2 |
| SGO_1713 | -1.142                 | 10.780               | 0.0003  | 0.0005  | 101.500 | 615.000 | 267.1482   | 640.0364 | hppG; oligopeptide-binding lipoprotein                          |                         |    |    |   |   |
|          |                        |                      |         |         | 93.500  | 570.500 | 280.5755   | 570.5000 |                                                                 |                         |    |    |   |   |
| SGO_1715 | -1.403                 | 9.537                | 0.0001  | 0.0000  | 36.500  | 263.500 | 96.0681    | 274.2270 | hppH; oligopeptide-binding lipoprotein                          |                         |    |    |   |   |
|          |                        |                      |         |         | 36.000  | 264.500 | 108.0291   | 264.5000 |                                                                 |                         |    |    |   |   |
| SGO_1716 | -0.817                 | 9.616                | 0.0059  | 0.0323  | 70.500  | 215.000 | 185.5561   | 223.7526 | oligopeptide binding protein                                    |                         |    |    |   |   |
|          |                        |                      |         |         | 35.000  | 270.500 | 105.0283   | 270.5000 |                                                                 |                         |    |    |   |   |
| SGO_1718 | -0.096                 | 7.275                | 0.0867  | 0.8195  | 10.500  | 31.000  | 27.6360    | 32.2620  | sufB-1; FeS assembly protein SufB                               |                         |    |    |   |   |
|          |                        |                      |         |         | 16.000  | 47.000  | 48.0129    | 47.0000  |                                                                 |                         |    |    |   |   |
| SGO_1720 | 0.593                  | 5.293                | 0.0194  | 0.1486  | 5.500   | 5.500   | 14.4760    | 5.7239   | aminotransferase, class-V                                       |                         |    |    |   |   |
|          |                        |                      |         |         | 3.000   | 10.000  | 9.0024     | 10.0000  |                                                                 |                         |    |    |   |   |
| SGO_1721 | 0.411                  | 7.324                | 0.0029  | 0.0128  | 17.000  | 36.500  | 44.7440    | 37.9859  | sufD; FeS assembly protein SufD                                 |                         |    |    |   |   |
|          |                        |                      |         |         | 15.500  | 31.000  | 46.5125    | 31.0000  |                                                                 |                         |    |    |   |   |
| SGO_1722 | 0.109                  | 6.599                | 0.0647  | 0.5864  | 6.500   | 19.500  | 17.1080    | 20.2938  | sufC; FeS assembly ATPase SufC                                  |                         |    |    |   |   |
|          |                        |                      |         |         | 11.500  | 25.000  | 34.5093    | 25.0000  |                                                                 |                         |    |    |   |   |
| SGO_1727 | -1.039                 | 7.688                | 0.0002  | 0.0003  | 12.000  | 64.500  | 31.5840    | 67.1258  | amino acid ABC transporter, amino acid-binding/permease protein |                         |    |    |   |   |
|          |                        |                      |         |         | 12.000  | 71.500  | 36.0097    | 71.5000  |                                                                 |                         |    |    |   |   |
| SGO_1728 | -1.188                 | 7.505                | 0.0032  | 0.0153  | 10.500  | 73.000  | 27.6360    | 75.9718  | glnQ; glutamine ABC transporter ATP-binding protein             |                         |    |    |   |   |
|          |                        |                      |         |         | 9.000   | 51.000  | 27.0073    | 51.0000  |                                                                 |                         |    |    |   |   |
| SGO_1730 | -1.177                 | 9.659                | 0.0006  | 0.0016  | 45.000  | 292.500 | 118.4401   | 304.4076 | SPFH domain/Band 7 family                                       |                         |    |    |   |   |
|          |                        |                      |         |         | 43.000  | 256.500 | 129.0347   | 256.5000 |                                                                 |                         |    |    |   |   |
| SGO_1731 | 2.608                  | 5.540                | 0.0004  | 0.0007  | 7.000   | 2.000   | 18.4240    | 2.0814   | DNA-binding response regulator                                  |                         |    |    |   |   |
|          |                        |                      |         |         | 7.000   | 5.000   | 21.0057    | 5.0000   |                                                                 |                         |    |    |   |   |
| SGO_1735 | -0.245                 | 9.332                | 0.0086  | 0.0525  | 59.000  | 155.500 | 155.2881   | 161.8303 | hypothetical protein SGO_1735                                   |                         |    |    |   |   |
|          |                        |                      |         |         | 46.500  | 188.000 | 139.5376   | 188.0000 |                                                                 |                         |    |    |   |   |

Show detected proteins only  
 Show all proteins  
 Filter by category:

Proteins found: 624

**Test**      **Cutoff**  
     

|             | Signif | Direction | Applies To   |
|-------------|--------|-----------|--------------|
| Red         | yes    | +         | ratios, bars |
| Yellow      | no     | n/a       | bars         |
| Green       | yes    | -         | ratios, bars |
| Pink        | yes    | +         | p-, q-Values |
| Light Green | yes    | -         | p-, q-Values |

Dot Plots  Dot Plots

Summary Table SgFn vs Sg SgPg vs Sg SgPgFn vs Sg SgPg vs SgFn SgPgFn vs SgFn SgPgFn vs SgPg Coverage

| Protein  | SgPgFn vs Sg           |                      |         |         | Raw     |         | Normalized |          | Description                                                 | Log <sub>2</sub> Ratios |    |    |   |   |   |   |
|----------|------------------------|----------------------|---------|---------|---------|---------|------------|----------|-------------------------------------------------------------|-------------------------|----|----|---|---|---|---|
|          | Log <sub>2</sub> Ratio | Log <sub>2</sub> Sum | q-Value | p-Value | SgPgFn  | Sg      | SgPgFn     | Sg       |                                                             | -6                      | -4 | -2 | 0 | 2 | 4 | 6 |
| SGO_1736 | -0.151                 | 5.089                | 0.0568  | 0.5072  | 4.000   | 12.500  | 10.5280    | 13.0089  | alkaline shock protein                                      |                         |    |    |   |   |   |   |
| SGO_1737 | 2.134                  | 7.515                | 0.0078  | 0.0454  |         | 21.500  |            | 22.3753  | rpmB; ribosomal protein L28                                 |                         |    |    |   |   |   |   |
| SGO_1745 | 1.424                  | 12.436               | 0.0013  | 0.0044  | 665.500 | 810.500 | 1751.5970  | 843.4951 | fba; fructose-1,6-bisphosphate aldolase, class II           |                         |    |    |   |   |   |   |
| SGO_1748 | 0.167                  | 5.622                | 0.0423  | 0.3624  | 6.000   | 11.500  | 15.7920    | 11.9682  | pyrG; CTP synthase                                          |                         |    |    |   |   |   |   |
| SGO_1749 | -0.386                 | 6.448                | 0.0200  | 0.1552  | 8.000   | 19.000  | 21.0560    | 19.7735  | manA; mannose-6-phosphate isomerase, class I                |                         |    |    |   |   |   |   |
| SGO_1755 | 0.304                  | 7.053                | 0.0095  | 0.0602  | 13.000  | 25.500  | 34.2160    | 26.5381  | scrK; fructokinase                                          |                         |    |    |   |   |   |   |
| SGO_1757 | -0.347                 | 8.518                | 0.0137  | 0.0974  | 28.000  | 84.500  | 73.6960    | 87.9400  | glmS; glucosamine--fructose-6-phosphate aminotransferase    |                         |    |    |   |   |   |   |
| SGO_1763 | 0.099                  | 7.963                | 0.0335  | 0.2787  | 25.000  | 53.000  | 65.8000    | 55.1576  | ABC transporter, substrate-binding protein SP0092           |                         |    |    |   |   |   |   |
| SGO_1774 | 0.393                  | 5.898                | 0.0210  | 0.1646  | 5.000   | 11.000  | 13.1600    | 11.4478  | alcohol dehydrogenase, zinc-containing                      |                         |    |    |   |   |   |   |
| SGO_1784 | 0.812                  | 8.516                | 0.0005  | 0.0011  | 44.000  | 57.500  | 115.8081   | 59.8408  | leuS; leucyl-tRNA synthetase                                |                         |    |    |   |   |   |   |
| SGO_1799 | 0.779                  | 8.359                | 0.0031  | 0.0142  | 44.000  | 50.500  | 115.8081   | 52.5558  | endopeptidase O                                             |                         |    |    |   |   |   |   |
| SGO_1800 | -2.837                 | 8.327                | 0.0003  | 0.0005  | 6.500   | 147.500 | 17.1080    | 153.5047 | troB; manganese ABC transporter, ATP-binding protein SP1648 |                         |    |    |   |   |   |   |

Show detected proteins only  
 Show all proteins

Proteins found: 624

Filter by category:

**Test** **Cutoff**

| Signif | Direction | Applies To   |
|--------|-----------|--------------|
| yes    | +         | ratios, bars |
| no     | n/a       | bars         |
| yes    | -         | ratios, bars |
| yes    | +         | p-, q-Values |
| yes    | -         | p-, q-Values |

Summary Table

SgFn vs Sg

SgPg vs Sg

SgPgFn vs Sg

SgPg vs SgFn

SgPgFn vs SgFn

SgPgFn vs SgPg

Coverage

| Protein  | SgPgFn vs Sg           |                      |         |         | Raw    |          | Normalized |           | Description                                                   | Log <sub>2</sub> Ratios |    |    |   |   |
|----------|------------------------|----------------------|---------|---------|--------|----------|------------|-----------|---------------------------------------------------------------|-------------------------|----|----|---|---|
|          | Log <sub>2</sub> Ratio | Log <sub>2</sub> Sum | q-Value | p-Value | SgPgFn | Sg       | SgPgFn     | Sg        |                                                               | -6                      | -4 | -2 | 0 | 2 |
| SGO_1802 | -3.417                 | 11.160               | 0.0003  | 0.0003  | 43.000 | 1088.500 | 113.1761   | 1132.8124 | Metal ABC transporter substrate-binding lipoprotein precursor |                         |    |    |   |   |
|          |                        |                      |         |         | 28.000 | 958.000  | 84.0226    | 958.0000  |                                                               |                         |    |    |   |   |
| SGO_1803 | 1.530                  | 6.761                | 0.0021  | 0.0088  | 12.500 | 13.000   | 32.9000    | 13.5292   | tpx; thioredoxin peroxidase                                   |                         |    |    |   |   |
|          |                        |                      |         |         | 16.000 | 14.000   | 48.0129    | 14.0000   |                                                               |                         |    |    |   |   |
| SGO_1805 | 3.472                  | 5.269                | 0.0288  | 0.2332  | 9.500  | 1.500    | 25.0040    | 1.5611    | hutU; urocanate hydratase                                     |                         |    |    |   |   |
|          |                        |                      |         |         | 4.000  |          | 12.0032    |           |                                                               |                         |    |    |   |   |
| SGO_1811 | 0.311                  | 3.971                | 0.0125  | 0.0864  |        | 4.500    |            | 4.6832    | hutH; histidine ammonia-lyase                                 |                         |    |    |   |   |
|          |                        |                      |         |         | 2.000  | 5.000    | 6.0016     | 5.0000    |                                                               |                         |    |    |   |   |
| SGO_1822 | -1.916                 | 6.495                | 0.0097  | 0.0614  | 4.000  | 41.000   | 10.5280    | 42.6691   | relA; GTP diphosphokinase                                     |                         |    |    |   |   |
|          |                        |                      |         |         |        | 37.000   |            | 37.0000   |                                                               |                         |    |    |   |   |
| SGO_1824 | 0.344                  | 5.781                | 0.0208  | 0.1628  | 6.500  | 9.500    | 17.1080    | 9.8867    | prmA; ribosomal protein L11 methyltransferase                 |                         |    |    |   |   |
|          |                        |                      |         |         | 4.500  | 14.500   | 13.5036    | 14.5000   |                                                               |                         |    |    |   |   |
| SGO_1828 | 0.528                  | 4.191                | 0.0428  | 0.3679  |        | 6.500    |            | 6.7646    | ATPase, AAA family                                            |                         |    |    |   |   |
|          |                        |                      |         |         | 2.500  | 4.000    | 7.5020     | 4.0000    |                                                               |                         |    |    |   |   |
| SGO_1834 | 3.228                  | 6.972                | 0.0001  | 0.0001  | 22.500 | 7.000    | 59.2200    | 7.2850    | hypothetical protein SGO_1834                                 |                         |    |    |   |   |
|          |                        |                      |         |         | 18.000 | 5.000    | 54.0145    | 5.0000    |                                                               |                         |    |    |   |   |
| SGO_1835 | 2.701                  | 4.492                |         |         |        |          |            |           | hypothetical protein SGO_1835                                 |                         |    |    |   |   |
|          |                        |                      |         |         | 6.500  | 3.000    | 19.5052    | 3.0000    |                                                               |                         |    |    |   |   |
| SGO_1843 | 0.922                  | 8.025                | 0.0010  | 0.0032  | 29.500 | 45.500   | 77.6440    | 47.3523   | pepS; aminopeptidase PepS                                     |                         |    |    |   |   |
|          |                        |                      |         |         | 31.000 | 42.500   | 93.0250    | 42.5000   |                                                               |                         |    |    |   |   |
| SGO_1844 | -0.266                 | 5.225                | 0.0432  | 0.3728  | 2.500  | 8.000    | 6.5800     | 8.3257    | cbxX/cfqX family protein                                      |                         |    |    |   |   |
|          |                        |                      |         |         | 3.500  | 12.000   | 10.5028    | 12.0000   |                                                               |                         |    |    |   |   |
| SGO_1847 | -0.806                 | 5.342                | 0.0155  | 0.1128  |        | 14.000   |            | 14.5699   | polC; DNA polymerase III, alpha subunit, Gram-positive type   |                         |    |    |   |   |
|          |                        |                      |         |         | 3.000  | 17.000   | 9.0024     | 17.0000   |                                                               |                         |    |    |   |   |

Show detected proteins only  
 Show all proteins  
 Filter by category:

Proteins found: 624

**Test**      **Cutoff**  
     

|  | Signif | Direction | Applies To   |
|--|--------|-----------|--------------|
|  | yes    | +         | ratios, bars |
|  | no     | n/a       | bars         |
|  | yes    | -         | ratios, bars |
|  | yes    | +         | p-, q-Values |
|  | yes    | -         | p-, q-Values |

[Dot Plots](#)

Summary Table SgFn vs Sg SgPg vs Sg SgPgFn vs Sg SgPg vs SgFn SgPgFn vs SgFn SgPgFn vs SgPg Coverage

| Protein  | SgPgFn vs Sg           |                      |         |         | Raw    |         | Normalized |          | Description                                        | Log <sub>2</sub> Ratios |    |    |   |   |
|----------|------------------------|----------------------|---------|---------|--------|---------|------------|----------|----------------------------------------------------|-------------------------|----|----|---|---|
|          | Log <sub>2</sub> Ratio | Log <sub>2</sub> Sum | q-Value | p-Value | SgPgFn | Sg      | SgPgFn     | Sg       |                                                    | -6                      | -4 | -2 | 0 | 2 |
| SGO_1848 | -3.131                 | 7.451                | 0.0003  | 0.0006  | 2.500  | 82.000  | 6.5800     | 85.3382  | lipoprotein, putative                              |                         |    |    |   |   |
|          |                        |                      |         |         | 4.000  | 71.000  | 12.0032    | 71.0000  |                                                    |                         |    |    |   |   |
| SGO_1851 | 0.354                  | 8.954                | 0.0037  | 0.0181  | 55.500 | 96.500  | 146.0761   | 100.4285 | proS; prolyl-tRNA synthetase                       |                         |    |    |   |   |
|          |                        |                      |         |         | 44.000 | 117.500 | 132.0355   | 117.5000 |                                                    |                         |    |    |   |   |
| SGO_1852 | -1.808                 | 6.568                | 0.0073  | 0.0423  | 4.500  | 38.000  | 11.8440    | 39.5470  | membrane-associated zinc metalloprotease, putative |                         |    |    |   |   |
|          |                        |                      |         |         |        | 43.500  |            | 43.5000  |                                                    |                         |    |    |   |   |
| SGO_1854 | -1.185                 | 7.051                | 0.0011  | 0.0035  | 6.000  | 45.500  | 15.7920    | 47.3523  | uppS; undecaprenyl diphosphate synthase            |                         |    |    |   |   |
|          |                        |                      |         |         | 8.500  | 44.000  | 25.5069    | 44.0000  |                                                    |                         |    |    |   |   |
| SGO_1856 | -0.872                 | 6.771                | 0.0009  | 0.0027  | 8.500  | 33.500  | 22.3720    | 34.8638  | ATP-dependent proteinase ATP-binding chain         |                         |    |    |   |   |
|          |                        |                      |         |         | 5.500  | 35.500  | 16.5044    | 35.5000  |                                                    |                         |    |    |   |   |
| SGO_1860 | -1.747                 | 8.928                | 0.0009  | 0.0028  | 19.500 | 204.500 | 51.3240    | 212.8251 | 5'-nucleotidase, lipoprotein e(P4) family          |                         |    |    |   |   |
|          |                        |                      |         |         | 20.000 | 163.000 | 60.0162    | 163.0000 |                                                    |                         |    |    |   |   |
| SGO_1861 | 0.305                  | 3.026                |         |         |        | 3.500   |            | 3.6425   | nusB; transcription antitermination factor NusB    |                         |    |    |   |   |
|          |                        |                      |         |         | 1.500  |         | 4.5012     |          |                                                    |                         |    |    |   |   |
| SGO_1862 | 1.008                  | 6.883                | 0.0004  | 0.0008  | 14.500 | 21.000  | 38.1640    | 21.8549  | alkaline shock protein                             |                         |    |    |   |   |
|          |                        |                      |         |         | 13.500 | 17.500  | 40.5109    | 17.5000  |                                                    |                         |    |    |   |   |
| SGO_1863 | 0.360                  | 8.507                | 0.0017  | 0.0065  | 40.000 | 72.000  | 105.2801   | 74.9311  | efp; Elongation factor P (EF-P)                    |                         |    |    |   |   |
|          |                        |                      |         |         | 33.000 | 84.500  | 99.0267    | 84.5000  |                                                    |                         |    |    |   |   |
| SGO_1864 | 0.554                  | 7.258                | 0.0189  | 0.1444  | 22.500 | 33.500  | 59.2200    | 34.8638  | X-Pro aminopeptidase                               |                         |    |    |   |   |
|          |                        |                      |         |         | 11.000 | 26.000  | 33.0089    | 26.0000  |                                                    |                         |    |    |   |   |
| SGO_1865 | -1.655                 | 7.125                | 0.0002  | 0.0001  | 6.500  | 48.500  | 17.1080    | 50.4744  | uvrA; excinuclease ABC, A subunit                  |                         |    |    |   |   |
|          |                        |                      |         |         | 5.500  | 55.500  | 16.5044    | 55.5000  |                                                    |                         |    |    |   |   |
| SGO_1867 | -0.450                 | 8.165                | 0.0084  | 0.0500  | 27.000 | 85.000  | 71.0640    | 88.4603  | hypothetical protein SGO_1867                      |                         |    |    |   |   |
|          |                        |                      |         |         | 17.000 | 76.500  | 51.0137    | 76.5000  |                                                    |                         |    |    |   |   |

Show detected proteins only  
 Show all proteins

Proteins found: 624

Filter by category:

**Test** **Cutoff**

| Signif | Direction | Applies To   |
|--------|-----------|--------------|
| yes    | +         | ratios, bars |
| no     | n/a       | bars         |
| yes    | -         | ratios, bars |
| yes    | +         | p-, q-Values |
| yes    | -         | p-, q-Values |

Summary Table

SgFn vs Sg

SgPg vs Sg

SgPgFn vs Sg

SgPg vs SgFn

SgPgFn vs SgFn

SgPgFn vs SgPg

Coverage

SgPgFn vs Sg

Raw

Normalized

Log<sub>2</sub> Ratios

| Protein  | SgPgFn vs Sg           |                      |         |         | Raw     |         | Normalized |          | Description                                | Log <sub>2</sub> Ratios |    |    |   |   |   |   |
|----------|------------------------|----------------------|---------|---------|---------|---------|------------|----------|--------------------------------------------|-------------------------|----|----|---|---|---|---|
|          | Log <sub>2</sub> Ratio | Log <sub>2</sub> Sum | q-Value | p-Value | SgPgFn  | Sg      | SgPgFn     | Sg       |                                            | -6                      | -4 | -2 | 0 | 2 | 4 | 6 |
| SGO_1879 | 0.700                  | 7.966                | 0.0195  | 0.1505  | 27.500  | 28.000  | 72.3800    | 29.1399  | rpsR; ribosomal protein S18                |                         |    |    |   |   |   |   |
|          |                        |                      |         |         | 25.500  | 72.000  | 76.5206    | 72.0000  |                                            |                         |    |    |   |   |   |   |
| SGO_1880 | 0.689                  | 8.219                | 0.0009  | 0.0027  | 35.500  | 49.000  | 93.4361    | 50.9948  | ssb-1; single-strand binding protein       |                         |    |    |   |   |   |   |
|          |                        |                      |         |         | 30.000  | 63.500  | 90.0242    | 63.5000  |                                            |                         |    |    |   |   |   |   |
| SGO_1881 | 0.575                  | 9.632                | 0.0010  | 0.0031  | 95.500  | 146.500 | 251.3561   | 152.4640 | rpsF; ribosomal protein S6                 |                         |    |    |   |   |   |   |
|          |                        |                      |         |         | 74.500  | 166.000 | 223.5602   | 166.0000 |                                            |                         |    |    |   |   |   |   |
| SGO_1882 | 0.473                  | 5.296                | 0.0155  | 0.1125  | 4.000   | 6.000   | 10.5280    | 6.2443   | foIE; GTP cyclohydrolase I                 |                         |    |    |   |   |   |   |
|          |                        |                      |         |         | 4.000   | 10.500  | 12.0032    | 10.5000  |                                            |                         |    |    |   |   |   |   |
| SGO_1885 | 0.330                  | 9.842                | 0.0005  | 0.0013  | 94.500  | 198.500 | 248.7241   | 206.5809 | groL; 60 kDa chaperonin/groEL protein      |                         |    |    |   |   |   |   |
|          |                        |                      |         |         | 87.500  | 200.000 | 262.5707   | 200.0000 |                                            |                         |    |    |   |   |   |   |
| SGO_1886 | -0.907                 | 5.912                | 0.0036  | 0.0171  | 3.000   | 20.000  | 7.8960     | 20.8142  | groES; chaperonin, 10 kDa                  |                         |    |    |   |   |   |   |
|          |                        |                      |         |         | 4.500   | 18.000  | 13.5036    | 18.0000  |                                            |                         |    |    |   |   |   |   |
| SGO_1892 | -0.914                 | 6.496                | 0.0045  | 0.0231  | 7.500   | 24.500  | 19.7400    | 25.4974  | PTS system, fructose(mannose)-specific IIB |                         |    |    |   |   |   |   |
|          |                        |                      |         |         | 4.000   | 33.000  | 12.0032    | 33.0000  |                                            |                         |    |    |   |   |   |   |
| SGO_1898 | 0.145                  | 7.601                | 0.0155  | 0.1136  | 20.500  | 42.000  | 53.9560    | 43.7098  | glutamyl aminopeptidase                    |                         |    |    |   |   |   |   |
|          |                        |                      |         |         | 16.000  | 48.500  | 48.0129    | 48.5000  |                                            |                         |    |    |   |   |   |   |
| SGO_1901 | 0.799                  | 6.435                | 0.0009  | 0.0026  | 10.000  | 17.000  | 26.3200    | 17.6921  | tRNA binding domain                        |                         |    |    |   |   |   |   |
|          |                        |                      |         |         | 9.500   | 14.000  | 28.5077    | 14.0000  |                                            |                         |    |    |   |   |   |   |
| SGO_1902 | 0.981                  | 9.865                | 0.0016  | 0.0059  | 131.000 | 137.000 | 344.7922   | 142.5772 | ssb; single-stranded DNA-binding protein   |                         |    |    |   |   |   |   |
|          |                        |                      |         |         | 91.500  | 170.500 | 274.5739   | 170.5000 |                                            |                         |    |    |   |   |   |   |
| SGO_1903 | 0.042                  | 8.146                | 0.0725  | 0.6714  | 24.000  | 64.000  | 63.1680    | 66.6054  | ATP-dependent Zn protease                  |                         |    |    |   |   |   |   |
|          |                        |                      |         |         | 27.000  | 72.500  | 81.0218    | 72.5000  |                                            |                         |    |    |   |   |   |   |
| SGO_1914 | 1.000                  | 3.170                |         |         |         |         |            |          | foIP; dihydropteroate synthase             |                         |    |    |   |   |   |   |
|          |                        |                      |         |         | 2.000   | 3.000   | 6.0016     | 3.0000   |                                            |                         |    |    |   |   |   |   |

- Show detected proteins only  
 Show all proteins

Proteins found:  
624

Filter by category:

ABC Transporter

Test

Cutoff

q-Value

.005

p-Value

|             | Signif | Direction | Applies To   |
|-------------|--------|-----------|--------------|
| Red         | yes    | +         | ratios, bars |
| Yellow      | no     | n/a       | bars         |
| Green       | yes    | -         | ratios, bars |
| Pink        | yes    | +         | p-, q-Values |
| Light Green | yes    | -         | p-, q-Values |

Dot Plots Dot Plots

Summary Table SgFn vs Sg SgPg vs Sg SgPgFn vs Sg SgPg vs SgFn SgPgFn vs SgFn SgPgFn vs SgPg Coverage

| Protein  | SgPgFn vs Sg           |                      |         |         | Raw     |         | Normalized |          | Description                                              | Log <sub>2</sub> Ratios |    |    |   |   |
|----------|------------------------|----------------------|---------|---------|---------|---------|------------|----------|----------------------------------------------------------|-------------------------|----|----|---|---|
|          | Log <sub>2</sub> Ratio | Log <sub>2</sub> Sum | q-Value | p-Value | SgPgFn  | Sg      | SgPgFn     | Sg       |                                                          | -6                      | -4 | -2 | 0 | 2 |
| SGO_1916 | 0.287                  | 8.469                | 0.0046  | 0.0243  | 38.000  | 70.500  | 100.0161   | 73.3700  | ackA; acetate kinase                                     |                         |    |    |   |   |
|          |                        |                      |         |         | 31.500  | 86.500  | 94.5254    | 86.5000  |                                                          |                         |    |    |   |   |
| SGO_1917 | 1.025                  | 5.153                | 0.0001  | 0.0001  | 4.500   | 6.000   | 11.8440    | 6.2443   | hypothetical protein SGO_1917                            |                         |    |    |   |   |
|          |                        |                      |         |         | 4.000   | 5.500   | 12.0032    | 5.5000   |                                                          |                         |    |    |   |   |
| SGO_1924 | -2.489                 | 8.495                | 0.0001  | 0.0001  | 8.500   | 142.000 | 22.3720    | 147.7808 | comYA; competence protein comYA                          |                         |    |    |   |   |
|          |                        |                      |         |         | 11.000  | 157.500 | 33.0089    | 157.5000 |                                                          |                         |    |    |   |   |
| SGO_1926 | 0.220                  | 10.594               | 0.0018  | 0.0071  | 153.500 | 333.500 | 404.0122   | 347.0767 | rpoC; DNA-directed RNA polymerase, beta chain            |                         |    |    |   |   |
|          |                        |                      |         |         | 142.500 | 367.000 | 427.6151   | 367.0000 |                                                          |                         |    |    |   |   |
| SGO_1927 | 0.140                  | 10.512               | 0.0173  | 0.1287  | 135.500 | 347.000 | 356.6362   | 361.1262 | rpoB; DNA-directed RNA polymerase, beta subunit          |                         |    |    |   |   |
|          |                        |                      |         |         | 136.500 | 333.000 | 409.6102   | 333.0000 |                                                          |                         |    |    |   |   |
| SGO_1928 | -3.385                 | 7.438                | 0.0087  | 0.0531  | 3.000   | 73.500  | 7.8960     | 76.4922  | pbp1b; penicillin-binding protein 1B                     |                         |    |    |   |   |
|          |                        |                      |         |         |         | 89.000  |            | 89.0000  |                                                          |                         |    |    |   |   |
| SGO_1929 | 0.438                  | 8.971                | 0.0031  | 0.0143  | 50.500  | 97.000  | 132.9161   | 100.9488 | tyrS; tyrosyl-tRNA synthetase                            |                         |    |    |   |   |
|          |                        |                      |         |         | 52.000  | 112.000 | 156.0420   | 112.0000 |                                                          |                         |    |    |   |   |
| SGO_1934 | -1.691                 | 5.485                | 0.0037  | 0.0184  |         | 19.000  |            | 19.7735  | copper-translocating P-type ATPase                       |                         |    |    |   |   |
|          |                        |                      |         |         | 2.000   | 19.000  | 6.0016     | 19.0000  |                                                          |                         |    |    |   |   |
| SGO_1936 | -2.739                 | 8.890                | 0.0001  | 0.0000  | 10.500  | 193.500 | 27.6360    | 201.3773 | adcA; metal-binding (Mn) permease precursor, lipoprotein |                         |    |    |   |   |
|          |                        |                      |         |         | 11.500  | 211.000 | 34.5093    | 211.0000 |                                                          |                         |    |    |   |   |
| SGO_1958 | 1.594                  | 9.873                | 0.0005  | 0.0012  | 122.500 | 127.000 | 322.4202   | 132.1701 | rplQ; ribosomal protein L17                              |                         |    |    |   |   |
|          |                        |                      |         |         | 127.000 | 102.000 | 381.1026   | 102.0000 |                                                          |                         |    |    |   |   |
| SGO_1959 | 0.337                  | 9.318                | 0.0063  | 0.0352  | 66.000  | 152.000 | 173.7121   | 158.1879 | rpoA; DNA-directed RNA polymerase, alpha subunit         |                         |    |    |   |   |
|          |                        |                      |         |         | 60.500  | 125.000 | 181.5489   | 125.0000 |                                                          |                         |    |    |   |   |
| SGO_1960 | 0.585                  | 8.257                | 0.0012  | 0.0041  | 36.000  | 64.500  | 94.7521    | 67.1258  | rpsK; ribosomal protein S11                              |                         |    |    |   |   |
|          |                        |                      |         |         | 29.500  | 55.500  | 88.5238    | 55.5000  |                                                          |                         |    |    |   |   |

Show detected proteins only  
 Show all proteins  
 Filter by category:

Proteins found: 624

**Test**      **Cutoff**  
     

| Signif | Direction | Applies To   |
|--------|-----------|--------------|
| yes    | +         | ratios, bars |
| no     | n/a       | bars         |
| yes    | -         | ratios, bars |
| yes    | +         | p-, q-Values |
| yes    | -         | p-, q-Values |

Summary Table SgFn vs Sg SgPg vs Sg SgPgFn vs Sg SgPg vs SgFn SgPgFn vs SgFn SgPgFn vs SgPg Coverage

| Protein  | SgPgFn vs Sg           |                      |         |         | Raw     |         | Normalized |          | Description                                        | Log <sub>2</sub> Ratios |    |    |   |   |   |
|----------|------------------------|----------------------|---------|---------|---------|---------|------------|----------|----------------------------------------------------|-------------------------|----|----|---|---|---|
|          | Log <sub>2</sub> Ratio | Log <sub>2</sub> Sum | q-Value | p-Value | SgPgFn  | Sg      | SgPgFn     | Sg       |                                                    | -6                      | -4 | -2 | 0 | 2 | 4 |
| SGO_1961 | 0.380                  | 9.056                | 0.0015  | 0.0056  | 54.500  | 115.500 | 143.4441   | 120.2020 | rpsM; ribosomal protein S13p/S18e                  |                         |    |    |   |   |   |
|          |                        |                      |         |         | 52.500  | 111.000 | 157.5424   | 111.0000 |                                                    |                         |    |    |   |   |   |
| SGO_1964 | 0.431                  | 8.993                | 0.0013  | 0.0045  | 52.500  | 106.500 | 138.1801   | 110.8356 | adk; Adenylate kinase (ATP-AMP transphosphorylase) |                         |    |    |   |   |   |
|          |                        |                      |         |         | 51.500  | 106.000 | 154.5416   | 106.0000 |                                                    |                         |    |    |   |   |   |
| SGO_1965 | -1.253                 | 6.773                | 0.0003  | 0.0003  | 6.000   | 39.000  | 15.7920    | 40.5877  | Preprotein translocase secY subunit                |                         |    |    |   |   |   |
|          |                        |                      |         |         | 5.500   | 36.500  | 16.5044    | 36.5000  |                                                    |                         |    |    |   |   |   |
| SGO_1966 | 1.278                  | 8.907                | 0.0009  | 0.0028  | 57.500  | 64.500  | 151.3401   | 67.1258  | rplO; ribosomal protein L15                        |                         |    |    |   |   |   |
|          |                        |                      |         |         | 63.000  | 72.500  | 189.0509   | 72.5000  |                                                    |                         |    |    |   |   |   |
| SGO_1967 | 0.975                  | 8.055                | 0.0016  | 0.0058  | 29.500  | 42.000  | 77.6440    | 43.7098  | 50S ribosomal protein L30 -related protein         |                         |    |    |   |   |   |
|          |                        |                      |         |         | 33.000  | 45.500  | 99.0267    | 45.5000  |                                                    |                         |    |    |   |   |   |
| SGO_1968 | 0.201                  | 10.039               | 0.0195  | 0.1505  | 110.500 | 264.500 | 290.8362   | 275.2677 | rpsE; ribosomal protein S5                         |                         |    |    |   |   |   |
|          |                        |                      |         |         | 90.000  | 216.000 | 270.0727   | 216.0000 |                                                    |                         |    |    |   |   |   |
| SGO_1969 | 1.285                  | 10.176               | 0.0002  | 0.0003  | 156.500 | 182.000 | 411.9082   | 189.4092 | rplR; ribosomal protein L18                        |                         |    |    |   |   |   |
|          |                        |                      |         |         | 135.500 | 149.000 | 406.6094   | 149.0000 |                                                    |                         |    |    |   |   |   |
| SGO_1970 | -0.307                 | 10.335               | 0.0120  | 0.0805  | 126.500 | 349.000 | 332.9482   | 363.2077 | BL10; 50S ribosomal protein L6                     |                         |    |    |   |   |   |
|          |                        |                      |         |         | 82.500  | 347.500 | 247.5666   | 347.5000 |                                                    |                         |    |    |   |   |   |
| SGO_1971 | 1.268                  | 11.111               | 0.0015  | 0.0056  | 339.500 | 326.500 | 893.5645   | 339.7917 | rpsH; ribosomal protein S8                         |                         |    |    |   |   |   |
|          |                        |                      |         |         | 224.500 | 305.500 | 673.6813   | 305.5000 |                                                    |                         |    |    |   |   |   |
| SGO_1973 | 0.582                  | 10.121               | 0.0019  | 0.0079  | 137.500 | 202.500 | 361.9002   | 210.7437 | BL6; 50S ribosomal protein L5                      |                         |    |    |   |   |   |
|          |                        |                      |         |         | 102.000 | 234.500 | 306.0824   | 234.5000 |                                                    |                         |    |    |   |   |   |
| SGO_1974 | 0.659                  | 9.413                | 0.0039  | 0.0194  | 71.500  | 147.000 | 188.1881   | 152.9843 | rplX; ribosomal protein L24                        |                         |    |    |   |   |   |
|          |                        |                      |         |         | 76.000  | 112.500 | 228.0614   | 112.5000 |                                                    |                         |    |    |   |   |   |
| SGO_1975 | 1.293                  | 9.123                | 0.0005  | 0.0012  | 69.000  | 80.500  | 181.6081   | 83.7771  | rplN; ribosomal protein L14                        |                         |    |    |   |   |   |
|          |                        |                      |         |         | 71.500  | 77.500  | 214.5577   | 77.5000  |                                                    |                         |    |    |   |   |   |

Show detected proteins only  
 Show all proteins  
 Filter by category:

Proteins found: 624

**Test**      **Cutoff**  
     

|             | Signif | Direction | Applies To   |
|-------------|--------|-----------|--------------|
| Red         | yes    | +         | ratios, bars |
| Yellow      | no     | n/a       | bars         |
| Green       | yes    | -         | ratios, bars |
| Pink        | yes    | +         | p-, q-Values |
| Light Green | yes    | -         | p-, q-Values |

[Dot Plots](#)



Summary Table

SgFn vs Sg

SgPg vs Sg

SgPgFn vs Sg

SgPg vs SgFn

SgPgFn vs SgFn

SgPgFn vs SgPg

Coverage

SgPgFn vs Sg

Raw

Normalized

Log<sub>2</sub> Ratios

| Protein  | SgPgFn vs Sg           |                      |         |         | Raw     |         |          |          | Normalized                           |    |        |    | Description | Log <sub>2</sub> Ratios |    |    |    |    |   |   |
|----------|------------------------|----------------------|---------|---------|---------|---------|----------|----------|--------------------------------------|----|--------|----|-------------|-------------------------|----|----|----|----|---|---|
|          | Log <sub>2</sub> Ratio | Log <sub>2</sub> Sum | q-Value | p-Value | SgPgFn  | Sg      | SgPgFn   | Sg       | SgPgFn                               | Sg | SgPgFn | Sg |             | SgPgFn                  | Sg | -6 | -4 | -2 | 0 | 2 |
| SGO_1976 | 1.712                  | 8.214                | 0.0030  | 0.0137  | 51.500  | 45.500  | 135.5481 | 47.3523  | BS16; 30S ribosomal protein          |    |        |    |             |                         |    |    |    |    |   |   |
|          |                        |                      |         |         | 30.000  | 24.000  | 90.0242  | 24.0000  |                                      |    |        |    |             |                         |    |    |    |    |   |   |
| SGO_1977 | 0.375                  | 6.717                | 0.0222  | 0.1763  | 9.000   | 25.000  | 23.6880  | 26.0177  | rpmC; ribosomal protein L29          |    |        |    |             |                         |    |    |    |    |   |   |
|          |                        |                      |         |         | 12.000  | 19.500  | 36.0097  | 19.5000  |                                      |    |        |    |             |                         |    |    |    |    |   |   |
| SGO_1978 | 0.912                  | 8.468                | 0.0040  | 0.0201  | 42.500  | 42.500  | 111.8601 | 44.2302  | rplP; ribosomal protein L16          |    |        |    |             |                         |    |    |    |    |   |   |
|          |                        |                      |         |         | 38.500  | 82.500  | 115.5311 | 82.5000  |                                      |    |        |    |             |                         |    |    |    |    |   |   |
| SGO_1979 | -0.865                 | 10.382               | 0.0004  | 0.0010  | 82.500  | 429.000 | 217.1401 | 446.4644 | rpsC; ribosomal protein S3           |    |        |    |             |                         |    |    |    |    |   |   |
|          |                        |                      |         |         | 85.500  | 414.000 | 256.5691 | 414.0000 |                                      |    |        |    |             |                         |    |    |    |    |   |   |
| SGO_1980 | 1.192                  | 9.751                | 0.0003  | 0.0005  | 108.000 | 134.000 | 284.2562 | 139.4551 | rplV; ribosomal protein L22          |    |        |    |             |                         |    |    |    |    |   |   |
|          |                        |                      |         |         | 105.000 | 123.000 | 315.0848 | 123.0000 |                                      |    |        |    |             |                         |    |    |    |    |   |   |
| SGO_1981 | -0.058                 | 9.485                | 0.0642  | 0.5800  | 62.000  | 159.000 | 163.1841 | 165.4728 | rpsS; ribosomal protein S19          |    |        |    |             |                         |    |    |    |    |   |   |
|          |                        |                      |         |         | 62.500  | 200.500 | 187.5505 | 200.5000 |                                      |    |        |    |             |                         |    |    |    |    |   |   |
| SGO_1982 | 0.562                  | 9.205                | 0.0042  | 0.0214  | 61.000  | 99.500  | 160.5521 | 103.5506 | rplB; ribosomal protein L2           |    |        |    |             |                         |    |    |    |    |   |   |
|          |                        |                      |         |         | 63.500  | 135.500 | 190.5513 | 135.5000 |                                      |    |        |    |             |                         |    |    |    |    |   |   |
| SGO_1983 | -0.221                 | 8.939                | 0.0161  | 0.1179  | 38.000  | 130.000 | 100.0161 | 135.2923 | rplW; ribosomal protein L23          |    |        |    |             |                         |    |    |    |    |   |   |
|          |                        |                      |         |         | 42.500  | 128.000 | 127.5343 | 128.0000 |                                      |    |        |    |             |                         |    |    |    |    |   |   |
| SGO_1984 | 1.443                  | 10.038               | 0.0004  | 0.0009  | 136.000 | 153.000 | 357.9522 | 159.2286 | rplD; ribosomal protein L4/L1 family |    |        |    |             |                         |    |    |    |    |   |   |
|          |                        |                      |         |         | 136.500 | 124.500 | 409.6102 | 124.5000 |                                      |    |        |    |             |                         |    |    |    |    |   |   |
| SGO_1985 | 2.068                  | 9.860                | 0.0001  | 0.0000  | 139.000 | 80.000  | 365.8482 | 83.2568  | rplC; ribosomal protein L3           |    |        |    |             |                         |    |    |    |    |   |   |
|          |                        |                      |         |         | 128.000 | 96.000  | 384.1034 | 96.0000  |                                      |    |        |    |             |                         |    |    |    |    |   |   |
| SGO_1986 | 0.996                  | 8.217                | 0.0008  | 0.0022  | 38.500  | 56.000  | 101.3321 | 58.2797  | rpsJ; ribosomal protein S10          |    |        |    |             |                         |    |    |    |    |   |   |
|          |                        |                      |         |         | 32.000  | 42.000  | 96.0258  | 42.0000  |                                      |    |        |    |             |                         |    |    |    |    |   |   |
| SGO_1989 | 1.422                  | 9.815                | 0.0003  | 0.0004  | 117.500 | 109.500 | 309.2602 | 113.9577 | purA; adenylosuccinate synthetase    |    |        |    |             |                         |    |    |    |    |   |   |
|          |                        |                      |         |         | 115.500 | 131.000 | 346.5933 | 131.0000 |                                      |    |        |    |             |                         |    |    |    |    |   |   |

- Show detected proteins only  
 Show all proteins

Proteins found:  
624

Filter by category:

ABC Transporter

Test

Cutoff

q-Value

.005

p-Value

|             | Signif | Direction | Applies To   |
|-------------|--------|-----------|--------------|
| Red         | yes    | +         | ratios, bars |
| Yellow      | no     | n/a       | bars         |
| Green       | yes    | -         | ratios, bars |
| Pink        | yes    | +         | p-, q-Values |
| Light Green | yes    | -         | p-, q-Values |

Dot Plots Dot Plots

Summary Table SgFn vs Sg SgPg vs Sg SgPgFn vs Sg SgPg vs SgFn SgPgFn vs SgFn SgPgFn vs SgPg Coverage

| Protein  | SgPgFn vs Sg           |                      |         |         | Raw     |         | Normalized |          | Description                                                      | Log <sub>2</sub> Ratios |    |    |   |   |
|----------|------------------------|----------------------|---------|---------|---------|---------|------------|----------|------------------------------------------------------------------|-------------------------|----|----|---|---|
|          | Log <sub>2</sub> Ratio | Log <sub>2</sub> Sum | q-Value | p-Value | SgPgFn  | Sg      | SgPgFn     | Sg       |                                                                  | -6                      | -4 | -2 | 0 | 2 |
| SGO_1990 | 1.153                  | 4.157                | 0.0196  | 0.1515  | 3.500   | 3.000   | 9.2120     | 3.1221   | glutamate--cysteine ligase, putative/amino acid ligase, putative |                         |    |    |   |   |
|          |                        |                      |         |         |         | 5.500   |            | 5.5000   |                                                                  |                         |    |    |   |   |
| SGO_1993 | -0.658                 | 7.153                | 0.0087  | 0.0534  | 8.500   | 35.000  | 22.3720    | 36.4248  | possible transcriptional regulator                               |                         |    |    |   |   |
|          |                        |                      |         |         | 11.000  | 50.500  | 33.0089    | 50.5000  |                                                                  |                         |    |    |   |   |
| SGO_1995 | -0.155                 | 5.158                | 0.0782  | 0.7315  | 4.000   | 16.500  | 10.5280    | 17.1717  | MutT/nudix family protein                                        |                         |    |    |   |   |
|          |                        |                      |         |         |         | 8.000   |            | 8.0000   |                                                                  |                         |    |    |   |   |
| SGO_1998 | -0.905                 | 6.939                | 0.0016  | 0.0059  | 9.500   | 41.000  | 25.0040    | 42.6691  | clpB; ATP-dependent Clp proteinase, ATP-binding chain            |                         |    |    |   |   |
|          |                        |                      |         |         | 6.000   | 37.000  | 18.0048    | 37.0000  |                                                                  |                         |    |    |   |   |
| SGO_2000 | 0.572                  | 11.072               | 0.0014  | 0.0052  | 260.000 | 443.500 | 684.3204   | 461.5547 | tsf; translation elongation factor Ts                            |                         |    |    |   |   |
|          |                        |                      |         |         | 201.000 | 404.500 | 603.1623   | 404.5000 |                                                                  |                         |    |    |   |   |
| SGO_2001 | 0.252                  | 10.944               | 0.0063  | 0.0353  | 191.000 | 455.000 | 502.7123   | 473.5229 | rpsB; ribosomal protein S2                                       |                         |    |    |   |   |
|          |                        |                      |         |         | 189.500 | 425.500 | 568.6531   | 425.5000 |                                                                  |                         |    |    |   |   |
| SGO_2005 | -4.242                 | 9.625                | 0.0001  | 0.0001  | 9.000   | 379.000 | 23.6880    | 394.4289 | LPXTG cell wall surface protein                                  |                         |    |    |   |   |
|          |                        |                      |         |         | 5.500   | 355.000 | 16.5044    | 355.0000 |                                                                  |                         |    |    |   |   |
| SGO_2007 | 0.048                  | 7.214                | 0.0366  | 0.3079  | 15.000  | 35.500  | 39.4800    | 36.9452  | nusG; transcription termination/antitermination factor NusG      |                         |    |    |   |   |
|          |                        |                      |         |         | 12.000  | 36.000  | 36.0097    | 36.0000  |                                                                  |                         |    |    |   |   |
| SGO_2024 | -1.812                 | 7.317                | 0.0008  | 0.0021  | 6.000   | 52.500  | 15.7920    | 54.6373  | Extracellular polysaccharide biosynthesis                        |                         |    |    |   |   |
|          |                        |                      |         |         | 6.500   | 69.500  | 19.5052    | 69.5000  |                                                                  |                         |    |    |   |   |
| SGO_2025 | -1.636                 | 6.420                | 0.0005  | 0.0011  | 3.000   | 30.000  | 7.8960     | 31.2213  | wze; putative autophosphorylating protein tyrosine kinase        |                         |    |    |   |   |
|          |                        |                      |         |         | 4.500   | 33.000  | 13.5036    | 33.0000  |                                                                  |                         |    |    |   |   |
| SGO_2033 | -1.279                 | 7.627                | 0.0002  | 0.0003  | 10.000  | 69.500  | 26.3200    | 72.3293  | nrdD; ribonucleoside-triphosphate reductase                      |                         |    |    |   |   |
|          |                        |                      |         |         | 10.500  | 67.500  | 31.5085    | 67.5000  |                                                                  |                         |    |    |   |   |
| SGO_2041 | 0.282                  | 3.847                | 0.0764  | 0.7107  | 2.000   | 3.000   | 5.2640     | 3.1221   | conserved hypothetical protein TIGR00250                         |                         |    |    |   |   |
|          |                        |                      |         |         |         | 6.000   |            | 6.0000   |                                                                  |                         |    |    |   |   |

Show detected proteins only  
 Show all proteins

Proteins found: 624

Filter by category:

**Test** **Cutoff**

|             | Signif | Direction | Applies To   |
|-------------|--------|-----------|--------------|
| Red         | yes    | +         | ratios, bars |
| Yellow      | no     | n/a       | bars         |
| Green       | yes    | -         | ratios, bars |
| Pink        | yes    | +         | p-, q-Values |
| Light Green | yes    | -         | p-, q-Values |

Dot Plots  Dot Plots

Summary Table

SgFn vs Sg

SgPg vs Sg

SgPgFn vs Sg

SgPg vs SgFn

SgPgFn vs SgFn

SgPgFn vs SgPg

Coverage

SgPgFn vs Sg

Raw

Normalized

Log<sub>2</sub> Ratios

| Protein  | SgPgFn vs Sg           |                      |         |         | Raw     |         |          |          | Normalized                                                 |    |        |    | Description | Log <sub>2</sub> Ratios |    |    |   |   |   |   |
|----------|------------------------|----------------------|---------|---------|---------|---------|----------|----------|------------------------------------------------------------|----|--------|----|-------------|-------------------------|----|----|---|---|---|---|
|          | Log <sub>2</sub> Ratio | Log <sub>2</sub> Sum | q-Value | p-Value | SgPgFn  | Sg      | SgPgFn   | Sg       | SgPgFn                                                     | Sg | SgPgFn | Sg |             | -6                      | -4 | -2 | 0 | 2 | 4 | 6 |
| SGO_2042 | 2.436                  | 8.867                | 0.0006  | 0.0013  | 83.500  | 40.500  | 219.7721 | 42.1487  | Bacterial protein of unknown function (DUF965) superfamily |    |        |    |             |                         |    |    |   |   |   |   |
|          |                        |                      |         |         | 58.000  | 31.000  | 174.0468 | 31.0000  |                                                            |    |        |    |             |                         |    |    |   |   |   |   |
| SGO_2045 | 0.911                  | 10.917               | 0.0007  | 0.0018  | 254.000 | 294.500 | 668.5284 | 306.4890 | recA; recA protein                                         |    |        |    |             |                         |    |    |   |   |   |   |
|          |                        |                      |         |         | 197.500 | 365.500 | 592.6595 | 365.5000 |                                                            |    |        |    |             |                         |    |    |   |   |   |   |
| SGO_2046 | -0.649                 | 5.179                | 0.0131  | 0.0925  | 3.000   | 8.000   | 7.8960   | 8.3257   | cinA; competence induced protein                           |    |        |    |             |                         |    |    |   |   |   |   |
|          |                        |                      |         |         | 2.000   | 14.000  | 6.0016   | 14.0000  |                                                            |    |        |    |             |                         |    |    |   |   |   |   |
| SGO_2053 | -1.264                 | 6.077                | 0.0018  | 0.0070  | 3.500   | 19.500  | 9.2120   | 20.2938  | DNA mismatch repair protein hexB                           |    |        |    |             |                         |    |    |   |   |   |   |
|          |                        |                      |         |         | 3.500   | 27.500  | 10.5028  | 27.5000  |                                                            |    |        |    |             |                         |    |    |   |   |   |   |
| SGO_2056 | -0.777                 | 6.303                | 0.0176  | 0.1321  | 3.500   | 18.500  | 9.2120   | 19.2531  | mutS; DNA mismatch repair protein MutS                     |    |        |    |             |                         |    |    |   |   |   |   |
|          |                        |                      |         |         | 7.000   | 29.500  | 21.0057  | 29.5000  |                                                            |    |        |    |             |                         |    |    |   |   |   |   |
| SGO_2058 | 0.830                  | 10.111               | 0.0006  | 0.0014  | 143.000 | 185.500 | 376.3762 | 193.0516 | argS; arginyl-tRNA synthetase                              |    |        |    |             |                         |    |    |   |   |   |   |
|          |                        |                      |         |         | 110.500 | 204.500 | 331.5892 | 204.5000 |                                                            |    |        |    |             |                         |    |    |   |   |   |   |
| SGO_2060 | -0.098                 | 7.496                | 0.0584  | 0.5233  | 17.500  | 37.000  | 46.0600  | 38.5063  | aspS-1; aspartyl-tRNA synthetase                           |    |        |    |             |                         |    |    |   |   |   |   |
|          |                        |                      |         |         | 13.500  | 55.500  | 40.5109  | 55.5000  |                                                            |    |        |    |             |                         |    |    |   |   |   |   |
| SGO_2062 | 0.880                  | 8.587                | 0.0018  | 0.0073  | 51.000  | 55.000  | 134.2321 | 57.2390  | hisS; histidyl-tRNA synthetase                             |    |        |    |             |                         |    |    |   |   |   |   |
|          |                        |                      |         |         | 38.000  | 79.000  | 114.0307 | 79.0000  |                                                            |    |        |    |             |                         |    |    |   |   |   |   |
| SGO_2064 | 1.405                  | 8.804                | 0.0002  | 0.0003  | 64.500  | 54.500  | 169.7641 | 56.7187  | ilvD; dihydroxy-acid dehydratase                           |    |        |    |             |                         |    |    |   |   |   |   |
|          |                        |                      |         |         | 51.500  | 66.000  | 154.5416 | 66.0000  |                                                            |    |        |    |             |                         |    |    |   |   |   |   |
| SGO_2066 | 1.056                  | 7.749                | 0.0037  | 0.0182  | 31.500  | 42.000  | 82.9080  | 43.7098  | rpmG; ribosomal protein L33                                |    |        |    |             |                         |    |    |   |   |   |   |
|          |                        |                      |         |         | 20.500  | 27.000  | 61.5166  | 27.0000  |                                                            |    |        |    |             |                         |    |    |   |   |   |   |
| SGO_2070 | -0.962                 | 6.219                | 0.0204  | 0.1592  | 5.500   | 12.500  | 14.4760  | 13.0089  | hypothetical protein SGO_2070                              |    |        |    |             |                         |    |    |   |   |   |   |
|          |                        |                      |         |         | 3.000   | 38.000  | 9.0024   | 38.0000  |                                                            |    |        |    |             |                         |    |    |   |   |   |   |
| SGO_2085 | -0.164                 | 8.270                | 0.0050  | 0.0265  | 28.500  | 75.500  | 75.0120  | 78.5736  | purB; adenylosuccinate lyase                               |    |        |    |             |                         |    |    |   |   |   |   |
|          |                        |                      |         |         | 23.500  | 84.500  | 70.5190  | 84.5000  |                                                            |    |        |    |             |                         |    |    |   |   |   |   |

- Show detected proteins only  
 Show all proteins

Proteins found:  
624

Filter by category:

ABC Transporter

Test

Cutoff

q-Value

.005

p-Value

|             | Signif | Direction | Applies To   |
|-------------|--------|-----------|--------------|
| Red         | yes    | +         | ratios, bars |
| Yellow      | no     | n/a       | bars         |
| Green       | yes    | -         | ratios, bars |
| Pink        | yes    | +         | p-, q-Values |
| Light Green | yes    | -         | p-, q-Values |

Dot Plots Dot Plots

Summary Table

SgFn vs Sg

SgPg vs Sg

SgPgFn vs Sg

SgPg vs SgFn

SgPgFn vs SgFn

SgPgFn vs SgPg

Coverage

SgPgFn vs Sg

Raw

Normalized

Log<sub>2</sub> Ratios

| Protein  | SgPgFn vs Sg           |                      |         |         | Raw     |          | Normalized |           | Description                                 | Log <sub>2</sub> Ratios |    |    |   |   |   |   |
|----------|------------------------|----------------------|---------|---------|---------|----------|------------|-----------|---------------------------------------------|-------------------------|----|----|---|---|---|---|
|          | Log <sub>2</sub> Ratio | Log <sub>2</sub> Sum | q-Value | p-Value | SgPgFn  | Sg       | SgPgFn     | Sg        |                                             | -6                      | -4 | -2 | 0 | 2 | 4 | 6 |
| SGO_2097 | -6.574                 | 9.979                | 0.0032  | 0.0151  | 2.000   | 493.500  | 5.2640     | 513.5902  | comA; ATP-binding Transport protein ComA    |                         |    |    |   |   |   |   |
|          |                        |                      |         |         |         | 490.000  |            | 490.0000  |                                             |                         |    |    |   |   |   |   |
| SGO_2098 | 0.782                  | 11.174               | 0.0034  | 0.0159  | 319.500 | 388.500  | 840.9245   | 404.3157  | rpsD; ribosomal protein S4                  |                         |    |    |   |   |   |   |
|          |                        |                      |         |         | 208.500 | 440.000  | 625.6684   | 440.0000  |                                             |                         |    |    |   |   |   |   |
| SGO_2100 | 2.702                  | 8.891                | 0.0001  | 0.0000  | 76.500  | 32.000   | 201.3481   | 33.3027   | ABC transporter substrate-binding protein   |                         |    |    |   |   |   |   |
|          |                        |                      |         |         | 70.000  | 30.000   | 210.0565   | 30.0000   |                                             |                         |    |    |   |   |   |   |
| SGO_2104 | -1.198                 | 9.753                | 0.0005  | 0.0011  | 59.000  | 291.000  | 155.2881   | 302.8465  | srtB; sortase B                             |                         |    |    |   |   |   |   |
|          |                        |                      |         |         | 36.500  | 295.500  | 109.5295   | 295.5000  |                                             |                         |    |    |   |   |   |   |
| SGO_2105 | -6.361                 | 12.333               | 0.0002  | 0.0003  | 11.500  | 2230.000 | 30.2680    | 2320.7824 | abpA; amylase-binding protein AbpA          |                         |    |    |   |   |   |   |
|          |                        |                      |         |         | 10.500  | 2777.000 | 31.5085    | 2777.0000 |                                             |                         |    |    |   |   |   |   |
| SGO_2106 | -0.130                 | 8.283                | 0.0006  | 0.0015  | 28.000  | 79.000   | 73.6960    | 82.2161   | ribose-phosphate diphosphokinase            |                         |    |    |   |   |   |   |
|          |                        |                      |         |         | 25.000  | 80.500   | 75.0202    | 80.5000   |                                             |                         |    |    |   |   |   |   |
| SGO_2133 | -1.206                 | 10.318               | 0.0002  | 0.0002  | 76.500  | 411.000  | 201.3481   | 427.7317  | Cell division protein ftsH-like protein     |                         |    |    |   |   |   |   |
|          |                        |                      |         |         | 61.500  | 462.500  | 184.5497   | 462.5000  |                                             |                         |    |    |   |   |   |   |
| SGO_2134 | -0.203                 | 7.684                | 0.0476  | 0.4172  | 21.500  | 62.500   | 56.5880    | 65.0444   | hpt; hypoxanthine phosphoribosyltransferase |                         |    |    |   |   |   |   |
|          |                        |                      |         |         | 13.000  | 45.000   | 39.0105    | 45.0000   |                                             |                         |    |    |   |   |   |   |
| SGO_2142 | 0.662                  | 8.157                | 0.0025  | 0.0106  | 30.000  | 48.500   | 78.9600    | 50.4744   | GTP-binding protein                         |                         |    |    |   |   |   |   |
|          |                        |                      |         |         | 32.000  | 60.000   | 96.0258    | 60.0000   |                                             |                         |    |    |   |   |   |   |
| SGO_2145 | -0.254                 | 9.586                | 0.0013  | 0.0045  | 67.000  | 208.000  | 176.3441   | 216.4676  | comE; competence response regulator ComE    |                         |    |    |   |   |   |   |
|          |                        |                      |         |         | 58.000  | 201.500  | 174.0468   | 201.5000  |                                             |                         |    |    |   |   |   |   |
| SGO_2146 | -2.665                 | 6.947                | 0.0073  | 0.0420  |         | 58.000   |            | 60.3612   | comD; histidine protein kinase ComD         |                         |    |    |   |   |   |   |
|          |                        |                      |         |         | 3.000   | 54.000   | 9.0024     | 54.0000   |                                             |                         |    |    |   |   |   |   |
| SGO_2150 | -2.772                 | 7.969                | 0.0002  | 0.0001  | 8.000   | 108.500  | 21.0560    | 112.9170  | degP; serine protease                       |                         |    |    |   |   |   |   |
|          |                        |                      |         |         | 4.000   | 104.500  | 12.0032    | 104.5000  |                                             |                         |    |    |   |   |   |   |

 Show detected proteins only Show all proteinsProteins found:  
624 Filter by category:

ABC Transporter

Test

Cutoff

q-Value

.005

p-Value

|  | Signif | Direction | Applies To   |
|--|--------|-----------|--------------|
|  | yes    | +         | ratios, bars |
|  | no     | n/a       | bars         |
|  | yes    | -         | ratios, bars |
|  | yes    | +         | p-, q-Values |
|  | yes    | -         | p-, q-Values |

Dot Plots Dot Plots
