# Supplementary material for: Proteomics of Streptococcus gordonii within a model developing oral microbial community
Source: PubMed Central journal article supplement (PMC3534352; doi:10.1186/1471-2180-12-211), 2012-09-18
Supplement: 1471-2180-12-211-S5.pdf [file 1471-2180-12-211-S5.pdf]

Summary Table

SgFn vs Sg

SgPg vs Sg

SgPgFn vs Sg

SgPg vs SgFn

SgPgFn vs SgFn

SgPgFn vs SgPg

Coverage

| Protein  | SgPg vs SgFn           |                      |         |         | Raw     |        | Normalized |          | Description                                                        | Log <sub>2</sub> Ratios |    |    |   |   |
|----------|------------------------|----------------------|---------|---------|---------|--------|------------|----------|--------------------------------------------------------------------|-------------------------|----|----|---|---|
|          | Log <sub>2</sub> Ratio | Log <sub>2</sub> Sum | q-Value | p-Value | SgPg    | SgFn   | SgPg       | SgFn     |                                                                    | -6                      | -4 | -2 | 0 | 2 |
| SGO_0001 | 0.148                  | 6.069                | 0.0468  | 0.3152  | 19.000  | 9.500  | 19.8503    | 14.5072  | dnaA; chromosomal replication initiator protein DnaA               |                         |    |    |   |   |
|          |                        |                      |         |         | 15.500  | 10.500 | 15.5000    | 17.2653  |                                                                    |                         |    |    |   |   |
| SGO_0002 | -0.090                 | 6.961                | 0.0299  | 0.1843  | 30.000  | 20.000 | 31.3426    | 30.5414  | dnaN; DNA polymerase III, beta subunit                             |                         |    |    |   |   |
|          |                        |                      |         |         | 29.000  | 20.500 | 29.0000    | 33.7085  |                                                                    |                         |    |    |   |   |
| SGO_0004 | -0.318                 | 7.080                | 0.0514  | 0.3501  | 36.500  | 29.500 | 38.1335    | 45.0485  | putative lipoprotein                                               |                         |    |    |   |   |
|          |                        |                      |         |         | 22.500  | 18.000 | 22.5000    | 29.5977  |                                                                    |                         |    |    |   |   |
| SGO_0006 | 0.304                  | 7.378                | 0.0161  | 0.0882  | 46.000  | 28.000 | 48.0586    | 42.7579  | ABC transporter, ATP-binding protein                               |                         |    |    |   |   |
|          |                        |                      |         |         | 43.500  | 19.500 | 43.5000    | 32.0642  |                                                                    |                         |    |    |   |   |
| SGO_0007 | 1.447                  | 6.385                | 0.0006  | 0.0008  | 29.000  | 9.000  | 30.2978    | 13.7436  | trpS; tryptophanyl-tRNA synthetase                                 |                         |    |    |   |   |
|          |                        |                      |         |         | 30.500  | 5.500  | 30.5000    | 9.0437   |                                                                    |                         |    |    |   |   |
| SGO_0008 | 0.755                  | 9.426                | 0.0009  | 0.0014  | 214.000 | 77.000 | 223.5770   | 117.5843 | inosine-5'-monophosphate dehydrogenase                             |                         |    |    |   |   |
|          |                        |                      |         |         | 208.000 | 84.500 | 208.0000   | 138.9447 |                                                                    |                         |    |    |   |   |
| SGO_0011 | -0.201                 | 4.002                | 0.0922  | 0.6812  | 6.000   |        | 6.2685     |          | proteinase, M16 family                                             |                         |    |    |   |   |
|          |                        |                      |         |         | 4.000   | 3.500  | 4.0000     | 5.7551   |                                                                    |                         |    |    |   |   |
| SGO_0015 | 0.514                  | 3.987                | 0.0097  | 0.0458  | 5.500   |        | 5.7461     |          | ABC transporter (ATP-binding protein)                              |                         |    |    |   |   |
|          |                        |                      |         |         | 6.000   | 2.500  | 6.0000     | 4.1108   |                                                                    |                         |    |    |   |   |
| SGO_0022 | -2.421                 | 7.479                | 0.0000  | 0.0000  | 13.000  | 50.000 | 13.5818    | 76.3534  | trmU; tRNA (5-methylaminomethyl-2-thiouridylate)-methyltransferase |                         |    |    |   |   |
|          |                        |                      |         |         | 14.500  | 45.000 | 14.5000    | 73.9942  |                                                                    |                         |    |    |   |   |
| SGO_0025 | 0.908                  | 5.502                | 0.0157  | 0.0846  | 17.500  | 3.500  | 18.2832    | 5.3447   | gidA; glucose inhibited division protein A                         |                         |    |    |   |   |
|          |                        |                      |         |         | 11.000  | 6.500  | 11.0000    | 10.6881  |                                                                    |                         |    |    |   |   |
| SGO_0027 | 0.756                  | 6.646                | 0.0011  | 0.0021  | 29.000  | 11.000 | 30.2978    | 16.7978  | rplI; ribosomal protein L9                                         |                         |    |    |   |   |
|          |                        |                      |         |         | 32.500  | 12.500 | 32.5000    | 20.5539  |                                                                    |                         |    |    |   |   |
| SGO_0028 | 0.991                  | 4.452                | 0.0119  | 0.0590  | 5.000   | 2.000  | 5.2238     | 3.0541   | dnaC; replicative DNA helicase                                     |                         |    |    |   |   |
|          |                        |                      |         |         | 9.500   | 2.500  | 9.5000     | 4.1108   |                                                                    |                         |    |    |   |   |

- Show detected proteins only
- Show all proteins

Proteins found: 713

Filter by category:

ABC Transporter

Test

Cutoff

q-Value

.005

p-Value

|             | Signif | Direction | Applies To   |
|-------------|--------|-----------|--------------|
| Red         | yes    | +         | ratios, bars |
| Yellow      | no     | n/a       | bars         |
| Green       | yes    | -         | ratios, bars |
| Pink        | yes    | +         | p-, q-Values |
| Light Green | yes    | -         | p-, q-Values |

Dot Plots Dot Plots

Summary Table SgFn vs Sg SgPg vs Sg SgPgFn vs Sg SgPg vs SgFn SgPgFn vs SgFn SgPgFn vs SgPg Coverage

| Protein  | SgPg vs SgFn           |                      |         |         | Raw      |        | Normalized |          | Description                                          | Log <sub>2</sub> Ratios |    |    |   |   |
|----------|------------------------|----------------------|---------|---------|----------|--------|------------|----------|------------------------------------------------------|-------------------------|----|----|---|---|
|          | Log <sub>2</sub> Ratio | Log <sub>2</sub> Sum | q-Value | p-Value | SgPg     | SgFn   | SgPg       | SgFn     |                                                      | -6                      | -4 | -2 | 0 | 2 |
| SGO_0030 | -1.184                 | 7.625                | 0.0001  | 0.0000  | 30.000   | 44.500 | 31.3426    | 67.9545  | aspB; aspartate transaminase                         |                         |    |    |   |   |
|          |                        |                      |         |         | 29.000   | 42.000 | 29.0000    | 69.0613  |                                                      |                         |    |    |   |   |
| SGO_0032 | 0.968                  | 6.584                | 0.0006  | 0.0007  | 30.500   | 9.500  | 31.8649    | 14.5072  | plsX; fatty acid/phospholipid synthesis protein PlsX |                         |    |    |   |   |
|          |                        |                      |         |         | 31.500   | 11.000 | 31.5000    | 18.0875  |                                                      |                         |    |    |   |   |
| SGO_0035 | -3.076                 | 4.751                | 0.0137  | 0.0713  |          | 7.500  |            | 11.4530  | phosphoribosylformylglycinamide synthase             |                         |    |    |   |   |
|          |                        |                      |         |         | 1.500    | 8.500  | 1.5000     | 13.9767  |                                                      |                         |    |    |   |   |
| SGO_0042 | -0.563                 | 5.766                | 0.0019  | 0.0045  | 11.500   | 11.000 | 12.0147    | 16.7978  | transcription regulator, GntR family                 |                         |    |    |   |   |
|          |                        |                      |         |         | 10.000   | 9.500  | 10.0000    | 15.6210  |                                                      |                         |    |    |   |   |
| SGO_0054 | -1.327                 | 8.019                | 0.0002  | 0.0001  | 33.500   | 59.000 | 34.9992    | 90.0970  | dltA; D-alanine-activating enzyme                    |                         |    |    |   |   |
|          |                        |                      |         |         | 39.000   | 58.000 | 39.0000    | 95.3703  |                                                      |                         |    |    |   |   |
| SGO_0057 | -0.280                 | 6.397                | 0.0215  | 0.1239  | 18.500   | 17.500 | 19.3279    | 26.7237  | dltD protein                                         |                         |    |    |   |   |
|          |                        |                      |         |         | 18.500   | 12.000 | 18.5000    | 19.7318  |                                                      |                         |    |    |   |   |
| SGO_0059 | 3.589                  | 11.564               | 0.0007  | 0.0009  | 1491.000 | 93.500 | 1557.7259  | 142.7809 | pXO1; hypothetical protein SGO_0059                  |                         |    |    |   |   |
|          |                        |                      |         |         | 1233.500 | 56.500 | 1233.5000  | 92.9039  |                                                      |                         |    |    |   |   |
| SGO_0063 | 0.204                  | 6.135                | 0.0400  | 0.2615  | 15.500   | 9.500  | 16.1937    | 14.5072  | hypothetical protein SGO_0063                        |                         |    |    |   |   |
|          |                        |                      |         |         | 21.500   | 11.000 | 21.5000    | 18.0875  |                                                      |                         |    |    |   |   |
| SGO_0064 | 1.133                  | 7.144                | 0.0027  | 0.0079  | 40.000   | 16.000 | 41.7901    | 24.4331  | FtsK/SpoIIIE family protein                          |                         |    |    |   |   |
|          |                        |                      |         |         | 55.500   | 12.000 | 55.5000    | 19.7318  |                                                      |                         |    |    |   |   |
| SGO_0065 | 0.298                  | 6.991                | 0.0071  | 0.0294  | 34.500   | 17.000 | 36.0440    | 25.9602  | hypothetical protein SGO_0065                        |                         |    |    |   |   |
|          |                        |                      |         |         | 34.000   | 19.000 | 34.0000    | 31.2420  |                                                      |                         |    |    |   |   |
| SGO_0066 | 1.034                  | 4.293                | 0.0278  | 0.1684  | 6.500    | 2.500  | 6.7909     | 3.8177   | D-3-phosphoglycerate dehydrogenase, putative         |                         |    |    |   |   |
|          |                        |                      |         |         | 9.000    |        | 9.0000     |          |                                                      |                         |    |    |   |   |
| SGO_0067 | 2.110                  | 6.156                | 0.0015  | 0.0035  | 32.000   | 5.000  | 33.4321    | 7.6353   | protein with prophage function domain                |                         |    |    |   |   |
|          |                        |                      |         |         | 24.500   | 3.500  | 24.5000    | 5.7551   |                                                      |                         |    |    |   |   |

Show detected proteins only  
 Show all proteins  
 Filter by category:

Proteins found: 713

**Test**      **Cutoff**  
     

|             | Signif | Direction | Applies To   |
|-------------|--------|-----------|--------------|
| Red         | yes    | +         | ratios, bars |
| Yellow      | no     | n/a       | bars         |
| Green       | yes    | -         | ratios, bars |
| Pink        | yes    | +         | p-, q-Values |
| Light Green | yes    | -         | p-, q-Values |

Dot Plots  Dot Plots

Summary Table

SgFn vs Sg

SgPg vs Sg

SgPgFn vs Sg

SgPg vs SgFn

SgPgFn vs SgFn

SgPgFn vs SgPg

Coverage

SgPg vs SgFn

Raw

Normalized

Log<sub>2</sub> Ratios

| Protein  | SgPg vs SgFn           |                      |         |         | Raw     |         | Normalized |          | Description                                    | Log <sub>2</sub> Ratios |    |    |   |   |   |   |
|----------|------------------------|----------------------|---------|---------|---------|---------|------------|----------|------------------------------------------------|-------------------------|----|----|---|---|---|---|
|          | Log <sub>2</sub> Ratio | Log <sub>2</sub> Sum | q-Value | p-Value | SgPg    | SgFn    | SgPg       | SgFn     |                                                | -6                      | -4 | -2 | 0 | 2 | 4 | 6 |
| SGO_0068 | 1.338                  | 5.123                | 0.0075  | 0.0324  | 13.500  |         | 14.1042    |          | lipoprotein, putative                          |                         |    |    |   |   |   |   |
|          |                        |                      |         |         | 15.000  | 3.500   | 15.0000    | 5.7551   |                                                |                         |    |    |   |   |   |   |
| SGO_0078 | 0.966                  | 4.360                | 0.0387  | 0.2518  | 9.500   |         | 9.9251     |          | hypothetical protein SGO_0078                  |                         |    |    |   |   |   |   |
|          |                        |                      |         |         | 6.500   | 2.500   | 6.5000     | 4.1108   |                                                |                         |    |    |   |   |   |   |
| SGO_0080 | 0.527                  | 6.346                | 0.0125  | 0.0629  | 24.500  | 13.500  | 25.5964    | 20.6154  | hypothetical protein SGO_0080                  |                         |    |    |   |   |   |   |
|          |                        |                      |         |         | 22.000  | 8.000   | 22.0000    | 13.1545  |                                                |                         |    |    |   |   |   |   |
| SGO_0081 | -0.142                 | 4.788                | 0.0913  | 0.6734  | 8.000   | 4.500   | 8.3580     | 6.8718   | hypothetical protein SGO_0081                  |                         |    |    |   |   |   |   |
|          |                        |                      |         |         | 5.000   | 4.500   | 5.0000     | 7.3994   |                                                |                         |    |    |   |   |   |   |
| SGO_0095 | -1.125                 | 6.431                | 0.0009  | 0.0016  | 12.500  | 21.000  | 13.0594    | 32.0684  | mccF; microcin immunity protein MccF, putative |                         |    |    |   |   |   |   |
|          |                        |                      |         |         | 14.000  | 16.500  | 14.0000    | 27.1312  |                                                |                         |    |    |   |   |   |   |
| SGO_0099 | -0.483                 | 4.566                | 0.0416  | 0.2746  | 4.000   | 2.500   | 4.1790     | 3.8177   | pula-2; pullulanase, type I                    |                         |    |    |   |   |   |   |
|          |                        |                      |         |         | 5.000   | 6.500   | 5.0000     | 10.6881  |                                                |                         |    |    |   |   |   |   |
| SGO_0100 | -0.717                 | 3.403                |         |         |         |         |            |          | maltose operon transcription repressor         |                         |    |    |   |   |   |   |
|          |                        |                      |         |         | 4.000   | 4.000   | 4.0000     | 6.5773   |                                                |                         |    |    |   |   |   |   |
| SGO_0104 | -0.447                 | 8.985                | 0.0077  | 0.0334  | 100.000 | 108.000 | 104.4752   | 164.9234 | Maltose/maltodextrin-binding protein precursor |                         |    |    |   |   |   |   |
|          |                        |                      |         |         | 109.000 | 78.000  | 109.0000   | 128.2566 |                                                |                         |    |    |   |   |   |   |
| SGO_0105 | -0.225                 | 6.182                | 0.0330  | 0.2061  | 16.500  | 15.000  | 17.2384    | 22.9060  | malQ; 4-alpha-glucanotransferase               |                         |    |    |   |   |   |   |
|          |                        |                      |         |         | 16.000  | 10.000  | 16.0000    | 16.4432  |                                                |                         |    |    |   |   |   |   |
| SGO_0106 | -0.879                 | 8.496                | 0.0019  | 0.0044  | 61.500  | 84.500  | 64.2523    | 129.0373 | glgP-2; maltodextrin phosphorylase             |                         |    |    |   |   |   |   |
|          |                        |                      |         |         | 62.500  | 64.000  | 62.5000    | 105.2362 |                                                |                         |    |    |   |   |   |   |
| SGO_0110 | 0.668                  | 3.090                |         |         | 5.000   |         | 5.2238     |          | phosphotyrosine protein phosphatase            |                         |    |    |   |   |   |   |
|          |                        |                      |         |         |         | 2.000   |            | 3.2886   |                                                |                         |    |    |   |   |   |   |
| SGO_0113 | 0.584                  | 11.427               | 0.0014  | 0.0031  | 838.500 | 375.000 | 876.0249   | 572.6507 | acdH; alcohol-acetaldehyde dehydrogenase       |                         |    |    |   |   |   |   |
|          |                        |                      |         |         | 777.000 | 321.500 | 777.0000   | 528.6476 |                                                |                         |    |    |   |   |   |   |

- Show detected proteins only  
 Show all proteins

Proteins found:  
713

Filter by category:

ABC Transporter

Test

Cutoff

q-Value

.005

p-Value

|             | Signif | Direction | Applies To   |
|-------------|--------|-----------|--------------|
| Red         | yes    | +         | ratios, bars |
| Yellow      | no     | n/a       | bars         |
| Green       | yes    | -         | ratios, bars |
| Pink        | yes    | +         | p-, q-Values |
| Light Green | yes    | -         | p-, q-Values |

Dot Plots Dot Plots

Summary Table SgFn vs Sg SgPg vs Sg SgPgFn vs Sg SgPg vs SgFn SgPgFn vs SgFn SgPgFn vs SgPg Coverage

| Protein  | SgPg vs SgFn           |                      |         |         | Raw     |         | Normalized |          | Description                                                              | Log <sub>2</sub> Ratios |    |    |   |   |
|----------|------------------------|----------------------|---------|---------|---------|---------|------------|----------|--------------------------------------------------------------------------|-------------------------|----|----|---|---|
|          | Log <sub>2</sub> Ratio | Log <sub>2</sub> Sum | q-Value | p-Value | SgPg    | SgFn    | SgPg       | SgFn     |                                                                          | -6                      | -4 | -2 | 0 | 2 |
| SGO_0134 | 0.434                  | 4.222                | 0.0641  | 0.4482  | 5.000   |         | 5.2238     |          | acetyltransferase, GNAT family                                           |                         |    |    |   |   |
|          |                        |                      |         |         | 8.500   | 3.000   | 8.5000     | 4.9329   |                                                                          |                         |    |    |   |   |
| SGO_0135 | -0.937                 | 7.410                | 0.0031  | 0.0095  | 25.500  | 41.500  | 26.6412    | 63.3733  | v-type sodium ATP synthase, subunit A                                    |                         |    |    |   |   |
|          |                        |                      |         |         | 31.500  | 29.500  | 31.5000    | 48.5073  |                                                                          |                         |    |    |   |   |
| SGO_0136 | -0.613                 | 7.410                | 0.0019  | 0.0047  | 29.500  | 35.500  | 30.8202    | 54.2109  | v-type sodium ATP synthase, chain B                                      |                         |    |    |   |   |
|          |                        |                      |         |         | 36.500  | 29.500  | 36.5000    | 48.5073  |                                                                          |                         |    |    |   |   |
| SGO_0139 | 0.074                  | 7.146                | 0.0368  | 0.2375  | 36.000  | 21.500  | 37.6111    | 32.8320  | thrC; threonine synthase                                                 |                         |    |    |   |   |
|          |                        |                      |         |         | 35.000  | 22.000  | 35.0000    | 36.1750  |                                                                          |                         |    |    |   |   |
| SGO_0144 | -1.478                 | 3.796                | 0.0265  | 0.1585  | 2.000   | 4.500   | 2.0895     | 6.8718   | hypothetical protein SGO_0144                                            |                         |    |    |   |   |
|          |                        |                      |         |         |         | 3.000   |            | 4.9329   |                                                                          |                         |    |    |   |   |
| SGO_0145 | -0.841                 | 7.372                | 0.0061  | 0.0248  | 27.000  | 41.500  | 28.2083    | 63.3733  | polI; DNA polymerase I                                                   |                         |    |    |   |   |
|          |                        |                      |         |         | 30.500  | 26.500  | 30.5000    | 43.5744  |                                                                          |                         |    |    |   |   |
| SGO_0146 | -0.397                 | 6.110                | 0.0195  | 0.1112  | 16.000  | 15.000  | 16.7160    | 22.9060  | CoA-binding domain protein                                               |                         |    |    |   |   |
|          |                        |                      |         |         | 13.000  | 10.000  | 13.0000    | 16.4432  |                                                                          |                         |    |    |   |   |
| SGO_0152 | 0.622                  | 5.762                | 0.0322  | 0.1998  | 14.500  | 10.500  | 15.1489    | 16.0342  | tgt; queuine tRNA-ribosyltransferase                                     |                         |    |    |   |   |
|          |                        |                      |         |         | 16.500  | 4.000   | 16.5000    | 6.5773   |                                                                          |                         |    |    |   |   |
| SGO_0154 | -1.270                 | 10.934               | 0.0011  | 0.0022  | 307.000 | 493.000 | 320.7390   | 752.8447 | pgi; glucose-6-phosphate isomerase                                       |                         |    |    |   |   |
|          |                        |                      |         |         | 254.000 | 382.500 | 254.0000   | 628.9508 |                                                                          |                         |    |    |   |   |
| SGO_0158 | -1.423                 | 8.300                | 0.0006  | 0.0007  | 37.500  | 70.000  | 39.1782    | 106.8948 | 2,3,4,5-tetrahydropyridine-2-carboxylate N-succinyltransferase, putative |                         |    |    |   |   |
|          |                        |                      |         |         | 46.500  | 74.500  | 46.5000    | 122.5015 |                                                                          |                         |    |    |   |   |
| SGO_0159 | -1.718                 | 3.164                |         |         | 2.000   | 4.500   | 2.0895     | 6.8718   | hippurate hydrolase                                                      |                         |    |    |   |   |
|          |                        |                      |         |         |         |         |            |          |                                                                          |                         |    |    |   |   |
| SGO_0163 | 0.182                  | 7.353                | 0.0069  | 0.0286  | 41.000  | 26.500  | 42.8348    | 40.4673  | galU; UTP-glucose-1-phosphate uridylyltransferase                        |                         |    |    |   |   |
|          |                        |                      |         |         | 44.000  | 22.000  | 44.0000    | 36.1750  |                                                                          |                         |    |    |   |   |

Show detected proteins only  
 Show all proteins  
 Filter by category:

Proteins found: 713

**Test**      **Cutoff**  
     

|             | Signif | Direction | Applies To   |
|-------------|--------|-----------|--------------|
| Red         | yes    | +         | ratios, bars |
| Yellow      | no     | n/a       | bars         |
| Green       | yes    | -         | ratios, bars |
| Pink        | yes    | +         | p-, q-Values |
| Light Green | yes    | -         | p-, q-Values |

[Dot Plots](#)

Summary Table

SgFn vs Sg

SgPg vs Sg

SgPgFn vs Sg

SgPg vs SgFn

SgPgFn vs SgFn

SgPgFn vs SgPg

Coverage

SgPg vs SgFn

Raw

Normalized

Log<sub>2</sub> Ratios

| Protein  | SgPg vs SgFn           |                      |         |         | Raw    |        | Normalized |          | Description                                                                                          | Log <sub>2</sub> Ratios |    |    |   |   |
|----------|------------------------|----------------------|---------|---------|--------|--------|------------|----------|------------------------------------------------------------------------------------------------------|-------------------------|----|----|---|---|
|          | Log <sub>2</sub> Ratio | Log <sub>2</sub> Sum | q-Value | p-Value | SgPg   | SgFn   | SgPg       | SgFn     |                                                                                                      | -6                      | -4 | -2 | 0 | 2 |
| SGO_0164 | -0.577                 | 7.010                | 0.0080  | 0.0354  | 28.000 | 22.000 | 29.2531    | 33.5955  | Glycerol-3-phosphate dehydrogenase [NAD (P)+] (NAD(P)H-dependent glycerol-3-phosphate dehydrogenase) |                         |    |    |   |   |
|          |                        |                      |         |         | 22.500 | 26.500 | 22.5000    | 43.5744  |                                                                                                      |                         |    |    |   |   |
| SGO_0169 | -1.427                 | 6.200                | 0.0032  | 0.0101  | 11.500 | 20.500 | 12.0147    | 31.3049  | dut; dUTP diphosphatase                                                                              |                         |    |    |   |   |
|          |                        |                      |         |         | 8.000  | 13.500 | 8.0000     | 22.1983  |                                                                                                      |                         |    |    |   |   |
| SGO_0171 | 0.587                  | 4.795                | 0.0400  | 0.2623  | 8.500  | 4.500  | 8.8804     | 6.8718   | radA; DNA repair protein RadA                                                                        |                         |    |    |   |   |
|          |                        |                      |         |         | 12.000 |        | 12.0000    |          |                                                                                                      |                         |    |    |   |   |
| SGO_0173 | -1.884                 | 6.016                | 0.0008  | 0.0013  | 7.500  | 15.000 | 7.8356     | 22.9060  | Carbonic anhydrase                                                                                   |                         |    |    |   |   |
|          |                        |                      |         |         | 6.000  | 17.000 | 6.0000     | 27.9534  |                                                                                                      |                         |    |    |   |   |
| SGO_0174 | 0.356                  | 8.459                | 0.0157  | 0.0841  | 94.500 | 60.000 | 98.7291    | 91.6241  | gltX; glutamyl-tRNA synthetase                                                                       |                         |    |    |   |   |
|          |                        |                      |         |         | 97.500 | 39.000 | 97.5000    | 64.1283  |                                                                                                      |                         |    |    |   |   |
| SGO_0180 | 0.815                  | 6.068                | 0.0151  | 0.0803  | 26.500 | 6.500  | 27.6859    | 9.9259   | jag; hypothetical protein SGO_0180                                                                   |                         |    |    |   |   |
|          |                        |                      |         |         | 15.500 | 8.500  | 15.5000    | 13.9767  |                                                                                                      |                         |    |    |   |   |
| SGO_0188 | -0.729                 | 4.120                | 0.0340  | 0.2137  |        | 5.000  |            | 7.6353   | hydrolase, TatD family                                                                               |                         |    |    |   |   |
|          |                        |                      |         |         | 4.000  | 3.500  | 4.0000     | 5.7551   |                                                                                                      |                         |    |    |   |   |
| SGO_0193 | 0.840                  | 4.614                | 0.0309  | 0.1910  | 6.500  | 1.500  | 6.7909     | 2.2906   | ksgA; dimethyladenosine transferase                                                                  |                         |    |    |   |   |
|          |                        |                      |         |         | 8.000  | 4.500  | 8.0000     | 7.3994   |                                                                                                      |                         |    |    |   |   |
| SGO_0197 | -0.890                 | 4.539                | 0.0020  | 0.0048  | 3.500  | 4.500  | 3.6566     | 6.8718   | predicted ribosome small subunit-dependent GTPase A                                                  |                         |    |    |   |   |
|          |                        |                      |         |         | 4.500  | 5.000  | 4.5000     | 8.2216   |                                                                                                      |                         |    |    |   |   |
| SGO_0198 | -1.704                 | 8.123                | 0.0002  | 0.0001  | 32.000 | 67.000 | 33.4321    | 102.3136 | rpe; ribulose-phosphate 3-epimerase                                                                  |                         |    |    |   |   |
|          |                        |                      |         |         | 32.000 | 67.500 | 32.0000    | 110.9913 |                                                                                                      |                         |    |    |   |   |
| SGO_0200 | 0.255                  | 6.525                | 0.0010  | 0.0018  | 24.500 | 13.500 | 25.5964    | 20.6154  | competence-induced protein Ccs50                                                                     |                         |    |    |   |   |
|          |                        |                      |         |         | 24.500 | 13.000 | 24.5000    | 21.3761  |                                                                                                      |                         |    |    |   |   |
| SGO_0201 | -1.470                 | 7.726                | 0.0022  | 0.0060  | 26.000 | 43.000 | 27.1636    | 65.6639  | cmp-binding-factor 1                                                                                 |                         |    |    |   |   |
|          |                        |                      |         |         | 28.500 | 55.000 | 28.5000    | 90.4374  |                                                                                                      |                         |    |    |   |   |

- Show detected proteins only  
 Show all proteins

Proteins found:  
713

Filter by category:

ABC Transporter

Test

Cutoff

q-Value

.005

p-Value

|             | Signif | Direction | Applies To   |
|-------------|--------|-----------|--------------|
| Red         | yes    | +         | ratios, bars |
| Yellow      | no     | n/a       | bars         |
| Green       | yes    | -         | ratios, bars |
| Pink        | yes    | +         | p-, q-Values |
| Light Green | yes    | -         | p-, q-Values |

Dot Plots Dot Plots

Summary Table

SgFn vs Sg

SgPg vs Sg

SgPgFn vs Sg

SgPg vs SgFn

SgPgFn vs SgFn

SgPgFn vs SgPg

Coverage

| Protein  | SgPg vs SgFn           |                      |         |         | Raw      |          | Normalized |           | Description                                           | Log <sub>2</sub> Ratios |    |    |   |   |   |   |
|----------|------------------------|----------------------|---------|---------|----------|----------|------------|-----------|-------------------------------------------------------|-------------------------|----|----|---|---|---|---|
|          | Log <sub>2</sub> Ratio | Log <sub>2</sub> Sum | q-Value | p-Value | SgPg     | SgFn     | SgPg       | SgFn      |                                                       | -6                      | -4 | -2 | 0 | 2 | 4 | 6 |
| SGO_0202 | -0.250                 | 5.128                | 0.0384  | 0.2496  | 7.000    | 5.000    | 7.3133     | 7.6353    | pur operon repressor                                  |                         |    |    |   |   |   |   |
|          |                        |                      |         |         | 8.500    | 7.000    | 8.5000     | 11.5102   |                                                       |                         |    |    |   |   |   |   |
| SGO_0204 | 0.174                  | 7.649                | 0.0829  | 0.6053  | 56.500   | 39.500   | 59.0285    | 60.3192   | rpsL; ribosomal protein S12                           |                         |    |    |   |   |   |   |
|          |                        |                      |         |         | 46.000   | 21.500   | 46.0000    | 35.3528   |                                                       |                         |    |    |   |   |   |   |
| SGO_0205 | 0.345                  | 9.103                | 0.0281  | 0.1707  | 124.000  | 92.500   | 129.5493   | 141.2538  | rpsG; ribosomal protein S7                            |                         |    |    |   |   |   |   |
|          |                        |                      |         |         | 178.000  | 61.500   | 178.0000   | 101.1254  |                                                       |                         |    |    |   |   |   |   |
| SGO_0206 | 0.424                  | 12.143               | 0.0008  | 0.0013  | 1277.000 | 652.000  | 1334.1488  | 995.6486  | fusA; translation elongation factor G                 |                         |    |    |   |   |   |   |
|          |                        |                      |         |         | 1258.000 | 569.500  | 1258.0000  | 936.4379  |                                                       |                         |    |    |   |   |   |   |
| SGO_0207 | -0.118                 | 12.434               | 0.0006  | 0.0008  | 1267.000 | 934.000  | 1323.7013  | 1426.2819 | gap; glyceraldehyde-3-phosphate dehydrogenase, type I |                         |    |    |   |   |   |   |
|          |                        |                      |         |         | 1330.000 | 884.000  | 1330.0000  | 1453.5753 |                                                       |                         |    |    |   |   |   |   |
| SGO_0209 | 0.736                  | 13.083               | 0.0007  | 0.0009  | 2477.500 | 1110.000 | 2588.3741  | 1695.0460 | pgk; phosphoglycerate kinase                          |                         |    |    |   |   |   |   |
|          |                        |                      |         |         | 2836.000 | 949.000  | 2836.0000  | 1560.4558 |                                                       |                         |    |    |   |   |   |   |
| SGO_0210 | -4.474                 | 6.540                | 0.0009  | 0.0016  | 1.500    | 33.500   | 1.5671     | 51.1568   | sspA; streptococcal surface protein A                 |                         |    |    |   |   |   |   |
|          |                        |                      |         |         | 2.500    | 23.000   | 2.5000     | 37.8193   |                                                       |                         |    |    |   |   |   |   |
| SGO_0215 | -0.240                 | 8.195                | 0.0085  | 0.0389  | 70.000   | 51.500   | 73.1327    | 78.6440   | glnA; glutamine synthetase, type I                    |                         |    |    |   |   |   |   |
|          |                        |                      |         |         | 61.500   | 48.500   | 61.5000    | 79.7493   |                                                       |                         |    |    |   |   |   |   |
| SGO_0219 | 0.373                  | 7.721                | 0.0007  | 0.0008  | 57.000   | 29.000   | 59.5509    | 44.2850   | metallo-beta-lactamase superfamily protein 1          |                         |    |    |   |   |   |   |
|          |                        |                      |         |         | 59.500   | 29.000   | 59.5000    | 47.6852   |                                                       |                         |    |    |   |   |   |   |
| SGO_0220 | -0.171                 | 4.418                | 0.0848  | 0.6214  | 5.500    | 5.000    | 5.7461     | 7.6353    | Protein of unknown function (DUF1447) superfamily     |                         |    |    |   |   |   |   |
|          |                        |                      |         |         | 8.000    |          | 8.0000     |           |                                                       |                         |    |    |   |   |   |   |
| SGO_0223 | 0.669                  | 3.791                |         |         |          | 3.500    |            | 5.3447    | glycoproteinase family protein                        |                         |    |    |   |   |   |   |
|          |                        |                      |         |         | 8.500    |          | 8.5000     |           |                                                       |                         |    |    |   |   |   |   |
| SGO_0230 | 0.940                  | 5.270                | 0.0117  | 0.0564  | 12.500   | 6.500    | 13.0594    | 9.9259    | Protein of unknown function, DUF536 family            |                         |    |    |   |   |   |   |
|          |                        |                      |         |         | 11.500   | 2.500    | 11.5000    | 4.1108    |                                                       |                         |    |    |   |   |   |   |

- Show detected proteins only
- Show all proteins

Proteins found: 713

Filter by category:

ABC Transporter

Test

Cutoff

q-Value

.005

p-Value

|             | Signif | Direction | Applies To   |
|-------------|--------|-----------|--------------|
| Red         | yes    | +         | ratios, bars |
| Yellow      | no     | n/a       | bars         |
| Green       | yes    | -         | ratios, bars |
| Pink        | yes    | +         | p-, q-Values |
| Light Green | yes    | -         | p-, q-Values |

Dot Plots Dot Plots

Summary Table

SgFn vs Sg

SgPg vs Sg

SgPgFn vs Sg

SgPg vs SgFn

SgPgFn vs SgFn

SgPgFn vs SgPg

Coverage

SgPg vs SgFn

Raw

Normalized

Log<sub>2</sub> Ratios

| Protein  | SgPg vs SgFn           |                      |         |         | Raw     |         | Normalized |          | Description                                      | Log <sub>2</sub> Ratios |    |    |   |   |   |   |
|----------|------------------------|----------------------|---------|---------|---------|---------|------------|----------|--------------------------------------------------|-------------------------|----|----|---|---|---|---|
|          | Log <sub>2</sub> Ratio | Log <sub>2</sub> Sum | q-Value | p-Value | SgPg    | SgFn    | SgPg       | SgFn     |                                                  | -6                      | -4 | -2 | 0 | 2 | 4 | 6 |
| SGO_0234 | -0.442                 | 7.280                | 0.0043  | 0.0153  | 35.000  | 30.500  | 36.5663    | 46.5756  | pepX; X-Pro dipeptidyl-peptidase                 |                         |    |    |   |   |   |   |
|          |                        |                      |         |         | 29.500  | 26.000  | 29.5000    | 42.7522  |                                                  |                         |    |    |   |   |   |   |
| SGO_0237 | 0.508                  | 5.557                | 0.0255  | 0.1510  | 12.500  | 4.500   | 13.0594    | 6.8718   | ccpA; CcpA protein (proteinase)                  |                         |    |    |   |   |   |   |
|          |                        |                      |         |         | 14.000  | 8.000   | 14.0000    | 13.1545  |                                                  |                         |    |    |   |   |   |   |
| SGO_0243 | -1.190                 | 4.998                | 0.0013  | 0.0029  | 4.500   | 6.500   | 4.7014     | 9.9259   | hydroxymethylglutaryl-CoA reductase, degradative |                         |    |    |   |   |   |   |
|          |                        |                      |         |         | 5.000   | 7.500   | 5.0000     | 12.3324  |                                                  |                         |    |    |   |   |   |   |
| SGO_0244 | 0.032                  | 5.664                | 0.1189  | 0.9011  | 11.500  | 9.500   | 12.0147    | 14.5072  | hydroxymethylglutaryl-CoA synthase               |                         |    |    |   |   |   |   |
|          |                        |                      |         |         | 13.500  | 6.500   | 13.5000    | 10.6881  |                                                  |                         |    |    |   |   |   |   |
| SGO_0247 | -0.854                 | 10.354               | 0.0067  | 0.0274  | 213.500 | 223.500 | 223.0546   | 341.2998 | pfl; formate acetyltransferase                   |                         |    |    |   |   |   |   |
|          |                        |                      |         |         | 237.500 | 308.500 | 237.5000   | 507.2715 |                                                  |                         |    |    |   |   |   |   |
| SGO_0252 | -1.020                 | 4.417                | 0.0086  | 0.0395  | 4.500   | 5.500   | 4.7014     | 8.3989   | possible TetR-type transcriptional regulator     |                         |    |    |   |   |   |   |
|          |                        |                      |         |         | 2.500   | 3.500   | 2.5000     | 5.7551   |                                                  |                         |    |    |   |   |   |   |
| SGO_0255 | 0.297                  | 5.938                | 0.0082  | 0.0371  | 16.000  | 10.000  | 16.7160    | 15.2707  | Signal peptidase I                               |                         |    |    |   |   |   |   |
|          |                        |                      |         |         | 17.000  | 7.500   | 17.0000    | 12.3324  |                                                  |                         |    |    |   |   |   |   |
| SGO_0260 | 0.597                  | 6.310                | 0.0062  | 0.0249  | 21.500  | 8.500   | 22.4622    | 12.9801  | DNA mismatch binding protein MutS2               |                         |    |    |   |   |   |   |
|          |                        |                      |         |         | 25.000  | 11.500  | 25.0000    | 18.9096  |                                                  |                         |    |    |   |   |   |   |
| SGO_0262 | 0.261                  | 6.793                | 0.0115  | 0.0553  | 30.500  | 18.000  | 31.8649    | 27.4872  | dipeptidase                                      |                         |    |    |   |   |   |   |
|          |                        |                      |         |         | 28.500  | 14.000  | 28.5000    | 23.0204  |                                                  |                         |    |    |   |   |   |   |
| SGO_0263 | 0.431                  | 7.051                | 0.0237  | 0.1383  | 34.500  | 14.000  | 36.0440    | 21.3790  | trx-1; thioredoxin                               |                         |    |    |   |   |   |   |
|          |                        |                      |         |         | 39.000  | 22.000  | 39.0000    | 36.1750  |                                                  |                         |    |    |   |   |   |   |
| SGO_0272 | -0.367                 | 5.966                | 0.0163  | 0.0892  | 13.000  | 13.500  | 13.5818    | 20.6154  | hypothetical protein SGO_0272                    |                         |    |    |   |   |   |   |
|          |                        |                      |         |         | 13.500  | 9.000   | 13.5000    | 14.7988  |                                                  |                         |    |    |   |   |   |   |
| SGO_0276 | -0.334                 | 9.070                | 0.0083  | 0.0379  | 114.000 | 108.500 | 119.1018   | 165.6869 | gdhA; glutamate dehydrogenase (NADP)             |                         |    |    |   |   |   |   |
|          |                        |                      |         |         | 118.000 | 82.000  | 118.0000   | 134.8339 |                                                  |                         |    |    |   |   |   |   |

- Show detected proteins only  
 Show all proteins

Proteins found:  
713

Filter by category:

ABC Transporter

Test

Cutoff

q-Value

.005

p-Value

|             | Signif | Direction | Applies To   |
|-------------|--------|-----------|--------------|
| Red         | yes    | +         | ratios, bars |
| Yellow      | no     | n/a       | bars         |
| Green       | yes    | -         | ratios, bars |
| Pink        | yes    | +         | p-, q-Values |
| Light Green | yes    | -         | p-, q-Values |

Dot Plots Dot Plots

Summary Table

SgFn vs Sg

SgPg vs Sg

SgPgFn vs Sg

SgPg vs SgFn

SgPgFn vs SgFn

SgPgFn vs SgPg

Coverage

SgPg vs SgFn

Raw

Normalized

Log<sub>2</sub> Ratios

| Protein  | SgPg vs SgFn           |                      |         |         | Raw     |         | Normalized |          | Description                                                                   | Log <sub>2</sub> Ratios |    |    |   |   |   |   |
|----------|------------------------|----------------------|---------|---------|---------|---------|------------|----------|-------------------------------------------------------------------------------|-------------------------|----|----|---|---|---|---|
|          | Log <sub>2</sub> Ratio | Log <sub>2</sub> Sum | q-Value | p-Value | SgPg    | SgFn    | SgPg       | SgFn     |                                                                               | -6                      | -4 | -2 | 0 | 2 | 4 | 6 |
| SGO_0277 | -0.766                 | 5.384                | 0.0153  | 0.0815  | 9.000   | 6.500   | 9.4028     | 9.9259   | pyrA; Dihydroorotate dehydrogenase                                            |                         |    |    |   |   |   |   |
|          |                        |                      |         |         | 6.000   | 10.000  | 6.0000     | 16.4432  |                                                                               |                         |    |    |   |   |   |   |
| SGO_0280 | -1.269                 | 6.326                | 0.0124  | 0.0620  | 14.000  | 25.000  | 14.6265    | 38.1767  | trzA; ethylammine chlorohydrolase                                             |                         |    |    |   |   |   |   |
|          |                        |                      |         |         | 8.500   | 11.500  | 8.5000     | 18.9096  |                                                                               |                         |    |    |   |   |   |   |
| SGO_0288 | -1.232                 | 3.610                | 0.0111  | 0.0536  | 3.000   |         | 3.1343     |          | GDSL-like lipase/acylhydrolase                                                |                         |    |    |   |   |   |   |
|          |                        |                      |         |         | 2.500   | 4.000   | 2.5000     | 6.5773   |                                                                               |                         |    |    |   |   |   |   |
| SGO_0291 | 0.297                  | 6.175                | 0.0019  | 0.0045  | 18.500  | 11.000  | 19.3279    | 16.7978  | copper-translocating P-type ATPase                                            |                         |    |    |   |   |   |   |
|          |                        |                      |         |         | 20.500  | 9.500   | 20.5000    | 15.6210  |                                                                               |                         |    |    |   |   |   |   |
| SGO_0292 | 2.395                  | 8.289                | 0.0002  | 0.0001  | 120.000 | 15.500  | 125.3703   | 23.6696  | spxB; pyruvate oxidase                                                        |                         |    |    |   |   |   |   |
|          |                        |                      |         |         | 137.500 | 16.000  | 137.5000   | 26.3091  |                                                                               |                         |    |    |   |   |   |   |
| SGO_0310 | -0.916                 | 4.329                | 0.0290  | 0.1782  | 4.000   | 4.500   | 4.1790     | 6.8718   | metE; 5-methyltetrahydropteroyltriglutamate--homocysteine S-methyltransferase |                         |    |    |   |   |   |   |
|          |                        |                      |         |         |         | 5.500   |            | 9.0437   |                                                                               |                         |    |    |   |   |   |   |
| SGO_0312 | -0.479                 | 11.127               | 0.0008  | 0.0013  | 441.500 | 444.000 | 461.2582   | 678.0184 | xfp; D-xylulose 5-phosphate/D-fructose 6-phosphate phosphoketolase            |                         |    |    |   |   |   |   |
|          |                        |                      |         |         | 472.500 | 380.000 | 472.5000   | 624.8401 |                                                                               |                         |    |    |   |   |   |   |
| SGO_0321 | -0.690                 | 6.785                | 0.0021  | 0.0052  | 18.000  | 23.500  | 18.8055    | 35.8861  | polypeptide deformylase                                                       |                         |    |    |   |   |   |   |
|          |                        |                      |         |         | 23.500  | 19.500  | 23.5000    | 32.0642  |                                                                               |                         |    |    |   |   |   |   |
| SGO_0327 | -1.654                 | 2.700                |         |         | 1.500   |         | 1.5671     |          | Lipopolysaccharide N-acetylglucosaminyltransferase                            |                         |    |    |   |   |   |   |
|          |                        |                      |         |         |         | 3.000   |            | 4.9329   |                                                                               |                         |    |    |   |   |   |   |
| SGO_0333 | 0.234                  | 7.759                | 0.0419  | 0.2768  | 55.000  | 39.500  | 57.4614    | 60.3192  | rpsO; ribosomal protein S15                                                   |                         |    |    |   |   |   |   |
|          |                        |                      |         |         | 58.500  | 24.500  | 58.5000    | 40.2857  |                                                                               |                         |    |    |   |   |   |   |
| SGO_0339 | -3.474                 | 5.190                | 0.0118  | 0.0574  | 1.500   | 10.500  | 1.5671     | 16.0342  | hypothetical protein SGO_0339                                                 |                         |    |    |   |   |   |   |
|          |                        |                      |         |         |         | 11.500  |            | 18.9096  |                                                                               |                         |    |    |   |   |   |   |
| SGO_0342 | -0.629                 | 8.075                | 0.0021  | 0.0050  | 46.000  | 56.500  | 48.0586    | 86.2794  | pepF-2; oligoendopeptidase                                                    |                         |    |    |   |   |   |   |
|          |                        |                      |         |         | 58.000  | 47.000  | 58.0000    | 77.2828  |                                                                               |                         |    |    |   |   |   |   |

 Show detected proteins only Show all proteinsProteins found:  
713 Filter by category:

ABC Transporter

Test

Cutoff

q-Value

.005

p-Value

|             | Signif | Direction | Applies To   |
|-------------|--------|-----------|--------------|
| Red         | yes    | +         | ratios, bars |
| Yellow      | no     | n/a       | bars         |
| Green       | yes    | -         | ratios, bars |
| Pink        | yes    | +         | p-, q-Values |
| Light Green | yes    | -         | p-, q-Values |

Dot Plots Dot Plots



Summary Table

SgFn vs Sg

SgPg vs Sg

SgPgFn vs Sg

SgPg vs SgFn

SgPgFn vs SgFn

SgPgFn vs SgPg

Coverage

SgPg vs SgFn

Raw

Normalized

Log<sub>2</sub> Ratios

| Protein  | SgPg vs SgFn           |                      |         |         | Raw     |         | Normalized |          | Description                                     | Log <sub>2</sub> Ratios |    |    |   |   |   |   |
|----------|------------------------|----------------------|---------|---------|---------|---------|------------|----------|-------------------------------------------------|-------------------------|----|----|---|---|---|---|
|          | Log <sub>2</sub> Ratio | Log <sub>2</sub> Sum | q-Value | p-Value | SgPg    | SgFn    | SgPg       | SgFn     |                                                 | -6                      | -4 | -2 | 0 | 2 | 4 | 6 |
| SGO_0344 | -0.343                 | 8.646                | 0.0046  | 0.0170  | 85.500  | 79.000  | 89.3263    | 120.6384 | pnpA; polyribonucleotide nucleotidyltransferase |                         |    |    |   |   |   |   |
|          |                        |                      |         |         | 87.000  | 63.000  | 87.0000    | 103.5919 |                                                 |                         |    |    |   |   |   |   |
| SGO_0348 | -0.942                 | 3.810                | 0.0043  | 0.0151  | 3.500   | 4.500   | 3.6566     | 6.8718   | reductase                                       |                         |    |    |   |   |   |   |
|          |                        |                      |         |         | 3.500   |         | 3.5000     |          |                                                 |                         |    |    |   |   |   |   |
| SGO_0349 | -0.796                 | 6.568                | 0.0072  | 0.0301  | 16.500  | 16.000  | 17.2384    | 24.4331  | cysS; cysteinyl-tRNA synthetase                 |                         |    |    |   |   |   |   |
|          |                        |                      |         |         | 17.000  | 22.000  | 17.0000    | 36.1750  |                                                 |                         |    |    |   |   |   |   |
| SGO_0352 | -0.396                 | 7.112                | 0.0042  | 0.0144  | 31.500  | 25.000  | 32.9097    | 38.1767  | ABC transporter, ATP-binding protein SP1580     |                         |    |    |   |   |   |   |
|          |                        |                      |         |         | 27.000  | 24.500  | 27.0000    | 40.2857  |                                                 |                         |    |    |   |   |   |   |
| SGO_0353 | -0.501                 | 4.341                | 0.0414  | 0.2728  | 5.000   | 2.500   | 5.2238     | 3.8177   | transport protein                               |                         |    |    |   |   |   |   |
|          |                        |                      |         |         | 3.000   | 5.000   | 3.0000     | 8.2216   |                                                 |                         |    |    |   |   |   |   |
| SGO_0355 | 0.236                  | 5.496                | 0.0349  | 0.2222  | 10.000  | 6.000   | 10.4475    | 9.1624   | RNA methyltransferase, TrmH family, group 3     |                         |    |    |   |   |   |   |
|          |                        |                      |         |         | 14.000  | 7.000   | 14.0000    | 11.5102  |                                                 |                         |    |    |   |   |   |   |
| SGO_0357 | 0.351                  | 7.343                | 0.0025  | 0.0070  | 46.000  | 23.000  | 48.0586    | 35.1226  | degV; DegV family fatty acid binding protein    |                         |    |    |   |   |   |   |
|          |                        |                      |         |         | 43.000  | 22.000  | 43.0000    | 36.1750  |                                                 |                         |    |    |   |   |   |   |
| SGO_0358 | -0.321                 | 9.085                | 0.0082  | 0.0369  | 117.500 | 108.500 | 122.7584   | 165.6869 | rplM; ribosomal protein L13                     |                         |    |    |   |   |   |   |
|          |                        |                      |         |         | 118.000 | 83.000  | 118.0000   | 136.4782 |                                                 |                         |    |    |   |   |   |   |
| SGO_0359 | 0.184                  | 7.477                | 0.0730  | 0.5246  | 43.000  | 34.500  | 44.9244    | 52.6839  | rpsI; ribosomal protein S9                      |                         |    |    |   |   |   |   |
|          |                        |                      |         |         | 48.500  | 19.500  | 48.5000    | 32.0642  |                                                 |                         |    |    |   |   |   |   |
| SGO_0361 | -0.849                 | 4.222                | 0.0132  | 0.0679  | 4.000   | 3.000   | 4.1790     | 4.5812   | immunity repressor protein                      |                         |    |    |   |   |   |   |
|          |                        |                      |         |         | 2.500   | 4.500   | 2.5000     | 7.3994   |                                                 |                         |    |    |   |   |   |   |
| SGO_0372 | -0.545                 | 6.289                | 0.0048  | 0.0177  | 15.000  | 17.000  | 15.6713    | 25.9602  | malate oxidoreductase                           |                         |    |    |   |   |   |   |
|          |                        |                      |         |         | 16.000  | 12.500  | 16.0000    | 20.5539  |                                                 |                         |    |    |   |   |   |   |
| SGO_0374 | -0.908                 | 6.283                | 0.0019  | 0.0047  | 12.000  | 15.000  | 12.5370    | 22.9060  | Response regulator of the LytR/AlgR family      |                         |    |    |   |   |   |   |
|          |                        |                      |         |         | 14.500  | 17.000  | 14.5000    | 27.9534  |                                                 |                         |    |    |   |   |   |   |

 Show detected proteins only Show all proteinsProteins found:  
713 Filter by category:

ABC Transporter

Test

Cutoff

q-Value

.005

p-Value

|             | Signif | Direction | Applies To   |
|-------------|--------|-----------|--------------|
| Red         | yes    | +         | ratios, bars |
| Yellow      | no     | n/a       | bars         |
| Green       | yes    | -         | ratios, bars |
| Pink        | yes    | +         | p-, q-Values |
| Light Green | yes    | -         | p-, q-Values |

Dot Plots Dot Plots

Summary Table

SgFn vs Sg

SgPg vs Sg

SgPgFn vs Sg

SgPg vs SgFn

SgPgFn vs SgFn

SgPgFn vs SgPg

Coverage

SgPg vs SgFn

Raw

Normalized

Log<sub>2</sub> Ratios

| Protein  | SgPg vs SgFn           |                      |         |         | Raw     |         | Normalized |          | Description                                   | Log <sub>2</sub> Ratios |    |    |   |   |   |   |
|----------|------------------------|----------------------|---------|---------|---------|---------|------------|----------|-----------------------------------------------|-------------------------|----|----|---|---|---|---|
|          | Log <sub>2</sub> Ratio | Log <sub>2</sub> Sum | q-Value | p-Value | SgPg    | SgFn    | SgPg       | SgFn     |                                               | -6                      | -4 | -2 | 0 | 2 | 4 | 6 |
| SGO_0384 | -0.094                 | 5.081                | 0.0912  | 0.6706  | 6.500   | 4.500   | 6.7909     | 6.8718   | putative carboxylate-amine/thiol ligase       |                         |    |    |   |   |   |   |
|          |                        |                      |         |         | 9.500   | 6.500   | 9.5000     | 10.6881  |                                               |                         |    |    |   |   |   |   |
| SGO_0390 | -0.374                 | 8.298                | 0.0161  | 0.0876  | 72.000  | 66.500  | 75.2222    | 101.5501 | glycerol-3-phosphate dehydrogenase (NAD (P)+) |                         |    |    |   |   |   |   |
|          |                        |                      |         |         | 61.500  | 46.500  | 61.5000    | 76.4607  |                                               |                         |    |    |   |   |   |   |
| SGO_0392 | -0.946                 | 6.501                | 0.0011  | 0.0021  | 13.000  | 18.500  | 13.5818    | 28.2508  | phosphoglycerate mutase                       |                         |    |    |   |   |   |   |
|          |                        |                      |         |         | 17.500  | 19.000  | 17.5000    | 31.2420  |                                               |                         |    |    |   |   |   |   |
| SGO_0398 | -0.794                 | 4.991                | 0.0183  | 0.1028  | 7.500   | 5.000   | 7.8356     | 7.6353   | ABC transporter ATP-binding protein           |                         |    |    |   |   |   |   |
|          |                        |                      |         |         | 4.000   | 7.500   | 4.0000     | 12.3324  |                                               |                         |    |    |   |   |   |   |
| SGO_0401 | -0.561                 | 6.510                | 0.0076  | 0.0327  | 14.500  | 16.500  | 15.1489    | 25.1966  | grpE; co-chaperone GrpE                       |                         |    |    |   |   |   |   |
|          |                        |                      |         |         | 22.000  | 17.500  | 22.0000    | 28.7755  |                                               |                         |    |    |   |   |   |   |
| SGO_0402 | -0.741                 | 11.257               | 0.0002  | 0.0001  | 424.500 | 492.500 | 443.4974   | 752.0812 | dnaK; DnaK chaperone protein                  |                         |    |    |   |   |   |   |
|          |                        |                      |         |         | 473.000 | 474.000 | 473.0000   | 779.4058 |                                               |                         |    |    |   |   |   |   |
| SGO_0404 | -0.036                 | 6.073                | 0.0706  | 0.5026  | 16.000  | 10.500  | 16.7160    | 16.0342  | dnaJ; DnaJ chaperone protein                  |                         |    |    |   |   |   |   |
|          |                        |                      |         |         | 16.500  | 11.000  | 16.5000    | 18.0875  |                                               |                         |    |    |   |   |   |   |
| SGO_0407 | -1.686                 | 3.963                | 0.0161  | 0.0876  | 2.000   | 4.000   | 2.0895     | 6.1083   | truA; tRNA pseudouridine synthase A           |                         |    |    |   |   |   |   |
|          |                        |                      |         |         |         | 4.500   |            | 7.3994   |                                               |                         |    |    |   |   |   |   |
| SGO_0409 | -5.919                 | 8.682                | 0.0007  | 0.0010  | 3.500   | 115.000 | 3.6566     | 175.6129 | pyridoxine kinase                             |                         |    |    |   |   |   |   |
|          |                        |                      |         |         | 3.000   | 139.000 | 3.0000     | 228.5599 |                                               |                         |    |    |   |   |   |   |
| SGO_0411 | -4.261                 | 8.407                | 0.0072  | 0.0303  | 8.000   | 61.000  | 8.3580     | 93.1512  | conserved hypothetical protein TIGR01440      |                         |    |    |   |   |   |   |
|          |                        |                      |         |         | 7.000   | 140.500 | 7.0000     | 231.0264 |                                               |                         |    |    |   |   |   |   |
| SGO_0412 | 0.673                  | 10.654               | 0.0006  | 0.0008  | 463.000 | 216.500 | 483.7204   | 330.6103 | tig; trigger factor                           |                         |    |    |   |   |   |   |
|          |                        |                      |         |         | 506.000 | 177.000 | 506.0000   | 291.0439 |                                               |                         |    |    |   |   |   |   |
| SGO_0413 | -0.184                 | 7.251                | 0.0657  | 0.4612  | 27.000  | 25.000  | 28.2083    | 38.1767  | DNA-directed RNA polymerase delta chain       |                         |    |    |   |   |   |   |
|          |                        |                      |         |         | 44.000  | 25.500  | 44.0000    | 41.9301  |                                               |                         |    |    |   |   |   |   |

 Show detected proteins only Show all proteinsProteins found:  
713 Filter by category:

ABC Transporter

Test

Cutoff

q-Value

.005

p-Value

|             | Signif | Direction | Applies To   |
|-------------|--------|-----------|--------------|
| Red         | yes    | +         | ratios, bars |
| Yellow      | no     | n/a       | bars         |
| Green       | yes    | -         | ratios, bars |
| Pink        | yes    | +         | p-, q-Values |
| Light Green | yes    | -         | p-, q-Values |

Dot Plots Dot Plots

Summary Table

SgFn vs Sg

SgPg vs Sg

SgPgFn vs Sg

SgPg vs SgFn

SgPgFn vs SgFn

SgPgFn vs SgPg

Coverage

SgPg vs SgFn

Raw

Normalized

Log<sub>2</sub> Ratios

| Protein  | SgPg vs SgFn           |                      |         |         | Raw     |         | Normalized |          | Description                                            | Log <sub>2</sub> Ratios |    |    |   |   |   |   |
|----------|------------------------|----------------------|---------|---------|---------|---------|------------|----------|--------------------------------------------------------|-------------------------|----|----|---|---|---|---|
|          | Log <sub>2</sub> Ratio | Log <sub>2</sub> Sum | q-Value | p-Value | SgPg    | SgFn    | SgPg       | SgFn     |                                                        | -6                      | -4 | -2 | 0 | 2 | 4 | 6 |
| SGO_0415 | 0.090                  | 9.530                | 0.0349  | 0.2222  | 184.000 | 125.500 | 192.2344   | 191.6471 | secA; preprotein translocase, SecA subunit             |                         |    |    |   |   |   |   |
|          |                        |                      |         |         | 188.500 | 101.500 | 188.5000   | 166.8981 |                                                        |                         |    |    |   |   |   |   |
| SGO_0416 | -0.702                 | 7.428                | 0.0028  | 0.0085  | 37.000  | 35.000  | 38.6558    | 53.4474  | phospho-2-dehydro-3-deoxyheptonate aldolase            |                         |    |    |   |   |   |   |
|          |                        |                      |         |         | 27.500  | 32.000  | 27.5000    | 52.6181  |                                                        |                         |    |    |   |   |   |   |
| SGO_0418 | -1.405                 | 5.217                | 0.0004  | 0.0004  | 5.500   | 8.500   | 5.7461     | 12.9801  | alr; alanine racemase                                  |                         |    |    |   |   |   |   |
|          |                        |                      |         |         | 4.500   | 8.500   | 4.5000     | 13.9767  |                                                        |                         |    |    |   |   |   |   |
| SGO_0425 | -0.910                 | 3.396                |         |         | 3.500   | 4.500   | 3.6566     | 6.8718   | ansB; asparaginase                                     |                         |    |    |   |   |   |   |
|          |                        |                      |         |         |         |         |            |          |                                                        |                         |    |    |   |   |   |   |
| SGO_0426 | -1.201                 | 5.513                | 0.0025  | 0.0071  | 7.500   | 9.000   | 7.8356     | 13.7436  | Cof family protein                                     |                         |    |    |   |   |   |   |
|          |                        |                      |         |         | 6.000   | 11.000  | 6.0000     | 18.0875  |                                                        |                         |    |    |   |   |   |   |
| SGO_0427 | -1.809                 | 7.352                | 0.0008  | 0.0012  | 16.000  | 37.500  | 16.7160    | 57.2651  | universal stress protein family                        |                         |    |    |   |   |   |   |
|          |                        |                      |         |         | 19.500  | 42.500  | 19.5000    | 69.8834  |                                                        |                         |    |    |   |   |   |   |
| SGO_0429 | -0.121                 | 8.678                | 0.0795  | 0.5757  | 112.500 | 67.000  | 117.5346   | 102.3136 | aspartate transaminase                                 |                         |    |    |   |   |   |   |
|          |                        |                      |         |         | 80.500  | 66.500  | 80.5000    | 109.3470 |                                                        |                         |    |    |   |   |   |   |
| SGO_0431 | -0.204                 | 4.493                | 0.0326  | 0.2026  | 6.500   |         | 6.7909     |          | GTP-sensing transcriptional pleiotropic repressor codY |                         |    |    |   |   |   |   |
|          |                        |                      |         |         | 7.500   | 5.000   | 7.5000     | 8.2216   |                                                        |                         |    |    |   |   |   |   |
| SGO_0432 | 1.873                  | 6.100                | 0.0126  | 0.0633  | 31.000  |         | 32.3873    |          | entB; isochorismatase family protein                   |                         |    |    |   |   |   |   |
|          |                        |                      |         |         | 28.000  | 5.000   | 28.0000    | 8.2216   |                                                        |                         |    |    |   |   |   |   |
| SGO_0434 | 0.066                  | 6.756                | 0.1206  | 0.9195  | 23.000  | 13.000  | 24.0293    | 19.8519  | aspS-2; aspartyl-tRNA synthetase                       |                         |    |    |   |   |   |   |
|          |                        |                      |         |         | 30.500  | 20.500  | 30.5000    | 33.7085  |                                                        |                         |    |    |   |   |   |   |
| SGO_0435 | 0.055                  | 5.782                | 0.0639  | 0.4458  | 12.500  | 8.500   | 13.0594    | 12.9801  | gatC; glutamyl-tRNA(Gln) amidotransferase, C subunit   |                         |    |    |   |   |   |   |
|          |                        |                      |         |         | 15.000  | 8.500   | 15.0000    | 13.9767  |                                                        |                         |    |    |   |   |   |   |
| SGO_0436 | 0.568                  | 8.373                | 0.0013  | 0.0027  | 99.500  | 46.000  | 103.9529   | 70.2451  | gatA; glutamyl-tRNA(Gln) amidotransferase, A subunit   |                         |    |    |   |   |   |   |
|          |                        |                      |         |         | 94.000  | 38.500  | 94.0000    | 63.3062  |                                                        |                         |    |    |   |   |   |   |

- Show detected proteins only  
 Show all proteins

Proteins found:  
713

Filter by category:

ABC Transporter

Test

Cutoff

q-Value

.005

p-Value

|             | Signif | Direction | Applies To   |
|-------------|--------|-----------|--------------|
| Red         | yes    | +         | ratios, bars |
| Yellow      | no     | n/a       | bars         |
| Green       | yes    | -         | ratios, bars |
| Pink        | yes    | +         | p-, q-Values |
| Light Green | yes    | -         | p-, q-Values |

Dot Plots Dot Plots

Summary Table

SgFn vs Sg

SgPg vs Sg

SgPgFn vs Sg

SgPg vs SgFn

SgPgFn vs SgFn

SgPgFn vs SgPg

Coverage

| Protein  | SgPg vs SgFn           |                      |         |         | Raw     |        | Normalized |         | Description                                                    | Log <sub>2</sub> Ratios |    |    |   |   |
|----------|------------------------|----------------------|---------|---------|---------|--------|------------|---------|----------------------------------------------------------------|-------------------------|----|----|---|---|
|          | Log <sub>2</sub> Ratio | Log <sub>2</sub> Sum | q-Value | p-Value | SgPg    | SgFn   | SgPg       | SgFn    |                                                                | -6                      | -4 | -2 | 0 | 2 |
| SGO_0437 | 0.601                  | 8.467                | 0.0037  | 0.0121  | 95.000  | 52.000 | 99.2515    | 79.4076 | gatB; glutamyl-tRNA(Gln) amidotransferase, B subunit           |                         |    |    |   |   |
|          |                        |                      |         |         | 113.500 | 37.500 | 113.5000   | 61.6618 |                                                                |                         |    |    |   |   |
| SGO_0440 | -2.526                 | 6.782                | 0.0004  | 0.0003  | 9.000   | 28.500 | 9.4028     | 43.5215 | L-idoitol 2-dehydrogenase BH3949                               |                         |    |    |   |   |
|          |                        |                      |         |         | 7.000   | 30.500 | 7.0000     | 50.1516 |                                                                |                         |    |    |   |   |
| SGO_0445 | -0.617                 | 6.781                | 0.0019  | 0.0044  | 23.000  | 22.500 | 24.0293    | 34.3590 | GTP-binding protein                                            |                         |    |    |   |   |
|          |                        |                      |         |         | 19.500  | 19.500 | 19.5000    | 32.0642 |                                                                |                         |    |    |   |   |
| SGO_0447 | -1.713                 | 5.261                | 0.0044  | 0.0155  | 6.000   | 11.500 | 6.2685     | 17.5613 | nadD; nicotinate (nicotinamide) nucleotide adenylyltransferase |                         |    |    |   |   |
|          |                        |                      |         |         | 3.000   | 7.000  | 3.0000     | 11.5102 |                                                                |                         |    |    |   |   |
| SGO_0448 | -1.326                 | 5.495                | 0.0019  | 0.0046  | 6.500   | 12.000 | 6.7909     | 18.3248 | conserved hypothetical protein TIGR00488                       |                         |    |    |   |   |
|          |                        |                      |         |         | 6.000   | 8.500  | 6.0000     | 13.9767 |                                                                |                         |    |    |   |   |
| SGO_0450 | -0.570                 | 4.989                | 0.0013  | 0.0029  | 6.500   | 6.500  | 6.7909     | 9.9259  | iojap-related protein                                          |                         |    |    |   |   |
|          |                        |                      |         |         | 6.000   | 5.500  | 6.0000     | 9.0437  |                                                                |                         |    |    |   |   |
| SGO_0454 | 0.070                  | 7.311                | 0.1040  | 0.7740  | 37.500  | 21.000 | 39.1782    | 32.0684 | conserved hypothetical protein TIGR01033                       |                         |    |    |   |   |
|          |                        |                      |         |         | 41.500  | 28.000 | 41.5000    | 46.0408 |                                                                |                         |    |    |   |   |
| SGO_0455 | 2.829                  | 5.127                | 0.0111  | 0.0532  | 14.500  | 1.500  | 15.1489    | 2.2906  | lipoprotein, putative                                          |                         |    |    |   |   |
|          |                        |                      |         |         | 17.500  |        | 17.5000    |         |                                                                |                         |    |    |   |   |
| SGO_0457 | 1.359                  | 7.198                | 0.0002  | 0.0001  | 48.500  | 13.500 | 50.6705    | 20.6154 | ABC transporter, substrate-binding protein SP0148              |                         |    |    |   |   |
|          |                        |                      |         |         | 55.000  | 12.500 | 55.0000    | 20.5539 |                                                                |                         |    |    |   |   |
| SGO_0458 | 0.889                  | 8.708                | 0.0015  | 0.0034  | 128.000 | 56.500 | 133.7283   | 86.2794 | hlpA; lipoprotein                                              |                         |    |    |   |   |
|          |                        |                      |         |         | 136.500 | 37.500 | 136.5000   | 61.6618 |                                                                |                         |    |    |   |   |
| SGO_0459 | -1.303                 | 4.977                | 0.0023  | 0.0064  | 5.500   | 6.500  | 5.7461     | 9.9259  | succinyl-diaminopimelate desuccinylase                         |                         |    |    |   |   |
|          |                        |                      |         |         | 3.500   | 7.500  | 3.5000     | 12.3324 |                                                                |                         |    |    |   |   |
| SGO_0460 | 0.425                  | 5.479                | 0.0025  | 0.0072  | 13.000  | 6.000  | 13.5818    | 9.1624  | ABC transporter, ATP-binding protein SP0151                    |                         |    |    |   |   |
|          |                        |                      |         |         | 12.000  | 6.000  | 12.0000    | 9.8659  |                                                                |                         |    |    |   |   |

- Show detected proteins only
- Show all proteins

Proteins found: 713

Filter by category:

ABC Transporter

Test

Cutoff

q-Value

.005

p-Value

|  | Signif | Direction | Applies To   |
|--|--------|-----------|--------------|
|  | yes    | +         | ratios, bars |
|  | no     | n/a       | bars         |
|  | yes    | -         | ratios, bars |
|  | yes    | +         | p-, q-Values |
|  | yes    | -         | p-, q-Values |

Dot Plots Dot Plots

Summary Table

SgFn vs Sg

SgPg vs Sg

SgPgFn vs Sg

SgPg vs SgFn

SgPgFn vs SgFn

SgPgFn vs SgPg

Coverage

SgPg vs SgFn

Raw

Normalized

Log<sub>2</sub> Ratios

| Protein  | SgPg vs SgFn           |                      |         |         | Raw     |         | Normalized |          | Description                                            | Log <sub>2</sub> Ratios |    |    |   |   |
|----------|------------------------|----------------------|---------|---------|---------|---------|------------|----------|--------------------------------------------------------|-------------------------|----|----|---|---|
|          | Log <sub>2</sub> Ratio | Log <sub>2</sub> Sum | q-Value | p-Value | SgPg    | SgFn    | SgPg       | SgFn     |                                                        | -6                      | -4 | -2 | 0 | 2 |
| SGO_0468 | -1.602                 | 6.634                | 0.0051  | 0.0196  | 11.000  | 31.000  | 11.4923    | 47.3391  | hypothetical protein SGO_0468                          |                         |    |    |   |   |
|          |                        |                      |         |         | 12.500  | 17.000  | 12.5000    | 27.9534  |                                                        |                         |    |    |   |   |
| SGO_0476 | 2.521                  | 5.363                | 0.0119  | 0.0583  | 19.500  |         | 20.3727    |          | rhodanese family protein                               |                         |    |    |   |   |
|          |                        |                      |         |         | 17.500  | 2.000   | 17.5000    | 3.2886   |                                                        |                         |    |    |   |   |
| SGO_0480 | -4.542                 | 9.506                | 0.0050  | 0.0191  | 15.000  | 146.500 | 15.6713    | 223.7155 | hypothetical protein SGO_0480                          |                         |    |    |   |   |
|          |                        |                      |         |         | 12.500  | 289.000 | 12.5000    | 475.2073 |                                                        |                         |    |    |   |   |
| SGO_0483 | 0.245                  | 6.162                | 0.0367  | 0.2361  | 15.000  | 11.000  | 15.6713    | 16.7978  | hypothetical protein SGO_0483                          |                         |    |    |   |   |
|          |                        |                      |         |         | 23.500  | 9.500   | 23.5000    | 15.6210  |                                                        |                         |    |    |   |   |
| SGO_0488 | 0.160                  | 4.799                | 0.1077  | 0.8086  | 6.000   | 2.000   | 6.2685     | 3.0541   | ABC transporter, ATP-binding protein SP0483            |                         |    |    |   |   |
|          |                        |                      |         |         | 7.000   | 7.000   | 7.0000     | 11.5102  |                                                        |                         |    |    |   |   |
| SGO_0491 | -1.048                 | 4.414                | 0.0033  | 0.0108  | 2.500   | 5.000   | 2.6119     | 7.6353   | gidB; methyltransferase GidB                           |                         |    |    |   |   |
|          |                        |                      |         |         | 4.500   | 4.000   | 4.5000     | 6.5773   |                                                        |                         |    |    |   |   |
| SGO_0494 | -2.354                 | 7.679                | 0.0013  | 0.0025  | 16.500  | 64.500  | 17.2384    | 98.4959  | lemA; LemA-like protein                                |                         |    |    |   |   |
|          |                        |                      |         |         | 16.000  | 44.500  | 16.0000    | 73.1721  |                                                        |                         |    |    |   |   |
| SGO_0495 | -0.838                 | 4.717                | 0.0118  | 0.0577  | 5.500   | 7.000   | 5.7461     | 10.6895  | htpx; heat shock protein                               |                         |    |    |   |   |
|          |                        |                      |         |         |         | 6.000   |            | 9.8659   |                                                        |                         |    |    |   |   |
| SGO_0501 | 2.358                  | 5.796                | 0.0062  | 0.0253  | 25.000  |         | 26.1188    |          | Uncharacterized ACR, COG1399                           |                         |    |    |   |   |
|          |                        |                      |         |         | 24.500  | 3.000   | 24.5000    | 4.9329   |                                                        |                         |    |    |   |   |
| SGO_0502 | 1.192                  | 8.502                | 0.0023  | 0.0064  | 133.000 | 44.000  | 138.9521   | 67.1910  | floL; flotillin-like protein                           |                         |    |    |   |   |
|          |                        |                      |         |         | 112.000 | 27.000  | 112.0000   | 44.3965  |                                                        |                         |    |    |   |   |
| SGO_0503 | -0.832                 | 11.295               | 0.0004  | 0.0003  | 420.000 | 545.500 | 438.7960   | 833.0158 | gnd; 6-phosphogluconate dehydrogenase, decarboxylating |                         |    |    |   |   |
|          |                        |                      |         |         | 465.000 | 472.000 | 465.0000   | 776.1171 |                                                        |                         |    |    |   |   |
| SGO_0505 | 0.210                  | 7.872                | 0.0512  | 0.3479  | 53.500  | 42.500  | 55.8943    | 64.9004  | PTS system, IIBC component                             |                         |    |    |   |   |
|          |                        |                      |         |         | 69.000  | 27.000  | 69.0000    | 44.3965  |                                                        |                         |    |    |   |   |

- Show detected proteins only  
 Show all proteins

Proteins found:  
713

Filter by category:

ABC Transporter

Test

Cutoff

q-Value

.005

p-Value

|             | Signif | Direction | Applies To   |
|-------------|--------|-----------|--------------|
| Red         | yes    | +         | ratios, bars |
| Yellow      | no     | n/a       | bars         |
| Green       | yes    | -         | ratios, bars |
| Pink        | yes    | +         | p-, q-Values |
| Light Green | yes    | -         | p-, q-Values |

Dot Plots Dot Plots

Summary Table

SgFn vs Sg

SgPg vs Sg

SgPgFn vs Sg

SgPg vs SgFn

SgPgFn vs SgFn

SgPgFn vs SgPg

Coverage

SgPg vs SgFn

Raw

Normalized

Log<sub>2</sub> Ratios

| Protein  | SgPg vs SgFn           |                      |         |         | Raw    |        | Normalized |          | Description                                                   | Log <sub>2</sub> Ratios |    |    |   |   |   |   |
|----------|------------------------|----------------------|---------|---------|--------|--------|------------|----------|---------------------------------------------------------------|-------------------------|----|----|---|---|---|---|
|          | Log <sub>2</sub> Ratio | Log <sub>2</sub> Sum | q-Value | p-Value | SgPg   | SgFn   | SgPg       | SgFn     |                                                               | -6                      | -4 | -2 | 0 | 2 | 4 | 6 |
| SGO_0508 | -0.087                 | 5.228                | 0.0712  | 0.5085  | 11.000 | 8.500  | 11.4923    | 12.9801  | nrdR; transcriptional regulator, NrdR family                  |                         |    |    |   |   |   |   |
|          |                        |                      |         |         | 13.000 |        | 13.0000    |          |                                                               |                         |    |    |   |   |   |   |
| SGO_0510 | 0.348                  | 6.032                | 0.0275  | 0.1659  | 19.000 | 11.500 | 19.8503    | 17.5613  | dnaI; primosomal protein DnaI                                 |                         |    |    |   |   |   |   |
|          |                        |                      |         |         | 16.500 | 7.000  | 16.5000    | 11.5102  |                                                               |                         |    |    |   |   |   |   |
| SGO_0511 | -1.112                 | 5.300                | 0.0054  | 0.0209  | 6.000  | 7.000  | 6.2685     | 10.6895  | NADPH-flavin oxidoreductase -like protein                     |                         |    |    |   |   |   |   |
|          |                        |                      |         |         | 6.000  | 10.000 | 6.0000     | 16.4432  |                                                               |                         |    |    |   |   |   |   |
| SGO_0512 | 0.329                  | 7.571                | 0.0043  | 0.0149  | 50.000 | 30.000 | 52.2376    | 45.8121  | GTP-binding protein engA                                      |                         |    |    |   |   |   |   |
|          |                        |                      |         |         | 53.500 | 23.500 | 53.5000    | 38.6414  |                                                               |                         |    |    |   |   |   |   |
| SGO_0515 | -0.507                 | 8.288                | 0.0038  | 0.0126  | 61.500 | 66.000 | 64.2523    | 100.7865 | murC; UDP-N-acetylmuramate--alanine ligase                    |                         |    |    |   |   |   |   |
|          |                        |                      |         |         | 64.500 | 50.500 | 64.5000    | 83.0380  |                                                               |                         |    |    |   |   |   |   |
| SGO_0518 | 1.227                  | 6.988                | 0.0002  | 0.0001  | 44.000 | 12.500 | 45.9691    | 19.0884  | aminodeoxychorismate lyase-like protein                       |                         |    |    |   |   |   |   |
|          |                        |                      |         |         | 43.000 | 11.500 | 43.0000    | 18.9096  |                                                               |                         |    |    |   |   |   |   |
| SGO_0519 | 0.476                  | 6.929                | 0.0132  | 0.0679  | 38.000 | 19.500 | 39.7006    | 29.7778  | greA; transcription elongation factor greA                    |                         |    |    |   |   |   |   |
|          |                        |                      |         |         | 31.000 | 13.000 | 31.0000    | 21.3761  |                                                               |                         |    |    |   |   |   |   |
| SGO_0521 | -0.509                 | 4.706                | 0.0488  | 0.3295  | 9.000  | 7.000  | 9.4028     | 10.6895  | Membrane protein oxaA 2 precursor                             |                         |    |    |   |   |   |   |
|          |                        |                      |         |         | 6.000  |        | 6.0000     |          |                                                               |                         |    |    |   |   |   |   |
| SGO_0523 | -1.995                 | 6.366                | 0.0002  | 0.0001  | 6.500  | 21.500 | 6.7909     | 32.8320  | spoU rRNA Methylase family protein                            |                         |    |    |   |   |   |   |
|          |                        |                      |         |         | 10.000 | 20.000 | 10.0000    | 32.8863  |                                                               |                         |    |    |   |   |   |   |
| SGO_0526 | 0.264                  | 5.998                | 0.0611  | 0.4254  | 18.000 | 7.000  | 18.8055    | 10.6895  | ilvB; acetolactate synthase, large subunit, biosynthetic type |                         |    |    |   |   |   |   |
|          |                        |                      |         |         | 15.500 | 11.500 | 15.5000    | 18.9096  |                                                               |                         |    |    |   |   |   |   |
| SGO_0527 | -0.403                 | 5.078                | 0.0196  | 0.1122  | 5.500  | 6.000  | 5.7461     | 9.1624   | ilvN; acetolactate synthase, small subunit                    |                         |    |    |   |   |   |   |
|          |                        |                      |         |         | 9.000  | 6.000  | 9.0000     | 9.8659   |                                                               |                         |    |    |   |   |   |   |
| SGO_0528 | -0.445                 | 8.520                | 0.0078  | 0.0339  | 79.000 | 77.500 | 82.5354    | 118.3478 | ilvC; ketol-acid reductoisomerase                             |                         |    |    |   |   |   |   |
|          |                        |                      |         |         | 72.500 | 57.000 | 72.5000    | 93.7260  |                                                               |                         |    |    |   |   |   |   |

- Show detected proteins only  
 Show all proteins

Proteins found:  
713

Filter by category:

ABC Transporter

Test

Cutoff

q-Value

.005

p-Value

|             | Signif | Direction | Applies To   |
|-------------|--------|-----------|--------------|
| Red         | yes    | +         | ratios, bars |
| Yellow      | no     | n/a       | bars         |
| Green       | yes    | -         | ratios, bars |
| Pink        | yes    | +         | p-, q-Values |
| Light Green | yes    | -         | p-, q-Values |

Dot Plots Dot Plots

Summary Table

SgFn vs Sg

SgPg vs Sg

SgPgFn vs Sg

SgPg vs SgFn

SgPgFn vs SgFn

SgPgFn vs SgPg

Coverage

| Protein  | SgPg vs SgFn           |                      |         |         | Raw    |        | Normalized |         | Description                                       | Log <sub>2</sub> Ratios |    |    |   |   |
|----------|------------------------|----------------------|---------|---------|--------|--------|------------|---------|---------------------------------------------------|-------------------------|----|----|---|---|
|          | Log <sub>2</sub> Ratio | Log <sub>2</sub> Sum | q-Value | p-Value | SgPg   | SgFn   | SgPg       | SgFn    |                                                   | -6                      | -4 | -2 | 0 | 2 |
| SGO_0529 | -0.507                 | 4.959                | 0.0259  | 0.1541  | 5.000  | 4.500  | 5.2238     | 6.8718  | ilvA; threonine dehydratase                       |                         |    |    |   |   |
|          |                        |                      |         |         | 7.500  | 7.000  | 7.5000     | 11.5102 |                                                   |                         |    |    |   |   |
| SGO_0530 | -0.849                 | 4.253                | 0.0220  | 0.1276  | 2.000  | 3.000  | 2.0895     | 4.5812  | Cof family protein                                |                         |    |    |   |   |
|          |                        |                      |         |         | 5.000  | 4.500  | 5.0000     | 7.3994  |                                                   |                         |    |    |   |   |
| SGO_0533 | -1.611                 | 3.019                |         |         |        | 4.000  |            | 6.1083  | conserved hypothetical protein TIGR00150          |                         |    |    |   |   |
|          |                        |                      |         |         | 2.000  |        | 2.0000     |         |                                                   |                         |    |    |   |   |
| SGO_0535 | 0.257                  | 4.384                | 0.0652  | 0.4574  | 6.000  | 4.000  | 6.2685     | 6.1083  | putative transcriptional regulator LytR           |                         |    |    |   |   |
|          |                        |                      |         |         | 8.500  |        | 8.5000     |         |                                                   |                         |    |    |   |   |
| SGO_0537 | -0.118                 | 6.485                | 0.0126  | 0.0637  | 20.500 | 16.000 | 21.4174    | 24.4331 | HIT family protein                                |                         |    |    |   |   |
|          |                        |                      |         |         | 21.500 | 13.500 | 21.5000    | 22.1983 |                                                   |                         |    |    |   |   |
| SGO_0538 | -1.633                 | 5.245                | 0.0054  | 0.0210  | 3.500  | 7.000  | 3.6566     | 10.6895 | ABC transporter, ATP-binding protein SP0522       |                         |    |    |   |   |
|          |                        |                      |         |         | 5.500  | 11.000 | 5.5000     | 18.0875 |                                                   |                         |    |    |   |   |
| SGO_0540 | -0.986                 | 7.348                | 0.0004  | 0.0003  | 25.500 | 37.000 | 26.6412    | 56.5015 | hypothetical protein SGO_0540                     |                         |    |    |   |   |
|          |                        |                      |         |         | 28.000 | 31.500 | 28.0000    | 51.7960 |                                                   |                         |    |    |   |   |
| SGO_0541 | -1.057                 | 4.580                | 0.0057  | 0.0224  | 2.500  | 5.500  | 2.6119     | 8.3989  | methyltransferase, putative                       |                         |    |    |   |   |
|          |                        |                      |         |         | 5.500  | 4.500  | 5.5000     | 7.3994  |                                                   |                         |    |    |   |   |
| SGO_0543 | 1.107                  | 6.991                | 0.0000  | 0.0000  | 42.000 | 13.500 | 43.8796    | 20.6154 | nusA; transcription termination factor NusA       |                         |    |    |   |   |
|          |                        |                      |         |         | 43.000 | 12.000 | 43.0000    | 19.7318 |                                                   |                         |    |    |   |   |
| SGO_0546 | 0.170                  | 8.171                | 0.0265  | 0.1583  | 77.500 | 40.500 | 80.9683    | 61.8463 | infB; Translation initiation factor IF-2          |                         |    |    |   |   |
|          |                        |                      |         |         | 71.500 | 45.000 | 71.5000    | 73.9942 |                                                   |                         |    |    |   |   |
| SGO_0548 | 1.438                  | 4.402                | 0.0127  | 0.0642  | 8.000  |        | 8.3580     |         | Na/Pi-cotransporter family protein                |                         |    |    |   |   |
|          |                        |                      |         |         | 9.500  | 2.000  | 9.5000     | 3.2886  |                                                   |                         |    |    |   |   |
| SGO_0549 | 3.912                  | 5.200                |         |         | 33.000 | 1.500  | 34.4768    | 2.2906  | nagA; N-acetylglucosamine-6-phosphate deacetylase |                         |    |    |   |   |
|          |                        |                      |         |         |        |        |            |         |                                                   |                         |    |    |   |   |

- Show detected proteins only
- Show all proteins

Proteins found: 713

Filter by category:

ABC Transporter

Test

Cutoff

q-Value

.005

p-Value

|             | Signif | Direction | Applies To   |
|-------------|--------|-----------|--------------|
| Red         | yes    | +         | ratios, bars |
| Yellow      | no     | n/a       | bars         |
| Green       | yes    | -         | ratios, bars |
| Pink        | yes    | +         | p-, q-Values |
| Light Green | yes    | -         | p-, q-Values |

Dot Plots Dot Plots

Summary Table

SgFn vs Sg

SgPg vs Sg

SgPgFn vs Sg

SgPg vs SgFn

SgPgFn vs SgFn

SgPgFn vs SgPg

Coverage

| Protein  | SgPg vs SgFn           |                      |         |         | Raw    |         | Normalized |          | Description                                             | Log <sub>2</sub> Ratios |    |    |   |   |   |   |
|----------|------------------------|----------------------|---------|---------|--------|---------|------------|----------|---------------------------------------------------------|-------------------------|----|----|---|---|---|---|
|          | Log <sub>2</sub> Ratio | Log <sub>2</sub> Sum | q-Value | p-Value | SgPg   | SgFn    | SgPg       | SgFn     |                                                         | -6                      | -4 | -2 | 0 | 2 | 4 | 6 |
| SGO_0552 | -0.752                 | 7.028                | 0.0022  | 0.0058  | 22.500 | 29.500  | 23.5069    | 45.0485  | oxidoreductase, aldo/keto reductase family              |                         |    |    |   |   |   |   |
|          |                        |                      |         |         | 25.000 | 22.500  | 25.0000    | 36.9971  |                                                         |                         |    |    |   |   |   |   |
| SGO_0554 | -1.018                 | 6.007                | 0.0028  | 0.0083  | 8.500  | 12.500  | 8.8804     | 19.0884  | hsdR; type I site-specific deoxyribonuclease            |                         |    |    |   |   |   |   |
|          |                        |                      |         |         | 12.500 | 14.500  | 12.5000    | 23.8426  |                                                         |                         |    |    |   |   |   |   |
| SGO_0558 | -0.137                 | 3.826                | 0.1100  | 0.8286  | 5.500  |         | 5.7461     |          | hypothetical protein SGO_0558                           |                         |    |    |   |   |   |   |
|          |                        |                      |         |         | 3.500  | 3.000   | 3.5000     | 4.9329   |                                                         |                         |    |    |   |   |   |   |
| SGO_0560 | 2.120                  | 4.582                | 0.0118  | 0.0572  | 11.000 |         | 11.4923    |          | hsdM; type I restriction-modification system, M subunit |                         |    |    |   |   |   |   |
|          |                        |                      |         |         | 10.000 | 1.500   | 10.0000    | 2.4665   |                                                         |                         |    |    |   |   |   |   |
| SGO_0565 | -1.797                 | 8.825                | 0.0009  | 0.0015  | 45.500 | 128.000 | 47.5362    | 195.4648 | adhA; alcohol dehydrogenase                             |                         |    |    |   |   |   |   |
|          |                        |                      |         |         | 53.500 | 95.500  | 53.5000    | 157.0322 |                                                         |                         |    |    |   |   |   |   |
| SGO_0568 | 1.448                  | 6.209                | 0.0014  | 0.0031  | 24.000 | 8.500   | 25.0741    | 12.9801  | glyQ; glycyl-tRNA synthetase, alpha subunit             |                         |    |    |   |   |   |   |
|          |                        |                      |         |         | 28.500 | 4.500   | 28.5000    | 7.3994   |                                                         |                         |    |    |   |   |   |   |
| SGO_0569 | 0.084                  | 8.115                | 0.0814  | 0.5918  | 67.000 | 38.000  | 69.9984    | 58.0286  | glyS; glycyl-tRNA synthetase, beta subunit              |                         |    |    |   |   |   |   |
|          |                        |                      |         |         | 72.000 | 47.000  | 72.0000    | 77.2828  |                                                         |                         |    |    |   |   |   |   |
| SGO_0573 | -0.176                 | 6.126                | 0.0588  | 0.4067  | 16.000 | 15.500  | 16.7160    | 23.6696  | mraW; S-adenosyl-methyltransferase MraW                 |                         |    |    |   |   |   |   |
|          |                        |                      |         |         | 15.500 | 8.500   | 15.5000    | 13.9767  |                                                         |                         |    |    |   |   |   |   |
| SGO_0577 | 0.804                  | 6.796                | 0.0075  | 0.0319  | 35.500 | 17.500  | 37.0887    | 26.7237  | ATP-dependent RNA helicase                              |                         |    |    |   |   |   |   |
|          |                        |                      |         |         | 32.500 | 9.000   | 32.5000    | 14.7988  |                                                         |                         |    |    |   |   |   |   |
| SGO_0579 | 0.718                  | 4.668                | 0.0075  | 0.0323  | 9.000  | 3.000   | 9.4028     | 4.5812   | amino acid ABC transporter ATP binding protein          |                         |    |    |   |   |   |   |
|          |                        |                      |         |         | 6.500  | 3.000   | 6.5000     | 4.9329   |                                                         |                         |    |    |   |   |   |   |
| SGO_0581 | 1.121                  | 5.490                | 0.0046  | 0.0168  | 12.500 | 3.500   | 13.0594    | 5.3447   | trxB; thioredoxin-disulfide reductase                   |                         |    |    |   |   |   |   |
|          |                        |                      |         |         | 17.500 | 5.500   | 17.5000    | 9.0437   |                                                         |                         |    |    |   |   |   |   |
| SGO_0582 | -1.346                 | 8.699                | 0.0006  | 0.0007  | 47.000 | 96.000  | 49.1034    | 146.5986 | nicotinate phosphoribosyltransferase, putative          |                         |    |    |   |   |   |   |
|          |                        |                      |         |         | 69.500 | 91.500  | 69.5000    | 150.4549 |                                                         |                         |    |    |   |   |   |   |

- Show detected proteins only
- Show all proteins

Proteins found: 713

Filter by category:

ABC Transporter

Test

Cutoff

q-Value

.005

p-Value

|             | Signif | Direction | Applies To   |
|-------------|--------|-----------|--------------|
| Red         | yes    | +         | ratios, bars |
| Yellow      | no     | n/a       | bars         |
| Green       | yes    | -         | ratios, bars |
| Pink        | yes    | +         | p-, q-Values |
| Light Green | yes    | -         | p-, q-Values |

Dot Plots Dot Plots



Summary Table SgFn vs Sg SgPg vs Sg SgPgFn vs Sg SgPg vs SgFn SgPgFn vs SgFn SgPgFn vs SgPg Coverage

| Protein  | SgPg vs SgFn           |                      |         |         | Raw    |        | Normalized |          | Description                                 | Log <sub>2</sub> Ratios |    |    |   |   |
|----------|------------------------|----------------------|---------|---------|--------|--------|------------|----------|---------------------------------------------|-------------------------|----|----|---|---|
|          | Log <sub>2</sub> Ratio | Log <sub>2</sub> Sum | q-Value | p-Value | SgPg   | SgFn   | SgPg       | SgFn     |                                             | -6                      | -4 | -2 | 0 | 2 |
| SGO_0583 | -0.967                 | 6.490                | 0.0045  | 0.0163  | 14.000 | 23.000 | 14.6265    | 35.1226  | nadE; NAD+ synthetase                       |                         |    |    |   |   |
|          |                        |                      |         |         | 15.500 | 15.000 | 15.5000    | 24.6647  |                                             |                         |    |    |   |   |
| SGO_0585 | -1.956                 | 8.313                | 0.0004  | 0.0004  | 36.000 | 77.500 | 37.6111    | 118.3478 | pepC; aminopeptidase C                      |                         |    |    |   |   |
|          |                        |                      |         |         | 28.000 | 81.500 | 28.0000    | 134.0117 |                                             |                         |    |    |   |   |
| SGO_0586 | 0.341                  | 7.309                | 0.0144  | 0.0754  | 47.000 | 20.500 | 49.1034    | 31.3049  | pbp1a; penicillin-binding protein 1A        |                         |    |    |   |   |
|          |                        |                      |         |         | 39.500 | 23.500 | 39.5000    | 38.6414  |                                             |                         |    |    |   |   |
| SGO_0589 | -0.571                 | 7.688                | 0.0196  | 0.1119  | 31.500 | 49.000 | 32.9097    | 74.8264  | methylase                                   |                         |    |    |   |   |
|          |                        |                      |         |         | 50.000 | 29.500 | 50.0000    | 48.5073  |                                             |                         |    |    |   |   |
| SGO_0590 | -0.895                 | 5.577                | 0.0044  | 0.0159  | 10.000 | 11.000 | 10.4475    | 16.7978  | Methyltransferase                           |                         |    |    |   |   |
|          |                        |                      |         |         | 6.500  | 8.500  | 6.5000     | 13.9767  |                                             |                         |    |    |   |   |
| SGO_0591 | -0.081                 | 6.773                | 0.0005  | 0.0005  | 25.500 | 18.500 | 26.6412    | 28.2508  | hypothetical protein SGO_0591               |                         |    |    |   |   |
|          |                        |                      |         |         | 26.500 | 17.000 | 26.5000    | 27.9534  |                                             |                         |    |    |   |   |
| SGO_0592 | 0.401                  | 5.626                | 0.0027  | 0.0078  | 13.000 | 7.500  | 13.5818    | 11.4530  | luxS; autoinducer-2 production protein LuxS |                         |    |    |   |   |
|          |                        |                      |         |         | 14.500 | 6.000  | 14.5000    | 9.8659   |                                             |                         |    |    |   |   |
| SGO_0593 | 1.189                  | 6.701                | 0.0013  | 0.0027  | 37.500 | 9.000  | 39.1782    | 13.7436  | HD/KH domain protein                        |                         |    |    |   |   |
|          |                        |                      |         |         | 33.000 | 11.000 | 33.0000    | 18.0875  |                                             |                         |    |    |   |   |
| SGO_0594 | -0.633                 | 6.078                | 0.0028  | 0.0086  | 11.500 | 14.500 | 12.0147    | 22.1425  | gmk; Guanylate kinase (GMP kinase)          |                         |    |    |   |   |
|          |                        |                      |         |         | 14.500 | 11.500 | 14.5000    | 18.9096  |                                             |                         |    |    |   |   |
| SGO_0595 | 0.997                  | 6.131                | 0.0011  | 0.0021  | 22.000 | 9.000  | 22.9846    | 13.7436  | DNA-directed RNA polymerase, omega subunit  |                         |    |    |   |   |
|          |                        |                      |         |         | 23.500 | 6.000  | 23.5000    | 9.8659   |                                             |                         |    |    |   |   |
| SGO_0597 | -0.682                 | 6.173                | 0.0032  | 0.0104  | 14.000 | 13.000 | 14.6265    | 19.8519  | fmt; methionyl-tRNA formyltransferase       |                         |    |    |   |   |
|          |                        |                      |         |         | 13.000 | 15.000 | 13.0000    | 24.6647  |                                             |                         |    |    |   |   |
| SGO_0598 | 0.150                  | 4.423                | 0.0894  | 0.6563  | 8.500  |        | 8.8804     |          | sun; sun protein                            |                         |    |    |   |   |
|          |                        |                      |         |         | 6.000  | 4.000  | 6.0000     | 6.5773   |                                             |                         |    |    |   |   |

- Show detected proteins only
- Show all proteins

Proteins found: 713

Filter by category:  
ABC Transporter

Test Cutoff

q-Value

.005

p-Value

|             | Signif | Direction | Applies To   |
|-------------|--------|-----------|--------------|
| Red         | yes    | +         | ratios, bars |
| Yellow      | no     | n/a       | bars         |
| Green       | yes    | -         | ratios, bars |
| Pink        | yes    | +         | p-, q-Values |
| Light Green | yes    | -         | p-, q-Values |

Dot Plots Dot Plots

Summary Table

SgFn vs Sg

SgPg vs Sg

SgPgFn vs Sg

SgPg vs SgFn

SgPgFn vs SgFn

SgPgFn vs SgPg

Coverage

SgPg vs SgFn

Raw

Normalized

Log<sub>2</sub> Ratios

| Protein  | SgPg vs SgFn           |                      |         |         | Raw     |        | Normalized |          | Description                                                                                   | Log <sub>2</sub> Ratios |    |    |   |   |
|----------|------------------------|----------------------|---------|---------|---------|--------|------------|----------|-----------------------------------------------------------------------------------------------|-------------------------|----|----|---|---|
|          | Log <sub>2</sub> Ratio | Log <sub>2</sub> Sum | q-Value | p-Value | SgPg    | SgFn   | SgPg       | SgFn     |                                                                                               | -6                      | -4 | -2 | 0 | 2 |
| SGO_0599 | -1.709                 | 7.255                | 0.0004  | 0.0003  | 18.500  | 40.500 | 19.3279    | 61.8463  | phosphoprotein phosphatase                                                                    |                         |    |    |   |   |
|          |                        |                      |         |         | 16.500  | 33.500 | 16.5000    | 55.0846  |                                                                                               |                         |    |    |   |   |
| SGO_0600 | -0.306                 | 6.059                | 0.0240  | 0.1406  | 15.500  | 14.000 | 16.1937    | 21.3790  | serine/threonine protein kinase                                                               |                         |    |    |   |   |
|          |                        |                      |         |         | 13.500  | 9.500  | 13.5000    | 15.6210  |                                                                                               |                         |    |    |   |   |
| SGO_0603 | -1.375                 | 4.866                | 0.0031  | 0.0096  | 2.500   | 7.000  | 2.6119     | 10.6895  | response regulator                                                                            |                         |    |    |   |   |
|          |                        |                      |         |         | 6.000   | 6.000  | 6.0000     | 9.8659   |                                                                                               |                         |    |    |   |   |
| SGO_0604 | -1.206                 | 8.588                | 0.0001  | 0.0000  | 54.000  | 87.000 | 56.4166    | 132.8550 | hydrolase, haloacid dehalogenase family/peptidyl-prolyl cis-trans isomerase, cyclophilin type |                         |    |    |   |   |
|          |                        |                      |         |         | 60.000  | 82.500 | 60.0000    | 135.6561 |                                                                                               |                         |    |    |   |   |
| SGO_0606 | 0.287                  | 8.481                | 0.0032  | 0.0103  | 89.000  | 52.000 | 92.9830    | 79.4076  | cysK; cysteine synthase A                                                                     |                         |    |    |   |   |
|          |                        |                      |         |         | 103.500 | 49.500 | 103.5000   | 81.3936  |                                                                                               |                         |    |    |   |   |
| SGO_0610 | -0.434                 | 8.621                | 0.0095  | 0.0444  | 84.500  | 84.000 | 88.2816    | 128.2737 | ribosomal subunit interface protein                                                           |                         |    |    |   |   |
|          |                        |                      |         |         | 78.500  | 60.000 | 78.5000    | 98.6590  |                                                                                               |                         |    |    |   |   |
| SGO_0626 | 0.400                  | 4.071                | 0.0495  | 0.3347  | 5.000   | 3.000  | 5.2238     | 4.5812   | recX; Regulatory protein recX                                                                 |                         |    |    |   |   |
|          |                        |                      |         |         | 7.000   |        | 7.0000     |          |                                                                                               |                         |    |    |   |   |
| SGO_0631 | 2.906                  | 5.932                | 0.0044  | 0.0161  | 28.000  | 2.500  | 29.2531    | 3.8177   | alpha-glycerophosphate oxidase                                                                |                         |    |    |   |   |
|          |                        |                      |         |         | 28.000  |        | 28.0000    |          |                                                                                               |                         |    |    |   |   |
| SGO_0639 | 0.330                  | 7.771                | 0.0060  | 0.0237  | 55.500  | 29.000 | 57.9838    | 44.2850  | valS; valyl-tRNA synthetase                                                                   |                         |    |    |   |   |
|          |                        |                      |         |         | 63.500  | 32.000 | 63.5000    | 52.6181  |                                                                                               |                         |    |    |   |   |
| SGO_0641 | 0.081                  | 6.473                | 0.0774  | 0.5594  | 22.500  | 16.000 | 23.5069    | 24.4331  | ATPase, histidine kinase-, DNA gyrase B-, and HSP90-like domain protein protein               |                         |    |    |   |   |
|          |                        |                      |         |         | 22.000  | 11.500 | 22.0000    | 18.9096  |                                                                                               |                         |    |    |   |   |
| SGO_0642 | 0.432                  | 5.530                | 0.0425  | 0.2821  | 15.000  | 4.500  | 15.6713    | 6.8718   | hypothetical protein SGO_0642                                                                 |                         |    |    |   |   |
|          |                        |                      |         |         | 10.500  | 8.000  | 10.5000    | 13.1545  |                                                                                               |                         |    |    |   |   |
| SGO_0643 | -1.201                 | 4.722                | 0.0021  | 0.0051  | 3.000   | 5.500  | 3.1343     | 8.3989   | cytosine-specific methyltransferase                                                           |                         |    |    |   |   |
|          |                        |                      |         |         | 5.000   | 6.000  | 5.0000     | 9.8659   |                                                                                               |                         |    |    |   |   |

- Show detected proteins only  
 Show all proteins

Proteins found:  
713

Filter by category:

ABC Transporter

Test

Cutoff

q-Value

.005

p-Value

|             | Signif | Direction | Applies To   |
|-------------|--------|-----------|--------------|
| Red         | yes    | +         | ratios, bars |
| Yellow      | no     | n/a       | bars         |
| Green       | yes    | -         | ratios, bars |
| Pink        | yes    | +         | p-, q-Values |
| Light Green | yes    | -         | p-, q-Values |

Dot Plots Dot Plots

Summary Table

SgFn vs Sg

SgPg vs Sg

SgPgFn vs Sg

SgPg vs SgFn

SgPgFn vs SgFn

SgPgFn vs SgPg

Coverage

| Protein  | SgPg vs SgFn           |                      |         |         | Raw     |         | Normalized |          | Description                                                            | Log <sub>2</sub> Ratios |    |    |   |   |
|----------|------------------------|----------------------|---------|---------|---------|---------|------------|----------|------------------------------------------------------------------------|-------------------------|----|----|---|---|
|          | Log <sub>2</sub> Ratio | Log <sub>2</sub> Sum | q-Value | p-Value | SgPg    | SgFn    | SgPg       | SgFn     |                                                                        | -6                      | -4 | -2 | 0 | 2 |
| SGO_0644 | 1.467                  | 6.326                | 0.0028  | 0.0083  | 33.000  | 8.000   | 34.4768    | 12.2165  | hypothetical protein SGO_0644                                          |                         |    |    |   |   |
|          |                        |                      |         |         | 24.500  | 5.500   | 24.5000    | 9.0437   |                                                                        |                         |    |    |   |   |
| SGO_0652 | 0.057                  | 3.991                | 0.0810  | 0.5877  | 6.500   | 2.500   | 6.7909     | 3.8177   | hypothetical protein SGO_0652                                          |                         |    |    |   |   |
|          |                        |                      |         |         | 2.000   | 2.000   | 2.0000     | 3.2886   |                                                                        |                         |    |    |   |   |
| SGO_0654 | 2.498                  | 6.237                | 0.0141  | 0.0739  | 30.000  | 4.000   | 31.3426    | 6.1083   | radical SAM enzyme, Cfr family                                         |                         |    |    |   |   |
|          |                        |                      |         |         | 38.000  |         | 38.0000    |          |                                                                        |                         |    |    |   |   |
| SGO_0656 | -1.633                 | 5.978                | 0.0164  | 0.0904  | 7.500   | 8.000   | 7.8356     | 12.2165  | trpB-2; tryptophan synthase, beta subunit                              |                         |    |    |   |   |
|          |                        |                      |         |         | 6.000   | 22.500  | 6.0000     | 36.9971  |                                                                        |                         |    |    |   |   |
| SGO_0665 | 0.384                  | 9.366                | 0.0119  | 0.0585  | 165.000 | 107.500 | 172.3842   | 164.1599 | non-heme iron-containing ferritin                                      |                         |    |    |   |   |
|          |                        |                      |         |         | 200.000 | 75.000  | 200.0000   | 123.3237 |                                                                        |                         |    |    |   |   |
| SGO_0669 | -0.097                 | 7.966                | 0.0429  | 0.2855  | 57.500  | 38.500  | 60.0733    | 58.7921  | typA; GTP-binding protein TypA                                         |                         |    |    |   |   |
|          |                        |                      |         |         | 60.500  | 43.000  | 60.5000    | 70.7056  |                                                                        |                         |    |    |   |   |
| SGO_0671 | -1.199                 | 7.584                | 0.0008  | 0.0012  | 31.000  | 46.500  | 32.3873    | 71.0087  | murD; UDP-N-acetylmuramoylalanine--D-glutamate ligase                  |                         |    |    |   |   |
|          |                        |                      |         |         | 26.000  | 38.000  | 26.0000    | 62.4840  |                                                                        |                         |    |    |   |   |
| SGO_0672 | -1.375                 | 6.114                | 0.0055  | 0.0216  | 5.500   | 14.000  | 5.7461     | 21.3790  | murG; undecaprenyl-PP-MurNAc-pentapeptide-UDPGlcNAc GlcNAc transferase |                         |    |    |   |   |
|          |                        |                      |         |         | 15.000  | 16.500  | 15.0000    | 27.1312  |                                                                        |                         |    |    |   |   |
| SGO_0673 | -1.282                 | 4.462                | 0.0387  | 0.2526  | 3.500   | 4.500   | 3.6566     | 6.8718   | DivIB; cell division protein DivIB                                     |                         |    |    |   |   |
|          |                        |                      |         |         |         | 7.000   |            | 11.5102  |                                                                        |                         |    |    |   |   |
| SGO_0674 | -0.210                 | 8.869                | 0.0037  | 0.0120  | 107.500 | 84.500  | 112.3109   | 129.0373 | ftsA; cell division protein FtsA                                       |                         |    |    |   |   |
|          |                        |                      |         |         | 104.500 | 74.000  | 104.5000   | 121.6794 |                                                                        |                         |    |    |   |   |
| SGO_0675 | -0.149                 | 9.573                | 0.0515  | 0.3515  | 171.500 | 155.500 | 179.1750   | 237.4591 | ftsZ; cell division protein FtsZ                                       |                         |    |    |   |   |
|          |                        |                      |         |         | 179.000 | 101.000 | 179.0000   | 166.0759 |                                                                        |                         |    |    |   |   |
| SGO_0676 | 0.397                  | 5.507                | 0.0465  | 0.3128  | 10.000  | 4.500   | 10.4475    | 6.8718   | conserved hypothetical protein TIGR00044                               |                         |    |    |   |   |
|          |                        |                      |         |         | 15.000  | 8.000   | 15.0000    | 13.1545  |                                                                        |                         |    |    |   |   |

- Show detected proteins only
- Show all proteins

Proteins found: 713

Filter by category:

ABC Transporter

Test

Cutoff

q-Value

.005

p-Value

| Signif | Direction | Applies To   |
|--------|-----------|--------------|
| yes    | +         | ratios, bars |
| no     | n/a       | bars         |
| yes    | -         | ratios, bars |
| yes    | +         | p-, q-Values |
| yes    | -         | p-, q-Values |

Dot Plots Dot Plots

Summary Table

SgFn vs Sg

SgPg vs Sg

SgPgFn vs Sg

SgPg vs SgFn

SgPgFn vs SgFn

SgPgFn vs SgPg

Coverage

| Protein  | SgPg vs SgFn           |                      |         |         | Raw      |         | Normalized |           | Description                                           | Log <sub>2</sub> Ratios |    |    |   |   |   |   |
|----------|------------------------|----------------------|---------|---------|----------|---------|------------|-----------|-------------------------------------------------------|-------------------------|----|----|---|---|---|---|
|          | Log <sub>2</sub> Ratio | Log <sub>2</sub> Sum | q-Value | p-Value | SgPg     | SgFn    | SgPg       | SgFn      |                                                       | -6                      | -4 | -2 | 0 | 2 | 4 | 6 |
| SGO_0677 | 0.062                  | 7.443                | 0.0778  | 0.5626  | 37.500   | 26.500  | 39.1782    | 40.4673   | ylmF protein                                          |                         |    |    |   |   |   |   |
|          |                        |                      |         |         | 50.000   | 27.000  | 50.0000    | 44.3965   |                                                       |                         |    |    |   |   |   |   |
| SGO_0680 | 0.801                  | 8.548                | 0.0049  | 0.0186  | 103.000  | 55.000  | 107.6095   | 83.9888   | cell division protein DivIVA                          |                         |    |    |   |   |   |   |
|          |                        |                      |         |         | 128.500  | 33.000  | 128.5000   | 54.2624   |                                                       |                         |    |    |   |   |   |   |
| SGO_0681 | 1.077                  | 8.323                | 0.0001  | 0.0000  | 106.000  | 33.500  | 110.7438   | 51.1568   | ileS; isoleucyl-tRNA synthetase                       |                         |    |    |   |   |   |   |
|          |                        |                      |         |         | 106.500  | 31.500  | 106.5000   | 51.7960   |                                                       |                         |    |    |   |   |   |   |
| SGO_0684 | -1.632                 | 7.728                | 0.0004  | 0.0004  | 25.000   | 49.000  | 26.1188    | 74.8264   | hypothetical protein SGO_0684                         |                         |    |    |   |   |   |   |
|          |                        |                      |         |         | 25.500   | 52.000  | 25.5000    | 85.5044   |                                                       |                         |    |    |   |   |   |   |
| SGO_0688 | -0.332                 | 7.804                | 0.0336  | 0.2103  | 48.000   | 31.000  | 50.1481    | 47.3391   | ATP dependent Clp protease, ATP-binding subunit, ClpE |                         |    |    |   |   |   |   |
|          |                        |                      |         |         | 47.000   | 48.000  | 47.0000    | 78.9272   |                                                       |                         |    |    |   |   |   |   |
| SGO_0690 | -1.471                 | 4.553                | 0.0349  | 0.2212  |          | 5.000   |            | 7.6353    | fofD; methenyltetrahydrofolate cyclohydrolase         |                         |    |    |   |   |   |   |
|          |                        |                      |         |         | 3.500    | 7.500   | 3.5000     | 12.3324   |                                                       |                         |    |    |   |   |   |   |
| SGO_0693 | -3.021                 | 5.697                | 0.0055  | 0.0215  | 4.500    | 10.000  | 4.7014     | 15.2707   | xseA; exodeoxyribonuclease VII, large subunit         |                         |    |    |   |   |   |   |
|          |                        |                      |         |         | 1.500    | 18.500  | 1.5000     | 30.4198   |                                                       |                         |    |    |   |   |   |   |
| SGO_0695 | 0.389                  | 3.626                |         |         |          | 3.500   |            | 5.3447    | geranyltranstransferase                               |                         |    |    |   |   |   |   |
|          |                        |                      |         |         | 7.000    |         | 7.0000     |           |                                                       |                         |    |    |   |   |   |   |
| SGO_0698 | -0.769                 | 5.857                | 0.0019  | 0.0043  | 9.500    | 11.000  | 9.9251     | 16.7978   | recN; DNA repair protein RecN                         |                         |    |    |   |   |   |   |
|          |                        |                      |         |         | 11.500   | 12.000  | 11.5000    | 19.7318   |                                                       |                         |    |    |   |   |   |   |
| SGO_0699 | -0.938                 | 4.974                | 0.0023  | 0.0060  | 5.500    | 6.000   | 5.7461     | 9.1624    | Serine/threonine protein phosphatase                  |                         |    |    |   |   |   |   |
|          |                        |                      |         |         | 5.000    | 7.000   | 5.0000     | 11.5102   |                                                       |                         |    |    |   |   |   |   |
| SGO_0700 | 0.903                  | 5.663                | 0.0060  | 0.0237  | 14.000   | 7.500   | 14.6265    | 11.4530   | DegV family protein                                   |                         |    |    |   |   |   |   |
|          |                        |                      |         |         | 18.000   | 4.000   | 18.0000    | 6.5773    |                                                       |                         |    |    |   |   |   |   |
| SGO_0701 | 0.251                  | 12.458               | 0.0282  | 0.1725  | 1475.000 | 705.500 | 1541.0098  | 1077.3468 | hup; DNA-binding histone-like protein HU              |                         |    |    |   |   |   |   |
|          |                        |                      |         |         | 1496.500 | 919.000 | 1496.5000  | 1511.1263 |                                                       |                         |    |    |   |   |   |   |

- Show detected proteins only
- Show all proteins

Proteins found: 713

Filter by category:

ABC Transporter

Test

Cutoff

q-Value

.005

p-Value

|             | Signif | Direction | Applies To   |
|-------------|--------|-----------|--------------|
| Red         | yes    | +         | ratios, bars |
| Yellow      | no     | n/a       | bars         |
| Green       | yes    | -         | ratios, bars |
| Pink        | yes    | +         | p-, q-Values |
| Light Green | yes    | -         | p-, q-Values |

Dot Plots Dot Plots

Summary Table

SgFn vs Sg

SgPg vs Sg

SgPgFn vs Sg

SgPg vs SgFn

SgPgFn vs SgFn

SgPgFn vs SgPg

Coverage

SgPg vs SgFn

Raw

Normalized

Log<sub>2</sub> Ratios

| Protein  | SgPg vs SgFn           |                      |         |         | Raw     |         | Normalized |          | Description                                                     | Log <sub>2</sub> Ratios |    |    |   |   |
|----------|------------------------|----------------------|---------|---------|---------|---------|------------|----------|-----------------------------------------------------------------|-------------------------|----|----|---|---|
|          | Log <sub>2</sub> Ratio | Log <sub>2</sub> Sum | q-Value | p-Value | SgPg    | SgFn    | SgPg       | SgFn     |                                                                 | -6                      | -4 | -2 | 0 | 2 |
| SGO_0704 | 0.300                  | 11.092               | 0.0038  | 0.0127  | 559.500 | 341.500 | 584.5390   | 521.4939 | gpmA; 2,3-bisphosphoglycerate-dependent phosphoglycerate mutase |                         |    |    |   |   |
|          |                        |                      |         |         | 619.500 | 278.500 | 619.5000   | 457.9420 |                                                                 |                         |    |    |   |   |
| SGO_0706 | -1.515                 | 5.980                | 0.0001  | 0.0000  | 8.000   | 15.000  | 8.3580     | 22.9060  | phoH-like protein                                               |                         |    |    |   |   |
|          |                        |                      |         |         | 8.000   | 14.500  | 8.0000     | 23.8426  |                                                                 |                         |    |    |   |   |
| SGO_0707 | -5.234                 | 8.398                | 0.0005  | 0.0005  | 6.000   | 118.500 | 6.2685     | 180.9576 | LPXTG cell wall surface protein                                 |                         |    |    |   |   |
|          |                        |                      |         |         | 3.000   | 89.500  | 3.0000     | 147.1663 |                                                                 |                         |    |    |   |   |
| SGO_0708 | -2.339                 | 11.001               | 0.0000  | 0.0000  | 162.000 | 564.500 | 169.2499   | 862.0301 | ald; alanine dehydrogenase                                      |                         |    |    |   |   |
|          |                        |                      |         |         | 169.000 | 516.500 | 169.0000   | 849.2892 |                                                                 |                         |    |    |   |   |
| SGO_0713 | -0.744                 | 7.343                | 0.0012  | 0.0024  | 32.500  | 32.500  | 33.9545    | 49.6297  | sgg; GTP-binding protein Era                                    |                         |    |    |   |   |
|          |                        |                      |         |         | 27.000  | 31.500  | 27.0000    | 51.7960  |                                                                 |                         |    |    |   |   |
| SGO_0719 | -1.516                 | 4.686                | 0.0013  | 0.0029  | 3.500   | 5.500   | 3.6566     | 8.3989   | rnr; ribonuclease R                                             |                         |    |    |   |   |
|          |                        |                      |         |         | 3.000   | 6.500   | 3.0000     | 10.6881  |                                                                 |                         |    |    |   |   |
| SGO_0721 | -0.439                 | 5.111                | 0.0072  | 0.0300  | 6.000   | 6.500   | 6.2685     | 9.9259   | abpB-like dipeptidase lipoprotein                               |                         |    |    |   |   |
|          |                        |                      |         |         | 8.500   | 6.000   | 8.5000     | 9.8659   |                                                                 |                         |    |    |   |   |
| SGO_0722 | 0.853                  | 5.475                | 0.0002  | 0.0001  | 14.000  | 5.000   | 14.6265    | 7.6353   | tehB; tellurite resistance protein TehB                         |                         |    |    |   |   |
|          |                        |                      |         |         | 14.000  | 5.000   | 14.0000    | 8.2216   |                                                                 |                         |    |    |   |   |
| SGO_0724 | -0.780                 | 4.723                | 0.0077  | 0.0334  | 4.000   | 4.500   | 4.1790     | 6.8718   | dipeptidase                                                     |                         |    |    |   |   |
|          |                        |                      |         |         | 5.500   | 6.000   | 5.5000     | 9.8659   |                                                                 |                         |    |    |   |   |
| SGO_0736 | -1.954                 | 5.676                | 0.0005  | 0.0005  | 4.000   | 12.500  | 4.1790     | 19.0884  | hprK; HPr(Ser) kinase/phosphatase                               |                         |    |    |   |   |
|          |                        |                      |         |         | 6.500   | 13.000  | 6.5000     | 21.3761  |                                                                 |                         |    |    |   |   |
| SGO_0739 | 1.551                  | 5.087                | 0.0174  | 0.0968  | 12.500  |         | 13.0594    |          | hypothetical protein SGO_0739                                   |                         |    |    |   |   |
|          |                        |                      |         |         | 16.000  | 3.000   | 16.0000    | 4.9329   |                                                                 |                         |    |    |   |   |
| SGO_0742 | -0.443                 | 6.102                | 0.0000  | 0.0000  | 14.000  | 13.000  | 14.6265    | 19.8519  | peptidase, U32 family                                           |                         |    |    |   |   |
|          |                        |                      |         |         | 14.500  | 12.000  | 14.5000    | 19.7318  |                                                                 |                         |    |    |   |   |

 Show detected proteins only Show all proteinsProteins found:  
713 Filter by category:

ABC Transporter

Test

Cutoff

q-Value

.005

p-Value

|  | Signif | Direction | Applies To   |
|--|--------|-----------|--------------|
|  | yes    | +         | ratios, bars |
|  | no     | n/a       | bars         |
|  | yes    | -         | ratios, bars |
|  | yes    | +         | p-, q-Values |
|  | yes    | -         | p-, q-Values |

Dot Plots Dot Plots

Summary Table

SgFn vs Sg

SgPg vs Sg

SgPgFn vs Sg

SgPg vs SgFn

SgPgFn vs SgFn

SgPgFn vs SgPg

Coverage

SgPg vs SgFn

Raw

Normalized

Log<sub>2</sub> Ratios

| Protein  | SgPg vs SgFn           |                      |         |         | Raw      |          | Normalized |           | Description                                               | Log <sub>2</sub> Ratios |    |    |   |   |
|----------|------------------------|----------------------|---------|---------|----------|----------|------------|-----------|-----------------------------------------------------------|-------------------------|----|----|---|---|
|          | Log <sub>2</sub> Ratio | Log <sub>2</sub> Sum | q-Value | p-Value | SgPg     | SgFn     | SgPg       | SgFn      |                                                           | -6                      | -4 | -2 | 0 | 2 |
| SGO_0743 | 1.012                  | 6.258                | 0.0031  | 0.0096  | 28.000   | 9.000    | 29.2531    | 13.7436   | peptidase, U32 family                                     |                         |    |    |   |   |
|          |                        |                      |         |         | 22.000   | 7.000    | 22.0000    | 11.5102   |                                                           |                         |    |    |   |   |
| SGO_0745 | 1.433                  | 6.982                | 0.0106  | 0.0504  | 48.500   |          | 50.6705    |           | hypothetical protein SGO_0745                             |                         |    |    |   |   |
|          |                        |                      |         |         | 56.000   | 12.000   | 56.0000    | 19.7318   |                                                           |                         |    |    |   |   |
| SGO_0749 | -1.065                 | 7.467                | 0.0068  | 0.0278  | 29.000   | 30.500   | 30.2978    | 46.5756   | glutathione reductase                                     |                         |    |    |   |   |
|          |                        |                      |         |         | 26.000   | 45.000   | 26.0000    | 73.9942   |                                                           |                         |    |    |   |   |
| SGO_0750 | 3.963                  | 8.415                | 0.0001  | 0.0000  | 160.000  | 6.000    | 167.1604   | 9.1624    | efflux transporter, RND family, MFP subunit subfamily     |                         |    |    |   |   |
|          |                        |                      |         |         | 153.500  | 7.000    | 153.5000   | 11.5102   |                                                           |                         |    |    |   |   |
| SGO_0751 | 3.150                  | 7.118                | 0.0009  | 0.0015  | 67.500   | 3.500    | 70.5208    | 5.3447    | ABC transporter, ATP-binding protein SP0786               |                         |    |    |   |   |
|          |                        |                      |         |         | 54.000   | 5.500    | 54.0000    | 9.0437    |                                                           |                         |    |    |   |   |
| SGO_0753 | 0.776                  | 8.336                | 0.0061  | 0.0244  | 101.500  | 50.000   | 106.0424   | 76.3534   | lysS; lysyl-tRNA synthetase                               |                         |    |    |   |   |
|          |                        |                      |         |         | 95.500   | 27.500   | 95.5000    | 45.2187   |                                                           |                         |    |    |   |   |
| SGO_0754 | -1.203                 | 3.045                |         |         |          |          |            |           | phosphoglycerate mutase family protein                    |                         |    |    |   |   |
|          |                        |                      |         |         | 2.500    | 3.500    | 2.5000     | 5.7551    |                                                           |                         |    |    |   |   |
| SGO_0755 | 0.430                  | 5.150                | 0.0253  | 0.1495  | 8.000    | 4.000    | 8.3580     | 6.1083    | regulatory protein                                        |                         |    |    |   |   |
|          |                        |                      |         |         | 12.000   | 5.500    | 12.0000    | 9.0437    |                                                           |                         |    |    |   |   |
| SGO_0760 | 0.092                  | 8.988                | 0.0338  | 0.2120  | 125.500  | 75.000   | 131.1164   | 114.5301  | ppc; phosphoenolpyruvate carboxylase                      |                         |    |    |   |   |
|          |                        |                      |         |         | 130.500  | 80.000   | 130.5000   | 131.5453  |                                                           |                         |    |    |   |   |
| SGO_0761 | -0.524                 | 13.422               | 0.0022  | 0.0058  | 2246.500 | 1976.000 | 2347.0363  | 3017.4872 | tuf; translation elongation factor Tu                     |                         |    |    |   |   |
|          |                        |                      |         |         | 2149.500 | 2103.500 | 2149.5000  | 3458.8186 |                                                           |                         |    |    |   |   |
| SGO_0762 | 0.996                  | 10.630               | 0.0038  | 0.0129  | 581.000  | 150.500  | 607.0012   | 229.8238  | tpiA; triosephosphate isomerase                           |                         |    |    |   |   |
|          |                        |                      |         |         | 449.500  | 181.500  | 449.5000   | 298.4433  |                                                           |                         |    |    |   |   |
| SGO_0763 | -0.153                 | 7.128                | 0.0151  | 0.0803  | 29.500   | 24.500   | 30.8202    | 37.4132   | murA-1; UDP-N-acetylglucosamine 1-carboxyvinyltransferase |                         |    |    |   |   |
|          |                        |                      |         |         | 35.500   | 22.000   | 35.5000    | 36.1750   |                                                           |                         |    |    |   |   |

 Show detected proteins only Show all proteinsProteins found:  
713 Filter by category:

ABC Transporter

Test

Cutoff

q-Value

.005

p-Value

|             | Signif | Direction | Applies To   |
|-------------|--------|-----------|--------------|
| Red         | yes    | +         | ratios, bars |
| Yellow      | no     | n/a       | bars         |
| Green       | yes    | -         | ratios, bars |
| Pink        | yes    | +         | p-, q-Values |
| Light Green | yes    | -         | p-, q-Values |

Dot Plots Dot Plots

Summary Table

SgFn vs Sg

SgPg vs Sg

SgPgFn vs Sg

SgPg vs SgFn

SgPgFn vs SgFn

SgPgFn vs SgPg

Coverage

SgPg vs SgFn

Raw

Normalized

Log<sub>2</sub> Ratios

| Protein  | SgPg vs SgFn           |                      |         |         | Raw     |        | Normalized |         | Description                                  | Log <sub>2</sub> Ratios |    |    |   |   |   |   |
|----------|------------------------|----------------------|---------|---------|---------|--------|------------|---------|----------------------------------------------|-------------------------|----|----|---|---|---|---|
|          | Log <sub>2</sub> Ratio | Log <sub>2</sub> Sum | q-Value | p-Value | SgPg    | SgFn   | SgPg       | SgFn    |                                              | -6                      | -4 | -2 | 0 | 2 | 4 | 6 |
| SGO_0767 | -0.829                 | 5.279                | 0.0144  | 0.0755  | 5.500   | 10.500 | 5.7461     | 16.0342 | transport protein                            |                         |    |    |   |   |   |   |
|          |                        |                      |         |         | 8.000   | 5.500  | 8.0000     | 9.0437  |                                              |                         |    |    |   |   |   |   |
| SGO_0771 | -0.078                 | 8.325                | 0.0501  | 0.3396  | 73.000  | 58.500 | 76.2669    | 89.3335 | pepq; proline dipeptidase                    |                         |    |    |   |   |   |   |
|          |                        |                      |         |         | 79.500  | 46.000 | 79.5000    | 75.6385 |                                              |                         |    |    |   |   |   |   |
| SGO_0773 | -0.087                 | 8.100                | 0.0601  | 0.4177  | 68.500  | 42.500 | 71.5655    | 64.9004 | ccpA; catabolite control protein A           |                         |    |    |   |   |   |   |
|          |                        |                      |         |         | 61.500  | 46.500 | 61.5000    | 76.4607 |                                              |                         |    |    |   |   |   |   |
| SGO_0774 | 0.257                  | 5.516                | 0.0357  | 0.2284  | 14.500  | 6.500  | 15.1489    | 9.9259  | glycosyl transferase, group 1 family protein |                         |    |    |   |   |   |   |
|          |                        |                      |         |         | 10.000  | 6.500  | 10.0000    | 10.6881 |                                              |                         |    |    |   |   |   |   |
| SGO_0775 | -0.186                 | 5.622                | 0.0562  | 0.3873  | 9.500   | 7.000  | 9.9251     | 10.6895 | glycosyl transferase, group 1                |                         |    |    |   |   |   |   |
|          |                        |                      |         |         | 13.000  | 9.500  | 13.0000    | 15.6210 |                                              |                         |    |    |   |   |   |   |
| SGO_0778 | 0.500                  | 8.428                | 0.0005  | 0.0005  | 94.000  | 45.500 | 98.2067    | 69.4816 | thrS; threonyl-tRNA synthetase               |                         |    |    |   |   |   |   |
|          |                        |                      |         |         | 103.500 | 44.500 | 103.5000   | 73.1721 |                                              |                         |    |    |   |   |   |   |
| SGO_0779 | -1.473                 | 7.317                | 0.0007  | 0.0008  | 23.500  | 40.500 | 24.5517    | 61.8463 | response regulator                           |                         |    |    |   |   |   |   |
|          |                        |                      |         |         | 18.000  | 33.500 | 18.0000    | 55.0846 |                                              |                         |    |    |   |   |   |   |
| SGO_0780 | -1.070                 | 4.283                | 0.0082  | 0.0369  | 3.000   | 5.500  | 3.1343     | 8.3989  | histidine kinase                             |                         |    |    |   |   |   |   |
|          |                        |                      |         |         | 3.000   | 3.000  | 3.0000     | 4.9329  |                                              |                         |    |    |   |   |   |   |
| SGO_0784 | -0.115                 | 6.752                | 0.0695  | 0.4919  | 24.000  | 14.500 | 25.0741    | 22.1425 | smc; chromosome segregation protein SMC      |                         |    |    |   |   |   |   |
|          |                        |                      |         |         | 26.000  | 21.000 | 26.0000    | 34.5306 |                                              |                         |    |    |   |   |   |   |
| SGO_0785 | -0.548                 | 3.363                |         |         | 4.000   | 4.000  | 4.1790     | 6.1083  | Cof family protein                           |                         |    |    |   |   |   |   |
|          |                        |                      |         |         |         |        |            |         |                                              |                         |    |    |   |   |   |   |
| SGO_0786 | 1.850                  | 5.077                | 0.0050  | 0.0193  | 14.500  |        | 15.1489    |         | Cof family protein                           |                         |    |    |   |   |   |   |
|          |                        |                      |         |         | 14.500  | 2.500  | 14.5000    | 4.1108  |                                              |                         |    |    |   |   |   |   |
| SGO_0787 | 0.448                  | 6.741                | 0.0087  | 0.0402  | 29.500  | 17.500 | 30.8202    | 26.7237 | ftsY; cell division protein FtsY             |                         |    |    |   |   |   |   |
|          |                        |                      |         |         | 30.500  | 11.500 | 30.5000    | 18.9096 |                                              |                         |    |    |   |   |   |   |

- Show detected proteins only  
 Show all proteins

Proteins found:  
713

Filter by category:

ABC Transporter

Test

Cutoff

q-Value

p-Value

.005

|             | Signif | Direction | Applies To   |
|-------------|--------|-----------|--------------|
| Red         | yes    | +         | ratios, bars |
| Yellow      | no     | n/a       | bars         |
| Green       | yes    | -         | ratios, bars |
| Pink        | yes    | +         | p-, q-Values |
| Light Green | yes    | -         | p-, q-Values |

Dot Plots Dot Plots

Summary Table

SgFn vs Sg

SgPg vs Sg

SgPgFn vs Sg

SgPg vs SgFn

SgPgFn vs SgFn

SgPgFn vs SgPg

Coverage

| Protein  | SgPg vs SgFn           |                      |         |         | Raw     |        | Normalized |         | Description                                                      | Log <sub>2</sub> Ratios |    |    |   |   |
|----------|------------------------|----------------------|---------|---------|---------|--------|------------|---------|------------------------------------------------------------------|-------------------------|----|----|---|---|
|          | Log <sub>2</sub> Ratio | Log <sub>2</sub> Sum | q-Value | p-Value | SgPg    | SgFn   | SgPg       | SgFn    |                                                                  | -6                      | -4 | -2 | 0 | 2 |
| SGO_0788 | -1.017                 | 8.020                | 0.0028  | 0.0083  | 40.000  | 49.000 | 41.7901    | 74.8264 | zwf; glucose-6-phosphate 1-dehydrogenase                         |                         |    |    |   |   |
|          |                        |                      |         |         | 43.500  | 60.500 | 43.5000    | 99.4811 |                                                                  |                         |    |    |   |   |
| SGO_0792 | 1.245                  | 5.922                | 0.0025  | 0.0071  | 23.000  | 7.000  | 24.0293    | 10.6895 | hypothetical protein SGO_0792                                    |                         |    |    |   |   |
|          |                        |                      |         |         | 18.500  | 4.500  | 18.5000    | 7.3994  |                                                                  |                         |    |    |   |   |
| SGO_0794 | -0.353                 | 7.442                | 0.0119  | 0.0588  | 35.000  | 28.000 | 36.5663    | 42.7579 | metallo-beta-lactamase family protein                            |                         |    |    |   |   |
|          |                        |                      |         |         | 39.500  | 33.500 | 39.5000    | 55.0846 |                                                                  |                         |    |    |   |   |
| SGO_0795 | -0.692                 | 5.681                | 0.0081  | 0.0360  | 9.000   | 8.500  | 9.4028     | 12.9801 | tributyryn esterase                                              |                         |    |    |   |   |
|          |                        |                      |         |         | 10.000  | 11.500 | 10.0000    | 18.9096 |                                                                  |                         |    |    |   |   |
| SGO_0798 | -0.196                 | 6.593                | 0.0045  | 0.0162  | 22.500  | 16.500 | 23.5069    | 25.1966 | ABC transporter, ATP-binding protein SP1381                      |                         |    |    |   |   |
|          |                        |                      |         |         | 21.500  | 16.000 | 21.5000    | 26.3091 |                                                                  |                         |    |    |   |   |
| SGO_0800 | 0.619                  | 4.705                | 0.0019  | 0.0047  | 7.000   | 3.500  | 7.3133     | 5.3447  | polysaccharide deacetylase family protein                        |                         |    |    |   |   |
|          |                        |                      |         |         | 8.500   | 3.000  | 8.5000     | 4.9329  |                                                                  |                         |    |    |   |   |
| SGO_0801 | 0.567                  | 8.645                | 0.0005  | 0.0004  | 111.500 | 54.500 | 116.4899   | 83.2252 | hom; homoserine dehydrogenase                                    |                         |    |    |   |   |
|          |                        |                      |         |         | 122.500 | 47.500 | 122.5000   | 78.1050 |                                                                  |                         |    |    |   |   |
| SGO_0802 | 0.008                  | 6.597                | 0.0826  | 0.6016  | 23.000  | 16.000 | 24.0293    | 24.4331 | thrB; homoserine kinase                                          |                         |    |    |   |   |
|          |                        |                      |         |         | 24.500  | 14.500 | 24.5000    | 23.8426 |                                                                  |                         |    |    |   |   |
| SGO_0804 | -0.701                 | 4.607                | 0.0102  | 0.0483  | 5.000   | 4.000  | 5.2238     | 6.1083  | murB; UDP-N-acetylenolpyruvoylglucosamine reductase              |                         |    |    |   |   |
|          |                        |                      |         |         | 4.000   | 5.500  | 4.0000     | 9.0437  |                                                                  |                         |    |    |   |   |
| SGO_0805 | -0.751                 | 4.677                | 0.0092  | 0.0427  | 3.500   | 4.500  | 3.6566     | 6.8718  | potA; spermidine/putrescine ABC transporter, ATP-binding subunit |                         |    |    |   |   |
|          |                        |                      |         |         | 6.000   | 5.500  | 6.0000     | 9.0437  |                                                                  |                         |    |    |   |   |
| SGO_0808 | -0.125                 | 2.871                |         |         |         | 2.500  |            | 3.8177  | potD; spermidine/putrescine ABC transporter                      |                         |    |    |   |   |
|          |                        |                      |         |         | 3.500   |        | 3.5000     |         |                                                                  |                         |    |    |   |   |
| SGO_0812 | -1.840                 | 5.482                | 0.0012  | 0.0023  | 4.500   | 10.000 | 4.7014     | 15.2707 | hypothetical protein SGO_0812                                    |                         |    |    |   |   |
|          |                        |                      |         |         | 5.000   | 12.000 | 5.0000     | 19.7318 |                                                                  |                         |    |    |   |   |

- Show detected proteins only
- Show all proteins

Proteins found: 713

Filter by category:

ABC Transporter

Test

Cutoff

q-Value

.005

p-Value

|             | Signif | Direction | Applies To   |
|-------------|--------|-----------|--------------|
| Red         | yes    | +         | ratios, bars |
| Yellow      | no     | n/a       | bars         |
| Green       | yes    | -         | ratios, bars |
| Pink        | yes    | +         | p-, q-Values |
| Light Green | yes    | -         | p-, q-Values |

Dot Plots Dot Plots



Summary Table

SgFn vs Sg

SgPg vs Sg

SgPgFn vs Sg

SgPg vs SgFn

SgPgFn vs SgFn

SgPgFn vs SgPg

Coverage

| Protein  | SgPg vs SgFn           |                      |         |         | Raw     |         | Normalized |          | Description                              | Log <sub>2</sub> Ratios |    |    |   |   |
|----------|------------------------|----------------------|---------|---------|---------|---------|------------|----------|------------------------------------------|-------------------------|----|----|---|---|
|          | Log <sub>2</sub> Ratio | Log <sub>2</sub> Sum | q-Value | p-Value | SgPg    | SgFn    | SgPg       | SgFn     |                                          | -6                      | -4 | -2 | 0 | 2 |
| SGO_0815 | 0.991                  | 6.530                | 0.0013  | 0.0026  | 31.500  | 9.000   | 32.9097    | 13.7436  | thiI; thiamine biosynthesis protein ThiI |                         |    |    |   |   |
|          |                        |                      |         |         | 28.500  | 10.500  | 28.5000    | 17.2653  |                                          |                         |    |    |   |   |
| SGO_0818 | 3.001                  | 8.832                | 0.0110  | 0.0524  | 190.500 | 17.500  | 199.0253   | 26.7237  | rplU; ribosomal protein L21              |                         |    |    |   |   |
|          |                        |                      |         |         | 230.000 |         | 230.0000   |          |                                          |                         |    |    |   |   |
| SGO_0820 | 0.685                  | 6.704                | 0.0229  | 0.1335  | 35.000  |         | 36.5663    |          | rpmA; ribosomal protein L27              |                         |    |    |   |   |
|          |                        |                      |         |         | 43.000  | 15.000  | 43.0000    | 24.6647  |                                          |                         |    |    |   |   |
| SGO_0823 | -0.907                 | 3.580                | 0.0282  | 0.1720  |         | 3.500   |            | 5.3447   | Cof family protein                       |                         |    |    |   |   |
|          |                        |                      |         |         | 2.500   | 2.500   | 2.5000     | 4.1108   |                                          |                         |    |    |   |   |
| SGO_0824 | 0.663                  | 7.458                | 0.0000  | 0.0000  | 51.500  | 22.500  | 53.8047    | 34.3590  | lepA; GTP-binding protein LepA           |                         |    |    |   |   |
|          |                        |                      |         |         | 54.000  | 20.500  | 54.0000    | 33.7085  |                                          |                         |    |    |   |   |
| SGO_0825 | 0.536                  | 4.160                | 0.0096  | 0.0448  | 6.500   | 3.000   | 6.7909     | 4.5812   | lipoprotein, putative                    |                         |    |    |   |   |
|          |                        |                      |         |         | 6.500   |         | 6.5000     |          |                                          |                         |    |    |   |   |
| SGO_0830 | -0.654                 | 2.427                |         |         | 2.000   |         | 2.0895     |          | uvrC; excinuclease ABC, C subunit        |                         |    |    |   |   |
|          |                        |                      |         |         |         | 2.000   |            | 3.2886   |                                          |                         |    |    |   |   |
| SGO_0832 | 0.985                  | 3.942                | 0.0356  | 0.2272  | 7.000   | 2.000   | 7.3133     | 3.0541   | hypothetical protein SGO_0832            |                         |    |    |   |   |
|          |                        |                      |         |         | 5.000   |         | 5.0000     |          |                                          |                         |    |    |   |   |
| SGO_0833 | -2.479                 | 5.265                | 0.0007  | 0.0009  | 2.000   | 11.500  | 2.0895     | 17.5613  | phosphoesterase-related gene             |                         |    |    |   |   |
|          |                        |                      |         |         | 4.000   | 9.000   | 4.0000     | 14.7988  |                                          |                         |    |    |   |   |
| SGO_0835 | -1.103                 | 8.702                | 0.0000  | 0.0000  | 63.500  | 93.000  | 66.3418    | 142.0174 | nitroreductase                           |                         |    |    |   |   |
|          |                        |                      |         |         | 66.000  | 86.500  | 66.0000    | 142.2333 |                                          |                         |    |    |   |   |
| SGO_0836 | -0.497                 | 9.336                | 0.0013  | 0.0026  | 130.000 | 130.500 | 135.8178   | 199.2824 | pepV; dipeptidase PepV                   |                         |    |    |   |   |
|          |                        |                      |         |         | 132.000 | 109.000 | 132.0000   | 179.2304 |                                          |                         |    |    |   |   |
| SGO_0842 | -2.671                 | 6.038                | 0.0025  | 0.0072  | 3.000   | 22.500  | 3.1343     | 34.3590  | rhodanese family protein                 |                         |    |    |   |   |
|          |                        |                      |         |         | 6.000   | 13.500  | 6.0000     | 22.1983  |                                          |                         |    |    |   |   |

- Show detected proteins only
- Show all proteins

Proteins found: 713

Filter by category:

ABC Transporter

Test

Cutoff

q-Value

.005

p-Value

|  | Signif | Direction | Applies To   |
|--|--------|-----------|--------------|
|  | yes    | +         | ratios, bars |
|  | no     | n/a       | bars         |
|  | yes    | -         | ratios, bars |
|  | yes    | +         | p-, q-Values |
|  | yes    | -         | p-, q-Values |

Dot Plots Dot Plots

Summary Table

SgFn vs Sg

SgPg vs Sg

SgPgFn vs Sg

SgPg vs SgFn

SgPgFn vs SgFn

SgPgFn vs SgPg

Coverage

| Protein  | SgPg vs SgFn           |                      |         |         | Raw     |        | Normalized |         | Description                                       | Log <sub>2</sub> Ratios |    |    |   |   |
|----------|------------------------|----------------------|---------|---------|---------|--------|------------|---------|---------------------------------------------------|-------------------------|----|----|---|---|
|          | Log <sub>2</sub> Ratio | Log <sub>2</sub> Sum | q-Value | p-Value | SgPg    | SgFn   | SgPg       | SgFn    |                                                   | -6                      | -4 | -2 | 0 | 2 |
| SGO_0848 | 1.996                  | 7.739                | 0.0004  | 0.0003  | 82.000  | 18.000 | 85.6697    | 27.4872 | rpmE; ribosomal protein L31                       |                         |    |    |   |   |
|          |                        |                      |         |         | 84.000  | 10.000 | 84.0000    | 16.4432 |                                                   |                         |    |    |   |   |
| SGO_0849 | -0.697                 | 5.926                | 0.0132  | 0.0684  | 13.000  | 15.000 | 13.5818    | 22.9060 | DHH subfamily 1 protein                           |                         |    |    |   |   |
|          |                        |                      |         |         | 9.500   | 9.000  | 9.5000     | 14.7988 |                                                   |                         |    |    |   |   |
| SGO_0850 | 1.176                  | 7.105                | 0.0011  | 0.0020  | 48.500  | 16.000 | 50.6705    | 24.4331 | flavodoxin                                        |                         |    |    |   |   |
|          |                        |                      |         |         | 44.500  | 11.000 | 44.5000    | 18.0875 |                                                   |                         |    |    |   |   |
| SGO_0851 | -0.875                 | 4.486                | 0.0156  | 0.0837  | 5.000   | 7.000  | 5.2238     | 10.6895 | putative permease                                 |                         |    |    |   |   |
|          |                        |                      |         |         | 6.500   |        | 6.5000     |         |                                                   |                         |    |    |   |   |
| SGO_0852 | -1.209                 | 4.527                | 0.0025  | 0.0071  | 4.500   | 5.000  | 4.7014     | 7.6353  | TPR domain protein                                |                         |    |    |   |   |
|          |                        |                      |         |         | 2.500   | 5.000  | 2.5000     | 8.2216  |                                                   |                         |    |    |   |   |
| SGO_0853 | -0.340                 | 4.208                | 0.0129  | 0.0661  | 4.500   | 3.500  | 4.7014     | 5.3447  | budA; alpha-acetolactate decarboxylase            |                         |    |    |   |   |
|          |                        |                      |         |         | 3.500   | 3.000  | 3.5000     | 4.9329  |                                                   |                         |    |    |   |   |
| SGO_0854 | -2.595                 | 6.521                | 0.0044  | 0.0160  | 5.000   | 33.500 | 5.2238     | 51.1568 | cshA; surface-associated protein CshA             |                         |    |    |   |   |
|          |                        |                      |         |         | 7.500   | 17.000 | 7.5000     | 27.9534 |                                                   |                         |    |    |   |   |
| SGO_0855 | 0.282                  | 4.813                | 0.0271  | 0.1633  | 8.000   | 3.500  | 8.3580     | 5.3447  | fbpA; fibronectin-binding protein A               |                         |    |    |   |   |
|          |                        |                      |         |         | 7.000   | 4.500  | 7.0000     | 7.3994  |                                                   |                         |    |    |   |   |
| SGO_0856 | 1.850                  | 6.458                | 0.0011  | 0.0021  | 29.000  | 5.500  | 30.2978    | 8.3989  | ABC transporter, substrate binding protein        |                         |    |    |   |   |
|          |                        |                      |         |         | 38.500  | 6.500  | 38.5000    | 10.6881 |                                                   |                         |    |    |   |   |
| SGO_0859 | -0.621                 | 7.234                | 0.0007  | 0.0010  | 30.000  | 29.000 | 31.3426    | 44.2850 | pheS; phenylalanyl-tRNA synthetase, alpha subunit |                         |    |    |   |   |
|          |                        |                      |         |         | 28.000  | 28.500 | 28.0000    | 46.8630 |                                                   |                         |    |    |   |   |
| SGO_0861 | 0.895                  | 8.418                | 0.0007  | 0.0009  | 103.500 | 35.500 | 108.1319   | 54.2109 | pheT; phenylalanyl-tRNA synthetase, beta subunit  |                         |    |    |   |   |
|          |                        |                      |         |         | 114.000 | 40.000 | 114.0000   | 65.7726 |                                                   |                         |    |    |   |   |
| SGO_0885 | -1.339                 | 5.333                | 0.0042  | 0.0146  | 5.500   | 11.500 | 5.7461     | 17.5613 | cobyrinic acid synthase                           |                         |    |    |   |   |
|          |                        |                      |         |         | 5.500   | 7.000  | 5.5000     | 11.5102 |                                                   |                         |    |    |   |   |

- Show detected proteins only
- Show all proteins

Proteins found: 713

Filter by category:

ABC Transporter

Test

Cutoff

q-Value

.005

p-Value

|             | Signif | Direction | Applies To   |
|-------------|--------|-----------|--------------|
| Red         | yes    | +         | ratios, bars |
| Yellow      | no     | n/a       | bars         |
| Green       | yes    | -         | ratios, bars |
| Pink        | yes    | +         | p-, q-Values |
| Light Green | yes    | -         | p-, q-Values |

Dot Plots Dot Plots

Summary Table

SgFn vs Sg

SgPg vs Sg

SgPgFn vs Sg

SgPg vs SgFn

SgPgFn vs SgFn

SgPgFn vs SgPg

Coverage

SgPg vs SgFn

Raw

Normalized

Log<sub>2</sub> Ratios

| Protein  | SgPg vs SgFn           |                      |         |         | Raw    |        | Normalized |         | Description                                        | Log <sub>2</sub> Ratios |    |    |   |   |   |   |
|----------|------------------------|----------------------|---------|---------|--------|--------|------------|---------|----------------------------------------------------|-------------------------|----|----|---|---|---|---|
|          | Log <sub>2</sub> Ratio | Log <sub>2</sub> Sum | q-Value | p-Value | SgPg   | SgFn   | SgPg       | SgFn    |                                                    | -6                      | -4 | -2 | 0 | 2 | 4 | 6 |
| SGO_0886 | -1.583                 | 4.790                | 0.0009  | 0.0015  | 2.500  | 7.000  | 2.6119     | 10.6895 | Mur ligase family protein                          |                         |    |    |   |   |   |   |
|          |                        |                      |         |         | 4.500  | 6.000  | 4.5000     | 9.8659  |                                                    |                         |    |    |   |   |   |   |
| SGO_0889 | 0.566                  | 6.433                | 0.0003  | 0.0003  | 24.000 | 11.500 | 25.0741    | 17.5613 | glmM; phosphoglucosamine mutase                    |                         |    |    |   |   |   |   |
|          |                        |                      |         |         | 26.500 | 10.500 | 26.5000    | 17.2653 |                                                    |                         |    |    |   |   |   |   |
| SGO_0893 | -0.107                 | 7.603                | 0.0440  | 0.2940  | 40.500 | 33.000 | 42.3125    | 50.3933 | GTP-binding protein                                |                         |    |    |   |   |   |   |
|          |                        |                      |         |         | 51.500 | 30.500 | 51.5000    | 50.1516 |                                                    |                         |    |    |   |   |   |   |
| SGO_0901 | -0.125                 | 6.162                | 0.0425  | 0.2819  | 18.000 | 11.500 | 18.8055    | 17.5613 | DNA-directed DNA polymerase III                    |                         |    |    |   |   |   |   |
|          |                        |                      |         |         | 15.500 | 12.000 | 15.5000    | 19.7318 |                                                    |                         |    |    |   |   |   |   |
| SGO_0906 | -1.270                 | 7.911                | 0.0000  | 0.0000  | 34.000 | 56.500 | 35.5216    | 86.2794 | leuA; 2-isopropylmalate synthase                   |                         |    |    |   |   |   |   |
|          |                        |                      |         |         | 35.000 | 51.000 | 35.0000    | 83.8601 |                                                    |                         |    |    |   |   |   |   |
| SGO_0909 | -0.372                 | 4.027                | 0.0561  | 0.3851  |        | 4.500  |            | 6.8718  | leuC; 3-isopropylmalate dehydratase, large subunit |                         |    |    |   |   |   |   |
|          |                        |                      |         |         | 4.500  | 3.000  | 4.5000     | 4.9329  |                                                    |                         |    |    |   |   |   |   |
| SGO_0911 | 0.254                  | 8.195                | 0.0012  | 0.0024  | 75.000 | 45.000 | 78.3564    | 68.7181 | hypothetical protein SGO_0911                      |                         |    |    |   |   |   |   |
|          |                        |                      |         |         | 81.000 | 39.500 | 81.0000    | 64.9505 |                                                    |                         |    |    |   |   |   |   |
| SGO_0946 | -0.931                 | 6.698                | 0.0008  | 0.0011  | 19.000 | 23.000 | 19.8503    | 35.1226 | Deblocking aminopeptidase                          |                         |    |    |   |   |   |   |
|          |                        |                      |         |         | 16.000 | 20.000 | 16.0000    | 32.8863 |                                                    |                         |    |    |   |   |   |   |
| SGO_0949 | -0.001                 | 4.522                | 0.1088  | 0.8182  | 5.000  | 5.000  | 5.2238     | 7.6353  | deaD; DEAD RNA helicase                            |                         |    |    |   |   |   |   |
|          |                        |                      |         |         | 6.000  | 2.500  | 6.0000     | 4.1108  |                                                    |                         |    |    |   |   |   |   |
| SGO_0950 | -1.575                 | 5.402                | 0.0029  | 0.0089  | 6.500  | 12.000 | 6.7909     | 18.3248 | oxidoreductase                                     |                         |    |    |   |   |   |   |
|          |                        |                      |         |         | 4.000  | 8.000  | 4.0000     | 13.1545 |                                                    |                         |    |    |   |   |   |   |
| SGO_0951 | -0.202                 | 5.426                | 0.0329  | 0.2049  | 9.000  | 6.500  | 9.4028     | 9.9259  | udk; uridine kinase                                |                         |    |    |   |   |   |   |
|          |                        |                      |         |         | 10.500 | 8.000  | 10.5000    | 13.1545 |                                                    |                         |    |    |   |   |   |   |
| SGO_0954 | -0.415                 | 6.016                | 0.0367  | 0.2361  | 9.500  | 13.000 | 9.9251     | 19.8519 | ATP-binding protein                                |                         |    |    |   |   |   |   |
|          |                        |                      |         |         | 18.500 | 10.000 | 18.5000    | 16.4432 |                                                    |                         |    |    |   |   |   |   |

- Show detected proteins only  
 Show all proteins

Proteins found:  
713

Filter by category:

ABC Transporter

Test

Cutoff

q-Value

.005

p-Value

|             | Signif | Direction | Applies To   |
|-------------|--------|-----------|--------------|
| Red         | yes    | +         | ratios, bars |
| Yellow      | no     | n/a       | bars         |
| Green       | yes    | -         | ratios, bars |
| Pink        | yes    | +         | p-, q-Values |
| Light Green | yes    | -         | p-, q-Values |

Dot Plots Dot Plots

Summary Table

SgFn vs Sg

SgPg vs Sg

SgPgFn vs Sg

SgPg vs SgFn

SgPgFn vs SgFn

SgPgFn vs SgPg

Coverage

| Protein  | SgPg vs SgFn           |                      |         |         | Raw    |        | Normalized |         | Description                                            | Log <sub>2</sub> Ratios |    |    |   |   |   |   |
|----------|------------------------|----------------------|---------|---------|--------|--------|------------|---------|--------------------------------------------------------|-------------------------|----|----|---|---|---|---|
|          | Log <sub>2</sub> Ratio | Log <sub>2</sub> Sum | q-Value | p-Value | SgPg   | SgFn   | SgPg       | SgFn    |                                                        | -6                      | -4 | -2 | 0 | 2 | 4 | 6 |
| SGO_0955 | 0.451                  | 4.001                | 0.0127  | 0.0640  |        | 3.000  |            | 4.5812  | transporter                                            |                         |    |    |   |   |   |   |
|          |                        |                      |         |         | 6.500  | 3.000  | 6.5000     | 4.9329  |                                                        |                         |    |    |   |   |   |   |
| SGO_0959 | -1.525                 | 5.534                | 0.0049  | 0.0184  | 6.500  | 14.000 | 6.7909     | 21.3790 | copper homeostasis protein CutC                        |                         |    |    |   |   |   |   |
|          |                        |                      |         |         | 5.000  | 8.000  | 5.0000     | 13.1545 |                                                        |                         |    |    |   |   |   |   |
| SGO_0981 | 0.346                  | 2.486                |         |         | 3.000  |        | 3.1343     |         | comE operon protein 2 family                           |                         |    |    |   |   |   |   |
|          |                        |                      |         |         |        | 1.500  |            | 2.4665  |                                                        |                         |    |    |   |   |   |   |
| SGO_0982 | 0.524                  | 6.278                | 0.0049  | 0.0186  | 19.500 | 10.000 | 20.3727    | 15.2707 | amino acid ABC transporter, amino acid-binding protein |                         |    |    |   |   |   |   |
|          |                        |                      |         |         | 25.500 | 10.000 | 25.5000    | 16.4432 |                                                        |                         |    |    |   |   |   |   |
| SGO_0987 | -0.070                 | 7.365                | 0.0982  | 0.7269  | 32.500 | 28.000 | 33.9545    | 42.7579 | metK; S-adenosylmethionine synthetase                  |                         |    |    |   |   |   |   |
|          |                        |                      |         |         | 47.000 | 25.000 | 47.0000    | 41.1079 |                                                        |                         |    |    |   |   |   |   |
| SGO_0993 | -0.644                 | 3.652                | 0.0469  | 0.3163  |        | 2.500  |            | 3.8177  | GTP-binding protein HflX                               |                         |    |    |   |   |   |   |
|          |                        |                      |         |         | 3.000  | 3.500  | 3.0000     | 5.7551  |                                                        |                         |    |    |   |   |   |   |
| SGO_0995 | -1.248                 | 5.629                | 0.0117  | 0.0566  | 11.500 | 9.000  | 12.0147    | 13.7436 | metallo-beta-lactamase superfamily protein             |                         |    |    |   |   |   |   |
|          |                        |                      |         |         | 4.000  | 12.000 | 4.0000     | 19.7318 |                                                        |                         |    |    |   |   |   |   |
| SGO_0997 | -0.881                 | 4.852                | 0.0342  | 0.2148  | 8.500  | 5.000  | 8.8804     | 7.6353  | hypothetical protein SGO_0997                          |                         |    |    |   |   |   |   |
|          |                        |                      |         |         | 2.500  | 6.000  | 2.5000     | 9.8659  |                                                        |                         |    |    |   |   |   |   |
| SGO_1000 | -1.010                 | 5.423                | 0.0013  | 0.0025  | 8.000  | 9.000  | 8.3580     | 13.7436 | recJ; single-stranded-DNA-specific exonuclease RecJ    |                         |    |    |   |   |   |   |
|          |                        |                      |         |         | 6.000  | 9.000  | 6.0000     | 14.7988 |                                                        |                         |    |    |   |   |   |   |
| SGO_1001 | -0.178                 | 7.924                | 0.0588  | 0.4071  | 48.500 | 33.000 | 50.6705    | 50.3933 | apt; adenine phosphoribosyltransferase                 |                         |    |    |   |   |   |   |
|          |                        |                      |         |         | 62.000 | 48.500 | 62.0000    | 79.7493 |                                                        |                         |    |    |   |   |   |   |
| SGO_1003 | 0.993                  | 4.573                | 0.0021  | 0.0054  | 8.500  | 2.500  | 8.8804     | 3.8177  | DNA replication protein DnaD                           |                         |    |    |   |   |   |   |
|          |                        |                      |         |         | 7.000  | 2.500  | 7.0000     | 4.1108  |                                                        |                         |    |    |   |   |   |   |
| SGO_1004 | 0.613                  | 4.345                | 0.0244  | 0.1438  | 7.500  | 2.000  | 7.8356     | 3.0541  | glutathione S-transferase family protein               |                         |    |    |   |   |   |   |
|          |                        |                      |         |         | 4.500  | 3.000  | 4.5000     | 4.9329  |                                                        |                         |    |    |   |   |   |   |

- Show detected proteins only
- Show all proteins

Proteins found: 713

Filter by category:

ABC Transporter

Test

Cutoff

q-Value

.005

p-Value

|             | Signif | Direction | Applies To   |
|-------------|--------|-----------|--------------|
| Red         | yes    | +         | ratios, bars |
| Yellow      | no     | n/a       | bars         |
| Green       | yes    | -         | ratios, bars |
| Pink        | yes    | +         | p-, q-Values |
| Light Green | yes    | -         | p-, q-Values |

Dot Plots Dot Plots

Summary Table

SgFn vs Sg

SgPg vs Sg

SgPgFn vs Sg

SgPg vs SgFn

SgPgFn vs SgFn

SgPgFn vs SgPg

Coverage

SgPg vs SgFn

Raw

Normalized

Log<sub>2</sub> Ratios

| Protein  | SgPg vs SgFn           |                      |         |         | Raw     |         | Normalized |          | Description                                          | Log <sub>2</sub> Ratios |    |    |   |   |   |   |
|----------|------------------------|----------------------|---------|---------|---------|---------|------------|----------|------------------------------------------------------|-------------------------|----|----|---|---|---|---|
|          | Log <sub>2</sub> Ratio | Log <sub>2</sub> Sum | q-Value | p-Value | SgPg    | SgFn    | SgPg       | SgFn     |                                                      | -6                      | -4 | -2 | 0 | 2 | 4 | 6 |
| SGO_1005 | 0.464                  | 4.993                | 0.0129  | 0.0658  | 10.000  | 5.000   | 10.4475    | 7.6353   | Bcl-2 family protein                                 |                         |    |    |   |   |   |   |
|          |                        |                      |         |         | 8.000   | 3.500   | 8.0000     | 5.7551   |                                                      |                         |    |    |   |   |   |   |
| SGO_1006 | -0.015                 | 3.203                | 0.1268  | 0.9734  | 3.500   | 2.000   | 3.6566     | 3.0541   | conserved hypothetical protein TIGR00486             |                         |    |    |   |   |   |   |
|          |                        |                      |         |         | 2.500   |         | 2.5000     |          |                                                      |                         |    |    |   |   |   |   |
| SGO_1009 | -0.573                 | 9.300                | 0.0019  | 0.0047  | 126.500 | 115.000 | 132.1612   | 175.6129 | rfbA-1; glucose-1-phosphate thymidyltransferase      |                         |    |    |   |   |   |   |
|          |                        |                      |         |         | 121.000 | 122.500 | 121.0000   | 201.4287 |                                                      |                         |    |    |   |   |   |   |
| SGO_1010 | 0.105                  | 7.238                | 0.0678  | 0.4775  | 42.500  | 26.000  | 44.4020    | 39.7038  | rmIC; dTDP-4-keto-6-deoxyglucose-3,5-epimerase       |                         |    |    |   |   |   |   |
|          |                        |                      |         |         | 34.000  | 20.000  | 34.0000    | 32.8863  |                                                      |                         |    |    |   |   |   |   |
| SGO_1011 | -1.226                 | 8.918                | 0.0039  | 0.0133  | 73.000  | 90.500  | 76.2669    | 138.1997 | rfbB-1; dTDP-glucose 4,6-dehydratase                 |                         |    |    |   |   |   |   |
|          |                        |                      |         |         | 67.000  | 123.000 | 67.0000    | 202.2509 |                                                      |                         |    |    |   |   |   |   |
| SGO_1012 | -0.640                 | 9.034                | 0.0002  | 0.0001  | 98.500  | 102.500 | 102.9081   | 156.5245 | galE-1; UDP-glucose 4-epimerase                      |                         |    |    |   |   |   |   |
|          |                        |                      |         |         | 102.000 | 99.000  | 102.0000   | 162.7873 |                                                      |                         |    |    |   |   |   |   |
| SGO_1013 | -0.717                 | 2.988                |         |         |         |         |            |          | Glycosyltransferase involved in cell wall biogenesis |                         |    |    |   |   |   |   |
|          |                        |                      |         |         | 3.000   | 3.000   | 3.0000     | 4.9329   |                                                      |                         |    |    |   |   |   |   |
| SGO_1016 | 0.679                  | 4.010                | 0.0282  | 0.1722  | 6.500   | 2.500   | 6.7909     | 3.8177   | putative glycosyltransferase                         |                         |    |    |   |   |   |   |
|          |                        |                      |         |         | 5.500   |         | 5.5000     |          |                                                      |                         |    |    |   |   |   |   |
| SGO_1019 | 0.022                  | 3.918                | 0.1180  | 0.8916  | 4.000   |         | 4.1790     |          | glycosyl transferase                                 |                         |    |    |   |   |   |   |
|          |                        |                      |         |         | 6.000   | 3.000   | 6.0000     | 4.9329   |                                                      |                         |    |    |   |   |   |   |
| SGO_1020 | -0.479                 | 7.674                | 0.0085  | 0.0391  | 34.000  | 37.000  | 35.5216    | 56.5015  | rfbD; dTDP-4-dehydrorhamnose reductase               |                         |    |    |   |   |   |   |
|          |                        |                      |         |         | 50.500  | 37.500  | 50.5000    | 61.6618  |                                                      |                         |    |    |   |   |   |   |
| SGO_1024 | 1.861                  | 5.327                | 0.0044  | 0.0154  | 18.500  | 2.000   | 19.3279    | 3.0541   | putative polysaccharide ABC transporter              |                         |    |    |   |   |   |   |
|          |                        |                      |         |         | 12.000  | 3.500   | 12.0000    | 5.7551   |                                                      |                         |    |    |   |   |   |   |
| SGO_1025 | 1.052                  | 5.779                | 0.0087  | 0.0402  | 15.000  | 8.500   | 15.6713    | 12.9801  | rgp; glycosyltransferase                             |                         |    |    |   |   |   |   |
|          |                        |                      |         |         | 20.500  | 3.500   | 20.5000    | 5.7551   |                                                      |                         |    |    |   |   |   |   |

 Show detected proteins only Show all proteinsProteins found:  
713 Filter by category:

ABC Transporter

Test

Cutoff

q-Value

.005

p-Value

|             | Signif | Direction | Applies To   |
|-------------|--------|-----------|--------------|
| Red         | yes    | +         | ratios, bars |
| Yellow      | no     | n/a       | bars         |
| Green       | yes    | -         | ratios, bars |
| Pink        | yes    | +         | p-, q-Values |
| Light Green | yes    | -         | p-, q-Values |

Dot Plots Dot Plots

Summary Table

SgFn vs Sg

SgPg vs Sg

SgPgFn vs Sg

SgPg vs SgFn

SgPgFn vs SgFn

SgPgFn vs SgPg

Coverage

SgPg vs SgFn

Raw

Normalized

Log<sub>2</sub> Ratios

| Protein  | SgPg vs SgFn           |                      |         |         | Raw     |        | Normalized |          | Description                                                                                                       | Log <sub>2</sub> Ratios |    |    |   |   |   |   |
|----------|------------------------|----------------------|---------|---------|---------|--------|------------|----------|-------------------------------------------------------------------------------------------------------------------|-------------------------|----|----|---|---|---|---|
|          | Log <sub>2</sub> Ratio | Log <sub>2</sub> Sum | q-Value | p-Value | SgPg    | SgFn   | SgPg       | SgFn     |                                                                                                                   | -6                      | -4 | -2 | 0 | 2 | 4 | 6 |
| SGO_1026 | -0.231                 | 6.138                | 0.0308  | 0.1900  | 15.000  | 10.500 | 15.6713    | 16.0342  | rhamnosyltransferase                                                                                              |                         |    |    |   |   |   |   |
|          |                        |                      |         |         | 16.500  | 13.500 | 16.5000    | 22.1983  |                                                                                                                   |                         |    |    |   |   |   |   |
| SGO_1031 | 0.443                  | 4.994                | 0.0067  | 0.0276  | 8.000   | 4.000  | 8.3580     | 6.1083   | cmk; cytidylate kinase                                                                                            |                         |    |    |   |   |   |   |
|          |                        |                      |         |         | 10.000  | 4.500  | 10.0000    | 7.3994   |                                                                                                                   |                         |    |    |   |   |   |   |
| SGO_1034 | 1.012                  | 9.453                | 0.0001  | 0.0000  | 222.000 | 79.000 | 231.9350   | 120.6384 | rplT; ribosomal protein L20                                                                                       |                         |    |    |   |   |   |   |
|          |                        |                      |         |         | 236.500 | 68.000 | 236.5000   | 111.8135 |                                                                                                                   |                         |    |    |   |   |   |   |
| SGO_1035 | -0.564                 | 5.768                | 0.0013  | 0.0027  | 10.500  | 10.000 | 10.9699    | 15.2707  | gloA; lactoylglutathione lyase                                                                                    |                         |    |    |   |   |   |   |
|          |                        |                      |         |         | 11.000  | 10.500 | 11.0000    | 17.2653  |                                                                                                                   |                         |    |    |   |   |   |   |
| SGO_1036 | -0.942                 | 6.292                | 0.0161  | 0.0871  | 8.500   | 21.000 | 8.8804     | 32.0684  | amino acid ABC transporter, ATP-binding protein SP1242                                                            |                         |    |    |   |   |   |   |
|          |                        |                      |         |         | 18.500  | 11.500 | 18.5000    | 18.9096  |                                                                                                                   |                         |    |    |   |   |   |   |
| SGO_1037 | 1.204                  | 4.743                | 0.0083  | 0.0375  | 9.000   | 1.500  | 9.4028     | 2.2906   | glutamine ABC transporter permease and substrate binding protein                                                  |                         |    |    |   |   |   |   |
|          |                        |                      |         |         | 8.500   | 4.000  | 8.5000     | 6.5773   |                                                                                                                   |                         |    |    |   |   |   |   |
| SGO_1038 | -0.205                 | 5.088                | 0.0722  | 0.5173  | 9.500   | 7.000  | 9.9251     | 10.6895  | uvrB; excinuclease ABC, B subunit                                                                                 |                         |    |    |   |   |   |   |
|          |                        |                      |         |         | 6.000   | 4.500  | 6.0000     | 7.3994   |                                                                                                                   |                         |    |    |   |   |   |   |
| SGO_1041 | -0.646                 | 4.507                | 0.0268  | 0.1605  | 7.000   | 6.500  | 7.3133     | 9.9259   | hypothetical protein SGO_1041                                                                                     |                         |    |    |   |   |   |   |
|          |                        |                      |         |         | 5.500   |        | 5.5000     |          |                                                                                                                   |                         |    |    |   |   |   |   |
| SGO_1044 | -0.186                 | 3.767                | 0.0278  | 0.1681  | 4.000   |        | 4.1790     |          | MutT/nudix family protein                                                                                         |                         |    |    |   |   |   |   |
|          |                        |                      |         |         | 4.500   | 3.000  | 4.5000     | 4.9329   |                                                                                                                   |                         |    |    |   |   |   |   |
| SGO_1047 | 2.902                  | 5.310                | 0.0170  | 0.0942  | 15.500  |        | 16.1937    |          | hypothetical protein SGO_1047                                                                                     |                         |    |    |   |   |   |   |
|          |                        |                      |         |         | 21.000  | 1.500  | 21.0000    | 2.4665   |                                                                                                                   |                         |    |    |   |   |   |   |
| SGO_1050 | 0.036                  | 3.963                | 0.1129  | 0.8522  | 3.500   |        | 3.6566     |          | ribF; riboflavin biosynthesis protein RibF                                                                        |                         |    |    |   |   |   |   |
|          |                        |                      |         |         | 7.000   | 3.000  | 7.0000     | 4.9329   |                                                                                                                   |                         |    |    |   |   |   |   |
| SGO_1059 | 2.143                  | 5.896                | 0.0001  | 0.0001  | 22.500  | 4.000  | 23.5069    | 6.1083   | pstB; Phosphate import ATP-binding protein pstB 1 (Phosphate-transporting ATPase 1) (ABC phosphate transporter 1) |                         |    |    |   |   |   |   |
|          |                        |                      |         |         | 25.000  | 3.000  | 25.0000    | 4.9329   |                                                                                                                   |                         |    |    |   |   |   |   |

- Show detected proteins only  
 Show all proteins

Proteins found:  
713

Filter by category:

ABC Transporter

Test

Cutoff

q-Value

.005

p-Value

|             | Signif | Direction | Applies To   |
|-------------|--------|-----------|--------------|
| Red         | yes    | +         | ratios, bars |
| Yellow      | no     | n/a       | bars         |
| Green       | yes    | -         | ratios, bars |
| Pink        | yes    | +         | p-, q-Values |
| Light Green | yes    | -         | p-, q-Values |

Dot Plots Dot Plots

Summary Table

SgFn vs Sg

SgPg vs Sg

SgPgFn vs Sg

SgPg vs SgFn

SgPgFn vs SgFn

SgPgFn vs SgPg

Coverage

| Protein  | SgPg vs SgFn           |                      |         |         | Raw      |         | Normalized |          | Description                                   | Log <sub>2</sub> Ratios |    |    |   |   |
|----------|------------------------|----------------------|---------|---------|----------|---------|------------|----------|-----------------------------------------------|-------------------------|----|----|---|---|
|          | Log <sub>2</sub> Ratio | Log <sub>2</sub> Sum | q-Value | p-Value | SgPg     | SgFn    | SgPg       | SgFn     |                                               | -6                      | -4 | -2 | 0 | 2 |
| SGO_1060 | 1.407                  | 6.618                | 0.0009  | 0.0014  | 36.500   | 7.500   | 38.1335    | 11.4530  | phosphate transport system regulatory protein |                         |    |    |   |   |
|          |                        |                      |         |         | 33.000   | 9.500   | 33.0000    | 15.6210  |                                               |                         |    |    |   |   |
| SGO_1065 | -0.175                 | 5.520                | 0.0316  | 0.1956  | 10.500   | 9.000   | 10.9699    | 13.7436  | hypothetical protein SGO_1065                 |                         |    |    |   |   |
|          |                        |                      |         |         | 10.500   | 6.500   | 10.5000    | 10.6881  |                                               |                         |    |    |   |   |
| SGO_1066 | -1.266                 | 5.599                | 0.0009  | 0.0016  | 8.000    | 10.500  | 8.3580     | 16.0342  | hypothetical protein SGO_1066                 |                         |    |    |   |   |
|          |                        |                      |         |         | 6.000    | 11.000  | 6.0000     | 18.0875  |                                               |                         |    |    |   |   |
| SGO_1069 | 0.250                  | 8.375                | 0.0127  | 0.0644  | 95.000   | 49.000  | 99.2515    | 74.8264  | membrane alanyl aminopeptidase                |                         |    |    |   |   |
|          |                        |                      |         |         | 81.500   | 46.500  | 81.5000    | 76.4607  |                                               |                         |    |    |   |   |
| SGO_1072 | -2.645                 | 5.819                | 0.0021  | 0.0051  | 4.000    | 17.000  | 4.1790     | 25.9602  | ciaR; Transcriptional regulatory protein CiaR |                         |    |    |   |   |
|          |                        |                      |         |         |          | 16.000  |            | 26.3091  |                                               |                         |    |    |   |   |
| SGO_1073 | -1.332                 | 3.200                |         |         | 2.500    |         | 2.6119     |          | Sensor protein CiaH                           |                         |    |    |   |   |
|          |                        |                      |         |         |          | 4.000   |            | 6.5773   |                                               |                         |    |    |   |   |
| SGO_1075 | -2.053                 | 4.817                | 0.0216  | 0.1250  |          | 9.500   |            | 14.5072  | alpha-amylase precursor                       |                         |    |    |   |   |
|          |                        |                      |         |         | 3.000    | 6.500   | 3.0000     | 10.6881  |                                               |                         |    |    |   |   |
| SGO_1077 | 0.031                  | 4.917                | 0.0724  | 0.5199  | 6.500    | 1.500   | 6.7909     | 2.2906   | coaA; pantothenate kinase                     |                         |    |    |   |   |
|          |                        |                      |         |         | 5.500    | 9.500   | 5.5000     | 15.6210  |                                               |                         |    |    |   |   |
| SGO_1078 | -1.252                 | 5.397                | 0.0030  | 0.0090  | 4.500    | 8.500   | 4.7014     | 12.9801  | methyltransferase domain protein              |                         |    |    |   |   |
|          |                        |                      |         |         | 8.000    | 10.000  | 8.0000     | 16.4432  |                                               |                         |    |    |   |   |
| SGO_1079 | -0.876                 | 7.174                | 0.0185  | 0.1042  | 20.500   | 20.000  | 21.4174    | 30.5414  | pdp; pyrimidine-nucleoside phosphorylase      |                         |    |    |   |   |
|          |                        |                      |         |         | 27.500   | 39.500  | 27.5000    | 64.9505  |                                               |                         |    |    |   |   |
| SGO_1080 | 0.245                  | 7.887                | 0.0045  | 0.0165  | 64.000   | 37.000  | 66.8642    | 56.5015  | deoC; deoxyribose-phosphate aldolase          |                         |    |    |   |   |
|          |                        |                      |         |         | 61.500   | 31.500  | 61.5000    | 51.7960  |                                               |                         |    |    |   |   |
| SGO_1082 | 0.898                  | 11.735               | 0.0011  | 0.0019  | 1026.000 | 443.000 | 1071.9160  | 676.4913 | lipoprotein                                   |                         |    |    |   |   |
|          |                        |                      |         |         | 1141.000 | 316.500 | 1141.0000  | 520.4260 |                                               |                         |    |    |   |   |

- Show detected proteins only
- Show all proteins

Proteins found: 713

Filter by category:

ABC Transporter

Test

Cutoff

q-Value

.005

p-Value

|             | Signif | Direction | Applies To   |
|-------------|--------|-----------|--------------|
| Red         | yes    | +         | ratios, bars |
| Yellow      | no     | n/a       | bars         |
| Green       | yes    | -         | ratios, bars |
| Pink        | yes    | +         | p-, q-Values |
| Light Green | yes    | -         | p-, q-Values |

Dot Plots Dot Plots

Summary Table SgFn vs Sg SgPg vs Sg SgPgFn vs Sg SgPg vs SgFn SgPgFn vs SgFn SgPgFn vs SgPg Coverage

| Protein  | SgPg vs SgFn           |                      |         |         | Raw     |          | Normalized |           | Description                                          | Log <sub>2</sub> Ratios |    |    |   |   |
|----------|------------------------|----------------------|---------|---------|---------|----------|------------|-----------|------------------------------------------------------|-------------------------|----|----|---|---|
|          | Log <sub>2</sub> Ratio | Log <sub>2</sub> Sum | q-Value | p-Value | SgPg    | SgFn     | SgPg       | SgFn      |                                                      | -6                      | -4 | -2 | 0 | 2 |
| SGO_1083 | 1.096                  | 8.662                | 0.0021  | 0.0055  | 149.500 | 41.500   | 156.1905   | 63.3733   | sugar ABC transporter, ATP-binding protein SP0846    |                         |    |    |   |   |
|          |                        |                      |         |         | 120.500 | 39.500   | 120.5000   | 64.9505   |                                                      |                         |    |    |   |   |
| SGO_1090 | 0.249                  | 4.491                | 0.0722  | 0.5174  | 9.000   |          | 9.4028     |           | pseudouridine synthase, RluA family                  |                         |    |    |   |   |
|          |                        |                      |         |         | 6.500   | 4.000    | 6.5000     | 6.5773    |                                                      |                         |    |    |   |   |
| SGO_1096 | -3.502                 | 12.948               | 0.0001  | 0.0001  | 295.000 | 2269.000 | 308.2020   | 3464.9183 | butA; acetoin dehydrogenase                          |                         |    |    |   |   |
|          |                        |                      |         |         | 332.500 | 2308.500 | 332.5000   | 3795.9033 |                                                      |                         |    |    |   |   |
| SGO_1098 | -1.135                 | 6.369                | 0.0019  | 0.0043  | 9.500   | 18.500   | 9.9251     | 28.2508   | proA; gamma-glutamyl phosphate reductase             |                         |    |    |   |   |
|          |                        |                      |         |         | 16.500  | 17.000   | 16.5000    | 27.9534   |                                                      |                         |    |    |   |   |
| SGO_1107 | 1.157                  | 2.994                |         |         |         |          |            |           | PyrR bifunctional protein                            |                         |    |    |   |   |
|          |                        |                      |         |         | 5.500   | 1.500    | 5.5000     | 2.4665    |                                                      |                         |    |    |   |   |
| SGO_1109 | 1.503                  | 7.095                | 0.0001  | 0.0000  | 47.000  | 11.500   | 49.1034    | 17.5613   | pyrB; aspartate carbamoyltransferase                 |                         |    |    |   |   |
|          |                        |                      |         |         | 52.000  | 11.000   | 52.0000    | 18.0875   |                                                      |                         |    |    |   |   |
| SGO_1111 | 0.633                  | 4.603                | 0.0021  | 0.0054  | 6.500   | 3.000    | 6.7909     | 4.5812    | fruR; phosphotransferase system repressor            |                         |    |    |   |   |
|          |                        |                      |         |         | 8.000   | 3.000    | 8.0000     | 4.9329    |                                                      |                         |    |    |   |   |
| SGO_1112 | 0.638                  | 5.431                | 0.0121  | 0.0598  | 10.000  | 5.000    | 10.4475    | 7.6353    | fruB; 1-phosphofructokinase                          |                         |    |    |   |   |
|          |                        |                      |         |         | 16.000  | 5.500    | 16.0000    | 9.0437    |                                                      |                         |    |    |   |   |
| SGO_1113 | 0.709                  | 7.396                | 0.0246  | 0.1456  | 58.000  | 30.000   | 60.5956    | 45.8121   | fruA; PTS system, fructose specific IIABC components |                         |    |    |   |   |
|          |                        |                      |         |         | 41.500  | 12.500   | 41.5000    | 20.5539   |                                                      |                         |    |    |   |   |
| SGO_1114 | 1.400                  | 5.373                | 0.0022  | 0.0060  | 15.500  | 5.000    | 16.1937    | 7.6353    | Protein of unknown function (DUF1149) superfamily    |                         |    |    |   |   |
|          |                        |                      |         |         | 13.500  | 2.500    | 13.5000    | 4.1108    |                                                      |                         |    |    |   |   |
| SGO_1115 | -1.645                 | 4.960                | 0.0095  | 0.0441  | 5.000   |          | 5.2238     |           | DegV family protein                                  |                         |    |    |   |   |
|          |                        |                      |         |         | 7.000   | 11.500   | 7.0000     | 18.9096   |                                                      |                         |    |    |   |   |
| SGO_1116 | 0.440                  | 7.068                | 0.0022  | 0.0059  | 39.000  | 19.500   | 40.7453    | 29.7778   | dapB; dihydrodipicolinate reductase                  |                         |    |    |   |   |
|          |                        |                      |         |         | 36.500  | 16.500   | 36.5000    | 27.1312   |                                                      |                         |    |    |   |   |

- Show detected proteins only
- Show all proteins

Proteins found: 713

Filter by category:  
ABC Transporter

Test Cutoff

q-Value

.005

p-Value

| Signif | Direction | Applies To   |
|--------|-----------|--------------|
| yes    | +         | ratios, bars |
| no     | n/a       | bars         |
| yes    | -         | ratios, bars |
| yes    | +         | p-, q-Values |
| yes    | -         | p-, q-Values |

Dot Plots Dot Plots



Summary Table

SgFn vs Sg

SgPg vs Sg

SgPgFn vs Sg

SgPg vs SgFn

SgPgFn vs SgFn

SgPgFn vs SgPg

Coverage

| Protein  | SgPg vs SgFn           |                      |         |         | Raw    |        | Normalized |          | Description                                                | Log <sub>2</sub> Ratios |    |    |   |   |
|----------|------------------------|----------------------|---------|---------|--------|--------|------------|----------|------------------------------------------------------------|-------------------------|----|----|---|---|
|          | Log <sub>2</sub> Ratio | Log <sub>2</sub> Sum | q-Value | p-Value | SgPg   | SgFn   | SgPg       | SgFn     |                                                            | -6                      | -4 | -2 | 0 | 2 |
| SGO_1117 | -0.898                 | 4.274                | 0.0269  | 0.1619  | 3.000  | 6.500  | 3.1343     | 9.9259   | pcnA; polynucleotide adenylyltransferase                   |                         |    |    |   |   |
|          |                        |                      |         |         | 3.000  | 2.000  | 3.0000     | 3.2886   |                                                            |                         |    |    |   |   |
| SGO_1118 | -1.459                 | 4.639                | 0.0008  | 0.0011  | 3.500  | 5.500  | 3.6566     | 8.3989   | ABC transporter, ATP-binding protein SP1553                |                         |    |    |   |   |
|          |                        |                      |         |         | 3.000  | 6.000  | 3.0000     | 9.8659   |                                                            |                         |    |    |   |   |
| SGO_1120 | -0.509                 | 8.618                | 0.0052  | 0.0203  | 78.000 | 67.000 | 81.4907    | 102.3136 | guaA; GMP synthase                                         |                         |    |    |   |   |
|          |                        |                      |         |         | 80.000 | 78.500 | 80.0000    | 129.0788 |                                                            |                         |    |    |   |   |
| SGO_1123 | 0.290                  | 7.812                | 0.0038  | 0.0129  | 57.000 | 35.000 | 59.5509    | 53.4474  | ffh; signal recognition particle protein                   |                         |    |    |   |   |
|          |                        |                      |         |         | 64.000 | 29.000 | 64.0000    | 47.6852  |                                                            |                         |    |    |   |   |
| SGO_1129 | -0.544                 | 5.782                | 0.0047  | 0.0173  | 12.500 | 10.500 | 13.0594    | 16.0342  | lplA; lipoate protein ligase A                             |                         |    |    |   |   |
|          |                        |                      |         |         | 9.500  | 10.000 | 9.5000     | 16.4432  |                                                            |                         |    |    |   |   |
| SGO_1130 | 2.380                  | 6.880                | 0.0001  | 0.0000  | 48.500 | 5.500  | 50.6705    | 8.3989   | dihydrolipoamide dehydrogenase                             |                         |    |    |   |   |
|          |                        |                      |         |         | 48.000 | 6.500  | 48.0000    | 10.6881  |                                                            |                         |    |    |   |   |
| SGO_1131 | 2.419                  | 5.484                | 0.0116  | 0.0560  | 21.000 | 2.500  | 21.9398    | 3.8177   | sucB; dihydrolipoamide S-acetyltransferase                 |                         |    |    |   |   |
|          |                        |                      |         |         | 19.000 |        | 19.0000    |          |                                                            |                         |    |    |   |   |
| SGO_1133 | 0.146                  | 5.214                | 0.0706  | 0.5025  | 13.500 |        | 14.1042    |          | acoA; acetoin dehydrogenase                                |                         |    |    |   |   |
|          |                        |                      |         |         | 11.500 | 7.000  | 11.5000    | 11.5102  |                                                            |                         |    |    |   |   |
| SGO_1134 | -2.886                 | 5.443                | 0.0357  | 0.2287  | 2.500  | 9.000  | 2.6119     | 13.7436  | hypothetical protein SGO_1134                              |                         |    |    |   |   |
|          |                        |                      |         |         |        | 16.500 |            | 27.1312  |                                                            |                         |    |    |   |   |
| SGO_1139 | 0.862                  | 6.582                | 0.0002  | 0.0001  | 29.000 | 11.500 | 30.2978    | 17.5613  | GTP-binding protein                                        |                         |    |    |   |   |
|          |                        |                      |         |         | 31.500 | 10.000 | 31.5000    | 16.4432  |                                                            |                         |    |    |   |   |
| SGO_1140 | 0.354                  | 8.166                | 0.0015  | 0.0034  | 77.500 | 39.000 | 80.9683    | 59.5557  | clpX; ATP-dependent Clp protease, ATP-binding subunit ClpX |                         |    |    |   |   |
|          |                        |                      |         |         | 80.000 | 40.500 | 80.0000    | 66.5948  |                                                            |                         |    |    |   |   |
| SGO_1141 | -1.422                 | 5.648                | 0.0080  | 0.0352  | 7.500  | 8.500  | 7.8356     | 12.9801  | folA; dihydrofolate reductase                              |                         |    |    |   |   |
|          |                        |                      |         |         | 5.500  | 14.500 | 5.5000     | 23.8426  |                                                            |                         |    |    |   |   |

- Show detected proteins only
- Show all proteins

Proteins found: 713

Filter by category: ABC Transporter

Test

Cutoff

q-Value

.005

p-Value

| Signif | Direction | Applies To   |
|--------|-----------|--------------|
| yes    | +         | ratios, bars |
| no     | n/a       | bars         |
| yes    | -         | ratios, bars |
| yes    | +         | p-, q-Values |
| yes    | -         | p-, q-Values |

Dot Plots Dot Plots

Summary Table

SgFn vs Sg

SgPg vs Sg

SgPgFn vs Sg

SgPg vs SgFn

SgPgFn vs SgFn

SgPgFn vs SgPg

Coverage

SgPg vs SgFn

Raw

Normalized

Log<sub>2</sub> Ratios

| Protein  | SgPg vs SgFn           |                      |         |         | Raw     |         | Normalized |          | Description                             | Log <sub>2</sub> Ratios |    |    |   |   |
|----------|------------------------|----------------------|---------|---------|---------|---------|------------|----------|-----------------------------------------|-------------------------|----|----|---|---|
|          | Log <sub>2</sub> Ratio | Log <sub>2</sub> Sum | q-Value | p-Value | SgPg    | SgFn    | SgPg       | SgFn     |                                         | -6                      | -4 | -2 | 0 | 2 |
| SGO_1143 | 0.877                  | 5.319                | 0.0041  | 0.0140  | 12.000  | 3.500   | 12.5370    | 5.3447   | thyA; thymidylate synthase              |                         |    |    |   |   |
|          |                        |                      |         |         | 13.000  | 5.500   | 13.0000    | 9.0437   |                                         |                         |    |    |   |   |
| SGO_1144 | -0.356                 | 9.774                | 0.0022  | 0.0056  | 184.000 | 152.500 | 192.2344   | 232.8779 | glcK; glucokinase                       |                         |    |    |   |   |
|          |                        |                      |         |         | 191.500 | 157.500 | 191.5000   | 258.9798 |                                         |                         |    |    |   |   |
| SGO_1150 | 0.721                  | 5.305                | 0.0023  | 0.0062  | 12.500  | 5.500   | 13.0594    | 8.3989   | hypothetical protein SGO_1150           |                         |    |    |   |   |
|          |                        |                      |         |         | 11.500  | 4.000   | 11.5000    | 6.5773   |                                         |                         |    |    |   |   |
| SGO_1151 | -0.562                 | 9.736                | 0.0001  | 0.0000  | 165.500 | 165.000 | 172.9065   | 251.9663 | glyA; serine hydroxymethyltransferase   |                         |    |    |   |   |
|          |                        |                      |         |         | 171.500 | 156.000 | 171.5000   | 256.5133 |                                         |                         |    |    |   |   |
| SGO_1154 | 0.220                  | 7.107                | 0.1010  | 0.7485  | 33.500  | 30.000  | 34.9992    | 45.8121  | prfA; peptide chain release factor 1    |                         |    |    |   |   |
|          |                        |                      |         |         | 36.500  | 12.500  | 36.5000    | 20.5539  |                                         |                         |    |    |   |   |
| SGO_1155 | 1.345                  | 5.132                | 0.0082  | 0.0365  | 9.000   | 4.500   | 9.4028     | 6.8718   | tdk; thymidine kinase                   |                         |    |    |   |   |
|          |                        |                      |         |         | 15.500  | 2.000   | 15.5000    | 3.2886   |                                         |                         |    |    |   |   |
| SGO_1159 | -0.794                 | 4.599                | 0.0100  | 0.0472  | 3.000   | 4.500   | 3.1343     | 6.8718   | guaC; guanosine monophosphate reductase |                         |    |    |   |   |
|          |                        |                      |         |         | 6.000   | 5.000   | 6.0000     | 8.2216   |                                         |                         |    |    |   |   |
| SGO_1167 | 2.059                  | 7.614                | 0.0000  | 0.0000  | 76.000  | 13.000  | 79.4012    | 19.8519  | nox; NADH oxidase                       |                         |    |    |   |   |
|          |                        |                      |         |         | 78.500  | 11.000  | 78.5000    | 18.0875  |                                         |                         |    |    |   |   |
| SGO_1169 | 1.376                  | 6.806                | 0.0027  | 0.0078  | 44.000  | 12.500  | 45.9691    | 19.0884  | NADPH-dependent FMN reductase           |                         |    |    |   |   |
|          |                        |                      |         |         | 34.500  | 7.500   | 34.5000    | 12.3324  |                                         |                         |    |    |   |   |
| SGO_1170 | 1.493                  | 7.367                | 0.0002  | 0.0001  | 60.000  | 15.500  | 62.6851    | 23.6696  | NADPH-dependent FMN reductase           |                         |    |    |   |   |
|          |                        |                      |         |         | 59.000  | 12.000  | 59.0000    | 19.7318  |                                         |                         |    |    |   |   |
| SGO_1171 | -0.390                 | 4.216                | 0.0429  | 0.2851  | 3.500   | 5.000   | 3.6566     | 7.6353   | thioredoxin family protein              |                         |    |    |   |   |
|          |                        |                      |         |         | 4.000   | 2.000   | 4.0000     | 3.2886   |                                         |                         |    |    |   |   |
| SGO_1185 | 1.176                  | 4.409                | 0.0260  | 0.1546  | 9.500   | 2.500   | 9.9251     | 3.8177   | acetyltransferase, GNAT family          |                         |    |    |   |   |
|          |                        |                      |         |         | 7.500   |         | 7.5000     |          |                                         |                         |    |    |   |   |

 Show detected proteins only Show all proteinsProteins found:  
713 Filter by category:

ABC Transporter

Test

Cutoff

q-Value

.005

p-Value

|             | Signif | Direction | Applies To   |
|-------------|--------|-----------|--------------|
| Red         | yes    | +         | ratios, bars |
| Yellow      | no     | n/a       | bars         |
| Green       | yes    | -         | ratios, bars |
| Pink        | yes    | +         | p-, q-Values |
| Light Green | yes    | -         | p-, q-Values |

Dot Plots Dot Plots

Summary Table

SgFn vs Sg

SgPg vs Sg

SgPgFn vs Sg

SgPg vs SgFn

SgPgFn vs SgFn

SgPgFn vs SgPg

Coverage

| Protein  | SgPg vs SgFn           |                      |         |         | Raw     |         | Normalized |          | Description                                  | Log <sub>2</sub> Ratios |    |    |   |   |
|----------|------------------------|----------------------|---------|---------|---------|---------|------------|----------|----------------------------------------------|-------------------------|----|----|---|---|
|          | Log <sub>2</sub> Ratio | Log <sub>2</sub> Sum | q-Value | p-Value | SgPg    | SgFn    | SgPg       | SgFn     |                                              | -6                      | -4 | -2 | 0 | 2 |
| SGO_1189 | -1.120                 | 6.592                | 0.0013  | 0.0026  | 12.500  | 20.000  | 13.0594    | 30.5414  | lipoprotein, putative                        |                         |    |    |   |   |
|          |                        |                      |         |         | 17.500  | 21.500  | 17.5000    | 35.3528  |                                              |                         |    |    |   |   |
| SGO_1191 | 1.155                  | 10.733               | 0.0002  | 0.0001  | 580.500 | 178.000 | 606.4788   | 271.8182 | rplL; ribosomal protein L7/L12               |                         |    |    |   |   |
|          |                        |                      |         |         | 568.000 | 155.500 | 568.0000   | 255.6911 |                                              |                         |    |    |   |   |
| SGO_1192 | 0.944                  | 9.110                | 0.0071  | 0.0297  | 141.000 | 50.500  | 147.3101   | 77.1170  | BL5; 50S ribosomal protein L10               |                         |    |    |   |   |
|          |                        |                      |         |         | 216.500 | 68.000  | 216.5000   | 111.8135 |                                              |                         |    |    |   |   |
| SGO_1193 | -0.451                 | 6.593                | 0.0082  | 0.0371  | 22.500  | 17.000  | 23.5069    | 25.9602  | gid; Glucose inhibited division protein A    |                         |    |    |   |   |
|          |                        |                      |         |         | 17.500  | 18.000  | 17.5000    | 29.5977  |                                              |                         |    |    |   |   |
| SGO_1197 | 0.702                  | 6.511                | 0.0076  | 0.0330  | 24.000  | 9.000   | 25.0741    | 13.7436  | topA; DNA topoisomerase I                    |                         |    |    |   |   |
|          |                        |                      |         |         | 31.000  | 13.000  | 31.0000    | 21.3761  |                                              |                         |    |    |   |   |
| SGO_1202 | -0.246                 | 5.510                | 0.0543  | 0.3719  | 8.000   | 6.500   | 8.3580     | 9.9259   | GTP-binding protein                          |                         |    |    |   |   |
|          |                        |                      |         |         | 12.500  | 9.000   | 12.5000    | 14.7988  |                                              |                         |    |    |   |   |
| SGO_1203 | -0.619                 | 6.766                | 0.0034  | 0.0112  | 19.000  | 19.500  | 19.8503    | 29.7778  | anaerobic ribonucleotide reductase           |                         |    |    |   |   |
|          |                        |                      |         |         | 23.000  | 22.000  | 23.0000    | 36.1750  |                                              |                         |    |    |   |   |
| SGO_1205 | -0.195                 | 4.889                | 0.0680  | 0.4795  | 5.500   | 7.500   | 5.7461     | 11.4530  | dapA; dihydrodipicolinate synthase           |                         |    |    |   |   |
|          |                        |                      |         |         | 7.500   | 3.000   | 7.5000     | 4.9329   |                                              |                         |    |    |   |   |
| SGO_1206 | -0.559                 | 6.998                | 0.0013  | 0.0029  | 25.500  | 23.500  | 26.6412    | 35.8861  | asd; aspartate-semialdehyde dehydrogenase    |                         |    |    |   |   |
|          |                        |                      |         |         | 25.000  | 24.500  | 25.0000    | 40.2857  |                                              |                         |    |    |   |   |
| SGO_1210 | -1.072                 | 5.922                | 0.0057  | 0.0223  | 12.500  | 11.500  | 13.0594    | 17.5613  | fhs-1; formate--tetrahydrofolate ligase      |                         |    |    |   |   |
|          |                        |                      |         |         | 7.000   | 14.000  | 7.0000     | 23.0204  |                                              |                         |    |    |   |   |
| SGO_1213 | -0.601                 | 3.733                | 0.0674  | 0.4737  | 3.000   | 4.500   | 3.1343     | 6.8718   | coaC; phosphopantothencysteine decarboxylase |                         |    |    |   |   |
|          |                        |                      |         |         |         | 2.000   |            | 3.2886   |                                              |                         |    |    |   |   |
| SGO_1215 | -0.176                 | 10.082               | 0.0080  | 0.0351  | 243.000 | 178.000 | 253.8748   | 271.8182 | manB; phosphomannomutase                     |                         |    |    |   |   |
|          |                        |                      |         |         | 254.500 | 184.500 | 254.5000   | 303.3763 |                                              |                         |    |    |   |   |

- Show detected proteins only
- Show all proteins

Proteins found: 713

Filter by category:

Test

Cutoff

q-Value

.005

p-Value

| Signif | Direction | Applies To   |
|--------|-----------|--------------|
| yes    | +         | ratios, bars |
| no     | n/a       | bars         |
| yes    | -         | ratios, bars |
| yes    | +         | p-, q-Values |
| yes    | -         | p-, q-Values |

Dot Plots Dot Plots

Summary Table

SgFn vs Sg

SgPg vs Sg

SgPgFn vs Sg

SgPg vs SgFn

SgPgFn vs SgFn

SgPgFn vs SgPg

Coverage

SgPg vs SgFn

Raw

Normalized

Log<sub>2</sub> Ratios

| Protein  | SgPg vs SgFn           |                      |         |         | Raw     |         | Normalized |          | Description                                           | Log <sub>2</sub> Ratios |    |    |   |   |
|----------|------------------------|----------------------|---------|---------|---------|---------|------------|----------|-------------------------------------------------------|-------------------------|----|----|---|---|
|          | Log <sub>2</sub> Ratio | Log <sub>2</sub> Sum | q-Value | p-Value | SgPg    | SgFn    | SgPg       | SgFn     |                                                       | -6                      | -4 | -2 | 0 | 2 |
| SGO_1216 | 0.419                  | 7.152                | 0.0080  | 0.0349  | 43.000  | 21.500  | 44.9244    | 32.8320  | bta; Possible bacteriocin transport accessory protein |                         |    |    |   |   |
|          |                        |                      |         |         | 36.500  | 17.000  | 36.5000    | 27.9534  |                                                       |                         |    |    |   |   |
| SGO_1219 | -0.901                 | 7.792                | 0.0163  | 0.0896  | 36.000  | 31.500  | 37.6111    | 48.1027  | pta; phosphate acetyltransferase                      |                         |    |    |   |   |
|          |                        |                      |         |         | 36.500  | 60.500  | 36.5000    | 99.4811  |                                                       |                         |    |    |   |   |
| SGO_1222 | 0.698                  | 2.693                |         |         |         |         |            |          | GTP pyrophosphokinase-like protein                    |                         |    |    |   |   |
|          |                        |                      |         |         | 4.000   | 1.500   | 4.0000     | 2.4665   |                                                       |                         |    |    |   |   |
| SGO_1224 | 1.455                  | 8.092                | 0.0003  | 0.0002  | 100.500 | 23.500  | 104.9976   | 35.8861  | Ribose-phosphate pyrophosphokinase 2                  |                         |    |    |   |   |
|          |                        |                      |         |         | 95.000  | 22.500  | 95.0000    | 36.9971  |                                                       |                         |    |    |   |   |
| SGO_1225 | 0.103                  | 5.035                | 0.1024  | 0.7602  | 7.000   | 4.000   | 7.3133     | 6.1083   | pyridoxal-phosphate dependent aminotransferase        |                         |    |    |   |   |
|          |                        |                      |         |         | 9.500   | 6.000   | 9.5000     | 9.8659   |                                                       |                         |    |    |   |   |
| SGO_1226 | -0.118                 | 6.216                | 0.0701  | 0.4969  | 16.000  | 10.000  | 16.7160    | 15.2707  | hypothetical protein SGO_1226                         |                         |    |    |   |   |
|          |                        |                      |         |         | 18.500  | 14.500  | 18.5000    | 23.8426  |                                                       |                         |    |    |   |   |
| SGO_1228 | -0.494                 | 4.758                | 0.0045  | 0.0167  | 6.000   | 5.500   | 6.2685     | 8.3989   | DNA-binding protein BH0551                            |                         |    |    |   |   |
|          |                        |                      |         |         | 5.000   | 4.500   | 5.0000     | 7.3994   |                                                       |                         |    |    |   |   |
| SGO_1231 | -0.689                 | 7.258                | 0.0135  | 0.0698  | 21.000  | 35.500  | 21.9398    | 54.2109  | gyrA; DNA gyrase, A subunit                           |                         |    |    |   |   |
|          |                        |                      |         |         | 37.500  | 24.000  | 37.5000    | 39.4636  |                                                       |                         |    |    |   |   |
| SGO_1232 | -0.020                 | 10.687               | 0.0601  | 0.4179  | 398.500 | 277.000 | 416.3338   | 422.9980 | L-lactate dehydrogenase                               |                         |    |    |   |   |
|          |                        |                      |         |         | 402.000 | 247.500 | 402.0000   | 406.9682 |                                                       |                         |    |    |   |   |
| SGO_1234 | 0.829                  | 10.222               | 0.0014  | 0.0032  | 368.500 | 163.000 | 384.9913   | 248.9122 | rpsA; 30S ribosomal protein S1                        |                         |    |    |   |   |
|          |                        |                      |         |         | 376.000 | 112.000 | 376.0000   | 184.1634 |                                                       |                         |    |    |   |   |
| SGO_1238 | -1.175                 | 7.336                | 0.0066  | 0.0269  | 23.500  | 46.000  | 24.5517    | 70.2451  | ilvE; branched-chain amino acid aminotransferase      |                         |    |    |   |   |
|          |                        |                      |         |         | 24.000  | 26.000  | 24.0000    | 42.7522  |                                                       |                         |    |    |   |   |
| SGO_1239 | 1.318                  | 5.182                | 0.0052  | 0.0202  | 11.500  | 2.000   | 12.0147    | 3.0541   | parC; DNA topoisomerase IV, A subunit                 |                         |    |    |   |   |
|          |                        |                      |         |         | 13.000  | 5.000   | 13.0000    | 8.2216   |                                                       |                         |    |    |   |   |

 Show detected proteins only Show all proteinsProteins found:  
713 Filter by category:

ABC Transporter

Test

Cutoff

q-Value

.005

p-Value

|             | Signif | Direction | Applies To   |
|-------------|--------|-----------|--------------|
| Red         | yes    | +         | ratios, bars |
| Yellow      | no     | n/a       | bars         |
| Green       | yes    | -         | ratios, bars |
| Pink        | yes    | +         | p-, q-Values |
| Light Green | yes    | -         | p-, q-Values |

Dot Plots Dot Plots

Summary Table

SgFn vs Sg

SgPg vs Sg

SgPgFn vs Sg

SgPg vs SgFn

SgPgFn vs SgFn

SgPgFn vs SgPg

Coverage

SgPg vs SgFn

Raw

Normalized

Log<sub>2</sub> Ratios

| Protein  | SgPg vs SgFn           |                      |         |         | Raw     |         | Normalized |          | Description                                                       | Log <sub>2</sub> Ratios |    |    |   |   |   |   |
|----------|------------------------|----------------------|---------|---------|---------|---------|------------|----------|-------------------------------------------------------------------|-------------------------|----|----|---|---|---|---|
|          | Log <sub>2</sub> Ratio | Log <sub>2</sub> Sum | q-Value | p-Value | SgPg    | SgFn    | SgPg       | SgFn     |                                                                   | -6                      | -4 | -2 | 0 | 2 | 4 | 6 |
| SGO_1248 | -0.965                 | 6.635                | 0.0161  | 0.0872  | 19.000  | 14.500  | 19.8503    | 22.1425  | pyrC; dihydroorotase                                              |                         |    |    |   |   |   |   |
|          |                        |                      |         |         | 13.000  | 27.000  | 13.0000    | 44.3965  |                                                                   |                         |    |    |   |   |   |   |
| SGO_1253 | 1.111                  | 6.169                | 0.0032  | 0.0103  | 22.000  | 10.000  | 22.9846    | 15.2707  | pyrE; orotate phosphoribosyltransferase                           |                         |    |    |   |   |   |   |
|          |                        |                      |         |         | 25.500  | 5.000   | 25.5000    | 8.2216   |                                                                   |                         |    |    |   |   |   |   |
| SGO_1257 | -0.991                 | 5.347                | 0.0106  | 0.0504  | 6.000   | 11.500  | 6.2685     | 17.5613  | probable transcriptional regulator (LysR family)                  |                         |    |    |   |   |   |   |
|          |                        |                      |         |         | 7.000   | 6.000   | 7.0000     | 9.8659   |                                                                   |                         |    |    |   |   |   |   |
| SGO_1260 | 1.058                  | 7.351                | 0.0002  | 0.0002  | 51.000  | 18.000  | 53.2824    | 27.4872  | deoD; purine nucleoside phosphorylase                             |                         |    |    |   |   |   |   |
|          |                        |                      |         |         | 57.000  | 15.500  | 57.0000    | 25.4869  |                                                                   |                         |    |    |   |   |   |   |
| SGO_1263 | 1.503                  | 7.938                | 0.0002  | 0.0001  | 84.000  | 22.000  | 87.7592    | 33.5955  | purine nucleoside phosphorylase I, inosine and guanosine-specific |                         |    |    |   |   |   |   |
|          |                        |                      |         |         | 93.500  | 18.500  | 93.5000    | 30.4198  |                                                                   |                         |    |    |   |   |   |   |
| SGO_1264 | -0.124                 | 9.567                | 0.0535  | 0.3653  | 177.500 | 149.500 | 185.4436   | 228.2967 | deoB; phosphopentomutase                                          |                         |    |    |   |   |   |   |
|          |                        |                      |         |         | 175.500 | 103.000 | 175.5000   | 169.3645 |                                                                   |                         |    |    |   |   |   |   |
| SGO_1265 | 1.083                  | 7.260                | 0.0003  | 0.0002  | 48.000  | 15.500  | 50.1481    | 23.6696  | rpiA; ribose 5-phosphate isomerase                                |                         |    |    |   |   |   |   |
|          |                        |                      |         |         | 54.000  | 15.500  | 54.0000    | 25.4869  |                                                                   |                         |    |    |   |   |   |   |
| SGO_1266 | -0.086                 | 6.119                | 0.0707  | 0.5041  | 18.000  | 11.000  | 18.8055    | 16.7978  | trmE; tRNA modification GTPase TrmE                               |                         |    |    |   |   |   |   |
|          |                        |                      |         |         | 15.000  | 11.500  | 15.0000    | 18.9096  |                                                                   |                         |    |    |   |   |   |   |
| SGO_1273 | 1.594                  | 8.036                | 0.0006  | 0.0008  | 93.000  | 27.000  | 97.1620    | 41.2308  | rpoD; RNA polymerase sigma factor                                 |                         |    |    |   |   |   |   |
|          |                        |                      |         |         | 98.500  | 15.500  | 98.5000    | 25.4869  |                                                                   |                         |    |    |   |   |   |   |
| SGO_1276 | 1.877                  | 6.842                | 0.0007  | 0.0010  | 39.000  | 8.500   | 40.7453    | 12.9801  | rpsU; ribosomal protein S21                                       |                         |    |    |   |   |   |   |
|          |                        |                      |         |         | 49.500  | 7.000   | 49.5000    | 11.5102  |                                                                   |                         |    |    |   |   |   |   |
| SGO_1281 | 1.879                  | 4.379                | 0.0216  | 0.1249  | 7.500   |         | 7.8356     |          | penicillinase repressor, putative                                 |                         |    |    |   |   |   |   |
|          |                        |                      |         |         | 10.500  | 1.500   | 10.5000    | 2.4665   |                                                                   |                         |    |    |   |   |   |   |
| SGO_1283 | 1.115                  | 7.864                | 0.0006  | 0.0008  | 77.500  | 27.500  | 80.9683    | 41.9944  | oxidoreductase                                                    |                         |    |    |   |   |   |   |
|          |                        |                      |         |         | 78.000  | 19.500  | 78.0000    | 32.0642  |                                                                   |                         |    |    |   |   |   |   |

 Show detected proteins only Show all proteinsProteins found:  
713 Filter by category:

ABC Transporter

Test

Cutoff

q-Value

.005

p-Value

|             | Signif | Direction | Applies To   |
|-------------|--------|-----------|--------------|
| Red         | yes    | +         | ratios, bars |
| Yellow      | no     | n/a       | bars         |
| Green       | yes    | -         | ratios, bars |
| Pink        | yes    | +         | p-, q-Values |
| Light Green | yes    | -         | p-, q-Values |

Dot Plots Dot Plots

Summary Table

SgFn vs Sg

SgPg vs Sg

SgPgFn vs Sg

SgPg vs SgFn

SgPgFn vs SgFn

SgPgFn vs SgPg

Coverage

| Protein  | SgPg vs SgFn           |                      |         |         | Raw     |         | Normalized |          | Description                                        | Log <sub>2</sub> Ratios |    |    |   |   |
|----------|------------------------|----------------------|---------|---------|---------|---------|------------|----------|----------------------------------------------------|-------------------------|----|----|---|---|
|          | Log <sub>2</sub> Ratio | Log <sub>2</sub> Sum | q-Value | p-Value | SgPg    | SgFn    | SgPg       | SgFn     |                                                    | -6                      | -4 | -2 | 0 | 2 |
| SGO_1284 | 0.508                  | 5.424                | 0.0537  | 0.3677  | 17.000  | 3.500   | 17.7608    | 5.3447   | thioredoxin-disulfide reductase                    |                         |    |    |   |   |
|          |                        |                      |         |         | 7.500   | 7.500   | 7.5000     | 12.3324  |                                                    |                         |    |    |   |   |
| SGO_1293 | 0.303                  | 7.365                | 0.0076  | 0.0328  | 46.500  | 22.500  | 48.5810    | 34.3590  | asnS; asparaginyl-tRNA synthetase                  |                         |    |    |   |   |
|          |                        |                      |         |         | 42.500  | 24.000  | 42.5000    | 39.4636  |                                                    |                         |    |    |   |   |
| SGO_1297 | -1.260                 | 6.958                | 0.0033  | 0.0109  | 16.500  | 34.000  | 17.2384    | 51.9203  | aspC; aspartate aminotransferase                   |                         |    |    |   |   |
|          |                        |                      |         |         | 19.000  | 22.000  | 19.0000    | 36.1750  |                                                    |                         |    |    |   |   |
| SGO_1312 | 0.028                  | 7.925                | 0.0440  | 0.2936  | 60.000  | 40.000  | 62.6851    | 61.0827  | pepT; peptidase T                                  |                         |    |    |   |   |
|          |                        |                      |         |         | 60.000  | 36.000  | 60.0000    | 59.1954  |                                                    |                         |    |    |   |   |
| SGO_1315 | -1.287                 | 3.485                | 0.0152  | 0.0809  | 2.000   | 4.000   | 2.0895     | 6.1083   | trmD; tRNA (guanine-N1)-methyltransferase          |                         |    |    |   |   |
|          |                        |                      |         |         | 3.000   |         | 3.0000     |          |                                                    |                         |    |    |   |   |
| SGO_1316 | 0.360                  | 4.180                | 0.0050  | 0.0190  | 4.500   | 2.500   | 4.7014     | 3.8177   | 16S rRNA processing protein RimM                   |                         |    |    |   |   |
|          |                        |                      |         |         | 5.500   | 2.500   | 5.5000     | 4.1108   |                                                    |                         |    |    |   |   |
| SGO_1323 | 0.692                  | 7.175                | 0.0021  | 0.0051  | 39.500  | 19.500  | 41.2677    | 29.7778  | rpsP; ribosomal protein S16                        |                         |    |    |   |   |
|          |                        |                      |         |         | 48.000  | 15.500  | 48.0000    | 25.4869  |                                                    |                         |    |    |   |   |
| SGO_1327 | 0.395                  | 5.518                | 0.0009  | 0.0015  | 12.000  | 6.500   | 12.5370    | 9.9259   | HAD-superfamily subfamily IIA hydrolase, TIGR01457 |                         |    |    |   |   |
|          |                        |                      |         |         | 13.500  | 6.000   | 13.5000    | 9.8659   |                                                    |                         |    |    |   |   |
| SGO_1336 | -0.326                 | 5.865                | 0.0282  | 0.1730  | 13.000  | 8.500   | 13.5818    | 12.9801  | pcrA; ATP-dependent DNA helicase PcrA              |                         |    |    |   |   |
|          |                        |                      |         |         | 12.000  | 12.000  | 12.0000    | 19.7318  |                                                    |                         |    |    |   |   |
| SGO_1338 | -2.307                 | 4.446                | 0.0012  | 0.0024  |         | 6.500   |            | 9.9259   | Signal peptidase I                                 |                         |    |    |   |   |
|          |                        |                      |         |         | 2.000   | 6.000   | 2.0000     | 9.8659   |                                                    |                         |    |    |   |   |
| SGO_1339 | 0.431                  | 11.551               | 0.0019  | 0.0043  | 803.500 | 447.500 | 839.4586   | 683.3631 | pyk; pyruvate kinase                               |                         |    |    |   |   |
|          |                        |                      |         |         | 882.500 | 362.500 | 882.5000   | 596.0645 |                                                    |                         |    |    |   |   |
| SGO_1340 | -0.483                 | 10.273               | 0.0008  | 0.0011  | 246.000 | 227.000 | 257.0091   | 346.6445 | Phosphofructokinase                                |                         |    |    |   |   |
|          |                        |                      |         |         | 259.000 | 228.000 | 259.0000   | 374.9040 |                                                    |                         |    |    |   |   |

- Show detected proteins only
- Show all proteins

Proteins found: 713

Filter by category:

ABC Transporter

Test

Cutoff

q-Value

.005

p-Value

|             | Signif | Direction | Applies To   |
|-------------|--------|-----------|--------------|
| Red         | yes    | +         | ratios, bars |
| Yellow      | no     | n/a       | bars         |
| Green       | yes    | -         | ratios, bars |
| Pink        | yes    | +         | p-, q-Values |
| Light Green | yes    | -         | p-, q-Values |

Dot Plots Dot Plots

Summary Table SgFn vs Sg SgPg vs Sg SgPgFn vs Sg SgPg vs SgFn SgPgFn vs SgFn SgPgFn vs SgPg Coverage

| Protein  | SgPg vs SgFn           |                      |         |         | Raw     |         | Normalized |          | Description                                         | Log <sub>2</sub> Ratios |    |    |   |   |
|----------|------------------------|----------------------|---------|---------|---------|---------|------------|----------|-----------------------------------------------------|-------------------------|----|----|---|---|
|          | Log <sub>2</sub> Ratio | Log <sub>2</sub> Sum | q-Value | p-Value | SgPg    | SgFn    | SgPg       | SgFn     |                                                     | -6                      | -4 | -2 | 0 | 2 |
| SGO_1341 | -1.469                 | 4.431                | 0.0448  | 0.3009  | 3.000   | 4.000   | 3.1343     | 6.1083   | dnaE; DNA-directed DNA polymerase III alpha chain   |                         |    |    |   |   |
|          |                        |                      |         |         |         | 7.500   |            | 12.3324  |                                                     |                         |    |    |   |   |
| SGO_1342 | -0.755                 | 9.403                | 0.0030  | 0.0092  | 128.000 | 155.000 | 133.7283   | 236.6956 | ABC transporter, ATP-binding protein SP1715         |                         |    |    |   |   |
|          |                        |                      |         |         | 117.500 | 115.000 | 117.5000   | 189.0963 |                                                     |                         |    |    |   |   |
| SGO_1364 | 0.652                  | 5.934                | 0.0013  | 0.0028  | 17.500  | 7.000   | 18.2832    | 10.6895  | rumA-2; 23S rRNA (uracil-5-)-methyltransferase RumA |                         |    |    |   |   |
|          |                        |                      |         |         | 19.000  | 8.000   | 19.0000    | 13.1545  |                                                     |                         |    |    |   |   |
| SGO_1365 | -2.745                 | 5.496                | 0.0007  | 0.0010  | 4.000   | 11.500  | 4.1790     | 17.5613  | transcription regulator yrfE                        |                         |    |    |   |   |
|          |                        |                      |         |         | 2.000   | 13.000  | 2.0000     | 21.3761  |                                                     |                         |    |    |   |   |
| SGO_1367 | -1.851                 | 4.827                | 0.0009  | 0.0014  | 3.000   | 6.500   | 3.1343     | 9.9259   | aroK; shikimate kinase                              |                         |    |    |   |   |
|          |                        |                      |         |         | 3.000   | 7.500   | 3.0000     | 12.3324  |                                                     |                         |    |    |   |   |
| SGO_1368 | -1.086                 | 5.261                | 0.0005  | 0.0005  | 6.000   | 9.000   | 6.2685     | 13.7436  | aroA; 3-phosphoshikimate 1-carboxyvinyltransferase  |                         |    |    |   |   |
|          |                        |                      |         |         | 6.000   | 7.500   | 6.0000     | 12.3324  |                                                     |                         |    |    |   |   |
| SGO_1369 | -3.364                 | 7.878                | 0.0001  | 0.0000  | 9.000   | 72.500  | 9.4028     | 110.7125 | L-2-hydroxyisocaproate dehydrogenase                |                         |    |    |   |   |
|          |                        |                      |         |         | 11.500  | 63.000  | 11.5000    | 103.5919 |                                                     |                         |    |    |   |   |
| SGO_1370 | -0.075                 | 6.763                | 0.0826  | 0.6023  | 27.500  | 21.000  | 28.7307    | 32.0684  | Protein of unknown function (DUF964) superfamily    |                         |    |    |   |   |
|          |                        |                      |         |         | 24.000  | 14.500  | 24.0000    | 23.8426  |                                                     |                         |    |    |   |   |
| SGO_1372 | 1.399                  | 4.953                | 0.0083  | 0.0379  | 12.000  |         | 12.5370    |          | aroC; chorismate synthase                           |                         |    |    |   |   |
|          |                        |                      |         |         | 13.500  | 3.000   | 13.5000    | 4.9329   |                                                     |                         |    |    |   |   |
| SGO_1373 | -0.102                 | 4.405                | 0.0224  | 0.1302  | 6.500   |         | 6.7909     |          | aroB; 3-dehydroquinate synthase                     |                         |    |    |   |   |
|          |                        |                      |         |         | 7.000   | 4.500   | 7.0000     | 7.3994   |                                                     |                         |    |    |   |   |
| SGO_1375 | 0.638                  | 5.497                | 0.0111  | 0.0536  | 16.000  | 5.500   | 16.7160    | 8.3989   | aroD; 3-dehydroquinate dehydratase, type I          |                         |    |    |   |   |
|          |                        |                      |         |         | 11.000  | 5.500   | 11.0000    | 9.0437   |                                                     |                         |    |    |   |   |
| SGO_1377 | -0.693                 | 6.527                | 0.0002  | 0.0001  | 16.500  | 19.000  | 17.2384    | 29.0143  | sulfatase                                           |                         |    |    |   |   |
|          |                        |                      |         |         | 18.000  | 17.000  | 18.0000    | 27.9534  |                                                     |                         |    |    |   |   |

Show detected proteins only  
 Show all proteins  
 Filter by category:

Proteins found: 713

**Test**      **Cutoff**  
     

| Signif | Direction | Applies To   |
|--------|-----------|--------------|
| yes    | +         | ratios, bars |
| no     | n/a       | bars         |
| yes    | -         | ratios, bars |
| yes    | +         | p-, q-Values |
| yes    | -         | p-, q-Values |

[Dot Plots](#)

Summary Table

SgFn vs Sg

SgPg vs Sg

SgPgFn vs Sg

SgPg vs SgFn

SgPgFn vs SgFn

SgPgFn vs SgPg

Coverage

SgPg vs SgFn

Raw

Normalized

Log<sub>2</sub> Ratios

| Protein  | SgPg vs SgFn           |                      |         |         | Raw      |          | Normalized |           | Description                                               | Log <sub>2</sub> Ratios |    |    |   |   |
|----------|------------------------|----------------------|---------|---------|----------|----------|------------|-----------|-----------------------------------------------------------|-------------------------|----|----|---|---|
|          | Log <sub>2</sub> Ratio | Log <sub>2</sub> Sum | q-Value | p-Value | SgPg     | SgFn     | SgPg       | SgFn      |                                                           | -6                      | -4 | -2 | 0 | 2 |
| SGO_1381 | -0.525                 | 6.005                | 0.0188  | 0.1061  | 10.000   | 14.500   | 10.4475    | 22.1425   | csn1; CRISPR-associated protein, Csn1 family              |                         |    |    |   |   |
|          |                        |                      |         |         | 16.000   | 9.500    | 16.0000    | 15.6210   |                                                           |                         |    |    |   |   |
| SGO_1383 | 0.595                  | 8.571                | 0.0030  | 0.0093  | 102.000  | 44.500   | 106.5647   | 67.9545   | rplS; ribosomal protein L19                               |                         |    |    |   |   |
|          |                        |                      |         |         | 122.000  | 51.000   | 122.0000   | 83.8601   |                                                           |                         |    |    |   |   |
| SGO_1386 | -2.592                 | 6.069                | 0.0018  | 0.0042  | 6.000    | 15.500   | 6.2685     | 23.6696   | chorismate mutase                                         |                         |    |    |   |   |
|          |                        |                      |         |         | 3.500    | 20.500   | 3.5000     | 33.7085   |                                                           |                         |    |    |   |   |
| SGO_1390 | -0.240                 | 5.074                | 0.0349  | 0.2218  | 8.000    | 5.000    | 8.3580     | 7.6353    | ligA; DNA ligase, NAD-dependent                           |                         |    |    |   |   |
|          |                        |                      |         |         | 7.000    | 6.500    | 7.0000     | 10.6881   |                                                           |                         |    |    |   |   |
| SGO_1394 | -0.126                 | 4.153                | 0.1186  | 0.8978  | 4.000    | 4.000    | 4.1790     | 6.1083    | hypothetical protein SGO_1394                             |                         |    |    |   |   |
|          |                        |                      |         |         | 7.500    |          | 7.5000     |           |                                                           |                         |    |    |   |   |
| SGO_1397 | -0.101                 | 6.641                | 0.0692  | 0.4893  | 25.500   | 15.000   | 26.6412    | 22.9060   | map; methionine aminopeptidase, type I                    |                         |    |    |   |   |
|          |                        |                      |         |         | 21.500   | 17.500   | 21.5000    | 28.7755   |                                                           |                         |    |    |   |   |
| SGO_1398 | -0.036                 | 4.232                | 0.1077  | 0.8090  | 5.000    | 2.500    | 5.2238     | 3.8177    | hypothetical protein SGO_1398                             |                         |    |    |   |   |
|          |                        |                      |         |         | 4.000    | 3.500    | 4.0000     | 5.7551    |                                                           |                         |    |    |   |   |
| SGO_1400 | -0.501                 | 5.556                | 0.0058  | 0.0230  | 10.000   | 10.000   | 10.4475    | 15.2707   | murA-2; UDP-N-acetylglucosamine 1-carboxyvinyltransferase |                         |    |    |   |   |
|          |                        |                      |         |         | 9.000    | 7.500    | 9.0000     | 12.3324   |                                                           |                         |    |    |   |   |
| SGO_1413 | -0.910                 | 4.834                | 0.0232  | 0.1353  | 4.500    | 3.500    | 4.7014     | 5.3447    | first chain of major exonuclease RexA                     |                         |    |    |   |   |
|          |                        |                      |         |         | 4.500    | 8.500    | 4.5000     | 13.9767   |                                                           |                         |    |    |   |   |
| SGO_1414 | -2.079                 | 5.022                | 0.0038  | 0.0129  | 2.500    | 6.500    | 2.6119     | 9.9259    | rexB; putative exonuclease RexB                           |                         |    |    |   |   |
|          |                        |                      |         |         | 3.500    | 10.000   | 3.5000     | 16.4432   |                                                           |                         |    |    |   |   |
| SGO_1422 | -1.700                 | 7.234                | 0.0037  | 0.0120  | 17.000   | 29.500   | 17.7608    | 45.0485   | hypothetical protein SGO_1422                             |                         |    |    |   |   |
|          |                        |                      |         |         | 17.000   | 43.000   | 17.0000    | 70.7056   |                                                           |                         |    |    |   |   |
| SGO_1426 | 0.874                  | 14.250               | 0.0003  | 0.0003  | 5900.500 | 2120.500 | 6164.5617  | 3238.1486 | eno; enolase                                              |                         |    |    |   |   |
|          |                        |                      |         |         | 6433.500 | 2216.500 | 6433.5000  | 3644.6263 |                                                           |                         |    |    |   |   |

- Show detected proteins only  
 Show all proteins

Proteins found:  
713

Filter by category:

ABC Transporter

Test

Cutoff

q-Value

.005

p-Value

|             | Signif | Direction | Applies To   |
|-------------|--------|-----------|--------------|
| Red         | yes    | +         | ratios, bars |
| Yellow      | no     | n/a       | bars         |
| Green       | yes    | -         | ratios, bars |
| Pink        | yes    | +         | p-, q-Values |
| Light Green | yes    | -         | p-, q-Values |

Dot Plots Dot Plots



Summary Table

SgFn vs Sg

SgPg vs Sg

SgPgFn vs Sg

SgPg vs SgFn

SgPgFn vs SgFn

SgPgFn vs SgPg

Coverage

SgPg vs SgFn

Raw

Normalized

Log<sub>2</sub> Ratios

| Protein  | SgPg vs SgFn           |                      |         |         | Raw     |         | Normalized |          | Description                                                                      | Log <sub>2</sub> Ratios |    |    |   |   |
|----------|------------------------|----------------------|---------|---------|---------|---------|------------|----------|----------------------------------------------------------------------------------|-------------------------|----|----|---|---|
|          | Log <sub>2</sub> Ratio | Log <sub>2</sub> Sum | q-Value | p-Value | SgPg    | SgFn    | SgPg       | SgFn     |                                                                                  | -6                      | -4 | -2 | 0 | 2 |
| SGO_1431 | -0.244                 | 9.039                | 0.0119  | 0.0586  | 117.500 | 102.000 | 122.7584   | 155.7610 | EzrA; Septation ring formation regulator<br>ezrA                                 |                         |    |    |   |   |
|          |                        |                      |         |         | 117.500 | 79.000  | 117.5000   | 129.9010 |                                                                                  |                         |    |    |   |   |
| SGO_1432 | 0.560                  | 7.005                | 0.0084  | 0.0385  | 31.000  | 16.000  | 32.3873    | 24.4331  | gyrB; DNA gyrase, B subunit                                                      |                         |    |    |   |   |
|          |                        |                      |         |         | 44.500  | 16.500  | 44.5000    | 27.1312  |                                                                                  |                         |    |    |   |   |
| SGO_1434 | -0.001                 | 4.256                | 0.1190  | 0.9037  | 3.500   | 3.500   | 3.6566     | 5.3447   | thiJ; 4-methyl-5(beta-hydroxyethyl)-<br>thiazole monophosphate synthesis protein |                         |    |    |   |   |
|          |                        |                      |         |         | 6.000   | 2.500   | 6.0000     | 4.1108   |                                                                                  |                         |    |    |   |   |
| SGO_1439 | 0.062                  | 5.394                | 0.0593  | 0.4113  | 11.000  | 7.000   | 11.4923    | 10.6895  | ftsX; cell division protein FtsX                                                 |                         |    |    |   |   |
|          |                        |                      |         |         | 10.000  | 6.000   | 10.0000    | 9.8659   |                                                                                  |                         |    |    |   |   |
| SGO_1440 | -1.158                 | 7.555                | 0.0000  | 0.0000  | 27.000  | 42.500  | 28.2083    | 64.9004  | cell-division ATP-binding protein FtsE                                           |                         |    |    |   |   |
|          |                        |                      |         |         | 30.000  | 39.500  | 30.0000    | 64.9505  |                                                                                  |                         |    |    |   |   |
| SGO_1441 | -0.537                 | 6.479                | 0.0212  | 0.1216  | 13.500  | 14.000  | 14.1042    | 21.3790  | prfB; peptide chain release factor 2                                             |                         |    |    |   |   |
|          |                        |                      |         |         | 22.500  | 19.000  | 22.5000    | 31.2420  |                                                                                  |                         |    |    |   |   |
| SGO_1446 | 0.497                  | 6.145                | 0.0048  | 0.0181  | 18.500  | 8.500   | 19.3279    | 12.9801  | murF; UDP-N-acetylmuramoyl-tripeptide--<br>D-alanyl-D-alanine ligase             |                         |    |    |   |   |
|          |                        |                      |         |         | 22.000  | 10.000  | 22.0000    | 16.4432  |                                                                                  |                         |    |    |   |   |
| SGO_1447 | 0.502                  | 6.584                | 0.0037  | 0.0122  | 29.500  | 13.000  | 30.8202    | 19.8519  | ddlA; D-Ala-D-Ala ligase                                                         |                         |    |    |   |   |
|          |                        |                      |         |         | 25.500  | 12.000  | 25.5000    | 19.7318  |                                                                                  |                         |    |    |   |   |
| SGO_1450 | -0.175                 | 5.241                | 0.0703  | 0.4995  | 10.500  | 6.000   | 10.9699    | 9.1624   | hypothetical protein SGO_1450                                                    |                         |    |    |   |   |
|          |                        |                      |         |         | 7.000   | 6.500   | 7.0000     | 10.6881  |                                                                                  |                         |    |    |   |   |
| SGO_1451 | 0.866                  | 6.911                | 0.0024  | 0.0066  | 37.000  | 17.000  | 38.6558    | 25.9602  | frr; ribosome recycling factor                                                   |                         |    |    |   |   |
|          |                        |                      |         |         | 38.500  | 10.500  | 38.5000    | 17.2653  |                                                                                  |                         |    |    |   |   |
| SGO_1452 | 0.790                  | 6.962                | 0.0074  | 0.0313  | 45.500  | 15.000  | 47.5362    | 22.9060  | pyrH; uridylate kinase                                                           |                         |    |    |   |   |
|          |                        |                      |         |         | 32.000  | 13.500  | 32.0000    | 22.1983  |                                                                                  |                         |    |    |   |   |
| SGO_1453 | 1.869                  | 3.936                |         |         | 11.500  |         | 12.0147    |          | glycosyl transferase, family 8 SP1766                                            |                         |    |    |   |   |
|          |                        |                      |         |         |         | 2.000   |            | 3.2886   |                                                                                  |                         |    |    |   |   |

- Show detected proteins only  
 Show all proteins

Proteins found:  
713

Filter by category:

ABC Transporter

Test

Cutoff

q-Value

.005

p-Value

|             | Signif | Direction | Applies To   |
|-------------|--------|-----------|--------------|
| Red         | yes    | +         | ratios, bars |
| Yellow      | no     | n/a       | bars         |
| Green       | yes    | -         | ratios, bars |
| Pink        | yes    | +         | p-, q-Values |
| Light Green | yes    | -         | p-, q-Values |

Dot Plots Dot Plots

Summary Table

SgFn vs Sg

SgPg vs Sg

SgPgFn vs Sg

SgPg vs SgFn

SgPgFn vs SgFn

SgPgFn vs SgPg

Coverage

| Protein  | SgPg vs SgFn           |                      |         |         | Raw     |        | Normalized |          | Description                                                | Log <sub>2</sub> Ratios |    |    |   |   |   |   |
|----------|------------------------|----------------------|---------|---------|---------|--------|------------|----------|------------------------------------------------------------|-------------------------|----|----|---|---|---|---|
|          | Log <sub>2</sub> Ratio | Log <sub>2</sub> Sum | q-Value | p-Value | SgPg    | SgFn   | SgPg       | SgFn     |                                                            | -6                      | -4 | -2 | 0 | 2 | 4 | 6 |
| SGO_1455 | 1.187                  | 9.545                | 0.0031  | 0.0097  | 208.000 | 72.500 | 217.3085   | 110.7125 | rplA; ribosomal protein L1                                 |                         |    |    |   |   |   |   |
|          |                        |                      |         |         | 304.000 | 70.000 | 304.0000   | 115.1021 |                                                            |                         |    |    |   |   |   |   |
| SGO_1456 | 1.186                  | 7.235                | 0.0044  | 0.0159  | 41.500  | 18.500 | 43.3572    | 28.2508  | rplK; ribosomal protein L11                                |                         |    |    |   |   |   |   |
|          |                        |                      |         |         | 61.000  | 11.000 | 61.0000    | 18.0875  |                                                            |                         |    |    |   |   |   |   |
| SGO_1458 | -2.418                 | 5.291                | 0.0023  | 0.0064  | 3.500   | 13.000 | 3.6566     | 19.8519  | aha1; cation-transporting ATPase yfgQ                      |                         |    |    |   |   |   |   |
|          |                        |                      |         |         | 2.500   | 8.000  | 2.5000     | 13.1545  |                                                            |                         |    |    |   |   |   |   |
| SGO_1459 | -3.101                 | 4.837                | 0.0133  | 0.0686  | 1.500   | 8.000  | 1.5671     | 12.2165  | glyoxylase family protein                                  |                         |    |    |   |   |   |   |
|          |                        |                      |         |         |         | 9.000  |            | 14.7988  |                                                            |                         |    |    |   |   |   |   |
| SGO_1460 | 1.242                  | 5.000                | 0.0001  | 0.0000  | 11.000  | 3.000  | 11.4923    | 4.5812   | DNA translocase ftsK                                       |                         |    |    |   |   |   |   |
|          |                        |                      |         |         | 11.000  | 3.000  | 11.0000    | 4.9329   |                                                            |                         |    |    |   |   |   |   |
| SGO_1463 | 0.841                  | 5.569                | 0.0059  | 0.0232  | 16.000  | 7.000  | 16.7160    | 10.6895  | peptidyl-prolyl cis-trans isomerase                        |                         |    |    |   |   |   |   |
|          |                        |                      |         |         | 13.500  | 4.000  | 13.5000    | 6.5773   |                                                            |                         |    |    |   |   |   |   |
| SGO_1465 | 1.867                  | 6.138                | 0.0013  | 0.0026  | 30.000  | 4.500  | 31.3426    | 6.8718   | ABC transporter, ATP-binding protein SPO770                |                         |    |    |   |   |   |   |
|          |                        |                      |         |         | 24.000  | 5.000  | 24.0000    | 8.2216   |                                                            |                         |    |    |   |   |   |   |
| SGO_1466 | -0.483                 | 5.149                | 0.0044  | 0.0157  | 8.000   | 6.500  | 8.3580     | 9.9259   | MTA/SAH nucleosidase                                       |                         |    |    |   |   |   |   |
|          |                        |                      |         |         | 6.500   | 6.500  | 6.5000     | 10.6881  |                                                            |                         |    |    |   |   |   |   |
| SGO_1469 | 0.705                  | 7.228                | 0.0004  | 0.0003  | 43.000  | 19.000 | 44.9244    | 29.0143  | glmU; UDP-N-acetylglucosamine pyrophosphorylase            |                         |    |    |   |   |   |   |
|          |                        |                      |         |         | 48.000  | 17.000 | 48.0000    | 27.9534  |                                                            |                         |    |    |   |   |   |   |
| SGO_1472 | -0.627                 | 4.934                | 0.0371  | 0.2402  | 7.500   | 8.500  | 7.8356     | 12.9801  | acetyltransferase, GNAT family                             |                         |    |    |   |   |   |   |
|          |                        |                      |         |         | 4.000   | 3.500  | 4.0000     | 5.7551   |                                                            |                         |    |    |   |   |   |   |
| SGO_1487 | -3.229                 | 5.637                | 0.0167  | 0.0923  |         | 17.500 |            | 26.7237  | LPXTG cell wall surface protein, Cna protein B-type domain |                         |    |    |   |   |   |   |
|          |                        |                      |         |         | 2.500   | 12.500 | 2.5000     | 20.5539  |                                                            |                         |    |    |   |   |   |   |
| SGO_1493 | -1.164                 | 5.045                | 0.0191  | 0.1084  |         | 8.000  |            | 12.2165  | hypothetical protein SGO_1493                              |                         |    |    |   |   |   |   |
|          |                        |                      |         |         | 6.000   | 9.000  | 6.0000     | 14.7988  |                                                            |                         |    |    |   |   |   |   |

- Show detected proteins only
- Show all proteins

Proteins found: 713

Filter by category:

ABC Transporter

Test

Cutoff

q-Value

.005

p-Value

|             | Signif | Direction | Applies To   |
|-------------|--------|-----------|--------------|
| Red         | yes    | +         | ratios, bars |
| Yellow      | no     | n/a       | bars         |
| Green       | yes    | -         | ratios, bars |
| Pink        | yes    | +         | p-, q-Values |
| Light Green | yes    | -         | p-, q-Values |

Dot Plots Dot Plots

Summary Table SgFn vs Sg SgPg vs Sg SgPgFn vs Sg SgPg vs SgFn SgPgFn vs SgFn SgPgFn vs SgPg Coverage

| Protein  | SgPg vs SgFn           |                      |         |         | Raw     |         | Normalized |          | Description                              | Log <sub>2</sub> Ratios |    |    |   |   |
|----------|------------------------|----------------------|---------|---------|---------|---------|------------|----------|------------------------------------------|-------------------------|----|----|---|---|
|          | Log <sub>2</sub> Ratio | Log <sub>2</sub> Sum | q-Value | p-Value | SgPg    | SgFn    | SgPg       | SgFn     |                                          | -6                      | -4 | -2 | 0 | 2 |
| SGO_1512 | -0.358                 | 3.726                | 0.0645  | 0.4512  | 3.500   | 2.500   | 3.6566     | 3.8177   | lacG; 6-phospho-beta-galactosidase       |                         |    |    |   |   |
|          |                        |                      |         |         |         | 3.500   |            | 5.7551   |                                          |                         |    |    |   |   |
| SGO_1529 | -0.089                 | 4.876                | 0.1076  | 0.8056  | 8.500   | 5.500   | 8.8804     | 8.3989   | hypothetical protein SGO_1529            |                         |    |    |   |   |
|          |                        |                      |         |         | 5.500   | 4.000   | 5.5000     | 6.5773   |                                          |                         |    |    |   |   |
| SGO_1530 | 0.700                  | 7.741                | 0.0048  | 0.0180  | 66.000  | 32.500  | 68.9537    | 49.6297  | methionine-tRNA ligase                   |                         |    |    |   |   |
|          |                        |                      |         |         | 62.500  | 20.000  | 62.5000    | 32.8863  |                                          |                         |    |    |   |   |
| SGO_1531 | 0.677                  | 5.972                | 0.0060  | 0.0243  | 20.000  | 9.500   | 20.8950    | 14.5072  | xth; exodeoxyribonuclease III            |                         |    |    |   |   |
|          |                        |                      |         |         | 17.500  | 6.000   | 17.5000    | 9.8659   |                                          |                         |    |    |   |   |
| SGO_1534 | -0.106                 | 5.567                | 0.1294  | 0.9952  | 15.500  | 8.000   | 16.1937    | 12.2165  | ArsC family                              |                         |    |    |   |   |
|          |                        |                      |         |         | 7.500   | 7.000   | 7.5000     | 11.5102  |                                          |                         |    |    |   |   |
| SGO_1536 | 0.903                  | 5.581                | 0.0127  | 0.0647  | 19.000  | 6.500   | 19.8503    | 9.9259   | conserved hypothetical protein TIGR00096 |                         |    |    |   |   |
|          |                        |                      |         |         | 11.500  | 4.000   | 11.5000    | 6.5773   |                                          |                         |    |    |   |   |
| SGO_1539 | 0.379                  | 5.928                | 0.0213  | 0.1226  | 15.000  | 10.500  | 15.6713    | 16.0342  | tmk; thymidylate kinase                  |                         |    |    |   |   |
|          |                        |                      |         |         | 18.500  | 6.500   | 18.5000    | 10.6881  |                                          |                         |    |    |   |   |
| SGO_1541 | -1.273                 | 6.843                | 0.0107  | 0.0508  | 15.500  | 18.000  | 16.1937    | 27.4872  | atpC; ATP synthase F1, epsilon subunit   |                         |    |    |   |   |
|          |                        |                      |         |         | 16.000  | 33.500  | 16.0000    | 55.0846  |                                          |                         |    |    |   |   |
| SGO_1542 | -1.626                 | 10.208               | 0.0000  | 0.0000  | 134.000 | 290.500 | 139.9968   | 443.6134 | atpD; ATP synthase F1, beta subunit      |                         |    |    |   |   |
|          |                        |                      |         |         | 149.500 | 273.500 | 149.5000   | 449.7204 |                                          |                         |    |    |   |   |
| SGO_1543 | -1.674                 | 7.196                | 0.0013  | 0.0029  | 17.000  | 41.500  | 17.7608    | 63.3733  | atpG; ATP synthase F1, gamma subunit     |                         |    |    |   |   |
|          |                        |                      |         |         | 17.000  | 29.500  | 17.0000    | 48.5073  |                                          |                         |    |    |   |   |
| SGO_1544 | -0.311                 | 9.368                | 0.0025  | 0.0072  | 137.500 | 125.500 | 143.6535   | 191.6471 | atpA; ATP synthase F1, alpha subunit     |                         |    |    |   |   |
|          |                        |                      |         |         | 151.000 | 106.000 | 151.0000   | 174.2975 |                                          |                         |    |    |   |   |
| SGO_1545 | -1.684                 | 7.176                | 0.0007  | 0.0008  | 16.500  | 33.000  | 17.2384    | 50.3933  | atpH; ATP synthase F1, delta subunit     |                         |    |    |   |   |
|          |                        |                      |         |         | 17.000  | 36.500  | 17.0000    | 60.0175  |                                          |                         |    |    |   |   |

Show detected proteins only  
 Show all proteins  
 Filter by category:

Proteins found: 713

**Test**      **Cutoff**  
     

| Signif | Direction | Applies To   |
|--------|-----------|--------------|
| yes    | +         | ratios, bars |
| no     | n/a       | bars         |
| yes    | -         | ratios, bars |
| yes    | +         | p-, q-Values |
| yes    | -         | p-, q-Values |

Summary Table

SgFn vs Sg

SgPg vs Sg

SgPgFn vs Sg

SgPg vs SgFn

SgPgFn vs SgFn

SgPgFn vs SgPg

Coverage

| Protein  | SgPg vs SgFn           |                      |         |         | Raw     |         | Normalized |          | Description                                                 | Log <sub>2</sub> Ratios |    |    |   |   |   |   |
|----------|------------------------|----------------------|---------|---------|---------|---------|------------|----------|-------------------------------------------------------------|-------------------------|----|----|---|---|---|---|
|          | Log <sub>2</sub> Ratio | Log <sub>2</sub> Sum | q-Value | p-Value | SgPg    | SgFn    | SgPg       | SgFn     |                                                             | -6                      | -4 | -2 | 0 | 2 | 4 | 6 |
| SGO_1546 | 0.130                  | 7.047                | 0.1240  | 0.9498  | 37.000  | 30.000  | 38.6558    | 45.8121  | atpF; ATP synthase F0, B subunit                            |                         |    |    |   |   |   |   |
|          |                        |                      |         |         | 28.000  | 12.000  | 28.0000    | 19.7318  |                                                             |                         |    |    |   |   |   |   |
| SGO_1550 | 0.224                  | 7.536                | 0.0179  | 0.1003  | 49.500  | 25.000  | 51.7152    | 38.1767  | glgP-1; glycogen phosphorylase                              |                         |    |    |   |   |   |   |
|          |                        |                      |         |         | 48.000  | 29.000  | 48.0000    | 47.6852  |                                                             |                         |    |    |   |   |   |   |
| SGO_1551 | -1.718                 | 6.594                | 0.0009  | 0.0014  | 14.000  | 25.500  | 14.6265    | 38.9402  | glgA; Glycogen synthase                                     |                         |    |    |   |   |   |   |
|          |                        |                      |         |         | 8.500   | 21.000  | 8.5000     | 34.5306  |                                                             |                         |    |    |   |   |   |   |
| SGO_1552 | -0.443                 | 7.456                | 0.0307  | 0.1890  | 47.000  | 35.500  | 49.1034    | 54.2109  | glgD; glucose-1-phosphate adenylyltransferase, GlgD subunit |                         |    |    |   |   |   |   |
|          |                        |                      |         |         | 27.000  | 27.500  | 27.0000    | 45.2187  |                                                             |                         |    |    |   |   |   |   |
| SGO_1553 | -0.465                 | 7.805                | 0.0137  | 0.0711  | 45.000  | 50.500  | 47.0139    | 77.1170  | glgC; glucose-1-phosphate adenylyltransferase               |                         |    |    |   |   |   |   |
|          |                        |                      |         |         | 46.000  | 32.500  | 46.0000    | 53.4403  |                                                             |                         |    |    |   |   |   |   |
| SGO_1554 | -1.204                 | 8.243                | 0.0008  | 0.0013  | 44.500  | 75.000  | 46.4915    | 114.5301 | glgB; 1,4-alpha-glucan branching enzyme                     |                         |    |    |   |   |   |   |
|          |                        |                      |         |         | 45.000  | 59.000  | 45.0000    | 97.0146  |                                                             |                         |    |    |   |   |   |   |
| SGO_1555 | -0.227                 | 10.842               | 0.0007  | 0.0011  | 410.000 | 329.500 | 428.3485   | 503.1690 | ptsI; phosphoenolpyruvate-protein phosphotransferase        |                         |    |    |   |   |   |   |
|          |                        |                      |         |         | 417.500 | 296.000 | 417.5000   | 486.7175 |                                                             |                         |    |    |   |   |   |   |
| SGO_1556 | -0.374                 | 11.298               | 0.0151  | 0.0799  | 455.500 | 515.500 | 475.8847   | 787.2038 | phosphocarrier protein HPr                                  |                         |    |    |   |   |   |   |
|          |                        |                      |         |         | 622.500 | 384.500 | 622.5000   | 632.2395 |                                                             |                         |    |    |   |   |   |   |
| SGO_1558 | -0.663                 | 8.459                | 0.0051  | 0.0197  | 64.500  | 81.000  | 67.3865    | 123.6925 | nrdE; ribonucleoside-diphosphate reductase large chain      |                         |    |    |   |   |   |   |
|          |                        |                      |         |         | 68.000  | 56.500  | 68.0000    | 92.9039  |                                                             |                         |    |    |   |   |   |   |
| SGO_1559 | 0.844                  | 7.748                | 0.0005  | 0.0005  | 69.000  | 24.500  | 72.0879    | 37.4132  | ribonucleoside-diphosphate reductase, beta subunit          |                         |    |    |   |   |   |   |
|          |                        |                      |         |         | 66.000  | 24.000  | 66.0000    | 39.4636  |                                                             |                         |    |    |   |   |   |   |
| SGO_1570 | 0.677                  | 8.785                | 0.0044  | 0.0160  | 139.500 | 65.000  | 145.7430   | 99.2594  | alaS; alanyl-tRNA synthetase                                |                         |    |    |   |   |   |   |
|          |                        |                      |         |         | 124.500 | 43.500  | 124.5000   | 71.5277  |                                                             |                         |    |    |   |   |   |   |
| SGO_1573 | -1.155                 | 3.882                | 0.0245  | 0.1448  | 2.500   | 5.000   | 2.6119     | 7.6353   | O-methyltransferase family protein                          |                         |    |    |   |   |   |   |
|          |                        |                      |         |         | 4.500   |         | 4.5000     |          |                                                             |                         |    |    |   |   |   |   |

- Show detected proteins only
- Show all proteins

Proteins found: 713

Filter by category:

ABC Transporter

Test

Cutoff

q-Value

.005

p-Value

| Signif | Direction | Applies To   |
|--------|-----------|--------------|
| yes    | +         | ratios, bars |
| no     | n/a       | bars         |
| yes    | -         | ratios, bars |
| yes    | +         | p-, q-Values |
| yes    | -         | p-, q-Values |

Dot Plots Dot Plots

Summary Table SgFn vs Sg SgPg vs Sg SgPgFn vs Sg SgPg vs SgFn SgPgFn vs SgFn SgPgFn vs SgPg Coverage

| Protein  | SgPg vs SgFn           |                      |         |         | Raw     |         | Normalized |          | Description                                                  | Log <sub>2</sub> Ratios |    |    |   |   |
|----------|------------------------|----------------------|---------|---------|---------|---------|------------|----------|--------------------------------------------------------------|-------------------------|----|----|---|---|
|          | Log <sub>2</sub> Ratio | Log <sub>2</sub> Sum | q-Value | p-Value | SgPg    | SgFn    | SgPg       | SgFn     |                                                              | -6                      | -4 | -2 | 0 | 2 |
| SGO_1574 | 0.417                  | 8.805                | 0.0019  | 0.0047  | 123.500 | 67.500  | 129.0269   | 103.0771 | pepF-1; oligoendopeptidase F                                 |                         |    |    |   |   |
|          |                        |                      |         |         | 126.500 | 54.000  | 126.5000   | 88.7931  |                                                              |                         |    |    |   |   |
| SGO_1580 | 1.452                  | 4.570                | 0.0007  | 0.0009  | 9.000   | 2.000   | 9.4028     | 3.0541   | PTS system, Lactose/Cellobiose specific IIB subunit          |                         |    |    |   |   |
|          |                        |                      |         |         | 8.000   | 2.000   | 8.0000     | 3.2886   |                                                              |                         |    |    |   |   |
| SGO_1587 | -0.068                 | 5.865                | 0.1190  | 0.9045  | 17.500  | 8.000   | 18.2832    | 12.2165  | queA; S-adenosylmethionine:tRNA ribosyltransferase-isomerase |                         |    |    |   |   |
|          |                        |                      |         |         | 10.500  | 10.500  | 10.5000    | 17.2653  |                                                              |                         |    |    |   |   |
| SGO_1591 | -2.605                 | 7.184                | 0.0002  | 0.0001  | 12.500  | 40.000  | 13.0594    | 61.0827  | arcC; carbamate kinase                                       |                         |    |    |   |   |
|          |                        |                      |         |         | 8.000   | 38.500  | 8.0000     | 63.3062  |                                                              |                         |    |    |   |   |
| SGO_1592 | -3.079                 | 10.535               | 0.0008  | 0.0012  | 74.500  | 379.500 | 77.8341    | 579.5225 | arcB; ornithine carbamoyltransferase                         |                         |    |    |   |   |
|          |                        |                      |         |         | 78.000  | 455.000 | 78.0000    | 748.1637 |                                                              |                         |    |    |   |   |
| SGO_1593 | -2.641                 | 9.840                | 0.0002  | 0.0001  | 58.000  | 270.000 | 60.5956    | 412.3085 | arcA; arginine deiminase                                     |                         |    |    |   |   |
|          |                        |                      |         |         | 66.000  | 229.500 | 66.0000    | 377.3705 |                                                              |                         |    |    |   |   |
| SGO_1599 | -1.637                 | 10.158               | 0.0003  | 0.0002  | 127.500 | 298.500 | 133.2059   | 455.8299 | sodA; manganese-dependent superoxide dismutase               |                         |    |    |   |   |
|          |                        |                      |         |         | 144.500 | 248.500 | 144.5000   | 408.6125 |                                                              |                         |    |    |   |   |
| SGO_1604 | -0.644                 | 4.907                | 0.0028  | 0.0085  | 6.500   | 6.000   | 6.7909     | 9.1624   | acyltransferase family protein                               |                         |    |    |   |   |
|          |                        |                      |         |         | 5.000   | 5.500   | 5.0000     | 9.0437   |                                                              |                         |    |    |   |   |
| SGO_1605 | 1.730                  | 4.362                | 0.0005  | 0.0005  | 7.000   | 1.500   | 7.3133     | 2.2906   | P-type ATPase, metal cation transport                        |                         |    |    |   |   |
|          |                        |                      |         |         | 8.500   | 1.500   | 8.5000     | 2.4665   |                                                              |                         |    |    |   |   |
| SGO_1609 | 1.437                  | 6.760                | 0.0001  | 0.0000  | 37.000  | 10.000  | 38.6558    | 15.2707  | ATP-dependent RNA helicase, DEAD/DEAH box family             |                         |    |    |   |   |
|          |                        |                      |         |         | 40.500  | 8.500   | 40.5000    | 13.9767  |                                                              |                         |    |    |   |   |
| SGO_1617 | -0.123                 | 6.060                | 0.1068  | 0.7985  | 11.000  | 9.500   | 11.4923    | 14.5072  | prfC; peptide chain release factor 3                         |                         |    |    |   |   |
|          |                        |                      |         |         | 21.000  | 12.000  | 21.0000    | 19.7318  |                                                              |                         |    |    |   |   |
| SGO_1619 | 1.170                  | 7.584                | 0.0024  | 0.0068  | 73.000  | 19.000  | 76.2669    | 29.0143  | cation-transporting ATPase, E1-E2 family                     |                         |    |    |   |   |
|          |                        |                      |         |         | 57.000  | 18.000  | 57.0000    | 29.5977  |                                                              |                         |    |    |   |   |

- Show detected proteins only
- Show all proteins

Proteins found: 713

Filter by category:  
ABC Transporter

Test Cutoff

q-Value

.005

p-Value

| Signif | Direction | Applies To   |
|--------|-----------|--------------|
| yes    | +         | ratios, bars |
| no     | n/a       | bars         |
| yes    | -         | ratios, bars |
| yes    | +         | p-, q-Values |
| yes    | -         | p-, q-Values |

Dot Plots Dot Plots

Summary Table

SgFn vs Sg

SgPg vs Sg

SgPgFn vs Sg

SgPg vs SgFn

SgPgFn vs SgFn

SgPgFn vs SgPg

Coverage

SgPg vs SgFn

Raw

Normalized

Log<sub>2</sub> Ratios

| Protein  | SgPg vs SgFn           |                      |         |         | Raw     |        | Normalized |         | Description                                                              | Log <sub>2</sub> Ratios |    |    |   |   |
|----------|------------------------|----------------------|---------|---------|---------|--------|------------|---------|--------------------------------------------------------------------------|-------------------------|----|----|---|---|
|          | Log <sub>2</sub> Ratio | Log <sub>2</sub> Sum | q-Value | p-Value | SgPg    | SgFn   | SgPg       | SgFn    |                                                                          | -6                      | -4 | -2 | 0 | 2 |
| SGO_1621 | -0.151                 | 5.237                | 0.0278  | 0.1678  | 8.000   | 6.000  | 8.3580     | 9.1624  | HD domain protein                                                        |                         |    |    |   |   |
|          |                        |                      |         |         | 9.500   | 6.500  | 9.5000     | 10.6881 |                                                                          |                         |    |    |   |   |
| SGO_1622 | -1.521                 | 5.844                | 0.0006  | 0.0006  | 7.000   | 15.000 | 7.3133     | 22.9060 | Cof family protein                                                       |                         |    |    |   |   |
|          |                        |                      |         |         | 7.500   | 12.000 | 7.5000     | 19.7318 |                                                                          |                         |    |    |   |   |
| SGO_1623 | -0.507                 | 5.952                | 0.0012  | 0.0023  | 12.500  | 12.500 | 13.0594    | 19.0884 | murM; MurM                                                               |                         |    |    |   |   |
|          |                        |                      |         |         | 12.500  | 10.500 | 12.5000    | 17.2653 |                                                                          |                         |    |    |   |   |
| SGO_1624 | -1.064                 | 5.206                | 0.0060  | 0.0240  | 6.000   | 10.000 | 6.2685     | 15.2707 | murN; MurN protein                                                       |                         |    |    |   |   |
|          |                        |                      |         |         | 5.500   | 6.000  | 5.5000     | 9.8659  |                                                                          |                         |    |    |   |   |
| SGO_1625 | -0.730                 | 7.277                | 0.0008  | 0.0013  | 29.000  | 30.000 | 30.2978    | 45.8121 | acetoin utilization putative/CBS domain protein                          |                         |    |    |   |   |
|          |                        |                      |         |         | 28.000  | 31.000 | 28.0000    | 50.9738 |                                                                          |                         |    |    |   |   |
| SGO_1626 | 1.305                  | 5.463                | 0.0170  | 0.0947  | 16.000  |        | 16.7160    |         | branched-chain amino acid ABC transporter, ATP-binding protein           |                         |    |    |   |   |
|          |                        |                      |         |         | 20.000  | 4.500  | 20.0000    | 7.3994  |                                                                          |                         |    |    |   |   |
| SGO_1630 | 2.093                  | 8.698                | 0.0000  | 0.0000  | 162.000 | 27.500 | 169.2499   | 41.9944 | branched-chain amino acid ABC transporter, amino acid-binding protein    |                         |    |    |   |   |
|          |                        |                      |         |         | 167.000 | 22.500 | 167.0000   | 36.9971 |                                                                          |                         |    |    |   |   |
| SGO_1632 | -1.451                 | 7.500                | 0.0023  | 0.0064  | 22.500  | 36.500 | 23.5069    | 55.7380 | clpP; ATP-dependent Clp protease, proteolytic subunit ClpP               |                         |    |    |   |   |
|          |                        |                      |         |         | 24.500  | 47.000 | 24.5000    | 77.2828 |                                                                          |                         |    |    |   |   |
| SGO_1633 | -0.346                 | 8.175                | 0.0121  | 0.0602  | 60.000  | 60.000 | 62.6851    | 91.6241 | upp; uracil phosphoribosyltransferase                                    |                         |    |    |   |   |
|          |                        |                      |         |         | 64.000  | 43.000 | 64.0000    | 70.7056 |                                                                          |                         |    |    |   |   |
| SGO_1634 | -0.133                 | 4.535                | 0.1063  | 0.7935  | 7.000   | 4.000  | 7.3133     | 6.1083  | magnesium-translocating P-type ATPase                                    |                         |    |    |   |   |
|          |                        |                      |         |         | 4.000   | 3.500  | 4.0000     | 5.7551  |                                                                          |                         |    |    |   |   |
| SGO_1638 | -0.488                 | 5.348                | 0.0125  | 0.0623  | 7.500   | 6.500  | 7.8356     | 9.9259  | murE; UDP-N-acetylmuramoylalanyl-D-glutamate--2,6-diaminopimelate ligase |                         |    |    |   |   |
|          |                        |                      |         |         | 9.000   | 8.500  | 9.0000     | 13.9767 |                                                                          |                         |    |    |   |   |
| SGO_1648 | 0.636                  | 8.950                | 0.0052  | 0.0203  | 124.500 | 62.000 | 130.0717   | 94.6782 | ppx1; inorganic pyrophosphatase, manganese-dependent                     |                         |    |    |   |   |
|          |                        |                      |         |         | 172.000 | 59.500 | 172.0000   | 97.8368 |                                                                          |                         |    |    |   |   |

 Show detected proteins only Show all proteinsProteins found:  
713 Filter by category:

ABC Transporter

Test

Cutoff

q-Value

.005

p-Value

|             | Signif | Direction | Applies To   |
|-------------|--------|-----------|--------------|
| Red         | yes    | +         | ratios, bars |
| Yellow      | no     | n/a       | bars         |
| Green       | yes    | -         | ratios, bars |
| Pink        | yes    | +         | p-, q-Values |
| Light Green | yes    | -         | p-, q-Values |

Dot Plots Dot Plots

Summary Table

SgFn vs Sg

SgPg vs Sg

SgPgFn vs Sg

SgPg vs SgFn

SgPgFn vs SgFn

SgPgFn vs SgPg

Coverage

SgPg vs SgFn

Raw

Normalized

Log<sub>2</sub> Ratios

| Protein  | SgPg vs SgFn           |                      |         |         | Raw     |        | Normalized |         | Description                                                | Log <sub>2</sub> Ratios |    |    |   |   |
|----------|------------------------|----------------------|---------|---------|---------|--------|------------|---------|------------------------------------------------------------|-------------------------|----|----|---|---|
|          | Log <sub>2</sub> Ratio | Log <sub>2</sub> Sum | q-Value | p-Value | SgPg    | SgFn   | SgPg       | SgFn    |                                                            | -6                      | -4 | -2 | 0 | 2 |
| SGO_1649 | -1.939                 | 5.143                | 0.0006  | 0.0007  | 2.500   | 9.000  | 2.6119     | 13.7436 | act; pyruvate formate-lyase-activating enzyme              |                         |    |    |   |   |
|          |                        |                      |         |         | 5.000   | 8.500  | 5.0000     | 13.9767 |                                                            |                         |    |    |   |   |
| SGO_1652 | 1.008                  | 6.371                | 0.0005  | 0.0005  | 26.500  | 10.000 | 27.6859    | 15.2707 | intracellular glycosyl hydrolase                           |                         |    |    |   |   |
|          |                        |                      |         |         | 27.500  | 7.500  | 27.5000    | 12.3324 |                                                            |                         |    |    |   |   |
| SGO_1653 | 0.013                  | 7.115                | 0.1226  | 0.9373  | 32.500  | 20.500 | 33.9545    | 31.3049 | trehalose PTS enzyme II                                    |                         |    |    |   |   |
|          |                        |                      |         |         | 35.500  | 23.000 | 35.5000    | 37.8193 |                                                            |                         |    |    |   |   |
| SGO_1655 | -0.821                 | 4.901                | 0.0162  | 0.0886  | 4.000   | 4.500  | 4.1790     | 6.8718  | CBS domain protein/possible hemolysin                      |                         |    |    |   |   |
|          |                        |                      |         |         | 6.500   | 7.500  | 6.5000     | 12.3324 |                                                            |                         |    |    |   |   |
| SGO_1666 | -1.754                 | 7.016                | 0.0001  | 0.0000  | 15.500  | 33.000 | 16.1937    | 50.3933 | trkA; potassium uptake protein, Trk family                 |                         |    |    |   |   |
|          |                        |                      |         |         | 13.500  | 30.000 | 13.5000    | 49.3295 |                                                            |                         |    |    |   |   |
| SGO_1669 | 0.160                  | 6.308                | 0.0762  | 0.5497  | 22.500  | 15.000 | 23.5069    | 22.9060 | ribosomal large subunit pseudouridine synthase B           |                         |    |    |   |   |
|          |                        |                      |         |         | 18.000  | 9.000  | 18.0000    | 14.7988 |                                                            |                         |    |    |   |   |
| SGO_1674 | -0.983                 | 5.062                | 0.0007  | 0.0010  | 6.000   | 7.500  | 6.2685     | 11.4530 | phosphodiesterase, MJ0936 family                           |                         |    |    |   |   |
|          |                        |                      |         |         | 5.000   | 6.500  | 5.0000     | 10.6881 |                                                            |                         |    |    |   |   |
| SGO_1675 | -0.908                 | 5.903                | 0.0027  | 0.0079  | 8.500   | 11.500 | 8.8804     | 17.5613 | HAM1 protein-like protein                                  |                         |    |    |   |   |
|          |                        |                      |         |         | 12.000  | 13.000 | 12.0000    | 21.3761 |                                                            |                         |    |    |   |   |
| SGO_1676 | 0.694                  | 5.633                | 0.0003  | 0.0002  | 14.500  | 6.500  | 15.1489    | 9.9259  | murI; glutamate racemase                                   |                         |    |    |   |   |
|          |                        |                      |         |         | 15.500  | 5.500  | 15.5000    | 9.0437  |                                                            |                         |    |    |   |   |
| SGO_1678 | -1.251                 | 5.548                | 0.0083  | 0.0379  | 10.500  | 9.000  | 10.9699    | 13.7436 | lysA; diaminopimelate decarboxylase                        |                         |    |    |   |   |
|          |                        |                      |         |         | 4.000   | 11.000 | 4.0000     | 18.0875 |                                                            |                         |    |    |   |   |
| SGO_1679 | 1.095                  | 9.069                | 0.0023  | 0.0062  | 198.000 | 60.000 | 206.8610   | 91.6241 | phosphotransferase system enzyme II                        |                         |    |    |   |   |
|          |                        |                      |         |         | 159.500 | 48.000 | 159.5000   | 78.9272 |                                                            |                         |    |    |   |   |
| SGO_1681 | 0.852                  | 8.227                | 0.0011  | 0.0020  | 93.000  | 30.500 | 97.1620    | 46.5756 | PTS system, mannose/fructose/sorbose family, IID component |                         |    |    |   |   |
|          |                        |                      |         |         | 95.000  | 37.000 | 95.0000    | 60.8397 |                                                            |                         |    |    |   |   |

- Show detected proteins only  
 Show all proteins

Proteins found:  
713

Filter by category:

ABC Transporter

Test

Cutoff

q-Value

.005

p-Value

|             | Signif | Direction | Applies To   |
|-------------|--------|-----------|--------------|
| Red         | yes    | +         | ratios, bars |
| Yellow      | no     | n/a       | bars         |
| Green       | yes    | -         | ratios, bars |
| Pink        | yes    | +         | p-, q-Values |
| Light Green | yes    | -         | p-, q-Values |

Dot Plots Dot Plots

Summary Table

SgFn vs Sg

SgPg vs Sg

SgPgFn vs Sg

SgPg vs SgFn

SgPgFn vs SgFn

SgPgFn vs SgPg

Coverage

| Protein  | SgPg vs SgFn           |                      |         |         | Raw     |         | Normalized |          | Description                                                       | Log <sub>2</sub> Ratios |    |    |   |   |   |   |
|----------|------------------------|----------------------|---------|---------|---------|---------|------------|----------|-------------------------------------------------------------------|-------------------------|----|----|---|---|---|---|
|          | Log <sub>2</sub> Ratio | Log <sub>2</sub> Sum | q-Value | p-Value | SgPg    | SgFn    | SgPg       | SgFn     |                                                                   | -6                      | -4 | -2 | 0 | 2 | 4 | 6 |
| SGO_1683 | 0.380                  | 7.907                | 0.0346  | 0.2185  | 67.000  | 44.500  | 69.9984    | 67.9545  | serS; seryl-tRNA synthetase                                       |                         |    |    |   |   |   |   |
|          |                        |                      |         |         | 63.500  | 23.500  | 63.5000    | 38.6414  |                                                                   |                         |    |    |   |   |   |   |
| SGO_1685 | 1.647                  | 7.820                | 0.0001  | 0.0000  | 84.000  | 17.500  | 87.7592    | 26.7237  | putative peroxidase / antioxidant                                 |                         |    |    |   |   |   |   |
|          |                        |                      |         |         | 83.500  | 17.000  | 83.5000    | 27.9534  |                                                                   |                         |    |    |   |   |   |   |
| SGO_1687 | 0.295                  | 7.374                | 0.0188  | 0.1060  | 46.500  | 28.000  | 48.5810    | 42.7579  | accA; acetyl-CoA carboxylase, carboxyl transferase, alpha subunit |                         |    |    |   |   |   |   |
|          |                        |                      |         |         | 42.500  | 19.500  | 42.5000    | 32.0642  |                                                                   |                         |    |    |   |   |   |   |
| SGO_1688 | -0.504                 | 6.188                | 0.0000  | 0.0000  | 14.500  | 14.000  | 15.1489    | 21.3790  | accD; acetyl-CoA carboxylase, carboxyl transferase, beta subunit  |                         |    |    |   |   |   |   |
|          |                        |                      |         |         | 15.000  | 13.000  | 15.0000    | 21.3761  |                                                                   |                         |    |    |   |   |   |   |
| SGO_1689 | -0.538                 | 7.735                | 0.0021  | 0.0051  | 40.000  | 38.500  | 41.7901    | 58.7921  | accC; acetyl-CoA carboxylase, biotin carboxylase                  |                         |    |    |   |   |   |   |
|          |                        |                      |         |         | 45.000  | 41.000  | 45.0000    | 67.4170  |                                                                   |                         |    |    |   |   |   |   |
| SGO_1690 | 0.686                  | 6.080                | 0.0188  | 0.1070  | 16.000  | 6.000   | 16.7160    | 9.1624   | fabZ; beta-hydroxyacyl-(acyl-carrier-protein) dehydratase FabZ    |                         |    |    |   |   |   |   |
|          |                        |                      |         |         | 24.500  | 10.500  | 24.5000    | 17.2653  |                                                                   |                         |    |    |   |   |   |   |
| SGO_1691 | 1.481                  | 7.734                | 0.0013  | 0.0027  | 77.500  | 24.500  | 80.9683    | 37.4132  | accB; acetyl-CoA carboxylase, biotin carboxyl carrier protein     |                         |    |    |   |   |   |   |
|          |                        |                      |         |         | 74.000  | 12.500  | 74.0000    | 20.5539  |                                                                   |                         |    |    |   |   |   |   |
| SGO_1692 | -0.657                 | 10.055               | 0.0015  | 0.0034  | 196.000 | 197.500 | 204.7715   | 301.5960 | 3-oxoacyl-[acyl-carrier-protein] synthase                         |                         |    |    |   |   |   |   |
|          |                        |                      |         |         | 207.500 | 213.000 | 207.5000   | 350.2393 |                                                                   |                         |    |    |   |   |   |   |
| SGO_1693 | -0.282                 | 7.146                | 0.0033  | 0.0107  | 32.500  | 25.000  | 33.9545    | 38.1767  | fabG; 3-oxoacyl-(acyl-carrier-protein) reductase                  |                         |    |    |   |   |   |   |
|          |                        |                      |         |         | 30.000  | 24.000  | 30.0000    | 39.4636  |                                                                   |                         |    |    |   |   |   |   |
| SGO_1694 | 0.671                  | 6.845                | 0.0067  | 0.0276  | 30.000  | 12.000  | 31.3426    | 18.3248  | fabD; malonyl CoA-acyl carrier protein transacylase               |                         |    |    |   |   |   |   |
|          |                        |                      |         |         | 39.000  | 16.000  | 39.0000    | 26.3091  |                                                                   |                         |    |    |   |   |   |   |
| SGO_1695 | 0.782                  | 9.289                | 0.0030  | 0.0092  | 212.000 | 71.000  | 221.4875   | 108.4219 | enoyl-acyl carrier protein(ACP) reductase                         |                         |    |    |   |   |   |   |
|          |                        |                      |         |         | 175.000 | 73.500  | 175.0000   | 120.8572 |                                                                   |                         |    |    |   |   |   |   |
| SGO_1699 | -0.547                 | 5.849                | 0.0043  | 0.0152  | 13.000  | 11.000  | 13.5818    | 16.7978  | transcriptional regulator, MarR family                            |                         |    |    |   |   |   |   |
|          |                        |                      |         |         | 10.000  | 10.500  | 10.0000    | 17.2653  |                                                                   |                         |    |    |   |   |   |   |

- Show detected proteins only
- Show all proteins

Proteins found: 713

Filter by category:

ABC Transporter

Test

Cutoff

q-Value

.005

p-Value

|             | Signif | Direction | Applies To   |
|-------------|--------|-----------|--------------|
| Red         | yes    | +         | ratios, bars |
| Yellow      | no     | n/a       | bars         |
| Green       | yes    | -         | ratios, bars |
| Pink        | yes    | +         | p-, q-Values |
| Light Green | yes    | -         | p-, q-Values |

Dot Plots Dot Plots



Summary Table SgFn vs Sg SgPg vs Sg SgPgFn vs Sg SgPg vs SgFn SgPgFn vs SgFn SgPgFn vs SgPg Coverage

| Protein  | SgPg vs SgFn           |                      |         |         | Raw     |         | Normalized |          | Description                                           | Log <sub>2</sub> Ratios |    |    |   |   |
|----------|------------------------|----------------------|---------|---------|---------|---------|------------|----------|-------------------------------------------------------|-------------------------|----|----|---|---|
|          | Log <sub>2</sub> Ratio | Log <sub>2</sub> Sum | q-Value | p-Value | SgPg    | SgFn    | SgPg       | SgFn     |                                                       | -6                      | -4 | -2 | 0 | 2 |
| SGO_1700 | -2.813                 | 7.773                | 0.0007  | 0.0010  | 13.500  | 55.500  | 14.1042    | 84.7523  | enoyl-CoA hydratase/isomerase family protein          |                         |    |    |   |   |
|          |                        |                      |         |         | 13.000  | 65.000  | 13.0000    | 106.8805 |                                                       |                         |    |    |   |   |
| SGO_1701 | 0.028                  | 7.657                | 0.1026  | 0.7627  | 49.000  | 30.000  | 51.1929    | 45.8121  | aspartate kinase                                      |                         |    |    |   |   |
|          |                        |                      |         |         | 50.500  | 33.000  | 50.5000    | 54.2624  |                                                       |                         |    |    |   |   |
| SGO_1708 | 0.630                  | 8.003                | 0.0022  | 0.0059  | 70.500  | 36.500  | 73.6550    | 55.7380  | amiF; Oligopeptide transport ATP-binding protein amiF |                         |    |    |   |   |
|          |                        |                      |         |         | 82.000  | 27.500  | 82.0000    | 45.2187  |                                                       |                         |    |    |   |   |
| SGO_1709 | 1.471                  | 7.990                | 0.0006  | 0.0007  | 83.500  | 20.000  | 87.2368    | 30.5414  | amiE; Oligopeptide transport ATP-binding protein      |                         |    |    |   |   |
|          |                        |                      |         |         | 99.500  | 22.500  | 99.5000    | 36.9971  |                                                       |                         |    |    |   |   |
| SGO_1711 | 1.224                  | 6.684                | 0.0002  | 0.0001  | 33.500  | 10.500  | 34.9992    | 16.0342  | hppB; Oligopeptide transport system permease          |                         |    |    |   |   |
|          |                        |                      |         |         | 37.000  | 9.000   | 37.0000    | 14.7988  |                                                       |                         |    |    |   |   |
| SGO_1712 | 0.912                  | 9.612                | 0.0027  | 0.0079  | 243.000 | 111.000 | 253.8748   | 169.5046 | hppA; oligopeptide-binding lipoprotein                |                         |    |    |   |   |
|          |                        |                      |         |         | 252.500 | 65.000  | 252.5000   | 106.8805 |                                                       |                         |    |    |   |   |
| SGO_1713 | -0.172                 | 9.436                | 0.0368  | 0.2370  | 160.000 | 137.500 | 167.1604   | 209.9719 | hppG; oligopeptide-binding lipoprotein                |                         |    |    |   |   |
|          |                        |                      |         |         | 157.000 | 96.500  | 157.0000   | 158.6765 |                                                       |                         |    |    |   |   |
| SGO_1715 | -0.060                 | 8.185                | 0.0447  | 0.2998  | 66.000  | 51.000  | 68.9537    | 77.8805  | hppH; oligopeptide-binding lipoprotein                |                         |    |    |   |   |
|          |                        |                      |         |         | 73.500  | 43.000  | 73.5000    | 70.7056  |                                                       |                         |    |    |   |   |
| SGO_1716 | -0.045                 | 8.522                | 0.0912  | 0.6716  | 90.000  | 70.000  | 94.0277    | 106.8948 | oligopeptide binding protein                          |                         |    |    |   |   |
|          |                        |                      |         |         | 86.000  | 49.000  | 86.0000    | 80.5715  |                                                       |                         |    |    |   |   |
| SGO_1717 | -1.505                 | 3.809                | 0.0180  | 0.1005  | 2.000   | 3.500   | 2.0895     | 5.3447   | pbp3; penicillin-binding protein 3                    |                         |    |    |   |   |
|          |                        |                      |         |         |         | 4.000   |            | 6.5773   |                                                       |                         |    |    |   |   |
| SGO_1718 | 0.568                  | 6.721                | 0.0097  | 0.0454  | 31.500  | 11.000  | 32.9097    | 16.7978  | sufB-1; FeS assembly protein SufB                     |                         |    |    |   |   |
|          |                        |                      |         |         | 29.500  | 16.000  | 29.5000    | 26.3091  |                                                       |                         |    |    |   |   |
| SGO_1721 | 0.197                  | 7.090                | 0.0384  | 0.2496  | 32.500  | 24.000  | 33.9545    | 36.6496  | sufD; FeS assembly protein SufD                       |                         |    |    |   |   |
|          |                        |                      |         |         | 38.500  | 16.500  | 38.5000    | 27.1312  |                                                       |                         |    |    |   |   |

Show detected proteins only  
 Show all proteins  
 Filter by category:

Proteins found: 713

**Test**      **Cutoff**  
     

| Signif | Direction | Applies To   |
|--------|-----------|--------------|
| yes    | +         | ratios, bars |
| no     | n/a       | bars         |
| yes    | -         | ratios, bars |
| yes    | +         | p-, q-Values |
| yes    | -         | p-, q-Values |

[Dot Plots](#)

Summary Table

SgFn vs Sg

SgPg vs Sg

SgPgFn vs Sg

SgPg vs SgFn

SgPgFn vs SgFn

SgPgFn vs SgPg

Coverage

SgPg vs SgFn

Raw

Normalized

Log<sub>2</sub> Ratios

| Protein  | SgPg vs SgFn           |                      |         |         | Raw      |         | Normalized |          | Description                                                     | Log <sub>2</sub> Ratios |    |    |   |   |
|----------|------------------------|----------------------|---------|---------|----------|---------|------------|----------|-----------------------------------------------------------------|-------------------------|----|----|---|---|
|          | Log <sub>2</sub> Ratio | Log <sub>2</sub> Sum | q-Value | p-Value | SgPg     | SgFn    | SgPg       | SgFn     |                                                                 | -6                      | -4 | -2 | 0 | 2 |
| SGO_1722 | -0.285                 | 6.570                | 0.0075  | 0.0318  | 19.000   | 18.000  | 19.8503    | 27.4872  | sufC; FeS assembly ATPase SufC                                  |                         |    |    |   |   |
|          |                        |                      |         |         | 23.000   | 15.000  | 23.0000    | 24.6647  |                                                                 |                         |    |    |   |   |
| SGO_1724 | -0.717                 | 2.988                |         |         |          |         |            |          | mecA; Adapter protein mec                                       |                         |    |    |   |   |
|          |                        |                      |         |         | 3.000    | 3.000   | 3.0000     | 4.9329   |                                                                 |                         |    |    |   |   |
| SGO_1727 | 0.773                  | 6.329                | 0.0041  | 0.0141  | 22.000   | 11.500  | 22.9846    | 17.5613  | amino acid ABC transporter, amino acid-binding/permease protein |                         |    |    |   |   |
|          |                        |                      |         |         | 27.500   | 7.500   | 27.5000    | 12.3324  |                                                                 |                         |    |    |   |   |
| SGO_1728 | -0.625                 | 6.253                | 0.0044  | 0.0160  | 17.000   | 14.500  | 17.7608    | 22.1425  | glnQ; glutamine ABC transporter ATP-binding protein             |                         |    |    |   |   |
|          |                        |                      |         |         | 12.500   | 14.500  | 12.5000    | 23.8426  |                                                                 |                         |    |    |   |   |
| SGO_1729 | -2.961                 | 8.759                | 0.0025  | 0.0072  | 20.500   | 97.000  | 21.4174    | 148.1256 | hypothetical protein SGO_1729                                   |                         |    |    |   |   |
|          |                        |                      |         |         | 27.000   | 144.000 | 27.0000    | 236.7815 |                                                                 |                         |    |    |   |   |
| SGO_1730 | -1.547                 | 9.192                | 0.0021  | 0.0053  | 60.500   | 163.500 | 63.2075    | 249.6757 | SPFH domain/Band 7 family                                       |                         |    |    |   |   |
|          |                        |                      |         |         | 86.000   | 113.000 | 86.0000    | 185.8077 |                                                                 |                         |    |    |   |   |
| SGO_1731 | 2.314                  | 5.420                | 0.0013  | 0.0029  | 14.500   | 2.000   | 15.1489    | 3.0541   | DNA-binding response regulator                                  |                         |    |    |   |   |
|          |                        |                      |         |         | 20.500   | 2.500   | 20.5000    | 4.1108   |                                                                 |                         |    |    |   |   |
| SGO_1735 | 0.211                  | 8.904                | 0.0244  | 0.1434  | 123.500  | 82.500  | 129.0269   | 125.9831 | hypothetical protein SGO_1735                                   |                         |    |    |   |   |
|          |                        |                      |         |         | 127.000  | 59.000  | 127.0000   | 97.0146  |                                                                 |                         |    |    |   |   |
| SGO_1736 | -0.273                 | 6.124                | 0.0440  | 0.2941  | 17.000   | 15.500  | 17.7608    | 23.6696  | alkaline shock protein                                          |                         |    |    |   |   |
|          |                        |                      |         |         | 13.500   | 9.000   | 13.5000    | 14.7988  |                                                                 |                         |    |    |   |   |
| SGO_1745 | 0.915                  | 11.782               | 0.0003  | 0.0002  | 1075.000 | 422.000 | 1123.1089  | 644.4229 | fba; fructose-1,6-bisphosphate aldolase, class II               |                         |    |    |   |   |
|          |                        |                      |         |         | 1177.500 | 351.000 | 1177.5000  | 577.1549 |                                                                 |                         |    |    |   |   |
| SGO_1747 | -1.902                 | 3.525                | 0.0129  | 0.0660  | 2.500    |         | 2.6119     |          | hypothetical protein SGO_1747                                   |                         |    |    |   |   |
|          |                        |                      |         |         | 1.500    | 4.500   | 1.5000     | 7.3994   |                                                                 |                         |    |    |   |   |
| SGO_1748 | 1.153                  | 5.008                | 0.0403  | 0.2643  | 9.500    |         | 9.9251     |          | pyrG; CTP synthase                                              |                         |    |    |   |   |
|          |                        |                      |         |         | 16.500   | 3.500   | 16.5000    | 5.7551   |                                                                 |                         |    |    |   |   |

 Show detected proteins only Show all proteinsProteins found:  
713 Filter by category:

ABC Transporter

Test

Cutoff

q-Value

.005

p-Value

|             | Signif | Direction | Applies To   |
|-------------|--------|-----------|--------------|
| Red         | yes    | +         | ratios, bars |
| Yellow      | no     | n/a       | bars         |
| Green       | yes    | -         | ratios, bars |
| Pink        | yes    | +         | p-, q-Values |
| Light Green | yes    | -         | p-, q-Values |

Dot Plots Dot Plots

Summary Table

SgFn vs Sg

SgPg vs Sg

SgPgFn vs Sg

SgPg vs SgFn

SgPgFn vs SgFn

SgPgFn vs SgPg

Coverage

| Protein  | SgPg vs SgFn           |                      |         |         | Raw     |         | Normalized |          | Description                                                   | Log <sub>2</sub> Ratios |    |    |   |   |
|----------|------------------------|----------------------|---------|---------|---------|---------|------------|----------|---------------------------------------------------------------|-------------------------|----|----|---|---|
|          | Log <sub>2</sub> Ratio | Log <sub>2</sub> Sum | q-Value | p-Value | SgPg    | SgFn    | SgPg       | SgFn     |                                                               | -6                      | -4 | -2 | 0 | 2 |
| SGO_1749 | 0.024                  | 6.688                | 0.1201  | 0.9143  | 21.000  | 19.500  | 21.9398    | 29.7778  | manA; mannose-6-phosphate isomerase, class I                  |                         |    |    |   |   |
|          |                        |                      |         |         | 30.000  | 13.000  | 30.0000    | 21.3761  |                                                               |                         |    |    |   |   |
| SGO_1755 | 1.873                  | 6.648                | 0.0011  | 0.0021  | 42.500  | 7.000   | 44.4020    | 10.6895  | scrK; fructokinase                                            |                         |    |    |   |   |
|          |                        |                      |         |         | 34.500  | 6.500   | 34.5000    | 10.6881  |                                                               |                         |    |    |   |   |
| SGO_1757 | 0.959                  | 8.074                | 0.0028  | 0.0085  | 82.000  | 38.000  | 85.6697    | 58.0286  | glmS; glucosamine--fructose-6-phosphate aminotransferase      |                         |    |    |   |   |
|          |                        |                      |         |         | 90.500  | 21.500  | 90.5000    | 35.3528  |                                                               |                         |    |    |   |   |
| SGO_1760 | -1.133                 | 3.260                |         |         |         |         |            |          | DNA-binding response regulator                                |                         |    |    |   |   |
|          |                        |                      |         |         | 3.000   | 4.000   | 3.0000     | 6.5773   |                                                               |                         |    |    |   |   |
| SGO_1763 | 0.588                  | 7.148                | 0.0069  | 0.0284  | 36.000  | 21.000  | 37.6111    | 32.0684  | ABC transporter, substrate-binding protein SP0092             |                         |    |    |   |   |
|          |                        |                      |         |         | 47.500  | 15.000  | 47.5000    | 24.6647  |                                                               |                         |    |    |   |   |
| SGO_1768 | -2.439                 | 5.865                | 0.0010  | 0.0018  | 2.500   | 17.000  | 2.6119     | 25.9602  | glycosyl hydrolase, family 38                                 |                         |    |    |   |   |
|          |                        |                      |         |         | 7.500   | 13.500  | 7.5000     | 22.1983  |                                                               |                         |    |    |   |   |
| SGO_1774 | -1.588                 | 6.190                | 0.0005  | 0.0006  | 10.500  | 18.500  | 10.9699    | 28.2508  | alcohol dehydrogenase, zinc-containing                        |                         |    |    |   |   |
|          |                        |                      |         |         | 7.500   | 16.000  | 7.5000     | 26.3091  |                                                               |                         |    |    |   |   |
| SGO_1784 | 0.233                  | 8.016                | 0.0129  | 0.0663  | 70.000  | 42.500  | 73.1327    | 64.9004  | leuS; leucyl-tRNA synthetase                                  |                         |    |    |   |   |
|          |                        |                      |         |         | 66.500  | 33.000  | 66.5000    | 54.2624  |                                                               |                         |    |    |   |   |
| SGO_1799 | -1.037                 | 9.053                | 0.0001  | 0.0000  | 80.500  | 117.500 | 84.1026    | 179.4305 | endopeptidase O                                               |                         |    |    |   |   |
|          |                        |                      |         |         | 90.000  | 108.000 | 90.0000    | 177.5861 |                                                               |                         |    |    |   |   |
| SGO_1802 | 3.394                  | 7.883                | 0.0013  | 0.0025  | 119.500 | 9.000   | 124.8479   | 13.7436  | Metal ABC transporter substrate-binding lipoprotein precursor |                         |    |    |   |   |
|          |                        |                      |         |         | 90.000  | 4.500   | 90.0000    | 7.3994   |                                                               |                         |    |    |   |   |
| SGO_1803 | 0.481                  | 6.697                | 0.0022  | 0.0059  | 29.500  | 15.500  | 30.8202    | 23.6696  | tpx; thioredoxin peroxidase                                   |                         |    |    |   |   |
|          |                        |                      |         |         | 29.500  | 12.000  | 29.5000    | 19.7318  |                                                               |                         |    |    |   |   |
| SGO_1804 | 1.136                  | 5.246                | 0.0003  | 0.0002  | 13.000  | 4.000   | 13.5818    | 6.1083   | hutI; imidazolonepropionase                                   |                         |    |    |   |   |
|          |                        |                      |         |         | 12.500  | 3.500   | 12.5000    | 5.7551   |                                                               |                         |    |    |   |   |

- Show detected proteins only
- Show all proteins

Proteins found: 713

Filter by category:  
ABC Transporter

Test

Cutoff

q-Value

.005

p-Value

|             | Signif | Direction | Applies To   |
|-------------|--------|-----------|--------------|
| Red         | yes    | +         | ratios, bars |
| Yellow      | no     | n/a       | bars         |
| Green       | yes    | -         | ratios, bars |
| Pink        | yes    | +         | p-, q-Values |
| Light Green | yes    | -         | p-, q-Values |

Dot Plots Dot Plots

Summary Table

SgFn vs Sg

SgPg vs Sg

SgPgFn vs Sg

SgPg vs SgFn

SgPgFn vs SgFn

SgPgFn vs SgPg

Coverage

| Protein  | SgPg vs SgFn           |                      |         |         | Raw    |         | Normalized |          | Description                                        | Log <sub>2</sub> Ratios |    |    |   |   |
|----------|------------------------|----------------------|---------|---------|--------|---------|------------|----------|----------------------------------------------------|-------------------------|----|----|---|---|
|          | Log <sub>2</sub> Ratio | Log <sub>2</sub> Sum | q-Value | p-Value | SgPg   | SgFn    | SgPg       | SgFn     |                                                    | -6                      | -4 | -2 | 0 | 2 |
| SGO_1805 | 3.863                  | 6.129                | 0.0204  | 0.1167  | 38.000 | 1.500   | 39.7006    | 2.2906   | hutU; urocanate hydratase                          |                         |    |    |   |   |
|          |                        |                      |         |         | 28.000 |         | 28.0000    |          |                                                    |                         |    |    |   |   |
| SGO_1808 | -1.367                 | 4.133                | 0.0081  | 0.0358  | 4.000  |         | 4.1790     |          | fhs-2; formate--tetrahydrofolate ligase            |                         |    |    |   |   |
|          |                        |                      |         |         | 3.500  | 6.000   | 3.5000     | 9.8659   |                                                    |                         |    |    |   |   |
| SGO_1811 | -0.540                 | 4.773                | 0.0042  | 0.0146  | 7.500  |         | 7.8356     |          | hutH; histidine ammonia-lyase                      |                         |    |    |   |   |
|          |                        |                      |         |         | 8.000  | 7.000   | 8.0000     | 11.5102  |                                                    |                         |    |    |   |   |
| SGO_1816 | -0.731                 | 5.031                | 0.0357  | 0.2282  |        | 9.500   |            | 14.5072  | scaR; ScaR Manganese-dependent regulator of scaCBA |                         |    |    |   |   |
|          |                        |                      |         |         | 7.500  | 6.500   | 7.5000     | 10.6881  |                                                    |                         |    |    |   |   |
| SGO_1822 | -1.893                 | 6.278                | 0.0011  | 0.0022  | 8.000  | 17.500  | 8.3580     | 26.7237  | relA; GTP diphosphokinase                          |                         |    |    |   |   |
|          |                        |                      |         |         | 8.000  | 21.000  | 8.0000     | 34.5306  |                                                    |                         |    |    |   |   |
| SGO_1824 | 0.331                  | 5.742                | 0.0167  | 0.0927  | 14.000 | 6.500   | 14.6265    | 9.9259   | prmA; ribosomal protein L11 methyltransferase      |                         |    |    |   |   |
|          |                        |                      |         |         | 15.000 | 8.500   | 15.0000    | 13.9767  |                                                    |                         |    |    |   |   |
| SGO_1827 | -1.094                 | 4.383                | 0.0183  | 0.1026  | 4.000  | 7.000   | 4.1790     | 10.6895  | hypothetical protein SGO_1827                      |                         |    |    |   |   |
|          |                        |                      |         |         | 6.000  |         | 6.0000     |          |                                                    |                         |    |    |   |   |
| SGO_1828 | -0.938                 | 4.525                | 0.0147  | 0.0777  | 2.500  | 6.000   | 2.6119     | 9.1624   | ATPase, AAA family                                 |                         |    |    |   |   |
|          |                        |                      |         |         | 5.500  | 3.500   | 5.5000     | 5.7551   |                                                    |                         |    |    |   |   |
| SGO_1834 | -2.439                 | 8.524                | 0.0013  | 0.0027  | 35.500 | 116.000 | 37.0887    | 177.1399 | hypothetical protein SGO_1834                      |                         |    |    |   |   |
|          |                        |                      |         |         | 21.500 | 80.500  | 21.5000    | 132.3674 |                                                    |                         |    |    |   |   |
| SGO_1835 | -1.923                 | 4.470                | 0.0032  | 0.0102  | 3.500  | 9.500   | 3.6566     | 14.5072  | hypothetical protein SGO_1835                      |                         |    |    |   |   |
|          |                        |                      |         |         | 4.000  |         | 4.0000     |          |                                                    |                         |    |    |   |   |
| SGO_1843 | -0.001                 | 7.961                | 0.1224  | 0.9344  | 67.000 | 41.500  | 69.9984    | 63.3733  | pepS; aminopeptidase PepS                          |                         |    |    |   |   |
|          |                        |                      |         |         | 55.000 | 37.000  | 55.0000    | 60.8397  |                                                    |                         |    |    |   |   |
| SGO_1844 | 0.408                  | 5.399                | 0.0074  | 0.0314  | 12.500 | 6.500   | 13.0594    | 9.9259   | cbxX/cfqX family protein                           |                         |    |    |   |   |
|          |                        |                      |         |         | 11.000 | 5.000   | 11.0000    | 8.2216   |                                                    |                         |    |    |   |   |

Show detected proteins only  
 Show all proteins  
 Filter by category:

Proteins found: 713

**Test**      **Cutoff**  
     

|             | Signif | Direction | Applies To   |
|-------------|--------|-----------|--------------|
| Red         | yes    | +         | ratios, bars |
| Yellow      | no     | n/a       | bars         |
| Green       | yes    | -         | ratios, bars |
| Pink        | yes    | +         | p-, q-Values |
| Light Green | yes    | -         | p-, q-Values |

Summary Table

SgFn vs Sg

SgPg vs Sg

SgPgFn vs Sg

SgPg vs SgFn

SgPgFn vs SgFn

SgPgFn vs SgPg

Coverage

SgPg vs SgFn

Raw

Normalized

Log<sub>2</sub> Ratios

| Protein  | SgPg vs SgFn           |                      |         |         | Raw    |         | Normalized |          | Description                                                 | Log <sub>2</sub> Ratios |    |    |   |   |   |   |
|----------|------------------------|----------------------|---------|---------|--------|---------|------------|----------|-------------------------------------------------------------|-------------------------|----|----|---|---|---|---|
|          | Log <sub>2</sub> Ratio | Log <sub>2</sub> Sum | q-Value | p-Value | SgPg   | SgFn    | SgPg       | SgFn     |                                                             | -6                      | -4 | -2 | 0 | 2 | 4 | 6 |
| SGO_1847 | -0.370                 | 5.761                | 0.0377  | 0.2442  | 10.500 | 7.000   | 10.9699    | 10.6895  | polC; DNA polymerase III, alpha subunit, Gram-positive type |                         |    |    |   |   |   |   |
|          |                        |                      |         |         | 12.000 | 12.500  | 12.0000    | 20.5539  |                                                             |                         |    |    |   |   |   |   |
| SGO_1851 | 0.035                  | 8.603                | 0.1049  | 0.7821  | 99.500 | 69.500  | 103.9529   | 106.1313 | proS; prolyl-tRNA synthetase                                |                         |    |    |   |   |   |   |
|          |                        |                      |         |         | 92.500 | 52.500  | 92.5000    | 86.3266  |                                                             |                         |    |    |   |   |   |   |
| SGO_1854 | 0.517                  | 5.493                | 0.0244  | 0.1434  | 16.000 | 5.000   | 16.7160    | 7.6353   | uppS; undecaprenyl diphosphate synthase                     |                         |    |    |   |   |   |   |
|          |                        |                      |         |         | 10.000 | 6.500   | 10.0000    | 10.6881  |                                                             |                         |    |    |   |   |   |   |
| SGO_1856 | -3.472                 | 8.392                | 0.0042  | 0.0144  | 14.000 | 132.500 | 14.6265    | 202.3366 | ATP-dependent proteinase ATP-binding chain                  |                         |    |    |   |   |   |   |
|          |                        |                      |         |         | 12.000 | 65.000  | 12.0000    | 106.8805 |                                                             |                         |    |    |   |   |   |   |
| SGO_1858 | -0.633                 | 4.293                | 0.0040  | 0.0137  | 4.000  | 3.500   | 4.1790     | 5.3447   | beta-fructofuranosidase/sucrose 6 phoshate hydrolase        |                         |    |    |   |   |   |   |
|          |                        |                      |         |         | 3.500  | 4.000   | 3.5000     | 6.5773   |                                                             |                         |    |    |   |   |   |   |
| SGO_1860 | -0.721                 | 8.138                | 0.0156  | 0.0833  | 53.000 | 74.500  | 55.3719    | 113.7666 | 5'-nucleotidase, lipoprotein e(P4) family                   |                         |    |    |   |   |   |   |
|          |                        |                      |         |         | 48.500 | 39.000  | 48.5000    | 64.1283  |                                                             |                         |    |    |   |   |   |   |
| SGO_1862 | -1.778                 | 7.869                | 0.0006  | 0.0006  | 26.500 | 54.500  | 27.6859    | 83.2252  | alkaline shock protein                                      |                         |    |    |   |   |   |   |
|          |                        |                      |         |         | 25.000 | 59.500  | 25.0000    | 97.8368  |                                                             |                         |    |    |   |   |   |   |
| SGO_1863 | 1.017                  | 7.780                | 0.0009  | 0.0014  | 69.000 | 27.500  | 72.0879    | 41.9944  | efp; Elongation factor P (EF-P)                             |                         |    |    |   |   |   |   |
|          |                        |                      |         |         | 74.500 | 19.000  | 74.5000    | 31.2420  |                                                             |                         |    |    |   |   |   |   |
| SGO_1864 | -1.379                 | 7.834                | 0.0001  | 0.0000  | 30.000 | 53.000  | 31.3426    | 80.9346  | X-Pro aminopeptidase                                        |                         |    |    |   |   |   |   |
|          |                        |                      |         |         | 32.000 | 51.000  | 32.0000    | 83.8601  |                                                             |                         |    |    |   |   |   |   |
| SGO_1865 | -0.713                 | 6.543                | 0.0014  | 0.0032  | 17.000 | 17.500  | 17.7608    | 26.7237  | uvrA; excinuclease ABC, A subunit                           |                         |    |    |   |   |   |   |
|          |                        |                      |         |         | 17.500 | 19.000  | 17.5000    | 31.2420  |                                                             |                         |    |    |   |   |   |   |
| SGO_1867 | 2.522                  | 6.302                | 0.0002  | 0.0001  | 31.500 | 3.000   | 32.9097    | 4.5812   | hypothetical protein SGO_1867                               |                         |    |    |   |   |   |   |
|          |                        |                      |         |         | 34.000 | 4.500   | 34.0000    | 7.3994   |                                                             |                         |    |    |   |   |   |   |
| SGO_1879 | 0.132                  | 7.433                | 0.0562  | 0.3870  | 46.000 | 23.500  | 48.0586    | 35.8861  | rpsR; ribosomal protein S18                                 |                         |    |    |   |   |   |   |
|          |                        |                      |         |         | 42.000 | 28.500  | 42.0000    | 46.8630  |                                                             |                         |    |    |   |   |   |   |

- Show detected proteins only  
 Show all proteins

Proteins found:  
713

Filter by category:

ABC Transporter

Test

Cutoff

q-Value

.005

p-Value

|             | Signif | Direction | Applies To   |
|-------------|--------|-----------|--------------|
| Red         | yes    | +         | ratios, bars |
| Yellow      | no     | n/a       | bars         |
| Green       | yes    | -         | ratios, bars |
| Pink        | yes    | +         | p-, q-Values |
| Light Green | yes    | -         | p-, q-Values |

Dot Plots Dot Plots

Summary Table

SgFn vs Sg

SgPg vs Sg

SgPgFn vs Sg

SgPg vs SgFn

SgPgFn vs SgFn

SgPgFn vs SgPg

Coverage

SgPg vs SgFn

Raw

Normalized

Log<sub>2</sub> Ratios

| Protein  | SgPg vs SgFn           |                      |         |         | Raw     |         | Normalized |           | Description                                | Log <sub>2</sub> Ratios |    |    |   |   |
|----------|------------------------|----------------------|---------|---------|---------|---------|------------|-----------|--------------------------------------------|-------------------------|----|----|---|---|
|          | Log <sub>2</sub> Ratio | Log <sub>2</sub> Sum | q-Value | p-Value | SgPg    | SgFn    | SgPg       | SgFn      |                                            | -6                      | -4 | -2 | 0 | 2 |
| SGO_1880 | 1.192                  | 7.919                | 0.0004  | 0.0003  | 76.500  | 24.000  | 79.9236    | 36.6496   | ssb-1; single-strand binding protein       |                         |    |    |   |   |
|          |                        |                      |         |         | 88.500  | 22.500  | 88.5000    | 36.9971   |                                            |                         |    |    |   |   |
| SGO_1881 | 1.188                  | 9.153                | 0.0034  | 0.0109  | 214.000 | 44.500  | 223.5770   | 67.9545   | rpsF; ribosomal protein S6                 |                         |    |    |   |   |
|          |                        |                      |         |         | 170.000 | 65.500  | 170.0000   | 107.7027  |                                            |                         |    |    |   |   |
| SGO_1882 | 0.395                  | 5.908                | 0.0260  | 0.1553  | 13.500  | 10.000  | 14.1042    | 15.2707   | folE; GTP cyclohydrolase I                 |                         |    |    |   |   |
|          |                        |                      |         |         | 20.000  | 6.500   | 20.0000    | 10.6881   |                                            |                         |    |    |   |   |
| SGO_1885 | -2.739                 | 11.639               | 0.0000  | 0.0000  | 200.000 | 909.500 | 208.9505   | 1388.8687 | groL; 60 kDa chaperonin/groEL protein      |                         |    |    |   |   |
|          |                        |                      |         |         | 206.500 | 842.500 | 206.5000   | 1385.3362 |                                            |                         |    |    |   |   |
| SGO_1886 | -1.663                 | 6.874                | 0.0125  | 0.0626  | 17.000  | 17.500  | 17.7608    | 26.7237   | groES; chaperonin, 10 kDa                  |                         |    |    |   |   |
|          |                        |                      |         |         | 9.500   | 38.500  | 9.5000     | 63.3062   |                                            |                         |    |    |   |   |
| SGO_1892 | -2.895                 | 7.801                | 0.0024  | 0.0068  | 11.000  | 79.000  | 11.4923    | 120.6384  | PTS system, fructose(mannose)-specific IIB |                         |    |    |   |   |
|          |                        |                      |         |         | 14.500  | 46.500  | 14.5000    | 76.4607   |                                            |                         |    |    |   |   |
| SGO_1898 | -1.710                 | 8.931                | 0.0007  | 0.0009  | 53.500  | 111.500 | 55.8943    | 170.2681  | glutamyl aminopeptidase                    |                         |    |    |   |   |
|          |                        |                      |         |         | 58.000  | 124.000 | 58.0000    | 203.8952  |                                            |                         |    |    |   |   |
| SGO_1901 | 1.204                  | 6.178                | 0.0069  | 0.0283  | 28.000  | 10.000  | 29.2531    | 15.2707   | tRNA binding domain                        |                         |    |    |   |   |
|          |                        |                      |         |         | 20.500  | 4.500   | 20.5000    | 7.3994    |                                            |                         |    |    |   |   |
| SGO_1903 | -0.484                 | 7.863                | 0.0087  | 0.0402  | 44.500  | 51.000  | 46.4915    | 77.8805   | ATP-dependent Zn protease                  |                         |    |    |   |   |
|          |                        |                      |         |         | 50.000  | 35.500  | 50.0000    | 58.3732   |                                            |                         |    |    |   |   |
| SGO_1912 | -0.548                 | 4.283                | 0.0072  | 0.0301  | 5.500   |         | 5.7461     |           | Bifunctional folate synthesis protein      |                         |    |    |   |   |
|          |                        |                      |         |         | 5.500   | 5.000   | 5.5000     | 8.2216    |                                            |                         |    |    |   |   |
| SGO_1914 | -0.729                 | 4.433                | 0.0011  | 0.0020  | 3.500   | 4.500   | 3.6566     | 6.8718    | folP; dihydropteroate synthase             |                         |    |    |   |   |
|          |                        |                      |         |         | 4.500   | 4.000   | 4.5000     | 6.5773    |                                            |                         |    |    |   |   |
| SGO_1916 | 0.333                  | 8.040                | 0.0002  | 0.0001  | 70.500  | 37.500  | 73.6550    | 57.2651   | ackA; acetate kinase                       |                         |    |    |   |   |
|          |                        |                      |         |         | 73.000  | 36.000  | 73.0000    | 59.1954   |                                            |                         |    |    |   |   |

- Show detected proteins only  
 Show all proteins

Proteins found:  
713

Filter by category:

ABC Transporter

Test

Cutoff

q-Value

.005

p-Value

|             | Signif | Direction | Applies To   |
|-------------|--------|-----------|--------------|
| Red         | yes    | +         | ratios, bars |
| Yellow      | no     | n/a       | bars         |
| Green       | yes    | -         | ratios, bars |
| Pink        | yes    | +         | p-, q-Values |
| Light Green | yes    | -         | p-, q-Values |

Dot Plots Dot Plots

Summary Table

SgFn vs Sg

SgPg vs Sg

SgPgFn vs Sg

SgPg vs SgFn

SgPgFn vs SgFn

SgPgFn vs SgPg

Coverage

SgPg vs SgFn

Raw

Normalized

Log<sub>2</sub> Ratios

| Protein  | SgPg vs SgFn           |                      |         |         | Raw     |         | Normalized |          | Description                                              | Log <sub>2</sub> Ratios |    |    |   |   |   |   |
|----------|------------------------|----------------------|---------|---------|---------|---------|------------|----------|----------------------------------------------------------|-------------------------|----|----|---|---|---|---|
|          | Log <sub>2</sub> Ratio | Log <sub>2</sub> Sum | q-Value | p-Value | SgPg    | SgFn    | SgPg       | SgFn     |                                                          | -6                      | -4 | -2 | 0 | 2 | 4 | 6 |
| SGO_1917 | 0.195                  | 4.942                | 0.0506  | 0.3436  | 9.000   | 4.000   | 9.4028     | 6.1083   | hypothetical protein SGO_1917                            |                         |    |    |   |   |   |   |
|          |                        |                      |         |         | 7.000   | 5.000   | 7.0000     | 8.2216   |                                                          |                         |    |    |   |   |   |   |
| SGO_1926 | 0.371                  | 9.973                | 0.0006  | 0.0007  | 277.000 | 146.500 | 289.3964   | 223.7155 | rpoC; DNA-directed RNA polymerase, beta chain            |                         |    |    |   |   |   |   |
|          |                        |                      |         |         | 277.500 | 130.500 | 277.5000   | 214.5832 |                                                          |                         |    |    |   |   |   |   |
| SGO_1927 | 0.571                  | 9.680                | 0.0141  | 0.0739  | 228.000 | 141.000 | 238.2036   | 215.3166 | rpoB; DNA-directed RNA polymerase, beta subunit          |                         |    |    |   |   |   |   |
|          |                        |                      |         |         | 244.500 | 74.500  | 244.5000   | 122.5015 |                                                          |                         |    |    |   |   |   |   |
| SGO_1929 | 1.102                  | 8.867                | 0.0008  | 0.0013  | 164.500 | 48.000  | 171.8618   | 73.2993  | tyrS; tyrosyl-tRNA synthetase                            |                         |    |    |   |   |   |   |
|          |                        |                      |         |         | 147.000 | 45.500  | 147.0000   | 74.8164  |                                                          |                         |    |    |   |   |   |   |
| SGO_1936 | 1.236                  | 6.497                | 0.0004  | 0.0004  | 32.000  | 9.000   | 33.4321    | 13.7436  | adcA; metal-binding (Mn) permease precursor, lipoprotein |                         |    |    |   |   |   |   |
|          |                        |                      |         |         | 30.000  | 8.000   | 30.0000    | 13.1545  |                                                          |                         |    |    |   |   |   |   |
| SGO_1957 | -1.798                 | 4.035                | 0.0345  | 0.2178  |         | 3.500   |            | 5.3447   | hypothetical protein SGO_1957                            |                         |    |    |   |   |   |   |
|          |                        |                      |         |         | 2.000   | 5.500   | 2.0000     | 9.0437   |                                                          |                         |    |    |   |   |   |   |
| SGO_1958 | 3.171                  | 9.577                | 0.0002  | 0.0002  | 350.000 | 27.500  | 365.6633   | 41.9944  | rplQ; ribosomal protein L17                              |                         |    |    |   |   |   |   |
|          |                        |                      |         |         | 321.500 | 21.000  | 321.5000   | 34.5306  |                                                          |                         |    |    |   |   |   |   |
| SGO_1959 | 0.453                  | 8.899                | 0.0029  | 0.0089  | 125.000 | 61.000  | 130.5941   | 93.1512  | rpoA; DNA-directed RNA polymerase, alpha subunit         |                         |    |    |   |   |   |   |
|          |                        |                      |         |         | 145.000 | 66.000  | 145.0000   | 108.5249 |                                                          |                         |    |    |   |   |   |   |
| SGO_1960 | 0.749                  | 7.652                | 0.0050  | 0.0192  | 56.500  | 30.500  | 59.0285    | 46.5756  | rpsK; ribosomal protein S11                              |                         |    |    |   |   |   |   |
|          |                        |                      |         |         | 66.000  | 18.000  | 66.0000    | 29.5977  |                                                          |                         |    |    |   |   |   |   |
| SGO_1961 | 2.673                  | 9.052                | 0.0002  | 0.0001  | 231.500 | 27.000  | 241.8602   | 41.2308  | rpsM; ribosomal protein S13p/S18e                        |                         |    |    |   |   |   |   |
|          |                        |                      |         |         | 216.500 | 19.000  | 216.5000   | 31.2420  |                                                          |                         |    |    |   |   |   |   |
| SGO_1964 | 0.441                  | 8.106                | 0.0161  | 0.0875  | 75.500  | 47.500  | 78.8788    | 72.5358  | adk; Adenylate kinase (ATP-AMP transphosphorylase)       |                         |    |    |   |   |   |   |
|          |                        |                      |         |         | 78.000  | 28.000  | 78.0000    | 46.0408  |                                                          |                         |    |    |   |   |   |   |
| SGO_1966 | 0.648                  | 8.744                | 0.0282  | 0.1723  | 94.000  | 75.000  | 98.2067    | 114.5301 | rplO; ribosomal protein L15                              |                         |    |    |   |   |   |   |
|          |                        |                      |         |         | 160.000 | 34.000  | 160.0000   | 55.9067  |                                                          |                         |    |    |   |   |   |   |

- Show detected proteins only  
 Show all proteins

Proteins found:  
713

Filter by category:

ABC Transporter

Test

Cutoff

q-Value

.005

p-Value

|             | Signif | Direction | Applies To   |
|-------------|--------|-----------|--------------|
| Red         | yes    | +         | ratios, bars |
| Yellow      | no     | n/a       | bars         |
| Green       | yes    | -         | ratios, bars |
| Pink        | yes    | +         | p-, q-Values |
| Light Green | yes    | -         | p-, q-Values |

Dot Plots Dot Plots

Summary Table SgFn vs Sg SgPg vs Sg SgPgFn vs Sg SgPg vs SgFn SgPgFn vs SgFn SgPgFn vs SgPg Coverage

| Protein  | SgPg vs SgFn           |                      |         |         | Raw     |         | Normalized |          | Description                                | Log <sub>2</sub> Ratios |    |    |   |   |
|----------|------------------------|----------------------|---------|---------|---------|---------|------------|----------|--------------------------------------------|-------------------------|----|----|---|---|
|          | Log <sub>2</sub> Ratio | Log <sub>2</sub> Sum | q-Value | p-Value | SgPg    | SgFn    | SgPg       | SgFn     |                                            | -6                      | -4 | -2 | 0 | 2 |
| SGO_1967 | 2.111                  | 8.152                | 0.0006  | 0.0007  | 116.000 | 13.000  | 121.1913   | 19.8519  | 50S ribosomal protein L30 -related protein |                         |    |    |   |   |
|          |                        |                      |         |         | 108.000 | 21.500  | 108.0000   | 35.3528  |                                            |                         |    |    |   |   |
| SGO_1968 | 1.261                  | 9.565                | 0.0006  | 0.0007  | 263.000 | 84.000  | 274.7699   | 128.2737 | rpsE; ribosomal protein S5                 |                         |    |    |   |   |
|          |                        |                      |         |         | 258.000 | 58.500  | 258.0000   | 96.1925  |                                            |                         |    |    |   |   |
| SGO_1969 | 1.721                  | 9.530                | 0.0005  | 0.0005  | 270.500 | 71.000  | 282.6055   | 108.4219 | rplR; ribosomal protein L18                |                         |    |    |   |   |
|          |                        |                      |         |         | 281.000 | 41.000  | 281.0000   | 67.4170  |                                            |                         |    |    |   |   |
| SGO_1970 | 1.370                  | 8.992                | 0.0003  | 0.0002  | 178.500 | 52.000  | 186.4883   | 79.4076  | BL10; 50S ribosomal protein L6             |                         |    |    |   |   |
|          |                        |                      |         |         | 180.000 | 38.500  | 180.0000   | 63.3062  |                                            |                         |    |    |   |   |
| SGO_1971 | 1.758                  | 10.068               | 0.0002  | 0.0001  | 411.500 | 79.000  | 429.9156   | 120.6384 | rpsH; ribosomal protein S8                 |                         |    |    |   |   |
|          |                        |                      |         |         | 398.500 | 75.500  | 398.5000   | 124.1459 |                                            |                         |    |    |   |   |
| SGO_1973 | 1.138                  | 9.139                | 0.0002  | 0.0001  | 189.500 | 60.500  | 197.9806   | 92.3876  | BL6; 50S ribosomal protein L5              |                         |    |    |   |   |
|          |                        |                      |         |         | 189.500 | 51.000  | 189.5000   | 83.8601  |                                            |                         |    |    |   |   |
| SGO_1974 | 0.886                  | 7.983                | 0.0021  | 0.0053  | 74.500  | 34.500  | 77.8341    | 52.6839  | rplX; ribosomal protein L24                |                         |    |    |   |   |
|          |                        |                      |         |         | 85.500  | 22.500  | 85.5000    | 36.9971  |                                            |                         |    |    |   |   |
| SGO_1975 | 0.875                  | 8.196                | 0.0021  | 0.0051  | 92.500  | 40.500  | 96.6396    | 61.8463  | rplN; ribosomal protein L14                |                         |    |    |   |   |
|          |                        |                      |         |         | 92.000  | 26.000  | 92.0000    | 42.7522  |                                            |                         |    |    |   |   |
| SGO_1976 | 2.459                  | 8.387                | 0.0007  | 0.0009  | 121.500 | 14.500  | 126.9374   | 22.1425  | BS16; 30S ribosomal protein                |                         |    |    |   |   |
|          |                        |                      |         |         | 156.000 | 18.000  | 156.0000   | 29.5977  |                                            |                         |    |    |   |   |
| SGO_1977 | 0.476                  | 5.445                | 0.0390  | 0.2551  | 13.500  | 7.500   | 14.1042    | 11.4530  | rpmC; ribosomal protein L29                |                         |    |    |   |   |
|          |                        |                      |         |         | 18.000  |         | 18.0000    |          |                                            |                         |    |    |   |   |
| SGO_1978 | 1.680                  | 8.238                | 0.0001  | 0.0000  | 110.500 | 25.000  | 115.4451   | 38.1767  | rplP; ribosomal protein L16                |                         |    |    |   |   |
|          |                        |                      |         |         | 114.500 | 20.500  | 114.5000   | 33.7085  |                                            |                         |    |    |   |   |
| SGO_1979 | 0.002                  | 9.240                | 0.1243  | 0.9528  | 148.000 | 88.500  | 154.6234   | 135.1456 | rpsC; ribosomal protein S3                 |                         |    |    |   |   |
|          |                        |                      |         |         | 147.000 | 102.000 | 147.0000   | 167.7202 |                                            |                         |    |    |   |   |

Show detected proteins only  
 Show all proteins

Filter by category:

Proteins found: 713

**Test**      **Cutoff**

    

| Signif | Direction | Applies To   |
|--------|-----------|--------------|
| yes    | +         | ratios, bars |
| no     | n/a       | bars         |
| yes    | -         | ratios, bars |
| yes    | +         | p-, q-Values |
| yes    | -         | p-, q-Values |



Summary Table

SgFn vs Sg

SgPg vs Sg

SgPgFn vs Sg

SgPg vs SgFn

SgPgFn vs SgFn

SgPgFn vs SgPg

Coverage

SgPg vs SgFn

Raw

Normalized

Log<sub>2</sub> Ratios

| Protein  | SgPg vs SgFn           |                      |         |         | Raw     |         | Normalized |          | Description                                                      | Log <sub>2</sub> Ratios |    |    |   |   |   |   |
|----------|------------------------|----------------------|---------|---------|---------|---------|------------|----------|------------------------------------------------------------------|-------------------------|----|----|---|---|---|---|
|          | Log <sub>2</sub> Ratio | Log <sub>2</sub> Sum | q-Value | p-Value | SgPg    | SgFn    | SgPg       | SgFn     |                                                                  | -6                      | -4 | -2 | 0 | 2 | 4 | 6 |
| SGO_1980 | 1.141                  | 8.930                | 0.0002  | 0.0002  | 164.000 | 53.500  | 171.3394   | 81.6982  | rplV; ribosomal protein L22                                      |                         |    |    |   |   |   |   |
|          |                        |                      |         |         | 164.000 | 43.000  | 164.0000   | 70.7056  |                                                                  |                         |    |    |   |   |   |   |
| SGO_1981 | 0.174                  | 8.715                | 0.0107  | 0.0510  | 100.000 | 64.000  | 104.4752   | 97.7324  | rpsS; ribosomal protein S19                                      |                         |    |    |   |   |   |   |
|          |                        |                      |         |         | 118.500 | 60.500  | 118.5000   | 99.4811  |                                                                  |                         |    |    |   |   |   |   |
| SGO_1982 | 0.153                  | 8.650                | 0.0843  | 0.6166  | 107.000 | 78.500  | 111.7885   | 119.8749 | rplB; ribosomal protein L2                                       |                         |    |    |   |   |   |   |
|          |                        |                      |         |         | 97.000  | 44.500  | 97.0000    | 73.1721  |                                                                  |                         |    |    |   |   |   |   |
| SGO_1983 | 1.231                  | 7.880                | 0.0079  | 0.0346  | 91.000  | 14.500  | 95.0725    | 22.1425  | rplW; ribosomal protein L23                                      |                         |    |    |   |   |   |   |
|          |                        |                      |         |         | 66.500  | 31.500  | 66.5000    | 51.7960  |                                                                  |                         |    |    |   |   |   |   |
| SGO_1984 | 0.473                  | 9.229                | 0.0014  | 0.0030  | 158.000 | 81.500  | 165.0709   | 124.4561 | rplD; ribosomal protein L4/L1 family                             |                         |    |    |   |   |   |   |
|          |                        |                      |         |         | 184.000 | 77.000  | 184.0000   | 126.6123 |                                                                  |                         |    |    |   |   |   |   |
| SGO_1985 | 0.999                  | 9.986                | 0.0136  | 0.0706  | 223.000 | 123.000 | 232.9798   | 187.8294 | rplC; ribosomal protein L3                                       |                         |    |    |   |   |   |   |
|          |                        |                      |         |         | 453.000 | 85.500  | 453.0000   | 140.5890 |                                                                  |                         |    |    |   |   |   |   |
| SGO_1986 | 0.777                  | 7.231                | 0.0011  | 0.0020  | 42.500  | 19.000  | 44.4020    | 29.0143  | rpsJ; ribosomal protein S10                                      |                         |    |    |   |   |   |   |
|          |                        |                      |         |         | 50.500  | 16.000  | 50.5000    | 26.3091  |                                                                  |                         |    |    |   |   |   |   |
| SGO_1989 | 0.802                  | 9.478                | 0.0007  | 0.0008  | 226.500 | 89.500  | 236.6364   | 136.6726 | purA; adenylosuccinate synthetase                                |                         |    |    |   |   |   |   |
|          |                        |                      |         |         | 216.500 | 75.000  | 216.5000   | 123.3237 |                                                                  |                         |    |    |   |   |   |   |
| SGO_1990 | -2.053                 | 6.535                | 0.0013  | 0.0027  | 6.000   | 21.500  | 6.2685     | 32.8320  | glutamate--cysteine ligase, putative/amino acid ligase, putative |                         |    |    |   |   |   |   |
|          |                        |                      |         |         | 12.500  | 25.000  | 12.5000    | 41.1079  |                                                                  |                         |    |    |   |   |   |   |
| SGO_1991 | -2.454                 | 5.522                | 0.0001  | 0.0000  | 3.000   | 12.500  | 3.1343     | 19.0884  | hsI0; 33 kDa chaperonin /Heat shock protein 33-like protein      |                         |    |    |   |   |   |   |
|          |                        |                      |         |         | 4.000   | 12.000  | 4.0000     | 19.7318  |                                                                  |                         |    |    |   |   |   |   |
| SGO_1993 | 1.046                  | 6.030                | 0.0009  | 0.0014  | 22.500  | 7.500   | 23.5069    | 11.4530  | possible transcriptional regulator                               |                         |    |    |   |   |   |   |
|          |                        |                      |         |         | 20.500  | 6.000   | 20.5000    | 9.8659   |                                                                  |                         |    |    |   |   |   |   |
| SGO_1998 | 0.053                  | 6.720                | 0.0848  | 0.6222  | 22.000  | 17.000  | 22.9846    | 25.9602  | clpB; ATP-dependent Clp proteinase, ATP-binding chain            |                         |    |    |   |   |   |   |
|          |                        |                      |         |         | 31.000  | 15.500  | 31.0000    | 25.4869  |                                                                  |                         |    |    |   |   |   |   |

 Show detected proteins only Show all proteinsProteins found:  
713 Filter by category:

ABC Transporter

Test

Cutoff

q-Value

.005

p-Value

|             | Signif | Direction | Applies To   |
|-------------|--------|-----------|--------------|
| Red         | yes    | +         | ratios, bars |
| Yellow      | no     | n/a       | bars         |
| Green       | yes    | -         | ratios, bars |
| Pink        | yes    | +         | p-, q-Values |
| Light Green | yes    | -         | p-, q-Values |

Dot Plots Dot Plots

Summary Table

SgFn vs Sg

SgPg vs Sg

SgPgFn vs Sg

SgPg vs SgFn

SgPgFn vs SgFn

SgPgFn vs SgPg

Coverage

| Protein  | SgPg vs SgFn           |                      |         |         | Raw     |         | Normalized |          | Description                                                 | Log <sub>2</sub> Ratios |    |    |   |   |
|----------|------------------------|----------------------|---------|---------|---------|---------|------------|----------|-------------------------------------------------------------|-------------------------|----|----|---|---|
|          | Log <sub>2</sub> Ratio | Log <sub>2</sub> Sum | q-Value | p-Value | SgPg    | SgFn    | SgPg       | SgFn     |                                                             | -6                      | -4 | -2 | 0 | 2 |
| SGO_2000 | 0.341                  | 10.640               | 0.0032  | 0.0103  | 437.500 | 247.500 | 457.0792   | 377.9494 | tsf; translation elongation factor Ts                       |                         |    |    |   |   |
|          |                        |                      |         |         | 434.000 | 199.000 | 434.0000   | 327.2189 |                                                             |                         |    |    |   |   |
| SGO_2001 | 0.226                  | 10.354               | 0.0122  | 0.0605  | 347.500 | 180.000 | 363.0515   | 274.8723 | rpsB; ribosomal protein S2                                  |                         |    |    |   |   |
|          |                        |                      |         |         | 341.500 | 200.500 | 341.5000   | 329.6853 |                                                             |                         |    |    |   |   |
| SGO_2005 | 1.031                  | 4.389                | 0.0158  | 0.0855  | 7.500   |         | 7.8356     |          | LPXTG cell wall surface protein                             |                         |    |    |   |   |
|          |                        |                      |         |         | 9.000   | 2.500   | 9.0000     | 4.1108   |                                                             |                         |    |    |   |   |
| SGO_2007 | -0.429                 | 6.891                | 0.0009  | 0.0016  | 25.500  | 22.500  | 26.6412    | 34.3590  | nusG; transcription termination/antitermination factor NusG |                         |    |    |   |   |
|          |                        |                      |         |         | 24.000  | 20.500  | 24.0000    | 33.7085  |                                                             |                         |    |    |   |   |
| SGO_2033 | -1.280                 | 7.538                | 0.0003  | 0.0003  | 26.500  | 41.000  | 27.6859    | 62.6098  | nrdD; ribonucleoside-triphosphate reductase                 |                         |    |    |   |   |
|          |                        |                      |         |         | 26.500  | 42.000  | 26.5000    | 69.0613  |                                                             |                         |    |    |   |   |
| SGO_2034 | -0.740                 | 3.288                |         |         | 3.500   | 4.000   | 3.6566     | 6.1083   | hypothetical protein SGO_2034                               |                         |    |    |   |   |
|          |                        |                      |         |         |         |         |            |          |                                                             |                         |    |    |   |   |
| SGO_2042 | 1.423                  | 8.197                | 0.0021  | 0.0052  | 92.500  | 35.000  | 96.6396    | 53.4474  | Bacterial protein of unknown function (DUF965) superfamily  |                         |    |    |   |   |
|          |                        |                      |         |         | 114.500 | 17.500  | 114.5000   | 28.7755  |                                                             |                         |    |    |   |   |
| SGO_2045 | 3.160                  | 9.855                | 0.0000  | 0.0000  | 389.500 | 32.000  | 406.9311   | 48.8662  | recA; recA protein                                          |                         |    |    |   |   |
|          |                        |                      |         |         | 426.000 | 27.000  | 426.0000   | 44.3965  |                                                             |                         |    |    |   |   |
| SGO_2046 | -0.120                 | 5.303                | 0.0188  | 0.1070  | 9.500   | 7.000   | 9.9251     | 10.6895  | cinA; competence induced protein                            |                         |    |    |   |   |
|          |                        |                      |         |         | 9.000   | 6.000   | 9.0000     | 9.8659   |                                                             |                         |    |    |   |   |
| SGO_2050 | 1.133                  | 3.770                | 0.0411  | 0.2701  | 4.000   |         | 4.1790     |          | ruvA; Holliday junction DNA helicase RuvA                   |                         |    |    |   |   |
|          |                        |                      |         |         | 7.000   | 1.500   | 7.0000     | 2.4665   |                                                             |                         |    |    |   |   |
| SGO_2053 | -0.856                 | 5.395                | 0.0050  | 0.0190  | 5.500   | 9.500   | 5.7461     | 14.5072  | DNA mismatch repair protein hexB                            |                         |    |    |   |   |
|          |                        |                      |         |         | 9.500   | 7.500   | 9.5000     | 12.3324  |                                                             |                         |    |    |   |   |
| SGO_2056 | -1.072                 | 6.628                | 0.0033  | 0.0109  | 12.500  | 19.000  | 13.0594    | 29.0143  | mutS; DNA mismatch repair protein MutS                      |                         |    |    |   |   |
|          |                        |                      |         |         | 19.000  | 23.000  | 19.0000    | 37.8193  |                                                             |                         |    |    |   |   |

- Show detected proteins only
- Show all proteins

Proteins found: 713

Filter by category:  
ABC Transporter

Test

Cutoff

q-Value

.005

p-Value

|             | Signif | Direction | Applies To   |
|-------------|--------|-----------|--------------|
| Red         | yes    | +         | ratios, bars |
| Yellow      | no     | n/a       | bars         |
| Green       | yes    | -         | ratios, bars |
| Pink        | yes    | +         | p-, q-Values |
| Light Green | yes    | -         | p-, q-Values |

Dot Plots Dot Plots

Summary Table

SgFn vs Sg

SgPg vs Sg

SgPgFn vs Sg

SgPg vs SgFn

SgPgFn vs SgFn

SgPgFn vs SgPg

Coverage

SgPg vs SgFn

Raw

Normalized

Log<sub>2</sub> Ratios

| Protein  | SgPg vs SgFn           |                      |         |         | Raw     |         | Normalized |          | Description                               | Log <sub>2</sub> Ratios |    |    |   |   |   |   |
|----------|------------------------|----------------------|---------|---------|---------|---------|------------|----------|-------------------------------------------|-------------------------|----|----|---|---|---|---|
|          | Log <sub>2</sub> Ratio | Log <sub>2</sub> Sum | q-Value | p-Value | SgPg    | SgFn    | SgPg       | SgFn     |                                           | -6                      | -4 | -2 | 0 | 2 | 4 | 6 |
| SGO_2058 | -0.325                 | 9.745                | 0.0011  | 0.0020  | 188.000 | 152.500 | 196.4135   | 232.8779 | argS; arginyl-tRNA synthetase             |                         |    |    |   |   |   |   |
|          |                        |                      |         |         | 184.500 | 148.500 | 184.5000   | 244.1809 |                                           |                         |    |    |   |   |   |   |
| SGO_2060 | 0.399                  | 7.832                | 0.0038  | 0.0130  | 61.500  | 29.000  | 64.2523    | 44.2850  | aspS-1; aspartyl-tRNA synthetase          |                         |    |    |   |   |   |   |
|          |                        |                      |         |         | 65.000  | 33.000  | 65.0000    | 54.2624  |                                           |                         |    |    |   |   |   |   |
| SGO_2062 | -0.579                 | 8.567                | 0.0028  | 0.0084  | 77.500  | 80.500  | 80.9683    | 122.9290 | hisS; histidyl-tRNA synthetase            |                         |    |    |   |   |   |   |
|          |                        |                      |         |         | 71.000  | 63.500  | 71.0000    | 104.4141 |                                           |                         |    |    |   |   |   |   |
| SGO_2064 | 0.430                  | 8.872                | 0.0029  | 0.0089  | 138.000 | 67.000  | 144.1758   | 102.3136 | ilvD; dihydroxy-acid dehydratase          |                         |    |    |   |   |   |   |
|          |                        |                      |         |         | 125.000 | 59.000  | 125.0000   | 97.0146  |                                           |                         |    |    |   |   |   |   |
| SGO_2066 | 1.727                  | 7.190                | 0.0158  | 0.0853  | 66.500  | 12.500  | 69.4760    | 19.0884  | rpmG; ribosomal protein L33               |                         |    |    |   |   |   |   |
|          |                        |                      |         |         | 57.500  |         | 57.5000    |          |                                           |                         |    |    |   |   |   |   |
| SGO_2070 | 0.507                  | 5.531                | 0.0345  | 0.2179  | 15.000  | 8.500   | 15.6713    | 12.9801  | hypothetical protein SGO_2070             |                         |    |    |   |   |   |   |
|          |                        |                      |         |         | 11.000  | 4.000   | 11.0000    | 6.5773   |                                           |                         |    |    |   |   |   |   |
| SGO_2084 | -0.269                 | 4.253                | 0.0745  | 0.5363  |         | 3.500   |            | 5.3447   | NAD(P)H dehydrogenase, quinone family     |                         |    |    |   |   |   |   |
|          |                        |                      |         |         | 5.500   | 5.000   | 5.5000     | 8.2216   |                                           |                         |    |    |   |   |   |   |
| SGO_2085 | 0.571                  | 7.367                | 0.0003  | 0.0003  | 48.000  | 22.500  | 50.1481    | 34.3590  | purB; adenylosuccinate lyase              |                         |    |    |   |   |   |   |
|          |                        |                      |         |         | 48.500  | 19.500  | 48.5000    | 32.0642  |                                           |                         |    |    |   |   |   |   |
| SGO_2098 | 0.377                  | 10.921               | 0.0072  | 0.0303  | 519.500 | 313.000 | 542.7489   | 477.9724 | rpsD; ribosomal protein S4                |                         |    |    |   |   |   |   |
|          |                        |                      |         |         | 548.500 | 224.500 | 548.5000   | 369.1489 |                                           |                         |    |    |   |   |   |   |
| SGO_2100 | 3.516                  | 8.239                | 0.0002  | 0.0001  | 140.500 | 9.000   | 146.7877   | 13.7436  | ABC transporter substrate-binding protein |                         |    |    |   |   |   |   |
|          |                        |                      |         |         | 131.000 | 6.500   | 131.0000   | 10.6881  |                                           |                         |    |    |   |   |   |   |
| SGO_2104 | 0.230                  | 7.893                | 0.0562  | 0.3877  | 55.000  | 44.500  | 57.4614    | 67.9545  | srtB; sortase B                           |                         |    |    |   |   |   |   |
|          |                        |                      |         |         | 69.500  | 26.000  | 69.5000    | 42.7522  |                                           |                         |    |    |   |   |   |   |
| SGO_2105 | -5.016                 | 9.922                | 0.0000  | 0.0000  | 15.000  | 303.000 | 15.6713    | 462.7017 | abpA; amylase-binding protein AbpA        |                         |    |    |   |   |   |   |
|          |                        |                      |         |         | 13.500  | 291.000 | 13.5000    | 478.4959 |                                           |                         |    |    |   |   |   |   |

 Show detected proteins only Show all proteinsProteins found:  
713 Filter by category:

ABC Transporter

Test

Cutoff

q-Value

.005

p-Value

|             | Signif | Direction | Applies To   |
|-------------|--------|-----------|--------------|
| Red         | yes    | +         | ratios, bars |
| Yellow      | no     | n/a       | bars         |
| Green       | yes    | -         | ratios, bars |
| Pink        | yes    | +         | p-, q-Values |
| Light Green | yes    | -         | p-, q-Values |

Dot Plots Dot Plots

Summary Table

SgFn vs Sg

SgPg vs Sg

SgPgFn vs Sg

SgPg vs SgFn

SgPgFn vs SgFn

SgPgFn vs SgPg

Coverage

SgPg vs SgFn

Raw

Normalized

Log<sub>2</sub> Ratios

| Protein  | SgPg vs SgFn           |                      |         |         | Raw     |         | Normalized |          | Description                                 | Log <sub>2</sub> Ratios |    |    |   |   |   |   |
|----------|------------------------|----------------------|---------|---------|---------|---------|------------|----------|---------------------------------------------|-------------------------|----|----|---|---|---|---|
|          | Log <sub>2</sub> Ratio | Log <sub>2</sub> Sum | q-Value | p-Value | SgPg    | SgFn    | SgPg       | SgFn     |                                             | -6                      | -4 | -2 | 0 | 2 | 4 | 6 |
| SGO_2106 | -0.334                 | 8.056                | 0.0167  | 0.0923  | 52.000  | 55.500  | 54.3271    | 84.7523  | ribose-phosphate diphosphokinase            |                         |    |    |   |   |   |   |
|          |                        |                      |         |         | 63.000  | 39.000  | 63.0000    | 64.1283  |                                             |                         |    |    |   |   |   |   |
| SGO_2133 | -0.447                 | 9.169                | 0.0060  | 0.0240  | 116.000 | 121.000 | 121.1913   | 184.7753 | Cell division protein ftsH-like protein     |                         |    |    |   |   |   |   |
|          |                        |                      |         |         | 121.500 | 90.000  | 121.5000   | 147.9884 |                                             |                         |    |    |   |   |   |   |
| SGO_2134 | -1.405                 | 8.099                | 0.0001  | 0.0000  | 37.500  | 63.500  | 39.1782    | 96.9688  | hpt; hypoxanthine phosphoribosyltransferase |                         |    |    |   |   |   |   |
|          |                        |                      |         |         | 36.000  | 62.000  | 36.0000    | 101.9476 |                                             |                         |    |    |   |   |   |   |
| SGO_2142 | 1.004                  | 7.762                | 0.0008  | 0.0011  | 73.500  | 22.000  | 76.7893    | 33.5955  | GTP-binding protein                         |                         |    |    |   |   |   |   |
|          |                        |                      |         |         | 68.000  | 23.500  | 68.0000    | 38.6414  |                                             |                         |    |    |   |   |   |   |
| SGO_2150 | -0.325                 | 7.102                | 0.0081  | 0.0362  | 29.500  | 27.500  | 30.8202    | 41.9944  | degP; serine protease                       |                         |    |    |   |   |   |   |
|          |                        |                      |         |         | 30.000  | 21.000  | 30.0000    | 34.5306  |                                             |                         |    |    |   |   |   |   |

- Show detected proteins only  
 Show all proteins

Proteins found:  
713

Filter by category:

ABC Transporter

Test

Cutoff

q-Value

.005

p-Value

|             | Signif | Direction | Applies To   |
|-------------|--------|-----------|--------------|
| Red         | yes    | +         | ratios, bars |
| Yellow      | no     | n/a       | bars         |
| Green       | yes    | -         | ratios, bars |
| Pink        | yes    | +         | p-, q-Values |
| Light Green | yes    | -         | p-, q-Values |

Dot Plots Dot Plots
