# Supplementary material for: Proteomics of Streptococcus gordonii within a model developing oral microbial community
Source: PubMed Central journal article supplement (PMC3534352; doi:10.1186/1471-2180-12-211), 2012-09-18
Supplement: 1471-2180-12-211-S6.pdf [file 1471-2180-12-211-S6.pdf]

Summary Table

SgFn vs Sg

SgPg vs Sg

SgPgFn vs Sg

SgPg vs SgFn

SgPgFn vs SgFn

SgPgFn vs SgPg

Coverage

| Protein  | SgPgFn vs SgFn         |                      |         |         | Raw     |        | Normalized |         | Description                                                        | Log <sub>2</sub> Ratios |    |    |   |   |   |   |
|----------|------------------------|----------------------|---------|---------|---------|--------|------------|---------|--------------------------------------------------------------------|-------------------------|----|----|---|---|---|---|
|          | Log <sub>2</sub> Ratio | Log <sub>2</sub> Sum | q-Value | p-Value | SgPgFn  | SgFn   | SgPgFn     | SgFn    |                                                                    | -6                      | -4 | -2 | 0 | 2 | 4 | 6 |
| SGO_0001 | -0.553                 | 5.134                | 0.0078  | 0.0292  | 5.000   | 9.500  | 6.0383     | 9.5000  | dnaA; chromosomal replication initiator protein DnaA               |                         |    |    |   |   |   |   |
|          |                        |                      |         |         | 6.000   | 10.500 | 8.2613     | 11.3062 |                                                                    |                         |    |    |   |   |   |   |
| SGO_0002 | -0.780                 | 6.060                | 0.0016  | 0.0035  | 9.000   | 20.000 | 10.8689    | 20.0000 | dnaN; DNA polymerase III, beta subunit                             |                         |    |    |   |   |   |   |
|          |                        |                      |         |         | 10.000  | 20.500 | 13.7688    | 22.0740 |                                                                    |                         |    |    |   |   |   |   |
| SGO_0004 | -0.356                 | 6.431                | 0.0274  | 0.1457  | 15.000  | 29.500 | 18.1149    | 29.5000 | putative lipoprotein                                               |                         |    |    |   |   |   |   |
|          |                        |                      |         |         | 14.000  | 18.000 | 19.2764    | 19.3820 |                                                                    |                         |    |    |   |   |   |   |
| SGO_0006 | -0.058                 | 6.587                | 0.1084  | 0.7696  | 22.500  | 28.000 | 27.1724    | 28.0000 | ABC transporter, ATP-binding protein                               |                         |    |    |   |   |   |   |
|          |                        |                      |         |         | 14.500  | 19.500 | 19.9648    | 20.9972 |                                                                    |                         |    |    |   |   |   |   |
| SGO_0007 | 1.079                  | 5.516                | 0.0015  | 0.0031  | 13.000  | 9.000  | 15.6996    | 9.0000  | trpS; tryptophanyl-tRNA synthetase                                 |                         |    |    |   |   |   |   |
|          |                        |                      |         |         | 11.000  | 5.500  | 15.1457    | 5.9223  |                                                                    |                         |    |    |   |   |   |   |
| SGO_0008 | 0.651                  | 8.752                | 0.0013  | 0.0020  | 105.500 | 77.000 | 127.4082   | 77.0000 | inosine-5'-monophosphate dehydrogenase                             |                         |    |    |   |   |   |   |
|          |                        |                      |         |         | 98.500  | 84.500 | 135.6229   | 90.9879 |                                                                    |                         |    |    |   |   |   |   |
| SGO_0011 | 0.038                  | 3.580                | 0.1191  | 0.8484  | 4.500   |        | 5.4345     |         | proteinase, M16 family                                             |                         |    |    |   |   |   |   |
|          |                        |                      |         |         | 2.000   | 3.500  | 2.7538     | 3.7687  |                                                                    |                         |    |    |   |   |   |   |
| SGO_0015 | 0.033                  | 2.445                |         |         |         |        |            |         | ABC transporter (ATP-binding protein)                              |                         |    |    |   |   |   |   |
|          |                        |                      |         |         | 2.000   | 2.500  | 2.7538     | 2.6919  |                                                                    |                         |    |    |   |   |   |   |
| SGO_0022 | -3.558                 | 6.740                | 0.0001  | 0.0000  | 3.000   | 50.000 | 3.6230     | 50.0000 | trmU; tRNA (5-methylaminomethyl-2-thiouridylate)-methyltransferase |                         |    |    |   |   |   |   |
|          |                        |                      |         |         | 3.500   | 45.000 | 4.8191     | 48.4551 |                                                                    |                         |    |    |   |   |   |   |
| SGO_0025 | 0.913                  | 4.918                | 0.0230  | 0.1173  | 5.500   | 3.500  | 6.6421     | 3.5000  | gidA; glucose inhibited division protein A                         |                         |    |    |   |   |   |   |
|          |                        |                      |         |         | 9.500   | 6.500  | 13.0804    | 6.9991  |                                                                    |                         |    |    |   |   |   |   |
| SGO_0027 | 0.900                  | 6.144                | 0.0071  | 0.0259  | 15.500  | 11.000 | 18.7187    | 11.0000 | rplI; ribosomal protein L9                                         |                         |    |    |   |   |   |   |
|          |                        |                      |         |         | 20.000  | 12.500 | 27.5376    | 13.4597 |                                                                    |                         |    |    |   |   |   |   |
| SGO_0028 | 0.832                  | 3.141                | 0.0235  | 0.1219  |         | 2.000  |            | 2.0000  | dnaC; replicative DNA helicase                                     |                         |    |    |   |   |   |   |
|          |                        |                      |         |         | 3.000   | 2.500  | 4.1306     | 2.6919  |                                                                    |                         |    |    |   |   |   |   |

Show detected proteins only  
 Show all proteins  
 Filter by category:

Proteins found: 584

**Test**      **Cutoff**  
     

|                                                                    | Signif | Direction | Applies To   |
|--------------------------------------------------------------------|--------|-----------|--------------|
| <span style="background-color: red; color: white;"> </span>        | yes    | +         | ratios, bars |
| <span style="background-color: yellow; color: black;"> </span>     | no     | n/a       | bars         |
| <span style="background-color: green; color: white;"> </span>      | yes    | -         | ratios, bars |
| <span style="background-color: pink; color: black;"> </span>       | yes    | +         | p-, q-Values |
| <span style="background-color: lightgreen; color: black;"> </span> | yes    | -         | p-, q-Values |

Dot Plots Dot Plots

Summary Table

SgFn vs Sg

SgPg vs Sg

SgPgFn vs Sg

SgPg vs SgFn

SgPgFn vs SgFn

SgPgFn vs SgPg

Coverage

SgPgFn vs SgFn

Raw

Normalized

Log<sub>2</sub> Ratios

| Protein  | SgPgFn vs SgFn         |                      |         |         | Raw      |        |           |         | Normalized |        |           |         | Description                                          | Log <sub>2</sub> Ratios |    |    |   |   |   |   |
|----------|------------------------|----------------------|---------|---------|----------|--------|-----------|---------|------------|--------|-----------|---------|------------------------------------------------------|-------------------------|----|----|---|---|---|---|
|          | Log <sub>2</sub> Ratio | Log <sub>2</sub> Sum | q-Value | p-Value | SgPgFn   | SgFn   | SgPgFn    | SgFn    | SgPgFn     | SgFn   | SgPgFn    | SgFn    |                                                      | -6                      | -4 | -2 | 0 | 2 | 4 | 6 |
| SGO_0030 | -1.462                 | 6.935                | 0.0001  | 0.0000  | 14.500   | 44.500 | 17.5111   | 44.5000 | 11.000     | 42.000 | 15.1457   | 45.2247 | aspB; aspartate transaminase                         |                         |    |    |   |   |   |   |
|          |                        |                      |         |         |          |        |           |         |            |        |           |         |                                                      |                         |    |    |   |   |   |   |
| SGO_0032 | 0.699                  | 5.805                | 0.0031  | 0.0086  | 15.500   | 9.500  | 18.7187   | 9.5000  | 11.500     | 11.000 | 15.8341   | 11.8446 | plsX; fatty acid/phospholipid synthesis protein PlsX |                         |    |    |   |   |   |   |
|          |                        |                      |         |         |          |        |           |         |            |        |           |         |                                                      |                         |    |    |   |   |   |   |
| SGO_0042 | -0.675                 | 4.801                | 0.0136  | 0.0616  | 5.500    | 11.000 | 6.6421    | 11.0000 |            |        |           | 10.2294 | transcription regulator, GntR family                 |                         |    |    |   |   |   |   |
|          |                        |                      |         |         |          |        |           |         |            |        |           |         |                                                      |                         |    |    |   |   |   |   |
| SGO_0054 | -2.242                 | 7.201                | 0.0001  | 0.0000  | 11.000   | 59.000 | 13.2843   | 59.0000 | 9.000      | 58.000 | 12.3919   | 62.4532 | dltA; D-alanine-activating enzyme                    |                         |    |    |   |   |   |   |
|          |                        |                      |         |         |          |        |           |         |            |        |           |         |                                                      |                         |    |    |   |   |   |   |
| SGO_0057 | -0.596                 | 5.653                | 0.0078  | 0.0291  | 8.500    | 17.500 | 10.2651   | 17.5000 | 7.000      | 12.000 | 9.6382    | 12.9214 | dltD protein                                         |                         |    |    |   |   |   |   |
|          |                        |                      |         |         |          |        |           |         |            |        |           |         |                                                      |                         |    |    |   |   |   |   |
| SGO_0059 | 4.484                  | 11.789               | 0.0004  | 0.0002  | 1304.000 | 93.500 | 1574.7891 | 93.5000 | 1313.500   | 56.500 | 1808.5350 | 60.8380 | pXO1; hypothetical protein SGO_0059                  |                         |    |    |   |   |   |   |
|          |                        |                      |         |         |          |        |           |         |            |        |           |         |                                                      |                         |    |    |   |   |   |   |
| SGO_0063 | 0.350                  | 5.597                | 0.0071  | 0.0258  | 11.000   | 9.500  | 13.2843   | 9.5000  | 10.000     | 11.000 | 13.7688   | 11.8446 | hypothetical protein SGO_0063                        |                         |    |    |   |   |   |   |
|          |                        |                      |         |         |          |        |           |         |            |        |           |         |                                                      |                         |    |    |   |   |   |   |
| SGO_0064 | 0.296                  | 6.006                | 0.0101  | 0.0407  | 15.000   | 16.000 | 18.1149   | 16.0000 | 12.500     | 12.000 | 17.2110   | 12.9214 | FtsK/SpoIIIE family protein                          |                         |    |    |   |   |   |   |
|          |                        |                      |         |         |          |        |           |         |            |        |           |         |                                                      |                         |    |    |   |   |   |   |
| SGO_0065 | 0.118                  | 6.285                | 0.0397  | 0.2305  | 17.000   | 17.000 | 20.5302   | 17.0000 | 14.500     | 19.000 | 19.9648   | 20.4588 | hypothetical protein SGO_0065                        |                         |    |    |   |   |   |   |
|          |                        |                      |         |         |          |        |           |         |            |        |           |         |                                                      |                         |    |    |   |   |   |   |
| SGO_0066 | 1.422                  | 4.018                | 0.0352  | 0.2001  | 4.500    | 2.500  | 5.4345    | 2.5000  | 6.000      |        | 8.2613    |         | D-3-phosphoglycerate dehydrogenase, putative         |                         |    |    |   |   |   |   |
|          |                        |                      |         |         |          |        |           |         |            |        |           |         |                                                      |                         |    |    |   |   |   |   |
| SGO_0067 | 1.156                  | 4.815                | 0.0012  | 0.0019  | 7.500    | 5.000  | 9.0575    | 5.0000  | 7.500      | 3.500  | 10.3266   | 3.7687  | protein with prophage function domain                |                         |    |    |   |   |   |   |
|          |                        |                      |         |         |          |        |           |         |            |        |           |         |                                                      |                         |    |    |   |   |   |   |
| SGO_0068 | 1.033                  | 4.262                | 0.0063  | 0.0223  | 6.500    |        | 7.8498    |         | 5.500      | 3.500  | 7.5729    | 3.7687  | lipoprotein, putative                                |                         |    |    |   |   |   |   |
|          |                        |                      |         |         |          |        |           |         |            |        |           |         |                                                      |                         |    |    |   |   |   |   |

- Show detected proteins only  
 Show all proteins

Proteins found:  
584

Filter by category:

ABC Transporter

Test

Cutoff

q-Value

.005

p-Value

|             | Signif | Direction | Applies To   |
|-------------|--------|-----------|--------------|
| Red         | yes    | +         | ratios, bars |
| Yellow      | no     | n/a       | bars         |
| Green       | yes    | -         | ratios, bars |
| Pink        | yes    | +         | p-, q-Values |
| Light Green | yes    | -         | p-, q-Values |

Dot Plots Dot Plots

Summary Table

SgFn vs Sg

SgPg vs Sg

SgPgFn vs Sg

SgPg vs SgFn

SgPgFn vs SgFn

SgPgFn vs SgPg

Coverage

SgPgFn vs SgFn

Raw

Normalized

Log<sub>2</sub> Ratios

| Protein  | SgPgFn vs SgFn         |                      |         |         | Raw     |         |          |          | Normalized |         |          |          | Description                                    | Log <sub>2</sub> Ratios |    |    |   |   |   |
|----------|------------------------|----------------------|---------|---------|---------|---------|----------|----------|------------|---------|----------|----------|------------------------------------------------|-------------------------|----|----|---|---|---|
|          | Log <sub>2</sub> Ratio | Log <sub>2</sub> Sum | q-Value | p-Value | SgPgFn  | SgFn    | SgPgFn   | SgFn     | SgPgFn     | SgFn    | SgPgFn   | SgFn     |                                                | -6                      | -4 | -2 | 0 | 2 | 4 |
| SGO_0080 | 0.548                  | 5.745                | 0.0105  | 0.0445  | 13.000  | 13.500  | 15.6996  | 13.5000  | 11.500     | 8.000   | 15.8341  | 8.6142   | hypothetical protein SGO_0080                  |                         |    |    |   |   |   |
|          |                        |                      |         |         |         |         |          |          |            |         |          |          |                                                |                         |    |    |   |   |   |
| SGO_0099 | -0.792                 | 3.575                | 0.0732  | 0.4882  | 2.000   | 2.500   | 2.4153   | 2.5000   |            | 6.500   |          | 6.9991   | pula-2; pullulanase, type I                    |                         |    |    |   |   |   |
|          |                        |                      |         |         |         |         |          |          |            |         |          |          |                                                |                         |    |    |   |   |   |
| SGO_0104 | -0.282                 | 8.448                | 0.0219  | 0.1109  | 60.000  | 108.000 | 72.4596  | 108.0000 | 61.500     | 78.000  | 84.6783  | 83.9888  | Maltose/maltodextrin-binding protein precursor |                         |    |    |   |   |   |
|          |                        |                      |         |         |         |         |          |          |            |         |          |          |                                                |                         |    |    |   |   |   |
| SGO_0105 | -1.140                 | 5.228                | 0.0045  | 0.0140  | 4.000   | 15.000  | 4.8306   | 15.0000  | 5.000      | 10.000  | 6.8844   | 10.7678  | malQ; 4-alpha-glucanotransferase               |                         |    |    |   |   |   |
|          |                        |                      |         |         |         |         |          |          |            |         |          |          |                                                |                         |    |    |   |   |   |
| SGO_0106 | -0.925                 | 7.869                | 0.0018  | 0.0039  | 33.500  | 84.500  | 40.4566  | 84.5000  | 29.000     | 64.000  | 39.9296  | 68.9139  | glgP-2; maltodextrin phosphorylase             |                         |    |    |   |   |   |
|          |                        |                      |         |         |         |         |          |          |            |         |          |          |                                                |                         |    |    |   |   |   |
| SGO_0113 | 0.441                  | 10.731               | 0.0011  | 0.0015  | 416.500 | 375.000 | 502.9905 | 375.0000 | 345.500    | 321.500 | 475.7129 | 346.1846 | acdH; alcohol-acetaldehyde dehydrogenase       |                         |    |    |   |   |   |
|          |                        |                      |         |         |         |         |          |          |            |         |          |          |                                                |                         |    |    |   |   |   |
| SGO_0135 | -1.269                 | 6.698                | 0.0026  | 0.0068  | 10.500  | 41.500  | 12.6804  | 41.5000  | 13.000     | 29.500  | 17.8995  | 31.7650  | v-type sodium ATP synthase, subunit A          |                         |    |    |   |   |   |
|          |                        |                      |         |         |         |         |          |          |            |         |          |          |                                                |                         |    |    |   |   |   |
| SGO_0136 | -0.904                 | 6.696                | 0.0022  | 0.0052  | 12.500  | 35.500  | 15.0958  | 35.5000  | 15.500     | 29.500  | 21.3417  | 31.7650  | v-type sodium ATP synthase, chain B            |                         |    |    |   |   |   |
|          |                        |                      |         |         |         |         |          |          |            |         |          |          |                                                |                         |    |    |   |   |   |
| SGO_0139 | -1.017                 | 6.088                | 0.0023  | 0.0056  | 11.500  | 21.500  | 13.8881  | 21.5000  | 6.500      | 22.000  | 8.9497   | 23.6891  | thrC; threonine synthase                       |                         |    |    |   |   |   |
|          |                        |                      |         |         |         |         |          |          |            |         |          |          |                                                |                         |    |    |   |   |   |
| SGO_0145 | -1.124                 | 6.669                | 0.0048  | 0.0153  | 12.000  | 41.500  | 14.4919  | 41.5000  | 12.500     | 26.500  | 17.2110  | 28.5347  | polI; DNA polymerase I                         |                         |    |    |   |   |   |
|          |                        |                      |         |         |         |         |          |          |            |         |          |          |                                                |                         |    |    |   |   |   |
| SGO_0146 | -0.812                 | 5.412                | 0.0355  | 0.2024  | 10.500  | 15.000  | 12.6804  | 15.0000  | 3.000      | 10.000  | 4.1306   | 10.7678  | CoA-binding domain protein                     |                         |    |    |   |   |   |
|          |                        |                      |         |         |         |         |          |          |            |         |          |          |                                                |                         |    |    |   |   |   |
| SGO_0152 | -0.818                 | 4.490                | 0.0268  | 0.1420  | 3.500   | 10.500  | 4.2268   | 10.5000  | 2.500      | 4.000   | 3.4422   | 4.3071   | tgt; queuine tRNA-ribosyltransferase           |                         |    |    |   |   |   |
|          |                        |                      |         |         |         |         |          |          |            |         |          |          |                                                |                         |    |    |   |   |   |

- Show detected proteins only  
 Show all proteins

Proteins found:  
584

Filter by category:

ABC Transporter

Test

Cutoff

q-Value

.005

p-Value

|             | Signif | Direction | Applies To   |
|-------------|--------|-----------|--------------|
| Red         | yes    | +         | ratios, bars |
| Yellow      | no     | n/a       | bars         |
| Green       | yes    | -         | ratios, bars |
| Pink        | yes    | +         | p-, q-Values |
| Light Green | yes    | -         | p-, q-Values |

Dot Plots Dot Plots

Summary Table

SgFn vs Sg

SgPg vs Sg

SgPgFn vs Sg

SgPg vs SgFn

SgPgFn vs SgFn

SgPgFn vs SgPg

Coverage

SgPgFn vs SgFn

Raw

Normalized

Log<sub>2</sub> Ratios

| Protein  | SgPgFn vs SgFn         |                      |         |         | Raw     |         | Normalized |          | Description                                                                                         | Log <sub>2</sub> Ratios |    |    |   |   |
|----------|------------------------|----------------------|---------|---------|---------|---------|------------|----------|-----------------------------------------------------------------------------------------------------|-------------------------|----|----|---|---|
|          | Log <sub>2</sub> Ratio | Log <sub>2</sub> Sum | q-Value | p-Value | SgPgFn  | SgFn    | SgPgFn     | SgFn     |                                                                                                     | -6                      | -4 | -2 | 0 | 2 |
| SGO_0154 | -0.961                 | 10.418               | 0.0014  | 0.0025  | 193.000 | 493.000 | 233.0784   | 493.0000 | pgi; glucose-6-phosphate isomerase                                                                  |                         |    |    |   |   |
|          |                        |                      |         |         | 167.000 | 382.500 | 229.9394   | 411.8681 |                                                                                                     |                         |    |    |   |   |
| SGO_0158 | -0.969                 | 7.832                | 0.0020  | 0.0047  | 37.500  | 70.000  | 45.2873    | 70.0000  | 2,3,4,5-tetrahydropyridine-2-carboxylate N-succinyltransferase, putative                            |                         |    |    |   |   |
|          |                        |                      |         |         | 23.500  | 74.500  | 32.3567    | 80.2201  |                                                                                                     |                         |    |    |   |   |
| SGO_0163 | -0.555                 | 6.398                | 0.0013  | 0.0022  | 14.000  | 26.500  | 16.9072    | 26.5000  | galU; UTP-glucose-1-phosphate uridylyltransferase                                                   |                         |    |    |   |   |
|          |                        |                      |         |         | 12.500  | 22.000  | 17.2110    | 23.6891  |                                                                                                     |                         |    |    |   |   |
| SGO_0164 | -0.821                 | 6.303                | 0.0038  | 0.0111  | 11.000  | 22.000  | 13.2843    | 22.0000  | Glycerol-3-phosphate dehydrogenase [NAD(P)+] (NAD(P)H-dependent glycerol-3-phosphate dehydrogenase) |                         |    |    |   |   |
|          |                        |                      |         |         | 11.000  | 26.500  | 15.1457    | 28.5347  |                                                                                                     |                         |    |    |   |   |
| SGO_0169 | -1.283                 | 5.622                | 0.0033  | 0.0094  | 5.500   | 20.500  | 6.6421     | 20.5000  | dut; dUTP diphosphatase                                                                             |                         |    |    |   |   |
|          |                        |                      |         |         | 5.500   | 13.500  | 7.5729     | 14.5365  |                                                                                                     |                         |    |    |   |   |
| SGO_0171 | -0.576                 | 2.911                |         |         | 2.500   | 4.500   | 3.0192     | 4.5000   | radA; DNA repair protein RadA                                                                       |                         |    |    |   |   |
| SGO_0174 | -0.073                 | 7.627                | 0.0875  | 0.6035  | 37.000  | 60.000  | 44.6834    | 60.0000  | gltX; glutamyl-tRNA synthetase                                                                      |                         |    |    |   |   |
|          |                        |                      |         |         | 37.000  | 39.000  | 50.9446    | 41.9944  |                                                                                                     |                         |    |    |   |   |
| SGO_0180 | -0.177                 | 4.949                | 0.1287  | 0.9284  | 3.500   | 6.500   | 4.2268     | 6.5000   | jag; hypothetical protein SGO_0180                                                                  |                         |    |    |   |   |
|          |                        |                      |         |         | 8.000   | 8.500   | 11.0151    | 9.1526   |                                                                                                     |                         |    |    |   |   |
| SGO_0197 | -0.253                 | 3.809                | 0.0515  | 0.3175  |         | 4.500   |            | 4.5000   | predicted ribosome small subunit-dependent GTPase A                                                 |                         |    |    |   |   |
|          |                        |                      |         |         | 3.000   | 5.000   | 4.1306     | 5.3839   |                                                                                                     |                         |    |    |   |   |
| SGO_0198 | -2.236                 | 7.405                | 0.0002  | 0.0001  | 11.000  | 67.000  | 13.2843    | 67.0000  | rpe; ribulose-phosphate 3-epimerase                                                                 |                         |    |    |   |   |
|          |                        |                      |         |         | 12.000  | 67.500  | 16.5226    | 72.6826  |                                                                                                     |                         |    |    |   |   |
| SGO_0200 | -0.337                 | 5.633                | 0.0212  | 0.1059  | 7.500   | 13.500  | 9.0575     | 13.5000  | competence-induced protein Ccs50                                                                    |                         |    |    |   |   |
|          |                        |                      |         |         | 9.500   | 13.000  | 13.0804    | 13.9981  |                                                                                                     |                         |    |    |   |   |
| SGO_0201 | -2.387                 | 6.927                | 0.0016  | 0.0032  | 7.000   | 43.000  | 8.4536     | 43.0000  | cmp-binding-factor 1                                                                                |                         |    |    |   |   |
|          |                        |                      |         |         | 8.000   | 55.000  | 11.0151    | 59.2229  |                                                                                                     |                         |    |    |   |   |

- Show detected proteins only  
 Show all proteins

Proteins found:  
584

Filter by category:

ABC Transporter

Test

Cutoff

q-Value

.005

p-Value

|             | Signif | Direction | Applies To   |
|-------------|--------|-----------|--------------|
| Red         | yes    | +         | ratios, bars |
| Yellow      | no     | n/a       | bars         |
| Green       | yes    | -         | ratios, bars |
| Pink        | yes    | +         | p-, q-Values |
| Light Green | yes    | -         | p-, q-Values |

Dot Plots Dot Plots

Summary Table

SgFn vs Sg

SgPg vs Sg

SgPgFn vs Sg

SgPg vs SgFn

SgPgFn vs SgFn

SgPgFn vs SgPg

Coverage

SgPgFn vs SgFn

Raw

Normalized

Log<sub>2</sub> Ratios

| Protein  | SgPgFn vs SgFn         |                      |         |         | Raw      |          | Normalized |           | Description                                           | Log <sub>2</sub> Ratios |    |    |   |   |   |   |
|----------|------------------------|----------------------|---------|---------|----------|----------|------------|-----------|-------------------------------------------------------|-------------------------|----|----|---|---|---|---|
|          | Log <sub>2</sub> Ratio | Log <sub>2</sub> Sum | q-Value | p-Value | SgPgFn   | SgFn     | SgPgFn     | SgFn      |                                                       | -6                      | -4 | -2 | 0 | 2 | 4 | 6 |
| SGO_0204 | 0.016                  | 6.952                | 0.1239  | 0.8855  | 25.000   | 39.500   | 30.1915    | 39.5000   | rpsL; ribosomal protein S12                           |                         |    |    |   |   |   |   |
|          |                        |                      |         |         | 22.500   | 21.500   | 30.9799    | 23.1508   |                                                       |                         |    |    |   |   |   |   |
| SGO_0205 | 0.417                  | 8.530                | 0.0214  | 0.1072  | 75.000   | 92.500   | 90.5745    | 92.5000   | rpsG; ribosomal protein S7                            |                         |    |    |   |   |   |   |
|          |                        |                      |         |         | 87.500   | 61.500   | 120.4772   | 66.2219   |                                                       |                         |    |    |   |   |   |   |
| SGO_0206 | 0.564                  | 11.617               | 0.0024  | 0.0061  | 837.000  | 652.000  | 1010.8117  | 652.0000  | fusA; translation elongation factor G                 |                         |    |    |   |   |   |   |
|          |                        |                      |         |         | 627.500  | 569.500  | 863.9937   | 613.2259  |                                                       |                         |    |    |   |   |   |   |
| SGO_0207 | 0.257                  | 12.020               | 0.0183  | 0.0872  | 830.000  | 934.000  | 1002.3581  | 934.0000  | gap; glyceraldehyde-3-phosphate dehydrogenase, type I |                         |    |    |   |   |   |   |
|          |                        |                      |         |         | 919.500  | 884.000  | 1266.0433  | 951.8731  |                                                       |                         |    |    |   |   |   |   |
| SGO_0209 | 0.252                  | 12.189               | 0.0031  | 0.0085  | 1021.000 | 1110.000 | 1233.0212  | 1110.0000 | pgk; phosphoglycerate kinase                          |                         |    |    |   |   |   |   |
|          |                        |                      |         |         | 948.000  | 949.000  | 1305.2845  | 1021.8637 |                                                       |                         |    |    |   |   |   |   |
| SGO_0215 | -0.579                 | 7.445                | 0.0059  | 0.0205  | 34.500   | 51.500   | 41.6643    | 51.5000   | glnA; glutamine synthetase, type I                    |                         |    |    |   |   |   |   |
|          |                        |                      |         |         | 21.000   | 48.500   | 28.9145    | 52.2238   |                                                       |                         |    |    |   |   |   |   |
| SGO_0219 | -0.016                 | 6.905                | 0.1133  | 0.8056  | 26.000   | 29.000   | 31.3992    | 29.0000   | metallo-beta-lactamase superfamily protein 1          |                         |    |    |   |   |   |   |
|          |                        |                      |         |         | 20.500   | 29.000   | 28.2261    | 31.2266   |                                                       |                         |    |    |   |   |   |   |
| SGO_0230 | 1.048                  | 4.788                | 0.0233  | 0.1196  | 5.000    | 6.500    | 6.0383     | 6.5000    | Protein of unknown function, DUF536 family            |                         |    |    |   |   |   |   |
|          |                        |                      |         |         | 9.000    | 2.500    | 12.3919    | 2.6919    |                                                       |                         |    |    |   |   |   |   |
| SGO_0234 | -0.964                 | 6.469                | 0.0008  | 0.0008  | 13.500   | 30.500   | 16.3034    | 30.5000   | pepX; X-Pro dipeptidyl-peptidase                      |                         |    |    |   |   |   |   |
|          |                        |                      |         |         | 10.000   | 26.000   | 13.7688    | 27.9963   |                                                       |                         |    |    |   |   |   |   |
| SGO_0237 | -0.611                 | 4.436                | 0.0348  | 0.1970  | 2.500    | 4.500    | 3.0192     | 4.5000    | ccpA; CcpA protein (proteinase)                       |                         |    |    |   |   |   |   |
|          |                        |                      |         |         | 4.000    | 8.000    | 5.5075     | 8.6142    |                                                       |                         |    |    |   |   |   |   |
| SGO_0243 | -0.226                 | 4.377                | 0.0612  | 0.3979  |          | 6.500    |            | 6.5000    | hydroxymethylglutaryl-CoA reductase, degradative      |                         |    |    |   |   |   |   |
|          |                        |                      |         |         | 4.500    | 7.500    | 6.1960     | 8.0758    |                                                       |                         |    |    |   |   |   |   |
| SGO_0244 | -0.170                 | 4.570                | 0.0834  | 0.5695  | 6.000    | 9.500    | 7.2460     | 9.5000    | hydroxymethylglutaryl-CoA synthase                    |                         |    |    |   |   |   |   |
|          |                        |                      |         |         |          | 6.500    |            | 6.9991    |                                                       |                         |    |    |   |   |   |   |

- Show detected proteins only  
 Show all proteins

Proteins found:  
584

Filter by category:

ABC Transporter

Test

Cutoff

q-Value

.005

p-Value

|             | Signif | Direction | Applies To   |
|-------------|--------|-----------|--------------|
| Red         | yes    | +         | ratios, bars |
| Yellow      | no     | n/a       | bars         |
| Green       | yes    | -         | ratios, bars |
| Pink        | yes    | +         | p-, q-Values |
| Light Green | yes    | -         | p-, q-Values |

Dot Plots Dot Plots

Summary Table

SgFn vs Sg

SgPg vs Sg

SgPgFn vs Sg

SgPg vs SgFn

SgPgFn vs SgFn

SgPgFn vs SgPg

Coverage

| Protein  | SgPgFn vs SgFn         |                      |         |         | Raw     |         | Normalized |          | Description                                  | Log <sub>2</sub> Ratios |    |    |   |   |   |   |
|----------|------------------------|----------------------|---------|---------|---------|---------|------------|----------|----------------------------------------------|-------------------------|----|----|---|---|---|---|
|          | Log <sub>2</sub> Ratio | Log <sub>2</sub> Sum | q-Value | p-Value | SgPgFn  | SgFn    | SgPgFn     | SgFn     |                                              | -6                      | -4 | -2 | 0 | 2 | 4 | 6 |
| SGO_0247 | -0.755                 | 9.779                | 0.0088  | 0.0343  | 137.000 | 223.500 | 165.4495   | 223.5000 | pfl; formate acetyltransferase               |                         |    |    |   |   |   |   |
|          |                        |                      |         |         | 114.500 | 308.500 | 157.6530   | 332.1865 |                                              |                         |    |    |   |   |   |   |
| SGO_0252 | -0.593                 | 3.619                | 0.0510  | 0.3132  | 2.500   | 5.500   | 3.0192     | 5.5000   | possible TetR-type transcriptional regulator |                         |    |    |   |   |   |   |
|          |                        |                      |         |         |         | 3.500   |            | 3.7687   |                                              |                         |    |    |   |   |   |   |
| SGO_0255 | -0.236                 | 5.062                | 0.0282  | 0.1521  | 7.000   | 10.000  | 8.4536     | 10.0000  | Signal peptidase I                           |                         |    |    |   |   |   |   |
|          |                        |                      |         |         | 5.000   | 7.500   | 6.8844     | 8.0758   |                                              |                         |    |    |   |   |   |   |
| SGO_0258 | 0.355                  | 2.880                |         |         |         |         |            |          | hypothetical protein SGO_0258                |                         |    |    |   |   |   |   |
|          |                        |                      |         |         | 3.000   | 3.000   | 4.1306     | 3.2303   |                                              |                         |    |    |   |   |   |   |
| SGO_0260 | -0.677                 | 5.083                | 0.0123  | 0.0543  | 4.500   | 8.500   | 5.4345     | 8.5000   | DNA mismatch binding protein MutS2           |                         |    |    |   |   |   |   |
|          |                        |                      |         |         | 5.500   | 11.500  | 7.5729     | 12.3830  |                                              |                         |    |    |   |   |   |   |
| SGO_0262 | -1.445                 | 5.499                | 0.0010  | 0.0014  | 5.500   | 18.000  | 6.6421     | 18.0000  | dipeptidase                                  |                         |    |    |   |   |   |   |
|          |                        |                      |         |         | 4.000   | 14.000  | 5.5075     | 15.0749  |                                              |                         |    |    |   |   |   |   |
| SGO_0263 | 1.121                  | 6.893                | 0.0087  | 0.0340  | 41.000  | 14.000  | 49.5141    | 14.0000  | trx-1; thioredoxin                           |                         |    |    |   |   |   |   |
|          |                        |                      |         |         | 23.000  | 22.000  | 31.6683    | 23.6891  |                                              |                         |    |    |   |   |   |   |
| SGO_0272 | 0.001                  | 5.530                | 0.1304  | 0.9477  | 10.500  | 13.500  | 12.6804    | 13.5000  | hypothetical protein SGO_0272                |                         |    |    |   |   |   |   |
|          |                        |                      |         |         | 7.500   | 9.000   | 10.3266    | 9.6910   |                                              |                         |    |    |   |   |   |   |
| SGO_0276 | -0.258                 | 8.496                | 0.0206  | 0.1025  | 62.500  | 108.500 | 75.4788    | 108.5000 | gdhA; glutamate dehydrogenase (NADP)         |                         |    |    |   |   |   |   |
|          |                        |                      |         |         | 64.500  | 82.000  | 88.8089    | 88.2959  |                                              |                         |    |    |   |   |   |   |
| SGO_0286 | -0.453                 | 2.705                |         |         |         |         |            |          | DNA mismatch repair protein MutS, putative   |                         |    |    |   |   |   |   |
|          |                        |                      |         |         | 2.000   | 3.500   | 2.7538     | 3.7687   |                                              |                         |    |    |   |   |   |   |
| SGO_0291 | -0.587                 | 5.151                | 0.0046  | 0.0146  | 5.000   | 11.000  | 6.0383     | 11.0000  | copper-translocating P-type ATPase           |                         |    |    |   |   |   |   |
|          |                        |                      |         |         | 6.000   | 9.500   | 8.2613     | 10.2294  |                                              |                         |    |    |   |   |   |   |
| SGO_0292 | 2.555                  | 7.814                | 0.0003  | 0.0001  | 84.000  | 15.500  | 101.4435   | 15.5000  | spxB; pyruvate oxidase                       |                         |    |    |   |   |   |   |
|          |                        |                      |         |         | 66.000  | 16.000  | 90.8742    | 17.2285  |                                              |                         |    |    |   |   |   |   |

- Show detected proteins only
- Show all proteins

Proteins found: 584

Filter by category:

ABC Transporter

Test

Cutoff

q-Value

.005

p-Value

|             | Signif | Direction | Applies To   |
|-------------|--------|-----------|--------------|
| Red         | yes    | +         | ratios, bars |
| Yellow      | no     | n/a       | bars         |
| Green       | yes    | -         | ratios, bars |
| Pink        | yes    | +         | p-, q-Values |
| Light Green | yes    | -         | p-, q-Values |

Dot Plots Dot Plots

Summary Table

SgFn vs Sg

SgPg vs Sg

SgPgFn vs Sg

SgPg vs SgFn

SgPgFn vs SgFn

SgPgFn vs SgPg

Coverage

SgPgFn vs SgFn

Raw

Normalized

Log<sub>2</sub> Ratios

| Protein  | SgPgFn vs SgFn         |                      |         |         | Raw     |         |          |          | Normalized |         |          |          | Description                                                        | Log <sub>2</sub> Ratios |    |    |   |   |   |
|----------|------------------------|----------------------|---------|---------|---------|---------|----------|----------|------------|---------|----------|----------|--------------------------------------------------------------------|-------------------------|----|----|---|---|---|
|          | Log <sub>2</sub> Ratio | Log <sub>2</sub> Sum | q-Value | p-Value | SgPgFn  | SgFn    | SgPgFn   | SgFn     | SgPgFn     | SgFn    | SgPgFn   | SgFn     |                                                                    | -6                      | -4 | -2 | 0 | 2 | 4 |
| SGO_0312 | -0.222                 | 10.630               | 0.0039  | 0.0115  | 309.000 | 444.000 | 373.1670 | 444.0000 | 260.000    | 380.000 | 357.9894 | 409.1762 | xfp; D-xylulose 5-phosphate/D-fructose 6-phosphate phosphoketolase |                         |    |    |   |   |   |
|          |                        |                      |         |         |         |         |          |          |            |         |          |          |                                                                    |                         |    |    |   |   |   |
| SGO_0321 | -0.983                 | 6.071                | 0.0015  | 0.0030  | 8.000   | 23.500  | 9.6613   | 23.5000  | 9.500      | 19.500  | 13.0804  | 20.9972  | polypeptide deformylase                                            |                         |    |    |   |   |   |
|          |                        |                      |         |         |         |         |          |          |            |         |          |          |                                                                    |                         |    |    |   |   |   |
| SGO_0333 | 0.362                  | 7.225                | 0.0310  | 0.1718  | 30.000  | 39.500  | 36.2298  | 39.5000  | 34.500     | 24.500  | 47.5024  | 26.3811  | rpsO; ribosomal protein S15                                        |                         |    |    |   |   |   |
|          |                        |                      |         |         |         |         |          |          |            |         |          |          |                                                                    |                         |    |    |   |   |   |
| SGO_0342 | -0.909                 | 7.359                | 0.0009  | 0.0010  | 25.000  | 56.500  | 30.1915  | 56.5000  | 19.500     | 47.000  | 26.8492  | 50.6086  | pepF-2; oligoendopeptidase                                         |                         |    |    |   |   |   |
|          |                        |                      |         |         |         |         |          |          |            |         |          |          |                                                                    |                         |    |    |   |   |   |
| SGO_0344 | -0.313                 | 8.048                | 0.0061  | 0.0214  | 48.000  | 79.000  | 57.9677  | 79.0000  | 43.500     | 63.000  | 59.8944  | 67.8371  | pnpA; polyribonucleotide nucleotidyltransferase                    |                         |    |    |   |   |   |
|          |                        |                      |         |         |         |         |          |          |            |         |          |          |                                                                    |                         |    |    |   |   |   |
| SGO_0349 | -0.611                 | 6.029                | 0.0125  | 0.0552  | 11.500  | 16.000  | 13.8881  | 16.0000  | 8.500      | 22.000  | 11.7035  | 23.6891  | cysS; cysteinyl-tRNA synthetase                                    |                         |    |    |   |   |   |
|          |                        |                      |         |         |         |         |          |          |            |         |          |          |                                                                    |                         |    |    |   |   |   |
| SGO_0352 | -0.438                 | 6.480                | 0.0007  | 0.0007  | 16.000  | 25.000  | 19.3226  | 25.0000  | 13.500     | 24.500  | 18.5879  | 26.3811  | ABC transporter, ATP-binding protein SP1580                        |                         |    |    |   |   |   |
|          |                        |                      |         |         |         |         |          |          |            |         |          |          |                                                                    |                         |    |    |   |   |   |
| SGO_0357 | 0.214                  | 6.658                | 0.0091  | 0.0360  | 21.000  | 23.000  | 25.3609  | 23.0000  | 21.000     | 22.000  | 28.9145  | 23.6891  | degV; DegV family fatty acid binding protein                       |                         |    |    |   |   |   |
|          |                        |                      |         |         |         |         |          |          |            |         |          |          |                                                                    |                         |    |    |   |   |   |
| SGO_0358 | -0.100                 | 8.576                | 0.0520  | 0.3226  | 73.000  | 108.500 | 88.1592  | 108.5000 | 69.500     | 83.000  | 95.6933  | 89.3727  | rplM; ribosomal protein L13                                        |                         |    |    |   |   |   |
|          |                        |                      |         |         |         |         |          |          |            |         |          |          |                                                                    |                         |    |    |   |   |   |
| SGO_0359 | 0.671                  | 7.145                | 0.0101  | 0.0418  | 32.500  | 34.500  | 39.2490  | 34.5000  | 34.000     | 19.500  | 46.8140  | 20.9972  | rpsI; ribosomal protein S9                                         |                         |    |    |   |   |   |
|          |                        |                      |         |         |         |         |          |          |            |         |          |          |                                                                    |                         |    |    |   |   |   |
| SGO_0368 | -0.659                 | 3.359                | 0.0554  | 0.3497  | 2.000   | 3.000   | 2.4153   | 3.0000   |            | 4.500   |          | 4.8455   | merA; mercury(II) reductase                                        |                         |    |    |   |   |   |
|          |                        |                      |         |         |         |         |          |          |            |         |          |          |                                                                    |                         |    |    |   |   |   |
| SGO_0372 | -0.919                 | 5.539                | 0.0025  | 0.0064  | 7.000   | 17.000  | 8.4536   | 17.0000  | 5.500      | 12.500  | 7.5729   | 13.4597  | malate oxidoreductase                                              |                         |    |    |   |   |   |
|          |                        |                      |         |         |         |         |          |          |            |         |          |          |                                                                    |                         |    |    |   |   |   |

- Show detected proteins only  
 Show all proteins

Proteins found:  
584

Filter by category:

ABC Transporter

Test

Cutoff

q-Value

.005

p-Value

|             | Signif | Direction | Applies To   |
|-------------|--------|-----------|--------------|
| Red         | yes    | +         | ratios, bars |
| Yellow      | no     | n/a       | bars         |
| Green       | yes    | -         | ratios, bars |
| Pink        | yes    | +         | p-, q-Values |
| Light Green | yes    | -         | p-, q-Values |

Dot Plots Dot Plots

Summary Table

SgFn vs Sg

SgPg vs Sg

SgPgFn vs Sg

SgPg vs SgFn

SgPgFn vs SgFn

SgPgFn vs SgPg

Coverage

SgPgFn vs SgFn

Raw

Normalized

Log<sub>2</sub> Ratios

| Protein  | SgPgFn vs SgFn         |                      |         |         | Raw     |         | Normalized |          | Description                                   | Log <sub>2</sub> Ratios |    |    |   |   |
|----------|------------------------|----------------------|---------|---------|---------|---------|------------|----------|-----------------------------------------------|-------------------------|----|----|---|---|
|          | Log <sub>2</sub> Ratio | Log <sub>2</sub> Sum | q-Value | p-Value | SgPgFn  | SgFn    | SgPgFn     | SgFn     |                                               | -6                      | -4 | -2 | 0 | 2 |
| SGO_0374 | -1.862                 | 5.419                | 0.0013  | 0.0022  | 5.000   | 15.000  | 6.0383     | 15.0000  | Response regulator of the LytR/AlgR family    |                         |    |    |   |   |
|          |                        |                      |         |         | 2.500   | 17.000  | 3.4422     | 18.3053  |                                               |                         |    |    |   |   |
| SGO_0384 | 0.048                  | 4.532                | 0.1293  | 0.9361  | 4.500   | 4.500   | 5.4345     | 4.5000   | putative carboxylate-amine/thiol ligase       |                         |    |    |   |   |
|          |                        |                      |         |         | 4.500   | 6.500   | 6.1960     | 6.9991   |                                               |                         |    |    |   |   |
| SGO_0390 | -0.742                 | 7.537                | 0.0050  | 0.0165  | 27.000  | 66.500  | 32.6068    | 66.5000  | glycerol-3-phosphate dehydrogenase (NAD (P)+) |                         |    |    |   |   |
|          |                        |                      |         |         | 26.500  | 46.500  | 36.4874    | 50.0702  |                                               |                         |    |    |   |   |
| SGO_0392 | -1.550                 | 5.511                | 0.0113  | 0.0485  | 5.500   | 18.500  | 6.6421     | 18.5000  | phosphoglycerate mutase                       |                         |    |    |   |   |
|          |                        |                      |         |         |         | 19.000  |            | 20.4588  |                                               |                         |    |    |   |   |
| SGO_0398 | -0.848                 | 4.338                | 0.0119  | 0.0517  | 2.500   | 5.000   | 3.0192     | 5.0000   | ABC transporter ATP-binding protein           |                         |    |    |   |   |
|          |                        |                      |         |         | 3.000   | 7.500   | 4.1306     | 8.0758   |                                               |                         |    |    |   |   |
| SGO_0401 | 0.148                  | 6.218                | 0.0233  | 0.1210  | 17.000  | 16.500  | 20.5302    | 16.5000  | grpE; co-chaperone GrpE                       |                         |    |    |   |   |
|          |                        |                      |         |         | 13.500  | 17.500  | 18.5879    | 18.8436  |                                               |                         |    |    |   |   |
| SGO_0402 | -0.715                 | 10.656               | 0.0003  | 0.0001  | 245.000 | 492.500 | 295.8768   | 492.5000 | dnaK; DnaK chaperone protein                  |                         |    |    |   |   |
|          |                        |                      |         |         | 229.000 | 474.000 | 315.3061   | 510.3935 |                                               |                         |    |    |   |   |
| SGO_0404 | -0.451                 | 5.300                | 0.0313  | 0.1735  | 5.000   | 10.500  | 6.0383     | 10.5000  | dnaJ; DnaJ chaperone protein                  |                         |    |    |   |   |
|          |                        |                      |         |         | 8.000   | 11.000  | 11.0151    | 11.8446  |                                               |                         |    |    |   |   |
| SGO_0411 | -4.144                 | 7.766                | 0.0451  | 0.2683  | 4.500   | 61.000  | 5.4345     | 61.0000  | conserved hypothetical protein TIGR01440      |                         |    |    |   |   |
|          |                        |                      |         |         |         | 140.500 |            | 151.2875 |                                               |                         |    |    |   |   |
| SGO_0412 | 0.932                  | 10.208               | 0.0004  | 0.0003  | 328.500 | 216.500 | 396.7164   | 216.5000 | tig; trigger factor                           |                         |    |    |   |   |
|          |                        |                      |         |         | 275.000 | 177.000 | 378.6426   | 190.5900 |                                               |                         |    |    |   |   |
| SGO_0413 | -0.761                 | 6.382                | 0.0007  | 0.0007  | 12.500  | 25.000  | 15.0958    | 25.0000  | DNA-directed RNA polymerase delta chain       |                         |    |    |   |   |
|          |                        |                      |         |         | 11.500  | 25.500  | 15.8341    | 27.4579  |                                               |                         |    |    |   |   |
| SGO_0415 | -0.050                 | 8.850                | 0.0760  | 0.5089  | 89.500  | 125.500 | 108.0856   | 125.5000 | secA; preprotein translocase, SecA subunit    |                         |    |    |   |   |
|          |                        |                      |         |         | 86.000  | 101.500 | 118.4119   | 109.2931 |                                               |                         |    |    |   |   |

- Show detected proteins only  
 Show all proteins

Proteins found:  
584

Filter by category:

ABC Transporter

Test

Cutoff

q-Value

.005

p-Value

|             | Signif | Direction | Applies To   |
|-------------|--------|-----------|--------------|
| Red         | yes    | +         | ratios, bars |
| Yellow      | no     | n/a       | bars         |
| Green       | yes    | -         | ratios, bars |
| Pink        | yes    | +         | p-, q-Values |
| Light Green | yes    | -         | p-, q-Values |

Dot Plots Dot Plots



Summary Table

SgFn vs Sg

SgPg vs Sg

SgPgFn vs Sg

SgPg vs SgFn

SgPgFn vs SgFn

SgPgFn vs SgPg

Coverage

SgPgFn vs SgFn

Raw

Normalized

Log<sub>2</sub> Ratios

| Protein  | SgPgFn vs SgFn         |                      |         |         | Raw    |        | Normalized |         | Description                                          | Log <sub>2</sub> Ratios |    |    |   |   |
|----------|------------------------|----------------------|---------|---------|--------|--------|------------|---------|------------------------------------------------------|-------------------------|----|----|---|---|
|          | Log <sub>2</sub> Ratio | Log <sub>2</sub> Sum | q-Value | p-Value | SgPgFn | SgFn   | SgPgFn     | SgFn    |                                                      | -6                      | -4 | -2 | 0 | 2 |
| SGO_0416 | -1.666                 | 6.527                | 0.0009  | 0.0010  | 12.000 | 35.000 | 14.4919    | 35.0000 | phospho-2-dehydro-3-deoxyheptonate aldolase          |                         |    |    |   |   |
|          |                        |                      |         |         | 6.000  | 32.000 | 8.2613     | 34.4569 |                                                      |                         |    |    |   |   |
| SGO_0426 | -1.096                 | 4.682                | 0.0291  | 0.1586  | 4.000  | 9.000  | 4.8306     | 9.0000  | Cof family protein                                   |                         |    |    |   |   |
|          |                        |                      |         |         |        | 11.000 |            | 11.8446 |                                                      |                         |    |    |   |   |
| SGO_0427 | -1.766                 | 6.750                | 0.0009  | 0.0012  | 10.500 | 37.500 | 12.6804    | 37.5000 | universal stress protein family                      |                         |    |    |   |   |
|          |                        |                      |         |         | 8.500  | 42.500 | 11.7035    | 45.7631 |                                                      |                         |    |    |   |   |
| SGO_0429 | -0.347                 | 7.952                | 0.0016  | 0.0034  | 43.500 | 67.000 | 52.5332    | 67.0000 | aspartate transaminase                               |                         |    |    |   |   |
|          |                        |                      |         |         | 41.000 | 66.500 | 56.4522    | 71.6058 |                                                      |                         |    |    |   |   |
| SGO_0432 | 1.572                  | 5.226                | 0.0121  | 0.0526  | 14.000 |        | 16.9072    |         | entB; isochorismatase family protein                 |                         |    |    |   |   |
|          |                        |                      |         |         | 11.000 | 5.000  | 15.1457    | 5.3839  |                                                      |                         |    |    |   |   |
| SGO_0434 | -0.338                 | 5.963                | 0.0483  | 0.2909  | 13.500 | 13.000 | 16.3034    | 13.0000 | aspS-2; aspartyl-tRNA synthetase                     |                         |    |    |   |   |
|          |                        |                      |         |         | 8.000  | 20.500 | 11.0151    | 22.0740 |                                                      |                         |    |    |   |   |
| SGO_0435 | 0.120                  | 5.204                | 0.0298  | 0.1626  | 8.500  | 8.500  | 10.2651    | 8.5000  | gatC; glutamyl-tRNA(Gln) amidotransferase, C subunit |                         |    |    |   |   |
|          |                        |                      |         |         | 6.500  | 8.500  | 8.9497     | 9.1526  |                                                      |                         |    |    |   |   |
| SGO_0436 | 0.478                  | 7.708                | 0.0009  | 0.0010  | 50.000 | 46.000 | 60.3830    | 46.0000 | gatA; glutamyl-tRNA(Gln) amidotransferase, A subunit |                         |    |    |   |   |
|          |                        |                      |         |         | 44.500 | 38.500 | 61.2713    | 41.4560 |                                                      |                         |    |    |   |   |
| SGO_0437 | 0.393                  | 7.762                | 0.0355  | 0.2029  | 65.000 | 52.000 | 78.4979    | 52.0000 | gatB; glutamyl-tRNA(Gln) amidotransferase, B subunit |                         |    |    |   |   |
|          |                        |                      |         |         | 33.500 | 37.500 | 46.1256    | 40.3792 |                                                      |                         |    |    |   |   |
| SGO_0440 | -2.663                 | 6.048                | 0.0122  | 0.0534  | 4.000  | 28.500 | 4.8306     | 28.5000 | L-idoitol 2-dehydrogenase BH3949                     |                         |    |    |   |   |
|          |                        |                      |         |         |        | 30.500 |            | 32.8418 |                                                      |                         |    |    |   |   |
| SGO_0445 | -1.379                 | 5.916                | 0.0006  | 0.0005  | 6.000  | 22.500 | 7.2460     | 22.5000 | GTP-binding protein                                  |                         |    |    |   |   |
|          |                        |                      |         |         | 7.000  | 19.500 | 9.6382     | 20.9972 |                                                      |                         |    |    |   |   |
| SGO_0448 | -2.532                 | 4.521                | 0.0206  | 0.1025  | 1.500  | 12.000 | 1.8115     | 12.0000 | conserved hypothetical protein TIGR00488             |                         |    |    |   |   |
|          |                        |                      |         |         |        | 8.500  |            | 9.1526  |                                                      |                         |    |    |   |   |

- Show detected proteins only  
 Show all proteins

Proteins found:  
584

Filter by category:

ABC Transporter

Test

Cutoff

q-Value

.005

p-Value

|             | Signif | Direction | Applies To   |
|-------------|--------|-----------|--------------|
| Red         | yes    | +         | ratios, bars |
| Yellow      | no     | n/a       | bars         |
| Green       | yes    | -         | ratios, bars |
| Pink        | yes    | +         | p-, q-Values |
| Light Green | yes    | -         | p-, q-Values |

Dot Plots Dot Plots

Summary Table

SgFn vs Sg

SgPg vs Sg

SgPgFn vs Sg

SgPg vs SgFn

SgPgFn vs SgFn

SgPgFn vs SgPg

Coverage

SgPgFn vs SgFn

Raw

Normalized

Log<sub>2</sub> Ratios

| Protein  | SgPgFn vs SgFn         |                      |         |         | Raw    |         | Normalized |          | Description                                       | Log <sub>2</sub> Ratios |    |    |   |   |
|----------|------------------------|----------------------|---------|---------|--------|---------|------------|----------|---------------------------------------------------|-------------------------|----|----|---|---|
|          | Log <sub>2</sub> Ratio | Log <sub>2</sub> Sum | q-Value | p-Value | SgPgFn | SgFn    | SgPgFn     | SgFn     |                                                   | -6                      | -4 | -2 | 0 | 2 |
| SGO_0454 | -0.429                 | 6.514                | 0.0563  | 0.3573  | 10.500 | 21.000  | 12.6804    | 21.0000  | conserved hypothetical protein TIGR01033          |                         |    |    |   |   |
|          |                        |                      |         |         | 20.000 | 28.000  | 27.5376    | 30.1498  |                                                   |                         |    |    |   |   |
| SGO_0455 | 1.915                  | 3.733                | 0.0398  | 0.2313  | 3.500  | 1.500   | 4.2268     | 1.5000   | lipoprotein, putative                             |                         |    |    |   |   |
|          |                        |                      |         |         | 5.500  |         | 7.5729     |          |                                                   |                         |    |    |   |   |
| SGO_0457 | 1.458                  | 6.659                | 0.0001  | 0.0000  | 30.000 | 13.500  | 36.2298    | 13.5000  | ABC transporter, substrate-binding protein SP0148 |                         |    |    |   |   |
|          |                        |                      |         |         | 27.500 | 12.500  | 37.8643    | 13.4597  |                                                   |                         |    |    |   |   |
| SGO_0458 | 0.958                  | 8.142                | 0.0015  | 0.0029  | 74.500 | 56.500  | 89.9707    | 56.5000  | hlpA; lipoprotein                                 |                         |    |    |   |   |
|          |                        |                      |         |         | 69.500 | 37.500  | 95.6933    | 40.3792  |                                                   |                         |    |    |   |   |
| SGO_0460 | 0.308                  | 4.801                | 0.0014  | 0.0024  | 6.500  | 6.000   | 7.8498     | 6.0000   | ABC transporter, ATP-binding protein SP0151       |                         |    |    |   |   |
|          |                        |                      |         |         | 5.500  | 6.000   | 7.5729     | 6.4607   |                                                   |                         |    |    |   |   |
| SGO_0468 | -1.669                 | 6.013                | 0.0058  | 0.0201  | 7.500  | 31.000  | 9.0575     | 31.0000  | hypothetical protein SGO_0468                     |                         |    |    |   |   |
|          |                        |                      |         |         | 4.500  | 17.000  | 6.1960     | 18.3053  |                                                   |                         |    |    |   |   |
| SGO_0476 | 2.617                  | 4.838                | 0.0082  | 0.0313  | 10.500 |         | 12.6804    |          | rhodanese family protein                          |                         |    |    |   |   |
|          |                        |                      |         |         | 10.000 | 2.000   | 13.7688    | 2.1536   |                                                   |                         |    |    |   |   |
| SGO_0480 | -5.955                 | 8.849                | 0.0388  | 0.2230  |        | 146.500 |            | 146.5000 | hypothetical protein SGO_0480                     |                         |    |    |   |   |
|          |                        |                      |         |         | 2.500  | 289.000 | 3.4422     | 311.1893 |                                                   |                         |    |    |   |   |
| SGO_0483 | 0.313                  | 5.573                | 0.0011  | 0.0015  | 11.000 | 11.000  | 13.2843    | 11.0000  | hypothetical protein SGO_0483                     |                         |    |    |   |   |
|          |                        |                      |         |         | 9.500  | 9.500   | 13.0804    | 10.2294  |                                                   |                         |    |    |   |   |
| SGO_0497 | -6.245                 | 8.111                | 0.0022  | 0.0054  | 1.500  | 138.500 | 1.8115     | 138.5000 | gtfG; glucosyltransferase G                       |                         |    |    |   |   |
|          |                        |                      |         |         |        | 126.500 |            | 136.2126 |                                                   |                         |    |    |   |   |
| SGO_0501 | 2.672                  | 5.473                | 0.0013  | 0.0023  | 17.000 |         | 20.5302    |          | Uncharacterized ACR, COG1399                      |                         |    |    |   |   |
|          |                        |                      |         |         | 15.000 | 3.000   | 20.6532    | 3.2303   |                                                   |                         |    |    |   |   |
| SGO_0502 | 0.856                  | 7.662                | 0.0028  | 0.0076  | 52.500 | 44.000  | 63.4022    | 44.0000  | floL; flotillin-like protein                      |                         |    |    |   |   |
|          |                        |                      |         |         | 48.000 | 27.000  | 66.0904    | 29.0730  |                                                   |                         |    |    |   |   |

- Show detected proteins only  
 Show all proteins

Proteins found:  
584

Filter by category:

ABC Transporter

Test

Cutoff

q-Value

.005

p-Value

|             | Signif | Direction | Applies To   |
|-------------|--------|-----------|--------------|
| Red         | yes    | +         | ratios, bars |
| Yellow      | no     | n/a       | bars         |
| Green       | yes    | -         | ratios, bars |
| Pink        | yes    | +         | p-, q-Values |
| Light Green | yes    | -         | p-, q-Values |

Dot Plots Dot Plots

Summary Table

SgFn vs Sg

SgPg vs Sg

SgPgFn vs Sg

SgPg vs SgFn

SgPgFn vs SgFn

SgPgFn vs SgPg

Coverage

SgPgFn vs SgFn

Raw

Normalized

Log<sub>2</sub> Ratios

| Protein  | SgPgFn vs SgFn         |                      |         |         | Raw     |         | Normalized |          | Description                                                   | Log <sub>2</sub> Ratios |    |    |   |   |
|----------|------------------------|----------------------|---------|---------|---------|---------|------------|----------|---------------------------------------------------------------|-------------------------|----|----|---|---|
|          | Log <sub>2</sub> Ratio | Log <sub>2</sub> Sum | q-Value | p-Value | SgPgFn  | SgFn    | SgPgFn     | SgFn     |                                                               | -6                      | -4 | -2 | 0 | 2 |
| SGO_0503 | -0.504                 | 10.811               | 0.0012  | 0.0018  | 322.000 | 545.500 | 388.8666   | 545.5000 | gnd; 6-phosphogluconate dehydrogenase, decarboxylating        |                         |    |    |   |   |
|          |                        |                      |         |         | 257.500 | 472.000 | 354.5472   | 508.2399 |                                                               |                         |    |    |   |   |
| SGO_0505 | -0.169                 | 7.069                | 0.0565  | 0.3604  | 24.000  | 42.500  | 28.9838    | 42.5000  | PTS system, IIBC component                                    |                         |    |    |   |   |
|          |                        |                      |         |         | 24.500  | 27.000  | 33.7336    | 29.0730  |                                                               |                         |    |    |   |   |
| SGO_0508 | 0.116                  | 4.756                | 0.0856  | 0.5856  | 8.500   | 8.500   | 10.2651    | 8.5000   | nrdR; transcriptional regulator, NrdR family                  |                         |    |    |   |   |
|          |                        |                      |         |         | 6.000   |         | 8.2613     |          |                                                               |                         |    |    |   |   |
| SGO_0510 | -0.169                 | 5.157                | 0.0612  | 0.3971  | 7.500   | 11.500  | 9.0575     | 11.5000  | dnaI; primosomal protein DnaI                                 |                         |    |    |   |   |
|          |                        |                      |         |         | 5.500   | 7.000   | 7.5729     | 7.5375   |                                                               |                         |    |    |   |   |
| SGO_0511 | -1.090                 | 4.703                | 0.0072  | 0.0263  | 4.000   | 7.000   | 4.8306     | 7.0000   | NADPH-flavin oxidoreductase -like protein                     |                         |    |    |   |   |
|          |                        |                      |         |         | 2.500   | 10.000  | 3.4422     | 10.7678  |                                                               |                         |    |    |   |   |
| SGO_0512 | 0.571                  | 7.105                | 0.0060  | 0.0210  | 38.000  | 30.000  | 45.8911    | 30.0000  | GTP-binding protein engA                                      |                         |    |    |   |   |
|          |                        |                      |         |         | 26.500  | 23.500  | 36.4874    | 25.3043  |                                                               |                         |    |    |   |   |
| SGO_0515 | -0.122                 | 7.853                | 0.0635  | 0.4155  | 40.500  | 66.000  | 48.9102    | 66.0000  | murC; UDP-N-acetylmuramate--alanine ligase                    |                         |    |    |   |   |
|          |                        |                      |         |         | 45.000  | 50.500  | 61.9597    | 54.3774  |                                                               |                         |    |    |   |   |
| SGO_0518 | 1.104                  | 6.297                | 0.0015  | 0.0027  | 20.000  | 12.500  | 24.1532    | 12.5000  | aminodeoxychorismate lyase-like protein                       |                         |    |    |   |   |
|          |                        |                      |         |         | 21.500  | 11.500  | 29.6030    | 12.3830  |                                                               |                         |    |    |   |   |
| SGO_0519 | 0.127                  | 6.121                | 0.0722  | 0.4804  | 14.500  | 19.500  | 17.5111    | 19.5000  | greA; transcription elongation factor greA                    |                         |    |    |   |   |
|          |                        |                      |         |         | 13.500  | 13.000  | 18.5879    | 13.9981  |                                                               |                         |    |    |   |   |
| SGO_0526 | -1.156                 | 4.798                | 0.0101  | 0.0413  | 3.000   | 7.000   | 3.6230     | 7.0000   | ilvB; acetolactate synthase, large subunit, biosynthetic type |                         |    |    |   |   |
|          |                        |                      |         |         | 3.500   | 11.500  | 4.8191     | 12.3830  |                                                               |                         |    |    |   |   |
| SGO_0527 | -1.592                 | 3.861                | 0.0089  | 0.0352  |         | 6.000   |            | 6.0000   | ilvN; acetolactate synthase, small subunit                    |                         |    |    |   |   |
|          |                        |                      |         |         | 1.500   | 6.000   | 2.0653     | 6.4607   |                                                               |                         |    |    |   |   |
| SGO_0528 | -0.734                 | 7.797                | 0.0048  | 0.0157  | 39.000  | 77.500  | 47.0988    | 77.5000  | ilvC; ketol-acid reductoisomerase                             |                         |    |    |   |   |
|          |                        |                      |         |         | 26.500  | 57.000  | 36.4874    | 61.3764  |                                                               |                         |    |    |   |   |

- Show detected proteins only  
 Show all proteins

Proteins found:  
584

Filter by category:

ABC Transporter

Test

Cutoff

q-Value

.005

p-Value

|             | Signif | Direction | Applies To   |
|-------------|--------|-----------|--------------|
| Red         | yes    | +         | ratios, bars |
| Yellow      | no     | n/a       | bars         |
| Green       | yes    | -         | ratios, bars |
| Pink        | yes    | +         | p-, q-Values |
| Light Green | yes    | -         | p-, q-Values |

Dot Plots Dot Plots

Summary Table

SgFn vs Sg

SgPg vs Sg

SgPgFn vs Sg

SgPg vs SgFn

SgPgFn vs SgFn

SgPgFn vs SgPg

Coverage

SgPgFn vs SgFn

Raw

Normalized

Log<sub>2</sub> Ratios

| Protein  | SgPgFn vs SgFn         |                      |         |         | Raw    |        | Normalized |          | Description                                             | Log <sub>2</sub> Ratios |    |    |   |   |   |   |
|----------|------------------------|----------------------|---------|---------|--------|--------|------------|----------|---------------------------------------------------------|-------------------------|----|----|---|---|---|---|
|          | Log <sub>2</sub> Ratio | Log <sub>2</sub> Sum | q-Value | p-Value | SgPgFn | SgFn   | SgPgFn     | SgFn     |                                                         | -6                      | -4 | -2 | 0 | 2 | 4 | 6 |
| SGO_0529 | -0.759                 | 3.952                | 0.0542  | 0.3391  |        | 4.500  |            | 4.5000   | ilvA; threonine dehydratase                             |                         |    |    |   |   |   |   |
|          |                        |                      |         |         | 2.500  | 7.000  | 3.4422     | 7.5375   |                                                         |                         |    |    |   |   |   |   |
| SGO_0535 | -0.143                 | 2.930                |         |         |        | 3.000  |            | 4.0000   | putative transcriptional regulator LytR                 |                         |    |    |   |   |   |   |
|          |                        |                      |         |         |        |        |            |          |                                                         |                         |    |    |   |   |   |   |
| SGO_0537 | -0.564                 | 5.678                | 0.0016  | 0.0033  |        | 8.000  |            | 16.0000  | HIT family protein                                      |                         |    |    |   |   |   |   |
|          |                        |                      |         |         | 8.000  | 13.500 | 11.0151    | 14.5365  |                                                         |                         |    |    |   |   |   |   |
| SGO_0540 | -1.234                 | 6.659                | 0.0004  | 0.0002  |        | 13.000 |            | 37.0000  | hypothetical protein SGO_0540                           |                         |    |    |   |   |   |   |
|          |                        |                      |         |         | 10.500 | 31.500 | 14.4573    | 33.9186  |                                                         |                         |    |    |   |   |   |   |
| SGO_0543 | 0.752                  | 6.151                | 0.0016  | 0.0032  |        | 17.000 |            | 13.5000  | nusA; transcription termination factor NusA             |                         |    |    |   |   |   |   |
|          |                        |                      |         |         | 17.500 | 12.000 | 24.0954    | 12.9214  |                                                         |                         |    |    |   |   |   |   |
| SGO_0546 | -0.168                 | 7.401                | 0.0612  | 0.3987  |        | 27.500 |            | 40.5000  | infB; Translation initiation factor IF-2                |                         |    |    |   |   |   |   |
|          |                        |                      |         |         | 34.000 | 45.000 | 46.8140    | 48.4551  |                                                         |                         |    |    |   |   |   |   |
| SGO_0548 | 0.714                  | 3.205                | 0.0101  | 0.0417  |        | 3.000  |            | 3.6230   | Na/Pi-cotransporter family protein                      |                         |    |    |   |   |   |   |
|          |                        |                      |         |         | 2.500  | 2.000  | 3.4422     | 2.1536   |                                                         |                         |    |    |   |   |   |   |
| SGO_0552 | -0.957                 | 6.345                | 0.0017  | 0.0037  |        | 12.000 |            | 29.5000  | oxidoreductase, aldo/keto reductase family              |                         |    |    |   |   |   |   |
|          |                        |                      |         |         | 9.500  | 22.500 | 13.0804    | 24.2275  |                                                         |                         |    |    |   |   |   |   |
| SGO_0554 | -1.725                 | 5.015                | 0.0204  | 0.1000  |        | 3.500  |            | 12.5000  | hsdR; type I site-specific deoxyribonuclease            |                         |    |    |   |   |   |   |
|          |                        |                      |         |         |        |        |            | 15.6133  |                                                         |                         |    |    |   |   |   |   |
| SGO_0558 | -0.230                 | 2.581                |         |         |        |        |            |          | hypothetical protein SGO_0558                           |                         |    |    |   |   |   |   |
|          |                        |                      |         |         | 2.000  | 3.000  | 2.7538     | 3.2303   |                                                         |                         |    |    |   |   |   |   |
| SGO_0560 | 1.553                  | 3.483                | 0.0247  | 0.1292  |        | 4.500  |            | 5.4345   | hsdM; type I restriction-modification system, M subunit |                         |    |    |   |   |   |   |
|          |                        |                      |         |         | 3.000  | 1.500  | 4.1306     | 1.6152   |                                                         |                         |    |    |   |   |   |   |
| SGO_0565 | -2.000                 | 8.171                | 0.0010  | 0.0013  |        | 23.000 |            | 128.0000 | adhA; alcohol dehydrogenase                             |                         |    |    |   |   |   |   |
|          |                        |                      |         |         | 21.500 | 95.500 | 29.6030    | 102.8324 |                                                         |                         |    |    |   |   |   |   |

- Show detected proteins only  
 Show all proteins

Proteins found:  
584

Filter by category:

ABC Transporter

Test

Cutoff

q-Value

.005

p-Value

|             | Signif | Direction | Applies To   |
|-------------|--------|-----------|--------------|
| Red         | yes    | +         | ratios, bars |
| Yellow      | no     | n/a       | bars         |
| Green       | yes    | -         | ratios, bars |
| Pink        | yes    | +         | p-, q-Values |
| Light Green | yes    | -         | p-, q-Values |

Dot Plots

Dot Plots

Summary Table

SgFn vs Sg

SgPg vs Sg

SgPgFn vs Sg

SgPg vs SgFn

SgPgFn vs SgFn

SgPgFn vs SgPg

Coverage

SgPgFn vs SgFn

Raw

Normalized

Log<sub>2</sub> Ratios

| Protein  | SgPgFn vs SgFn         |                      |         |         | Raw    |        | Normalized |         | Description                                    | Log <sub>2</sub> Ratios |    |    |   |   |
|----------|------------------------|----------------------|---------|---------|--------|--------|------------|---------|------------------------------------------------|-------------------------|----|----|---|---|
|          | Log <sub>2</sub> Ratio | Log <sub>2</sub> Sum | q-Value | p-Value | SgPgFn | SgFn   | SgPgFn     | SgFn    |                                                | -6                      | -4 | -2 | 0 | 2 |
| SGO_0568 | 1.101                  | 5.369                | 0.0073  | 0.0268  | 9.500  | 8.500  | 11.4728    | 8.5000  | glyQ; glycyl-tRNA synthetase, alpha subunit    |                         |    |    |   |   |
|          |                        |                      |         |         | 12.000 | 4.500  | 16.5226    | 4.8455  |                                                |                         |    |    |   |   |
| SGO_0569 | -0.089                 | 7.432                | 0.1037  | 0.7297  | 28.000 | 38.000 | 33.8145    | 38.0000 | glyS; glycyl-tRNA synthetase, beta subunit     |                         |    |    |   |   |
|          |                        |                      |         |         | 36.500 | 47.000 | 50.2562    | 50.6086 |                                                |                         |    |    |   |   |
| SGO_0573 | -1.254                 | 5.136                | 0.0101  | 0.0414  | 3.000  | 15.500 | 3.6230     | 15.5000 | mraW; S-adenosyl-methyltransferase MraW        |                         |    |    |   |   |
|          |                        |                      |         |         | 5.000  | 8.500  | 6.8844     | 9.1526  |                                                |                         |    |    |   |   |
| SGO_0577 | 0.202                  | 5.854                | 0.0868  | 0.5957  | 10.000 | 17.500 | 12.0766    | 17.5000 | ATP-dependent RNA helicase                     |                         |    |    |   |   |
|          |                        |                      |         |         | 13.500 | 9.000  | 18.5879    | 9.6910  |                                                |                         |    |    |   |   |
| SGO_0581 | 0.265                  | 4.348                | 0.0563  | 0.3569  | 4.500  | 3.500  | 5.4345     | 3.5000  | trxB; thioredoxin-disulfide reductase          |                         |    |    |   |   |
|          |                        |                      |         |         | 4.000  | 5.500  | 5.5075     | 5.9223  |                                                |                         |    |    |   |   |
| SGO_0582 | -2.174                 | 7.897                | 0.0002  | 0.0001  | 21.500 | 96.000 | 25.9647    | 96.0000 | nicotinate phosphoribosyltransferase, putative |                         |    |    |   |   |
|          |                        |                      |         |         | 13.000 | 91.500 | 17.8995    | 98.5253 |                                                |                         |    |    |   |   |
| SGO_0583 | -1.580                 | 5.703                | 0.0027  | 0.0071  | 5.000  | 23.000 | 6.0383     | 23.0000 | nadE; NAD+ synthetase                          |                         |    |    |   |   |
|          |                        |                      |         |         | 5.000  | 15.000 | 6.8844     | 16.1517 |                                                |                         |    |    |   |   |
| SGO_0585 | -2.349                 | 7.628                | 0.0004  | 0.0002  | 15.000 | 77.500 | 18.1149    | 77.5000 | pepC; aminopeptidase C                         |                         |    |    |   |   |
|          |                        |                      |         |         | 10.500 | 81.500 | 14.4573    | 87.7575 |                                                |                         |    |    |   |   |
| SGO_0586 | -0.188                 | 6.424                | 0.0303  | 0.1667  | 15.500 | 20.500 | 18.7187    | 20.5000 | pbp1a; penicillin-binding protein 1A           |                         |    |    |   |   |
|          |                        |                      |         |         | 15.500 | 23.500 | 21.3417    | 25.3043 |                                                |                         |    |    |   |   |
| SGO_0589 | -0.835                 | 6.970                | 0.0101  | 0.0417  | 21.000 | 49.000 | 25.3609    | 49.0000 | methylase                                      |                         |    |    |   |   |
|          |                        |                      |         |         | 14.000 | 29.500 | 19.2764    | 31.7650 |                                                |                         |    |    |   |   |
| SGO_0590 | -1.470                 | 4.571                | 0.0188  | 0.0905  | 3.000  | 11.000 | 3.6230     | 11.0000 | Methyltransferase                              |                         |    |    |   |   |
|          |                        |                      |         |         |        | 8.500  |            | 9.1526  |                                                |                         |    |    |   |   |
| SGO_0591 | -0.626                 | 5.925                | 0.0013  | 0.0021  | 9.000  | 18.500 | 10.8689    | 18.5000 | hypothetical protein SGO_0591                  |                         |    |    |   |   |
|          |                        |                      |         |         | 9.500  | 17.000 | 13.0804    | 18.3053 |                                                |                         |    |    |   |   |

- Show detected proteins only  
 Show all proteins

Proteins found:  
584

Filter by category:

ABC Transporter

Test

Cutoff

q-Value

.005

p-Value

|             | Signif | Direction | Applies To   |
|-------------|--------|-----------|--------------|
| Red         | yes    | +         | ratios, bars |
| Yellow      | no     | n/a       | bars         |
| Green       | yes    | -         | ratios, bars |
| Pink        | yes    | +         | p-, q-Values |
| Light Green | yes    | -         | p-, q-Values |

Dot Plots Dot Plots

Summary Table

SgFn vs Sg

SgPg vs Sg

SgPgFn vs Sg

SgPg vs SgFn

SgPgFn vs SgFn

SgPgFn vs SgPg

Coverage

SgPgFn vs SgFn

Raw

Normalized

Log<sub>2</sub> Ratios

| Protein  | SgPgFn vs SgFn         |                      |         |         | Raw    |        | Normalized |         | Description                                                                                   | Log <sub>2</sub> Ratios |    |    |   |   |
|----------|------------------------|----------------------|---------|---------|--------|--------|------------|---------|-----------------------------------------------------------------------------------------------|-------------------------|----|----|---|---|
|          | Log <sub>2</sub> Ratio | Log <sub>2</sub> Sum | q-Value | p-Value | SgPgFn | SgFn   | SgPgFn     | SgFn    |                                                                                               | -6                      | -4 | -2 | 0 | 2 |
| SGO_0592 | -0.527                 | 4.232                | 0.0281  | 0.1510  | 4.000  | 7.500  | 4.8306     | 7.5000  | luxS; autoinducer-2 production protein LuxS                                                   |                         |    |    |   |   |
|          |                        |                      |         |         |        | 6.000  |            | 6.4607  |                                                                                               |                         |    |    |   |   |
| SGO_0593 | 0.245                  | 5.513                | 0.0449  | 0.2657  | 12.000 | 9.000  | 14.4919    | 9.0000  | HD/KH domain protein                                                                          |                         |    |    |   |   |
|          |                        |                      |         |         | 7.500  | 11.000 | 10.3266    | 11.8446 |                                                                                               |                         |    |    |   |   |
| SGO_0594 | -0.918                 | 5.361                | 0.0014  | 0.0025  | 5.500  | 14.500 | 6.6421     | 14.5000 | gmk; Guanylate kinase (GMP kinase)                                                            |                         |    |    |   |   |
|          |                        |                      |         |         | 5.500  | 11.500 | 7.5729     | 12.3830 |                                                                                               |                         |    |    |   |   |
| SGO_0595 | 0.632                  | 5.291                | 0.0054  | 0.0183  | 10.500 | 9.000  | 12.6804    | 9.0000  | DNA-directed RNA polymerase, omega subunit                                                    |                         |    |    |   |   |
|          |                        |                      |         |         | 8.000  | 6.000  | 11.0151    | 6.4607  |                                                                                               |                         |    |    |   |   |
| SGO_0597 | -1.613                 | 5.275                | 0.0013  | 0.0022  | 4.500  | 13.000 | 5.4345     | 13.0000 | fmt; methionyl-tRNA formyltransferase                                                         |                         |    |    |   |   |
|          |                        |                      |         |         | 3.000  | 15.000 | 4.1306     | 16.1517 |                                                                                               |                         |    |    |   |   |
| SGO_0599 | -1.901                 | 6.606                | 0.0006  | 0.0005  | 7.000  | 40.500 | 8.4536     | 40.5000 | phosphoprotein phosphatase                                                                    |                         |    |    |   |   |
|          |                        |                      |         |         | 9.000  | 33.500 | 12.3919    | 36.0721 |                                                                                               |                         |    |    |   |   |
| SGO_0600 | -1.139                 | 4.891                | 0.0315  | 0.1751  | 4.500  | 14.000 | 5.4345     | 14.0000 | serine/threonine protein kinase                                                               |                         |    |    |   |   |
|          |                        |                      |         |         |        | 9.500  |            | 10.2294 |                                                                                               |                         |    |    |   |   |
| SGO_0604 | -1.487                 | 7.899                | 0.0001  | 0.0000  | 27.500 | 87.000 | 33.2107    | 87.0000 | hydrolase, haloacid dehalogenase family/peptidyl-prolyl cis-trans isomerase, cyclophilin type |                         |    |    |   |   |
|          |                        |                      |         |         | 21.500 | 82.500 | 29.6030    | 88.8343 |                                                                                               |                         |    |    |   |   |
| SGO_0606 | 0.171                  | 7.806                | 0.0019  | 0.0043  | 48.000 | 52.000 | 57.9677    | 52.0000 | cysK; cysteine synthase A                                                                     |                         |    |    |   |   |
|          |                        |                      |         |         | 44.000 | 49.500 | 60.5828    | 53.3006 |                                                                                               |                         |    |    |   |   |
| SGO_0610 | -0.637                 | 7.943                | 0.0136  | 0.0613  | 50.000 | 84.000 | 60.3830    | 84.0000 | ribosomal subunit interface protein                                                           |                         |    |    |   |   |
|          |                        |                      |         |         | 27.000 | 60.000 | 37.1758    | 64.6068 |                                                                                               |                         |    |    |   |   |
| SGO_0626 | 0.009                  | 2.590                |         |         | 2.500  | 3.000  | 3.0192     | 3.0000  | recX; Regulatory protein recX                                                                 |                         |    |    |   |   |
|          |                        |                      |         |         |        |        |            |         |                                                                                               |                         |    |    |   |   |
| SGO_0631 | 1.630                  | 4.171                | 0.0136  | 0.0613  | 6.000  | 2.500  | 7.2460     | 2.5000  | alpha-glycerophosphate oxidase                                                                |                         |    |    |   |   |
|          |                        |                      |         |         | 6.000  |        | 8.2613     |         |                                                                                               |                         |    |    |   |   |

- Show detected proteins only  
 Show all proteins

Proteins found:  
584

Filter by category:

ABC Transporter

Test

Cutoff

q-Value

.005

p-Value

|             | Signif | Direction | Applies To   |
|-------------|--------|-----------|--------------|
| Red         | yes    | +         | ratios, bars |
| Yellow      | no     | n/a       | bars         |
| Green       | yes    | -         | ratios, bars |
| Pink        | yes    | +         | p-, q-Values |
| Light Green | yes    | -         | p-, q-Values |

Dot Plots Dot Plots

Summary Table

SgFn vs Sg

SgPg vs Sg

SgPgFn vs Sg

SgPg vs SgFn

SgPgFn vs SgFn

SgPgFn vs SgPg

Coverage

SgPgFn vs SgFn

Raw

Normalized

Log<sub>2</sub> Ratios

| Protein  | SgPgFn vs SgFn         |                      |         |         | Raw     |         |          |          | Normalized |        |         |         | Description                                                                     | Log <sub>2</sub> Ratios |      |    |    |    |   |   |   |   |
|----------|------------------------|----------------------|---------|---------|---------|---------|----------|----------|------------|--------|---------|---------|---------------------------------------------------------------------------------|-------------------------|------|----|----|----|---|---|---|---|
|          | Log <sub>2</sub> Ratio | Log <sub>2</sub> Sum | q-Value | p-Value | SgPgFn  | SgFn    | SgPgFn   | SgFn     | SgPgFn     | SgFn   | SgPgFn  | SgFn    |                                                                                 | SgPgFn                  | SgFn | -6 | -4 | -2 | 0 | 2 | 4 | 6 |
| SGO_0639 | -0.153                 | 6.917                | 0.0555  | 0.3511  | 27.000  | 29.000  | 32.6068  | 29.0000  | 18.000     | 32.000 | 24.7839 | 34.4569 | valS; valyl-tRNA synthetase                                                     |                         |      |    |    |    |   |   |   |   |
|          |                        |                      |         |         |         |         |          |          |            |        |         |         |                                                                                 |                         |      |    |    |    |   |   |   |   |
| SGO_0641 | -0.612                 | 5.552                | 0.0071  | 0.0258  | 8.500   | 16.000  | 10.2651  | 16.0000  | 6.000      | 11.500 | 8.2613  | 12.3830 | ATPase, histidine kinase-, DNA gyrase B-, and HSP90-like domain protein protein |                         |      |    |    |    |   |   |   |   |
|          |                        |                      |         |         |         |         |          |          |            |        |         |         |                                                                                 |                         |      |    |    |    |   |   |   |   |
| SGO_0642 | 3.073                  | 6.884                | 0.0005  | 0.0003  | 46.500  | 4.500   | 56.1562  | 4.5000   | 35.500     | 8.000  | 48.8793 | 8.6142  | hypothetical protein SGO_0642                                                   |                         |      |    |    |    |   |   |   |   |
|          |                        |                      |         |         |         |         |          |          |            |        |         |         |                                                                                 |                         |      |    |    |    |   |   |   |   |
| SGO_0643 | -1.303                 | 3.846                | 0.0181  | 0.0853  | 2.000   | 5.500   | 2.4153   | 5.5000   |            |        |         |         | cytosine-specific methyltransferase                                             |                         |      |    |    |    |   |   |   |   |
|          |                        |                      |         |         |         |         |          |          |            |        |         |         |                                                                                 |                         |      |    |    |    |   |   |   |   |
| SGO_0644 | 0.830                  | 5.269                | 0.0045  | 0.0138  | 9.000   | 8.000   | 10.8689  | 8.0000   | 10.000     | 5.500  | 13.7688 | 5.9223  | hypothetical protein SGO_0644                                                   |                         |      |    |    |    |   |   |   |   |
|          |                        |                      |         |         |         |         |          |          |            |        |         |         |                                                                                 |                         |      |    |    |    |   |   |   |   |
| SGO_0652 | 0.556                  | 3.540                | 0.0164  | 0.0761  | 3.500   | 2.500   | 4.2268   | 2.5000   | 2.000      | 2.000  | 2.7538  | 2.1536  | hypothetical protein SGO_0652                                                   |                         |      |    |    |    |   |   |   |   |
|          |                        |                      |         |         |         |         |          |          |            |        |         |         |                                                                                 |                         |      |    |    |    |   |   |   |   |
| SGO_0654 | 1.957                  | 5.141                | 0.0205  | 0.1015  | 14.500  | 4.000   | 17.5111  | 4.0000   | 10.000     |        | 13.7688 |         | radical SAM enzyme, Cfr family                                                  |                         |      |    |    |    |   |   |   |   |
|          |                        |                      |         |         |         |         |          |          |            |        |         |         |                                                                                 |                         |      |    |    |    |   |   |   |   |
| SGO_0656 | -1.703                 | 5.379                | 0.0202  | 0.0985  | 5.500   | 8.000   | 6.6421   | 8.0000   | 2.000      | 22.500 | 2.7538  | 24.2275 | trpB-2; tryptophan synthase, beta subunit                                       |                         |      |    |    |    |   |   |   |   |
|          |                        |                      |         |         |         |         |          |          |            |        |         |         |                                                                                 |                         |      |    |    |    |   |   |   |   |
| SGO_0665 | 0.300                  | 8.721                | 0.0397  | 0.2299  | 115.500 | 107.500 | 139.4848 | 107.5000 | 68.500     | 75.000 | 94.3164 | 80.7585 | non-heme iron-containing ferritin                                               |                         |      |    |    |    |   |   |   |   |
|          |                        |                      |         |         |         |         |          |          |            |        |         |         |                                                                                 |                         |      |    |    |    |   |   |   |   |
| SGO_0669 | -0.151                 | 7.331                | 0.0325  | 0.1814  | 30.000  | 38.500  | 36.2298  | 38.5000  | 29.000     | 43.000 | 39.9296 | 46.3015 | typA; GTP-binding protein TypA                                                  |                         |      |    |    |    |   |   |   |   |
|          |                        |                      |         |         |         |         |          |          |            |        |         |         |                                                                                 |                         |      |    |    |    |   |   |   |   |
| SGO_0671 | -2.380                 | 6.703                | 0.0004  | 0.0002  | 6.500   | 46.500  | 7.8498   | 46.5000  | 6.500      | 38.000 | 8.9497  | 40.9176 | murD; UDP-N-acetylmuramoylalanine--D-glutamate ligase                           |                         |      |    |    |    |   |   |   |   |
|          |                        |                      |         |         |         |         |          |          |            |        |         |         |                                                                                 |                         |      |    |    |    |   |   |   |   |
| SGO_0672 | -3.122                 | 5.069                | 0.0180  | 0.0847  | 1.500   | 14.000  | 1.8115   | 14.0000  |            |        |         |         | murG; undecaprenyl-PP-MurNAc-pentapeptide-UDPGlcNAc GlcNAc transferase          |                         |      |    |    |    |   |   |   |   |
|          |                        |                      |         |         |         |         |          |          |            |        |         |         |                                                                                 |                         |      |    |    |    |   |   |   |   |

- Show detected proteins only  
 Show all proteins

Proteins found:  
584

Filter by category:

ABC Transporter

Test

Cutoff

q-Value

.005

p-Value

|             | Signif | Direction | Applies To   |
|-------------|--------|-----------|--------------|
| Red         | yes    | +         | ratios, bars |
| Yellow      | no     | n/a       | bars         |
| Green       | yes    | -         | ratios, bars |
| Pink        | yes    | +         | p-, q-Values |
| Light Green | yes    | -         | p-, q-Values |

Dot Plots Dot Plots

Summary Table

SgFn vs Sg

SgPg vs Sg

SgPgFn vs Sg

SgPg vs SgFn

SgPgFn vs SgFn

SgPgFn vs SgPg

Coverage

| Protein  | SgPgFn vs SgFn         |                      |         |         | Raw     |         | Normalized |          | Description                                           | Log <sub>2</sub> Ratios |    |    |   |   |
|----------|------------------------|----------------------|---------|---------|---------|---------|------------|----------|-------------------------------------------------------|-------------------------|----|----|---|---|
|          | Log <sub>2</sub> Ratio | Log <sub>2</sub> Sum | q-Value | p-Value | SgPgFn  | SgFn    | SgPgFn     | SgFn     |                                                       | -6                      | -4 | -2 | 0 | 2 |
| SGO_0673 | -1.270                 | 3.853                | 0.0431  | 0.2539  | 2.000   | 4.500   | 2.4153     | 4.5000   | DivIB; cell division protein DivIB                    |                         |    |    |   |   |
|          |                        |                      |         |         |         | 7.000   |            | 7.5375   |                                                       |                         |    |    |   |   |
| SGO_0674 | -0.140                 | 8.291                | 0.0145  | 0.0659  | 58.500  | 84.500  | 70.6481    | 84.5000  | ftsA; cell division protein FtsA                      |                         |    |    |   |   |
|          |                        |                      |         |         | 57.000  | 74.000  | 78.4823    | 79.6817  |                                                       |                         |    |    |   |   |
| SGO_0675 | 0.204                  | 9.139                | 0.0478  | 0.2859  | 121.000 | 155.500 | 146.1269   | 155.5000 | ftsZ; cell division protein FtsZ                      |                         |    |    |   |   |
|          |                        |                      |         |         | 111.500 | 101.000 | 153.5224   | 108.7547 |                                                       |                         |    |    |   |   |
| SGO_0676 | 0.182                  | 4.768                | 0.0997  | 0.6987  | 6.000   | 4.500   | 7.2460     | 4.5000   | conserved hypothetical protein TIGR00044              |                         |    |    |   |   |
|          |                        |                      |         |         | 5.000   | 8.000   | 6.8844     | 8.6142   |                                                       |                         |    |    |   |   |
| SGO_0677 | -0.046                 | 6.798                | 0.1359  | 0.9911  | 29.000  | 26.500  | 35.0221    | 26.5000  | ylmF protein                                          |                         |    |    |   |   |
|          |                        |                      |         |         | 15.000  | 27.000  | 20.6532    | 29.0730  |                                                       |                         |    |    |   |   |
| SGO_0680 | 0.341                  | 7.668                | 0.0356  | 0.2039  | 41.000  | 55.000  | 49.5141    | 55.0000  | cell division protein DivIVA                          |                         |    |    |   |   |
|          |                        |                      |         |         | 46.000  | 33.000  | 63.3366    | 35.5337  |                                                       |                         |    |    |   |   |
| SGO_0681 | 0.551                  | 7.377                | 0.0007  | 0.0008  | 42.500  | 33.500  | 51.3256    | 33.5000  | ileS; isoleucyl-tRNA synthetase                       |                         |    |    |   |   |
|          |                        |                      |         |         | 34.500  | 31.500  | 47.5024    | 33.9186  |                                                       |                         |    |    |   |   |
| SGO_0684 | -0.924                 | 7.324                | 0.0010  | 0.0012  | 23.500  | 49.000  | 28.3800    | 49.0000  | hypothetical protein SGO_0684                         |                         |    |    |   |   |
|          |                        |                      |         |         | 19.500  | 52.000  | 26.8492    | 55.9925  |                                                       |                         |    |    |   |   |
| SGO_0688 | -0.832                 | 6.996                | 0.0118  | 0.0511  | 19.000  | 31.000  | 22.9455    | 31.0000  | ATP dependent Clp protease, ATP-binding subunit, ClpE |                         |    |    |   |   |
|          |                        |                      |         |         | 16.000  | 48.000  | 22.0301    | 51.6854  |                                                       |                         |    |    |   |   |
| SGO_0693 | -2.773                 | 4.999                | 0.0401  | 0.2338  |         | 10.000  |            | 10.0000  | xseA; exodeoxyribonuclease VII, large subunit         |                         |    |    |   |   |
|          |                        |                      |         |         | 1.500   | 18.500  | 2.0653     | 19.9204  |                                                       |                         |    |    |   |   |
| SGO_0700 | 0.210                  | 4.677                | 0.0820  | 0.5588  | 4.000   | 7.500   | 4.8306     | 7.5000   | DegV family protein                                   |                         |    |    |   |   |
|          |                        |                      |         |         | 6.500   | 4.000   | 8.9497     | 4.3071   |                                                       |                         |    |    |   |   |
| SGO_0701 | 0.186                  | 11.819               | 0.0600  | 0.3839  | 898.500 | 705.500 | 1085.0828  | 705.5000 | hup; DNA-binding histone-like protein HU              |                         |    |    |   |   |
|          |                        |                      |         |         | 605.000 | 919.000 | 833.0138   | 989.5603 |                                                       |                         |    |    |   |   |

- Show detected proteins only
- Show all proteins

Proteins found: 584

Filter by category:

ABC Transporter

Test

Cutoff

q-Value

.005

p-Value

|  | Signif | Direction | Applies To   |
|--|--------|-----------|--------------|
|  | yes    | +         | ratios, bars |
|  | no     | n/a       | bars         |
|  | yes    | -         | ratios, bars |
|  | yes    | +         | p-, q-Values |
|  | yes    | -         | p-, q-Values |

Dot Plots Dot Plots



Summary Table

SgFn vs Sg

SgPg vs Sg

SgPgFn vs Sg

SgPg vs SgFn

SgPgFn vs SgFn

SgPgFn vs SgPg

Coverage

SgPgFn vs SgFn

Raw

Normalized

Log<sub>2</sub> Ratios

| Protein  | SgPgFn vs SgFn         |                      |         |         | Raw     |         | Normalized |          | Description                                                     | Log <sub>2</sub> Ratios |    |    |   |   |
|----------|------------------------|----------------------|---------|---------|---------|---------|------------|----------|-----------------------------------------------------------------|-------------------------|----|----|---|---|
|          | Log <sub>2</sub> Ratio | Log <sub>2</sub> Sum | q-Value | p-Value | SgPgFn  | SgFn    | SgPgFn     | SgFn     |                                                                 | -6                      | -4 | -2 | 0 | 2 |
| SGO_0704 | 0.940                  | 10.868               | 0.0004  | 0.0002  | 501.500 | 341.500 | 605.6417   | 341.5000 | gpmA; 2,3-bisphosphoglycerate-dependent phosphoglycerate mutase |                         |    |    |   |   |
|          |                        |                      |         |         | 452.000 | 278.500 | 622.3508   | 299.8831 |                                                                 |                         |    |    |   |   |
| SGO_0706 | -1.667                 | 5.147                | 0.0054  | 0.0186  |         | 15.000  |            | 15.0000  | phoH-like protein                                               |                         |    |    |   |   |
|          |                        |                      |         |         | 3.500   | 14.500  | 4.8191     | 15.6133  |                                                                 |                         |    |    |   |   |
| SGO_0707 | -5.080                 | 7.793                | 0.0006  | 0.0005  | 4.000   | 118.500 | 4.8306     | 118.5000 | LPXTG cell wall surface protein                                 |                         |    |    |   |   |
|          |                        |                      |         |         | 1.500   | 89.500  | 2.0653     | 96.3718  |                                                                 |                         |    |    |   |   |
| SGO_0708 | -2.330                 | 10.393               | 0.0001  | 0.0000  | 83.500  | 564.500 | 100.8396   | 564.5000 | ald; alanine dehydrogenase                                      |                         |    |    |   |   |
|          |                        |                      |         |         | 89.500  | 516.500 | 123.2310   | 556.1566 |                                                                 |                         |    |    |   |   |
| SGO_0713 | -0.925                 | 6.666                | 0.0007  | 0.0007  | 16.000  | 32.500  | 19.3226    | 32.5000  | sgg; GTP-binding protein Era                                    |                         |    |    |   |   |
|          |                        |                      |         |         | 11.500  | 31.500  | 15.8341    | 33.9186  |                                                                 |                         |    |    |   |   |
| SGO_0721 | -0.265                 | 4.636                | 0.1044  | 0.7373  | 7.000   | 6.500   | 8.4536     | 6.5000   | abpB-like dipeptidase lipoprotein                               |                         |    |    |   |   |
|          |                        |                      |         |         | 2.500   | 6.000   | 3.4422     | 6.4607   |                                                                 |                         |    |    |   |   |
| SGO_0736 | -2.868                 | 4.823                | 0.0101  | 0.0416  | 1.500   | 12.500  | 1.8115     | 12.5000  | hprK; HPr(Ser) kinase/phosphatase                               |                         |    |    |   |   |
|          |                        |                      |         |         |         | 13.000  |            | 13.9981  |                                                                 |                         |    |    |   |   |
| SGO_0739 | 1.421                  | 4.361                | 0.0109  | 0.0466  | 7.500   |         | 9.0575     |          | hypothetical protein SGO_0739                                   |                         |    |    |   |   |
|          |                        |                      |         |         | 6.000   | 3.000   | 8.2613     | 3.2303   |                                                                 |                         |    |    |   |   |
| SGO_0742 | -0.616                 | 5.103                | 0.0023  | 0.0056  | 7.000   | 13.000  | 8.4536     | 13.0000  | peptidase, U32 family                                           |                         |    |    |   |   |
|          |                        |                      |         |         |         | 12.000  |            | 12.9214  |                                                                 |                         |    |    |   |   |
| SGO_0743 | 0.950                  | 5.620                | 0.0085  | 0.0330  | 10.500  | 9.000   | 12.6804    | 9.0000   | peptidase, U32 family                                           |                         |    |    |   |   |
|          |                        |                      |         |         | 14.500  | 7.000   | 19.9648    | 7.5375   |                                                                 |                         |    |    |   |   |
| SGO_0745 | 1.053                  | 6.078                | 0.0389  | 0.2241  | 27.000  |         | 32.6068    |          | hypothetical protein SGO_0745                                   |                         |    |    |   |   |
|          |                        |                      |         |         | 16.000  | 12.000  | 22.0301    | 12.9214  |                                                                 |                         |    |    |   |   |
| SGO_0749 | -1.737                 | 6.673                | 0.0041  | 0.0126  | 10.000  | 30.500  | 12.0766    | 30.5000  | glutathione reductase                                           |                         |    |    |   |   |
|          |                        |                      |         |         | 8.000   | 45.000  | 11.0151    | 48.4551  |                                                                 |                         |    |    |   |   |

- Show detected proteins only  
 Show all proteins

Proteins found:  
584

Filter by category:

ABC Transporter

Test

Cutoff

q-Value

.005

p-Value

|  | Signif | Direction | Applies To   |
|--|--------|-----------|--------------|
|  | yes    | +         | ratios, bars |
|  | no     | n/a       | bars         |
|  | yes    | -         | ratios, bars |
|  | yes    | +         | p-, q-Values |
|  | yes    | -         | p-, q-Values |

Dot Plots

Summary Table

SgFn vs Sg

SgPg vs Sg

SgPgFn vs Sg

SgPg vs SgFn

SgPgFn vs SgFn

SgPgFn vs SgPg

Coverage

SgPgFn vs SgFn

Raw

Normalized

Log<sub>2</sub> Ratios

| Protein  | SgPgFn vs SgFn         |                      |         |         | Raw      |          | Normalized |           | Description                                               | Log <sub>2</sub> Ratios |    |    |   |   |   |   |
|----------|------------------------|----------------------|---------|---------|----------|----------|------------|-----------|-----------------------------------------------------------|-------------------------|----|----|---|---|---|---|
|          | Log <sub>2</sub> Ratio | Log <sub>2</sub> Sum | q-Value | p-Value | SgPgFn   | SgFn     | SgPgFn     | SgFn      |                                                           | -6                      | -4 | -2 | 0 | 2 | 4 | 6 |
| SGO_0750 | 3.135                  | 7.045                | 0.0004  | 0.0002  | 52.500   | 6.000    | 63.4022    | 6.0000    | efflux transporter, RND family, MFP subunit subfamily     |                         |    |    |   |   |   |   |
|          |                        |                      |         |         | 40.000   | 7.000    | 55.0753    | 7.5375    |                                                           |                         |    |    |   |   |   |   |
| SGO_0751 | 3.211                  | 6.554                | 0.0004  | 0.0003  | 37.500   | 3.500    | 45.2873    | 3.5000    | ABC transporter, ATP-binding protein SP0786               |                         |    |    |   |   |   |   |
|          |                        |                      |         |         | 28.500   | 5.500    | 39.2411    | 5.9223    |                                                           |                         |    |    |   |   |   |   |
| SGO_0753 | 0.624                  | 7.633                | 0.0121  | 0.0526  | 46.000   | 50.000   | 55.5524    | 50.0000   | lysS; lysyl-tRNA synthetase                               |                         |    |    |   |   |   |   |
|          |                        |                      |         |         | 46.000   | 27.500   | 63.3366    | 29.6114   |                                                           |                         |    |    |   |   |   |   |
| SGO_0755 | -0.500                 | 3.740                | 0.0565  | 0.3592  |          | 4.000    |            | 4.0000    | regulatory protein                                        |                         |    |    |   |   |   |   |
|          |                        |                      |         |         | 2.500    | 5.500    | 3.4422     | 5.9223    |                                                           |                         |    |    |   |   |   |   |
| SGO_0760 | -0.093                 | 8.287                | 0.0546  | 0.3434  | 67.000   | 75.000   | 80.9132    | 75.0000   | ppc; phosphoenolpyruvate carboxylase                      |                         |    |    |   |   |   |   |
|          |                        |                      |         |         | 51.000   | 80.000   | 70.2210    | 86.1424   |                                                           |                         |    |    |   |   |   |   |
| SGO_0761 | -0.330                 | 12.893               | 0.0045  | 0.0138  | 1410.000 | 1976.000 | 1702.8011  | 1976.0000 | tuf; translation elongation factor Tu                     |                         |    |    |   |   |   |   |
|          |                        |                      |         |         | 1207.500 | 2103.500 | 1662.5854  | 2265.0056 |                                                           |                         |    |    |   |   |   |   |
| SGO_0762 | 1.303                  | 10.244               | 0.0054  | 0.0182  | 436.000  | 150.500  | 526.5399   | 150.5000  | tpiA; triosephosphate isomerase                           |                         |    |    |   |   |   |   |
|          |                        |                      |         |         | 247.000  | 181.500  | 340.0899   | 195.4355  |                                                           |                         |    |    |   |   |   |   |
| SGO_0763 | -0.615                 | 6.340                | 0.0148  | 0.0673  | 17.500   | 24.500   | 21.1341    | 24.5000   | murA-1; UDP-N-acetylglucosamine 1-carboxyvinyltransferase |                         |    |    |   |   |   |   |
|          |                        |                      |         |         | 8.500    | 22.000   | 11.7035    | 23.6891   |                                                           |                         |    |    |   |   |   |   |
| SGO_0771 | -0.658                 | 7.462                | 0.0020  | 0.0046  | 28.000   | 58.500   | 33.8145    | 58.5000   | pepq; proline dipeptidase                                 |                         |    |    |   |   |   |   |
|          |                        |                      |         |         | 25.000   | 46.000   | 34.4221    | 49.5319   |                                                           |                         |    |    |   |   |   |   |
| SGO_0773 | -0.172                 | 7.448                | 0.0253  | 0.1330  | 32.000   | 42.500   | 38.6451    | 42.5000   | ccpA; catabolite control protein A                        |                         |    |    |   |   |   |   |
|          |                        |                      |         |         | 31.500   | 46.500   | 43.3718    | 50.0702   |                                                           |                         |    |    |   |   |   |   |
| SGO_0774 | -0.022                 | 4.332                | 0.1048  | 0.7413  | 5.500    | 6.500    | 6.6421     | 6.5000    | glycosyl transferase, group 1 family protein              |                         |    |    |   |   |   |   |
|          |                        |                      |         |         |          | 6.500    |            | 6.9991    |                                                           |                         |    |    |   |   |   |   |
| SGO_0775 | -0.629                 | 4.816                | 0.0103  | 0.0434  | 4.500    | 7.000    | 5.4345     | 7.0000    | glycosyl transferase, group 1                             |                         |    |    |   |   |   |   |
|          |                        |                      |         |         | 4.000    | 9.500    | 5.5075     | 10.2294   |                                                           |                         |    |    |   |   |   |   |

- Show detected proteins only  
 Show all proteins

Proteins found:  
584

Filter by category:

ABC Transporter

Test

Cutoff

q-Value

.005

p-Value

|             | Signif | Direction | Applies To   |
|-------------|--------|-----------|--------------|
| Red         | yes    | +         | ratios, bars |
| Yellow      | no     | n/a       | bars         |
| Green       | yes    | -         | ratios, bars |
| Pink        | yes    | +         | p-, q-Values |
| Light Green | yes    | -         | p-, q-Values |

Dot Plots Dot Plots

Summary Table

SgFn vs Sg

SgPg vs Sg

SgPgFn vs Sg

SgPg vs SgFn

SgPgFn vs SgFn

SgPgFn vs SgPg

Coverage

SgPgFn vs SgFn

Raw

Normalized

Log<sub>2</sub> Ratios

| Protein  | SgPgFn vs SgFn         |                      |         |         | Raw    |        | Normalized |         | Description                                 | Log <sub>2</sub> Ratios |    |    |   |   |   |
|----------|------------------------|----------------------|---------|---------|--------|--------|------------|---------|---------------------------------------------|-------------------------|----|----|---|---|---|
|          | Log <sub>2</sub> Ratio | Log <sub>2</sub> Sum | q-Value | p-Value | SgPgFn | SgFn   | SgPgFn     | SgFn    |                                             | -6                      | -4 | -2 | 0 | 2 | 4 |
| SGO_0778 | 0.220                  | 7.659                | 0.0011  | 0.0016  | 45.000 | 45.500 | 54.3447    | 45.5000 | thrS; threonyl-tRNA synthetase              |                         |    |    |   |   |   |
|          |                        |                      |         |         | 39.500 | 44.500 | 54.3869    | 47.9167 |                                             |                         |    |    |   |   |   |
| SGO_0779 | -2.878                 | 6.457                | 0.0005  | 0.0004  | 6.500  | 40.500 | 7.8498     | 40.5000 | response regulator                          |                         |    |    |   |   |   |
|          |                        |                      |         |         | 2.500  | 33.500 | 3.4422     | 36.0721 |                                             |                         |    |    |   |   |   |
| SGO_0784 | -1.232                 | 5.715                | 0.0055  | 0.0190  | 6.500  | 14.500 | 7.8498     | 14.5000 | smc; chromosome segregation protein SMC     |                         |    |    |   |   |   |
|          |                        |                      |         |         | 5.500  | 21.000 | 7.5729     | 22.6124 |                                             |                         |    |    |   |   |   |
| SGO_0786 | 1.427                  | 4.116                | 0.0282  | 0.1522  | 7.000  |        | 8.4536     |         | Cof family protein                          |                         |    |    |   |   |   |
|          |                        |                      |         |         | 4.500  | 2.500  | 6.1960     | 2.6919  |                                             |                         |    |    |   |   |   |
| SGO_0787 | -0.232                 | 5.787                | 0.0490  | 0.2959  | 9.000  | 17.500 | 10.8689    | 17.5000 | ftsY; cell division protein FtsY            |                         |    |    |   |   |   |
|          |                        |                      |         |         | 10.500 | 11.500 | 14.4573    | 12.3830 |                                             |                         |    |    |   |   |   |
| SGO_0788 | -1.100                 | 7.383                | 0.0027  | 0.0071  | 22.000 | 49.000 | 26.5685    | 49.0000 | zwf; glucose-6-phosphate 1-dehydrogenase    |                         |    |    |   |   |   |
|          |                        |                      |         |         | 19.000 | 60.500 | 26.1608    | 65.1452 |                                             |                         |    |    |   |   |   |
| SGO_0792 | 1.458                  | 5.456                | 0.0009  | 0.0011  | 14.000 | 7.000  | 16.9072    | 7.0000  | hypothetical protein SGO_0792               |                         |    |    |   |   |   |
|          |                        |                      |         |         | 11.000 | 4.500  | 15.1457    | 4.8455  |                                             |                         |    |    |   |   |   |
| SGO_0794 | -0.896                 | 6.619                | 0.0029  | 0.0081  | 13.500 | 28.000 | 16.3034    | 28.0000 | metallo-beta-lactamase family protein       |                         |    |    |   |   |   |
|          |                        |                      |         |         | 13.000 | 33.500 | 17.8995    | 36.0721 |                                             |                         |    |    |   |   |   |
| SGO_0795 | -1.539                 | 4.805                | 0.0031  | 0.0086  | 3.000  | 8.500  | 3.6230     | 8.5000  | tributyryn esterase                         |                         |    |    |   |   |   |
|          |                        |                      |         |         | 2.500  | 11.500 | 3.4422     | 12.3830 |                                             |                         |    |    |   |   |   |
| SGO_0798 | -0.286                 | 5.940                | 0.0007  | 0.0007  | 11.500 | 16.500 | 13.8881    | 16.5000 | ABC transporter, ATP-binding protein SP1381 |                         |    |    |   |   |   |
|          |                        |                      |         |         | 10.000 | 16.000 | 13.7688    | 17.2285 |                                             |                         |    |    |   |   |   |
| SGO_0800 | 0.330                  | 3.454                | 0.0202  | 0.0988  | 3.500  | 3.500  | 4.2268     | 3.5000  | polysaccharide deacetylase family protein   |                         |    |    |   |   |   |
|          |                        |                      |         |         |        | 3.000  |            | 3.2303  |                                             |                         |    |    |   |   |   |
| SGO_0801 | 0.123                  | 7.802                | 0.0693  | 0.4577  | 58.500 | 54.500 | 70.6481    | 54.5000 | hom; homoserine dehydrogenase               |                         |    |    |   |   |   |
|          |                        |                      |         |         | 34.000 | 47.500 | 46.8140    | 51.1470 |                                             |                         |    |    |   |   |   |

- Show detected proteins only  
 Show all proteins

Proteins found:  
584

Filter by category:

ABC Transporter

Test

Cutoff

q-Value

.005

p-Value

|             | Signif | Direction | Applies To   |
|-------------|--------|-----------|--------------|
| Red         | yes    | +         | ratios, bars |
| Yellow      | no     | n/a       | bars         |
| Green       | yes    | -         | ratios, bars |
| Pink        | yes    | +         | p-, q-Values |
| Light Green | yes    | -         | p-, q-Values |

Dot Plots Dot Plots

Summary Table

SgFn vs Sg

SgPg vs Sg

SgPgFn vs Sg

SgPg vs SgFn

SgPgFn vs SgFn

SgPgFn vs SgPg

Coverage

SgPgFn vs SgFn

Raw

Normalized

Log<sub>2</sub> Ratios

| Protein  | SgPgFn vs SgFn         |                      |         |         | Raw     |         |          |          | Normalized |      |        |      | Description | Log <sub>2</sub> Ratios |    |    |   |   |   |   |
|----------|------------------------|----------------------|---------|---------|---------|---------|----------|----------|------------|------|--------|------|-------------|-------------------------|----|----|---|---|---|---|
|          | Log <sub>2</sub> Ratio | Log <sub>2</sub> Sum | q-Value | p-Value | SgPgFn  | SgFn    | SgPgFn   | SgFn     | SgPgFn     | SgFn | SgPgFn | SgFn |             | -6                      | -4 | -2 | 0 | 2 | 4 | 6 |
| SGO_0802 | -0.982                 | 5.582                | 0.0015  | 0.0031  | 5.500   | 16.000  | 6.6421   | 16.0000  |            |      |        |      |             |                         |    |    |   |   |   |   |
|          |                        |                      |         |         | 7.000   | 14.500  | 9.6382   | 15.6133  |            |      |        |      |             |                         |    |    |   |   |   |   |
| SGO_0815 | 0.556                  | 5.645                | 0.0041  | 0.0124  | 11.500  | 9.000   | 13.8881  | 9.0000   |            |      |        |      |             |                         |    |    |   |   |   |   |
|          |                        |                      |         |         | 11.500  | 10.500  | 15.8341  | 11.3062  |            |      |        |      |             |                         |    |    |   |   |   |   |
| SGO_0818 | 3.147                  | 8.361                | 0.0134  | 0.0601  | 118.000 | 17.500  | 142.5039 | 17.5000  |            |      |        |      |             |                         |    |    |   |   |   |   |
|          |                        |                      |         |         | 122.500 |         | 168.6681 |          |            |      |        |      |             |                         |    |    |   |   |   |   |
| SGO_0820 | 0.734                  | 6.156                | 0.0515  | 0.3181  | 28.000  |         | 33.8145  |          |            |      |        |      |             |                         |    |    |   |   |   |   |
|          |                        |                      |         |         | 15.500  | 15.000  | 21.3417  | 16.1517  |            |      |        |      |             |                         |    |    |   |   |   |   |
| SGO_0824 | 0.136                  | 6.548                | 0.0078  | 0.0297  | 19.500  | 22.500  | 23.5494  | 22.5000  |            |      |        |      |             |                         |    |    |   |   |   |   |
|          |                        |                      |         |         | 18.500  | 20.500  | 25.4723  | 22.0740  |            |      |        |      |             |                         |    |    |   |   |   |   |
| SGO_0832 | 0.783                  | 2.444                |         |         |         | 2.000   |          | 2.0000   |            |      |        |      |             |                         |    |    |   |   |   |   |
|          |                        |                      |         |         | 2.500   |         | 3.4422   |          |            |      |        |      |             |                         |    |    |   |   |   |   |
| SGO_0835 | -1.203                 | 8.066                | 0.0008  | 0.0008  | 28.500  | 93.000  | 34.4183  | 93.0000  |            |      |        |      |             |                         |    |    |   |   |   |   |
|          |                        |                      |         |         | 34.500  | 86.500  | 47.5024  | 93.1414  |            |      |        |      |             |                         |    |    |   |   |   |   |
| SGO_0836 | -0.820                 | 8.604                | 0.0015  | 0.0029  | 65.000  | 130.500 | 78.4979  | 130.5000 |            |      |        |      |             |                         |    |    |   |   |   |   |
|          |                        |                      |         |         | 45.500  | 109.000 | 62.6481  | 117.3690 |            |      |        |      |             |                         |    |    |   |   |   |   |
| SGO_0842 | -2.356                 | 5.463                | 0.0027  | 0.0073  | 3.000   | 22.500  | 3.6230   | 22.5000  |            |      |        |      |             |                         |    |    |   |   |   |   |
|          |                        |                      |         |         | 2.500   | 13.500  | 3.4422   | 14.5365  |            |      |        |      |             |                         |    |    |   |   |   |   |
| SGO_0848 | 2.122                  | 7.230                | 0.0005  | 0.0003  | 52.000  | 18.000  | 62.7983  | 18.0000  |            |      |        |      |             |                         |    |    |   |   |   |   |
|          |                        |                      |         |         | 42.500  | 10.000  | 58.5175  | 10.7678  |            |      |        |      |             |                         |    |    |   |   |   |   |
| SGO_0850 | 1.997                  | 7.200                | 0.0101  | 0.0422  | 68.500  | 16.000  | 82.7247  | 16.0000  |            |      |        |      |             |                         |    |    |   |   |   |   |
|          |                        |                      |         |         | 26.500  | 11.000  | 36.4874  | 11.8446  |            |      |        |      |             |                         |    |    |   |   |   |   |
| SGO_0854 | -2.678                 | 5.896                | 0.0048  | 0.0152  | 3.000   | 33.500  | 3.6230   | 33.5000  |            |      |        |      |             |                         |    |    |   |   |   |   |
|          |                        |                      |         |         | 3.000   | 17.000  | 4.1306   | 18.3053  |            |      |        |      |             |                         |    |    |   |   |   |   |

- Show detected proteins only  
 Show all proteins

Proteins found:  
584

Filter by category:

ABC Transporter

Test

Cutoff

q-Value

.005

p-Value

|             | Signif | Direction | Applies To   |
|-------------|--------|-----------|--------------|
| Red         | yes    | +         | ratios, bars |
| Yellow      | no     | n/a       | bars         |
| Green       | yes    | -         | ratios, bars |
| Pink        | yes    | +         | p-, q-Values |
| Light Green | yes    | -         | p-, q-Values |

Dot Plots Dot Plots

Summary Table

SgFn vs Sg

SgPg vs Sg

SgPgFn vs Sg

SgPg vs SgFn

SgPgFn vs SgFn

SgPgFn vs SgPg

Coverage

SgPgFn vs SgFn

Raw

Normalized

Log<sub>2</sub> Ratios

| Protein  | SgPgFn vs SgFn         |                      |         |         | Raw    |        | Normalized |         | Description                                       | Log <sub>2</sub> Ratios |    |    |   |   |
|----------|------------------------|----------------------|---------|---------|--------|--------|------------|---------|---------------------------------------------------|-------------------------|----|----|---|---|
|          | Log <sub>2</sub> Ratio | Log <sub>2</sub> Sum | q-Value | p-Value | SgPgFn | SgFn   | SgPgFn     | SgFn    |                                                   | -6                      | -4 | -2 | 0 | 2 |
| SGO_0856 | 1.007                  | 5.228                | 0.0013  | 0.0022  | 11.000 | 5.500  | 13.2843    | 5.5000  | ABC transporter, substrate binding protein        |                         |    |    |   |   |
|          |                        |                      |         |         | 8.500  | 6.500  | 11.7035    | 6.9991  |                                                   |                         |    |    |   |   |
| SGO_0859 | -1.212                 | 6.420                | 0.0006  | 0.0004  | 9.500  | 29.000 | 11.4728    | 29.0000 | pheS; phenylalanyl-tRNA synthetase, alpha subunit |                         |    |    |   |   |
|          |                        |                      |         |         | 10.500 | 28.500 | 14.4573    | 30.6882 |                                                   |                         |    |    |   |   |
| SGO_0861 | 0.878                  | 7.798                | 0.0013  | 0.0023  | 56.000 | 35.500 | 67.6290    | 35.5000 | pheT; phenylalanyl-tRNA synthetase, beta subunit  |                         |    |    |   |   |
|          |                        |                      |         |         | 55.500 | 40.000 | 76.4170    | 43.0712 |                                                   |                         |    |    |   |   |
| SGO_0885 | -1.267                 | 4.744                | 0.0049  | 0.0163  | 3.000  | 11.500 | 3.6230     | 11.5000 | cobyrinic acid synthase                           |                         |    |    |   |   |
|          |                        |                      |         |         | 3.000  | 7.000  | 4.1306     | 7.5375  |                                                   |                         |    |    |   |   |
| SGO_0889 | -0.291                 | 5.387                | 0.0344  | 0.1939  | 9.500  | 11.500 | 11.4728    | 11.5000 | glmM; phosphoglucosamine mutase                   |                         |    |    |   |   |
|          |                        |                      |         |         | 5.500  | 10.500 | 7.5729     | 11.3062 |                                                   |                         |    |    |   |   |
| SGO_0893 | -0.251                 | 6.921                | 0.0001  | 0.0000  | 23.000 | 33.000 | 27.7762    | 33.0000 | GTP-binding protein                               |                         |    |    |   |   |
|          |                        |                      |         |         | 20.000 | 30.500 | 27.5376    | 32.8418 |                                                   |                         |    |    |   |   |
| SGO_0901 | -1.363                 | 5.098                | 0.0016  | 0.0033  | 3.000  | 11.500 | 3.6230     | 11.5000 | DNA-directed DNA polymerase III                   |                         |    |    |   |   |
|          |                        |                      |         |         | 4.500  | 12.000 | 6.1960     | 12.9214 |                                                   |                         |    |    |   |   |
| SGO_0906 | -1.439                 | 7.258                | 0.0005  | 0.0004  | 14.500 | 56.500 | 17.5111    | 56.5000 | leuA; 2-isopropylmalate synthase                  |                         |    |    |   |   |
|          |                        |                      |         |         | 17.500 | 51.000 | 24.0954    | 54.9158 |                                                   |                         |    |    |   |   |
| SGO_0911 | -0.121                 | 7.397                | 0.0554  | 0.3488  | 29.500 | 45.000 | 35.6260    | 45.0000 | hypothetical protein SGO_0911                     |                         |    |    |   |   |
|          |                        |                      |         |         | 33.000 | 39.500 | 45.4371    | 42.5328 |                                                   |                         |    |    |   |   |
| SGO_0946 | -1.336                 | 5.975                | 0.0016  | 0.0033  | 5.500  | 23.000 | 6.6421     | 23.0000 | Deblocking aminopeptidase                         |                         |    |    |   |   |
|          |                        |                      |         |         | 8.500  | 20.000 | 11.7035    | 21.5356 |                                                   |                         |    |    |   |   |
| SGO_0949 | -0.281                 | 3.421                | 0.0875  | 0.6042  | 2.500  | 5.000  | 3.0192     | 5.0000  | deaD; DEAD RNA helicase                           |                         |    |    |   |   |
|          |                        |                      |         |         |        | 2.500  |            | 2.6919  |                                                   |                         |    |    |   |   |
| SGO_0950 | -2.074                 | 4.525                | 0.0255  | 0.1345  | 2.000  | 12.000 | 2.4153     | 12.0000 | oxidoreductase                                    |                         |    |    |   |   |
|          |                        |                      |         |         |        | 8.000  |            | 8.6142  |                                                   |                         |    |    |   |   |

- Show detected proteins only  
 Show all proteins

Proteins found:  
584

Filter by category:

ABC Transporter

Test

Cutoff

q-Value

.005

p-Value

|             | Signif | Direction | Applies To   |
|-------------|--------|-----------|--------------|
| Red         | yes    | +         | ratios, bars |
| Yellow      | no     | n/a       | bars         |
| Green       | yes    | -         | ratios, bars |
| Pink        | yes    | +         | p-, q-Values |
| Light Green | yes    | -         | p-, q-Values |

Dot Plots Dot Plots

Summary Table

SgFn vs Sg

SgPg vs Sg

SgPgFn vs Sg

SgPg vs SgFn

SgPgFn vs SgFn

SgPgFn vs SgPg

Coverage

SgPgFn vs SgFn

Raw

Normalized

Log<sub>2</sub> Ratios

| Protein  | SgPgFn vs SgFn         |                      |         |         | Raw    |         | Normalized |          | Description                                            | Log <sub>2</sub> Ratios |    |    |   |   |
|----------|------------------------|----------------------|---------|---------|--------|---------|------------|----------|--------------------------------------------------------|-------------------------|----|----|---|---|
|          | Log <sub>2</sub> Ratio | Log <sub>2</sub> Sum | q-Value | p-Value | SgPgFn | SgFn    | SgPgFn     | SgFn     |                                                        | -6                      | -4 | -2 | 0 | 2 |
| SGO_0951 | -0.146                 | 4.844                | 0.0608  | 0.3924  | 5.000  | 6.500   | 6.0383     | 6.5000   | udk; uridine kinase                                    |                         |    |    |   |   |
|          |                        |                      |         |         | 5.500  | 8.000   | 7.5729     | 8.6142   |                                                        |                         |    |    |   |   |
| SGO_0954 | -0.015                 | 5.584                | 0.1274  | 0.9148  | 7.500  | 13.000  | 9.0575     | 13.0000  | ATP-binding protein                                    |                         |    |    |   |   |
|          |                        |                      |         |         | 11.000 | 10.000  | 15.1457    | 10.7678  |                                                        |                         |    |    |   |   |
| SGO_0982 | -0.924                 | 4.987                | 0.0004  | 0.0002  | 4.500  | 10.000  | 5.4345     | 10.0000  | amino acid ABC transporter, amino acid-binding protein |                         |    |    |   |   |
|          |                        |                      |         |         | 4.000  | 10.000  | 5.5075     | 10.7678  |                                                        |                         |    |    |   |   |
| SGO_0987 | 0.076                  | 6.818                | 0.0052  | 0.0176  | 24.000 | 28.000  | 28.9838    | 28.0000  | metK; S-adenosylmethionine synthetase                  |                         |    |    |   |   |
|          |                        |                      |         |         | 21.000 | 25.000  | 28.9145    | 26.9195  |                                                        |                         |    |    |   |   |
| SGO_0993 | -0.346                 | 3.118                | 0.0694  | 0.4602  | 2.000  | 2.500   | 2.4153     | 2.5000   | GTP-binding protein HflX                               |                         |    |    |   |   |
|          |                        |                      |         |         |        | 3.500   |            | 3.7687   |                                                        |                         |    |    |   |   |
| SGO_0995 | -2.159                 | 4.605                | 0.0271  | 0.1436  | 2.000  | 9.000   | 2.4153     | 9.0000   | metallo-beta-lactamase superfamily protein             |                         |    |    |   |   |
|          |                        |                      |         |         |        | 12.000  |            | 12.9214  |                                                        |                         |    |    |   |   |
| SGO_1001 | -0.540                 | 7.161                | 0.0225  | 0.1147  | 20.000 | 33.000  | 24.1532    | 33.0000  | apt; adenine phosphoribosyltransferase                 |                         |    |    |   |   |
|          |                        |                      |         |         | 24.500 | 48.500  | 33.7336    | 52.2238  |                                                        |                         |    |    |   |   |
| SGO_1005 | 0.152                  | 4.203                | 0.0501  | 0.3034  | 4.000  | 5.000   | 4.8306     | 5.0000   | Bcl-2 family protein                                   |                         |    |    |   |   |
|          |                        |                      |         |         | 3.500  | 3.500   | 4.8191     | 3.7687   |                                                        |                         |    |    |   |   |
| SGO_1009 | -0.925                 | 8.563                | 0.0020  | 0.0047  | 46.000 | 115.000 | 55.5524    | 115.0000 | rfbA-1; glucose-1-phosphate thymidyltransferase        |                         |    |    |   |   |
|          |                        |                      |         |         | 55.000 | 122.500 | 75.7285    | 131.9055 |                                                        |                         |    |    |   |   |
| SGO_1010 | 0.100                  | 6.619                | 0.0511  | 0.3146  | 21.500 | 26.000  | 25.9647    | 26.0000  | rmIC; dTDP-4-keto-6-deoxyglucose-3,5-epimerase         |                         |    |    |   |   |
|          |                        |                      |         |         | 18.000 | 20.000  | 24.7839    | 21.5356  |                                                        |                         |    |    |   |   |
| SGO_1011 | -1.735                 | 8.174                | 0.0028  | 0.0076  | 25.500 | 90.500  | 30.7953    | 90.5000  | rfbB-1; dTDP-glucose 4,6-dehydratase                   |                         |    |    |   |   |
|          |                        |                      |         |         | 25.500 | 123.000 | 35.1105    | 132.4439 |                                                        |                         |    |    |   |   |
| SGO_1012 | -1.048                 | 8.277                | 0.0001  | 0.0000  | 41.000 | 102.500 | 49.5141    | 102.5000 | galE-1; UDP-glucose 4-epimerase                        |                         |    |    |   |   |
|          |                        |                      |         |         | 37.500 | 99.000  | 51.6331    | 106.6012 |                                                        |                         |    |    |   |   |

 Show detected proteins only Show all proteinsProteins found:  
584 Filter by category:

ABC Transporter

Test

Cutoff

q-Value

.005

p-Value

|             | Signif | Direction | Applies To   |
|-------------|--------|-----------|--------------|
| Red         | yes    | +         | ratios, bars |
| Yellow      | no     | n/a       | bars         |
| Green       | yes    | -         | ratios, bars |
| Pink        | yes    | +         | p-, q-Values |
| Light Green | yes    | -         | p-, q-Values |

Dot Plots Dot Plots

Summary Table

SgFn vs Sg

SgPg vs Sg

SgPgFn vs Sg

SgPg vs SgFn

SgPgFn vs SgFn

SgPgFn vs SgPg

Coverage

SgPgFn vs SgFn

Raw

Normalized

Log<sub>2</sub> Ratios

| Protein  | SgPgFn vs SgFn         |                      |         |         | Raw     |        | Normalized |         | Description                                            | Log <sub>2</sub> Ratios |    |    |   |   |
|----------|------------------------|----------------------|---------|---------|---------|--------|------------|---------|--------------------------------------------------------|-------------------------|----|----|---|---|
|          | Log <sub>2</sub> Ratio | Log <sub>2</sub> Sum | q-Value | p-Value | SgPgFn  | SgFn   | SgPgFn     | SgFn    |                                                        | -6                      | -4 | -2 | 0 | 2 |
| SGO_1013 | 1.040                  | 3.303                |         |         | 5.500   |        | 6.6421     |         | Glycosyltransferase involved in cell wall biogenesis   |                         |    |    |   |   |
|          |                        |                      |         |         |         | 3.000  |            | 3.2303  |                                                        |                         |    |    |   |   |
| SGO_1016 | 0.272                  | 2.464                |         |         | 2.500   | 2.500  | 3.0192     | 2.5000  | putative glycosyltransferase                           |                         |    |    |   |   |
|          |                        |                      |         |         |         |        |            |         |                                                        |                         |    |    |   |   |
| SGO_1019 | -0.835                 | 2.334                |         |         | 1.500   |        | 1.8115     |         | glycosyl transferase                                   |                         |    |    |   |   |
|          |                        |                      |         |         |         | 3.000  |            | 3.2303  |                                                        |                         |    |    |   |   |
| SGO_1020 | -0.622                 | 6.999                | 0.0020  | 0.0046  | 23.000  | 37.000 | 27.7762    | 37.0000 | rfbD; dTDP-4-dehydrorhamnose reductase                 |                         |    |    |   |   |
|          |                        |                      |         |         | 16.500  | 37.500 | 22.7186    | 40.3792 |                                                        |                         |    |    |   |   |
| SGO_1025 | 0.495                  | 4.844                | 0.0527  | 0.3287  | 8.500   | 8.500  | 10.2651    | 8.5000  | rgp; glycosyltransferase                               |                         |    |    |   |   |
|          |                        |                      |         |         | 4.500   | 3.500  | 6.1960     | 3.7687  |                                                        |                         |    |    |   |   |
| SGO_1026 | -1.260                 | 5.145                | 0.0030  | 0.0084  | 4.000   | 10.500 | 4.8306     | 10.5000 | rhamnosyltransferase                                   |                         |    |    |   |   |
|          |                        |                      |         |         | 4.000   | 13.500 | 5.5075     | 14.5365 |                                                        |                         |    |    |   |   |
| SGO_1031 | -0.479                 | 3.944                | 0.0246  | 0.1287  | 2.000   | 4.000  | 2.4153     | 4.0000  | cmk; cytidylate kinase                                 |                         |    |    |   |   |
|          |                        |                      |         |         | 3.000   | 4.500  | 4.1306     | 4.8455  |                                                        |                         |    |    |   |   |
| SGO_1033 | -0.273                 | 5.973                | 0.0937  | 0.6504  | 7.500   | 17.500 | 9.0575     | 17.5000 | rpmI; ribosomal protein L35                            |                         |    |    |   |   |
|          |                        |                      |         |         | 15.000  | 14.500 | 20.6532    | 15.6133 |                                                        |                         |    |    |   |   |
| SGO_1034 | 0.310                  | 8.455                | 0.0481  | 0.2893  | 108.000 | 79.000 | 130.4273   | 79.0000 | rplT; ribosomal protein L20                            |                         |    |    |   |   |
|          |                        |                      |         |         | 49.500  | 68.000 | 68.1557    | 73.2210 |                                                        |                         |    |    |   |   |
| SGO_1035 | -0.653                 | 5.126                | 0.0027  | 0.0070  | 5.000   | 10.000 | 6.0383     | 10.0000 | gloA; lactoylglutathione lyase                         |                         |    |    |   |   |
|          |                        |                      |         |         | 5.500   | 10.500 | 7.5729     | 11.3062 |                                                        |                         |    |    |   |   |
| SGO_1036 | -2.060                 | 5.362                | 0.0045  | 0.0142  | 3.000   | 21.000 | 3.6230     | 21.0000 | amino acid ABC transporter, ATP-binding protein SP1242 |                         |    |    |   |   |
|          |                        |                      |         |         | 3.000   | 11.500 | 4.1306     | 12.3830 |                                                        |                         |    |    |   |   |
| SGO_1038 | -0.187                 | 4.477                | 0.0694  | 0.4605  | 3.500   | 7.000  | 4.2268     | 7.0000  | uvrB; excinuclease ABC, B subunit                      |                         |    |    |   |   |
|          |                        |                      |         |         | 4.500   | 4.500  | 6.1960     | 4.8455  |                                                        |                         |    |    |   |   |

- Show detected proteins only  
 Show all proteins

Proteins found:  
584

Filter by category:

ABC Transporter

Test

Cutoff

q-Value

.005

p-Value

|             | Signif | Direction | Applies To   |
|-------------|--------|-----------|--------------|
| Red         | yes    | +         | ratios, bars |
| Yellow      | no     | n/a       | bars         |
| Green       | yes    | -         | ratios, bars |
| Pink        | yes    | +         | p-, q-Values |
| Light Green | yes    | -         | p-, q-Values |

Dot Plots Dot Plots

Summary Table

SgFn vs Sg

SgPg vs Sg

SgPgFn vs Sg

SgPg vs SgFn

SgPgFn vs SgFn

SgPgFn vs SgPg

Coverage

SgPgFn vs SgFn

Raw

Normalized

Log<sub>2</sub> Ratios

| Protein  | SgPgFn vs SgFn         |                      |         |         | Raw     |          | Normalized |           | Description                                                                                                             | Log <sub>2</sub> Ratios |    |    |   |   |
|----------|------------------------|----------------------|---------|---------|---------|----------|------------|-----------|-------------------------------------------------------------------------------------------------------------------------|-------------------------|----|----|---|---|
|          | Log <sub>2</sub> Ratio | Log <sub>2</sub> Sum | q-Value | p-Value | SgPgFn  | SgFn     | SgPgFn     | SgFn      |                                                                                                                         | -6                      | -4 | -2 | 0 | 2 |
| SGO_1047 | 1.697                  | 3.631                | 0.0356  | 0.2046  | 5.500   |          | 6.6421     |           | hypothetical protein SGO_1047                                                                                           |                         |    |    |   |   |
|          |                        |                      |         |         | 3.000   | 1.500    | 4.1306     | 1.6152    |                                                                                                                         |                         |    |    |   |   |
| SGO_1050 | -0.230                 | 2.581                |         |         |         |          |            |           | ribF; riboflavin biosynthesis protein RibF                                                                              |                         |    |    |   |   |
|          |                        |                      |         |         | 2.000   | 3.000    | 2.7538     | 3.2303    |                                                                                                                         |                         |    |    |   |   |
| SGO_1059 | 2.447                  | 5.537                | 0.0001  | 0.0000  | 16.500  | 4.000    | 19.9264    | 4.0000    | pstB; Phosphate import ATP-binding protein<br>pstB 1 (Phosphate-transporting ATPase 1)<br>(ABC phosphate transporter 1) |                         |    |    |   |   |
|          |                        |                      |         |         | 14.000  | 3.000    | 19.2764    | 3.2303    |                                                                                                                         |                         |    |    |   |   |
| SGO_1060 | 0.365                  | 5.333                | 0.0135  | 0.0606  | 9.000   | 7.500    | 10.8689    | 7.5000    | phosphate transport system regulatory<br>protein                                                                        |                         |    |    |   |   |
|          |                        |                      |         |         | 8.500   | 9.500    | 11.7035    | 10.2294   |                                                                                                                         |                         |    |    |   |   |
| SGO_1065 | -0.231                 | 4.888                | 0.0351  | 0.1995  | 5.000   | 9.000    | 6.0383     | 9.0000    | hypothetical protein SGO_1065                                                                                           |                         |    |    |   |   |
|          |                        |                      |         |         | 5.500   | 6.500    | 7.5729     | 6.9991    |                                                                                                                         |                         |    |    |   |   |
| SGO_1069 | -0.094                 | 7.585                | 0.0233  | 0.1204  | 36.500  | 49.000   | 44.0796    | 49.0000   | membrane alanyl aminopeptidase                                                                                          |                         |    |    |   |   |
|          |                        |                      |         |         | 35.500  | 46.500   | 48.8793    | 50.0702   |                                                                                                                         |                         |    |    |   |   |
| SGO_1079 | -1.692                 | 6.333                | 0.0101  | 0.0421  | 7.000   | 20.000   | 8.4536     | 20.0000   | pdp; pyrimidine-nucleoside phosphorylase                                                                                |                         |    |    |   |   |
|          |                        |                      |         |         | 7.000   | 39.500   | 9.6382     | 42.5328   |                                                                                                                         |                         |    |    |   |   |
| SGO_1080 | -0.109                 | 7.094                | 0.0180  | 0.0847  | 26.500  | 37.000   | 32.0030    | 37.0000   | deoC; deoxyribose-phosphate aldolase                                                                                    |                         |    |    |   |   |
|          |                        |                      |         |         | 24.500  | 31.500   | 33.7336    | 33.9186   |                                                                                                                         |                         |    |    |   |   |
| SGO_1082 | 0.686                  | 11.027               | 0.0202  | 0.0984  | 690.500 | 443.000  | 833.8895   | 443.0000  | lipoprotein                                                                                                             |                         |    |    |   |   |
|          |                        |                      |         |         | 340.500 | 316.500  | 468.8284   | 340.8007  |                                                                                                                         |                         |    |    |   |   |
| SGO_1083 | 0.463                  | 7.643                | 0.0001  | 0.0000  | 48.000  | 41.500   | 57.9677    | 41.5000   | sugar ABC transporter, ATP-binding protein<br>SP0846                                                                    |                         |    |    |   |   |
|          |                        |                      |         |         | 42.000  | 39.500   | 57.8291    | 42.5328   |                                                                                                                         |                         |    |    |   |   |
| SGO_1096 | -4.048                 | 12.301               | 0.0002  | 0.0001  | 140.000 | 2269.000 | 169.0724   | 2269.0000 | butA; acetoin dehydrogenase                                                                                             |                         |    |    |   |   |
|          |                        |                      |         |         | 88.500  | 2308.500 | 121.8541   | 2485.7454 |                                                                                                                         |                         |    |    |   |   |
| SGO_1098 | -2.043                 | 5.516                | 0.0001  | 0.0000  | 4.000   | 18.500   | 4.8306     | 18.5000   | proA; gamma-glutamyl phosphate reductase                                                                                |                         |    |    |   |   |
|          |                        |                      |         |         | 3.000   | 17.000   | 4.1306     | 18.3053   |                                                                                                                         |                         |    |    |   |   |

- Show detected proteins only  
 Show all proteins

Proteins found:  
584

Filter by category:

ABC Transporter

Test

Cutoff

q-Value

.005

p-Value

|             | Signif | Direction | Applies To                |
|-------------|--------|-----------|---------------------------|
| Red         | yes    | +         | ratios, bars              |
| Yellow      | no     | n/a       | bars                      |
| Green       | yes    | -         | ratios, bars              |
| Pink        | yes    | +         | p <sup>-</sup> , q-Values |
| Light Green | yes    | -         | p <sup>-</sup> , q-Values |

Dot Plots Dot Plots



Summary Table

SgFn vs Sg

SgPg vs Sg

SgPgFn vs Sg

SgPg vs SgFn

SgPgFn vs SgFn

SgPgFn vs SgPg

Coverage

SgPgFn vs SgFn

Raw

Normalized

Log<sub>2</sub> Ratios

| Protein  | SgPgFn vs SgFn         |                      |         |         | Raw    |        | Normalized |         | Description                                          | Log <sub>2</sub> Ratios |    |    |   |   |   |   |
|----------|------------------------|----------------------|---------|---------|--------|--------|------------|---------|------------------------------------------------------|-------------------------|----|----|---|---|---|---|
|          | Log <sub>2</sub> Ratio | Log <sub>2</sub> Sum | q-Value | p-Value | SgPgFn | SgFn   | SgPgFn     | SgFn    |                                                      | -6                      | -4 | -2 | 0 | 2 | 4 | 6 |
| SGO_1104 | 0.750                  | 3.115                |         |         | 4.500  |        | 5.4345     |         | carB; carbamoyl-phosphate synthase, large subunit    |                         |    |    |   |   |   |   |
|          |                        |                      |         |         |        | 3.000  |            | 3.2303  |                                                      |                         |    |    |   |   |   |   |
| SGO_1107 | 0.770                  | 2.127                |         |         |        |        |            |         | PyrR bifunctional protein                            |                         |    |    |   |   |   |   |
|          |                        |                      |         |         | 2.000  | 1.500  | 2.7538     | 1.6152  |                                                      |                         |    |    |   |   |   |   |
| SGO_1109 | 1.035                  | 6.157                | 0.0011  | 0.0017  | 21.500 | 11.500 | 25.9647    | 11.5000 | pyrB; aspartate carbamoyltransferase                 |                         |    |    |   |   |   |   |
|          |                        |                      |         |         | 16.000 | 11.000 | 22.0301    | 11.8446 |                                                      |                         |    |    |   |   |   |   |
| SGO_1111 | -0.366                 | 3.112                | 0.0209  | 0.1038  | 2.000  | 3.000  | 2.4153     | 3.0000  | fruR; phosphotransferase system repressor            |                         |    |    |   |   |   |   |
|          |                        |                      |         |         |        | 3.000  |            | 3.2303  |                                                      |                         |    |    |   |   |   |   |
| SGO_1112 | -0.983                 | 3.774                | 0.0214  | 0.1074  |        | 5.000  |            | 5.0000  | fruB; 1-phosphofructokinase                          |                         |    |    |   |   |   |   |
|          |                        |                      |         |         | 2.000  | 5.500  | 2.7538     | 5.9223  |                                                      |                         |    |    |   |   |   |   |
| SGO_1113 | 0.779                  | 6.817                | 0.0182  | 0.0864  | 26.000 | 30.000 | 31.3992    | 30.0000 | fruA; PTS system, fructose specific IIABC components |                         |    |    |   |   |   |   |
|          |                        |                      |         |         | 27.500 | 12.500 | 37.8643    | 13.4597 |                                                      |                         |    |    |   |   |   |   |
| SGO_1114 | 0.299                  | 4.065                | 0.0612  | 0.3976  | 3.500  | 5.000  | 4.2268     | 5.0000  | Protein of unknown function (DUF1149) superfamily    |                         |    |    |   |   |   |   |
|          |                        |                      |         |         | 3.500  | 2.500  | 4.8191     | 2.6919  |                                                      |                         |    |    |   |   |   |   |
| SGO_1116 | -0.021                 | 6.214                | 0.1274  | 0.9159  | 13.500 | 19.500 | 16.3034    | 19.5000 | dapB; dihydrodipicolinate reductase                  |                         |    |    |   |   |   |   |
|          |                        |                      |         |         | 15.000 | 16.500 | 20.6532    | 17.7669 |                                                      |                         |    |    |   |   |   |   |
| SGO_1120 | -0.861                 | 7.879                | 0.0041  | 0.0122  | 29.500 | 67.000 | 35.6260    | 67.0000 | guaA; GMP synthase                                   |                         |    |    |   |   |   |   |
|          |                        |                      |         |         | 35.000 | 78.500 | 48.1909    | 84.5272 |                                                      |                         |    |    |   |   |   |   |
| SGO_1123 | 0.048                  | 7.074                | 0.0814  | 0.5514  | 26.500 | 35.000 | 32.0030    | 35.0000 | ffh; signal recognition particle protein             |                         |    |    |   |   |   |   |
|          |                        |                      |         |         | 26.500 | 29.000 | 36.4874    | 31.2266 |                                                      |                         |    |    |   |   |   |   |
| SGO_1129 | -0.410                 | 5.221                | 0.0013  | 0.0022  | 7.000  | 10.500 | 8.4536     | 10.5000 | lplA; lipoate protein ligase A                       |                         |    |    |   |   |   |   |
|          |                        |                      |         |         | 5.500  | 10.000 | 7.5729     | 10.7678 |                                                      |                         |    |    |   |   |   |   |
| SGO_1130 | 2.087                  | 6.027                | 0.0001  | 0.0000  | 22.000 | 5.500  | 26.5685    | 5.5000  | dihydrolipoamide dehydrogenase                       |                         |    |    |   |   |   |   |
|          |                        |                      |         |         | 19.000 | 6.500  | 26.1608    | 6.9991  |                                                      |                         |    |    |   |   |   |   |

- Show detected proteins only  
 Show all proteins

Proteins found:  
584

Filter by category:

ABC Transporter

Test

Cutoff

q-Value

.005

p-Value

|             | Signif | Direction | Applies To   |
|-------------|--------|-----------|--------------|
| Red         | yes    | +         | ratios, bars |
| Yellow      | no     | n/a       | bars         |
| Green       | yes    | -         | ratios, bars |
| Pink        | yes    | +         | p-, q-Values |
| Light Green | yes    | -         | p-, q-Values |

Dot Plots Dot Plots

Summary Table

SgFn vs Sg

SgPg vs Sg

SgPgFn vs Sg

SgPg vs SgFn

SgPgFn vs SgFn

SgPgFn vs SgPg

Coverage

SgPgFn vs SgFn

Raw

Normalized

Log<sub>2</sub> Ratios

| Protein  | SgPgFn vs SgFn         |                      |         |         | Raw    |         | Normalized |          | Description                                                | Log <sub>2</sub> Ratios |    |    |   |   |   |   |
|----------|------------------------|----------------------|---------|---------|--------|---------|------------|----------|------------------------------------------------------------|-------------------------|----|----|---|---|---|---|
|          | Log <sub>2</sub> Ratio | Log <sub>2</sub> Sum | q-Value | p-Value | SgPgFn | SgFn    | SgPgFn     | SgFn     |                                                            | -6                      | -4 | -2 | 0 | 2 | 4 | 6 |
| SGO_1131 | 1.791                  | 4.327                | 0.0283  | 0.1530  | 6.000  | 2.500   | 7.2460     | 2.5000   | sucB; dihydrolipoamide S-acetyltransferase                 |                         |    |    |   |   |   |   |
|          |                        |                      |         |         | 7.500  |         | 10.3266    |          |                                                            |                         |    |    |   |   |   |   |
| SGO_1133 | -0.255                 | 4.367                | 0.0958  | 0.6663  | 4.000  |         | 4.8306     |          | acoA; acetoin dehydrogenase                                |                         |    |    |   |   |   |   |
|          |                        |                      |         |         | 6.000  | 7.000   | 8.2613     | 7.5375   |                                                            |                         |    |    |   |   |   |   |
| SGO_1134 | -2.199                 | 4.884                | 0.0423  | 0.2490  |        |         | 9.000      | 9.0000   | hypothetical protein SGO_1134                              |                         |    |    |   |   |   |   |
|          |                        |                      |         |         | 2.000  | 16.500  | 2.7538     | 17.7669  |                                                            |                         |    |    |   |   |   |   |
| SGO_1139 | 0.176                  | 5.568                | 0.0074  | 0.0275  | 10.000 | 11.500  | 12.0766    | 11.5000  | GTP-binding protein                                        |                         |    |    |   |   |   |   |
|          |                        |                      |         |         | 9.500  | 10.000  | 13.0804    | 10.7678  |                                                            |                         |    |    |   |   |   |   |
| SGO_1140 | -0.194                 | 7.274                | 0.0080  | 0.0304  | 29.500 | 39.000  | 35.6260    | 39.0000  | clpX; ATP-dependent Clp protease, ATP-binding subunit ClpX |                         |    |    |   |   |   |   |
|          |                        |                      |         |         | 26.500 | 40.500  | 36.4874    | 43.6096  |                                                            |                         |    |    |   |   |   |   |
| SGO_1141 | -1.932                 | 4.762                | 0.0407  | 0.2387  | 2.500  | 8.500   | 3.0192     | 8.5000   | folA; dihydrofolate reductase                              |                         |    |    |   |   |   |   |
|          |                        |                      |         |         |        | 14.500  |            | 15.6133  |                                                            |                         |    |    |   |   |   |   |
| SGO_1143 | 0.407                  | 3.951                | 0.0709  | 0.4709  | 5.000  | 3.500   | 6.0383     | 3.5000   | thyA; thymidylate synthase                                 |                         |    |    |   |   |   |   |
|          |                        |                      |         |         |        | 5.500   |            | 5.9223   |                                                            |                         |    |    |   |   |   |   |
| SGO_1144 | -0.562                 | 9.079                | 0.0024  | 0.0060  | 98.500 | 152.500 | 118.9545   | 152.5000 | glcK; glucokinase                                          |                         |    |    |   |   |   |   |
|          |                        |                      |         |         | 72.500 | 157.500 | 99.8240    | 169.5928 |                                                            |                         |    |    |   |   |   |   |
| SGO_1150 | -0.014                 | 3.870                | 0.1271  | 0.9104  |        | 5.500   |            | 5.5000   | hypothetical protein SGO_1150                              |                         |    |    |   |   |   |   |
|          |                        |                      |         |         | 3.500  | 4.000   | 4.8191     | 4.3071   |                                                            |                         |    |    |   |   |   |   |
| SGO_1151 | -0.674                 | 9.082                | 0.0002  | 0.0001  | 84.000 | 165.000 | 101.4435   | 165.0000 | glyA; serine hydroxymethyltransferase                      |                         |    |    |   |   |   |   |
|          |                        |                      |         |         | 78.000 | 156.000 | 107.3968   | 167.9776 |                                                            |                         |    |    |   |   |   |   |
| SGO_1154 | 0.396                  | 6.592                | 0.0614  | 0.4010  | 20.500 | 30.000  | 24.7570    | 30.0000  | prfA; peptide chain release factor 1                       |                         |    |    |   |   |   |   |
|          |                        |                      |         |         | 20.500 | 12.500  | 28.2261    | 13.4597  |                                                            |                         |    |    |   |   |   |   |
| SGO_1155 | 1.283                  | 3.830                | 0.0310  | 0.1716  |        | 4.500   |            | 4.5000   | tdk; thymidine kinase                                      |                         |    |    |   |   |   |   |
|          |                        |                      |         |         | 5.500  | 2.000   | 7.5729     | 2.1536   |                                                            |                         |    |    |   |   |   |   |

- Show detected proteins only  
 Show all proteins

Proteins found:  
584

Filter by category:

ABC Transporter

Test

Cutoff

q-Value

.005

p-Value

|             | Signif | Direction | Applies To   |
|-------------|--------|-----------|--------------|
| Red         | yes    | +         | ratios, bars |
| Yellow      | no     | n/a       | bars         |
| Green       | yes    | -         | ratios, bars |
| Pink        | yes    | +         | p-, q-Values |
| Light Green | yes    | -         | p-, q-Values |

Dot Plots Dot Plots

Summary Table

SgFn vs Sg

SgPg vs Sg

SgPgFn vs Sg

SgPg vs SgFn

SgPgFn vs SgFn

SgPgFn vs SgPg

Coverage

SgPgFn vs SgFn

Raw

Normalized

Log<sub>2</sub> Ratios

| Protein  | SgPgFn vs SgFn         |                      |         |         | Raw     |         | Normalized |          | Description                               | Log <sub>2</sub> Ratios |    |    |   |   |
|----------|------------------------|----------------------|---------|---------|---------|---------|------------|----------|-------------------------------------------|-------------------------|----|----|---|---|
|          | Log <sub>2</sub> Ratio | Log <sub>2</sub> Sum | q-Value | p-Value | SgPgFn  | SgFn    | SgPgFn     | SgFn     |                                           | -6                      | -4 | -2 | 0 | 2 |
| SGO_1167 | 0.833                  | 6.143                | 0.0129  | 0.0571  | 14.000  | 13.000  | 16.9072    | 13.0000  | nox; NADH oxidase                         |                         |    |    |   |   |
|          |                        |                      |         |         | 21.000  | 11.000  | 28.9145    | 11.8446  |                                           |                         |    |    |   |   |
| SGO_1169 | 1.302                  | 6.132                | 0.0011  | 0.0015  | 20.500  | 12.500  | 24.7570    | 12.5000  | NADPH-dependent FMN reductase             |                         |    |    |   |   |
|          |                        |                      |         |         | 18.000  | 7.500   | 24.7839    | 8.0758   |                                           |                         |    |    |   |   |
| SGO_1170 | 1.328                  | 6.638                | 0.0006  | 0.0005  | 31.000  | 15.500  | 37.4375    | 15.5000  | NADPH-dependent FMN reductase             |                         |    |    |   |   |
|          |                        |                      |         |         | 24.500  | 12.000  | 33.7336    | 12.9214  |                                           |                         |    |    |   |   |
| SGO_1185 | 0.498                  | 3.270                | 0.0501  | 0.3038  | 2.500   | 2.500   | 3.0192     | 2.5000   | acetyltransferase, GNAT family            |                         |    |    |   |   |
|          |                        |                      |         |         | 3.000   |         | 4.1306     |          |                                           |                         |    |    |   |   |
| SGO_1189 | -0.877                 | 6.105                | 0.0154  | 0.0708  | 15.000  | 20.000  | 18.1149    | 20.0000  | lipoprotein, putative                     |                         |    |    |   |   |
|          |                        |                      |         |         | 5.500   | 21.500  | 7.5729     | 23.1508  |                                           |                         |    |    |   |   |
| SGO_1191 | 1.746                  | 10.556               | 0.0004  | 0.0002  | 454.000 | 178.000 | 548.2778   | 178.0000 | rpL; ribosomal protein L7/L12             |                         |    |    |   |   |
|          |                        |                      |         |         | 444.500 | 155.500 | 612.0242   | 167.4392 |                                           |                         |    |    |   |   |
| SGO_1192 | 0.112                  | 7.996                | 0.0872  | 0.5997  | 56.500  | 50.500  | 68.2328    | 50.5000  | BL5; 50S ribosomal protein L10            |                         |    |    |   |   |
|          |                        |                      |         |         | 46.000  | 68.000  | 63.3366    | 73.2210  |                                           |                         |    |    |   |   |
| SGO_1193 | -2.230                 | 5.464                | 0.0004  | 0.0003  | 3.000   | 17.000  | 3.6230     | 17.0000  | gid; Glucose inhibited division protein A |                         |    |    |   |   |
|          |                        |                      |         |         | 3.000   | 18.000  | 4.1306     | 19.3820  |                                           |                         |    |    |   |   |
| SGO_1197 | 0.163                  | 5.590                | 0.0770  | 0.5164  | 10.000  | 9.000   | 12.0766    | 9.0000   | topA; DNA topoisomerase I                 |                         |    |    |   |   |
|          |                        |                      |         |         | 9.500   | 13.000  | 13.0804    | 13.9981  |                                           |                         |    |    |   |   |
| SGO_1203 | -0.930                 | 6.041                | 0.0020  | 0.0048  | 8.500   | 19.500  | 10.2651    | 19.5000  | anaerobic ribonucleotide reductase        |                         |    |    |   |   |
|          |                        |                      |         |         | 9.000   | 22.000  | 12.3919    | 23.6891  |                                           |                         |    |    |   |   |
| SGO_1205 | -0.368                 | 4.202                | 0.0507  | 0.3092  | 3.500   | 7.500   | 4.2268     | 7.5000   | dapA; dihydrodipicolinate synthase        |                         |    |    |   |   |
|          |                        |                      |         |         | 2.500   | 3.000   | 3.4422     | 3.2303   |                                           |                         |    |    |   |   |
| SGO_1206 | -0.043                 | 6.619                | 0.0817  | 0.5556  | 19.000  | 23.500  | 22.9455    | 23.5000  | asd; aspartate-semialdehyde dehydrogenase |                         |    |    |   |   |
|          |                        |                      |         |         | 18.500  | 24.500  | 25.4723    | 26.3811  |                                           |                         |    |    |   |   |

- Show detected proteins only  
 Show all proteins

Proteins found:  
584

Filter by category:

ABC Transporter

Test

Cutoff

q-Value

.005

p-Value

|             | Signif | Direction | Applies To   |
|-------------|--------|-----------|--------------|
| Red         | yes    | +         | ratios, bars |
| Yellow      | no     | n/a       | bars         |
| Green       | yes    | -         | ratios, bars |
| Pink        | yes    | +         | p-, q-Values |
| Light Green | yes    | -         | p-, q-Values |

Dot Plots Dot Plots

Summary Table

SgFn vs Sg

SgPg vs Sg

SgPgFn vs Sg

SgPg vs SgFn

SgPgFn vs SgFn

SgPgFn vs SgPg

Coverage

SgPgFn vs SgFn

Raw

Normalized

Log<sub>2</sub> Ratios

| Protein  | SgPgFn vs SgFn         |                      |         |         | Raw     |         |          |          | Normalized |      |        |      | Description | Log <sub>2</sub> Ratios |    |    |   |   |   |   |  |  |  |  |  |  |
|----------|------------------------|----------------------|---------|---------|---------|---------|----------|----------|------------|------|--------|------|-------------|-------------------------|----|----|---|---|---|---|--|--|--|--|--|--|
|          | Log <sub>2</sub> Ratio | Log <sub>2</sub> Sum | q-Value | p-Value | SgPgFn  | SgFn    | SgPgFn   | SgFn     | SgPgFn     | SgFn | SgPgFn | SgFn |             | -6                      | -4 | -2 | 0 | 2 | 4 | 6 |  |  |  |  |  |  |
| SGO_1210 | -2.125                 | 4.887                | 0.0218  | 0.1097  | 2.500   | 11.500  | 3.0192   | 11.5000  |            |      |        |      |             |                         |    |    |   |   |   |   |  |  |  |  |  |  |
|          |                        |                      |         |         |         |         |          |          |            |      |        |      |             |                         |    |    |   |   |   |   |  |  |  |  |  |  |
| SGO_1215 | -0.753                 | 9.229                | 0.0009  | 0.0010  | 92.500  | 178.000 | 111.7086 | 178.0000 |            |      |        |      |             |                         |    |    |   |   |   |   |  |  |  |  |  |  |
|          |                        |                      |         |         | 81.000  | 184.500 | 111.5275 | 198.6658 |            |      |        |      |             |                         |    |    |   |   |   |   |  |  |  |  |  |  |
| SGO_1216 | -0.222                 | 6.206                | 0.0131  | 0.0582  | 14.500  | 21.500  | 17.5111  | 21.5000  |            |      |        |      |             |                         |    |    |   |   |   |   |  |  |  |  |  |  |
|          |                        |                      |         |         | 12.000  | 17.000  | 16.5226  | 18.3053  |            |      |        |      |             |                         |    |    |   |   |   |   |  |  |  |  |  |  |
| SGO_1219 | -1.048                 | 7.136                | 0.0161  | 0.0745  | 16.500  | 31.500  | 19.9264  | 31.5000  |            |      |        |      |             |                         |    |    |   |   |   |   |  |  |  |  |  |  |
|          |                        |                      |         |         | 17.500  | 60.500  | 24.0954  | 65.1452  |            |      |        |      |             |                         |    |    |   |   |   |   |  |  |  |  |  |  |
| SGO_1224 | 1.233                  | 7.325                | 0.0011  | 0.0015  | 42.500  | 23.500  | 51.3256  | 23.5000  |            |      |        |      |             |                         |    |    |   |   |   |   |  |  |  |  |  |  |
|          |                        |                      |         |         | 44.500  | 22.500  | 61.2713  | 24.2275  |            |      |        |      |             |                         |    |    |   |   |   |   |  |  |  |  |  |  |
| SGO_1225 | 0.021                  | 4.378                | 0.1295  | 0.9390  | 4.000   | 4.000   | 4.8306   | 4.0000   |            |      |        |      |             |                         |    |    |   |   |   |   |  |  |  |  |  |  |
|          |                        |                      |         |         | 4.000   | 6.000   | 5.5075   | 6.4607   |            |      |        |      |             |                         |    |    |   |   |   |   |  |  |  |  |  |  |
| SGO_1226 | -0.323                 | 5.511                | 0.0327  | 0.1832  | 8.000   | 10.000  | 9.6613   | 10.0000  |            |      |        |      |             |                         |    |    |   |   |   |   |  |  |  |  |  |  |
|          |                        |                      |         |         | 7.500   | 14.500  | 10.3266  | 15.6133  |            |      |        |      |             |                         |    |    |   |   |   |   |  |  |  |  |  |  |
| SGO_1231 | -1.234                 | 6.445                | 0.0028  | 0.0078  | 10.500  | 35.500  | 12.6804  | 35.5000  |            |      |        |      |             |                         |    |    |   |   |   |   |  |  |  |  |  |  |
|          |                        |                      |         |         | 9.500   | 24.000  | 13.0804  | 25.8427  |            |      |        |      |             |                         |    |    |   |   |   |   |  |  |  |  |  |  |
| SGO_1232 | 0.065                  | 10.119               | 0.0078  | 0.0295  | 234.000 | 277.000 | 282.5925 | 277.0000 |            |      |        |      |             |                         |    |    |   |   |   |   |  |  |  |  |  |  |
|          |                        |                      |         |         | 207.500 | 247.500 | 285.7031 | 266.5029 |            |      |        |      |             |                         |    |    |   |   |   |   |  |  |  |  |  |  |
| SGO_1234 | 0.997                  | 9.720                | 0.0011  | 0.0016  | 228.500 | 163.000 | 275.9504 | 163.0000 |            |      |        |      |             |                         |    |    |   |   |   |   |  |  |  |  |  |  |
|          |                        |                      |         |         | 206.000 | 112.000 | 283.6378 | 120.5993 |            |      |        |      |             |                         |    |    |   |   |   |   |  |  |  |  |  |  |
| SGO_1238 | -1.517                 | 6.634                | 0.0056  | 0.0194  | 9.000   | 46.000  | 10.8689  | 46.0000  |            |      |        |      |             |                         |    |    |   |   |   |   |  |  |  |  |  |  |
|          |                        |                      |         |         | 10.500  | 26.000  | 14.4573  | 27.9963  |            |      |        |      |             |                         |    |    |   |   |   |   |  |  |  |  |  |  |
| SGO_1239 | -0.555                 | 3.569                | 0.0403  | 0.2359  | 2.000   | 2.000   | 2.4153   | 2.0000   |            |      |        |      |             |                         |    |    |   |   |   |   |  |  |  |  |  |  |
|          |                        |                      |         |         | 1.500   | 5.000   | 2.0653   | 5.3839   |            |      |        |      |             |                         |    |    |   |   |   |   |  |  |  |  |  |  |

- Show detected proteins only  
 Show all proteins

Proteins found:  
584

Filter by category:

ABC Transporter

Test

Cutoff

q-Value

.005

p-Value

|             | Signif | Direction | Applies To   |
|-------------|--------|-----------|--------------|
| Red         | yes    | +         | ratios, bars |
| Yellow      | no     | n/a       | bars         |
| Green       | yes    | -         | ratios, bars |
| Pink        | yes    | +         | p-, q-Values |
| Light Green | yes    | -         | p-, q-Values |

Dot Plots Dot Plots

Summary Table

SgFn vs Sg

SgPg vs Sg

SgPgFn vs Sg

SgPg vs SgFn

SgPgFn vs SgFn

SgPgFn vs SgPg

Coverage

SgPgFn vs SgFn

Raw

Normalized

Log<sub>2</sub> Ratios

| Protein  | SgPgFn vs SgFn         |                      |         |         | Raw    |         | Normalized |          | Description                                                       | Log <sub>2</sub> Ratios |    |    |   |   |   |   |
|----------|------------------------|----------------------|---------|---------|--------|---------|------------|----------|-------------------------------------------------------------------|-------------------------|----|----|---|---|---|---|
|          | Log <sub>2</sub> Ratio | Log <sub>2</sub> Sum | q-Value | p-Value | SgPgFn | SgFn    | SgPgFn     | SgFn     |                                                                   | -6                      | -4 | -2 | 0 | 2 | 4 | 6 |
| SGO_1248 | -2.297                 | 5.699                | 0.0069  | 0.0249  | 3.500  | 14.500  | 4.2268     | 14.5000  | pyrC; dihydroorotase                                              |                         |    |    |   |   |   |   |
|          |                        |                      |         |         | 3.000  | 27.000  | 4.1306     | 29.0730  |                                                                   |                         |    |    |   |   |   |   |
| SGO_1253 | 0.773                  | 5.347                | 0.0134  | 0.0603  | 9.000  | 10.000  | 10.8689    | 10.0000  | pyrE; orotate phosphoribosyltransferase                           |                         |    |    |   |   |   |   |
|          |                        |                      |         |         | 10.500 | 5.000   | 14.4573    | 5.3839   |                                                                   |                         |    |    |   |   |   |   |
| SGO_1260 | 1.059                  | 6.742                | 0.0009  | 0.0010  | 32.000 | 18.000  | 38.6451    | 18.0000  | deoD; purine nucleoside phosphorylase                             |                         |    |    |   |   |   |   |
|          |                        |                      |         |         | 24.500 | 15.500  | 33.7336    | 16.6901  |                                                                   |                         |    |    |   |   |   |   |
| SGO_1263 | 0.737                  | 6.819                | 0.0083  | 0.0316  | 24.000 | 22.000  | 28.9838    | 22.0000  | purine nucleoside phosphorylase I, inosine and guanosine-specific |                         |    |    |   |   |   |   |
|          |                        |                      |         |         | 30.500 | 18.500  | 41.9949    | 19.9204  |                                                                   |                         |    |    |   |   |   |   |
| SGO_1264 | -0.269                 | 8.897                | 0.0403  | 0.2361  | 75.500 | 149.500 | 91.1784    | 149.5000 | deoB; phosphopentomutase                                          |                         |    |    |   |   |   |   |
|          |                        |                      |         |         | 91.000 | 103.000 | 125.2963   | 110.9083 |                                                                   |                         |    |    |   |   |   |   |
| SGO_1265 | 0.802                  | 6.467                | 0.0014  | 0.0026  | 21.500 | 15.500  | 25.9647    | 15.5000  | rpiA; ribose 5-phosphate isomerase                                |                         |    |    |   |   |   |   |
|          |                        |                      |         |         | 22.000 | 15.500  | 30.2914    | 16.6901  |                                                                   |                         |    |    |   |   |   |   |
| SGO_1266 | -0.405                 | 5.365                | 0.0117  | 0.0504  | 8.500  | 11.000  | 10.2651    | 11.0000  | trmE; tRNA modification GTPase TrmE                               |                         |    |    |   |   |   |   |
|          |                        |                      |         |         | 5.500  | 11.500  | 7.5729     | 12.3830  |                                                                   |                         |    |    |   |   |   |   |
| SGO_1273 | 1.678                  | 7.509                | 0.0037  | 0.0108  | 68.500 | 27.000  | 82.7247    | 27.0000  | rpoD; RNA polymerase sigma factor                                 |                         |    |    |   |   |   |   |
|          |                        |                      |         |         | 40.500 | 15.500  | 55.7637    | 16.6901  |                                                                   |                         |    |    |   |   |   |   |
| SGO_1276 | 2.077                  | 6.395                | 0.0013  | 0.0021  | 24.500 | 8.500   | 29.5877    | 8.5000   | rpsU; ribosomal protein S21                                       |                         |    |    |   |   |   |   |
|          |                        |                      |         |         | 28.000 | 7.000   | 38.5527    | 7.5375   |                                                                   |                         |    |    |   |   |   |   |
| SGO_1281 | 0.770                  | 2.127                |         |         |        |         |            |          | penicillinase repressor, putative                                 |                         |    |    |   |   |   |   |
|          |                        |                      |         |         | 2.000  | 1.500   | 2.7538     | 1.6152   |                                                                   |                         |    |    |   |   |   |   |
| SGO_1283 | 0.708                  | 6.989                | 0.0018  | 0.0041  | 32.500 | 27.500  | 39.2490    | 27.5000  | oxidoreductase                                                    |                         |    |    |   |   |   |   |
|          |                        |                      |         |         | 28.500 | 19.500  | 39.2411    | 20.9972  |                                                                   |                         |    |    |   |   |   |   |
| SGO_1284 | 0.479                  | 4.727                | 0.0518  | 0.3205  | 5.500  | 3.500   | 6.6421     | 3.5000   | thioredoxin-disulfide reductase                                   |                         |    |    |   |   |   |   |
|          |                        |                      |         |         | 6.000  | 7.500   | 8.2613     | 8.0758   |                                                                   |                         |    |    |   |   |   |   |

- Show detected proteins only  
 Show all proteins

Proteins found:  
584

Filter by category:

ABC Transporter

Test

Cutoff

q-Value

.005

p-Value

|             | Signif | Direction | Applies To   |
|-------------|--------|-----------|--------------|
| Red         | yes    | +         | ratios, bars |
| Yellow      | no     | n/a       | bars         |
| Green       | yes    | -         | ratios, bars |
| Pink        | yes    | +         | p-, q-Values |
| Light Green | yes    | -         | p-, q-Values |

Dot Plots Dot Plots

Summary Table

SgFn vs Sg

SgPg vs Sg

SgPgFn vs Sg

SgPg vs SgFn

SgPgFn vs SgFn

SgPgFn vs SgPg

Coverage

SgPgFn vs SgFn

Raw

Normalized

Log<sub>2</sub> Ratios

| Protein  | SgPgFn vs SgFn         |                      |         |         | Raw     |         | Normalized |          | Description                                         | Log <sub>2</sub> Ratios |    |    |   |   |
|----------|------------------------|----------------------|---------|---------|---------|---------|------------|----------|-----------------------------------------------------|-------------------------|----|----|---|---|
|          | Log <sub>2</sub> Ratio | Log <sub>2</sub> Sum | q-Value | p-Value | SgPgFn  | SgFn    | SgPgFn     | SgFn     |                                                     | -6                      | -4 | -2 | 0 | 2 |
| SGO_1293 | -0.058                 | 6.586                | 0.1292  | 0.9336  | 15.000  | 22.500  | 18.1149    | 22.5000  | asnS; asparaginyl-tRNA synthetase                   |                         |    |    |   |   |
|          |                        |                      |         |         | 21.500  | 24.000  | 29.6030    | 25.8427  |                                                     |                         |    |    |   |   |
| SGO_1297 | -1.140                 | 6.383                | 0.0042  | 0.0127  | 10.500  | 34.000  | 12.6804    | 34.0000  | aspC; aspartate aminotransferase                    |                         |    |    |   |   |
|          |                        |                      |         |         | 9.500   | 22.000  | 13.0804    | 23.6891  |                                                     |                         |    |    |   |   |
| SGO_1312 | -0.546                 | 7.056                | 0.0025  | 0.0065  | 25.000  | 40.000  | 30.1915    | 40.0000  | pepT; peptidase T                                   |                         |    |    |   |   |
|          |                        |                      |         |         | 17.500  | 36.000  | 24.0954    | 38.7641  |                                                     |                         |    |    |   |   |
| SGO_1323 | 1.425                  | 7.057                | 0.0003  | 0.0002  | 41.500  | 19.500  | 50.1179    | 19.5000  | rpsP; ribosomal protein S16                         |                         |    |    |   |   |
|          |                        |                      |         |         | 34.000  | 15.500  | 46.8140    | 16.6901  |                                                     |                         |    |    |   |   |
| SGO_1327 | -0.522                 | 4.460                | 0.0011  | 0.0014  | 3.500   | 6.500   | 4.2268     | 6.5000   | HAD-superfamily subfamily IIA hydrolase, TIGR01457  |                         |    |    |   |   |
|          |                        |                      |         |         | 3.500   | 6.000   | 4.8191     | 6.4607   |                                                     |                         |    |    |   |   |
| SGO_1336 | -1.119                 | 4.961                | 0.0062  | 0.0218  | 3.500   | 8.500   | 4.2268     | 8.5000   | pcrA; ATP-dependent DNA helicase PcrA               |                         |    |    |   |   |
|          |                        |                      |         |         | 4.000   | 12.000  | 5.5075     | 12.9214  |                                                     |                         |    |    |   |   |
| SGO_1339 | 0.328                  | 10.883               | 0.0048  | 0.0154  | 454.000 | 447.500 | 548.2778   | 447.5000 | pyk; pyruvate kinase                                |                         |    |    |   |   |
|          |                        |                      |         |         | 364.500 | 362.500 | 501.8736   | 390.3326 |                                                     |                         |    |    |   |   |
| SGO_1340 | -0.610                 | 9.611                | 0.0008  | 0.0008  | 124.500 | 227.000 | 150.3537   | 227.0000 | Phosphofructokinase                                 |                         |    |    |   |   |
|          |                        |                      |         |         | 115.500 | 228.000 | 159.0299   | 245.5057 |                                                     |                         |    |    |   |   |
| SGO_1342 | -0.690                 | 8.816                | 0.0033  | 0.0095  | 71.000  | 155.000 | 85.7439    | 155.0000 | ABC transporter, ATP-binding protein SP1715         |                         |    |    |   |   |
|          |                        |                      |         |         | 62.500  | 115.000 | 86.0551    | 123.8296 |                                                     |                         |    |    |   |   |
| SGO_1364 | -1.496                 | 4.199                | 0.0205  | 0.1008  |         | 7.000   |            | 7.0000   | rumA-2; 23S rRNA (uracil-5-)-methyltransferase Ruma |                         |    |    |   |   |
|          |                        |                      |         |         | 2.000   | 8.000   | 2.7538     | 8.6142   |                                                     |                         |    |    |   |   |
| SGO_1365 | -2.204                 | 4.820                | 0.0169  | 0.0791  |         | 11.500  |            | 11.5000  | transcription regulator yrfE                        |                         |    |    |   |   |
|          |                        |                      |         |         | 2.000   | 13.000  | 2.7538     | 13.9981  |                                                     |                         |    |    |   |   |
| SGO_1369 | -4.275                 | 7.170                | 0.0063  | 0.0223  | 3.000   | 72.500  | 3.6230     | 72.5000  | L-2-hydroxyisocaproate dehydrogenase                |                         |    |    |   |   |
|          |                        |                      |         |         |         | 63.000  |            | 67.8371  |                                                     |                         |    |    |   |   |

- Show detected proteins only  
 Show all proteins

Proteins found:  
584

Filter by category:

ABC Transporter

Test

Cutoff

q-Value

.005

p-Value

|             | Signif | Direction | Applies To   |
|-------------|--------|-----------|--------------|
| Red         | yes    | +         | ratios, bars |
| Yellow      | no     | n/a       | bars         |
| Green       | yes    | -         | ratios, bars |
| Pink        | yes    | +         | p-, q-Values |
| Light Green | yes    | -         | p-, q-Values |

Dot Plots Dot Plots

Summary Table

SgFn vs Sg

SgPg vs Sg

SgPgFn vs Sg

SgPg vs SgFn

SgPgFn vs SgFn

SgPgFn vs SgPg

Coverage

SgPgFn vs SgFn

Raw

Normalized

Log<sub>2</sub> Ratios

| Protein  | SgPgFn vs SgFn         |                      |         |         | Raw    |        | Normalized |         | Description                                               | Log <sub>2</sub> Ratios |    |    |   |   |
|----------|------------------------|----------------------|---------|---------|--------|--------|------------|---------|-----------------------------------------------------------|-------------------------|----|----|---|---|
|          | Log <sub>2</sub> Ratio | Log <sub>2</sub> Sum | q-Value | p-Value | SgPgFn | SgFn   | SgPgFn     | SgFn    |                                                           | -6                      | -4 | -2 | 0 | 2 |
| SGO_1370 | 0.318                  | 6.355                | 0.0193  | 0.0935  | 17.500 | 21.000 | 21.1341    | 21.0000 | Protein of unknown function (DUF964) superfamily          |                         |    |    |   |   |
|          |                        |                      |         |         | 17.500 | 14.500 | 24.0954    | 15.6133 |                                                           |                         |    |    |   |   |
| SGO_1372 | 0.770                  | 3.127                |         |         |        |        |            |         | aroC; chorismate synthase                                 |                         |    |    |   |   |
|          |                        |                      |         |         | 4.000  | 3.000  | 5.5075     | 3.2303  |                                                           |                         |    |    |   |   |
| SGO_1373 | -0.419                 | 3.082                |         |         | 3.000  |        | 3.6230     |         | aroB; 3-dehydroquinase synthase                           |                         |    |    |   |   |
|          |                        |                      |         |         |        | 4.500  |            | 4.8455  |                                                           |                         |    |    |   |   |
| SGO_1375 | 0.081                  | 4.126                | 0.0571  | 0.3649  | 5.000  | 5.500  | 6.0383     | 5.5000  | aroD; 3-dehydroquinase dehydratase, type I                |                         |    |    |   |   |
|          |                        |                      |         |         |        | 5.500  |            | 5.9223  |                                                           |                         |    |    |   |   |
| SGO_1377 | -2.269                 | 5.508                | 0.0005  | 0.0004  | 4.500  | 19.000 | 5.4345     | 19.0000 | sulfatase                                                 |                         |    |    |   |   |
|          |                        |                      |         |         | 2.000  | 17.000 | 2.7538     | 18.3053 |                                                           |                         |    |    |   |   |
| SGO_1381 | -0.925                 | 5.231                | 0.0052  | 0.0172  | 5.500  | 14.500 | 6.6421     | 14.5000 | csn1; CRISPR-associated protein, Csn1 family              |                         |    |    |   |   |
|          |                        |                      |         |         | 4.500  | 9.500  | 6.1960     | 10.2294 |                                                           |                         |    |    |   |   |
| SGO_1383 | 0.716                  | 8.032                | 0.0013  | 0.0023  | 65.500 | 44.500 | 79.1018    | 44.5000 | rplS; ribosomal protein L19                               |                         |    |    |   |   |
|          |                        |                      |         |         | 60.500 | 51.000 | 83.3014    | 54.9158 |                                                           |                         |    |    |   |   |
| SGO_1390 | -0.176                 | 4.509                | 0.0817  | 0.5555  | 5.500  | 5.000  | 6.6421     | 5.0000  | ligA; DNA ligase, NAD-dependent                           |                         |    |    |   |   |
|          |                        |                      |         |         | 3.000  | 6.500  | 4.1306     | 6.9991  |                                                           |                         |    |    |   |   |
| SGO_1397 | -0.617                 | 5.803                | 0.0048  | 0.0153  | 8.500  | 15.000 | 10.2651    | 15.0000 | map; methionine aminopeptidase, type I                    |                         |    |    |   |   |
|          |                        |                      |         |         | 8.500  | 17.500 | 11.7035    | 18.8436 |                                                           |                         |    |    |   |   |
| SGO_1400 | -0.951                 | 4.842                | 0.0202  | 0.0980  | 6.500  | 10.000 | 7.8498     | 10.0000 | murA-2; UDP-N-acetylglucosamine 1-carboxyvinyltransferase |                         |    |    |   |   |
|          |                        |                      |         |         | 2.000  | 7.500  | 2.7538     | 8.0758  |                                                           |                         |    |    |   |   |
| SGO_1414 | -0.633                 | 4.814                | 0.0183  | 0.0876  | 5.000  | 6.500  | 6.0383     | 6.5000  | rexB; putative exonuclease RexB                           |                         |    |    |   |   |
|          |                        |                      |         |         | 3.500  | 10.000 | 4.8191     | 10.7678 |                                                           |                         |    |    |   |   |
| SGO_1422 | -0.947                 | 6.844                | 0.0101  | 0.0413  | 13.000 | 29.500 | 15.6996    | 29.5000 | hypothetical protein SGO_1422                             |                         |    |    |   |   |
|          |                        |                      |         |         | 17.000 | 43.000 | 23.4070    | 46.3015 |                                                           |                         |    |    |   |   |

- Show detected proteins only  
 Show all proteins

Proteins found:  
584

Filter by category:

ABC Transporter

Test

Cutoff

q-Value

.005

p-Value

|             | Signif | Direction | Applies To   |
|-------------|--------|-----------|--------------|
| Red         | yes    | +         | ratios, bars |
| Yellow      | no     | n/a       | bars         |
| Green       | yes    | -         | ratios, bars |
| Pink        | yes    | +         | p-, q-Values |
| Light Green | yes    | -         | p-, q-Values |

Dot Plots Dot Plots

Summary Table

SgFn vs Sg

SgPg vs Sg

SgPgFn vs Sg

SgPg vs SgFn

SgPgFn vs SgFn

SgPgFn vs SgPg

Coverage

SgPgFn vs SgFn

Raw

Normalized

Log<sub>2</sub> Ratios

| Protein  | SgPgFn vs SgFn         |                      |         |         | Raw      |          |           |           | Normalized                                                                   |      |        |      | Description | Log <sub>2</sub> Ratios |    |    |   |   |   |   |
|----------|------------------------|----------------------|---------|---------|----------|----------|-----------|-----------|------------------------------------------------------------------------------|------|--------|------|-------------|-------------------------|----|----|---|---|---|---|
|          | Log <sub>2</sub> Ratio | Log <sub>2</sub> Sum | q-Value | p-Value | SgPgFn   | SgFn     | SgPgFn    | SgFn      | SgPgFn                                                                       | SgFn | SgPgFn | SgFn |             | -6                      | -4 | -2 | 0 | 2 | 4 | 6 |
| SGO_1426 | 1.167                  | 13.835               | 0.0002  | 0.0001  | 4114.000 | 2120.500 | 4968.3146 | 2120.5000 |                                                                              |      |        |      |             |                         |    |    |   |   |   |   |
|          |                        |                      |         |         | 3729.500 | 2216.500 | 5135.0827 | 2386.6817 | eno; enolase                                                                 |      |        |      |             |                         |    |    |   |   |   |   |
| SGO_1431 | -0.585                 | 8.282                | 0.0028  | 0.0076  | 51.500   | 102.000  | 62.1945   | 102.0000  |                                                                              |      |        |      |             |                         |    |    |   |   |   |   |
|          |                        |                      |         |         | 45.000   | 79.000   | 61.9597   | 85.0656   | EzrA; Septation ring formation regulator ezrA                                |      |        |      |             |                         |    |    |   |   |   |   |
| SGO_1432 | 0.058                  | 6.137                | 0.0965  | 0.6723  | 19.500   | 16.000   | 23.5494   | 16.0000   |                                                                              |      |        |      |             |                         |    |    |   |   |   |   |
|          |                        |                      |         |         | 9.500    | 16.500   | 13.0804   | 17.7669   | gyrB; DNA gyrase, B subunit                                                  |      |        |      |             |                         |    |    |   |   |   |   |
| SGO_1434 | -0.346                 | 3.106                | 0.0544  | 0.3410  | 2.000    | 3.500    | 2.4153    | 3.5000    |                                                                              |      |        |      |             |                         |    |    |   |   |   |   |
|          |                        |                      |         |         |          | 2.500    |           | 2.6919    | thiJ; 4-methyl-5(beta-hydroxyethyl)-thiazole monophosphate synthesis protein |      |        |      |             |                         |    |    |   |   |   |   |
| SGO_1439 | 0.863                  | 5.252                | 0.0027  | 0.0072  | 9.000    | 7.000    | 10.8689   | 7.0000    |                                                                              |      |        |      |             |                         |    |    |   |   |   |   |
|          |                        |                      |         |         | 10.000   | 6.000    | 13.7688   | 6.4607    | ftsX; cell division protein FtsX                                             |      |        |      |             |                         |    |    |   |   |   |   |
| SGO_1440 | -1.919                 | 6.748                | 0.0000  | 0.0000  | 9.500    | 42.500   | 11.4728   | 42.5000   |                                                                              |      |        |      |             |                         |    |    |   |   |   |   |
|          |                        |                      |         |         | 8.000    | 39.500   | 11.0151   | 42.5328   | cell-division ATP-binding protein FtsE                                       |      |        |      |             |                         |    |    |   |   |   |   |
| SGO_1441 | -0.867                 | 5.769                | 0.0186  | 0.0894  | 11.500   | 14.000   | 13.8881   | 14.0000   |                                                                              |      |        |      |             |                         |    |    |   |   |   |   |
|          |                        |                      |         |         | 4.500    | 19.000   | 6.1960    | 20.4588   | prfB; peptide chain release factor 2                                         |      |        |      |             |                         |    |    |   |   |   |   |
| SGO_1446 | -1.806                 | 4.641                | 0.0016  | 0.0034  | 3.000    | 8.500    | 3.6230    | 8.5000    |                                                                              |      |        |      |             |                         |    |    |   |   |   |   |
|          |                        |                      |         |         | 1.500    | 10.000   | 2.0653    | 10.7678   | murF; UDP-N-acetylmuramoyl-tripeptide--D-alanyl-D-alanine ligase             |      |        |      |             |                         |    |    |   |   |   |   |
| SGO_1447 | -0.426                 | 5.499                | 0.0000  | 0.0000  | 8.000    | 13.000   | 9.6613    | 13.0000   |                                                                              |      |        |      |             |                         |    |    |   |   |   |   |
|          |                        |                      |         |         | 7.000    | 12.000   | 9.6382    | 12.9214   | ddlA; D-Ala-D-Ala ligase                                                     |      |        |      |             |                         |    |    |   |   |   |   |
| SGO_1450 | -0.537                 | 4.565                | 0.0809  | 0.5462  | 2.000    | 6.000    | 2.4153    | 6.0000    |                                                                              |      |        |      |             |                         |    |    |   |   |   |   |
|          |                        |                      |         |         | 6.000    | 6.500    | 8.2613    | 6.9991    | hypothetical protein SGO_1450                                                |      |        |      |             |                         |    |    |   |   |   |   |
| SGO_1451 | 1.618                  | 6.827                | 0.0008  | 0.0008  | 33.500   | 17.000   | 40.4566   | 17.0000   |                                                                              |      |        |      |             |                         |    |    |   |   |   |   |
|          |                        |                      |         |         | 32.500   | 10.500   | 44.7487   | 11.3062   | frr; ribosome recycling factor                                               |      |        |      |             |                         |    |    |   |   |   |   |
| SGO_1452 | 0.547                  | 6.184                | 0.0004  | 0.0002  | 17.500   | 15.000   | 21.1341   | 15.0000   |                                                                              |      |        |      |             |                         |    |    |   |   |   |   |
|          |                        |                      |         |         | 16.000   | 13.500   | 22.0301   | 14.5365   | pyrH; uridylyate kinase                                                      |      |        |      |             |                         |    |    |   |   |   |   |

- Show detected proteins only  
 Show all proteins

Proteins found:  
584

Filter by category:

ABC Transporter

Test

Cutoff

q-Value

.005

p-Value

|                                          | Signif | Direction | Applies To   |
|------------------------------------------|--------|-----------|--------------|
| <span style="color: red;">■</span>       | yes    | +         | ratios, bars |
| <span style="color: yellow;">■</span>    | no     | n/a       | bars         |
| <span style="color: green;">■</span>     | yes    | -         | ratios, bars |
| <span style="color: pink;">■</span>      | yes    | +         | p-, q-Values |
| <span style="color: lightgrey;">■</span> | yes    | -         | p-, q-Values |

Dot Plots  Dot Plots



Summary Table

SgFn vs Sg

SgPg vs Sg

SgPgFn vs Sg

SgPg vs SgFn

SgPgFn vs SgFn

SgPgFn vs SgPg

Coverage

SgPgFn vs SgFn

Raw

Normalized

Log<sub>2</sub> Ratios

| Protein  | SgPgFn vs SgFn         |                      |         |         | Raw     |        | Normalized |         | Description                                     | Log <sub>2</sub> Ratios |    |    |   |   |
|----------|------------------------|----------------------|---------|---------|---------|--------|------------|---------|-------------------------------------------------|-------------------------|----|----|---|---|
|          | Log <sub>2</sub> Ratio | Log <sub>2</sub> Sum | q-Value | p-Value | SgPgFn  | SgFn   | SgPgFn     | SgFn    |                                                 | -6                      | -4 | -2 | 0 | 2 |
| SGO_1453 | 2.151                  | 4.446                | 0.0325  | 0.1818  | 10.000  |        | 12.0766    |         | glycosyl transferase, family 8 SP1766           |                         |    |    |   |   |
|          |                        |                      |         |         | 5.500   | 2.000  | 7.5729     | 2.1536  |                                                 | ■                       |    |    |   |   |
| SGO_1455 | 1.180                  | 8.929                | 0.0033  | 0.0095  | 117.500 | 72.500 | 141.9001   | 72.5000 | rplA; ribosomal protein L1                      |                         |    |    |   |   |
|          |                        |                      |         |         | 143.500 | 70.000 | 197.5826   | 75.3746 |                                                 | ■                       |    |    |   |   |
| SGO_1456 | 1.963                  | 7.189                | 0.0006  | 0.0004  | 45.500  | 18.500 | 54.9485    | 18.5000 | rplK; ribosomal protein L11                     |                         |    |    |   |   |
|          |                        |                      |         |         | 44.000  | 11.000 | 60.5828    | 11.8446 |                                                 | ■                       |    |    |   |   |
| SGO_1458 | -2.131                 | 4.587                | 0.0298  | 0.1627  | 2.000   | 13.000 | 2.4153     | 13.0000 | aha1; cation-transporting ATPase yfgQ           |                         |    |    |   |   |
|          |                        |                      |         |         |         | 8.000  |            | 8.6142  |                                                 | ■                       |    |    |   |   |
| SGO_1460 | 0.634                  | 3.467                | 0.0102  | 0.0427  | 4.000   | 3.000  | 4.8306     | 3.0000  | DNA translocase ftsK                            |                         |    |    |   |   |
|          |                        |                      |         |         |         | 3.000  |            | 3.2303  |                                                 | ■                       |    |    |   |   |
| SGO_1463 | 0.702                  | 4.869                | 0.0085  | 0.0325  | 8.000   | 7.000  | 9.6613     | 7.0000  | peptidyl-prolyl cis-trans isomerase             |                         |    |    |   |   |
|          |                        |                      |         |         | 6.000   | 4.000  | 8.2613     | 4.3071  |                                                 | ■                       |    |    |   |   |
| SGO_1465 | 1.182                  | 5.013                | 0.0011  | 0.0016  | 10.000  | 4.500  | 12.0766    | 4.5000  | ABC transporter, ATP-binding protein SP0770     |                         |    |    |   |   |
|          |                        |                      |         |         | 7.500   | 5.000  | 10.3266    | 5.3839  |                                                 | ■                       |    |    |   |   |
| SGO_1469 | 0.653                  | 6.587                | 0.0017  | 0.0038  | 22.500  | 19.000 | 27.1724    | 19.0000 | glmU; UDP-N-acetylglucosamine pyrophosphorylase |                         |    |    |   |   |
|          |                        |                      |         |         | 23.000  | 17.000 | 31.6683    | 18.3053 |                                                 | ■                       |    |    |   |   |
| SGO_1472 | -1.454                 | 3.841                | 0.0537  | 0.3353  |         | 8.500  |            | 8.5000  | acetyltransferase, GNAT family                  |                         |    |    |   |   |
|          |                        |                      |         |         | 1.500   | 3.500  | 2.0653     | 3.7687  |                                                 | ■                       |    |    |   |   |
| SGO_1486 | -0.794                 | 3.441                | 0.0286  | 0.1547  | 2.000   | 5.000  | 2.4153     | 5.0000  | beta-galactosidase                              |                         |    |    |   |   |
|          |                        |                      |         |         | 2.500   |        | 3.4422     |         |                                                 | ■                       |    |    |   |   |
| SGO_1530 | 0.299                  | 6.897                | 0.0330  | 0.1849  | 26.000  | 32.500 | 31.3992    | 32.5000 | methionine-tRNA ligase                          |                         |    |    |   |   |
|          |                        |                      |         |         | 24.500  | 20.000 | 33.7336    | 21.5356 |                                                 | ■                       |    |    |   |   |
| SGO_1531 | -0.038                 | 4.984                | 0.1282  | 0.9234  | 5.000   | 9.500  | 6.0383     | 9.5000  | xth; exodeoxyribonuclease III                   |                         |    |    |   |   |
|          |                        |                      |         |         | 7.000   | 6.000  | 9.6382     | 6.4607  |                                                 |                         |    |    |   |   |

- Show detected proteins only  
 Show all proteins

Proteins found:  
584

Filter by category:

ABC Transporter

Test

Cutoff

q-Value

.005

p-Value

|   | Signif | Direction | Applies To   |
|---|--------|-----------|--------------|
| ■ | yes    | +         | ratios, bars |
| ■ | no     | n/a       | bars         |
| ■ | yes    | -         | ratios, bars |
| ■ | yes    | +         | p-, q-Values |
| ■ | yes    | -         | p-, q-Values |

Dot Plots Dot Plots

Summary Table

SgFn vs Sg

SgPg vs Sg

SgPgFn vs Sg

SgPg vs SgFn

SgPgFn vs SgFn

SgPgFn vs SgPg

Coverage

SgPgFn vs SgFn

Raw

Normalized

Log<sub>2</sub> Ratios

| Protein  | SgPgFn vs SgFn         |                      |         |         | Raw    |         | Normalized |          | Description                                                  | Log <sub>2</sub> Ratios |    |    |   |   |   |   |
|----------|------------------------|----------------------|---------|---------|--------|---------|------------|----------|--------------------------------------------------------------|-------------------------|----|----|---|---|---|---|
|          | Log <sub>2</sub> Ratio | Log <sub>2</sub> Sum | q-Value | p-Value | SgPgFn | SgFn    | SgPgFn     | SgFn     |                                                              | -6                      | -4 | -2 | 0 | 2 | 4 | 6 |
| SGO_1534 | 0.089                  | 4.573                | 0.0468  | 0.2795  |        | 8.000   |            | 8.0000   | ArsC family                                                  |                         |    |    |   |   |   |   |
|          |                        |                      |         |         | 6.000  | 7.000   | 8.2613     | 7.5375   |                                                              |                         |    |    |   |   |   |   |
| SGO_1536 | 0.124                  | 4.493                | 0.0921  | 0.6369  | 4.000  | 6.500   | 4.8306     | 6.5000   | conserved hypothetical protein TIGR00096                     |                         |    |    |   |   |   |   |
|          |                        |                      |         |         | 5.000  | 4.000   | 6.8844     | 4.3071   |                                                              |                         |    |    |   |   |   |   |
| SGO_1539 | 0.463                  | 5.379                | 0.0278  | 0.1490  | 8.000  | 10.500  | 9.6613     | 10.5000  | tmk; thymidylate kinase                                      |                         |    |    |   |   |   |   |
|          |                        |                      |         |         | 10.500 | 6.500   | 14.4573    | 6.9991   |                                                              |                         |    |    |   |   |   |   |
| SGO_1541 | -1.869                 | 6.097                | 0.0086  | 0.0335  | 4.500  | 18.000  | 5.4345     | 18.0000  | atpC; ATP synthase F1, epsilon subunit                       |                         |    |    |   |   |   |   |
|          |                        |                      |         |         | 6.500  | 33.500  | 8.9497     | 36.0721  |                                                              |                         |    |    |   |   |   |   |
| SGO_1542 | -1.641                 | 9.594                | 0.0001  | 0.0000  | 73.000 | 290.500 | 88.1592    | 290.5000 | atpD; ATP synthase F1, beta subunit                          |                         |    |    |   |   |   |   |
|          |                        |                      |         |         | 72.500 | 273.500 | 99.8240    | 294.4992 |                                                              |                         |    |    |   |   |   |   |
| SGO_1543 | -2.938                 | 6.372                | 0.0011  | 0.0015  | 4.500  | 41.500  | 5.4345     | 41.5000  | atpG; ATP synthase F1, gamma subunit                         |                         |    |    |   |   |   |   |
|          |                        |                      |         |         | 3.000  | 29.500  | 4.1306     | 31.7650  |                                                              |                         |    |    |   |   |   |   |
| SGO_1544 | -0.260                 | 8.780                | 0.0054  | 0.0184  | 79.000 | 125.500 | 95.4052    | 125.5000 | atpA; ATP synthase F1, alpha subunit                         |                         |    |    |   |   |   |   |
|          |                        |                      |         |         | 76.000 | 106.000 | 104.6431   | 114.1386 |                                                              |                         |    |    |   |   |   |   |
| SGO_1545 | -2.489                 | 6.412                | 0.0006  | 0.0005  | 5.500  | 33.000  | 6.6421     | 33.0000  | atpH; ATP synthase F1, delta subunit                         |                         |    |    |   |   |   |   |
|          |                        |                      |         |         | 4.500  | 36.500  | 6.1960     | 39.3025  |                                                              |                         |    |    |   |   |   |   |
| SGO_1546 | -0.007                 | 6.360                | 0.1038  | 0.7314  | 16.500 | 30.000  | 19.9264    | 30.0000  | atpF; ATP synthase F0, B subunit                             |                         |    |    |   |   |   |   |
|          |                        |                      |         |         | 14.000 | 12.000  | 19.2764    | 12.9214  |                                                              |                         |    |    |   |   |   |   |
| SGO_1550 | -0.330                 | 6.657                | 0.0181  | 0.0857  | 16.500 | 25.000  | 19.9264    | 25.0000  | glgP-1; glycogen phosphorylase                               |                         |    |    |   |   |   |   |
|          |                        |                      |         |         | 18.000 | 29.000  | 24.7839    | 31.2266  |                                                              |                         |    |    |   |   |   |   |
| SGO_1551 | -1.989                 | 5.919                | 0.0006  | 0.0006  | 4.000  | 25.500  | 4.8306     | 25.5000  | glgA; Glycogen synthase                                      |                         |    |    |   |   |   |   |
|          |                        |                      |         |         | 5.500  | 21.000  | 7.5729     | 22.6124  |                                                              |                         |    |    |   |   |   |   |
| SGO_1552 | -0.218                 | 6.928                | 0.0481  | 0.2886  | 27.500 | 35.500  | 33.2107    | 35.5000  | glgD; glucose-1-phosphate<br>adenyltransferase, GlgD subunit |                         |    |    |   |   |   |   |
|          |                        |                      |         |         | 17.000 | 27.500  | 23.4070    | 29.6114  |                                                              |                         |    |    |   |   |   |   |

- Show detected proteins only  
 Show all proteins

Proteins found:  
584

Filter by category:

ABC Transporter

Test

Cutoff

q-Value

.005

p-Value

|             | Signif | Direction | Applies To   |
|-------------|--------|-----------|--------------|
| Red         | yes    | +         | ratios, bars |
| Yellow      | no     | n/a       | bars         |
| Green       | yes    | -         | ratios, bars |
| Pink        | yes    | +         | p-, q-Values |
| Light Green | yes    | -         | p-, q-Values |

Dot Plots Dot Plots

Summary Table

SgFn vs Sg

SgPg vs Sg

SgPgFn vs Sg

SgPg vs SgFn

SgPgFn vs SgFn

SgPgFn vs SgPg

Coverage

SgPgFn vs SgFn

Raw

Normalized

Log<sub>2</sub> Ratios

| Protein  | SgPgFn vs SgFn         |                      |         |         | Raw     |         | Normalized |          | Description                                                  | Log <sub>2</sub> Ratios |    |    |   |   |   |   |
|----------|------------------------|----------------------|---------|---------|---------|---------|------------|----------|--------------------------------------------------------------|-------------------------|----|----|---|---|---|---|
|          | Log <sub>2</sub> Ratio | Log <sub>2</sub> Sum | q-Value | p-Value | SgPgFn  | SgFn    | SgPgFn     | SgFn     |                                                              | -6                      | -4 | -2 | 0 | 2 | 4 | 6 |
| SGO_1553 | -0.779                 | 7.072                | 0.0074  | 0.0272  | 19.500  | 50.500  | 23.5494    | 50.5000  | glgC; glucose-1-phosphate adenylyltransferase                |                         |    |    |   |   |   |   |
|          |                        |                      |         |         | 18.500  | 32.500  | 25.4723    | 34.9953  |                                                              |                         |    |    |   |   |   |   |
| SGO_1554 | -1.219                 | 7.629                | 0.0011  | 0.0015  | 23.000  | 75.000  | 27.7762    | 75.0000  | glgB; 1,4-alpha-glucan branching enzyme                      |                         |    |    |   |   |   |   |
|          |                        |                      |         |         | 23.000  | 59.000  | 31.6683    | 63.5300  |                                                              |                         |    |    |   |   |   |   |
| SGO_1555 | -0.598                 | 10.074               | 0.0012  | 0.0019  | 163.500 | 329.500 | 197.4525   | 329.5000 | ptsI; phosphoenolpyruvate-protein phosphotransferase         |                         |    |    |   |   |   |   |
|          |                        |                      |         |         | 168.500 | 296.000 | 232.0047   | 318.7267 |                                                              |                         |    |    |   |   |   |   |
| SGO_1556 | 0.516                  | 11.147               | 0.0126  | 0.0555  | 467.500 | 515.500 | 564.5812   | 515.5000 | phosphocarrier protein HPr                                   |                         |    |    |   |   |   |   |
|          |                        |                      |         |         | 561.500 | 384.500 | 773.1194   | 414.0217 |                                                              |                         |    |    |   |   |   |   |
| SGO_1558 | -0.735                 | 7.821                | 0.0049  | 0.0160  | 34.500  | 81.000  | 41.6643    | 81.0000  | nrdE; ribonucleoside-diphosphate reductase large chain       |                         |    |    |   |   |   |   |
|          |                        |                      |         |         | 31.000  | 56.500  | 42.6834    | 60.8380  |                                                              |                         |    |    |   |   |   |   |
| SGO_1559 | 0.987                  | 7.230                | 0.0001  | 0.0000  | 41.000  | 24.500  | 49.5141    | 24.5000  | ribonucleoside-diphosphate reductase, beta subunit           |                         |    |    |   |   |   |   |
|          |                        |                      |         |         | 36.500  | 24.000  | 50.2562    | 25.8427  |                                                              |                         |    |    |   |   |   |   |
| SGO_1570 | 0.260                  | 7.934                | 0.0345  | 0.1952  | 50.000  | 65.000  | 60.3830    | 65.0000  | alaS; alanyl-tRNA synthetase                                 |                         |    |    |   |   |   |   |
|          |                        |                      |         |         | 52.500  | 43.500  | 72.2863    | 46.8399  |                                                              |                         |    |    |   |   |   |   |
| SGO_1572 | -1.262                 | 4.383                | 0.0507  | 0.3099  |         | 11.500  |            | 11.5000  | proteinase maturation protein, putative                      |                         |    |    |   |   |   |   |
|          |                        |                      |         |         | 2.500   | 5.500   | 3.4422     | 5.9223   |                                                              |                         |    |    |   |   |   |   |
| SGO_1574 | 0.145                  | 8.046                | 0.0233  | 0.1197  | 55.500  | 67.500  | 67.0251    | 67.5000  | pepF-1; oligoendopeptidase F                                 |                         |    |    |   |   |   |   |
|          |                        |                      |         |         | 52.000  | 54.000  | 71.5979    | 58.1461  |                                                              |                         |    |    |   |   |   |   |
| SGO_1580 | 1.302                  | 3.866                | 0.0039  | 0.0118  | 3.500   | 2.000   | 4.2268     | 2.0000   | PTS system, Lactose/Cellobiose specific IIB subunit          |                         |    |    |   |   |   |   |
|          |                        |                      |         |         | 4.500   | 2.000   | 6.1960     | 2.1536   |                                                              |                         |    |    |   |   |   |   |
| SGO_1587 | -0.722                 | 4.947                | 0.0075  | 0.0278  | 5.000   | 8.000   | 6.0383     | 8.0000   | queA; S-adenosylmethionine:tRNA ribosyltransferase-isomerase |                         |    |    |   |   |   |   |
|          |                        |                      |         |         | 4.000   | 10.500  | 5.5075     | 11.3062  |                                                              |                         |    |    |   |   |   |   |
| SGO_1591 | -2.896                 | 6.530                | 0.0001  | 0.0000  | 4.500   | 40.000  | 5.4345     | 40.0000  | arcC; carbamate kinase                                       |                         |    |    |   |   |   |   |
|          |                        |                      |         |         | 4.000   | 38.500  | 5.5075     | 41.4560  |                                                              |                         |    |    |   |   |   |   |

- Show detected proteins only  
 Show all proteins

Proteins found:  
584

Filter by category:

ABC Transporter

Test

Cutoff

q-Value

.005

p-Value

|             | Signif | Direction | Applies To   |
|-------------|--------|-----------|--------------|
| Red         | yes    | +         | ratios, bars |
| Yellow      | no     | n/a       | bars         |
| Green       | yes    | -         | ratios, bars |
| Pink        | yes    | +         | p-, q-Values |
| Light Green | yes    | -         | p-, q-Values |

Dot Plots Dot Plots

Summary Table

SgFn vs Sg

SgPg vs Sg

SgPgFn vs Sg

SgPg vs SgFn

SgPgFn vs SgFn

SgPgFn vs SgPg

Coverage

SgPgFn vs SgFn

Raw

Normalized

Log<sub>2</sub> Ratios

| Protein  | SgPgFn vs SgFn         |                      |         |         | Raw    |         | Normalized |          | Description                                      | Log <sub>2</sub> Ratios |    |    |   |   |   |   |
|----------|------------------------|----------------------|---------|---------|--------|---------|------------|----------|--------------------------------------------------|-------------------------|----|----|---|---|---|---|
|          | Log <sub>2</sub> Ratio | Log <sub>2</sub> Sum | q-Value | p-Value | SgPgFn | SgFn    | SgPgFn     | SgFn     |                                                  | -6                      | -4 | -2 | 0 | 2 | 4 | 6 |
| SGO_1592 | -2.763                 | 9.962                | 0.0010  | 0.0014  | 58.500 | 379.500 | 70.6481    | 379.5000 | arcB; ornithine carbamoyltransferase             |                         |    |    |   |   |   |   |
|          |                        |                      |         |         | 41.500 | 455.000 | 57.1406    | 489.9347 |                                                  |                         |    |    |   |   |   |   |
| SGO_1593 | -2.148                 | 9.308                | 0.0002  | 0.0001  | 47.500 | 270.000 | 57.3639    | 270.0000 | arcA; arginine deiminase                         |                         |    |    |   |   |   |   |
|          |                        |                      |         |         | 43.000 | 229.500 | 59.2059    | 247.1209 |                                                  |                         |    |    |   |   |   |   |
| SGO_1599 | -1.777                 | 9.514                | 0.0004  | 0.0002  | 73.000 | 298.500 | 88.1592    | 298.5000 | sodA; manganese-dependent superoxide dismutase   |                         |    |    |   |   |   |   |
|          |                        |                      |         |         | 56.000 | 248.500 | 77.1054    | 267.5797 |                                                  |                         |    |    |   |   |   |   |
| SGO_1604 | -1.529                 | 3.806                | 0.0025  | 0.0063  |        | 6.000   |            | 6.0000   | acyltransferase family protein                   |                         |    |    |   |   |   |   |
|          |                        |                      |         |         | 1.500  | 5.500   | 2.0653     | 5.9223   |                                                  |                         |    |    |   |   |   |   |
| SGO_1605 | 0.408                  | 2.373                | 0.0156  | 0.0719  |        | 1.500   |            | 1.5000   | P-type ATPase, metal cation transport            |                         |    |    |   |   |   |   |
|          |                        |                      |         |         | 1.500  | 1.500   | 2.0653     | 1.6152   |                                                  |                         |    |    |   |   |   |   |
| SGO_1609 | 1.265                  | 6.028                | 0.0008  | 0.0009  | 20.500 | 10.000  | 24.7570    | 10.0000  | ATP-dependent RNA helicase, DEAD/DEAH box family |                         |    |    |   |   |   |   |
|          |                        |                      |         |         | 15.500 | 8.500   | 21.3417    | 9.1526   |                                                  |                         |    |    |   |   |   |   |
| SGO_1617 | -0.349                 | 5.319                | 0.0224  | 0.1137  | 6.500  | 9.500   | 7.8498     | 9.5000   | prfC; peptide chain release factor 3             |                         |    |    |   |   |   |   |
|          |                        |                      |         |         | 7.000  | 12.000  | 9.6382     | 12.9214  |                                                  |                         |    |    |   |   |   |   |
| SGO_1619 | 1.145                  | 6.949                | 0.0009  | 0.0012  | 38.000 | 19.000  | 45.8911    | 19.0000  | cation-transporting ATPase, E1-E2 family         |                         |    |    |   |   |   |   |
|          |                        |                      |         |         | 28.500 | 18.000  | 39.2411    | 19.3820  |                                                  |                         |    |    |   |   |   |   |
| SGO_1621 | -1.424                 | 3.946                | 0.0167  | 0.0775  | 2.000  | 6.000   | 2.4153     | 6.0000   | HD domain protein                                |                         |    |    |   |   |   |   |
|          |                        |                      |         |         |        | 6.500   |            | 6.9991   |                                                  |                         |    |    |   |   |   |   |
| SGO_1622 | -1.203                 | 5.334                | 0.0019  | 0.0044  | 4.000  | 15.000  | 4.8306     | 15.0000  | Cof family protein                               |                         |    |    |   |   |   |   |
|          |                        |                      |         |         | 5.500  | 12.000  | 7.5729     | 12.9214  |                                                  |                         |    |    |   |   |   |   |
| SGO_1623 | -1.129                 | 4.870                | 0.0131  | 0.0586  | 4.500  | 12.500  | 5.4345     | 12.5000  | murM; MurM                                       |                         |    |    |   |   |   |   |
|          |                        |                      |         |         |        | 10.500  |            | 11.3062  |                                                  |                         |    |    |   |   |   |   |
| SGO_1624 | -0.738                 | 4.411                | 0.0501  | 0.3047  |        | 10.000  |            | 10.0000  | murN; MurN protein                               |                         |    |    |   |   |   |   |
|          |                        |                      |         |         | 3.500  | 6.000   | 4.8191     | 6.4607   |                                                  |                         |    |    |   |   |   |   |

- Show detected proteins only  
 Show all proteins

Proteins found:  
584

Filter by category:

ABC Transporter

Test

Cutoff

q-Value

.005

p-Value

|             | Signif | Direction | Applies To   |
|-------------|--------|-----------|--------------|
| Red         | yes    | +         | ratios, bars |
| Yellow      | no     | n/a       | bars         |
| Green       | yes    | -         | ratios, bars |
| Pink        | yes    | +         | p-, q-Values |
| Light Green | yes    | -         | p-, q-Values |

Dot Plots Dot Plots

Summary Table

SgFn vs Sg

SgPg vs Sg

SgPgFn vs Sg

SgPg vs SgFn

SgPgFn vs SgFn

SgPgFn vs SgPg

Coverage

SgPgFn vs SgFn

Raw

Normalized

Log<sub>2</sub> Ratios

| Protein  | SgPgFn vs SgFn         |                      |         |         | Raw    |        | Normalized |         | Description                                                           | Log <sub>2</sub> Ratios |    |    |   |   |   |   |
|----------|------------------------|----------------------|---------|---------|--------|--------|------------|---------|-----------------------------------------------------------------------|-------------------------|----|----|---|---|---|---|
|          | Log <sub>2</sub> Ratio | Log <sub>2</sub> Sum | q-Value | p-Value | SgPgFn | SgFn   | SgPgFn     | SgFn    |                                                                       | -6                      | -4 | -2 | 0 | 2 | 4 | 6 |
| SGO_1625 | -1.628                 | 6.398                | 0.0008  | 0.0009  | 10.500 | 30.000 | 12.6804    | 30.0000 | acetoin utilization putative/CBS domain protein                       |                         |    |    |   |   |   |   |
|          |                        |                      |         |         | 6.000  | 31.000 | 8.2613     | 33.3802 |                                                                       |                         |    |    |   |   |   |   |
| SGO_1626 | 1.299                  | 4.843                | 0.0101  | 0.0412  | 9.500  |        | 11.4728    |         | branched-chain amino acid ABC transporter, ATP-binding protein        |                         |    |    |   |   |   |   |
|          |                        |                      |         |         | 9.000  | 4.500  | 12.3919    | 4.8455  |                                                                       |                         |    |    |   |   |   |   |
| SGO_1630 | 1.649                  | 7.739                | 0.0001  | 0.0000  | 68.500 | 27.500 | 82.7247    | 27.5000 | branched-chain amino acid ABC transporter, amino acid-binding protein |                         |    |    |   |   |   |   |
|          |                        |                      |         |         | 57.500 | 22.500 | 79.1707    | 24.2275 |                                                                       |                         |    |    |   |   |   |   |
| SGO_1632 | -0.833                 | 7.137                | 0.0239  | 0.1245  | 12.500 | 36.500 | 15.0958    | 36.5000 | clpP; ATP-dependent Clp protease, proteolytic subunit ClpP            |                         |    |    |   |   |   |   |
|          |                        |                      |         |         | 28.000 | 47.000 | 38.5527    | 50.6086 |                                                                       |                         |    |    |   |   |   |   |
| SGO_1633 | -0.442                 | 7.533                | 0.0195  | 0.0946  | 38.500 | 60.000 | 46.4949    | 60.0000 | upp; uracil phosphoribosyltransferase                                 |                         |    |    |   |   |   |   |
|          |                        |                      |         |         | 23.500 | 43.000 | 32.3567    | 46.3015 |                                                                       |                         |    |    |   |   |   |   |
| SGO_1648 | 0.375                  | 8.178                | 0.0014  | 0.0026  | 70.500 | 62.000 | 85.1401    | 62.0000 | ppx1; inorganic pyrophosphatase, manganese-dependent                  |                         |    |    |   |   |   |   |
|          |                        |                      |         |         | 57.000 | 59.500 | 78.4823    | 64.0684 |                                                                       |                         |    |    |   |   |   |   |
| SGO_1649 | -1.910                 | 4.362                | 0.0027  | 0.0073  | 2.000  | 9.000  | 2.4153     | 9.0000  | act; pyruvate formate-lyase-activating enzyme                         |                         |    |    |   |   |   |   |
|          |                        |                      |         |         |        | 8.500  |            | 9.1526  |                                                                       |                         |    |    |   |   |   |   |
| SGO_1652 | 0.811                  | 5.633                | 0.0010  | 0.0012  | 13.000 | 10.000 | 15.6996    | 10.0000 | intracellular glycosyl hydrolase                                      |                         |    |    |   |   |   |   |
|          |                        |                      |         |         | 11.500 | 7.500  | 15.8341    | 8.0758  |                                                                       |                         |    |    |   |   |   |   |
| SGO_1653 | -0.288                 | 6.406                | 0.0813  | 0.5500  | 10.500 | 20.500 | 12.6804    | 20.5000 | trehalose PTS enzyme II                                               |                         |    |    |   |   |   |   |
|          |                        |                      |         |         | 19.500 | 23.000 | 26.8492    | 24.7659 |                                                                       |                         |    |    |   |   |   |   |
| SGO_1666 | -3.259                 | 6.176                | 0.0001  | 0.0000  | 3.500  | 33.000 | 4.2268     | 33.0000 | trkA; potassium uptake protein, Trk family                            |                         |    |    |   |   |   |   |
|          |                        |                      |         |         | 2.000  | 30.000 | 2.7538     | 32.3034 |                                                                       |                         |    |    |   |   |   |   |
| SGO_1669 | 0.166                  | 5.693                | 0.0746  | 0.4987  | 11.000 | 15.000 | 13.2843    | 15.0000 | ribosomal large subunit pseudouridine synthase B                      |                         |    |    |   |   |   |   |
|          |                        |                      |         |         | 10.000 | 9.000  | 13.7688    | 9.6910  |                                                                       |                         |    |    |   |   |   |   |
| SGO_1675 | -1.069                 | 5.244                | 0.0031  | 0.0088  | 4.000  | 11.500 | 4.8306     | 11.5000 | HAM1 protein-like protein                                             |                         |    |    |   |   |   |   |
|          |                        |                      |         |         | 5.500  | 13.000 | 7.5729     | 13.9981 |                                                                       |                         |    |    |   |   |   |   |

- Show detected proteins only  
 Show all proteins

Proteins found:  
584

Filter by category:

ABC Transporter

Test

Cutoff

q-Value

.005

p-Value

|             | Signif | Direction | Applies To                |
|-------------|--------|-----------|---------------------------|
| Red         | yes    | +         | ratios, bars              |
| Yellow      | no     | n/a       | bars                      |
| Green       | yes    | -         | ratios, bars              |
| Pink        | yes    | +         | p <sup>-</sup> , q-Values |
| Light Green | yes    | -         | p <sup>-</sup> , q-Values |

Dot Plots Dot Plots

Summary Table

SgFn vs Sg

SgPg vs Sg

SgPgFn vs Sg

SgPg vs SgFn

SgPgFn vs SgFn

SgPgFn vs SgPg

Coverage

SgPgFn vs SgFn

Raw

Normalized

Log<sub>2</sub> Ratios

| Protein  | SgPgFn vs SgFn         |                      |         |         | Raw    |         |         |          | Normalized |         |          |          | Description | Log <sub>2</sub> Ratios |    |    |   |   |   |   |
|----------|------------------------|----------------------|---------|---------|--------|---------|---------|----------|------------|---------|----------|----------|-------------|-------------------------|----|----|---|---|---|---|
|          | Log <sub>2</sub> Ratio | Log <sub>2</sub> Sum | q-Value | p-Value | SgPgFn | SgFn    | SgPgFn  | SgFn     | SgPgFn     | SgFn    | SgPgFn   | SgFn     |             | -6                      | -4 | -2 | 0 | 2 | 4 | 6 |
| SGO_1676 | 0.048                  | 4.668                | 0.0972  | 0.6784  | 4.500  | 6.500   | 5.4345  | 6.5000   | 5.500      | 5.500   | 7.5729   | 5.9223   |             |                         |    |    |   |   |   |   |
|          |                        |                      |         |         |        |         |         |          |            |         |          |          |             |                         |    |    |   |   |   |   |
| SGO_1678 | -1.774                 | 4.577                | 0.0233  | 0.1208  | 2.500  | 9.000   | 3.0192  | 9.0000   |            | 11.000  |          | 11.8446  |             |                         |    |    |   |   |   |   |
|          |                        |                      |         |         |        |         |         |          |            |         |          |          |             |                         |    |    |   |   |   |   |
| SGO_1679 | 0.929                  | 8.341                | 0.0012  | 0.0019  | 82.000 | 60.000  | 99.0281 | 60.0000  | 82.500     | 48.000  | 113.5928 | 51.6854  |             |                         |    |    |   |   |   |   |
|          |                        |                      |         |         |        |         |         |          |            |         |          |          |             |                         |    |    |   |   |   |   |
| SGO_1681 | 0.855                  | 7.626                | 0.0043  | 0.0131  | 46.000 | 30.500  | 55.5524 | 30.5000  | 52.000     | 37.000  | 71.5979  | 39.8408  |             |                         |    |    |   |   |   |   |
|          |                        |                      |         |         |        |         |         |          |            |         |          |          |             |                         |    |    |   |   |   |   |
| SGO_1683 | 0.189                  | 7.196                | 0.0866  | 0.5936  | 34.500 | 44.500  | 41.6643 | 44.5000  | 25.500     | 23.500  | 35.1105  | 25.3043  |             |                         |    |    |   |   |   |   |
|          |                        |                      |         |         |        |         |         |          |            |         |          |          |             |                         |    |    |   |   |   |   |
| SGO_1685 | 1.918                  | 7.432                | 0.0017  | 0.0038  | 65.500 | 17.500  | 79.1018 | 17.5000  | 42.000     | 17.000  | 57.8291  | 18.3053  |             |                         |    |    |   |   |   |   |
|          |                        |                      |         |         |        |         |         |          |            |         |          |          |             |                         |    |    |   |   |   |   |
| SGO_1687 | 0.448                  | 6.848                | 0.0070  | 0.0253  | 28.000 | 28.000  | 33.8145 | 28.0000  | 23.500     | 19.500  | 32.3567  | 20.9972  |             |                         |    |    |   |   |   |   |
|          |                        |                      |         |         |        |         |         |          |            |         |          |          |             |                         |    |    |   |   |   |   |
| SGO_1688 | -1.487                 | 5.254                | 0.0006  | 0.0005  | 5.000  | 14.000  | 6.0383  | 14.0000  | 3.000      | 13.000  | 4.1306   | 13.9981  |             |                         |    |    |   |   |   |   |
|          |                        |                      |         |         |        |         |         |          |            |         |          |          |             |                         |    |    |   |   |   |   |
| SGO_1689 | -0.648                 | 7.080                | 0.0015  | 0.0031  | 22.500 | 38.500  | 27.1724 | 38.5000  | 18.500     | 41.000  | 25.4723  | 44.1480  |             |                         |    |    |   |   |   |   |
|          |                        |                      |         |         |        |         |         |          |            |         |          |          |             |                         |    |    |   |   |   |   |
| SGO_1690 | -0.770                 | 4.468                | 0.0601  | 0.3863  | 4.000  | 6.000   | 4.8306  | 6.0000   |            | 10.500  |          | 11.3062  |             |                         |    |    |   |   |   |   |
|          |                        |                      |         |         |        |         |         |          |            |         |          |          |             |                         |    |    |   |   |   |   |
| SGO_1691 | 0.867                  | 6.712                | 0.0097  | 0.0386  | 24.000 | 24.500  | 28.9838 | 24.5000  | 27.500     | 12.500  | 37.8643  | 13.4597  |             |                         |    |    |   |   |   |   |
|          |                        |                      |         |         |        |         |         |          |            |         |          |          |             |                         |    |    |   |   |   |   |
| SGO_1692 | -1.129                 | 9.280                | 0.0009  | 0.0011  | 78.000 | 197.500 | 94.1975 | 197.5000 | 73.000     | 213.000 | 100.5124 | 229.3540 |             |                         |    |    |   |   |   |   |
|          |                        |                      |         |         |        |         |         |          |            |         |          |          |             |                         |    |    |   |   |   |   |

 Show detected proteins only Show all proteinsProteins found:  
584 Filter by category:

ABC Transporter

Test

Cutoff

q-Value

.005

p-Value

|             | Signif | Direction | Applies To   |
|-------------|--------|-----------|--------------|
| Red         | yes    | +         | ratios, bars |
| Yellow      | no     | n/a       | bars         |
| Green       | yes    | -         | ratios, bars |
| Pink        | yes    | +         | p-, q-Values |
| Light Green | yes    | -         | p-, q-Values |

Dot Plots Dot Plots

Summary Table

SgFn vs Sg

SgPg vs Sg

SgPgFn vs Sg

SgPg vs SgFn

SgPgFn vs SgFn

SgPgFn vs SgPg

Coverage

SgPgFn vs SgFn

Raw

Normalized

Log<sub>2</sub> Ratios

| Protein  | SgPgFn vs SgFn         |                      |         |         | Raw     |         | Normalized |          | Description                                           | Log <sub>2</sub> Ratios |    |    |   |   |   |   |
|----------|------------------------|----------------------|---------|---------|---------|---------|------------|----------|-------------------------------------------------------|-------------------------|----|----|---|---|---|---|
|          | Log <sub>2</sub> Ratio | Log <sub>2</sub> Sum | q-Value | p-Value | SgPgFn  | SgFn    | SgPgFn     | SgFn     |                                                       | -6                      | -4 | -2 | 0 | 2 | 4 | 6 |
| SGO_1693 | -0.824                 | 6.332                | 0.0053  | 0.0180  | 15.500  | 25.000  | 18.7187    | 25.0000  | fabG; 3-oxoacyl-(acyl-carrier-protein) reductase      |                         |    |    |   |   |   |   |
|          |                        |                      |         |         | 8.000   | 24.000  | 11.0151    | 25.8427  |                                                       |                         |    |    |   |   |   |   |
| SGO_1694 | -0.122                 | 5.819                | 0.1009  | 0.7086  | 14.000  | 12.000  | 16.9072    | 12.0000  | fabD; malonyl CoA-acyl carrier protein transacylase   |                         |    |    |   |   |   |   |
|          |                        |                      |         |         | 7.500   | 16.000  | 10.3266    | 17.2285  |                                                       |                         |    |    |   |   |   |   |
| SGO_1695 | 0.295                  | 8.393                | 0.0233  | 0.1203  | 88.500  | 71.000  | 106.8779   | 71.0000  | enoyl-acyl carrier protein(ACP) reductase             |                         |    |    |   |   |   |   |
|          |                        |                      |         |         | 57.500  | 73.500  | 79.1707    | 79.1433  |                                                       |                         |    |    |   |   |   |   |
| SGO_1699 | -1.210                 | 4.762                | 0.0048  | 0.0154  |         | 11.000  |            | 11.0000  | transcriptional regulator, MarR family                |                         |    |    |   |   |   |   |
|          |                        |                      |         |         | 3.500   | 10.500  | 4.8191     | 11.3062  |                                                       |                         |    |    |   |   |   |   |
| SGO_1700 | -4.105                 | 7.012                | 0.0167  | 0.0776  | 3.000   | 55.500  | 3.6230     | 55.5000  | enoyl-CoA hydratase/isomerase family protein          |                         |    |    |   |   |   |   |
|          |                        |                      |         |         |         | 65.000  |            | 69.9907  |                                                       |                         |    |    |   |   |   |   |
| SGO_1701 | -0.419                 | 6.844                | 0.0121  | 0.0527  | 17.500  | 30.000  | 21.1341    | 30.0000  | aspartate kinase                                      |                         |    |    |   |   |   |   |
|          |                        |                      |         |         | 20.500  | 33.000  | 28.2261    | 35.5337  |                                                       |                         |    |    |   |   |   |   |
| SGO_1708 | 0.383                  | 7.250                | 0.0103  | 0.0432  | 32.500  | 36.500  | 39.2490    | 36.5000  | amiF; Oligopeptide transport ATP-binding protein amiF |                         |    |    |   |   |   |   |
|          |                        |                      |         |         | 34.000  | 27.500  | 46.8140    | 29.6114  |                                                       |                         |    |    |   |   |   |   |
| SGO_1709 | 1.303                  | 7.267                | 0.0024  | 0.0059  | 39.000  | 20.000  | 47.0988    | 20.0000  | amiE; Oligopeptide transport ATP-binding protein      |                         |    |    |   |   |   |   |
|          |                        |                      |         |         | 45.500  | 22.500  | 62.6481    | 24.2275  |                                                       |                         |    |    |   |   |   |   |
| SGO_1711 | 1.455                  | 6.248                | 0.0017  | 0.0038  | 20.000  | 10.500  | 24.1532    | 10.5000  | hppB; Oligopeptide transport system permease          |                         |    |    |   |   |   |   |
|          |                        |                      |         |         | 23.000  | 9.000   | 31.6683    | 9.6910   |                                                       |                         |    |    |   |   |   |   |
| SGO_1712 | 1.154                  | 9.163                | 0.0016  | 0.0033  | 167.000 | 111.000 | 201.6793   | 111.0000 | hppA; oligopeptide-binding lipoprotein                |                         |    |    |   |   |   |   |
|          |                        |                      |         |         | 138.500 | 65.000  | 190.6982   | 69.9907  |                                                       |                         |    |    |   |   |   |   |
| SGO_1713 | 0.072                  | 8.945                | 0.0937  | 0.6499  | 101.500 | 137.500 | 122.5775   | 137.5000 | hppG; oligopeptide-binding lipoprotein                |                         |    |    |   |   |   |   |
|          |                        |                      |         |         | 93.500  | 96.500  | 128.7385   | 103.9092 |                                                       |                         |    |    |   |   |   |   |
| SGO_1715 | -0.056                 | 7.577                | 0.0676  | 0.4455  | 36.500  | 51.000  | 44.0796    | 51.0000  | hppH; oligopeptide-binding lipoprotein                |                         |    |    |   |   |   |   |
|          |                        |                      |         |         | 36.000  | 43.000  | 49.5678    | 46.3015  |                                                       |                         |    |    |   |   |   |   |

- Show detected proteins only  
 Show all proteins

Proteins found:  
584

Filter by category:

ABC Transporter

Test

Cutoff

q-Value

.005

p-Value

|             | Signif | Direction | Applies To   |
|-------------|--------|-----------|--------------|
| Red         | yes    | +         | ratios, bars |
| Yellow      | no     | n/a       | bars         |
| Green       | yes    | -         | ratios, bars |
| Pink        | yes    | +         | p-, q-Values |
| Light Green | yes    | -         | p-, q-Values |

Dot Plots Dot Plots

Summary Table

SgFn vs Sg

SgPg vs Sg

SgPgFn vs Sg

SgPg vs SgFn

SgPgFn vs SgFn

SgPgFn vs SgPg

Coverage

SgPgFn vs SgFn

Raw

Normalized

Log<sub>2</sub> Ratios

| Protein  | SgPgFn vs SgFn         |                      |         |         | Raw     |         | Normalized |          | Description                                                     | Log <sub>2</sub> Ratios |    |    |   |   |   |   |
|----------|------------------------|----------------------|---------|---------|---------|---------|------------|----------|-----------------------------------------------------------------|-------------------------|----|----|---|---|---|---|
|          | Log <sub>2</sub> Ratio | Log <sub>2</sub> Sum | q-Value | p-Value | SgPgFn  | SgFn    | SgPgFn     | SgFn     |                                                                 | -6                      | -4 | -2 | 0 | 2 | 4 | 6 |
| SGO_1716 | 0.076                  | 8.001                | 0.0978  | 0.6839  | 70.500  | 70.000  | 85.1401    | 70.0000  | oligopeptide binding protein                                    |                         |    |    |   |   |   |   |
|          |                        |                      |         |         | 35.000  | 49.000  | 48.1909    | 52.7622  |                                                                 |                         |    |    |   |   |   |   |
| SGO_1718 | 0.280                  | 5.976                | 0.0608  | 0.3913  | 10.500  | 11.000  | 12.6804    | 11.0000  | sufB-1; FeS assembly protein SufB                               |                         |    |    |   |   |   |   |
|          |                        |                      |         |         | 16.000  | 16.000  | 22.0301    | 17.2285  |                                                                 |                         |    |    |   |   |   |   |
| SGO_1721 | 0.020                  | 6.386                | 0.1345  | 0.9787  | 17.000  | 24.000  | 20.5302    | 24.0000  | sufD; FeS assembly protein SufD                                 |                         |    |    |   |   |   |   |
|          |                        |                      |         |         | 15.500  | 16.500  | 21.3417    | 17.7669  |                                                                 |                         |    |    |   |   |   |   |
| SGO_1722 | -0.613                 | 5.854                | 0.0224  | 0.1139  | 6.500   | 18.000  | 7.8498     | 18.0000  | sufC; FeS assembly ATPase SufC                                  |                         |    |    |   |   |   |   |
|          |                        |                      |         |         | 11.500  | 15.000  | 15.8341    | 16.1517  |                                                                 |                         |    |    |   |   |   |   |
| SGO_1727 | 0.683                  | 5.661                | 0.0048  | 0.0156  | 12.000  | 11.500  | 14.4919    | 11.5000  | amino acid ABC transporter, amino acid-binding/permease protein |                         |    |    |   |   |   |   |
|          |                        |                      |         |         | 12.000  | 7.500   | 16.5226    | 8.0758   |                                                                 |                         |    |    |   |   |   |   |
| SGO_1728 | -0.263                 | 5.786                | 0.0020  | 0.0047  | 10.500  | 14.500  | 12.6804    | 14.5000  | glnQ; glutamine ABC transporter ATP-binding protein             |                         |    |    |   |   |   |   |
|          |                        |                      |         |         | 9.000   | 14.500  | 12.3919    | 15.6133  |                                                                 |                         |    |    |   |   |   |   |
| SGO_1729 | -3.517                 | 8.099                | 0.0025  | 0.0064  | 11.500  | 97.000  | 13.8881    | 97.0000  | hypothetical protein SGO_1729                                   |                         |    |    |   |   |   |   |
|          |                        |                      |         |         | 6.000   | 144.000 | 8.2613     | 155.0562 |                                                                 |                         |    |    |   |   |   |   |
| SGO_1730 | -1.314                 | 8.639                | 0.0024  | 0.0058  | 45.000  | 163.500 | 54.3447    | 163.5000 | SPFH domain/Band 7 family                                       |                         |    |    |   |   |   |   |
|          |                        |                      |         |         | 43.000  | 113.000 | 59.2059    | 121.6761 |                                                                 |                         |    |    |   |   |   |   |
| SGO_1731 | 1.960                  | 4.510                | 0.0006  | 0.0004  | 7.000   | 2.000   | 8.4536     | 2.0000   | DNA-binding response regulator                                  |                         |    |    |   |   |   |   |
|          |                        |                      |         |         | 7.000   | 2.500   | 9.6382     | 2.6919   |                                                                 |                         |    |    |   |   |   |   |
| SGO_1735 | -0.100                 | 8.136                | 0.0649  | 0.4266  | 59.000  | 82.500  | 71.2520    | 82.5000  | hypothetical protein SGO_1735                                   |                         |    |    |   |   |   |   |
|          |                        |                      |         |         | 46.500  | 59.000  | 64.0250    | 63.5300  |                                                                 |                         |    |    |   |   |   |   |
| SGO_1736 | -1.343                 | 4.908                | 0.0394  | 0.2279  | 4.000   | 15.500  | 4.8306     | 15.5000  | alkaline shock protein                                          |                         |    |    |   |   |   |   |
|          |                        |                      |         |         |         | 9.000   |            | 9.6910   |                                                                 |                         |    |    |   |   |   |   |
| SGO_1745 | 1.201                  | 11.373               | 0.0022  | 0.0053  | 665.500 | 422.000 | 803.6980   | 422.0000 | fba; fructose-1,6-bisphosphate aldolase, class II               |                         |    |    |   |   |   |   |
|          |                        |                      |         |         | 762.000 | 351.000 | 1049.1843  | 377.9496 |                                                                 |                         |    |    |   |   |   |   |

- Show detected proteins only  
 Show all proteins

Proteins found:  
584

Filter by category:

ABC Transporter

Test

Cutoff

q-Value

.005

p-Value

|             | Signif | Direction | Applies To   |
|-------------|--------|-----------|--------------|
| Red         | yes    | +         | ratios, bars |
| Yellow      | no     | n/a       | bars         |
| Green       | yes    | -         | ratios, bars |
| Pink        | yes    | +         | p-, q-Values |
| Light Green | yes    | -         | p-, q-Values |

Dot Plots Dot Plots



Summary Table

SgFn vs Sg

SgPg vs Sg

SgPgFn vs Sg

SgPg vs SgFn

SgPgFn vs SgFn

SgPgFn vs SgPg

Coverage

SgPgFn vs SgFn

Raw

Normalized

Log<sub>2</sub> Ratios

| Protein  | SgPgFn vs SgFn         |                      |         |         | Raw    |         | Normalized |          | Description                                                   | Log <sub>2</sub> Ratios |    |    |   |   |
|----------|------------------------|----------------------|---------|---------|--------|---------|------------|----------|---------------------------------------------------------------|-------------------------|----|----|---|---|
|          | Log <sub>2</sub> Ratio | Log <sub>2</sub> Sum | q-Value | p-Value | SgPgFn | SgFn    | SgPgFn     | SgFn     |                                                               | -6                      | -4 | -2 | 0 | 2 |
| SGO_1747 | -0.419                 | 3.082                |         |         | 3.000  |         | 3.6230     |          | hypothetical protein SGO_1747                                 |                         |    |    |   |   |
|          |                        |                      |         |         |        | 4.500   |            | 4.8455   |                                                               |                         |    |    |   |   |
| SGO_1748 | 0.649                  | 3.985                | 0.0510  | 0.3132  | 6.000  |         | 7.2460     |          | pyrG; CTP synthase                                            |                         |    |    |   |   |
|          |                        |                      |         |         | 3.500  | 3.500   | 4.8191     | 3.7687   |                                                               |                         |    |    |   |   |
| SGO_1749 | -0.950                 | 5.665                | 0.0052  | 0.0173  | 8.000  | 19.500  | 9.6613     | 19.5000  | manA; mannose-6-phosphate isomerase, class I                  |                         |    |    |   |   |
|          |                        |                      |         |         | 5.500  | 13.000  | 7.5729     | 13.9981  |                                                               |                         |    |    |   |   |
| SGO_1755 | 1.260                  | 5.573                | 0.0006  | 0.0006  | 13.000 | 7.000   | 15.6996    | 7.0000   | scrK; fructokinase                                            |                         |    |    |   |   |
|          |                        |                      |         |         | 13.000 | 6.500   | 17.8995    | 6.9991   |                                                               |                         |    |    |   |   |
| SGO_1757 | 0.309                  | 7.076                | 0.0451  | 0.2675  | 28.000 | 38.000  | 33.8145    | 38.0000  | glmS; glucosamine--fructose-6-phosphate aminotransferase      |                         |    |    |   |   |
|          |                        |                      |         |         | 29.000 | 21.500  | 39.9296    | 23.1508  |                                                               |                         |    |    |   |   |
| SGO_1763 | 0.682                  | 6.589                | 0.0020  | 0.0048  | 25.000 | 21.000  | 30.1915    | 21.0000  | ABC transporter, substrate-binding protein SP0092             |                         |    |    |   |   |
|          |                        |                      |         |         | 21.000 | 15.000  | 28.9145    | 16.1517  |                                                               |                         |    |    |   |   |
| SGO_1774 | -1.227                 | 5.684                | 0.0015  | 0.0028  | 5.000  | 18.500  | 6.0383     | 18.5000  | alcohol dehydrogenase, zinc-containing                        |                         |    |    |   |   |
|          |                        |                      |         |         | 7.000  | 16.000  | 9.6382     | 17.2285  |                                                               |                         |    |    |   |   |
| SGO_1784 | 0.459                  | 7.530                | 0.0023  | 0.0057  | 44.000 | 42.500  | 53.1371    | 42.5000  | leuS; leucyl-tRNA synthetase                                  |                         |    |    |   |   |
|          |                        |                      |         |         | 39.000 | 33.000  | 53.6984    | 35.5337  |                                                               |                         |    |    |   |   |
| SGO_1799 | -1.307                 | 8.362                | 0.0004  | 0.0002  | 44.000 | 117.500 | 53.1371    | 117.5000 | endopeptidase O                                               |                         |    |    |   |   |
|          |                        |                      |         |         | 30.500 | 108.000 | 41.9949    | 116.2922 |                                                               |                         |    |    |   |   |
| SGO_1802 | 2.760                  | 6.705                | 0.0014  | 0.0025  | 43.000 | 9.000   | 51.9294    | 9.0000   | Metal ABC transporter substrate-binding lipoprotein precursor |                         |    |    |   |   |
|          |                        |                      |         |         | 28.000 | 4.500   | 38.5527    | 4.8455   |                                                               |                         |    |    |   |   |
| SGO_1803 | 0.366                  | 6.034                | 0.0255  | 0.1343  | 12.500 | 15.500  | 15.0958    | 15.5000  | tpx; thioredoxin peroxidase                                   |                         |    |    |   |   |
|          |                        |                      |         |         | 16.000 | 12.000  | 22.0301    | 12.9214  |                                                               |                         |    |    |   |   |
| SGO_1805 | 2.406                  | 4.208                | 0.0435  | 0.2567  | 9.500  | 1.500   | 11.4728    | 1.5000   | hutU; urocanate hydratase                                     |                         |    |    |   |   |
|          |                        |                      |         |         | 4.000  |         | 5.5075     |          |                                                               |                         |    |    |   |   |

- Show detected proteins only  
 Show all proteins

Proteins found:  
584

Filter by category:

ABC Transporter

Test

Cutoff

q-Value

.005

p-Value

|             | Signif | Direction | Applies To   |
|-------------|--------|-----------|--------------|
| Red         | yes    | +         | ratios, bars |
| Yellow      | no     | n/a       | bars         |
| Green       | yes    | -         | ratios, bars |
| Pink        | yes    | +         | p-, q-Values |
| Light Green | yes    | -         | p-, q-Values |

Dot Plots Dot Plots

Summary Table

SgFn vs Sg

SgPg vs Sg

SgPgFn vs Sg

SgPg vs SgFn

SgPgFn vs SgFn

SgPgFn vs SgPg

Coverage

SgPgFn vs SgFn

Raw

Normalized

Log<sub>2</sub> Ratios

| Protein  | SgPgFn vs SgFn         |                      |         |         | Raw    |         | Normalized |          | Description                                                 | Log <sub>2</sub> Ratios |    |    |   |   |   |   |
|----------|------------------------|----------------------|---------|---------|--------|---------|------------|----------|-------------------------------------------------------------|-------------------------|----|----|---|---|---|---|
|          | Log <sub>2</sub> Ratio | Log <sub>2</sub> Sum | q-Value | p-Value | SgPgFn | SgFn    | SgPgFn     | SgFn     |                                                             | -6                      | -4 | -2 | 0 | 2 | 4 | 6 |
| SGO_1808 | 0.110                  | 4.382                | 0.1057  | 0.7490  | 4.500  |         | 5.4345     |          | fhs-2; formate--tetrahydrofolate ligase                     |                         |    |    |   |   |   |   |
|          |                        |                      |         |         | 6.500  | 6.000   | 8.9497     | 6.4607   |                                                             |                         |    |    |   |   |   |   |
| SGO_1811 | -1.453                 | 3.363                |         |         |        |         |            |          | hutH; histidine ammonia-lyase                               |                         |    |    |   |   |   |   |
|          |                        |                      |         |         | 2.000  | 7.000   | 2.7538     | 7.5375   |                                                             |                         |    |    |   |   |   |   |
| SGO_1822 | -2.042                 | 5.490                | 0.0212  | 0.1059  | 4.000  | 17.500  | 4.8306     | 17.5000  | relA; GTP diphosphokinase                                   |                         |    |    |   |   |   |   |
|          |                        |                      |         |         |        | 21.000  |            | 22.6124  |                                                             |                         |    |    |   |   |   |   |
| SGO_1824 | -0.145                 | 4.892                | 0.0667  | 0.4389  | 6.500  | 6.500   | 7.8498     | 6.5000   | prmA; ribosomal protein L11 methyltransferase               |                         |    |    |   |   |   |   |
|          |                        |                      |         |         | 4.500  | 8.500   | 6.1960     | 9.1526   |                                                             |                         |    |    |   |   |   |   |
| SGO_1828 | -0.466                 | 3.724                | 0.0639  | 0.4192  |        | 6.000   |            | 6.0000   | ATPase, AAA family                                          |                         |    |    |   |   |   |   |
|          |                        |                      |         |         | 2.500  | 3.500   | 3.4422     | 3.7687   |                                                             |                         |    |    |   |   |   |   |
| SGO_1834 | -1.950                 | 7.992                | 0.0015  | 0.0030  | 22.500 | 116.000 | 27.1724    | 116.0000 | hypothetical protein SGO_1834                               |                         |    |    |   |   |   |   |
|          |                        |                      |         |         | 18.000 | 80.500  | 24.7839    | 86.6807  |                                                             |                         |    |    |   |   |   |   |
| SGO_1835 | -0.086                 | 4.206                |         |         |        | 9.500   |            | 9.5000   | hypothetical protein SGO_1835                               |                         |    |    |   |   |   |   |
|          |                        |                      |         |         | 6.500  |         | 8.9497     |          |                                                             |                         |    |    |   |   |   |   |
| SGO_1843 | -0.060                 | 7.319                | 0.0775  | 0.5213  | 29.500 | 41.500  | 35.6260    | 41.5000  | pepS; aminopeptidase PepS                                   |                         |    |    |   |   |   |   |
|          |                        |                      |         |         | 31.000 | 37.000  | 42.6834    | 39.8408  |                                                             |                         |    |    |   |   |   |   |
| SGO_1844 | -0.633                 | 4.302                | 0.0107  | 0.0454  | 2.500  | 6.500   | 3.0192     | 6.5000   | cbxX/cfqX family protein                                    |                         |    |    |   |   |   |   |
|          |                        |                      |         |         | 3.500  | 5.000   | 4.8191     | 5.3839   |                                                             |                         |    |    |   |   |   |   |
| SGO_1847 | -1.233                 | 4.620                | 0.0507  | 0.3100  |        | 7.000   |            | 7.0000   | polC; DNA polymerase III, alpha subunit, Gram-positive type |                         |    |    |   |   |   |   |
|          |                        |                      |         |         | 3.000  | 12.500  | 4.1306     | 13.4597  |                                                             |                         |    |    |   |   |   |   |
| SGO_1851 | 0.024                  | 7.987                | 0.1208  | 0.8624  | 55.500 | 69.500  | 67.0251    | 69.5000  | proS; prolyl-tRNA synthetase                                |                         |    |    |   |   |   |   |
|          |                        |                      |         |         | 44.000 | 52.500  | 60.5828    | 56.5309  |                                                             |                         |    |    |   |   |   |   |
| SGO_1854 | 0.638                  | 4.952                | 0.0188  | 0.0905  | 6.000  | 5.000   | 7.2460     | 5.0000   | uppS; undecaprenyl diphosphate synthase                     |                         |    |    |   |   |   |   |
|          |                        |                      |         |         | 8.500  | 6.500   | 11.7035    | 6.9991   |                                                             |                         |    |    |   |   |   |   |

- Show detected proteins only  
 Show all proteins

Proteins found:  
584

Filter by category:

ABC Transporter

Test

Cutoff

q-Value

.005

p-Value

|             | Signif | Direction | Applies To   |
|-------------|--------|-----------|--------------|
| Red         | yes    | +         | ratios, bars |
| Yellow      | no     | n/a       | bars         |
| Green       | yes    | -         | ratios, bars |
| Pink        | yes    | +         | p-, q-Values |
| Light Green | yes    | -         | p-, q-Values |

Dot Plots Dot Plots

Summary Table

SgFn vs Sg

SgPg vs Sg

SgPgFn vs Sg

SgPg vs SgFn

SgPgFn vs SgFn

SgPgFn vs SgPg

Coverage

SgPgFn vs SgFn

Raw

Normalized

Log<sub>2</sub> Ratios

| Protein  | SgPgFn vs SgFn         |                      |         |         | Raw    |         | Normalized |          | Description                                | Log <sub>2</sub> Ratios |    |    |   |   |
|----------|------------------------|----------------------|---------|---------|--------|---------|------------|----------|--------------------------------------------|-------------------------|----|----|---|---|
|          | Log <sub>2</sub> Ratio | Log <sub>2</sub> Sum | q-Value | p-Value | SgPgFn | SgFn    | SgPgFn     | SgFn     |                                            | -6                      | -4 | -2 | 0 | 2 |
| SGO_1856 | -3.449                 | 7.784                | 0.0046  | 0.0145  | 8.500  | 132.500 | 10.2651    | 132.5000 | ATP-dependent proteinase ATP-binding chain |                         |    |    |   |   |
|          |                        |                      |         |         | 5.500  | 65.000  | 7.5729     | 69.9907  |                                            |                         |    |    |   |   |
| SGO_1860 | -1.135                 | 7.389                | 0.0101  | 0.0407  | 19.500 | 74.500  | 23.5494    | 74.5000  | 5'-nucleotidase, lipoprotein e(P4) family  |                         |    |    |   |   |
|          |                        |                      |         |         | 20.000 | 39.000  | 27.5376    | 41.9944  |                                            |                         |    |    |   |   |
| SGO_1862 | -1.712                 | 7.273                | 0.0007  | 0.0007  | 14.500 | 54.500  | 17.5111    | 54.5000  | alkaline shock protein                     |                         |    |    |   |   |
|          |                        |                      |         |         | 13.500 | 59.500  | 18.5879    | 64.0684  |                                            |                         |    |    |   |   |
| SGO_1863 | 0.982                  | 7.147                | 0.0012  | 0.0019  | 40.000 | 27.500  | 48.3064    | 27.5000  | efp; Elongation factor P (EF-P)            |                         |    |    |   |   |
|          |                        |                      |         |         | 33.000 | 19.000  | 45.4371    | 20.4588  |                                            |                         |    |    |   |   |
| SGO_1864 | -1.411                 | 7.231                | 0.0014  | 0.0026  | 22.500 | 53.000  | 27.1724    | 53.0000  | X-Pro aminopeptidase                       |                         |    |    |   |   |
|          |                        |                      |         |         | 11.000 | 51.000  | 15.1457    | 54.9158  |                                            |                         |    |    |   |   |
| SGO_1865 | -1.295                 | 5.738                | 0.0008  | 0.0010  | 6.500  | 17.500  | 7.8498     | 17.5000  | uvrA; excinuclease ABC, A subunit          |                         |    |    |   |   |
|          |                        |                      |         |         | 5.500  | 19.000  | 7.5729     | 20.4588  |                                            |                         |    |    |   |   |
| SGO_1867 | 2.857                  | 5.997                | 0.0015  | 0.0030  | 27.000 | 3.000   | 32.6068    | 3.0000   | hypothetical protein SGO_1867              |                         |    |    |   |   |
|          |                        |                      |         |         | 17.000 | 4.500   | 23.4070    | 4.8455   |                                            |                         |    |    |   |   |
| SGO_1879 | 0.347                  | 6.937                | 0.0108  | 0.0460  | 27.500 | 23.500  | 33.2107    | 23.5000  | rpsR; ribosomal protein S18                |                         |    |    |   |   |
|          |                        |                      |         |         | 25.500 | 28.500  | 35.1105    | 30.6882  |                                            |                         |    |    |   |   |
| SGO_1880 | 0.803                  | 7.049                | 0.0001  | 0.0000  | 35.500 | 24.000  | 42.8719    | 24.0000  | ssb-1; single-strand binding protein       |                         |    |    |   |   |
|          |                        |                      |         |         | 30.000 | 22.500  | 41.3065    | 24.2275  |                                            |                         |    |    |   |   |
| SGO_1881 | 0.957                  | 8.379                | 0.0031  | 0.0087  | 95.500 | 44.500  | 115.3316   | 44.5000  | rpsF; ribosomal protein S6                 |                         |    |    |   |   |
|          |                        |                      |         |         | 74.500 | 65.500  | 102.5777   | 70.5291  |                                            |                         |    |    |   |   |
| SGO_1882 | -0.698                 | 4.773                | 0.0085  | 0.0331  | 4.000  | 10.000  | 4.8306     | 10.0000  | folE; GTP cyclohydrolase I                 |                         |    |    |   |   |
|          |                        |                      |         |         | 4.000  | 6.500   | 5.5075     | 6.9991   |                                            |                         |    |    |   |   |
| SGO_1885 | -2.954                 | 11.002               | 0.0000  | 0.0000  | 94.500 | 909.500 | 114.1239   | 909.5000 | groL; 60 kDa chaperonin/groEL protein      |                         |    |    |   |   |
|          |                        |                      |         |         | 87.500 | 842.500 | 120.4772   | 907.1867 |                                            |                         |    |    |   |   |

- Show detected proteins only  
 Show all proteins

Proteins found:  
584

Filter by category:

ABC Transporter

Test

Cutoff

q-Value

.005

p-Value

|             | Signif | Direction | Applies To   |
|-------------|--------|-----------|--------------|
| Red         | yes    | +         | ratios, bars |
| Yellow      | no     | n/a       | bars         |
| Green       | yes    | -         | ratios, bars |
| Pink        | yes    | +         | p-, q-Values |
| Light Green | yes    | -         | p-, q-Values |

Dot Plots Dot Plots

Summary Table

SgFn vs Sg

SgPg vs Sg

SgPgFn vs Sg

SgPg vs SgFn

SgPgFn vs SgFn

SgPgFn vs SgPg

Coverage

SgPgFn vs SgFn

Raw

Normalized

Log<sub>2</sub> Ratios

| Protein  | SgPgFn vs SgFn         |                      |         |         | Raw     |         |          |          | Normalized                                               |      |        |      | Description | Log <sub>2</sub> Ratios |    |    |   |   |   |   |
|----------|------------------------|----------------------|---------|---------|---------|---------|----------|----------|----------------------------------------------------------|------|--------|------|-------------|-------------------------|----|----|---|---|---|---|
|          | Log <sub>2</sub> Ratio | Log <sub>2</sub> Sum | q-Value | p-Value | SgPgFn  | SgFn    | SgPgFn   | SgFn     | SgPgFn                                                   | SgFn | SgPgFn | SgFn |             | -6                      | -4 | -2 | 0 | 2 | 4 | 6 |
| SGO_1886 | -2.507                 | 6.104                | 0.0097  | 0.0386  | 3.000   | 17.500  | 3.6230   | 17.5000  | groES; chaperonin, 10 kDa                                |      |        |      |             |                         |    |    |   |   |   |   |
|          |                        |                      |         |         | 4.500   | 38.500  | 6.1960   | 41.4560  |                                                          |      |        |      |             |                         |    |    |   |   |   |   |
| SGO_1892 | -3.155                 | 7.166                | 0.0025  | 0.0065  | 7.500   | 79.000  | 9.0575   | 79.0000  | PTS system, fructose(mannose)-specific IIB               |      |        |      |             |                         |    |    |   |   |   |   |
|          |                        |                      |         |         | 4.000   | 46.500  | 5.5075   | 50.0702  |                                                          |      |        |      |             |                         |    |    |   |   |   |   |
| SGO_1898 | -2.385                 | 8.189                | 0.0006  | 0.0006  | 20.500  | 111.500 | 24.7570  | 111.5000 | glutamyl aminopeptidase                                  |      |        |      |             |                         |    |    |   |   |   |   |
|          |                        |                      |         |         | 16.000  | 124.000 | 22.0301  | 133.5207 |                                                          |      |        |      |             |                         |    |    |   |   |   |   |
| SGO_1901 | 0.852                  | 5.322                | 0.0102  | 0.0424  | 10.000  | 10.000  | 12.0766  | 10.0000  | tRNA binding domain                                      |      |        |      |             |                         |    |    |   |   |   |   |
|          |                        |                      |         |         | 9.500   | 4.500   | 13.0804  | 4.8455   |                                                          |      |        |      |             |                         |    |    |   |   |   |   |
| SGO_1903 | -0.428                 | 7.280                | 0.0167  | 0.0781  | 24.000  | 51.000  | 28.9838  | 51.0000  | ATP-dependent Zn protease                                |      |        |      |             |                         |    |    |   |   |   |   |
|          |                        |                      |         |         | 27.000  | 35.500  | 37.1758  | 38.2257  |                                                          |      |        |      |             |                         |    |    |   |   |   |   |
| SGO_1914 | -0.677                 | 3.531                | 0.0094  | 0.0372  |         | 4.500   |          | 4.5000   | folP; dihydropteroate synthase                           |      |        |      |             |                         |    |    |   |   |   |   |
|          |                        |                      |         |         | 2.000   | 4.000   | 2.7538   | 4.3071   |                                                          |      |        |      |             |                         |    |    |   |   |   |   |
| SGO_1916 | 0.227                  | 7.371                | 0.0018  | 0.0041  | 38.000  | 37.500  | 45.8911  | 37.5000  | ackA; acetate kinase                                     |      |        |      |             |                         |    |    |   |   |   |   |
|          |                        |                      |         |         | 31.500  | 36.000  | 43.3718  | 38.7641  |                                                          |      |        |      |             |                         |    |    |   |   |   |   |
| SGO_1917 | 0.237                  | 4.345                | 0.0275  | 0.1467  | 4.500   | 4.000   | 5.4345   | 4.0000   | hypothetical protein SGO_1917                            |      |        |      |             |                         |    |    |   |   |   |   |
|          |                        |                      |         |         | 4.000   | 5.000   | 5.5075   | 5.3839   |                                                          |      |        |      |             |                         |    |    |   |   |   |   |
| SGO_1926 | 0.411                  | 9.385                | 0.0008  | 0.0009  | 153.500 | 146.500 | 185.3759 | 146.5000 | rpoC; DNA-directed RNA polymerase, beta chain            |      |        |      |             |                         |    |    |   |   |   |   |
|          |                        |                      |         |         | 142.500 | 130.500 | 196.2057 | 140.5197 |                                                          |      |        |      |             |                         |    |    |   |   |   |   |
| SGO_1927 | 0.722                  | 9.162                | 0.0101  | 0.0410  | 135.500 | 141.000 | 163.6380 | 141.0000 | rpoB; DNA-directed RNA polymerase, beta subunit          |      |        |      |             |                         |    |    |   |   |   |   |
|          |                        |                      |         |         | 136.500 | 74.500  | 187.9444 | 80.2201  |                                                          |      |        |      |             |                         |    |    |   |   |   |   |
| SGO_1929 | 0.446                  | 7.843                | 0.0035  | 0.0103  | 50.500  | 48.000  | 60.9868  | 48.0000  | tyrS; tyrosyl-tRNA synthetase                            |      |        |      |             |                         |    |    |   |   |   |   |
|          |                        |                      |         |         | 52.000  | 45.500  | 71.5979  | 48.9935  |                                                          |      |        |      |             |                         |    |    |   |   |   |   |
| SGO_1936 | 0.686                  | 5.528                | 0.0033  | 0.0095  | 10.500  | 9.000   | 12.6804  | 9.0000   | adcA; metal-binding (Mn) permease precursor, lipoprotein |      |        |      |             |                         |    |    |   |   |   |   |
|          |                        |                      |         |         | 11.500  | 8.000   | 15.8341  | 8.6142   |                                                          |      |        |      |             |                         |    |    |   |   |   |   |

- Show detected proteins only  
 Show all proteins

Proteins found:  
584

Filter by category:

ABC Transporter

Test

Cutoff

q-Value

.005

p-Value

|  | Signif | Direction | Applies To   |
|--|--------|-----------|--------------|
|  | yes    | +         | ratios, bars |
|  | no     | n/a       | bars         |
|  | yes    | -         | ratios, bars |
|  | yes    | +         | p-, q-Values |
|  | yes    | -         | p-, q-Values |

Dot Plots

Summary Table

SgFn vs Sg

SgPg vs Sg

SgPgFn vs Sg

SgPg vs SgFn

SgPgFn vs SgFn

SgPgFn vs SgPg

Coverage

| Protein  | SgPgFn vs SgFn         |                      |         |         | Raw     |        | Normalized |         | Description                                        | Log <sub>2</sub> Ratios |    |    |   |   |   |   |
|----------|------------------------|----------------------|---------|---------|---------|--------|------------|---------|----------------------------------------------------|-------------------------|----|----|---|---|---|---|
|          | Log <sub>2</sub> Ratio | Log <sub>2</sub> Sum | q-Value | p-Value | SgPgFn  | SgFn   | SgPgFn     | SgFn    |                                                    | -6                      | -4 | -2 | 0 | 2 | 4 | 6 |
| SGO_1958 | 2.689                  | 8.543                | 0.0006  | 0.0004  | 122.500 | 27.500 | 147.9384   | 27.5000 | rplQ; ribosomal protein L17                        |                         |    |    |   |   |   |   |
|          |                        |                      |         |         | 127.000 | 21.000 | 174.8641   | 22.6124 |                                                    |                         |    |    |   |   |   |   |
| SGO_1959 | 0.308                  | 8.205                | 0.0048  | 0.0153  | 66.000  | 61.000 | 79.7056    | 61.0000 | rpoA; DNA-directed RNA polymerase, alpha subunit   |                         |    |    |   |   |   |   |
|          |                        |                      |         |         | 60.500  | 66.000 | 83.3014    | 71.0674 |                                                    |                         |    |    |   |   |   |   |
| SGO_1960 | 0.789                  | 7.066                | 0.0045  | 0.0141  | 36.000  | 30.500 | 43.4758    | 30.5000 | rpsK; ribosomal protein S11                        |                         |    |    |   |   |   |   |
|          |                        |                      |         |         | 29.500  | 18.000 | 40.6180    | 19.3820 |                                                    |                         |    |    |   |   |   |   |
| SGO_1961 | 1.553                  | 7.536                | 0.0006  | 0.0004  | 54.500  | 27.000 | 65.8175    | 27.0000 | rpsM; ribosomal protein S13p/S18e                  |                         |    |    |   |   |   |   |
|          |                        |                      |         |         | 52.500  | 19.000 | 72.2863    | 20.4588 |                                                    |                         |    |    |   |   |   |   |
| SGO_1964 | 0.825                  | 7.728                | 0.0045  | 0.0139  | 52.500  | 47.500 | 63.4022    | 47.5000 | adk; Adenylate kinase (ATP-AMP transphosphorylase) |                         |    |    |   |   |   |   |
|          |                        |                      |         |         | 51.500  | 28.000 | 70.9094    | 30.1498 |                                                    |                         |    |    |   |   |   |   |
| SGO_1966 | 0.567                  | 8.065                | 0.0299  | 0.1641  | 57.500  | 75.000 | 69.4405    | 75.0000 | rplO; ribosomal protein L15                        |                         |    |    |   |   |   |   |
|          |                        |                      |         |         | 63.000  | 34.000 | 86.7436    | 36.6105 |                                                    |                         |    |    |   |   |   |   |
| SGO_1967 | 1.214                  | 6.873                | 0.0039  | 0.0118  | 29.500  | 13.000 | 35.6260    | 13.0000 | 50S ribosomal protein L30 -related protein         |                         |    |    |   |   |   |   |
|          |                        |                      |         |         | 33.000  | 21.500 | 45.4371    | 23.1508 |                                                    |                         |    |    |   |   |   |   |
| SGO_1968 | 0.822                  | 8.659                | 0.0017  | 0.0037  | 110.500 | 84.000 | 133.4465   | 84.0000 | rpsE; ribosomal protein S5                         |                         |    |    |   |   |   |   |
|          |                        |                      |         |         | 90.000  | 58.500 | 123.9194   | 62.9916 |                                                    |                         |    |    |   |   |   |   |
| SGO_1969 | 1.746                  | 8.939                | 0.0006  | 0.0005  | 156.500 | 71.000 | 188.9988   | 71.0000 | rplR; ribosomal protein L18                        |                         |    |    |   |   |   |   |
|          |                        |                      |         |         | 135.500 | 41.000 | 186.5676   | 44.1480 |                                                    |                         |    |    |   |   |   |   |
| SGO_1970 | 1.504                  | 8.491                | 0.0022  | 0.0051  | 126.500 | 52.000 | 152.7690   | 52.0000 | BL10; 50S ribosomal protein L6                     |                         |    |    |   |   |   |   |
|          |                        |                      |         |         | 82.500  | 38.500 | 113.5928   | 41.4560 |                                                    |                         |    |    |   |   |   |   |
| SGO_1971 | 2.151                  | 9.780                | 0.0014  | 0.0024  | 339.500 | 79.000 | 410.0007   | 79.0000 | rpsH; ribosomal protein S8                         |                         |    |    |   |   |   |   |
|          |                        |                      |         |         | 224.500 | 75.500 | 309.1101   | 81.2969 |                                                    |                         |    |    |   |   |   |   |
| SGO_1973 | 1.406                  | 8.721                | 0.0009  | 0.0011  | 137.500 | 60.500 | 166.0533   | 60.5000 | BL6; 50S ribosomal protein L5                      |                         |    |    |   |   |   |   |
|          |                        |                      |         |         | 102.000 | 51.000 | 140.4420   | 54.9158 |                                                    |                         |    |    |   |   |   |   |

- Show detected proteins only
- Show all proteins

Proteins found: 584

Filter by category:

ABC Transporter

Test

Cutoff

q-Value

.005

p-Value

|             | Signif | Direction | Applies To   |
|-------------|--------|-----------|--------------|
| Red         | yes    | +         | ratios, bars |
| Yellow      | no     | n/a       | bars         |
| Green       | yes    | -         | ratios, bars |
| Pink        | yes    | +         | p-, q-Values |
| Light Green | yes    | -         | p-, q-Values |

Dot Plots Dot Plots

Summary Table

SgFn vs Sg

SgPg vs Sg

SgPgFn vs Sg

SgPg vs SgFn

SgPgFn vs SgFn

SgPgFn vs SgPg

Coverage

SgPgFn vs SgFn

Raw

Normalized

Log<sub>2</sub> Ratios

| Protein  | SgPgFn vs SgFn         |                      |         |         | Raw     |         | Normalized |          | Description                          | Log <sub>2</sub> Ratios |    |    |   |   |   |   |
|----------|------------------------|----------------------|---------|---------|---------|---------|------------|----------|--------------------------------------|-------------------------|----|----|---|---|---|---|
|          | Log <sub>2</sub> Ratio | Log <sub>2</sub> Sum | q-Value | p-Value | SgPgFn  | SgFn    | SgPgFn     | SgFn     |                                      | -6                      | -4 | -2 | 0 | 2 | 4 | 6 |
| SGO_1974 | 1.717                  | 7.964                | 0.0011  | 0.0016  | 71.500  | 34.500  | 86.3477    | 34.5000  | rplX; ribosomal protein L24          |                         |    |    |   |   |   |   |
|          |                        |                      |         |         | 76.000  | 22.500  | 104.6431   | 24.2275  |                                      |                         |    |    |   |   |   |   |
| SGO_1975 | 1.428                  | 7.967                | 0.0013  | 0.0021  | 69.000  | 40.500  | 83.3286    | 40.5000  | rplN; ribosomal protein L14          |                         |    |    |   |   |   |   |
|          |                        |                      |         |         | 71.500  | 26.000  | 98.4471    | 27.9963  |                                      |                         |    |    |   |   |   |   |
| SGO_1976 | 1.596                  | 7.102                | 0.0038  | 0.0111  | 51.500  | 14.500  | 62.1945    | 14.5000  | BS16; 30S ribosomal protein          |                         |    |    |   |   |   |   |
|          |                        |                      |         |         | 30.000  | 18.000  | 41.3065    | 19.3820  |                                      |                         |    |    |   |   |   |   |
| SGO_1977 | 0.837                  | 5.125                | 0.0457  | 0.2725  | 9.000   | 7.500   | 10.8689    | 7.5000   | rpmC; ribosomal protein L29          |                         |    |    |   |   |   |   |
|          |                        |                      |         |         | 12.000  |         | 16.5226    |          |                                      |                         |    |    |   |   |   |   |
| SGO_1978 | 1.151                  | 7.242                | 0.0002  | 0.0001  | 42.500  | 25.000  | 51.3256    | 25.0000  | rplP; ribosomal protein L16          |                         |    |    |   |   |   |   |
|          |                        |                      |         |         | 38.500  | 20.500  | 53.0100    | 22.0740  |                                      |                         |    |    |   |   |   |   |
| SGO_1979 | 0.136                  | 8.699                | 0.0521  | 0.3237  | 82.500  | 88.500  | 99.6320    | 88.5000  | rpsC; ribosomal protein S3           |                         |    |    |   |   |   |   |
|          |                        |                      |         |         | 85.500  | 102.000 | 117.7234   | 109.8315 |                                      |                         |    |    |   |   |   |   |
| SGO_1980 | 1.464                  | 8.550                | 0.0005  | 0.0003  | 108.000 | 53.500  | 130.4273   | 53.5000  | rplV; ribosomal protein L22          |                         |    |    |   |   |   |   |
|          |                        |                      |         |         | 105.000 | 43.000  | 144.5726   | 46.3015  |                                      |                         |    |    |   |   |   |   |
| SGO_1981 | 0.314                  | 8.180                | 0.0049  | 0.0163  | 62.000  | 64.000  | 74.8749    | 64.0000  | rpsS; ribosomal protein S19          |                         |    |    |   |   |   |   |
|          |                        |                      |         |         | 62.500  | 60.500  | 86.0551    | 65.1452  |                                      |                         |    |    |   |   |   |   |
| SGO_1982 | 0.388                  | 8.167                | 0.0310  | 0.1712  | 61.000  | 78.500  | 73.6673    | 78.5000  | rplB; ribosomal protein L2           |                         |    |    |   |   |   |   |
|          |                        |                      |         |         | 63.500  | 44.500  | 87.4320    | 47.9167  |                                      |                         |    |    |   |   |   |   |
| SGO_1983 | 1.224                  | 7.256                | 0.0069  | 0.0248  | 38.000  | 14.500  | 45.8911    | 14.5000  | rplW; ribosomal protein L23          |                         |    |    |   |   |   |   |
|          |                        |                      |         |         | 42.500  | 31.500  | 58.5175    | 33.9186  |                                      |                         |    |    |   |   |   |   |
| SGO_1984 | 1.096                  | 9.013                | 0.0008  | 0.0008  | 136.000 | 81.500  | 164.2418   | 81.5000  | rplD; ribosomal protein L4/L1 family |                         |    |    |   |   |   |   |
|          |                        |                      |         |         | 136.500 | 77.000  | 187.9444   | 82.9120  |                                      |                         |    |    |   |   |   |   |
| SGO_1985 | 0.693                  | 9.127                | 0.0024  | 0.0061  | 139.000 | 123.000 | 167.8648   | 123.0000 | rplC; ribosomal protein L3           |                         |    |    |   |   |   |   |
|          |                        |                      |         |         | 128.000 | 85.500  | 176.2409   | 92.0646  |                                      |                         |    |    |   |   |   |   |

- Show detected proteins only  
 Show all proteins

Proteins found:  
584

Filter by category:

ABC Transporter

Test

Cutoff

q-Value

.005

p-Value

|             | Signif | Direction | Applies To   |
|-------------|--------|-----------|--------------|
| Red         | yes    | +         | ratios, bars |
| Yellow      | no     | n/a       | bars         |
| Green       | yes    | -         | ratios, bars |
| Pink        | yes    | +         | p-, q-Values |
| Light Green | yes    | -         | p-, q-Values |

Dot Plots Dot Plots

Summary Table

SgFn vs Sg

SgPg vs Sg

SgPgFn vs Sg

SgPg vs SgFn

SgPgFn vs SgFn

SgPgFn vs SgPg

Coverage

| Protein  | SgPgFn vs SgFn         |                      |         |         | Raw     |         | Normalized |          | Description                                                      | Log <sub>2</sub> Ratios |    |    |   |   |   |   |
|----------|------------------------|----------------------|---------|---------|---------|---------|------------|----------|------------------------------------------------------------------|-------------------------|----|----|---|---|---|---|
|          | Log <sub>2</sub> Ratio | Log <sub>2</sub> Sum | q-Value | p-Value | SgPgFn  | SgFn    | SgPgFn     | SgFn     |                                                                  | -6                      | -4 | -2 | 0 | 2 | 4 | 6 |
| SGO_1986 | 1.323                  | 6.986                | 0.0002  | 0.0001  | 38.500  | 19.000  | 46.4949    | 19.0000  | rpsJ; ribosomal protein S10                                      |                         |    |    |   |   |   |   |
|          |                        |                      |         |         | 32.000  | 16.000  | 44.0602    | 17.2285  |                                                                  |                         |    |    |   |   |   |   |
| SGO_1989 | 0.821                  | 8.880                | 0.0010  | 0.0013  | 117.500 | 89.500  | 141.9001   | 89.5000  | purA; adenylosuccinate synthetase                                |                         |    |    |   |   |   |   |
|          |                        |                      |         |         | 115.500 | 75.000  | 159.0299   | 80.7585  |                                                                  |                         |    |    |   |   |   |   |
| SGO_1990 | -2.509                 | 5.718                | 0.0181  | 0.0858  | 3.500   | 21.500  | 4.2268     | 21.5000  | glutamate--cysteine ligase, putative/amino acid ligase, putative |                         |    |    |   |   |   |   |
|          |                        |                      |         |         |         | 25.000  |            | 26.9195  |                                                                  |                         |    |    |   |   |   |   |
| SGO_1993 | 0.841                  | 5.299                | 0.0076  | 0.0285  | 8.500   | 7.500   | 10.2651    | 7.5000   | possible transcriptional regulator                               |                         |    |    |   |   |   |   |
|          |                        |                      |         |         | 11.000  | 6.000   | 15.1457    | 6.4607   |                                                                  |                         |    |    |   |   |   |   |
| SGO_1995 | -0.770                 | 4.468                | 0.0601  | 0.3863  | 4.000   | 6.000   | 4.8306     | 6.0000   | MutT/nudix family protein                                        |                         |    |    |   |   |   |   |
|          |                        |                      |         |         |         | 10.500  |            | 11.3062  |                                                                  |                         |    |    |   |   |   |   |
| SGO_1998 | -0.791                 | 5.739                | 0.0021  | 0.0049  | 9.500   | 17.000  | 11.4728    | 17.0000  | clpB; ATP-dependent Clp proteinase, ATP-binding chain            |                         |    |    |   |   |   |   |
|          |                        |                      |         |         | 6.000   | 15.500  | 8.2613     | 16.6901  |                                                                  |                         |    |    |   |   |   |   |
| SGO_2000 | 0.356                  | 10.040               | 0.0060  | 0.0208  | 260.000 | 247.500 | 313.9917   | 247.5000 | tsf; translation elongation factor Ts                            |                         |    |    |   |   |   |   |
|          |                        |                      |         |         | 201.000 | 199.000 | 276.7534   | 214.2791 |                                                                  |                         |    |    |   |   |   |   |
| SGO_2001 | 0.316                  | 9.794                | 0.0097  | 0.0386  | 191.000 | 180.000 | 230.6631   | 180.0000 | rpsB; ribosomal protein S2                                       |                         |    |    |   |   |   |   |
|          |                        |                      |         |         | 189.500 | 200.500 | 260.9192   | 215.8943 |                                                                  |                         |    |    |   |   |   |   |
| SGO_2005 | 1.753                  | 4.401                | 0.0290  | 0.1574  | 9.000   |         | 10.8689    |          | LPXTG cell wall surface protein                                  |                         |    |    |   |   |   |   |
|          |                        |                      |         |         | 5.500   | 2.500   | 7.5729     | 2.6919   |                                                                  |                         |    |    |   |   |   |   |
| SGO_2007 | -0.365                 | 6.308                | 0.0012  | 0.0019  | 15.000  | 22.500  | 18.1149    | 22.5000  | nusG; transcription termination/antitermination factor NusG      |                         |    |    |   |   |   |   |
|          |                        |                      |         |         | 12.000  | 20.500  | 16.5226    | 22.0740  |                                                                  |                         |    |    |   |   |   |   |
| SGO_2033 | -1.704                 | 6.817                | 0.0004  | 0.0002  | 10.000  | 41.000  | 12.0766    | 41.0000  | nrdD; ribonucleoside-triphosphate reductase                      |                         |    |    |   |   |   |   |
|          |                        |                      |         |         | 10.500  | 42.000  | 14.4573    | 45.2247  |                                                                  |                         |    |    |   |   |   |   |
| SGO_2042 | 1.805                  | 7.874                | 0.0017  | 0.0037  | 83.500  | 35.000  | 100.8396   | 35.0000  | Bacterial protein of unknown function (DUF965) superfamily       |                         |    |    |   |   |   |   |
|          |                        |                      |         |         | 58.000  | 17.500  | 79.8592    | 18.8436  |                                                                  |                         |    |    |   |   |   |   |

- Show detected proteins only
- Show all proteins

Proteins found: 584

Filter by category:

ABC Transporter

Test

Cutoff

q-Value

.005

p-Value

|             | Signif | Direction | Applies To   |
|-------------|--------|-----------|--------------|
| Red         | yes    | +         | ratios, bars |
| White       | no     | n/a       | bars         |
| Green       | yes    | -         | ratios, bars |
| Light Green | yes    | +         | p-, q-Values |
| Light Red   | yes    | -         | p-, q-Values |

Dot Plots Dot Plots

Summary Table

SgFn vs Sg

SgPg vs Sg

SgPgFn vs Sg

SgPg vs SgFn

SgPgFn vs SgFn

SgPgFn vs SgPg

Coverage

SgPgFn vs SgFn

Raw

Normalized

Log<sub>2</sub> Ratios

| Protein  | SgPgFn vs SgFn         |                      |         |         | Raw     |         | Normalized |          | Description                            | Log <sub>2</sub> Ratios |    |    |   |   |
|----------|------------------------|----------------------|---------|---------|---------|---------|------------|----------|----------------------------------------|-------------------------|----|----|---|---|
|          | Log <sub>2</sub> Ratio | Log <sub>2</sub> Sum | q-Value | p-Value | SgPgFn  | SgFn    | SgPgFn     | SgFn     |                                        | -6                      | -4 | -2 | 0 | 2 |
| SGO_2045 | 3.243                  | 9.321                | 0.0003  | 0.0001  | 254.000 | 32.000  | 306.7457   | 32.0000  | recA; recA protein                     |                         |    |    |   |   |
|          |                        |                      |         |         | 197.500 | 27.000  | 271.9343   | 29.0730  |                                        |                         |    |    |   |   |
| SGO_2046 | -1.090                 | 4.310                | 0.0010  | 0.0012  | 3.000   | 7.000   | 3.6230     | 7.0000   | cinA; competence induced protein       |                         |    |    |   |   |
|          |                        |                      |         |         | 2.000   | 6.000   | 2.7538     | 6.4607   |                                        |                         |    |    |   |   |
| SGO_2053 | -0.957                 | 4.735                | 0.0014  | 0.0024  | 3.500   | 9.500   | 4.2268     | 9.5000   | DNA mismatch repair protein hexB       |                         |    |    |   |   |
|          |                        |                      |         |         | 3.500   | 7.500   | 4.8191     | 8.0758   |                                        |                         |    |    |   |   |
| SGO_2056 | -1.765                 | 5.849                | 0.0027  | 0.0072  | 3.500   | 19.000  | 4.2268     | 19.0000  | mutS; DNA mismatch repair protein MutS |                         |    |    |   |   |
|          |                        |                      |         |         | 7.000   | 23.000  | 9.6382     | 24.7659  |                                        |                         |    |    |   |   |
| SGO_2058 | 0.054                  | 9.316                | 0.0612  | 0.3967  | 143.000 | 152.500 | 172.6954   | 152.5000 | argS; arginyl-tRNA synthetase          |                         |    |    |   |   |
|          |                        |                      |         |         | 110.500 | 148.500 | 152.1455   | 159.9018 |                                        |                         |    |    |   |   |
| SGO_2060 | -0.696                 | 6.704                | 0.0031  | 0.0087  | 17.500  | 29.000  | 21.1341    | 29.0000  | aspS-1; aspartyl-tRNA synthetase       |                         |    |    |   |   |
|          |                        |                      |         |         | 13.500  | 33.000  | 18.5879    | 35.5337  |                                        |                         |    |    |   |   |
| SGO_2062 | -0.386                 | 8.038                | 0.0077  | 0.0286  | 51.000  | 80.500  | 61.5907    | 80.5000  | hisS; histidyl-tRNA synthetase         |                         |    |    |   |   |
|          |                        |                      |         |         | 38.000  | 63.500  | 52.3215    | 68.3755  |                                        |                         |    |    |   |   |
| SGO_2064 | 0.188                  | 8.126                | 0.0073  | 0.0270  | 64.500  | 67.000  | 77.8941    | 67.0000  | ilvD; dihydroxy-acid dehydratase       |                         |    |    |   |   |
|          |                        |                      |         |         | 51.500  | 59.000  | 70.9094    | 63.5300  |                                        |                         |    |    |   |   |
| SGO_2066 | 1.390                  | 6.300                | 0.0278  | 0.1487  | 31.500  | 12.500  | 38.0413    | 12.5000  | rpmG; ribosomal protein L33            |                         |    |    |   |   |
|          |                        |                      |         |         | 20.500  |         | 28.2261    |          |                                        |                         |    |    |   |   |
| SGO_2070 | -0.208                 | 4.559                | 0.0776  | 0.5231  | 5.500   | 8.500   | 6.6421     | 8.5000   | hypothetical protein SGO_2070          |                         |    |    |   |   |
|          |                        |                      |         |         | 3.000   | 4.000   | 4.1306     | 4.3071   |                                        |                         |    |    |   |   |
| SGO_2085 | 0.619                  | 6.785                | 0.0006  | 0.0006  | 28.500  | 22.500  | 34.4183    | 22.5000  | purB; adenylosuccinate lyase           |                         |    |    |   |   |
|          |                        |                      |         |         | 23.500  | 19.500  | 32.3567    | 20.9972  |                                        |                         |    |    |   |   |
| SGO_2098 | 0.275                  | 10.262               | 0.0340  | 0.1914  | 319.500 | 313.000 | 385.8475   | 313.0000 | rpsD; ribosomal protein S4             |                         |    |    |   |   |
|          |                        |                      |         |         | 208.500 | 224.500 | 287.0800   | 241.7370 |                                        |                         |    |    |   |   |

- Show detected proteins only  
 Show all proteins

Proteins found:  
584

Filter by category:

ABC Transporter

Test

Cutoff

q-Value

.005

p-Value

|             | Signif | Direction | Applies To                |
|-------------|--------|-----------|---------------------------|
| Red         | yes    | +         | ratios, bars              |
| Yellow      | no     | n/a       | bars                      |
| Green       | yes    | -         | ratios, bars              |
| Pink        | yes    | +         | p <sup>-</sup> , q-Values |
| Light Green | yes    | -         | p <sup>-</sup> , q-Values |

Dot Plots Dot Plots



Summary Table

SgFn vs Sg

SgPg vs Sg

SgPgFn vs Sg

SgPg vs SgFn

SgPgFn vs SgFn

SgPgFn vs SgPg

Coverage

SgPgFn vs SgFn

Raw

Normalized

Log<sub>2</sub> Ratios

| Protein  | SgPgFn vs SgFn         |                      |         |         | Raw    |         |         |          | Normalized |         |         |          | Description                                 | Log <sub>2</sub> Ratios |    |    |   |   |   |   |
|----------|------------------------|----------------------|---------|---------|--------|---------|---------|----------|------------|---------|---------|----------|---------------------------------------------|-------------------------|----|----|---|---|---|---|
|          | Log <sub>2</sub> Ratio | Log <sub>2</sub> Sum | q-Value | p-Value | SgPgFn | SgFn    | SgPgFn  | SgFn     | SgPgFn     | SgFn    | SgPgFn  | SgFn     |                                             | -6                      | -4 | -2 | 0 | 2 | 4 | 6 |
| SGO_2100 | 3.572                  | 7.678                | 0.0001  | 0.0000  | 76.500 | 9.000   | 92.3860 | 9.0000   | 70.000     | 6.500   | 96.3818 | 6.9991   | ABC transporter substrate-binding protein   |                         |    |    |   |   |   |   |
|          |                        |                      |         |         |        |         |         |          |            |         |         |          |                                             |                         |    |    |   |   |   |   |
| SGO_2104 | 0.762                  | 7.600                | 0.0117  | 0.0501  | 59.000 | 44.500  | 71.2520 | 44.5000  | 36.500     | 26.000  | 50.2562 | 27.9963  | srtB; sortase B                             |                         |    |    |   |   |   |   |
|          |                        |                      |         |         |        |         |         |          |            |         |         |          |                                             |                         |    |    |   |   |   |   |
| SGO_2105 | -4.443                 | 9.332                | 0.0000  | 0.0000  | 11.500 | 303.000 | 13.8881 | 303.0000 | 10.500     | 291.000 | 14.4573 | 313.3428 | abpA; amylase-binding protein AbpA          |                         |    |    |   |   |   |   |
|          |                        |                      |         |         |        |         |         |          |            |         |         |          |                                             |                         |    |    |   |   |   |   |
| SGO_2106 | -0.501                 | 7.373                | 0.0085  | 0.0332  | 28.000 | 55.500  | 33.8145 | 55.5000  | 25.000     | 39.000  | 34.4221 | 41.9944  | ribose-phosphate diphosphokinase            |                         |    |    |   |   |   |   |
|          |                        |                      |         |         |        |         |         |          |            |         |         |          |                                             |                         |    |    |   |   |   |   |
| SGO_2133 | -0.292                 | 8.626                | 0.0149  | 0.0680  | 76.500 | 121.000 | 92.3860 | 121.0000 | 61.500     | 90.000  | 84.6783 | 96.9102  | Cell division protein ftsH-like protein     |                         |    |    |   |   |   |   |
|          |                        |                      |         |         |        |         |         |          |            |         |         |          |                                             |                         |    |    |   |   |   |   |
| SGO_2134 | -1.595                 | 7.444                | 0.0006  | 0.0004  | 21.500 | 63.500  | 25.9647 | 63.5000  | 13.000     | 62.000  | 17.8995 | 66.7603  | hpt; hypoxanthine phosphoribosyltransferase |                         |    |    |   |   |   |   |
|          |                        |                      |         |         |        |         |         |          |            |         |         |          |                                             |                         |    |    |   |   |   |   |
| SGO_2142 | 0.760                  | 6.995                | 0.0026  | 0.0067  | 30.000 | 22.000  | 36.2298 | 22.0000  | 32.000     | 23.500  | 44.0602 | 25.3043  | GTP-binding protein                         |                         |    |    |   |   |   |   |
|          |                        |                      |         |         |        |         |         |          |            |         |         |          |                                             |                         |    |    |   |   |   |   |
| SGO_2150 | -1.773                 | 6.029                | 0.0014  | 0.0025  | 8.000  | 27.500  | 9.6613  | 27.5000  | 4.000      | 21.000  | 5.5075  | 22.6124  | degP; serine protease                       |                         |    |    |   |   |   |   |
|          |                        |                      |         |         |        |         |         |          |            |         |         |          |                                             |                         |    |    |   |   |   |   |

- Show detected proteins only  
 Show all proteins

Proteins found:  
584

Filter by category:

ABC Transporter

Test

Cutoff

q-Value

.005

p-Value

|             | Signif | Direction | Applies To   |
|-------------|--------|-----------|--------------|
| Red         | yes    | +         | ratios, bars |
| Yellow      | no     | n/a       | bars         |
| Green       | yes    | -         | ratios, bars |
| Pink        | yes    | +         | p-, q-Values |
| Light Green | yes    | -         | p-, q-Values |

Dot Plots Dot Plots
