# Supplementary material for: Proteomics of Streptococcus gordonii within a model developing oral microbial community
Source: PubMed Central journal article supplement (PMC3534352; doi:10.1186/1471-2180-12-211), 2012-09-18
Supplement: 1471-2180-12-211-S7.pdf [file 1471-2180-12-211-S7.pdf]

Summary Table

SgFn vs Sg

SgPg vs Sg

SgPgFn vs Sg

SgPg vs SgFn

SgPgFn vs SgFn

SgPgFn vs SgPg

Coverage

SgPgFn vs SgPg

Raw

Normalized

Log<sub>2</sub> Ratios

| Protein  | SgPgFn vs SgPg         |                      |         |         | Raw     |         | Normalized |          | Description                                                        | Log <sub>2</sub> Ratios |    |    |   |   |   |   |
|----------|------------------------|----------------------|---------|---------|---------|---------|------------|----------|--------------------------------------------------------------------|-------------------------|----|----|---|---|---|---|
|          | Log <sub>2</sub> Ratio | Log <sub>2</sub> Sum | q-Value | p-Value | SgPgFn  | SgPg    | SgPgFn     | SgPg     |                                                                    | -6                      | -4 | -2 | 0 | 2 | 4 | 6 |
| SGO_0001 | -0.702                 | 5.838                | 0.0183  | 0.0240  | 5.000   | 19.000  | 9.2209     | 19.8503  | dnaA; chromosomal replication initiator protein DnaA               |                         |    |    |   |   |   |   |
|          |                        |                      |         |         | 6.000   | 15.500  | 12.6156    | 15.5000  |                                                                    |                         |    |    |   |   |   |   |
| SGO_0002 | -0.691                 | 6.614                | 0.0067  | 0.0043  | 9.000   | 30.000  | 16.5976    | 31.3426  | dnaN; DNA polymerase III, beta subunit                             |                         |    |    |   |   |   |   |
|          |                        |                      |         |         | 10.000  | 29.000  | 21.0259    | 29.0000  |                                                                    |                         |    |    |   |   |   |   |
| SGO_0004 | -0.038                 | 6.879                | 0.2009  | 0.7232  | 15.000  | 36.500  | 27.6627    | 38.1335  | putative lipoprotein                                               |                         |    |    |   |   |   |   |
|          |                        |                      |         |         | 14.000  | 22.500  | 29.4363    | 22.5000  |                                                                    |                         |    |    |   |   |   |   |
| SGO_0006 | -0.362                 | 7.354                | 0.0348  | 0.0653  | 22.500  | 46.000  | 41.4940    | 48.0586  | ABC transporter, ATP-binding protein                               |                         |    |    |   |   |   |   |
|          |                        |                      |         |         | 14.500  | 43.500  | 30.4876    | 43.5000  |                                                                    |                         |    |    |   |   |   |   |
| SGO_0007 | -0.368                 | 6.754                | 0.0012  | 0.0001  | 13.000  | 29.000  | 23.9743    | 30.2978  | trpS; tryptophanyl-tRNA synthetase                                 |                         |    |    |   |   |   |   |
|          |                        |                      |         |         | 11.000  | 30.500  | 23.1285    | 30.5000  |                                                                    |                         |    |    |   |   |   |   |
| SGO_0008 | -0.103                 | 9.703                | 0.0397  | 0.0811  | 105.500 | 214.000 | 194.5610   | 223.5770 | inosine-5'-monophosphate dehydrogenase                             |                         |    |    |   |   |   |   |
|          |                        |                      |         |         | 98.500  | 208.000 | 207.1055   | 208.0000 |                                                                    |                         |    |    |   |   |   |   |
| SGO_0011 | 0.238                  | 4.509                | 0.1464  | 0.4687  | 4.500   | 6.000   | 8.2988     | 6.2685   | proteinase, M16 family                                             |                         |    |    |   |   |   |   |
|          |                        |                      |         |         | 2.000   | 4.000   | 4.2052     | 4.0000   |                                                                    |                         |    |    |   |   |   |   |
| SGO_0015 | -0.482                 | 3.996                | 0.0283  | 0.0484  |         | 5.500   |            | 5.7461   | ABC transporter (ATP-binding protein)                              |                         |    |    |   |   |   |   |
|          |                        |                      |         |         | 2.000   | 6.000   | 4.2052     | 6.0000   |                                                                    |                         |    |    |   |   |   |   |
| SGO_0022 | -1.137                 | 5.357                | 0.0037  | 0.0010  | 3.000   | 13.000  | 5.5325     | 13.5818  | trmU; tRNA (5-methylaminomethyl-2-thiouridylate)-methyltransferase |                         |    |    |   |   |   |   |
|          |                        |                      |         |         | 3.500   | 14.500  | 7.3591     | 14.5000  |                                                                    |                         |    |    |   |   |   |   |
| SGO_0025 | 0.005                  | 5.892                | 0.2382  | 0.9134  | 5.500   | 17.500  | 10.1430    | 18.2832  | gidA; glucose inhibited division protein A                         |                         |    |    |   |   |   |   |
|          |                        |                      |         |         | 9.500   | 11.000  | 19.9746    | 11.0000  |                                                                    |                         |    |    |   |   |   |   |
| SGO_0026 | -0.039                 | 3.561                | 0.2247  | 0.8413  | 2.000   | 2.500   | 3.6884     | 2.6119   | DHH subfamily 1 protein                                            |                         |    |    |   |   |   |   |
|          |                        |                      |         |         |         | 5.500   |            | 5.5000   |                                                                    |                         |    |    |   |   |   |   |
| SGO_0027 | 0.144                  | 7.060                | 0.1271  | 0.3931  | 15.500  | 29.000  | 28.5848    | 30.2978  | rplI; ribosomal protein L9                                         |                         |    |    |   |   |   |   |
|          |                        |                      |         |         | 20.000  | 32.500  | 42.0519    | 32.5000  |                                                                    |                         |    |    |   |   |   |   |

 Show detected proteins only Show all proteinsProteins found:  
627 Filter by category:

ABC Transporter

Test

Cutoff

q-Value

.005

p-Value

|             | Signif | Direction | Applies To   |
|-------------|--------|-----------|--------------|
| Red         | yes    | +         | ratios, bars |
| Yellow      | no     | n/a       | bars         |
| Green       | yes    | -         | ratios, bars |
| Pink        | yes    | +         | p-, q-Values |
| Light Green | yes    | -         | p-, q-Values |

Dot Plots Dot Plots

Summary Table

SgFn vs Sg

SgPg vs Sg

SgPgFn vs Sg

SgPg vs SgFn

SgPgFn vs SgFn

SgPgFn vs SgPg

Coverage

SgPgFn vs SgPg

Raw

Normalized

Log<sub>2</sub> Ratios

| Protein  | SgPgFn vs SgPg         |                      |         |         | Raw      |          | Normalized |           | Description                                          | Log <sub>2</sub> Ratios |    |    |   |   |
|----------|------------------------|----------------------|---------|---------|----------|----------|------------|-----------|------------------------------------------------------|-------------------------|----|----|---|---|
|          | Log <sub>2</sub> Ratio | Log <sub>2</sub> Sum | q-Value | p-Value | SgPgFn   | SgPg     | SgPgFn     | SgPg      |                                                      | -6                      | -4 | -2 | 0 | 2 |
| SGO_0028 | -0.159                 | 4.394                | 0.1982  | 0.7084  |          | 5.000    |            | 5.2238    | dnaC; replicative DNA helicase                       |                         |    |    |   |   |
|          |                        |                      |         |         | 3.000    | 9.500    | 6.3078     | 9.5000    |                                                      |                         |    |    |   |   |
| SGO_0030 | -0.278                 | 6.784                | 0.0184  | 0.0244  | 14.500   | 30.000   | 26.7406    | 31.3426   | aspB; aspartate transaminase                         |                         |    |    |   |   |
|          |                        |                      |         |         | 11.000   | 29.000   | 23.1285    | 29.0000   |                                                      |                         |    |    |   |   |
| SGO_0032 | -0.269                 | 6.860                | 0.0188  | 0.0254  | 15.500   | 30.500   | 28.5848    | 31.8649   | plsX; fatty acid/phospholipid synthesis protein PlsX |                         |    |    |   |   |
|          |                        |                      |         |         | 11.500   | 31.500   | 24.1798    | 31.5000   |                                                      |                         |    |    |   |   |
| SGO_0033 | 0.409                  | 5.472                | 0.0935  | 0.2631  | 9.500    | 10.000   | 17.5197    | 10.4475   | acpP; acyl carrier protein                           |                         |    |    |   |   |
|          |                        |                      |         |         | 4.000    | 8.000    | 8.4104     | 8.0000    |                                                      |                         |    |    |   |   |
| SGO_0042 | -0.112                 | 5.007                | 0.1627  | 0.5485  | 5.500    | 11.500   | 10.1430    | 12.0147   | transcription regulator, GntR family                 |                         |    |    |   |   |
|          |                        |                      |         |         |          | 10.000   |            | 10.0000   |                                                      |                         |    |    |   |   |
| SGO_0054 | -0.915                 | 6.823                | 0.0031  | 0.0007  | 11.000   | 33.500   | 20.2860    | 34.9992   | dltA; D-alanine-activating enzyme                    |                         |    |    |   |   |
|          |                        |                      |         |         | 9.000    | 39.000   | 18.9233    | 39.0000   |                                                      |                         |    |    |   |   |
| SGO_0057 | -0.316                 | 6.092                | 0.0050  | 0.0020  | 8.500    | 18.500   | 15.6755    | 19.3279   | dltD protein                                         |                         |    |    |   |   |
|          |                        |                      |         |         | 7.000    | 18.500   | 14.7182    | 18.5000   |                                                      |                         |    |    |   |   |
| SGO_0059 | 0.895                  | 12.958               | 0.0058  | 0.0034  | 1304.000 | 1491.000 | 2404.8107  | 1557.7259 | pXO1; hypothetical protein SGO_0059                  |                         |    |    |   |   |
|          |                        |                      |         |         | 1313.500 | 1233.500 | 2761.7566  | 1233.5000 |                                                      |                         |    |    |   |   |
| SGO_0063 | 0.146                  | 6.304                | 0.1104  | 0.3266  | 11.000   | 15.500   | 20.2860    | 16.1937   | hypothetical protein SGO_0063                        |                         |    |    |   |   |
|          |                        |                      |         |         | 10.000   | 21.500   | 21.0259    | 21.5000   |                                                      |                         |    |    |   |   |
| SGO_0064 | -0.837                 | 7.241                | 0.0120  | 0.0121  | 15.000   | 40.000   | 27.6627    | 41.7901   | FtsK/SpoIIIE family protein                          |                         |    |    |   |   |
|          |                        |                      |         |         | 12.500   | 55.500   | 26.2824    | 55.5000   |                                                      |                         |    |    |   |   |
| SGO_0065 | -0.179                 | 7.043                | 0.0094  | 0.0077  | 17.000   | 34.500   | 31.3511    | 36.0440   | hypothetical protein SGO_0065                        |                         |    |    |   |   |
|          |                        |                      |         |         | 14.500   | 34.000   | 30.4876    | 34.0000   |                                                      |                         |    |    |   |   |
| SGO_0066 | 0.388                  | 5.198                | 0.0661  | 0.1647  | 4.500    | 6.500    | 8.2988     | 6.7909    | D-3-phosphoglycerate dehydrogenase, putative         |                         |    |    |   |   |
|          |                        |                      |         |         | 6.000    | 9.000    | 12.6156    | 9.0000    |                                                      |                         |    |    |   |   |

- Show detected proteins only  
 Show all proteins

Proteins found:  
627

Filter by category:

ABC Transporter

Test

Cutoff

q-Value

.005

p-Value

|             | Signif | Direction | Applies To   |
|-------------|--------|-----------|--------------|
| Red         | yes    | +         | ratios, bars |
| Yellow      | no     | n/a       | bars         |
| Green       | yes    | -         | ratios, bars |
| Pink        | yes    | +         | p-, q-Values |
| Light Green | yes    | -         | p-, q-Values |

Dot Plots Dot Plots

Summary Table

SgFn vs Sg

SgPg vs Sg

SgPgFn vs Sg

SgPg vs SgFn

SgPgFn vs SgFn

SgPgFn vs SgPg

Coverage

SgPgFn vs SgPg

Raw

Normalized

Log<sub>2</sub> Ratios

| Protein  | SgPgFn vs SgPg         |                      |         |         | Raw     |         | Normalized |          | Description                                    | Log <sub>2</sub> Ratios |    |    |   |   |
|----------|------------------------|----------------------|---------|---------|---------|---------|------------|----------|------------------------------------------------|-------------------------|----|----|---|---|
|          | Log <sub>2</sub> Ratio | Log <sub>2</sub> Sum | q-Value | p-Value | SgPgFn  | SgPg    | SgPgFn     | SgPg     |                                                | -6                      | -4 | -2 | 0 | 2 |
| SGO_0067 | -0.954                 | 6.452                | 0.0122  | 0.0126  | 7.500   | 32.000  | 13.8313    | 33.4321  | protein with prophage function domain          |                         |    |    |   |   |
|          |                        |                      |         |         | 7.500   | 24.500  | 15.7695    | 24.5000  |                                                |                         |    |    |   |   |
| SGO_0068 | -0.305                 | 5.719                | 0.0051  | 0.0023  | 6.500   | 13.500  | 11.9872    | 14.1042  | lipoprotein, putative                          |                         |    |    |   |   |
|          |                        |                      |         |         | 5.500   | 15.000  | 11.5643    | 15.0000  |                                                |                         |    |    |   |   |
| SGO_0069 | -0.305                 | 5.023                | 0.0396  | 0.0796  | 4.500   | 9.000   | 8.2988     | 9.4028   | hypothetical protein SGO_0069                  |                         |    |    |   |   |
|          |                        |                      |         |         | 3.000   | 8.500   | 6.3078     | 8.5000   |                                                |                         |    |    |   |   |
| SGO_0070 | 0.087                  | 6.244                | 0.1261  | 0.3884  | 11.500  | 16.500  | 21.2081    | 17.2384  | merozoite surface protein 1                    |                         |    |    |   |   |
|          |                        |                      |         |         | 8.500   | 19.500  | 17.8720    | 19.5000  |                                                |                         |    |    |   |   |
| SGO_0080 | 0.021                  | 6.581                | 0.2181  | 0.8060  | 13.000  | 24.500  | 23.9743    | 25.5964  | hypothetical protein SGO_0080                  |                         |    |    |   |   |
|          |                        |                      |         |         | 11.500  | 22.000  | 24.1798    | 22.0000  |                                                |                         |    |    |   |   |
| SGO_0099 | -0.310                 | 3.686                | 0.0956  | 0.2721  | 2.000   | 4.000   | 3.6884     | 4.1790   | pula-2; pullulanase, type I                    |                         |    |    |   |   |
|          |                        |                      |         |         |         | 5.000   |            | 5.0000   |                                                |                         |    |    |   |   |
| SGO_0104 | 0.165                  | 8.825                | 0.0450  | 0.0968  | 60.000  | 100.000 | 110.6508   | 104.4752 | Maltose/maltodextrin-binding protein precursor |                         |    |    |   |   |
|          |                        |                      |         |         | 61.500  | 109.000 | 129.3095   | 109.0000 |                                                |                         |    |    |   |   |
| SGO_0105 | -0.915                 | 5.676                | 0.0067  | 0.0043  | 4.000   | 16.500  | 7.3767     | 17.2384  | malQ; 4-alpha-glucanotransferase               |                         |    |    |   |   |
|          |                        |                      |         |         | 5.000   | 16.000  | 10.5130    | 16.0000  |                                                |                         |    |    |   |   |
| SGO_0106 | -0.046                 | 7.963                | 0.0238  | 0.0370  | 33.500  | 61.500  | 61.7800    | 64.2523  | glgP-2; maltodextrin phosphorylase             |                         |    |    |   |   |
|          |                        |                      |         |         | 29.000  | 62.500  | 60.9752    | 62.5000  |                                                |                         |    |    |   |   |
| SGO_0113 | -0.143                 | 11.620               | 0.0405  | 0.0836  | 416.500 | 838.500 | 768.1010   | 876.0249 | acdH; alcohol-acetaldehyde dehydrogenase       |                         |    |    |   |   |
|          |                        |                      |         |         | 345.500 | 777.000 | 726.4461   | 777.0000 |                                                |                         |    |    |   |   |
| SGO_0135 | -0.332                 | 6.712                | 0.0532  | 0.1238  | 10.500  | 25.500  | 19.3639    | 26.6412  | v-type sodium ATP synthase, subunit A          |                         |    |    |   |   |
|          |                        |                      |         |         | 13.000  | 31.500  | 27.3337    | 31.5000  |                                                |                         |    |    |   |   |
| SGO_0136 | -0.291                 | 6.942                | 0.0664  | 0.1660  | 12.500  | 29.500  | 23.0522    | 30.8202  | v-type sodium ATP synthase, chain B            |                         |    |    |   |   |
|          |                        |                      |         |         | 15.500  | 36.500  | 32.5902    | 36.5000  |                                                |                         |    |    |   |   |

- Show detected proteins only  
 Show all proteins

Proteins found:  
627

Filter by category:

ABC Transporter

Test

Cutoff

q-Value

.005

p-Value

|             | Signif | Direction | Applies To   |
|-------------|--------|-----------|--------------|
| Red         | yes    | +         | ratios, bars |
| Yellow      | no     | n/a       | bars         |
| Green       | yes    | -         | ratios, bars |
| Pink        | yes    | +         | p-, q-Values |
| Light Green | yes    | -         | p-, q-Values |

Dot Plots Dot Plots

Summary Table

SgFn vs Sg

SgPg vs Sg

SgPgFn vs Sg

SgPg vs SgFn

SgPgFn vs SgFn

SgPgFn vs SgPg

Coverage

SgPgFn vs SgPg

Raw

Normalized

Log<sub>2</sub> Ratios

| Protein  | SgPgFn vs SgPg         |                      |         |         | Raw     |         | Normalized |          | Description                                                                                         | Log <sub>2</sub> Ratios |    |    |   |   |   |   |
|----------|------------------------|----------------------|---------|---------|---------|---------|------------|----------|-----------------------------------------------------------------------------------------------------|-------------------------|----|----|---|---|---|---|
|          | Log <sub>2</sub> Ratio | Log <sub>2</sub> Sum | q-Value | p-Value | SgPgFn  | SgPg    | SgPgFn     | SgPg     |                                                                                                     | -6                      | -4 | -2 | 0 | 2 | 4 | 6 |
| SGO_0139 | -1.092                 | 6.748                | 0.0063  | 0.0038  | 11.500  | 36.000  | 21.2081    | 37.6111  | thrC; threonine synthase                                                                            |                         |    |    |   |   |   |   |
|          |                        |                      |         |         | 6.500   | 35.000  | 13.6669    | 35.0000  |                                                                                                     |                         |    |    |   |   |   |   |
| SGO_0145 | -0.282                 | 6.743                | 0.0224  | 0.0329  | 12.000  | 27.000  | 22.1302    | 28.2083  | polI; DNA polymerase I                                                                              |                         |    |    |   |   |   |   |
|          |                        |                      |         |         | 12.500  | 30.500  | 26.2824    | 30.5000  |                                                                                                     |                         |    |    |   |   |   |   |
| SGO_0146 | -0.416                 | 5.791                | 0.1828  | 0.6415  | 10.500  | 16.000  | 19.3639    | 16.7160  | CoA-binding domain protein                                                                          |                         |    |    |   |   |   |   |
|          |                        |                      |         |         | 3.000   | 13.000  | 6.3078     | 13.0000  |                                                                                                     |                         |    |    |   |   |   |   |
| SGO_0152 | -1.441                 | 5.438                | 0.0019  | 0.0003  | 3.500   | 14.500  | 6.4546     | 15.1489  | tgt; queuine tRNA-ribosyltransferase                                                                |                         |    |    |   |   |   |   |
|          |                        |                      |         |         | 2.500   | 16.500  | 5.2565     | 16.5000  |                                                                                                     |                         |    |    |   |   |   |   |
| SGO_0154 | 0.309                  | 10.324               | 0.0256  | 0.0417  | 193.000 | 307.000 | 355.9267   | 320.7390 | pgi; glucose-6-phosphate isomerase                                                                  |                         |    |    |   |   |   |   |
|          |                        |                      |         |         | 167.000 | 254.000 | 351.1331   | 254.0000 |                                                                                                     |                         |    |    |   |   |   |   |
| SGO_0156 | -0.369                 | 5.181                | 0.0319  | 0.0567  | 4.000   | 11.000  | 7.3767     | 11.4923  | hypothetical protein SGO_0156                                                                       |                         |    |    |   |   |   |   |
|          |                        |                      |         |         | 4.000   | 9.000   | 8.4104     | 9.0000   |                                                                                                     |                         |    |    |   |   |   |   |
| SGO_0158 | 0.454                  | 7.674                | 0.0376  | 0.0735  | 37.500  | 37.500  | 69.1567    | 39.1782  | 2,3,4,5-tetrahydropyridine-2-carboxylate N-succinyltransferase, putative                            |                         |    |    |   |   |   |   |
|          |                        |                      |         |         | 23.500  | 46.500  | 49.4109    | 46.5000  |                                                                                                     |                         |    |    |   |   |   |   |
| SGO_0163 | -0.737                 | 7.118                | 0.0007  | 0.0000  | 14.000  | 41.000  | 25.8185    | 42.8348  | galU; UTP-glucose-1-phosphate uridylyltransferase                                                   |                         |    |    |   |   |   |   |
|          |                        |                      |         |         | 12.500  | 44.000  | 26.2824    | 44.0000  |                                                                                                     |                         |    |    |   |   |   |   |
| SGO_0164 | -0.244                 | 6.572                | 0.0594  | 0.1433  | 11.000  | 28.000  | 20.2860    | 29.2531  | Glycerol-3-phosphate dehydrogenase [NAD(P)+] (NAD(P)H-dependent glycerol-3-phosphate dehydrogenase) |                         |    |    |   |   |   |   |
|          |                        |                      |         |         | 11.000  | 22.500  | 23.1285    | 22.5000  |                                                                                                     |                         |    |    |   |   |   |   |
| SGO_0169 | 0.144                  | 5.383                | 0.1609  | 0.5407  | 5.500   | 11.500  | 10.1430    | 12.0147  | dut; dUTP diphosphatase                                                                             |                         |    |    |   |   |   |   |
|          |                        |                      |         |         | 5.500   | 8.000   | 11.5643    | 8.0000   |                                                                                                     |                         |    |    |   |   |   |   |
| SGO_0171 | -1.163                 | 4.672                | 0.0664  | 0.1664  | 2.500   | 8.500   | 4.6104     | 8.8804   | radA; DNA repair protein RadA                                                                       |                         |    |    |   |   |   |   |
|          |                        |                      |         |         |         | 12.000  |            | 12.0000  |                                                                                                     |                         |    |    |   |   |   |   |
| SGO_0174 | -0.429                 | 8.419                | 0.0055  | 0.0029  | 37.000  | 94.500  | 68.2347    | 98.7291  | gltX; glutamyl-tRNA synthetase                                                                      |                         |    |    |   |   |   |   |
|          |                        |                      |         |         | 37.000  | 97.500  | 77.7960    | 97.5000  |                                                                                                     |                         |    |    |   |   |   |   |

- Show detected proteins only  
 Show all proteins

Proteins found:  
627

Filter by category:

ABC Transporter

Test

Cutoff

q-Value

.005

p-Value

|             | Signif | Direction | Applies To   |
|-------------|--------|-----------|--------------|
| Red         | yes    | +         | ratios, bars |
| Yellow      | no     | n/a       | bars         |
| Green       | yes    | -         | ratios, bars |
| Pink        | yes    | +         | p-, q-Values |
| Light Green | yes    | -         | p-, q-Values |

Dot Plots Dot Plots

Summary Table

SgFn vs Sg

SgPg vs Sg

SgPgFn vs Sg

SgPg vs SgFn

SgPgFn vs SgFn

SgPgFn vs SgPg

Coverage

SgPgFn vs SgPg

Raw

Normalized

Log<sub>2</sub> Ratios

| Protein  | SgPgFn vs SgPg         |                      |         |         | Raw      |          | Normalized |           | Description                                           | Log <sub>2</sub> Ratios |    |    |   |   |
|----------|------------------------|----------------------|---------|---------|----------|----------|------------|-----------|-------------------------------------------------------|-------------------------|----|----|---|---|
|          | Log <sub>2</sub> Ratio | Log <sub>2</sub> Sum | q-Value | p-Value | SgPgFn   | SgPg     | SgPgFn     | SgPg      |                                                       | -6                      | -4 | -2 | 0 | 2 |
| SGO_0180 | -0.991                 | 6.054                | 0.0521  | 0.1201  | 3.500    | 26.500   | 6.4546     | 27.6859   | jag; hypothetical protein SGO_0180                    |                         |    |    |   |   |
|          |                        |                      |         |         | 8.000    | 15.500   | 16.8207    | 15.5000   |                                                       |                         |    |    |   |   |
| SGO_0190 | 0.512                  | 3.791                | 0.2040  | 0.7382  |          | 2.000    |            | 2.0895    | hypothetical protein SGO_0190                         |                         |    |    |   |   |
|          |                        |                      |         |         | 2.500    | 6.500    | 5.2565     | 6.5000    |                                                       |                         |    |    |   |   |
| SGO_0197 | 0.637                  | 3.854                | 0.0520  | 0.1190  |          | 3.500    |            | 3.6566    | predicted ribosome small subunit-dependent GTPase A   |                         |    |    |   |   |
|          |                        |                      |         |         | 3.000    | 4.500    | 6.3078     | 4.5000    |                                                       |                         |    |    |   |   |
| SGO_0198 | -0.532                 | 6.794                | 0.0089  | 0.0068  | 11.000   | 32.000   | 20.2860    | 33.4321   | rpe; ribulose-phosphate 3-epimerase                   |                         |    |    |   |   |
|          |                        |                      |         |         | 12.000   | 32.000   | 25.2311    | 32.0000   |                                                       |                         |    |    |   |   |
| SGO_0200 | -0.591                 | 6.391                | 0.0165  | 0.0202  | 7.500    | 24.500   | 13.8313    | 25.5964   | competence-induced protein Ccs50                      |                         |    |    |   |   |
|          |                        |                      |         |         | 9.500    | 24.500   | 19.9746    | 24.5000   |                                                       |                         |    |    |   |   |
| SGO_0201 | -0.917                 | 6.416                | 0.0048  | 0.0017  | 7.000    | 26.000   | 12.9093    | 27.1636   | cmp-binding-factor 1                                  |                         |    |    |   |   |
|          |                        |                      |         |         | 8.000    | 28.500   | 16.8207    | 28.5000   |                                                       |                         |    |    |   |   |
| SGO_0204 | -0.158                 | 7.633                | 0.0830  | 0.2217  | 25.000   | 56.500   | 46.1045    | 59.0285   | rpsL; ribosomal protein S12                           |                         |    |    |   |   |
|          |                        |                      |         |         | 22.500   | 46.000   | 47.3084    | 46.0000   |                                                       |                         |    |    |   |   |
| SGO_0205 | 0.071                  | 9.299                | 0.2016  | 0.7269  | 75.000   | 124.000  | 138.3135   | 129.5493  | rpsG; ribosomal protein S7                            |                         |    |    |   |   |
|          |                        |                      |         |         | 87.500   | 178.000  | 183.9769   | 178.0000  |                                                       |                         |    |    |   |   |
| SGO_0206 | 0.140                  | 12.413               | 0.0590  | 0.1419  | 837.000  | 1277.000 | 1543.5786  | 1334.1488 | fusA; translation elongation factor G                 |                         |    |    |   |   |
|          |                        |                      |         |         | 627.500  | 1258.000 | 1319.3775  | 1258.0000 |                                                       |                         |    |    |   |   |
| SGO_0207 | 0.375                  | 12.579               | 0.0248  | 0.0399  | 830.000  | 1267.000 | 1530.6694  | 1323.7013 | gap; glyceraldehyde-3-phosphate dehydrogenase, type I |                         |    |    |   |   |
|          |                        |                      |         |         | 919.500  | 1330.000 | 1933.3348  | 1330.0000 |                                                       |                         |    |    |   |   |
| SGO_0209 | -0.484                 | 13.183               | 0.0050  | 0.0022  | 1021.000 | 2477.500 | 1882.9077  | 2588.3741 | pgk; phosphoglycerate kinase                          |                         |    |    |   |   |
|          |                        |                      |         |         | 948.000  | 2836.000 | 1993.2587  | 2836.0000 |                                                       |                         |    |    |   |   |
| SGO_0215 | -0.339                 | 7.921                | 0.0562  | 0.1327  | 34.500   | 70.000   | 63.6242    | 73.1327   | glnA; glutamine synthetase, type I                    |                         |    |    |   |   |
|          |                        |                      |         |         | 21.000   | 61.500   | 44.1545    | 61.5000   |                                                       |                         |    |    |   |   |

- Show detected proteins only  
 Show all proteins

Proteins found:  
627

Filter by category:

ABC Transporter

Test

Cutoff

q-Value

p-Value

.005

|             | Signif | Direction | Applies To   |
|-------------|--------|-----------|--------------|
| Red         | yes    | +         | ratios, bars |
| Yellow      | no     | n/a       | bars         |
| Green       | yes    | -         | ratios, bars |
| Pink        | yes    | +         | p-, q-Values |
| Light Green | yes    | -         | p-, q-Values |

Dot Plots Dot Plots

Summary Table

SgFn vs Sg

SgPg vs Sg

SgPgFn vs Sg

SgPg vs SgFn

SgPgFn vs SgFn

SgPgFn vs SgPg

Coverage

SgPgFn vs SgPg

Raw

Normalized

Log<sub>2</sub> Ratios

| Protein  | SgPgFn vs SgPg         |                      |         |         | Raw     |         | Normalized |          | Description                                         | Log <sub>2</sub> Ratios |    |    |   |   |
|----------|------------------------|----------------------|---------|---------|---------|---------|------------|----------|-----------------------------------------------------|-------------------------|----|----|---|---|
|          | Log <sub>2</sub> Ratio | Log <sub>2</sub> Sum | q-Value | p-Value | SgPgFn  | SgPg    | SgPgFn     | SgPg     |                                                     | -6                      | -4 | -2 | 0 | 2 |
| SGO_0219 | -0.389                 | 7.715                | 0.0050  | 0.0021  | 26.000  | 57.000  | 47.9487    | 59.5509  | metallo-beta-lactamase superfamily protein<br>1     |                         |    |    |   |   |
|          |                        |                      |         |         | 20.500  | 59.500  | 43.1032    | 59.5000  |                                                     |                         |    |    |   |   |
| SGO_0230 | 0.108                  | 5.720                | 0.1672  | 0.5724  | 5.000   | 12.500  | 9.2209     | 13.0594  | Protein of unknown function, DUF536 family          |                         |    |    |   |   |
|          |                        |                      |         |         | 9.000   | 11.500  | 18.9233    | 11.5000  |                                                     |                         |    |    |   |   |
| SGO_0232 | -0.102                 | 4.947                | 0.1775  | 0.6200  | 4.500   | 5.500   | 8.2988     | 5.7461   | conserved hypothetical protein TIGR00103            |                         |    |    |   |   |
|          |                        |                      |         |         | 3.000   | 10.500  | 6.3078     | 10.5000  |                                                     |                         |    |    |   |   |
| SGO_0234 | -0.522                 | 6.807                | 0.0178  | 0.0227  | 13.500  | 35.000  | 24.8964    | 36.5663  | pepX; X-Pro dipeptidyl-peptidase                    |                         |    |    |   |   |
|          |                        |                      |         |         | 10.000  | 29.500  | 21.0259    | 29.5000  |                                                     |                         |    |    |   |   |
| SGO_0237 | -1.119                 | 5.325                | 0.0099  | 0.0084  | 2.500   | 12.500  | 4.6104     | 13.0594  | ccpA; CcpA protein (proteinase)                     |                         |    |    |   |   |
|          |                        |                      |         |         | 4.000   | 14.000  | 8.4104     | 14.0000  |                                                     |                         |    |    |   |   |
| SGO_0243 | 0.965                  | 4.260                | 0.0166  | 0.0206  |         | 4.500   |            | 4.7014   | hydroxymethylglutaryl-CoA reductase,<br>degradative |                         |    |    |   |   |
|          |                        |                      |         |         | 4.500   | 5.000   | 9.4617     | 5.0000   |                                                     |                         |    |    |   |   |
| SGO_0244 | -0.203                 | 5.193                | 0.0935  | 0.2633  | 6.000   | 11.500  | 11.0651    | 12.0147  | hydroxymethylglutaryl-CoA synthase                  |                         |    |    |   |   |
|          |                        |                      |         |         |         | 13.500  |            | 13.5000  |                                                     |                         |    |    |   |   |
| SGO_0247 | 0.100                  | 9.898                | 0.0316  | 0.0559  | 137.000 | 213.500 | 252.6527   | 223.0546 | pfl; formate acetyltransferase                      |                         |    |    |   |   |
|          |                        |                      |         |         | 114.500 | 237.500 | 240.7470   | 237.5000 |                                                     |                         |    |    |   |   |
| SGO_0252 | 0.427                  | 3.562                | 0.1586  | 0.5274  | 2.500   | 4.500   | 4.6104     | 4.7014   | possible TetR-type transcriptional regulator        |                         |    |    |   |   |
|          |                        |                      |         |         |         | 2.500   |            | 2.5000   |                                                     |                         |    |    |   |   |
| SGO_0255 | -0.533                 | 5.836                | 0.0073  | 0.0051  | 7.000   | 16.000  | 12.9093    | 16.7160  | Signal peptidase I                                  |                         |    |    |   |   |
|          |                        |                      |         |         | 5.000   | 17.000  | 10.5130    | 17.0000  |                                                     |                         |    |    |   |   |
| SGO_0260 | -1.274                 | 6.073                | 0.0045  | 0.0014  | 4.500   | 21.500  | 8.2988     | 22.4622  | DNA mismatch binding protein MutS2                  |                         |    |    |   |   |
|          |                        |                      |         |         | 5.500   | 25.000  | 11.5643    | 25.0000  |                                                     |                         |    |    |   |   |
| SGO_0262 | -1.706                 | 6.302                | 0.0019  | 0.0003  | 5.500   | 30.500  | 10.1430    | 31.8649  | dipeptidase                                         |                         |    |    |   |   |
|          |                        |                      |         |         | 4.000   | 28.500  | 8.4104     | 28.5000  |                                                     |                         |    |    |   |   |

- Show detected proteins only  
 Show all proteins

Proteins found:  
627

Filter by category:

ABC Transporter

Test

Cutoff

q-Value

.005

p-Value

|             | Signif | Direction | Applies To   |
|-------------|--------|-----------|--------------|
| Red         | yes    | +         | ratios, bars |
| Yellow      | no     | n/a       | bars         |
| Green       | yes    | -         | ratios, bars |
| Pink        | yes    | +         | p-, q-Values |
| Light Green | yes    | -         | p-, q-Values |

Dot Plots Dot Plots

Summary Table

SgFn vs Sg

SgPg vs Sg

SgPgFn vs Sg

SgPg vs SgFn

SgPgFn vs SgFn

SgPgFn vs SgPg

Coverage

SgPgFn vs SgPg

Raw

Normalized

Log<sub>2</sub> Ratios

| Protein  | SgPgFn vs SgPg         |                      |         |         | Raw     |         | Normalized |          | Description                                                        | Log <sub>2</sub> Ratios |    |    |   |   |   |   |
|----------|------------------------|----------------------|---------|---------|---------|---------|------------|----------|--------------------------------------------------------------------|-------------------------|----|----|---|---|---|---|
|          | Log <sub>2</sub> Ratio | Log <sub>2</sub> Sum | q-Value | p-Value | SgPgFn  | SgPg    | SgPgFn     | SgPg     |                                                                    | -6                      | -4 | -2 | 0 | 2 | 4 | 6 |
| SGO_0263 | 0.690                  | 7.637                | 0.0306  | 0.0536  | 41.000  | 34.500  | 75.6114    | 36.0440  | trx-1; thioredoxin                                                 |                         |    |    |   |   |   |   |
|          |                        |                      |         |         | 23.000  | 39.000  | 48.3597    | 39.0000  |                                                                    |                         |    |    |   |   |   |   |
| SGO_0272 | 0.368                  | 5.959                | 0.0212  | 0.0303  | 10.500  | 13.000  | 19.3639    | 13.5818  | hypothetical protein SGO_0272                                      |                         |    |    |   |   |   |   |
|          |                        |                      |         |         | 7.500   | 13.500  | 15.7695    | 13.5000  |                                                                    |                         |    |    |   |   |   |   |
| SGO_0276 | 0.077                  | 8.931                | 0.1104  | 0.3263  | 62.500  | 114.000 | 115.2612   | 119.1018 | gdhA; glutamate dehydrogenase (NADP)                               |                         |    |    |   |   |   |   |
|          |                        |                      |         |         | 64.500  | 118.000 | 135.6173   | 118.0000 |                                                                    |                         |    |    |   |   |   |   |
| SGO_0290 | 0.001                  | 4.065                | 0.2458  | 0.9518  | 3.000   | 4.500   | 5.5325     | 4.7014   | copper -translocating P-type ATPase                                |                         |    |    |   |   |   |   |
|          |                        |                      |         |         |         | 6.500   |            | 6.5000   |                                                                    |                         |    |    |   |   |   |   |
| SGO_0291 | -0.884                 | 5.946                | 0.0057  | 0.0032  | 5.000   | 18.500  | 9.2209     | 19.3279  | copper-translocating P-type ATPase                                 |                         |    |    |   |   |   |   |
|          |                        |                      |         |         | 6.000   | 20.500  | 12.6156    | 20.5000  |                                                                    |                         |    |    |   |   |   |   |
| SGO_0292 | 0.159                  | 9.120                | 0.0391  | 0.0774  | 84.000  | 120.000 | 154.9111   | 125.3703 | spxB; pyruvate oxidase                                             |                         |    |    |   |   |   |   |
|          |                        |                      |         |         | 66.000  | 137.500 | 138.7712   | 137.5000 |                                                                    |                         |    |    |   |   |   |   |
| SGO_0312 | 0.258                  | 11.002               | 0.0042  | 0.0012  | 309.000 | 441.500 | 569.8516   | 461.2582 | xfp; D-xylulose 5-phosphate/D-fructose 6-phosphate phosphoketolase |                         |    |    |   |   |   |   |
|          |                        |                      |         |         | 260.000 | 472.500 | 546.6743   | 472.5000 |                                                                    |                         |    |    |   |   |   |   |
| SGO_0321 | -0.292                 | 6.267                | 0.0650  | 0.1584  | 8.000   | 18.000  | 14.7534    | 18.8055  | polypeptide deformylase                                            |                         |    |    |   |   |   |   |
|          |                        |                      |         |         | 9.500   | 23.500  | 19.9746    | 23.5000  |                                                                    |                         |    |    |   |   |   |   |
| SGO_0333 | 0.128                  | 7.930                | 0.1089  | 0.3178  | 30.000  | 55.000  | 55.3254    | 57.4614  | rpsO; ribosomal protein S15                                        |                         |    |    |   |   |   |   |
|          |                        |                      |         |         | 34.500  | 58.500  | 72.5395    | 58.5000  |                                                                    |                         |    |    |   |   |   |   |
| SGO_0342 | -0.280                 | 7.594                | 0.0330  | 0.0606  | 25.000  | 46.000  | 46.1045    | 48.0586  | pepF-2; oligoendopeptidase                                         |                         |    |    |   |   |   |   |
|          |                        |                      |         |         | 19.500  | 58.000  | 41.0006    | 58.0000  |                                                                    |                         |    |    |   |   |   |   |
| SGO_0344 | 0.030                  | 8.477                | 0.0735  | 0.1898  | 48.000  | 85.500  | 88.5206    | 89.3263  | pnpA; polyribonucleotide nucleotidyltransferase                    |                         |    |    |   |   |   |   |
|          |                        |                      |         |         | 43.500  | 87.000  | 91.4628    | 87.0000  |                                                                    |                         |    |    |   |   |   |   |
| SGO_0349 | 0.186                  | 6.196                | 0.0419  | 0.0871  | 11.500  | 16.500  | 21.2081    | 17.2384  | cysS; cysteinyl-tRNA synthetase                                    |                         |    |    |   |   |   |   |
|          |                        |                      |         |         | 8.500   | 17.000  | 17.8720    | 17.0000  |                                                                    |                         |    |    |   |   |   |   |

- Show detected proteins only  
 Show all proteins

Proteins found:  
627

Filter by category:

ABC Transporter

Test

Cutoff

q-Value

.005

p-Value

|             | Signif | Direction | Applies To   |
|-------------|--------|-----------|--------------|
| Red         | yes    | +         | ratios, bars |
| Yellow      | no     | n/a       | bars         |
| Green       | yes    | -         | ratios, bars |
| Pink        | yes    | +         | p-, q-Values |
| Light Green | yes    | -         | p-, q-Values |

Dot Plots Dot Plots

Summary Table

SgFn vs Sg

SgPg vs Sg

SgPgFn vs Sg

SgPg vs SgFn

SgPgFn vs SgFn

SgPgFn vs SgPg

Coverage

SgPgFn vs SgPg

Raw

Normalized

Log<sub>2</sub> Ratios

| Protein  | SgPgFn vs SgPg         |                      |         |         | Raw     |         | Normalized |          | Description                                   | Log <sub>2</sub> Ratios |    |    |   |   |   |
|----------|------------------------|----------------------|---------|---------|---------|---------|------------|----------|-----------------------------------------------|-------------------------|----|----|---|---|---|
|          | Log <sub>2</sub> Ratio | Log <sub>2</sub> Sum | q-Value | p-Value | SgPgFn  | SgPg    | SgPgFn     | SgPg     |                                               | -6                      | -4 | -2 | 0 | 2 | 4 |
| SGO_0352 | -0.043                 | 6.880                | 0.1733  | 0.6020  | 16.000  | 31.500  | 29.5069    | 32.9097  | ABC transporter, ATP-binding protein SP1580   |                         |    |    |   |   |   |
|          |                        |                      |         |         | 13.500  | 27.000  | 28.3850    | 27.0000  |                                               |                         |    |    |   |   |   |
| SGO_0357 | -0.137                 | 7.442                | 0.0627  | 0.1523  | 21.000  | 46.000  | 38.7278    | 48.0586  | degV; DegV family fatty acid binding protein  |                         |    |    |   |   |   |
|          |                        |                      |         |         | 21.000  | 43.000  | 44.1545    | 43.0000  |                                               |                         |    |    |   |   |   |
| SGO_0358 | 0.221                  | 9.027                | 0.0116  | 0.0115  | 73.000  | 117.500 | 134.6251   | 122.7584 | rpIM; ribosomal protein L13                   |                         |    |    |   |   |   |
|          |                        |                      |         |         | 69.500  | 118.000 | 146.1303   | 118.0000 |                                               |                         |    |    |   |   |   |
| SGO_0359 | 0.488                  | 7.813                | 0.0120  | 0.0122  | 32.500  | 43.000  | 59.9358    | 44.9244  | rpsI; ribosomal protein S9                    |                         |    |    |   |   |   |
|          |                        |                      |         |         | 34.000  | 48.500  | 71.4882    | 48.5000  |                                               |                         |    |    |   |   |   |
| SGO_0372 | -0.374                 | 5.811                | 0.0055  | 0.0029  | 7.000   | 15.000  | 12.9093    | 15.6713  | malate oxidoreductase                         |                         |    |    |   |   |   |
|          |                        |                      |         |         | 5.500   | 16.000  | 11.5643    | 16.0000  |                                               |                         |    |    |   |   |   |
| SGO_0374 | -0.954                 | 5.376                | 0.0145  | 0.0161  | 5.000   | 12.000  | 9.2209     | 12.5370  | Response regulator of the LytR/AlgR family    |                         |    |    |   |   |   |
|          |                        |                      |         |         | 2.500   | 14.500  | 5.2565     | 14.5000  |                                               |                         |    |    |   |   |   |
| SGO_0384 | 0.142                  | 5.090                | 0.1416  | 0.4514  | 4.500   | 6.500   | 8.2988     | 6.7909   | putative carboxylate-amine/thiol ligase       |                         |    |    |   |   |   |
|          |                        |                      |         |         | 4.500   | 9.500   | 9.4617     | 9.5000   |                                               |                         |    |    |   |   |   |
| SGO_0390 | -0.369                 | 7.920                | 0.0236  | 0.0363  | 27.000  | 72.000  | 49.7929    | 75.2222  | glycerol-3-phosphate dehydrogenase (NAD (P)+) |                         |    |    |   |   |   |
|          |                        |                      |         |         | 26.500  | 61.500  | 55.7187    | 61.5000  |                                               |                         |    |    |   |   |   |
| SGO_0392 | -0.604                 | 5.365                | 0.0830  | 0.2216  | 5.500   | 13.000  | 10.1430    | 13.5818  | phosphoglycerate mutase                       |                         |    |    |   |   |   |
|          |                        |                      |         |         |         | 17.500  |            | 17.5000  |                                               |                         |    |    |   |   |   |
| SGO_0398 | -0.054                 | 4.508                | 0.2021  | 0.7300  | 2.500   | 7.500   | 4.6104     | 7.8356   | ABC transporter ATP-binding protein           |                         |    |    |   |   |   |
|          |                        |                      |         |         | 3.000   | 4.000   | 6.3078     | 4.0000   |                                               |                         |    |    |   |   |   |
| SGO_0401 | 0.708                  | 6.598                | 0.0127  | 0.0135  | 17.000  | 14.500  | 31.3511    | 15.1489  | grpE; co-chaperone GrpE                       |                         |    |    |   |   |   |
|          |                        |                      |         |         | 13.500  | 22.000  | 28.3850    | 22.0000  |                                               |                         |    |    |   |   |   |
| SGO_0402 | 0.026                  | 10.853               | 0.1603  | 0.5363  | 245.000 | 424.500 | 451.8241   | 443.4974 | dnaK; DnaK chaperone protein                  |                         |    |    |   |   |   |
|          |                        |                      |         |         | 229.000 | 473.000 | 481.4939   | 473.0000 |                                               |                         |    |    |   |   |   |

- Show detected proteins only  
 Show all proteins

Proteins found:  
627

Filter by category:

ABC Transporter

Test

Cutoff

q-Value

.005

p-Value

|             | Signif | Direction | Applies To   |
|-------------|--------|-----------|--------------|
| Red         | yes    | +         | ratios, bars |
| Yellow      | no     | n/a       | bars         |
| Green       | yes    | -         | ratios, bars |
| Pink        | yes    | +         | p-, q-Values |
| Light Green | yes    | -         | p-, q-Values |

Dot Plots Dot Plots



Summary Table

SgFn vs Sg

SgPg vs Sg

SgPgFn vs Sg

SgPg vs SgFn

SgPgFn vs SgFn

SgPgFn vs SgPg

Coverage

SgPgFn vs SgPg

Raw

Normalized

Log<sub>2</sub> Ratios

| Protein  | SgPgFn vs SgPg         |                      |         |         | Raw     |         | Normalized |          | Description                                          | Log <sub>2</sub> Ratios |    |    |   |   |   |   |
|----------|------------------------|----------------------|---------|---------|---------|---------|------------|----------|------------------------------------------------------|-------------------------|----|----|---|---|---|---|
|          | Log <sub>2</sub> Ratio | Log <sub>2</sub> Sum | q-Value | p-Value | SgPgFn  | SgPg    | SgPgFn     | SgPg     |                                                      | -6                      | -4 | -2 | 0 | 2 | 4 | 6 |
| SGO_0404 | -0.415                 | 5.889                | 0.0769  | 0.2007  | 5.000   | 16.000  | 9.2209     | 16.7160  | dnaJ; DnaJ chaparone protein                         |                         |    |    |   |   |   |   |
|          |                        |                      |         |         | 8.000   | 16.500  | 16.8207    | 16.5000  |                                                      |                         |    |    |   |   |   |   |
| SGO_0411 | 0.118                  | 4.564                | 0.1587  | 0.5290  | 4.500   | 8.000   | 8.2988     | 8.3580   | conserved hypothetical protein TIGR01440             |                         |    |    |   |   |   |   |
|          |                        |                      |         |         |         | 7.000   |            | 7.0000   |                                                      |                         |    |    |   |   |   |   |
| SGO_0412 | 0.259                  | 11.086               | 0.0051  | 0.0025  | 328.500 | 463.000 | 605.8131   | 483.7204 | tig; trigger factor                                  |                         |    |    |   |   |   |   |
|          |                        |                      |         |         | 275.000 | 506.000 | 578.2132   | 506.0000 |                                                      |                         |    |    |   |   |   |   |
| SGO_0413 | -0.577                 | 6.900                | 0.0368  | 0.0718  | 12.500  | 27.000  | 23.0522    | 28.2083  | DNA-directed RNA polymerase delta chain              |                         |    |    |   |   |   |   |
|          |                        |                      |         |         | 11.500  | 44.000  | 24.1798    | 44.0000  |                                                      |                         |    |    |   |   |   |   |
| SGO_0415 | -0.140                 | 9.505                | 0.0226  | 0.0337  | 89.500  | 184.000 | 165.0541   | 192.2344 | secA; preprotein translocase, SecA subunit           |                         |    |    |   |   |   |   |
|          |                        |                      |         |         | 86.000  | 188.500 | 180.8230   | 188.5000 |                                                      |                         |    |    |   |   |   |   |
| SGO_0416 | -0.964                 | 6.657                | 0.0227  | 0.0340  | 12.000  | 37.000  | 22.1302    | 38.6558  | phospho-2-dehydro-3-deoxyheptonate aldolase          |                         |    |    |   |   |   |   |
|          |                        |                      |         |         | 6.000   | 27.500  | 12.6156    | 27.5000  |                                                      |                         |    |    |   |   |   |   |
| SGO_0426 | 0.105                  | 4.407                | 0.1979  | 0.7048  | 4.000   | 7.500   | 7.3767     | 7.8356   | Cof family protein                                   |                         |    |    |   |   |   |   |
|          |                        |                      |         |         |         | 6.000   |            | 6.0000   |                                                      |                         |    |    |   |   |   |   |
| SGO_0427 | 0.043                  | 6.199                | 0.1767  | 0.6150  | 10.500  | 16.000  | 19.3639    | 16.7160  | universal stress protein family                      |                         |    |    |   |   |   |   |
|          |                        |                      |         |         | 8.500   | 19.500  | 17.8720    | 19.5000  |                                                      |                         |    |    |   |   |   |   |
| SGO_0429 | -0.226                 | 8.510                | 0.0878  | 0.2406  | 43.500  | 112.500 | 80.2218    | 117.5346 | aspartate transaminase                               |                         |    |    |   |   |   |   |
|          |                        |                      |         |         | 41.000  | 80.500  | 86.2063    | 80.5000  |                                                      |                         |    |    |   |   |   |   |
| SGO_0432 | -0.301                 | 6.773                | 0.0214  | 0.0309  | 14.000  | 31.000  | 25.8185    | 32.3873  | entB; isochorismatase family protein                 |                         |    |    |   |   |   |   |
|          |                        |                      |         |         | 11.000  | 28.000  | 23.1285    | 28.0000  |                                                      |                         |    |    |   |   |   |   |
| SGO_0434 | -0.404                 | 6.589                | 0.0524  | 0.1213  | 13.500  | 23.000  | 24.8964    | 24.0293  | aspS-2; aspartyl-tRNA synthetase                     |                         |    |    |   |   |   |   |
|          |                        |                      |         |         | 8.000   | 30.500  | 16.8207    | 30.5000  |                                                      |                         |    |    |   |   |   |   |
| SGO_0435 | 0.065                  | 5.843                | 0.1504  | 0.4844  | 8.500   | 12.500  | 15.6755    | 13.0594  | gatC; glutamyl-tRNA(Gln) amidotransferase, C subunit |                         |    |    |   |   |   |   |
|          |                        |                      |         |         | 6.500   | 15.000  | 13.6669    | 15.0000  |                                                      |                         |    |    |   |   |   |   |

- Show detected proteins only  
 Show all proteins

Proteins found:  
627

Filter by category:

ABC Transporter

Test

Cutoff

q-Value

p-Value

.005

|             | Signif | Direction | Applies To   |
|-------------|--------|-----------|--------------|
| Red         | yes    | +         | ratios, bars |
| Yellow      | no     | n/a       | bars         |
| Green       | yes    | -         | ratios, bars |
| Pink        | yes    | +         | p-, q-Values |
| Light Green | yes    | -         | p-, q-Values |

Dot Plots Dot Plots

Summary Table

SgFn vs Sg

SgPg vs Sg

SgPgFn vs Sg

SgPg vs SgFn

SgPgFn vs SgFn

SgPgFn vs SgPg

Coverage

SgPgFn vs SgPg

Raw

Normalized

Log<sub>2</sub> Ratios

| Protein  | SgPgFn vs SgPg         |                      |         |         | Raw    |         | Normalized |          | Description                                          | Log <sub>2</sub> Ratios |    |    |   |   |   |   |
|----------|------------------------|----------------------|---------|---------|--------|---------|------------|----------|------------------------------------------------------|-------------------------|----|----|---|---|---|---|
|          | Log <sub>2</sub> Ratio | Log <sub>2</sub> Sum | q-Value | p-Value | SgPgFn | SgPg    | SgPgFn     | SgPg     |                                                      | -6                      | -4 | -2 | 0 | 2 | 4 | 6 |
| SGO_0436 | -0.090                 | 8.584                | 0.0541  | 0.1266  | 50.000 | 99.500  | 92.2090    | 103.9529 | gatA; glutamyl-tRNA(Gln) amidotransferase, A subunit |                         |    |    |   |   |   |   |
|          |                        |                      |         |         | 44.500 | 94.000  | 93.5654    | 94.0000  |                                                      |                         |    |    |   |   |   |   |
| SGO_0437 | -0.208                 | 8.655                | 0.1558  | 0.5048  | 65.000 | 95.000  | 119.8717   | 99.2515  | gatB; glutamyl-tRNA(Gln) amidotransferase, B subunit |                         |    |    |   |   |   |   |
|          |                        |                      |         |         | 33.500 | 113.500 | 70.4369    | 113.5000 |                                                      |                         |    |    |   |   |   |   |
| SGO_0440 | -0.137                 | 4.572                | 0.1770  | 0.6170  | 4.000  | 9.000   | 7.3767     | 9.4028   | L-idoitol 2-dehydrogenase BH3949                     |                         |    |    |   |   |   |   |
|          |                        |                      |         |         |        | 7.000   |            | 7.0000   |                                                      |                         |    |    |   |   |   |   |
| SGO_0445 | -0.762                 | 6.115                | 0.0125  | 0.0132  | 6.000  | 23.000  | 11.0651    | 24.0293  | GTP-binding protein                                  |                         |    |    |   |   |   |   |
|          |                        |                      |         |         | 7.000  | 19.500  | 14.7182    | 19.5000  |                                                      |                         |    |    |   |   |   |   |
| SGO_0448 | -1.206                 | 3.960                | 0.0358  | 0.0691  | 1.500  | 6.500   | 2.7663     | 6.7909   | conserved hypothetical protein TIGR00488             |                         |    |    |   |   |   |   |
|          |                        |                      |         |         |        | 6.000   |            | 6.0000   |                                                      |                         |    |    |   |   |   |   |
| SGO_0454 | -0.499                 | 7.151                | 0.0878  | 0.2397  | 10.500 | 37.500  | 19.3639    | 39.1782  | conserved hypothetical protein TIGR01033             |                         |    |    |   |   |   |   |
|          |                        |                      |         |         | 20.000 | 41.500  | 42.0519    | 41.5000  |                                                      |                         |    |    |   |   |   |   |
| SGO_0455 | -0.914                 | 5.663                | 0.0166  | 0.0204  | 3.500  | 14.500  | 6.4546     | 15.1489  | lipoprotein, putative                                |                         |    |    |   |   |   |   |
|          |                        |                      |         |         | 5.500  | 17.500  | 11.5643    | 17.5000  |                                                      |                         |    |    |   |   |   |   |
| SGO_0457 | 0.099                  | 7.774                | 0.0397  | 0.0810  | 30.000 | 48.500  | 55.3254    | 50.6705  | ABC transporter, substrate-binding protein SP0148    |                         |    |    |   |   |   |   |
|          |                        |                      |         |         | 27.500 | 55.000  | 57.8213    | 55.0000  |                                                      |                         |    |    |   |   |   |   |
| SGO_0458 | 0.069                  | 9.113                | 0.0419  | 0.0868  | 74.500 | 128.000 | 137.3914   | 133.7283 | hlpA; lipoprotein                                    |                         |    |    |   |   |   |   |
|          |                        |                      |         |         | 69.500 | 136.500 | 146.1303   | 136.5000 |                                                      |                         |    |    |   |   |   |   |
| SGO_0460 | -0.117                 | 5.619                | 0.0524  | 0.1210  | 6.500  | 13.000  | 11.9872    | 13.5818  | ABC transporter, ATP-binding protein SP0151          |                         |    |    |   |   |   |   |
|          |                        |                      |         |         | 5.500  | 12.000  | 11.5643    | 12.0000  |                                                      |                         |    |    |   |   |   |   |
| SGO_0468 | -0.067                 | 5.563                | 0.2181  | 0.8046  | 7.500  | 11.000  | 13.8313    | 11.4923  | hypothetical protein SGO_0468                        |                         |    |    |   |   |   |   |
|          |                        |                      |         |         | 4.500  | 12.500  | 9.4617     | 12.5000  |                                                      |                         |    |    |   |   |   |   |
| SGO_0476 | 0.096                  | 6.290                | 0.0979  | 0.2804  | 10.500 | 19.500  | 19.3639    | 20.3727  | rhodanese family protein                             |                         |    |    |   |   |   |   |
|          |                        |                      |         |         | 10.000 | 17.500  | 21.0259    | 17.5000  |                                                      |                         |    |    |   |   |   |   |

- Show detected proteins only  
 Show all proteins

Proteins found:  
627

Filter by category:

ABC Transporter

Test

Cutoff

q-Value

p-Value

.005

|             | Signif | Direction | Applies To   |
|-------------|--------|-----------|--------------|
| Red         | yes    | +         | ratios, bars |
| Yellow      | no     | n/a       | bars         |
| Green       | yes    | -         | ratios, bars |
| Pink        | yes    | +         | p-, q-Values |
| Light Green | yes    | -         | p-, q-Values |

Dot Plots Dot Plots

Summary Table

SgFn vs Sg

SgPg vs Sg

SgPgFn vs Sg

SgPg vs SgFn

SgPgFn vs SgFn

SgPgFn vs SgPg

Coverage

SgPgFn vs SgPg

Raw

Normalized

Log<sub>2</sub> Ratios

| Protein  | SgPgFn vs SgPg         |                      |         |         | Raw     |         | Normalized |          | Description                                            | Log <sub>2</sub> Ratios |    |    |   |   |
|----------|------------------------|----------------------|---------|---------|---------|---------|------------|----------|--------------------------------------------------------|-------------------------|----|----|---|---|
|          | Log <sub>2</sub> Ratio | Log <sub>2</sub> Sum | q-Value | p-Value | SgPgFn  | SgPg    | SgPgFn     | SgPg     |                                                        | -6                      | -4 | -2 | 0 | 2 |
| SGO_0480 | -1.413                 | 5.063                | 0.0499  | 0.1131  |         | 15.000  |            | 15.6713  | hypothetical protein SGO_0480                          |                         |    |    |   |   |
|          |                        |                      |         |         | 2.500   | 12.500  | 5.2565     | 12.5000  |                                                        |                         |    |    |   |   |
| SGO_0483 | 0.069                  | 6.312                | 0.2214  | 0.8252  | 11.000  | 15.000  | 20.2860    | 15.6713  | hypothetical protein SGO_0483                          |                         |    |    |   |   |
|          |                        |                      |         |         | 9.500   | 23.500  | 19.9746    | 23.5000  |                                                        |                         |    |    |   |   |
| SGO_0501 | 0.314                  | 6.827                | 0.0037  | 0.0010  | 17.000  | 25.000  | 31.3511    | 26.1188  | Uncharacterized ACR, COG1399                           |                         |    |    |   |   |
|          |                        |                      |         |         | 15.000  | 24.500  | 31.5389    | 24.5000  |                                                        |                         |    |    |   |   |
| SGO_0502 | -0.336                 | 8.810                | 0.0263  | 0.0431  | 52.500  | 133.000 | 96.8194    | 138.9521 | floL; flotillin-like protein                           |                         |    |    |   |   |
|          |                        |                      |         |         | 48.000  | 112.000 | 100.9245   | 112.0000 |                                                        |                         |    |    |   |   |
| SGO_0503 | 0.328                  | 10.994               | 0.0086  | 0.0064  | 322.000 | 420.000 | 593.8260   | 438.7960 | gnd; 6-phosphogluconate dehydrogenase, decarboxylating |                         |    |    |   |   |
|          |                        |                      |         |         | 257.500 | 465.000 | 541.4178   | 465.0000 |                                                        |                         |    |    |   |   |
| SGO_0505 | -0.379                 | 7.786                | 0.0264  | 0.0435  | 24.000  | 53.500  | 44.2603    | 55.8943  | PTS system, IIBC component                             |                         |    |    |   |   |
|          |                        |                      |         |         | 24.500  | 69.000  | 51.5135    | 69.0000  |                                                        |                         |    |    |   |   |
| SGO_0508 | 0.202                  | 5.722                | 0.0616  | 0.1493  | 8.500   | 11.000  | 15.6755    | 11.4923  | nrdR; transcriptional regulator, NrdR family           |                         |    |    |   |   |
|          |                        |                      |         |         | 6.000   | 13.000  | 12.6156    | 13.0000  |                                                        |                         |    |    |   |   |
| SGO_0510 | -0.517                 | 5.948                | 0.0158  | 0.0183  | 7.500   | 19.000  | 13.8313    | 19.8503  | dnaI; primosomal protein DnaI                          |                         |    |    |   |   |
|          |                        |                      |         |         | 5.500   | 16.500  | 11.5643    | 16.5000  |                                                        |                         |    |    |   |   |
| SGO_0511 | 0.022                  | 4.638                | 0.2139  | 0.7868  | 4.000   | 6.000   | 7.3767     | 6.2685   | NADPH-flavin oxidoreductase -like protein              |                         |    |    |   |   |
|          |                        |                      |         |         | 2.500   | 6.000   | 5.2565     | 6.0000   |                                                        |                         |    |    |   |   |
| SGO_0512 | 0.241                  | 7.855                | 0.0443  | 0.0950  | 38.000  | 50.000  | 70.0788    | 52.2376  | GTP-binding protein engA                               |                         |    |    |   |   |
|          |                        |                      |         |         | 26.500  | 53.500  | 55.7187    | 53.5000  |                                                        |                         |    |    |   |   |
| SGO_0515 | 0.385                  | 8.219                | 0.0246  | 0.0388  | 40.500  | 61.500  | 74.6893    | 64.2523  | murC; UDP-N-acetylmuramate--alanine ligase             |                         |    |    |   |   |
|          |                        |                      |         |         | 45.000  | 64.500  | 94.6167    | 64.5000  |                                                        |                         |    |    |   |   |
| SGO_0518 | -0.123                 | 7.418                | 0.0956  | 0.2702  | 20.000  | 44.000  | 36.8836    | 45.9691  | aminodeoxychorismate lyase-like protein                |                         |    |    |   |   |
|          |                        |                      |         |         | 21.500  | 43.000  | 45.2058    | 43.0000  |                                                        |                         |    |    |   |   |

- Show detected proteins only  
 Show all proteins

Proteins found:  
627

Filter by category:

ABC Transporter

Test

Cutoff

q-Value

.005

p-Value

|             | Signif | Direction | Applies To   |
|-------------|--------|-----------|--------------|
| Red         | yes    | +         | ratios, bars |
| Yellow      | no     | n/a       | bars         |
| Green       | yes    | -         | ratios, bars |
| Pink        | yes    | +         | p-, q-Values |
| Light Green | yes    | -         | p-, q-Values |

Dot Plots Dot Plots

Summary Table

SgFn vs Sg

SgPg vs Sg

SgPgFn vs Sg

SgPg vs SgFn

SgPgFn vs SgFn

SgPgFn vs SgPg

Coverage

SgPgFn vs SgPg

Raw

Normalized

Log<sub>2</sub> Ratios

| Protein  | SgPgFn vs SgPg         |                      |         |         | Raw    |        | Normalized |         | Description                                                   | Log <sub>2</sub> Ratios |    |    |   |   |
|----------|------------------------|----------------------|---------|---------|--------|--------|------------|---------|---------------------------------------------------------------|-------------------------|----|----|---|---|
|          | Log <sub>2</sub> Ratio | Log <sub>2</sub> Sum | q-Value | p-Value | SgPgFn | SgPg   | SgPgFn     | SgPg    |                                                               | -6                      | -4 | -2 | 0 | 2 |
| SGO_0519 | -0.349                 | 6.975                | 0.0315  | 0.0556  | 14.500 | 38.000 | 26.7406    | 39.7006 | greA; transcription elongation factor greA                    |                         |    |    |   |   |
|          |                        |                      |         |         | 13.500 | 31.000 | 28.3850    | 31.0000 |                                                               |                         |    |    |   |   |
| SGO_0526 | -1.420                 | 5.561                | 0.0050  | 0.0022  | 3.000  | 18.000 | 5.5325     | 18.8055 | ilvB; acetolactate synthase, large subunit, biosynthetic type |                         |    |    |   |   |
|          |                        |                      |         |         | 3.500  | 15.500 | 7.3591     | 15.5000 |                                                               |                         |    |    |   |   |
| SGO_0527 | -1.189                 | 4.162                | 0.0867  | 0.2343  |        | 5.500  |            | 5.7461  | ilvN; acetolactate synthase, small subunit                    |                         |    |    |   |   |
|          |                        |                      |         |         | 1.500  | 9.000  | 3.1539     | 9.0000  |                                                               |                         |    |    |   |   |
| SGO_0528 | -0.289                 | 8.143                | 0.0423  | 0.0885  | 39.000 | 79.000 | 71.9230    | 82.5354 | ilvC; ketol-acid reductoisomerase                             |                         |    |    |   |   |
|          |                        |                      |         |         | 26.500 | 72.500 | 55.7187    | 72.5000 |                                                               |                         |    |    |   |   |
| SGO_0529 | -0.252                 | 4.168                | 0.1566  | 0.5093  |        | 5.000  |            | 5.2238  | ilvA; threonine dehydratase                                   |                         |    |    |   |   |
|          |                        |                      |         |         | 2.500  | 7.500  | 5.2565     | 7.5000  |                                                               |                         |    |    |   |   |
| SGO_0535 | -0.400                 | 4.343                | 0.1153  | 0.3452  | 3.000  | 6.000  | 5.5325     | 6.2685  | putative transcriptional regulator LytR                       |                         |    |    |   |   |
|          |                        |                      |         |         |        | 8.500  |            | 8.5000  |                                                               |                         |    |    |   |   |
| SGO_0536 | 0.196                  | 6.491                | 0.0198  | 0.0277  | 13.500 | 21.000 | 24.8964    | 21.9398 | hypothetical protein SGO_0536                                 |                         |    |    |   |   |
|          |                        |                      |         |         | 11.000 | 20.000 | 23.1285    | 20.0000 |                                                               |                         |    |    |   |   |
| SGO_0537 | -0.446                 | 6.219                | 0.0051  | 0.0025  | 8.000  | 20.500 | 14.7534    | 21.4174 | HIT family protein                                            |                         |    |    |   |   |
|          |                        |                      |         |         | 8.000  | 21.500 | 16.8207    | 21.5000 |                                                               |                         |    |    |   |   |
| SGO_0540 | -0.248                 | 6.654                | 0.0094  | 0.0078  | 13.000 | 25.500 | 23.9743    | 26.6412 | hypothetical protein SGO_0540                                 |                         |    |    |   |   |
|          |                        |                      |         |         | 10.500 | 28.000 | 22.0772    | 28.0000 |                                                               |                         |    |    |   |   |
| SGO_0543 | -0.355                 | 7.276                | 0.0105  | 0.0098  | 17.000 | 42.000 | 31.3511    | 43.8796 | nusA; transcription termination factor NusA                   |                         |    |    |   |   |
|          |                        |                      |         |         | 17.500 | 43.000 | 36.7954    | 43.0000 |                                                               |                         |    |    |   |   |
| SGO_0546 | -0.338                 | 8.102                | 0.0476  | 0.1054  | 27.500 | 77.500 | 50.7149    | 80.9683 | infB; Translation initiation factor IF-2                      |                         |    |    |   |   |
|          |                        |                      |         |         | 34.000 | 71.500 | 71.4882    | 71.5000 |                                                               |                         |    |    |   |   |
| SGO_0548 | -0.725                 | 4.840                | 0.0050  | 0.0019  | 3.000  | 8.000  | 5.5325     | 8.3580  | Na/Pi-cotransporter family protein                            |                         |    |    |   |   |
|          |                        |                      |         |         | 2.500  | 9.500  | 5.2565     | 9.5000  |                                                               |                         |    |    |   |   |

- Show detected proteins only  
 Show all proteins

Proteins found:  
627

Filter by category:

ABC Transporter

Test

Cutoff

q-Value

.005

p-Value

|             | Signif | Direction | Applies To   |
|-------------|--------|-----------|--------------|
| Red         | yes    | +         | ratios, bars |
| Yellow      | no     | n/a       | bars         |
| Green       | yes    | -         | ratios, bars |
| Pink        | yes    | +         | p-, q-Values |
| Light Green | yes    | -         | p-, q-Values |

Dot Plots Dot Plots

Summary Table

SgFn vs Sg

SgPg vs Sg

SgPgFn vs Sg

SgPg vs SgFn

SgPgFn vs SgFn

SgPgFn vs SgPg

Coverage

SgPgFn vs SgPg

Raw

Normalized

Log<sub>2</sub> Ratios

| Protein  | SgPgFn vs SgPg         |                      |         |         | Raw    |        | Normalized |         | Description                                             | Log <sub>2</sub> Ratios |    |    |   |   |   |   |
|----------|------------------------|----------------------|---------|---------|--------|--------|------------|---------|---------------------------------------------------------|-------------------------|----|----|---|---|---|---|
|          | Log <sub>2</sub> Ratio | Log <sub>2</sub> Sum | q-Value | p-Value | SgPgFn | SgPg   | SgPgFn     | SgPg    |                                                         | -6                      | -4 | -2 | 0 | 2 | 4 | 6 |
| SGO_0552 | -0.205                 | 6.502                | 0.0184  | 0.0242  | 12.000 | 22.500 | 22.1302    | 23.5069 | oxidoreductase, aldo/keto reductase family              |                         |    |    |   |   |   |   |
|          |                        |                      |         |         | 9.500  | 25.000 | 19.9746    | 25.0000 |                                                         |                         |    |    |   |   |   |   |
| SGO_0554 | -0.707                 | 4.799                | 0.0921  | 0.2571  | 3.500  | 8.500  | 6.4546     | 8.8804  | hsdR; type I site-specific deoxyribonuclease            |                         |    |    |   |   |   |   |
|          |                        |                      |         |         |        | 12.500 |            | 12.5000 |                                                         |                         |    |    |   |   |   |   |
| SGO_0558 | -0.093                 | 3.750                | 0.2118  | 0.7732  |        | 5.500  |            | 5.7461  | hypothetical protein SGO_0558                           |                         |    |    |   |   |   |   |
|          |                        |                      |         |         | 2.000  | 3.500  | 4.2052     | 3.5000  |                                                         |                         |    |    |   |   |   |   |
| SGO_0560 | -0.567                 | 5.174                | 0.0151  | 0.0173  | 4.500  | 11.000 | 8.2988     | 11.4923 | hsdM; type I restriction-modification system, M subunit |                         |    |    |   |   |   |   |
|          |                        |                      |         |         | 3.000  | 10.000 | 6.3078     | 10.0000 |                                                         |                         |    |    |   |   |   |   |
| SGO_0565 | -0.204                 | 7.560                | 0.0246  | 0.0387  | 23.000 | 45.500 | 42.4161    | 47.5362 | adhA; alcohol dehydrogenase                             |                         |    |    |   |   |   |   |
|          |                        |                      |         |         | 21.500 | 53.500 | 45.2058    | 53.5000 |                                                         |                         |    |    |   |   |   |   |
| SGO_0568 | -0.346                 | 6.590                | 0.0499  | 0.1129  | 9.500  | 24.000 | 17.5197    | 25.0741 | glyQ; glycyl-tRNA synthetase, alpha subunit             |                         |    |    |   |   |   |   |
|          |                        |                      |         |         | 12.000 | 28.500 | 25.2311    | 28.5000 |                                                         |                         |    |    |   |   |   |   |
| SGO_0569 | -0.173                 | 8.079                | 0.1338  | 0.4182  | 28.000 | 67.000 | 51.6370    | 69.9984 | glyS; glycyl-tRNA synthetase, beta subunit              |                         |    |    |   |   |   |   |
|          |                        |                      |         |         | 36.500 | 72.000 | 76.7447    | 72.0000 |                                                         |                         |    |    |   |   |   |   |
| SGO_0573 | -1.078                 | 5.593                | 0.0120  | 0.0121  | 3.000  | 16.000 | 5.5325     | 16.7160 | mraW; S-adenosyl-methyltransferase MraW                 |                         |    |    |   |   |   |   |
|          |                        |                      |         |         | 5.000  | 15.500 | 10.5130    | 15.5000 |                                                         |                         |    |    |   |   |   |   |
| SGO_0577 | -0.602                 | 6.863                | 0.0238  | 0.0368  | 10.000 | 35.500 | 18.4418    | 37.0887 | ATP-dependent RNA helicase                              |                         |    |    |   |   |   |   |
|          |                        |                      |         |         | 13.500 | 32.500 | 28.3850    | 32.5000 |                                                         |                         |    |    |   |   |   |   |
| SGO_0581 | -0.856                 | 5.563                | 0.0121  | 0.0124  | 4.500  | 12.500 | 8.2988     | 13.0594 | trxB; thioredoxin-disulfide reductase                   |                         |    |    |   |   |   |   |
|          |                        |                      |         |         | 4.000  | 17.500 | 8.4104     | 17.5000 |                                                         |                         |    |    |   |   |   |   |
| SGO_0582 | -0.827                 | 7.536                | 0.0224  | 0.0331  | 21.500 | 47.000 | 39.6499    | 49.1034 | nicotinate phosphoribosyltransferase, putative          |                         |    |    |   |   |   |   |
|          |                        |                      |         |         | 13.000 | 69.500 | 27.3337    | 69.5000 |                                                         |                         |    |    |   |   |   |   |
| SGO_0583 | -0.613                 | 5.640                | 0.0045  | 0.0014  | 5.000  | 14.000 | 9.2209     | 14.6265 | nadE; NAD <sup>+</sup> synthetase                       |                         |    |    |   |   |   |   |
|          |                        |                      |         |         | 5.000  | 15.500 | 10.5130    | 15.5000 |                                                         |                         |    |    |   |   |   |   |

- Show detected proteins only  
 Show all proteins

Proteins found:  
627

Filter by category:

ABC Transporter

Test

Cutoff

q-Value

.005

p-Value

|             | Signif | Direction | Applies To                |
|-------------|--------|-----------|---------------------------|
| Red         | yes    | +         | ratios, bars              |
| Yellow      | no     | n/a       | bars                      |
| Green       | yes    | -         | ratios, bars              |
| Pink        | yes    | +         | p <sup>-</sup> , q-Values |
| Light Green | yes    | -         | p <sup>-</sup> , q-Values |

Dot Plots Dot Plots

Summary Table

SgFn vs Sg

SgPg vs Sg

SgPgFn vs Sg

SgPg vs SgFn

SgPgFn vs SgFn

SgPgFn vs SgPg

Coverage

SgPgFn vs SgPg

Raw

Normalized

Log<sub>2</sub> Ratios

| Protein  | SgPgFn vs SgPg         |                      |         |         | Raw    |        | Normalized |         | Description                                 | Log <sub>2</sub> Ratios |    |    |   |   |
|----------|------------------------|----------------------|---------|---------|--------|--------|------------|---------|---------------------------------------------|-------------------------|----|----|---|---|
|          | Log <sub>2</sub> Ratio | Log <sub>2</sub> Sum | q-Value | p-Value | SgPgFn | SgPg   | SgPgFn     | SgPg    |                                             | -6                      | -4 | -2 | 0 | 2 |
| SGO_0585 | -0.393                 | 6.850                | 0.0426  | 0.0898  | 15.000 | 36.000 | 27.6627    | 37.6111 | pepC; aminopeptidase C                      |                         |    |    |   |   |
|          |                        |                      |         |         | 10.500 | 28.000 | 22.0772    | 28.0000 |                                             |                         |    |    |   |   |
| SGO_0586 | -0.529                 | 7.227                | 0.0163  | 0.0197  | 15.500 | 47.000 | 28.5848    | 49.1034 | pbp1a; penicillin-binding protein 1A        |                         |    |    |   |   |
|          |                        |                      |         |         | 15.500 | 39.500 | 32.5902    | 39.5000 |                                             |                         |    |    |   |   |
| SGO_0589 | -0.265                 | 7.239                | 0.0979  | 0.2806  | 21.000 | 31.500 | 38.7278    | 32.9097 | methylase                                   |                         |    |    |   |   |
|          |                        |                      |         |         | 14.000 | 50.000 | 29.4363    | 50.0000 |                                             |                         |    |    |   |   |
| SGO_0590 | -0.575                 | 4.491                | 0.1229  | 0.3763  | 3.000  | 10.000 | 5.5325     | 10.4475 | Methyltransferase                           |                         |    |    |   |   |
|          |                        |                      |         |         |        | 6.500  |            | 6.5000  |                                             |                         |    |    |   |   |
| SGO_0591 | -0.545                 | 6.487                | 0.0058  | 0.0034  | 9.000  | 25.500 | 16.5976    | 26.6412 | hypothetical protein SGO_0591               |                         |    |    |   |   |
|          |                        |                      |         |         | 9.500  | 26.500 | 19.9746    | 26.5000 |                                             |                         |    |    |   |   |
| SGO_0592 | -0.928                 | 5.148                | 0.0264  | 0.0438  | 4.000  | 13.000 | 7.3767     | 13.5818 | luxS; autoinducer-2 production protein LuxS |                         |    |    |   |   |
|          |                        |                      |         |         |        | 14.500 |            | 14.5000 |                                             |                         |    |    |   |   |
| SGO_0593 | -0.945                 | 6.782                | 0.0089  | 0.0068  | 12.000 | 37.500 | 22.1302    | 39.1782 | HD/KH domain protein                        |                         |    |    |   |   |
|          |                        |                      |         |         | 7.500  | 33.000 | 15.7695    | 33.0000 |                                             |                         |    |    |   |   |
| SGO_0594 | -0.285                 | 5.592                | 0.0336  | 0.0621  | 5.500  | 11.500 | 10.1430    | 12.0147 | gmk; Guanylate kinase (GMP kinase)          |                         |    |    |   |   |
|          |                        |                      |         |         | 5.500  | 14.500 | 11.5643    | 14.5000 |                                             |                         |    |    |   |   |
| SGO_0595 | -0.365                 | 6.369                | 0.0086  | 0.0063  | 10.500 | 22.000 | 19.3639    | 22.9846 | DNA-directed RNA polymerase, omega subunit  |                         |    |    |   |   |
|          |                        |                      |         |         | 8.000  | 23.500 | 16.8207    | 23.5000 |                                             |                         |    |    |   |   |
| SGO_0597 | -0.930                 | 5.400                | 0.0057  | 0.0031  | 4.500  | 14.000 | 8.2988     | 14.6265 | fmt; methionyl-tRNA formyltransferase       |                         |    |    |   |   |
|          |                        |                      |         |         | 3.000  | 13.000 | 6.3078     | 13.0000 |                                             |                         |    |    |   |   |
| SGO_0599 | -0.192                 | 6.080                | 0.1225  | 0.3743  | 7.000  | 18.500 | 12.9093    | 19.3279 | phosphoprotein phosphatase                  |                         |    |    |   |   |
|          |                        |                      |         |         | 9.000  | 16.500 | 18.9233    | 16.5000 |                                             |                         |    |    |   |   |
| SGO_0600 | -0.833                 | 5.248                | 0.0549  | 0.1291  | 4.500  | 15.500 | 8.2988     | 16.1937 | serine/threonine protein kinase             |                         |    |    |   |   |
|          |                        |                      |         |         |        | 13.500 |            | 13.5000 |                                             |                         |    |    |   |   |

- Show detected proteins only  
 Show all proteins

Proteins found:  
627

Filter by category:

ABC Transporter

Test

Cutoff

q-Value

.005

p-Value

|             | Signif | Direction | Applies To   |
|-------------|--------|-----------|--------------|
| Red         | yes    | +         | ratios, bars |
| Yellow      | no     | n/a       | bars         |
| Green       | yes    | -         | ratios, bars |
| Pink        | yes    | +         | p-, q-Values |
| Light Green | yes    | -         | p-, q-Values |

Dot Plots Dot Plots

Summary Table

SgFn vs Sg

SgPg vs Sg

SgPgFn vs Sg

SgPg vs SgFn

SgPgFn vs SgFn

SgPgFn vs SgPg

Coverage

SgPgFn vs SgPg

Raw

Normalized

Log<sub>2</sub> Ratios

| Protein  | SgPgFn vs SgPg         |                      |         |         | Raw    |         | Normalized |          | Description                                                                                   | Log <sub>2</sub> Ratios |    |    |   |   |   |   |
|----------|------------------------|----------------------|---------|---------|--------|---------|------------|----------|-----------------------------------------------------------------------------------------------|-------------------------|----|----|---|---|---|---|
|          | Log <sub>2</sub> Ratio | Log <sub>2</sub> Sum | q-Value | p-Value | SgPgFn | SgPg    | SgPgFn     | SgPg     |                                                                                               | -6                      | -4 | -2 | 0 | 2 | 4 | 6 |
| SGO_0604 | -0.281                 | 7.730                | 0.0121  | 0.0124  | 27.500 | 54.000  | 50.7149    | 56.4166  | hydrolase, haloacid dehalogenase family/peptidyl-prolyl cis-trans isomerase, cyclophilin type |                         |    |    |   |   |   |   |
|          |                        |                      |         |         | 21.500 | 60.000  | 45.2058    | 60.0000  |                                                                                               |                         |    |    |   |   |   |   |
| SGO_0606 | -0.116                 | 8.560                | 0.0452  | 0.0978  | 48.000 | 89.000  | 88.5206    | 92.9830  | cysK; cysteine synthase A                                                                     |                         |    |    |   |   |   |   |
|          |                        |                      |         |         | 44.000 | 103.500 | 92.5141    | 103.5000 |                                                                                               |                         |    |    |   |   |   |   |
| SGO_0610 | -0.202                 | 8.303                | 0.1450  | 0.4632  | 50.000 | 84.500  | 92.2090    | 88.2816  | ribosomal subunit interface protein                                                           |                         |    |    |   |   |   |   |
|          |                        |                      |         |         | 27.000 | 78.500  | 56.7700    | 78.5000  |                                                                                               |                         |    |    |   |   |   |   |
| SGO_0626 | -0.391                 | 4.073                | 0.1141  | 0.3401  | 2.500  | 5.000   | 4.6104     | 5.2238   | recX; Regulatory protein recX                                                                 |                         |    |    |   |   |   |   |
|          |                        |                      |         |         |        | 7.000   |            | 7.0000   |                                                                                               |                         |    |    |   |   |   |   |
| SGO_0631 | -1.276                 | 6.339                | 0.0012  | 0.0001  | 6.000  | 28.000  | 11.0651    | 29.2531  | alpha-glycerophosphate oxidase                                                                |                         |    |    |   |   |   |   |
|          |                        |                      |         |         | 6.000  | 28.000  | 12.6156    | 28.0000  |                                                                                               |                         |    |    |   |   |   |   |
| SGO_0632 | -0.428                 | 5.532                | 0.0101  | 0.0091  | 5.000  | 12.000  | 9.2209     | 12.5370  | glpK; glycerol kinase                                                                         |                         |    |    |   |   |   |   |
|          |                        |                      |         |         | 5.000  | 14.000  | 10.5130    | 14.0000  |                                                                                               |                         |    |    |   |   |   |   |
| SGO_0639 | -0.483                 | 7.708                | 0.0168  | 0.0211  | 27.000 | 55.500  | 49.7929    | 57.9838  | valS; valyl-tRNA synthetase                                                                   |                         |    |    |   |   |   |   |
|          |                        |                      |         |         | 18.000 | 63.500  | 37.8467    | 63.5000  |                                                                                               |                         |    |    |   |   |   |   |
| SGO_0640 | 2.176                  | 4.306                | 0.0195  | 0.0266  |        | 2.500   |            | 2.6119   | modification methylase                                                                        |                         |    |    |   |   |   |   |
|          |                        |                      |         |         | 6.500  | 3.500   | 13.6669    | 3.5000   |                                                                                               |                         |    |    |   |   |   |   |
| SGO_0641 | -0.693                 | 6.206                | 0.0057  | 0.0032  | 8.500  | 22.500  | 15.6755    | 23.5069  | ATPase, histidine kinase-, DNA gyrase B-, and HSP90-like domain protein protein               |                         |    |    |   |   |   |   |
|          |                        |                      |         |         | 6.000  | 22.000  | 12.6156    | 22.0000  |                                                                                               |                         |    |    |   |   |   |   |
| SGO_0642 | 2.641                  | 7.544                | 0.0019  | 0.0003  | 46.500 | 15.000  | 85.7544    | 15.6713  | hypothetical protein SGO_0642                                                                 |                         |    |    |   |   |   |   |
|          |                        |                      |         |         | 35.500 | 10.500  | 74.6421    | 10.5000  |                                                                                               |                         |    |    |   |   |   |   |
| SGO_0643 | -0.102                 | 3.563                | 0.2074  | 0.7545  | 2.000  | 3.000   | 3.6884     | 3.1343   | cytosine-specific methyltransferase                                                           |                         |    |    |   |   |   |   |
|          |                        |                      |         |         |        | 5.000   |            | 5.0000   |                                                                                               |                         |    |    |   |   |   |   |
| SGO_0644 | -0.638                 | 6.594                | 0.0262  | 0.0428  | 9.000  | 33.000  | 16.5976    | 34.4768  | hypothetical protein SGO_0644                                                                 |                         |    |    |   |   |   |   |
|          |                        |                      |         |         | 10.000 | 24.500  | 21.0259    | 24.5000  |                                                                                               |                         |    |    |   |   |   |   |

 Show detected proteins only Show all proteinsProteins found:  
627 Filter by category:

ABC Transporter

Test

Cutoff

q-Value

.005

p-Value

|             | Signif | Direction | Applies To   |
|-------------|--------|-----------|--------------|
| Red         | yes    | +         | ratios, bars |
| Yellow      | no     | n/a       | bars         |
| Green       | yes    | -         | ratios, bars |
| Pink        | yes    | +         | p-, q-Values |
| Light Green | yes    | -         | p-, q-Values |

Dot Plots Dot Plots

Summary Table

SgFn vs Sg

SgPg vs Sg

SgPgFn vs Sg

SgPg vs SgFn

SgPgFn vs SgFn

SgPgFn vs SgPg

Coverage

SgPgFn vs SgPg

Raw

Normalized

Log<sub>2</sub> Ratios

| Protein  | SgPgFn vs SgPg         |                      |         |         | Raw     |         | Normalized |          | Description                                                            | Log <sub>2</sub> Ratios |    |    |   |   |
|----------|------------------------|----------------------|---------|---------|---------|---------|------------|----------|------------------------------------------------------------------------|-------------------------|----|----|---|---|
|          | Log <sub>2</sub> Ratio | Log <sub>2</sub> Sum | q-Value | p-Value | SgPgFn  | SgPg    | SgPgFn     | SgPg     |                                                                        | -6                      | -4 | -2 | 0 | 2 |
| SGO_0652 | 0.499                  | 4.282                | 0.1697  | 0.5840  | 3.500   | 6.500   | 6.4546     | 6.7909   | hypothetical protein SGO_0652                                          |                         |    |    |   |   |
|          |                        |                      |         |         | 2.000   | 2.000   | 4.2052     | 2.0000   |                                                                        |                         |    |    |   |   |
| SGO_0654 | -0.541                 | 6.872                | 0.0183  | 0.0237  | 14.500  | 30.000  | 26.7406    | 31.3426  | radical SAM enzyme, Cfr family                                         |                         |    |    |   |   |
|          |                        |                      |         |         | 10.000  | 38.000  | 21.0259    | 38.0000  |                                                                        |                         |    |    |   |   |
| SGO_0656 | -0.070                 | 4.817                | 0.2354  | 0.8955  | 5.500   | 7.500   | 10.1430    | 7.8356   | trpB-2; tryptophan synthase, beta subunit                              |                         |    |    |   |   |
|          |                        |                      |         |         | 2.000   | 6.000   | 4.2052     | 6.0000   |                                                                        |                         |    |    |   |   |
| SGO_0665 | -0.084                 | 9.511                | 0.2049  | 0.7441  | 115.500 | 165.000 | 213.0028   | 172.3842 | non-heme iron-containing ferritin                                      |                         |    |    |   |   |
|          |                        |                      |         |         | 68.500  | 200.000 | 144.0277   | 200.0000 |                                                                        |                         |    |    |   |   |
| SGO_0669 | -0.054                 | 7.888                | 0.0984  | 0.2826  | 30.000  | 57.500  | 55.3254    | 60.0733  | typA; GTP-binding protein TypA                                         |                         |    |    |   |   |
|          |                        |                      |         |         | 29.000  | 60.500  | 60.9752    | 60.5000  |                                                                        |                         |    |    |   |   |
| SGO_0671 | -1.181                 | 6.393                | 0.0058  | 0.0033  | 6.500   | 31.000  | 11.9872    | 32.3873  | murD; UDP-N-acetylmuramoylalanine--D-glutamate ligase                  |                         |    |    |   |   |
|          |                        |                      |         |         | 6.500   | 26.000  | 13.6669    | 26.0000  |                                                                        |                         |    |    |   |   |
| SGO_0672 | -1.747                 | 4.555                | 0.1156  | 0.3479  | 1.500   | 5.500   | 2.7663     | 5.7461   | murG; undecaprenyl-PP-MurNac-pentapeptide-UDPGlcNac GlcNac transferase |                         |    |    |   |   |
|          |                        |                      |         |         |         | 15.000  |            | 15.0000  |                                                                        |                         |    |    |   |   |
| SGO_0673 | 0.012                  | 2.877                |         |         | 2.000   | 3.500   | 3.6884     | 3.6566   | DivIB; cell division protein DivIB                                     |                         |    |    |   |   |
|          |                        |                      |         |         |         |         |            |          |                                                                        |                         |    |    |   |   |
| SGO_0674 | 0.070                  | 8.796                | 0.0972  | 0.2773  | 58.500  | 107.500 | 107.8845   | 112.3109 | ftsA; cell division protein FtsA                                       |                         |    |    |   |   |
|          |                        |                      |         |         | 57.000  | 104.500 | 119.8478   | 104.5000 |                                                                        |                         |    |    |   |   |
| SGO_0675 | 0.353                  | 9.672                | 0.0028  | 0.0006  | 121.000 | 171.500 | 223.1458   | 179.1750 | ftsZ; cell division protein FtsZ                                       |                         |    |    |   |   |
|          |                        |                      |         |         | 111.500 | 179.000 | 234.4392   | 179.0000 |                                                                        |                         |    |    |   |   |
| SGO_0676 | -0.215                 | 5.555                | 0.0878  | 0.2400  | 6.000   | 10.000  | 11.0651    | 10.4475  | conserved hypothetical protein TIGR00044                               |                         |    |    |   |   |
|          |                        |                      |         |         | 5.000   | 15.000  | 10.5130    | 15.0000  |                                                                        |                         |    |    |   |   |
| SGO_0677 | -0.108                 | 7.445                | 0.2139  | 0.7877  | 29.000  | 37.500  | 53.4812    | 39.1782  | yImF protein                                                           |                         |    |    |   |   |
|          |                        |                      |         |         | 15.000  | 50.000  | 31.5389    | 50.0000  |                                                                        |                         |    |    |   |   |

- Show detected proteins only  
 Show all proteins

Proteins found:  
627

Filter by category:

ABC Transporter

Test

Cutoff

q-Value

.005

p-Value

|             | Signif | Direction | Applies To   |
|-------------|--------|-----------|--------------|
| Red         | yes    | +         | ratios, bars |
| Yellow      | no     | n/a       | bars         |
| Green       | yes    | -         | ratios, bars |
| Pink        | yes    | +         | p-, q-Values |
| Light Green | yes    | -         | p-, q-Values |

Dot Plots Dot Plots



Summary Table

SgFn vs Sg

SgPg vs Sg

SgPgFn vs Sg

SgPg vs SgFn

SgPgFn vs SgFn

SgPgFn vs SgPg

Coverage

SgPgFn vs SgPg

Raw

Normalized

Log<sub>2</sub> Ratios

| Protein  | SgPgFn vs SgPg         |                      |         |         | Raw     |          | Normalized |           | Description                                                     | Log <sub>2</sub> Ratios |    |    |   |   |   |   |
|----------|------------------------|----------------------|---------|---------|---------|----------|------------|-----------|-----------------------------------------------------------------|-------------------------|----|----|---|---|---|---|
|          | Log <sub>2</sub> Ratio | Log <sub>2</sub> Sum | q-Value | p-Value | SgPgFn  | SgPg     | SgPgFn     | SgPg      |                                                                 | -6                      | -4 | -2 | 0 | 2 | 4 | 6 |
| SGO_0680 | -0.460                 | 8.674                | 0.0226  | 0.0338  | 41.000  | 103.000  | 75.6114    | 107.6095  | cell division protein DivIVA                                    |                         |    |    |   |   |   |   |
|          |                        |                      |         |         | 46.000  | 128.500  | 96.7193    | 128.5000  |                                                                 |                         |    |    |   |   |   |   |
| SGO_0681 | -0.526                 | 8.524                | 0.0026  | 0.0005  | 42.500  | 106.000  | 78.3776    | 110.7438  | ileS; isoleucyl-tRNA synthetase                                 |                         |    |    |   |   |   |   |
|          |                        |                      |         |         | 34.500  | 106.500  | 72.5395    | 106.5000  |                                                                 |                         |    |    |   |   |   |   |
| SGO_0684 | 0.708                  | 7.087                | 0.0016  | 0.0002  | 23.500  | 25.000   | 43.3382    | 26.1188   | hypothetical protein SGO_0684                                   |                         |    |    |   |   |   |   |
|          |                        |                      |         |         | 19.500  | 25.500   | 41.0006    | 25.5000   |                                                                 |                         |    |    |   |   |   |   |
| SGO_0688 | -0.500                 | 7.374                | 0.0031  | 0.0007  | 19.000  | 48.000   | 35.0394    | 50.1481   | ATP dependent Clp protease, ATP-binding subunit, ClpE           |                         |    |    |   |   |   |   |
|          |                        |                      |         |         | 16.000  | 47.000   | 33.6415    | 47.0000   |                                                                 |                         |    |    |   |   |   |   |
| SGO_0693 | 0.248                  | 3.226                | 0.2508  | 0.9789  |         | 4.500    |            | 4.7014    | xseA; exodeoxyribonuclease VII, large subunit                   |                         |    |    |   |   |   |   |
|          |                        |                      |         |         | 1.500   | 1.500    | 3.1539     | 1.5000    |                                                                 |                         |    |    |   |   |   |   |
| SGO_0700 | -0.692                 | 5.746                | 0.0354  | 0.0673  | 4.000   | 14.000   | 7.3767     | 14.6265   | DegV family protein                                             |                         |    |    |   |   |   |   |
|          |                        |                      |         |         | 6.500   | 18.000   | 13.6669    | 18.0000   |                                                                 |                         |    |    |   |   |   |   |
| SGO_0701 | -0.065                 | 12.543               | 0.1866  | 0.6611  | 898.500 | 1475.000 | 1656.9957  | 1541.0098 | hup; DNA-binding histone-like protein HU                        |                         |    |    |   |   |   |   |
|          |                        |                      |         |         | 605.000 | 1496.500 | 1272.0691  | 1496.5000 |                                                                 |                         |    |    |   |   |   |   |
| SGO_0704 | 0.640                  | 11.588               | 0.0012  | 0.0001  | 501.500 | 559.500  | 924.8563   | 584.5390  | gpmA; 2,3-bisphosphoglycerate-dependent phosphoglycerate mutase |                         |    |    |   |   |   |   |
|          |                        |                      |         |         | 452.000 | 619.500  | 950.3723   | 619.5000  |                                                                 |                         |    |    |   |   |   |   |
| SGO_0706 | -0.152                 | 4.568                | 0.0575  | 0.1368  |         | 8.000    |            | 8.3580    | phoH-like protein                                               |                         |    |    |   |   |   |   |
|          |                        |                      |         |         | 3.500   | 8.000    | 7.3591     | 8.0000    |                                                                 |                         |    |    |   |   |   |   |
| SGO_0707 | 0.154                  | 4.307                | 0.1982  | 0.7097  | 4.000   | 6.000    | 7.3767     | 6.2685    | LPXTG cell wall surface protein                                 |                         |    |    |   |   |   |   |
|          |                        |                      |         |         | 1.500   | 3.000    | 3.1539     | 3.0000    |                                                                 |                         |    |    |   |   |   |   |
| SGO_0708 | 0.009                  | 9.410                | 0.2272  | 0.8553  | 83.500  | 162.000  | 153.9890   | 169.2499  | ald; alanine dehydrogenase                                      |                         |    |    |   |   |   |   |
|          |                        |                      |         |         | 89.500  | 169.000  | 188.1821   | 169.0000  |                                                                 |                         |    |    |   |   |   |   |
| SGO_0713 | -0.181                 | 6.841                | 0.0893  | 0.2463  | 16.000  | 32.500   | 29.5069    | 33.9545   | sgg; GTP-binding protein Era                                    |                         |    |    |   |   |   |   |
|          |                        |                      |         |         | 11.500  | 27.000   | 24.1798    | 27.0000   |                                                                 |                         |    |    |   |   |   |   |

- Show detected proteins only  
 Show all proteins

Proteins found:  
627

Filter by category:

ABC Transporter

Test

Cutoff

q-Value

.005

p-Value

|             | Signif | Direction | Applies To   |
|-------------|--------|-----------|--------------|
| Red         | yes    | +         | ratios, bars |
| Yellow      | no     | n/a       | bars         |
| Green       | yes    | -         | ratios, bars |
| Pink        | yes    | +         | p-, q-Values |
| Light Green | yes    | -         | p-, q-Values |

Dot Plots Dot Plots

Summary Table

SgFn vs Sg

SgPg vs Sg

SgPgFn vs Sg

SgPg vs SgFn

SgPgFn vs SgFn

SgPgFn vs SgPg

Coverage

SgPgFn vs SgPg

Raw

Normalized

Log<sub>2</sub> Ratios

| Protein  | SgPgFn vs SgPg         |                      |         |         | Raw    |         | Normalized |          | Description                                           | Log <sub>2</sub> Ratios |    |    |   |   |   |
|----------|------------------------|----------------------|---------|---------|--------|---------|------------|----------|-------------------------------------------------------|-------------------------|----|----|---|---|---|
|          | Log <sub>2</sub> Ratio | Log <sub>2</sub> Sum | q-Value | p-Value | SgPgFn | SgPg    | SgPgFn     | SgPg     |                                                       | -6                      | -4 | -2 | 0 | 2 | 4 |
| SGO_0721 | 0.174                  | 5.042                | 0.1577  | 0.5139  | 7.000  | 6.000   | 12.9093    | 6.2685   | abpB-like dipeptidase lipoprotein                     |                         |    |    |   |   |   |
|          |                        |                      |         |         | 2.500  | 8.500   | 5.2565     | 8.5000   |                                                       |                         |    |    |   |   |   |
| SGO_0736 | -0.914                 | 3.749                | 0.0956  | 0.2697  | 1.500  | 4.000   | 2.7663     | 4.1790   | hprK; HPr(Ser) kinase/phosphatase                     |                         |    |    |   |   |   |
|          |                        |                      |         |         |        | 6.500   |            | 6.5000   |                                                       |                         |    |    |   |   |   |
| SGO_0739 | -0.130                 | 5.795                | 0.0902  | 0.2502  | 7.500  | 12.500  | 13.8313    | 13.0594  | hypothetical protein SGO_0739                         |                         |    |    |   |   |   |
|          |                        |                      |         |         | 6.000  | 16.000  | 12.6156    | 16.0000  |                                                       |                         |    |    |   |   |   |
| SGO_0742 | -0.174                 | 5.394                | 0.0184  | 0.0243  | 7.000  | 14.000  | 12.9093    | 14.6265  | peptidase, U32 family                                 |                         |    |    |   |   |   |
|          |                        |                      |         |         |        | 14.500  |            | 14.5000  |                                                       |                         |    |    |   |   |   |
| SGO_0743 | -0.062                 | 6.660                | 0.2296  | 0.8666  | 10.500 | 28.000  | 19.3639    | 29.2531  | peptidase, U32 family                                 |                         |    |    |   |   |   |
|          |                        |                      |         |         | 14.500 | 22.000  | 30.4876    | 22.0000  |                                                       |                         |    |    |   |   |   |
| SGO_0745 | -0.380                 | 7.571                | 0.0455  | 0.0988  | 27.000 | 48.500  | 49.7929    | 50.6705  | hypothetical protein SGO_0745                         |                         |    |    |   |   |   |
|          |                        |                      |         |         | 16.000 | 56.000  | 33.6415    | 56.0000  |                                                       |                         |    |    |   |   |   |
| SGO_0749 | -0.672                 | 6.517                | 0.0067  | 0.0042  | 10.000 | 29.000  | 18.4418    | 30.2978  | glutathione reductase                                 |                         |    |    |   |   |   |
|          |                        |                      |         |         | 8.000  | 26.000  | 16.8207    | 26.0000  |                                                       |                         |    |    |   |   |   |
| SGO_0750 | -0.828                 | 8.970                | 0.0037  | 0.0010  | 52.500 | 160.000 | 96.8194    | 167.1604 | efflux transporter, RND family, MFP subunit subfamily |                         |    |    |   |   |   |
|          |                        |                      |         |         | 40.000 | 153.500 | 84.1037    | 153.5000 |                                                       |                         |    |    |   |   |   |
| SGO_0751 | 0.061                  | 7.986                | 0.1979  | 0.7045  | 37.500 | 67.500  | 69.1567    | 70.5208  | ABC transporter, ATP-binding protein SP0786           |                         |    |    |   |   |   |
|          |                        |                      |         |         | 28.500 | 54.000  | 59.9239    | 54.0000  |                                                       |                         |    |    |   |   |   |
| SGO_0752 | -1.583                 | 5.463                | 0.0073  | 0.0049  |        | 18.000  |            | 18.8055  | ABC transporter, ATP-binding protein                  |                         |    |    |   |   |   |
|          |                        |                      |         |         | 3.000  | 19.000  | 6.3078     | 19.0000  |                                                       |                         |    |    |   |   |   |
| SGO_0753 | -0.152                 | 8.582                | 0.0514  | 0.1174  | 46.000 | 101.500 | 84.8323    | 106.0424 | lysS; lysyl-tRNA synthetase                           |                         |    |    |   |   |   |
|          |                        |                      |         |         | 46.000 | 95.500  | 96.7193    | 95.5000  |                                                       |                         |    |    |   |   |   |
| SGO_0755 | -0.930                 | 4.679                | 0.0843  | 0.2256  |        | 8.000   |            | 8.3580   | regulatory protein                                    |                         |    |    |   |   |   |
|          |                        |                      |         |         | 2.500  | 12.000  | 5.2565     | 12.0000  |                                                       |                         |    |    |   |   |   |

- Show detected proteins only  
 Show all proteins

Proteins found:  
627

Filter by category:

ABC Transporter

Test

Cutoff

q-Value

.005

p-Value

|             | Signif | Direction | Applies To   |
|-------------|--------|-----------|--------------|
| Red         | yes    | +         | ratios, bars |
| Yellow      | no     | n/a       | bars         |
| Green       | yes    | -         | ratios, bars |
| Pink        | yes    | +         | p-, q-Values |
| Light Green | yes    | -         | p-, q-Values |

Dot Plots Dot Plots

Summary Table

SgFn vs Sg

SgPg vs Sg

SgPgFn vs Sg

SgPg vs SgFn

SgPgFn vs SgFn

SgPgFn vs SgPg

Coverage

SgPgFn vs SgPg

Raw

Normalized

Log<sub>2</sub> Ratios

| Protein  | SgPgFn vs SgPg         |                      |         |         | Raw      |          | Normalized |           | Description                                               | Log <sub>2</sub> Ratios |    |    |   |   |
|----------|------------------------|----------------------|---------|---------|----------|----------|------------|-----------|-----------------------------------------------------------|-------------------------|----|----|---|---|
|          | Log <sub>2</sub> Ratio | Log <sub>2</sub> Sum | q-Value | p-Value | SgPgFn   | SgPg     | SgPgFn     | SgPg      |                                                           | -6                      | -4 | -2 | 0 | 2 |
| SGO_0760 | -0.184                 | 8.944                | 0.0275  | 0.0469  | 67.000   | 125.500  | 123.5601   | 131.1164  | ppc; phosphoenolpyruvate carboxylase                      |                         |    |    |   |   |
|          |                        |                      |         |         | 51.000   | 130.500  | 107.2323   | 130.5000  |                                                           |                         |    |    |   |   |
| SGO_0761 | 0.194                  | 13.234               | 0.0122  | 0.0126  | 1410.000 | 2246.500 | 2600.2938  | 2347.0363 | tuf; translation elongation factor Tu                     |                         |    |    |   |   |
|          |                        |                      |         |         | 1207.500 | 2149.500 | 2538.8817  | 2149.5000 |                                                           |                         |    |    |   |   |
| SGO_0762 | 0.307                  | 11.217               | 0.0902  | 0.2505  | 436.000  | 581.000  | 804.0625   | 607.0012  | tpiA; triosephosphate isomerase                           |                         |    |    |   |   |
|          |                        |                      |         |         | 247.000  | 449.500  | 519.3406   | 449.5000  |                                                           |                         |    |    |   |   |
| SGO_0763 | -0.462                 | 6.864                | 0.0656  | 0.1614  | 17.500   | 29.500   | 32.2731    | 30.8202   | murA-1; UDP-N-acetylglucosamine 1-carboxyvinyltransferase |                         |    |    |   |   |
|          |                        |                      |         |         | 8.500    | 35.500   | 17.8720    | 35.5000   |                                                           |                         |    |    |   |   |
| SGO_0771 | -0.580                 | 8.022                | 0.0012  | 0.0001  | 28.000   | 73.000   | 51.6370    | 76.2669   | pepq; proline dipeptidase                                 |                         |    |    |   |   |
|          |                        |                      |         |         | 25.000   | 79.500   | 52.5648    | 79.5000   |                                                           |                         |    |    |   |   |
| SGO_0773 | -0.086                 | 8.013                | 0.1168  | 0.3541  | 32.000   | 68.500   | 59.0138    | 71.5655   | ccpA; catabolite control protein A                        |                         |    |    |   |   |
|          |                        |                      |         |         | 31.500   | 61.500   | 66.2317    | 61.5000   |                                                           |                         |    |    |   |   |
| SGO_0774 | -0.279                 | 5.141                | 0.1579  | 0.5182  | 5.500    | 14.500   | 10.1430    | 15.1489   | glycosyl transferase, group 1 family protein              |                         |    |    |   |   |
|          |                        |                      |         |         |          | 10.000   |            | 10.0000   |                                                           |                         |    |    |   |   |
| SGO_0775 | -0.443                 | 5.309                | 0.0248  | 0.0395  | 4.500    | 9.500    | 8.2988     | 9.9251    | glycosyl transferase, group 1                             |                         |    |    |   |   |
|          |                        |                      |         |         | 4.000    | 13.000   | 8.4104     | 13.0000   |                                                           |                         |    |    |   |   |
| SGO_0778 | -0.280                 | 8.523                | 0.0045  | 0.0014  | 45.000   | 94.000   | 82.9881    | 98.2067   | thrS; threonyl-tRNA synthetase                            |                         |    |    |   |   |
|          |                        |                      |         |         | 39.500   | 103.500  | 83.0524    | 103.5000  |                                                           |                         |    |    |   |   |
| SGO_0779 | -1.405                 | 5.902                | 0.0158  | 0.0186  | 6.500    | 23.500   | 11.9872    | 24.5517   | response regulator                                        |                         |    |    |   |   |
|          |                        |                      |         |         | 2.500    | 18.000   | 5.2565     | 18.0000   |                                                           |                         |    |    |   |   |
| SGO_0784 | -1.117                 | 6.222                | 0.0007  | 0.0000  | 6.500    | 24.000   | 11.9872    | 25.0741   | smc; chromosome segregation protein SMC                   |                         |    |    |   |   |
|          |                        |                      |         |         | 5.500    | 26.000   | 11.5643    | 26.0000   |                                                           |                         |    |    |   |   |
| SGO_0786 | -0.423                 | 5.701                | 0.0238  | 0.0369  | 7.000    | 14.500   | 12.9093    | 15.1489   | Cof family protein                                        |                         |    |    |   |   |
|          |                        |                      |         |         | 4.500    | 14.500   | 9.4617     | 14.5000   |                                                           |                         |    |    |   |   |

- Show detected proteins only  
 Show all proteins

Proteins found:  
627

Filter by category:

ABC Transporter

Test

Cutoff

q-Value

.005

p-Value

|             | Signif | Direction | Applies To   |
|-------------|--------|-----------|--------------|
| Red         | yes    | +         | ratios, bars |
| Yellow      | no     | n/a       | bars         |
| Green       | yes    | -         | ratios, bars |
| Pink        | yes    | +         | p-, q-Values |
| Light Green | yes    | -         | p-, q-Values |

Dot Plots Dot Plots

Summary Table

SgFn vs Sg

SgPg vs Sg

SgPgFn vs Sg

SgPg vs SgFn

SgPgFn vs SgFn

SgPgFn vs SgPg

Coverage

SgPgFn vs SgPg

Raw

Normalized

Log<sub>2</sub> Ratios

| Protein  | SgPgFn vs SgPg         |                      |         |         | Raw    |         | Normalized |          | Description                                 | Log <sub>2</sub> Ratios |    |    |   |   |   |   |
|----------|------------------------|----------------------|---------|---------|--------|---------|------------|----------|---------------------------------------------|-------------------------|----|----|---|---|---|---|
|          | Log <sub>2</sub> Ratio | Log <sub>2</sub> Sum | q-Value | p-Value | SgPgFn | SgPg    | SgPgFn     | SgPg     |                                             | -6                      | -4 | -2 | 0 | 2 | 4 | 6 |
| SGO_0787 | -0.680                 | 6.644                | 0.0078  | 0.0056  | 9.000  | 29.500  | 16.5976    | 30.8202  | ftsY; cell division protein FtsY            |                         |    |    |   |   |   |   |
|          |                        |                      |         |         | 10.500 | 30.500  | 22.0772    | 30.5000  |                                             |                         |    |    |   |   |   |   |
| SGO_0788 | -0.083                 | 7.373                | 0.0165  | 0.0200  | 22.000 | 40.000  | 40.5720    | 41.7901  | zwf; glucose-6-phosphate 1-dehydrogenase    |                         |    |    |   |   |   |   |
|          |                        |                      |         |         | 19.000 | 43.500  | 39.9493    | 43.5000  |                                             |                         |    |    |   |   |   |   |
| SGO_0792 | 0.213                  | 6.515                | 0.0667  | 0.1684  | 14.000 | 23.000  | 25.8185    | 24.0293  | hypothetical protein SGO_0792               |                         |    |    |   |   |   |   |
|          |                        |                      |         |         | 11.000 | 18.500  | 23.1285    | 18.5000  |                                             |                         |    |    |   |   |   |   |
| SGO_0794 | -0.543                 | 7.003                | 0.0048  | 0.0017  | 13.500 | 35.000  | 24.8964    | 36.5663  | metallo-beta-lactamase family protein       |                         |    |    |   |   |   |   |
|          |                        |                      |         |         | 13.000 | 39.500  | 27.3337    | 39.5000  |                                             |                         |    |    |   |   |   |   |
| SGO_0795 | -0.846                 | 4.916                | 0.0016  | 0.0002  | 3.000  | 9.000   | 5.5325     | 9.4028   | tributylin esterase                         |                         |    |    |   |   |   |   |
|          |                        |                      |         |         | 2.500  | 10.000  | 5.2565     | 10.0000  |                                             |                         |    |    |   |   |   |   |
| SGO_0798 | -0.090                 | 6.447                | 0.0451  | 0.0973  | 11.500 | 22.500  | 21.2081    | 23.5069  | ABC transporter, ATP-binding protein SP1381 |                         |    |    |   |   |   |   |
|          |                        |                      |         |         | 10.000 | 21.500  | 21.0259    | 21.5000  |                                             |                         |    |    |   |   |   |   |
| SGO_0800 | -0.289                 | 4.477                | 0.0893  | 0.2470  | 3.500  | 7.000   | 6.4546     | 7.3133   | polysaccharide deacetylase family protein   |                         |    |    |   |   |   |   |
|          |                        |                      |         |         |        | 8.500   |            | 8.5000   |                                             |                         |    |    |   |   |   |   |
| SGO_0801 | -0.444                 | 8.709                | 0.0357  | 0.0679  | 58.500 | 111.500 | 107.8845   | 116.4899 | hom; homoserine dehydrogenase               |                         |    |    |   |   |   |   |
|          |                        |                      |         |         | 34.000 | 122.500 | 71.4882    | 122.5000 |                                             |                         |    |    |   |   |   |   |
| SGO_0802 | -0.990                 | 6.198                | 0.0056  | 0.0030  | 5.500  | 23.000  | 10.1430    | 24.0293  | thrB; homoserine kinase                     |                         |    |    |   |   |   |   |
|          |                        |                      |         |         | 7.000  | 24.500  | 14.7182    | 24.5000  |                                             |                         |    |    |   |   |   |   |
| SGO_0803 | -0.985                 | 5.780                | 0.0183  | 0.0238  | 7.000  | 16.500  | 12.9093    | 17.2384  | hypothetical protein SGO_0803               |                         |    |    |   |   |   |   |
|          |                        |                      |         |         | 3.000  | 18.500  | 6.3078     | 18.5000  |                                             |                         |    |    |   |   |   |   |
| SGO_0814 | -0.439                 | 3.119                |         |         | 2.000  |         | 3.6884     |          | aminotransferase, class-V                   |                         |    |    |   |   |   |   |
|          |                        |                      |         |         |        | 5.000   |            | 5.0000   |                                             |                         |    |    |   |   |   |   |
| SGO_0815 | -0.436                 | 6.739                | 0.0128  | 0.0137  | 11.500 | 31.500  | 21.2081    | 32.9097  | thiI; thiamine biosynthesis protein ThiI    |                         |    |    |   |   |   |   |
|          |                        |                      |         |         | 11.500 | 28.500  | 24.1798    | 28.5000  |                                             |                         |    |    |   |   |   |   |

- Show detected proteins only  
 Show all proteins

Proteins found:  
627

Filter by category:

ABC Transporter

Test

Cutoff

q-Value

.005

p-Value

|             | Signif | Direction | Applies To   |
|-------------|--------|-----------|--------------|
| Red         | yes    | +         | ratios, bars |
| Yellow      | no     | n/a       | bars         |
| Green       | yes    | -         | ratios, bars |
| Pink        | yes    | +         | p-, q-Values |
| Light Green | yes    | -         | p-, q-Values |

Dot Plots Dot Plots

Summary Table

SgFn vs Sg

SgPg vs Sg

SgPgFn vs Sg

SgPg vs SgFn

SgPgFn vs SgFn

SgPgFn vs SgPg

Coverage

SgPgFn vs SgPg

Raw

Normalized

Log<sub>2</sub> Ratios

| Protein  | SgPgFn vs SgPg         |                      |         |         | Raw     |         | Normalized |          | Description                                       | Log <sub>2</sub> Ratios |    |    |   |   |   |
|----------|------------------------|----------------------|---------|---------|---------|---------|------------|----------|---------------------------------------------------|-------------------------|----|----|---|---|---|
|          | Log <sub>2</sub> Ratio | Log <sub>2</sub> Sum | q-Value | p-Value | SgPgFn  | SgPg    | SgPgFn     | SgPg     |                                                   | -6                      | -4 | -2 | 0 | 2 | 4 |
| SGO_0818 | 0.146                  | 9.821                | 0.0805  | 0.2119  | 118.000 | 190.500 | 217.6132   | 199.0253 | rplU; ribosomal protein L21                       |                         |    |    |   |   |   |
|          |                        |                      |         |         | 122.500 | 230.000 | 257.5677   | 230.0000 |                                                   |                         |    |    |   |   |   |
| SGO_0820 | 0.049                  | 7.356                | 0.1989  | 0.7149  | 28.000  | 35.000  | 51.6370    | 36.5663  | rpmA; ribosomal protein L27                       |                         |    |    |   |   |   |
|          |                        |                      |         |         | 15.500  | 43.000  | 32.5902    | 43.0000  |                                                   |                         |    |    |   |   |   |
| SGO_0824 | -0.527                 | 7.513                | 0.0019  | 0.0003  | 19.500  | 51.500  | 35.9615    | 53.8047  | lepA; GTP-binding protein LepA                    |                         |    |    |   |   |   |
|          |                        |                      |         |         | 18.500  | 54.000  | 38.8980    | 54.0000  |                                                   |                         |    |    |   |   |   |
| SGO_0832 | -0.202                 | 4.135                | 0.1685  | 0.5790  |         | 7.000   |            | 7.3133   | hypothetical protein SGO_0832                     |                         |    |    |   |   |   |
|          |                        |                      |         |         | 2.500   | 5.000   | 5.2565     | 5.0000   |                                                   |                         |    |    |   |   |   |
| SGO_0835 | -0.100                 | 8.008                | 0.1676  | 0.5747  | 28.500  | 63.500  | 52.5591    | 66.3418  | nitroreductase                                    |                         |    |    |   |   |   |
|          |                        |                      |         |         | 34.500  | 66.000  | 72.5395    | 66.0000  |                                                   |                         |    |    |   |   |   |
| SGO_0836 | -0.322                 | 8.917                | 0.0227  | 0.0344  | 65.000  | 130.000 | 119.8717   | 135.8178 | pepV; dipeptidase PepV                            |                         |    |    |   |   |   |
|          |                        |                      |         |         | 45.500  | 132.000 | 95.6680    | 132.0000 |                                                   |                         |    |    |   |   |   |
| SGO_0842 | 0.314                  | 4.316                | 0.1271  | 0.3929  | 3.000   | 3.000   | 5.5325     | 3.1343   | rhodanese family protein                          |                         |    |    |   |   |   |
|          |                        |                      |         |         | 2.500   | 6.000   | 5.2565     | 6.0000   |                                                   |                         |    |    |   |   |   |
| SGO_0848 | 0.126                  | 8.471                | 0.0199  | 0.0280  | 52.000  | 82.000  | 95.8974    | 85.6697  | rpmE; ribosomal protein L31                       |                         |    |    |   |   |   |
|          |                        |                      |         |         | 42.500  | 84.000  | 89.3602    | 84.0000  |                                                   |                         |    |    |   |   |   |
| SGO_0850 | 0.821                  | 8.115                | 0.0532  | 0.1238  | 68.500  | 48.500  | 126.3263   | 50.6705  | flavodoxin                                        |                         |    |    |   |   |   |
|          |                        |                      |         |         | 26.500  | 44.500  | 55.7187    | 44.5000  |                                                   |                         |    |    |   |   |   |
| SGO_0854 | -0.083                 | 4.618                | 0.1668  | 0.5698  | 3.000   | 5.000   | 5.5325     | 5.2238   | cshA; surface-associated protein CshA             |                         |    |    |   |   |   |
|          |                        |                      |         |         | 3.000   | 7.500   | 6.3078     | 7.5000   |                                                   |                         |    |    |   |   |   |
| SGO_0856 | -0.843                 | 6.741                | 0.0099  | 0.0084  | 11.000  | 29.000  | 20.2860    | 30.2978  | ABC transporter, substrate binding protein        |                         |    |    |   |   |   |
|          |                        |                      |         |         | 8.500   | 38.500  | 17.8720    | 38.5000  |                                                   |                         |    |    |   |   |   |
| SGO_0859 | -0.591                 | 6.628                | 0.0101  | 0.0091  | 9.500   | 30.000  | 17.5197    | 31.3426  | pheS; phenylalanyl-tRNA synthetase, alpha subunit |                         |    |    |   |   |   |
|          |                        |                      |         |         | 10.500  | 28.000  | 22.0772    | 28.0000  |                                                   |                         |    |    |   |   |   |

- Show detected proteins only  
 Show all proteins

Proteins found:  
627

Filter by category:

ABC Transporter

Test

Cutoff

q-Value

.005

p-Value

|             | Signif | Direction | Applies To   |
|-------------|--------|-----------|--------------|
| Red         | yes    | +         | ratios, bars |
| Yellow      | no     | n/a       | bars         |
| Green       | yes    | -         | ratios, bars |
| Pink        | yes    | +         | p-, q-Values |
| Light Green | yes    | -         | p-, q-Values |

Dot Plots Dot Plots

Summary Table

SgFn vs Sg

SgPg vs Sg

SgPgFn vs Sg

SgPg vs SgFn

SgPgFn vs SgFn

SgPgFn vs SgPg

Coverage

SgPgFn vs SgPg

Raw

Normalized

Log<sub>2</sub> Ratios

| Protein  | SgPgFn vs SgPg         |                      |         |         | Raw    |         |          |          | Normalized                                       |      |        |      | Description | Log <sub>2</sub> Ratios |    |    |   |   |   |   |
|----------|------------------------|----------------------|---------|---------|--------|---------|----------|----------|--------------------------------------------------|------|--------|------|-------------|-------------------------|----|----|---|---|---|---|
|          | Log <sub>2</sub> Ratio | Log <sub>2</sub> Sum | q-Value | p-Value | SgPgFn | SgPg    | SgPgFn   | SgPg     | SgPgFn                                           | SgPg | SgPgFn | SgPg |             | -6                      | -4 | -2 | 0 | 2 | 4 | 6 |
| SGO_0861 | -0.016                 | 8.788                | 0.2193  | 0.8146  | 56.000 | 103.500 | 103.2741 | 108.1319 | pheT; phenylalanyl-tRNA synthetase, beta subunit |      |        |      |             |                         |    |    |   |   |   |   |
|          |                        |                      |         |         | 55.500 | 114.000 | 116.6939 | 114.0000 |                                                  |      |        |      |             |                         |    |    |   |   |   |   |
| SGO_0885 | 0.072                  | 4.529                | 0.1023  | 0.2951  | 3.000  | 5.500   | 5.5325   | 5.7461   | cobyric acid synthase                            |      |        |      |             |                         |    |    |   |   |   |   |
|          |                        |                      |         |         | 3.000  | 5.500   | 6.3078   | 5.5000   |                                                  |      |        |      |             |                         |    |    |   |   |   |   |
| SGO_0888 | -0.120                 | 3.360                | 0.2049  | 0.7437  |        | 2.500   |          | 2.6119   | hypothetical protein SGO_0888                    |      |        |      |             |                         |    |    |   |   |   |   |
|          |                        |                      |         |         | 1.500  | 4.500   | 3.1539   | 4.5000   |                                                  |      |        |      |             |                         |    |    |   |   |   |   |
| SGO_0889 | -0.857                 | 6.334                | 0.0094  | 0.0079  | 9.500  | 24.000  | 17.5197  | 25.0741  | glmM; phosphoglucosamine mutase                  |      |        |      |             |                         |    |    |   |   |   |   |
|          |                        |                      |         |         | 5.500  | 26.500  | 11.5643  | 26.5000  |                                                  |      |        |      |             |                         |    |    |   |   |   |   |
| SGO_0893 | -0.144                 | 7.478                | 0.0694  | 0.1766  | 23.000 | 40.500  | 42.4161  | 42.3125  | GTP-binding protein                              |      |        |      |             |                         |    |    |   |   |   |   |
|          |                        |                      |         |         | 20.000 | 51.500  | 42.0519  | 51.5000  |                                                  |      |        |      |             |                         |    |    |   |   |   |   |
| SGO_0901 | -1.239                 | 5.624                | 0.0092  | 0.0073  | 3.000  | 18.000  | 5.5325   | 18.8055  | DNA-directed DNA polymerase III                  |      |        |      |             |                         |    |    |   |   |   |   |
|          |                        |                      |         |         | 4.500  | 15.500  | 9.4617   | 15.5000  |                                                  |      |        |      |             |                         |    |    |   |   |   |   |
| SGO_0906 | -0.169                 | 7.067                | 0.1085  | 0.3157  | 14.500 | 34.000  | 26.7406  | 35.5216  | leuA; 2-isopropylmalate synthase                 |      |        |      |             |                         |    |    |   |   |   |   |
|          |                        |                      |         |         | 17.500 | 35.000  | 36.7954  | 35.0000  |                                                  |      |        |      |             |                         |    |    |   |   |   |   |
| SGO_0911 | -0.375                 | 8.145                | 0.0196  | 0.0271  | 29.500 | 75.000  | 54.4033  | 78.3564  | hypothetical protein SGO_0911                    |      |        |      |             |                         |    |    |   |   |   |   |
|          |                        |                      |         |         | 33.000 | 81.000  | 69.3856  | 81.0000  |                                                  |      |        |      |             |                         |    |    |   |   |   |   |
| SGO_0946 | -0.405                 | 5.997                | 0.0811  | 0.2141  | 5.500  | 19.000  | 10.1430  | 19.8503  | Deblocking aminopeptidase                        |      |        |      |             |                         |    |    |   |   |   |   |
|          |                        |                      |         |         | 8.500  | 16.000  | 17.8720  | 16.0000  |                                                  |      |        |      |             |                         |    |    |   |   |   |   |
| SGO_0949 | -0.280                 | 3.985                | 0.0869  | 0.2354  | 2.500  | 5.000   | 4.6104   | 5.2238   | deaD; DEAD RNA helicase                          |      |        |      |             |                         |    |    |   |   |   |   |
|          |                        |                      |         |         |        | 6.000   |          | 6.0000   |                                                  |      |        |      |             |                         |    |    |   |   |   |   |
| SGO_0950 | -0.499                 | 3.856                | 0.1382  | 0.4363  | 2.000  | 6.500   | 3.6884   | 6.7909   | oxidoreductase                                   |      |        |      |             |                         |    |    |   |   |   |   |
|          |                        |                      |         |         |        | 4.000   |          | 4.0000   |                                                  |      |        |      |             |                         |    |    |   |   |   |   |
| SGO_0951 | 0.056                  | 5.347                | 0.1726  | 0.5963  | 5.000  | 9.000   | 9.2209   | 9.4028   | udk; uridine kinase                              |      |        |      |             |                         |    |    |   |   |   |   |
|          |                        |                      |         |         | 5.500  | 10.500  | 11.5643  | 10.5000  |                                                  |      |        |      |             |                         |    |    |   |   |   |   |

- Show detected proteins only  
 Show all proteins

Proteins found:  
627

Filter by category:

ABC Transporter

Test

Cutoff

q-Value

.005

p-Value

|             | Signif | Direction | Applies To   |
|-------------|--------|-----------|--------------|
| Red         | yes    | +         | ratios, bars |
| Yellow      | no     | n/a       | bars         |
| Green       | yes    | -         | ratios, bars |
| Pink        | yes    | +         | p-, q-Values |
| Light Green | yes    | -         | p-, q-Values |

Dot Plots Dot Plots

Summary Table

SgFn vs Sg

SgPg vs Sg

SgPgFn vs Sg

SgPg vs SgFn

SgPgFn vs SgFn

SgPgFn vs SgPg

Coverage

SgPgFn vs SgPg

Raw

Normalized

Log<sub>2</sub> Ratios

| Protein  | SgPgFn vs SgPg         |                      |         |         | Raw    |         | Normalized |          | Description                                            | Log <sub>2</sub> Ratios |    |    |   |   |   |   |
|----------|------------------------|----------------------|---------|---------|--------|---------|------------|----------|--------------------------------------------------------|-------------------------|----|----|---|---|---|---|
|          | Log <sub>2</sub> Ratio | Log <sub>2</sub> Sum | q-Value | p-Value | SgPgFn | SgPg    | SgPgFn     | SgPg     |                                                        | -6                      | -4 | -2 | 0 | 2 | 4 | 6 |
| SGO_0954 | 0.400                  | 6.031                | 0.1104  | 0.3269  | 7.500  | 9.500   | 13.8313    | 9.9251   | ATP-binding protein                                    |                         |    |    |   |   |   |   |
|          |                        |                      |         |         | 11.000 | 18.500  | 23.1285    | 18.5000  |                                                        |                         |    |    |   |   |   |   |
| SGO_0982 | -1.448                 | 5.968                | 0.0050  | 0.0022  | 4.500  | 19.500  | 8.2988     | 20.3727  | amino acid ABC transporter, amino acid-binding protein |                         |    |    |   |   |   |   |
|          |                        |                      |         |         | 4.000  | 25.500  | 8.4104     | 25.5000  |                                                        |                         |    |    |   |   |   |   |
| SGO_0987 | 0.146                  | 7.404                | 0.1271  | 0.3950  | 24.000 | 32.500  | 44.2603    | 33.9545  | metK; S-adenosylmethionine synthetase                  |                         |    |    |   |   |   |   |
|          |                        |                      |         |         | 21.000 | 47.000  | 44.1545    | 47.0000  |                                                        |                         |    |    |   |   |   |   |
| SGO_0993 | 0.298                  | 2.742                |         |         | 2.000  |         | 3.6884     |          | GTP-binding protein HflX                               |                         |    |    |   |   |   |   |
|          |                        |                      |         |         |        | 3.000   |            | 3.0000   |                                                        |                         |    |    |   |   |   |   |
| SGO_0995 | -0.910                 | 4.300                | 0.1485  | 0.4762  | 2.000  | 11.500  | 3.6884     | 12.0147  | metallo-beta-lactamase superfamily protein             |                         |    |    |   |   |   |   |
|          |                        |                      |         |         |        | 4.000   |            | 4.0000   |                                                        |                         |    |    |   |   |   |   |
| SGO_1001 | -0.363                 | 7.652                | 0.0482  | 0.1077  | 20.000 | 48.500  | 36.8836    | 50.6705  | apt; adenine phosphoribosyltransferase                 |                         |    |    |   |   |   |   |
|          |                        |                      |         |         | 24.500 | 62.000  | 51.5135    | 62.0000  |                                                        |                         |    |    |   |   |   |   |
| SGO_1005 | -0.311                 | 5.052                | 0.0394  | 0.0786  | 4.000  | 10.000  | 7.3767     | 10.4475  | Bcl-2 family protein                                   |                         |    |    |   |   |   |   |
|          |                        |                      |         |         | 3.500  | 8.000   | 7.3591     | 8.0000   |                                                        |                         |    |    |   |   |   |   |
| SGO_1009 | -0.352                 | 8.825                | 0.0358  | 0.0687  | 46.000 | 126.500 | 84.8323    | 132.1612 | rfbA-1; glucose-1-phosphate thymidyltransferase        |                         |    |    |   |   |   |   |
|          |                        |                      |         |         | 55.000 | 121.000 | 115.6426   | 121.0000 |                                                        |                         |    |    |   |   |   |   |
| SGO_1010 | -0.004                 | 7.284                | 0.2348  | 0.8913  | 21.500 | 42.500  | 39.6499    | 44.4020  | rmlC; dTDP-4-keto-6-deoxyglucose-3,5-epimerase         |                         |    |    |   |   |   |   |
|          |                        |                      |         |         | 18.000 | 34.000  | 37.8467    | 34.0000  |                                                        |                         |    |    |   |   |   |   |
| SGO_1011 | -0.510                 | 7.930                | 0.0092  | 0.0074  | 25.500 | 73.000  | 47.0266    | 76.2669  | rfbB-1; dTDP-glucose 4,6-dehydratase                   |                         |    |    |   |   |   |   |
|          |                        |                      |         |         | 25.500 | 67.000  | 53.6161    | 67.0000  |                                                        |                         |    |    |   |   |   |   |
| SGO_1012 | -0.408                 | 8.489                | 0.0012  | 0.0001  | 41.000 | 98.500  | 75.6114    | 102.9081 | galE-1; UDP-glucose 4-epimerase                        |                         |    |    |   |   |   |   |
|          |                        |                      |         |         | 37.500 | 102.000 | 78.8473    | 102.0000 |                                                        |                         |    |    |   |   |   |   |
| SGO_1013 | 1.757                  | 3.716                |         |         | 5.500  |         | 10.1430    |          | Glycosyltransferase involved in cell wall biogenesis   |                         |    |    |   |   |   |   |
|          |                        |                      |         |         |        | 3.000   |            | 3.0000   |                                                        |                         |    |    |   |   |   |   |

- Show detected proteins only  
 Show all proteins

Proteins found:  
627

Filter by category:

ABC Transporter

Test

Cutoff

q-Value

.005

p-Value

|             | Signif | Direction | Applies To   |
|-------------|--------|-----------|--------------|
| Red         | yes    | +         | ratios, bars |
| Yellow      | no     | n/a       | bars         |
| Green       | yes    | -         | ratios, bars |
| Pink        | yes    | +         | p-, q-Values |
| Light Green | yes    | -         | p-, q-Values |

Dot Plots Dot Plots

Summary Table

SgFn vs Sg

SgPg vs Sg

SgPgFn vs Sg

SgPg vs SgFn

SgPgFn vs SgFn

SgPgFn vs SgPg

Coverage

SgPgFn vs SgPg

Raw

Normalized

Log<sub>2</sub> Ratios

| Protein  | SgPgFn vs SgPg         |                      |         |         | Raw     |         | Normalized |          | Description                                            | Log <sub>2</sub> Ratios |    |    |   |   |
|----------|------------------------|----------------------|---------|---------|---------|---------|------------|----------|--------------------------------------------------------|-------------------------|----|----|---|---|
|          | Log <sub>2</sub> Ratio | Log <sub>2</sub> Sum | q-Value | p-Value | SgPgFn  | SgPg    | SgPgFn     | SgPg     |                                                        | -6                      | -4 | -2 | 0 | 2 |
| SGO_1016 | -0.407                 | 4.079                | 0.0910  | 0.2534  | 2.500   | 6.500   | 4.6104     | 6.7909   | putative glycosyltransferase                           |                         |    |    |   |   |
|          |                        |                      |         |         |         | 5.500   |            | 5.5000   |                                                        |                         |    |    |   |   |
| SGO_1019 | -0.856                 | 3.694                | 0.0874  | 0.2378  | 1.500   | 4.000   | 2.7663     | 4.1790   | glycosyl transferase                                   |                         |    |    |   |   |
|          |                        |                      |         |         |         | 6.000   |            | 6.0000   |                                                        |                         |    |    |   |   |
| SGO_1020 | -0.143                 | 7.350                | 0.1361  | 0.4272  | 23.000  | 34.000  | 42.4161    | 35.5216  | rfbD; dTDP-4-dehydrorhamnose reductase                 |                         |    |    |   |   |
|          |                        |                      |         |         | 16.500  | 50.500  | 34.6928    | 50.5000  |                                                        |                         |    |    |   |   |
| SGO_1025 | -0.558                 | 5.938                | 0.0438  | 0.0934  | 8.500   | 15.000  | 15.6755    | 15.6713  | rgp; glycosyltransferase                               |                         |    |    |   |   |
|          |                        |                      |         |         | 4.500   | 20.500  | 9.4617     | 20.5000  |                                                        |                         |    |    |   |   |
| SGO_1026 | -1.030                 | 5.584                | 0.0017  | 0.0002  | 4.000   | 15.000  | 7.3767     | 15.6713  | rhamnosyltransferase                                   |                         |    |    |   |   |
|          |                        |                      |         |         | 4.000   | 16.500  | 8.4104     | 16.5000  |                                                        |                         |    |    |   |   |
| SGO_1031 | -0.922                 | 4.825                | 0.0158  | 0.0184  | 2.000   | 8.000   | 3.6884     | 8.3580   | cmk; cytidylate kinase                                 |                         |    |    |   |   |
|          |                        |                      |         |         | 3.000   | 10.000  | 6.3078     | 10.0000  |                                                        |                         |    |    |   |   |
| SGO_1032 | -0.215                 | 4.744                | 0.1382  | 0.4357  | 3.000   | 10.000  | 5.5325     | 10.4475  | infC; translation initiation factor IF-3               |                         |    |    |   |   |
|          |                        |                      |         |         | 3.000   | 4.500   | 6.3078     | 4.5000   |                                                        |                         |    |    |   |   |
| SGO_1034 | -0.702                 | 9.592                | 0.0321  | 0.0574  | 108.000 | 222.000 | 199.1714   | 231.9350 | rplT; ribosomal protein L20                            |                         |    |    |   |   |
|          |                        |                      |         |         | 49.500  | 236.500 | 104.0784   | 236.5000 |                                                        |                         |    |    |   |   |
| SGO_1035 | -0.089                 | 5.418                | 0.1403  | 0.4457  | 5.000   | 10.500  | 9.2209     | 10.9699  | gloA; lactoylglutathione lyase                         |                         |    |    |   |   |
|          |                        |                      |         |         | 5.500   | 11.000  | 11.5643    | 11.0000  |                                                        |                         |    |    |   |   |
| SGO_1036 | -1.118                 | 5.294                | 0.0358  | 0.0685  | 3.000   | 8.500   | 5.5325     | 8.8804   | amino acid ABC transporter, ATP-binding protein SP1242 |                         |    |    |   |   |
|          |                        |                      |         |         | 3.000   | 18.500  | 6.3078     | 18.5000  |                                                        |                         |    |    |   |   |
| SGO_1038 | 0.018                  | 4.993                | 0.2552  | 0.9977  | 3.500   | 9.500   | 6.4546     | 9.9251   | uvrB; excinuclease ABC, B subunit                      |                         |    |    |   |   |
|          |                        |                      |         |         | 4.500   | 6.000   | 9.4617     | 6.0000   |                                                        |                         |    |    |   |   |
| SGO_1047 | -1.205                 | 5.745                | 0.0107  | 0.0100  | 5.500   | 15.500  | 10.1430    | 16.1937  | hypothetical protein SGO_1047                          |                         |    |    |   |   |
|          |                        |                      |         |         | 3.000   | 21.000  | 6.3078     | 21.0000  |                                                        |                         |    |    |   |   |

- Show detected proteins only  
 Show all proteins

Proteins found:  
627

Filter by category:

ABC Transporter

Test

Cutoff

q-Value

.005

p-Value

|             | Signif | Direction | Applies To   |
|-------------|--------|-----------|--------------|
| Red         | yes    | +         | ratios, bars |
| Yellow      | no     | n/a       | bars         |
| Green       | yes    | -         | ratios, bars |
| Pink        | yes    | +         | p-, q-Values |
| Light Green | yes    | -         | p-, q-Values |

Dot Plots Dot Plots



Summary Table

SgFn vs Sg

SgPg vs Sg

SgPgFn vs Sg

SgPg vs SgFn

SgPgFn vs SgFn

SgPgFn vs SgPg

Coverage

| Protein  | SgPgFn vs SgPg         |                      |         |         | Raw     |          | Normalized |           | Description                                                                                                             | Log <sub>2</sub> Ratios |    |    |   |   |
|----------|------------------------|----------------------|---------|---------|---------|----------|------------|-----------|-------------------------------------------------------------------------------------------------------------------------|-------------------------|----|----|---|---|
|          | Log <sub>2</sub> Ratio | Log <sub>2</sub> Sum | q-Value | p-Value | SgPgFn  | SgPg     | SgPgFn     | SgPg      |                                                                                                                         | -6                      | -4 | -2 | 0 | 2 |
| SGO_1049 | -1.108                 | 4.615                | 0.0348  | 0.0652  | 2.500   | 9.000    | 4.6104     | 9.4028    | tRNA pseudouridine synthase B                                                                                           |                         |    |    |   |   |
|          |                        |                      |         |         |         | 10.500   |            | 10.5000   |                                                                                                                         |                         |    |    |   |   |
| SGO_1050 | -0.267                 | 3.894                | 0.1782  | 0.6234  |         | 3.500    |            | 3.6566    | ribF; riboflavin biosynthesis protein RibF                                                                              |                         |    |    |   |   |
|          |                        |                      |         |         | 2.000   | 7.000    | 4.2052     | 7.0000    |                                                                                                                         |                         |    |    |   |   |
| SGO_1051 | -1.595                 | 3.476                |         |         | 1.500   | 8.000    | 2.7663     | 8.3580    | negative regulator of proteolysis                                                                                       |                         |    |    |   |   |
|          |                        |                      |         |         |         |          |            |           |                                                                                                                         |                         |    |    |   |   |
| SGO_1058 | 1.220                  | 5.099                | 0.0073  | 0.0050  | 10.000  | 7.500    | 18.4418    | 7.8356    | pstB; Phosphate import ATP-binding protein<br>pstB 2 (Phosphate-transporting ATPase 2)<br>(ABC phosphate transporter 2) |                         |    |    |   |   |
|          |                        |                      |         |         |         | 8.000    |            | 8.0000    |                                                                                                                         |                         |    |    |   |   |
| SGO_1059 | 0.304                  | 6.760                | 0.0048  | 0.0016  | 16.500  | 22.500   | 30.4290    | 23.5069   | pstB; Phosphate import ATP-binding protein<br>pstB 1 (Phosphate-transporting ATPase 1)<br>(ABC phosphate transporter 1) |                         |    |    |   |   |
|          |                        |                      |         |         | 14.000  | 25.000   | 29.4363    | 25.0000   |                                                                                                                         |                         |    |    |   |   |
| SGO_1060 | -1.042                 | 6.723                | 0.0043  | 0.0012  | 9.000   | 36.500   | 16.5976    | 38.1335   | phosphate transport system regulatory protein                                                                           |                         |    |    |   |   |
|          |                        |                      |         |         | 8.500   | 33.000   | 17.8720    | 33.0000   |                                                                                                                         |                         |    |    |   |   |
| SGO_1065 | -0.056                 | 5.401                | 0.1849  | 0.6538  | 5.000   | 10.500   | 9.2209     | 10.9699   | hypothetical protein SGO_1065                                                                                           |                         |    |    |   |   |
|          |                        |                      |         |         | 5.500   | 10.500   | 11.5643    | 10.5000   |                                                                                                                         |                         |    |    |   |   |
| SGO_1069 | -0.344                 | 8.334                | 0.0248  | 0.0395  | 36.500  | 95.000   | 67.3126    | 99.2515   | membrane alanyl aminopeptidase                                                                                          |                         |    |    |   |   |
|          |                        |                      |         |         | 35.500  | 81.500   | 74.6421    | 81.5000   |                                                                                                                         |                         |    |    |   |   |
| SGO_1079 | -0.816                 | 6.258                | 0.0107  | 0.0101  | 7.000   | 20.500   | 12.9093    | 21.4174   | pdp; pyrimidine-nucleoside phosphorylase                                                                                |                         |    |    |   |   |
|          |                        |                      |         |         | 7.000   | 27.500   | 14.7182    | 27.5000   |                                                                                                                         |                         |    |    |   |   |
| SGO_1080 | -0.354                 | 7.838                | 0.0064  | 0.0039  | 26.500  | 64.000   | 48.8708    | 66.8642   | deoC; deoxyribose-phosphate aldolase                                                                                    |                         |    |    |   |   |
|          |                        |                      |         |         | 24.500  | 61.500   | 51.5135    | 61.5000   |                                                                                                                         |                         |    |    |   |   |
| SGO_1081 | 1.033                  | 3.484                | 0.0735  | 0.1892  | 3.000   | 3.500    | 5.5325     | 3.6566    | cdd; cytidine deaminase                                                                                                 |                         |    |    |   |   |
|          |                        |                      |         |         |         | 2.000    |            | 2.0000    |                                                                                                                         |                         |    |    |   |   |
| SGO_1082 | -0.212                 | 12.037               | 0.1609  | 0.5401  | 690.500 | 1026.000 | 1273.4063  | 1071.9160 | lipoprotein                                                                                                             |                         |    |    |   |   |
|          |                        |                      |         |         | 340.500 | 1141.000 | 715.9331   | 1141.0000 |                                                                                                                         |                         |    |    |   |   |

Show detected proteins only  
 Show all proteins  
 Filter by category:

Proteins found: 627

**Test**      **Cutoff**  
     

| Signif | Direction | Applies To   |
|--------|-----------|--------------|
| yes    | +         | ratios, bars |
| no     | n/a       | bars         |
| yes    | -         | ratios, bars |
| yes    | +         | p-, q-Values |
| yes    | -         | p-, q-Values |

Dot Plots    Dot Plots

Summary Table

SgFn vs Sg

SgPg vs Sg

SgPgFn vs Sg

SgPg vs SgFn

SgPgFn vs SgFn

SgPgFn vs SgPg

Coverage

SgPgFn vs SgPg

Raw

Normalized

Log<sub>2</sub> Ratios

| Protein  | SgPgFn vs SgPg         |                      |         |         | Raw     |         | Normalized |          | Description                                          | Log <sub>2</sub> Ratios |    |    |   |   |   |   |
|----------|------------------------|----------------------|---------|---------|---------|---------|------------|----------|------------------------------------------------------|-------------------------|----|----|---|---|---|---|
|          | Log <sub>2</sub> Ratio | Log <sub>2</sub> Sum | q-Value | p-Value | SgPgFn  | SgPg    | SgPgFn     | SgPg     |                                                      | -6                      | -4 | -2 | 0 | 2 | 4 | 6 |
| SGO_1083 | -0.634                 | 8.825                | 0.0148  | 0.0168  | 48.000  | 149.500 | 88.5206    | 156.1905 | sugar ABC transporter, ATP-binding protein SP0846    |                         |    |    |   |   |   |   |
|          |                        |                      |         |         | 42.000  | 120.500 | 88.3089    | 120.5000 |                                                      |                         |    |    |   |   |   |   |
| SGO_1088 | -0.517                 | 3.458                | 0.1390  | 0.4396  | 1.500   | 5.000   | 2.7663     | 5.2238   | transcription regulator, LysR family                 |                         |    |    |   |   |   |   |
|          |                        |                      |         |         |         | 3.000   |            | 3.0000   |                                                      |                         |    |    |   |   |   |   |
| SGO_1096 | -0.546                 | 10.083               | 0.0167  | 0.0208  | 140.000 | 295.000 | 258.1852   | 308.2020 | butA; acetoin dehydrogenase                          |                         |    |    |   |   |   |   |
|          |                        |                      |         |         | 88.500  | 332.500 | 186.0795   | 332.5000 |                                                      |                         |    |    |   |   |   |   |
| SGO_1098 | -0.908                 | 5.326                | 0.0271  | 0.0453  | 4.000   | 9.500   | 7.3767     | 9.9251   | proA; gamma-glutamyl phosphate reductase             |                         |    |    |   |   |   |   |
|          |                        |                      |         |         | 3.000   | 16.500  | 6.3078     | 16.5000  |                                                      |                         |    |    |   |   |   |   |
| SGO_1107 | -0.387                 | 3.279                |         |         |         |         |            |          | PyrR bifunctional protein                            |                         |    |    |   |   |   |   |
|          |                        |                      |         |         | 2.000   | 5.500   | 4.2052     | 5.5000   |                                                      |                         |    |    |   |   |   |   |
| SGO_1109 | -0.468                 | 7.446                | 0.0077  | 0.0055  | 21.500  | 47.000  | 39.6499    | 49.1034  | pyrB; aspartate carbamoyltransferase                 |                         |    |    |   |   |   |   |
|          |                        |                      |         |         | 16.000  | 52.000  | 33.6415    | 52.0000  |                                                      |                         |    |    |   |   |   |   |
| SGO_1111 | -0.999                 | 4.208                | 0.0466  | 0.1029  | 2.000   | 6.500   | 3.6884     | 6.7909   | fruR; phosphotransferase system repressor            |                         |    |    |   |   |   |   |
|          |                        |                      |         |         |         | 8.000   |            | 8.0000   |                                                      |                         |    |    |   |   |   |   |
| SGO_1112 | -1.620                 | 4.938                | 0.0735  | 0.1901  |         | 10.000  |            | 10.4475  | fruB; 1-phosphofructokinase                          |                         |    |    |   |   |   |   |
|          |                        |                      |         |         | 2.000   | 16.000  | 4.2052     | 16.0000  |                                                      |                         |    |    |   |   |   |   |
| SGO_1113 | 0.070                  | 7.700                | 0.2139  | 0.7865  | 26.000  | 58.000  | 47.9487    | 60.5956  | fruA; PTS system, fructose specific IIABC components |                         |    |    |   |   |   |   |
|          |                        |                      |         |         | 27.500  | 41.500  | 57.8213    | 41.5000  |                                                      |                         |    |    |   |   |   |   |
| SGO_1114 | -1.101                 | 5.443                | 0.0051  | 0.0023  | 3.500   | 15.500  | 6.4546     | 16.1937  | Protein of unknown function (DUF1149) superfamily    |                         |    |    |   |   |   |   |
|          |                        |                      |         |         | 3.500   | 13.500  | 7.3591     | 13.5000  |                                                      |                         |    |    |   |   |   |   |
| SGO_1116 | -0.461                 | 7.063                | 0.0163  | 0.0196  | 13.500  | 39.000  | 24.8964    | 40.7453  | dapB; dihydrodipicolinate reductase                  |                         |    |    |   |   |   |   |
|          |                        |                      |         |         | 15.000  | 36.500  | 31.5389    | 36.5000  |                                                      |                         |    |    |   |   |   |   |
| SGO_1120 | -0.352                 | 8.177                | 0.0319  | 0.0570  | 29.500  | 78.000  | 54.4033    | 81.4907  | guaA; GMP synthase                                   |                         |    |    |   |   |   |   |
|          |                        |                      |         |         | 35.000  | 80.000  | 73.5908    | 80.0000  |                                                      |                         |    |    |   |   |   |   |

- Show detected proteins only  
 Show all proteins

Proteins found:  
627

Filter by category:

ABC Transporter

Test

Cutoff

q-Value

.005

p-Value

|             | Signif | Direction | Applies To   |
|-------------|--------|-----------|--------------|
| Red         | yes    | +         | ratios, bars |
| Yellow      | no     | n/a       | bars         |
| Green       | yes    | -         | ratios, bars |
| Pink        | yes    | +         | p-, q-Values |
| Light Green | yes    | -         | p-, q-Values |

Dot Plots Dot Plots

Summary Table

SgFn vs Sg

SgPg vs Sg

SgPgFn vs Sg

SgPg vs SgFn

SgPgFn vs SgFn

SgPgFn vs SgPg

Coverage

SgPgFn vs SgPg

Raw

Normalized

Log<sub>2</sub> Ratios

| Protein  | SgPgFn vs SgPg         |                      |         |         | Raw    |         | Normalized |          | Description                                                | Log <sub>2</sub> Ratios |    |    |   |   |
|----------|------------------------|----------------------|---------|---------|--------|---------|------------|----------|------------------------------------------------------------|-------------------------|----|----|---|---|
|          | Log <sub>2</sub> Ratio | Log <sub>2</sub> Sum | q-Value | p-Value | SgPgFn | SgPg    | SgPgFn     | SgPg     |                                                            | -6                      | -4 | -2 | 0 | 2 |
| SGO_1123 | -0.243                 | 7.834                | 0.0198  | 0.0276  | 26.500 | 57.000  | 48.8708    | 59.5509  | ffh; signal recognition particle protein                   |                         |    |    |   |   |
|          |                        |                      |         |         | 26.500 | 64.000  | 55.7187    | 64.0000  |                                                            |                         |    |    |   |   |
| SGO_1129 | 0.133                  | 5.556                | 0.1407  | 0.4477  | 7.000  | 12.500  | 12.9093    | 13.0594  | lplA; lipoate protein ligase A                             |                         |    |    |   |   |
|          |                        |                      |         |         | 5.500  | 9.500   | 11.5643    | 9.5000   |                                                            |                         |    |    |   |   |
| SGO_1130 | -0.293                 | 7.485                | 0.0045  | 0.0014  | 22.000 | 48.500  | 40.5720    | 50.6705  | dihydrolipoamide dehydrogenase                             |                         |    |    |   |   |
|          |                        |                      |         |         | 19.000 | 48.000  | 39.9493    | 48.0000  |                                                            |                         |    |    |   |   |
| SGO_1131 | -0.628                 | 6.083                | 0.0172  | 0.0217  | 6.000  | 21.000  | 11.0651    | 21.9398  | sucB; dihydrolipoamide S-acetyltransferase                 |                         |    |    |   |   |
|          |                        |                      |         |         | 7.500  | 19.000  | 15.7695    | 19.0000  |                                                            |                         |    |    |   |   |
| SGO_1132 | -1.277                 | 4.431                | 0.0092  | 0.0072  | 2.000  | 8.500   | 3.6884     | 8.8804   | acetoin dehydrogenase                                      |                         |    |    |   |   |
|          |                        |                      |         |         |        | 9.000   |            | 9.0000   |                                                            |                         |    |    |   |   |
| SGO_1133 | -0.401                 | 5.511                | 0.0753  | 0.1952  | 4.000  | 13.500  | 7.3767     | 14.1042  | acoA; acetoin dehydrogenase                                |                         |    |    |   |   |
|          |                        |                      |         |         | 6.000  | 11.500  | 12.6156    | 11.5000  |                                                            |                         |    |    |   |   |
| SGO_1134 | 0.687                  | 2.769                |         |         |        | 2.500   |            | 2.6119   | hypothetical protein SGO_1134                              |                         |    |    |   |   |
|          |                        |                      |         |         | 2.000  |         | 4.2052     |          |                                                            |                         |    |    |   |   |
| SGO_1139 | -0.687                 | 6.647                | 0.0017  | 0.0002  | 10.000 | 29.000  | 18.4418    | 30.2978  | GTP-binding protein                                        |                         |    |    |   |   |
|          |                        |                      |         |         | 9.500  | 31.500  | 19.9746    | 31.5000  |                                                            |                         |    |    |   |   |
| SGO_1140 | -0.548                 | 8.083                | 0.0007  | 0.0000  | 29.500 | 77.500  | 54.4033    | 80.9683  | clpX; ATP-dependent Clp protease, ATP-binding subunit ClpX |                         |    |    |   |   |
|          |                        |                      |         |         | 26.500 | 80.000  | 55.7187    | 80.0000  |                                                            |                         |    |    |   |   |
| SGO_1141 | -0.510                 | 4.166                | 0.1108  | 0.3287  | 2.500  | 7.500   | 4.6104     | 7.8356   | folA; dihydrofolate reductase                              |                         |    |    |   |   |
|          |                        |                      |         |         |        | 5.500   |            | 5.5000   |                                                            |                         |    |    |   |   |
| SGO_1143 | -0.469                 | 5.119                | 0.0256  | 0.0415  | 5.000  | 12.000  | 9.2209     | 12.5370  | thyA; thymidylate synthase                                 |                         |    |    |   |   |
|          |                        |                      |         |         |        | 13.000  |            | 13.0000  |                                                            |                         |    |    |   |   |
| SGO_1144 | -0.205                 | 9.487                | 0.0330  | 0.0604  | 98.500 | 184.000 | 181.6517   | 192.2344 | glcK; glucokinase                                          |                         |    |    |   |   |
|          |                        |                      |         |         | 72.500 | 191.500 | 152.4380   | 191.5000 |                                                            |                         |    |    |   |   |

- Show detected proteins only  
 Show all proteins

Proteins found:  
627

Filter by category:

ABC Transporter

Test

Cutoff

q-Value

.005

p-Value

|             | Signif | Direction | Applies To   |
|-------------|--------|-----------|--------------|
| Red         | yes    | +         | ratios, bars |
| Yellow      | no     | n/a       | bars         |
| Green       | yes    | -         | ratios, bars |
| Pink        | yes    | +         | p-, q-Values |
| Light Green | yes    | -         | p-, q-Values |

Dot Plots Dot Plots

Summary Table

SgFn vs Sg

SgPg vs Sg

SgPgFn vs Sg

SgPg vs SgFn

SgPgFn vs SgFn

SgPgFn vs SgPg

Coverage

SgPgFn vs SgPg

Raw

Normalized

Log<sub>2</sub> Ratios

| Protein  | SgPgFn vs SgPg         |                      |         |         | Raw     |         | Normalized |          | Description                               | Log <sub>2</sub> Ratios |    |    |   |   |   |
|----------|------------------------|----------------------|---------|---------|---------|---------|------------|----------|-------------------------------------------|-------------------------|----|----|---|---|---|
|          | Log <sub>2</sub> Ratio | Log <sub>2</sub> Sum | q-Value | p-Value | SgPgFn  | SgPg    | SgPgFn     | SgPg     |                                           | -6                      | -4 | -2 | 0 | 2 | 4 |
| SGO_1150 | -0.736                 | 4.996                | 0.0458  | 0.1000  |         | 12.500  |            | 13.0594  | hypothetical protein SGO_1150             |                         |    |    |   |   |   |
|          |                        |                      |         |         | 3.500   | 11.500  | 7.3591     | 11.5000  |                                           |                         |    |    |   |   |   |
| SGO_1151 | -0.112                 | 9.374                | 0.0151  | 0.0172  | 84.000  | 165.500 | 154.9111   | 172.9065 | glyA; serine hydroxymethyltransferase     |                         |    |    |   |   |   |
|          |                        |                      |         |         | 78.000  | 171.500 | 164.0023   | 171.5000 |                                           |                         |    |    |   |   |   |
| SGO_1154 | 0.176                  | 7.252                | 0.0328  | 0.0595  | 20.500  | 33.500  | 37.8057    | 34.9992  | prfA; peptide chain release factor 1      |                         |    |    |   |   |   |
|          |                        |                      |         |         | 20.500  | 36.500  | 43.1032    | 36.5000  |                                           |                         |    |    |   |   |   |
| SGO_1155 | -0.062                 | 5.189                | 0.2203  | 0.8197  |         | 9.000   |            | 9.4028   | tdk; thymidine kinase                     |                         |    |    |   |   |   |
|          |                        |                      |         |         | 5.500   | 15.500  | 11.5643    | 15.5000  |                                           |                         |    |    |   |   |   |
| SGO_1167 | -1.225                 | 7.832                | 0.0061  | 0.0037  | 14.000  | 76.000  | 25.8185    | 79.4012  | nox; NADH oxidase                         |                         |    |    |   |   |   |
|          |                        |                      |         |         | 21.000  | 78.500  | 44.1545    | 78.5000  |                                           |                         |    |    |   |   |   |
| SGO_1169 | -0.074                 | 7.287                | 0.1579  | 0.5196  | 20.500  | 44.000  | 37.8057    | 45.9691  | NADPH-dependent FMN reductase             |                         |    |    |   |   |   |
|          |                        |                      |         |         | 18.000  | 34.500  | 37.8467    | 34.5000  |                                           |                         |    |    |   |   |   |
| SGO_1170 | -0.164                 | 7.848                | 0.0268  | 0.0445  | 31.000  | 60.000  | 57.1696    | 62.6851  | NADPH-dependent FMN reductase             |                         |    |    |   |   |   |
|          |                        |                      |         |         | 24.500  | 59.000  | 51.5135    | 59.0000  |                                           |                         |    |    |   |   |   |
| SGO_1185 | -0.678                 | 4.825                | 0.0219  | 0.0318  | 2.500   | 9.500   | 4.6104     | 9.9251   | acetyltransferase, GNAT family            |                         |    |    |   |   |   |
|          |                        |                      |         |         | 3.000   | 7.500   | 6.3078     | 7.5000   |                                           |                         |    |    |   |   |   |
| SGO_1189 | 0.243                  | 6.125                | 0.1382  | 0.4349  | 15.000  | 12.500  | 27.6627    | 13.0594  | lipoprotein, putative                     |                         |    |    |   |   |   |
|          |                        |                      |         |         | 5.500   | 17.500  | 11.5643    | 17.5000  |                                           |                         |    |    |   |   |   |
| SGO_1191 | 0.592                  | 11.525               | 0.0050  | 0.0022  | 454.000 | 580.500 | 837.2577   | 606.4788 | rplL; ribosomal protein L7/L12            |                         |    |    |   |   |   |
|          |                        |                      |         |         | 444.500 | 568.000 | 934.6028   | 568.0000 |                                           |                         |    |    |   |   |   |
| SGO_1192 | -0.831                 | 9.141                | 0.0196  | 0.0270  | 56.500  | 141.000 | 104.1962   | 147.3101 | BL5; 50S ribosomal protein L10            |                         |    |    |   |   |   |
|          |                        |                      |         |         | 46.000  | 216.500 | 96.7193    | 216.5000 |                                           |                         |    |    |   |   |   |
| SGO_1193 | -1.780                 | 5.724                | 0.0061  | 0.0036  | 3.000   | 22.500  | 5.5325     | 23.5069  | gid; Glucose inhibited division protein A |                         |    |    |   |   |   |
|          |                        |                      |         |         | 3.000   | 17.500  | 6.3078     | 17.5000  |                                           |                         |    |    |   |   |   |

- Show detected proteins only  
 Show all proteins

Proteins found:  
627

Filter by category:

ABC Transporter

Test

Cutoff

q-Value

.005

p-Value

|             | Signif | Direction | Applies To   |
|-------------|--------|-----------|--------------|
| Red         | yes    | +         | ratios, bars |
| Yellow      | no     | n/a       | bars         |
| Green       | yes    | -         | ratios, bars |
| Pink        | yes    | +         | p-, q-Values |
| Light Green | yes    | -         | p-, q-Values |

Dot Plots Dot Plots

Summary Table

SgFn vs Sg

SgPg vs Sg

SgPgFn vs Sg

SgPg vs SgFn

SgPgFn vs SgFn

SgPgFn vs SgPg

Coverage

SgPgFn vs SgPg

Raw

Normalized

Log<sub>2</sub> Ratios

| Protein  | SgPgFn vs SgPg         |                      |         |         | Raw    |         | Normalized |          | Description                                           | Log <sub>2</sub> Ratios |    |    |   |   |
|----------|------------------------|----------------------|---------|---------|--------|---------|------------|----------|-------------------------------------------------------|-------------------------|----|----|---|---|
|          | Log <sub>2</sub> Ratio | Log <sub>2</sub> Sum | q-Value | p-Value | SgPgFn | SgPg    | SgPgFn     | SgPg     |                                                       | -6                      | -4 | -2 | 0 | 2 |
| SGO_1197 | -0.539                 | 6.562                | 0.0140  | 0.0154  | 10.000 | 24.000  | 18.4418    | 25.0741  | topA; DNA topoisomerase I                             |                         |    |    |   |   |
|          |                        |                      |         |         | 9.500  | 31.000  | 19.9746    | 31.0000  |                                                       |                         |    |    |   |   |
| SGO_1198 | 0.242                  | 8.232                | 0.0289  | 0.0498  | 48.000 | 66.500  | 88.5206    | 69.4760  | DNA processing Smf protein                            |                         |    |    |   |   |
|          |                        |                      |         |         | 35.500 | 68.000  | 74.6421    | 68.0000  |                                                       |                         |    |    |   |   |
| SGO_1203 | -0.311                 | 6.275                | 0.0295  | 0.0509  | 8.500  | 19.000  | 15.6755    | 19.8503  | anaerobic ribonucleotide reductase                    |                         |    |    |   |   |
|          |                        |                      |         |         | 9.000  | 23.000  | 18.9233    | 23.0000  |                                                       |                         |    |    |   |   |
| SGO_1205 | -0.173                 | 4.641                | 0.1033  | 0.2994  | 3.500  | 5.500   | 6.4546     | 5.7461   | dapA; dihydrodipicolinate synthase                    |                         |    |    |   |   |
|          |                        |                      |         |         | 2.500  | 7.500   | 5.2565     | 7.5000   |                                                       |                         |    |    |   |   |
| SGO_1206 | 0.517                  | 6.972                | 0.0053  | 0.0027  | 19.000 | 25.500  | 35.0394    | 26.6412  | asd; aspartate-semialdehyde dehydrogenase             |                         |    |    |   |   |
|          |                        |                      |         |         | 18.500 | 25.000  | 38.8980    | 25.0000  |                                                       |                         |    |    |   |   |
| SGO_1210 | -1.052                 | 4.625                | 0.1103  | 0.3245  | 2.500  | 12.500  | 4.6104     | 13.0594  | fhs-1; formate--tetrahydrofolate ligase               |                         |    |    |   |   |
|          |                        |                      |         |         |        | 7.000   |            | 7.0000   |                                                       |                         |    |    |   |   |
| SGO_1215 | -0.577                 | 9.730                | 0.0000  | 0.0000  | 92.500 | 243.000 | 170.5866   | 253.8748 | manB; phosphomannomutase                              |                         |    |    |   |   |
|          |                        |                      |         |         | 81.000 | 254.500 | 170.3101   | 254.5000 |                                                       |                         |    |    |   |   |
| SGO_1216 | -0.641                 | 7.060                | 0.0103  | 0.0094  | 14.500 | 43.000  | 26.7406    | 44.9244  | bta; Possible bacteriocin transport accessory protein |                         |    |    |   |   |
|          |                        |                      |         |         | 12.000 | 36.500  | 25.2311    | 36.5000  |                                                       |                         |    |    |   |   |
| SGO_1219 | -0.147                 | 7.143                | 0.0656  | 0.1621  | 16.500 | 36.000  | 30.4290    | 37.6111  | pta; phosphate acetyltransferase                      |                         |    |    |   |   |
|          |                        |                      |         |         | 17.500 | 36.500  | 36.7954    | 36.5000  |                                                       |                         |    |    |   |   |
| SGO_1224 | -0.222                 | 8.539                | 0.0384  | 0.0755  | 42.500 | 100.500 | 78.3776    | 104.9976 | Ribose-phosphate pyrophosphokinase 2                  |                         |    |    |   |   |
|          |                        |                      |         |         | 44.500 | 95.000  | 93.5654    | 95.0000  |                                                       |                         |    |    |   |   |
| SGO_1225 | -0.082                 | 5.027                | 0.1579  | 0.5157  | 4.000  | 7.000   | 7.3767     | 7.3133   | pyridoxal-phosphate dependent aminotransferase        |                         |    |    |   |   |
|          |                        |                      |         |         | 4.000  | 9.500   | 8.4104     | 9.5000   |                                                       |                         |    |    |   |   |
| SGO_1226 | -0.205                 | 6.039                | 0.0203  | 0.0288  | 8.000  | 16.000  | 14.7534    | 16.7160  | hypothetical protein SGO_1226                         |                         |    |    |   |   |
|          |                        |                      |         |         | 7.500  | 18.500  | 15.7695    | 18.5000  |                                                       |                         |    |    |   |   |

- Show detected proteins only  
 Show all proteins

Proteins found:  
627

Filter by category:

ABC Transporter

Test

Cutoff

q-Value

.005

p-Value

|             | Signif | Direction | Applies To   |
|-------------|--------|-----------|--------------|
| Red         | yes    | +         | ratios, bars |
| Yellow      | no     | n/a       | bars         |
| Green       | yes    | -         | ratios, bars |
| Pink        | yes    | +         | p-, q-Values |
| Light Green | yes    | -         | p-, q-Values |

Dot Plots Dot Plots

Summary Table

SgFn vs Sg

SgPg vs Sg

SgPgFn vs Sg

SgPg vs SgFn

SgPgFn vs SgFn

SgPgFn vs SgPg

Coverage

SgPgFn vs SgPg

Raw

Normalized

Log<sub>2</sub> Ratios

| Protein  | SgPgFn vs SgPg         |                      |         |         | Raw     |         | Normalized |          | Description                                                       | Log <sub>2</sub> Ratios |    |    |   |   |   |   |
|----------|------------------------|----------------------|---------|---------|---------|---------|------------|----------|-------------------------------------------------------------------|-------------------------|----|----|---|---|---|---|
|          | Log <sub>2</sub> Ratio | Log <sub>2</sub> Sum | q-Value | p-Value | SgPgFn  | SgPg    | SgPgFn     | SgPg     |                                                                   | -6                      | -4 | -2 | 0 | 2 | 4 | 6 |
| SGO_1231 | -0.544                 | 6.626                | 0.0495  | 0.1114  | 10.500  | 21.000  | 19.3639    | 21.9398  | gyrA; DNA gyrase, A subunit                                       |                         |    |    |   |   |   |   |
|          |                        |                      |         |         | 9.500   | 37.500  | 19.9746    | 37.5000  |                                                                   |                         |    |    |   |   |   |   |
| SGO_1232 | 0.085                  | 10.720               | 0.0113  | 0.0108  | 234.000 | 398.500 | 431.5381   | 416.3338 | L-lactate dehydrogenase                                           |                         |    |    |   |   |   |   |
|          |                        |                      |         |         | 207.500 | 402.000 | 436.2882   | 402.0000 |                                                                   |                         |    |    |   |   |   |   |
| SGO_1234 | 0.167                  | 10.658               | 0.0048  | 0.0016  | 228.500 | 368.500 | 421.3951   | 384.9913 | rpsA; 30S ribosomal protein S1                                    |                         |    |    |   |   |   |   |
|          |                        |                      |         |         | 206.000 | 376.000 | 433.1343   | 376.0000 |                                                                   |                         |    |    |   |   |   |   |
| SGO_1237 | 0.449                  | 6.187                | 0.0848  | 0.2281  | 7.500   | 13.500  | 13.8313    | 14.1042  | hypothetical protein SGO_1237                                     |                         |    |    |   |   |   |   |
|          |                        |                      |         |         | 14.000  | 15.500  | 29.4363    | 15.5000  |                                                                   |                         |    |    |   |   |   |   |
| SGO_1238 | -0.343                 | 6.447                | 0.0305  | 0.0530  | 9.000   | 23.500  | 16.5976    | 24.5517  | ilvE; branched-chain amino acid aminotransferase                  |                         |    |    |   |   |   |   |
|          |                        |                      |         |         | 10.500  | 24.000  | 22.0772    | 24.0000  |                                                                   |                         |    |    |   |   |   |   |
| SGO_1239 | -1.874                 | 4.994                | 0.0012  | 0.0001  | 2.000   | 11.500  | 3.6884     | 12.0147  | parC; DNA topoisomerase IV, A subunit                             |                         |    |    |   |   |   |   |
|          |                        |                      |         |         | 1.500   | 13.000  | 3.1539     | 13.0000  |                                                                   |                         |    |    |   |   |   |   |
| SGO_1242 | 0.352                  | 3.887                |         |         | 4.500   |         | 8.2988     |          | lipoprotein, putative                                             |                         |    |    |   |   |   |   |
|          |                        |                      |         |         |         | 6.500   |            | 6.5000   |                                                                   |                         |    |    |   |   |   |   |
| SGO_1248 | -1.332                 | 5.511                | 0.0136  | 0.0148  | 3.500   | 19.000  | 6.4546     | 19.8503  | pyrC; dihydroorotase                                              |                         |    |    |   |   |   |   |
|          |                        |                      |         |         | 3.000   | 13.000  | 6.3078     | 13.0000  |                                                                   |                         |    |    |   |   |   |   |
| SGO_1253 | -0.339                 | 6.446                | 0.0353  | 0.0668  | 9.000   | 22.000  | 16.5976    | 22.9846  | pyrE; orotate phosphoribosyltransferase                           |                         |    |    |   |   |   |   |
|          |                        |                      |         |         | 10.500  | 25.500  | 22.0772    | 25.5000  |                                                                   |                         |    |    |   |   |   |   |
| SGO_1260 | 0.001                  | 7.787                | 0.2478  | 0.9628  | 32.000  | 51.000  | 59.0138    | 53.2824  | deoD; purine nucleoside phosphorylase                             |                         |    |    |   |   |   |   |
|          |                        |                      |         |         | 24.500  | 57.000  | 51.5135    | 57.0000  |                                                                   |                         |    |    |   |   |   |   |
| SGO_1263 | -0.766                 | 8.178                | 0.0100  | 0.0088  | 24.000  | 84.000  | 44.2603    | 87.7592  | purine nucleoside phosphorylase I, inosine and guanosine-specific |                         |    |    |   |   |   |   |
|          |                        |                      |         |         | 30.500  | 93.500  | 64.1291    | 93.5000  |                                                                   |                         |    |    |   |   |   |   |
| SGO_1264 | -0.144                 | 9.434                | 0.1271  | 0.3944  | 75.500  | 177.500 | 139.2356   | 185.4436 | deoB; phosphopentomutase                                          |                         |    |    |   |   |   |   |
|          |                        |                      |         |         | 91.000  | 175.500 | 191.3360   | 175.5000 |                                                                   |                         |    |    |   |   |   |   |

 Show detected proteins only Show all proteinsProteins found:  
627 Filter by category:

ABC Transporter

Test

Cutoff

q-Value

p-Value

.005

|             | Signif | Direction | Applies To   |
|-------------|--------|-----------|--------------|
| Red         | yes    | +         | ratios, bars |
| Yellow      | no     | n/a       | bars         |
| Green       | yes    | -         | ratios, bars |
| Pink        | yes    | +         | p-, q-Values |
| Light Green | yes    | -         | p-, q-Values |

Dot Plots Dot Plots

Summary Table

SgFn vs Sg

SgPg vs Sg

SgPgFn vs Sg

SgPg vs SgFn

SgPgFn vs SgFn

SgPgFn vs SgPg

Coverage

SgPgFn vs SgPg

Raw

Normalized

Log<sub>2</sub> Ratios

| Protein  | SgPgFn vs SgPg         |                      |         |         | Raw    |        | Normalized |         | Description                         | Log <sub>2</sub> Ratios |    |    |   |   |
|----------|------------------------|----------------------|---------|---------|--------|--------|------------|---------|-------------------------------------|-------------------------|----|----|---|---|
|          | Log <sub>2</sub> Ratio | Log <sub>2</sub> Sum | q-Value | p-Value | SgPgFn | SgPg   | SgPgFn     | SgPg    |                                     | -6                      | -4 | -2 | 0 | 2 |
| SGO_1265 | -0.281                 | 7.570                | 0.0190  | 0.0257  | 21.500 | 48.000 | 39.6499    | 50.1481 | rpiA; ribose 5-phosphate isomerase  |                         |    |    |   |   |
|          |                        |                      |         |         | 22.000 | 54.000 | 46.2571    | 54.0000 |                                     |                         |    |    |   |   |
| SGO_1266 | -0.319                 | 5.932                | 0.0570  | 0.1353  | 8.500  | 18.000 | 15.6755    | 18.8055 | trmE; tRNA modification GTPase TrmE |                         |    |    |   |   |
|          |                        |                      |         |         | 5.500  | 15.000 | 11.5643    | 15.0000 |                                     |                         |    |    |   |   |
| SGO_1273 | 0.084                  | 8.669                | 0.1635  | 0.5535  | 68.500 | 93.000 | 126.3263   | 97.1620 | rpoD; RNA polymerase sigma factor   |                         |    |    |   |   |
|          |                        |                      |         |         | 40.500 | 98.500 | 85.1550    | 98.5000 |                                     |                         |    |    |   |   |
| SGO_1276 | 0.200                  | 7.602                | 0.0874  | 0.2374  | 24.500 | 39.000 | 45.1824    | 40.7453 | rpsU; ribosomal protein S21         |                         |    |    |   |   |
|          |                        |                      |         |         | 28.000 | 49.500 | 58.8726    | 49.5000 |                                     |                         |    |    |   |   |
| SGO_1281 | -1.109                 | 4.494                | 0.0665  | 0.1670  |        | 7.500  |            | 7.8356  | penicillinase repressor, putative   |                         |    |    |   |   |
|          |                        |                      |         |         | 2.000  | 10.500 | 4.2052     | 10.5000 |                                     |                         |    |    |   |   |
| SGO_1283 | -0.407                 | 8.123                | 0.0016  | 0.0002  | 32.500 | 77.500 | 59.9358    | 80.9683 | oxidoreductase                      |                         |    |    |   |   |
|          |                        |                      |         |         | 28.500 | 78.000 | 59.9239    | 78.0000 |                                     |                         |    |    |   |   |
| SGO_1284 | -0.029                 | 5.586                | 0.1982  | 0.7089  | 5.500  | 17.000 | 10.1430    | 17.7608 | thioredoxin-disulfide reductase     |                         |    |    |   |   |
|          |                        |                      |         |         | 6.000  | 7.500  | 12.6156    | 7.5000  |                                     |                         |    |    |   |   |
| SGO_1293 | -0.362                 | 7.357                | 0.0731  | 0.1879  | 15.000 | 46.500 | 27.6627    | 48.5810 | asnS; asparaginyl-tRNA synthetase   |                         |    |    |   |   |
|          |                        |                      |         |         | 21.500 | 42.500 | 45.2058    | 42.5000 |                                     |                         |    |    |   |   |
| SGO_1297 | 0.120                  | 6.240                | 0.0340  | 0.0635  | 10.500 | 16.500 | 19.3639    | 17.2384 | aspC; aspartate aminotransferase    |                         |    |    |   |   |
|          |                        |                      |         |         | 9.500  | 19.000 | 19.9746    | 19.0000 |                                     |                         |    |    |   |   |
| SGO_1305 | -0.947                 | 5.196                | 0.0053  | 0.0026  | 4.000  | 11.500 | 7.3767     | 12.0147 | substrate-binding protein MsmE      |                         |    |    |   |   |
|          |                        |                      |         |         | 2.500  | 12.000 | 5.2565     | 12.0000 |                                     |                         |    |    |   |   |
| SGO_1312 | -0.574                 | 7.684                | 0.0079  | 0.0057  | 25.000 | 60.000 | 46.1045    | 62.6851 | pepT; peptidase T                   |                         |    |    |   |   |
|          |                        |                      |         |         | 17.500 | 60.000 | 36.7954    | 60.0000 |                                     |                         |    |    |   |   |
| SGO_1323 | 0.733                  | 7.891                | 0.0043  | 0.0012  | 41.500 | 39.500 | 76.5335    | 41.2677 | rpsP; ribosomal protein S16         |                         |    |    |   |   |
|          |                        |                      |         |         | 34.000 | 48.000 | 71.4882    | 48.0000 |                                     |                         |    |    |   |   |

- Show detected proteins only  
 Show all proteins

Proteins found:  
627

Filter by category:

ABC Transporter

Test

Cutoff

q-Value

.005

p-Value

|             | Signif | Direction | Applies To   |
|-------------|--------|-----------|--------------|
| Red         | yes    | +         | ratios, bars |
| Yellow      | no     | n/a       | bars         |
| Green       | yes    | -         | ratios, bars |
| Pink        | yes    | +         | p-, q-Values |
| Light Green | yes    | -         | p-, q-Values |

Dot Plots Dot Plots

Summary Table

SgFn vs Sg

SgPg vs Sg

SgPgFn vs Sg

SgPg vs SgFn

SgPgFn vs SgFn

SgPgFn vs SgPg

Coverage

SgPgFn vs SgPg

Raw

Normalized

Log<sub>2</sub> Ratios

| Protein  | SgPgFn vs SgPg         |                      |         |         | Raw     |         |          |          | Normalized |         |          |          | Description                                         | Log <sub>2</sub> Ratios |    |    |   |   |   |   |
|----------|------------------------|----------------------|---------|---------|---------|---------|----------|----------|------------|---------|----------|----------|-----------------------------------------------------|-------------------------|----|----|---|---|---|---|
|          | Log <sub>2</sub> Ratio | Log <sub>2</sub> Sum | q-Value | p-Value | SgPgFn  | SgPg    | SgPgFn   | SgPg     | SgPgFn     | SgPg    | SgPgFn   | SgPg     |                                                     | -6                      | -4 | -2 | 0 | 2 | 4 | 6 |
| SGO_1327 | -0.917                 | 5.317                | 0.0026  | 0.0005  | 3.500   | 12.000  | 6.4546   | 12.5370  | 3.500      | 13.500  | 7.3591   | 13.5000  | HAD-superfamily subfamily IIA hydrolase, TIGR01457  |                         |    |    |   |   |   |   |
|          |                        |                      |         |         |         |         |          |          |            |         |          |          |                                                     |                         |    |    |   |   |   |   |
| SGO_1336 | -0.793                 | 5.338                | 0.0073  | 0.0051  | 3.500   | 13.000  | 6.4546   | 13.5818  | 4.000      | 12.000  | 8.4104   | 12.0000  | pcrA; ATP-dependent DNA helicase PcrA               |                         |    |    |   |   |   |   |
|          |                        |                      |         |         |         |         |          |          |            |         |          |          |                                                     |                         |    |    |   |   |   |   |
| SGO_1339 | -0.104                 | 11.699               | 0.0426  | 0.0899  | 454.000 | 803.500 | 837.2577 | 839.4586 | 364.500    | 882.500 | 766.3954 | 882.5000 | pyk; pyruvate kinase                                |                         |    |    |   |   |   |   |
|          |                        |                      |         |         |         |         |          |          |            |         |          |          |                                                     |                         |    |    |   |   |   |   |
| SGO_1340 | -0.128                 | 9.949                | 0.0114  | 0.0111  | 124.500 | 246.000 | 229.6004 | 257.0091 | 115.500    | 259.000 | 242.8496 | 259.0000 | Phosphofructokinase                                 |                         |    |    |   |   |   |   |
|          |                        |                      |         |         |         |         |          |          |            |         |          |          |                                                     |                         |    |    |   |   |   |   |
| SGO_1342 | 0.066                  | 9.004                | 0.1095  | 0.3209  | 71.000  | 128.000 | 130.9368 | 133.7283 | 62.500     | 117.500 | 131.4121 | 117.5000 | ABC transporter, ATP-binding protein SP1715         |                         |    |    |   |   |   |   |
|          |                        |                      |         |         |         |         |          |          |            |         |          |          |                                                     |                         |    |    |   |   |   |   |
| SGO_1364 | -2.148                 | 5.375                | 0.0143  | 0.0158  |         | 17.500  |          | 18.2832  | 2.000      | 19.000  | 4.2052   | 19.0000  | rumA-2; 23S rRNA (uracil-5-)-methyltransferase Ruma |                         |    |    |   |   |   |   |
|          |                        |                      |         |         |         |         |          |          |            |         |          |          |                                                     |                         |    |    |   |   |   |   |
| SGO_1365 | 0.541                  | 3.376                | 0.1526  | 0.4924  |         | 4.000   |          | 4.1790   | 2.000      | 2.000   | 4.2052   | 2.0000   | transcription regulator yrfE                        |                         |    |    |   |   |   |   |
|          |                        |                      |         |         |         |         |          |          |            |         |          |          |                                                     |                         |    |    |   |   |   |   |
| SGO_1369 | -0.910                 | 4.724                | 0.0565  | 0.1337  | 3.000   | 9.000   | 5.5325   | 9.4028   |            | 11.500  |          | 11.5000  | L-2-hydroxyisocaproate dehydrogenase                |                         |    |    |   |   |   |   |
|          |                        |                      |         |         |         |         |          |          |            |         |          |          |                                                     |                         |    |    |   |   |   |   |
| SGO_1370 | 0.392                  | 6.928                | 0.0178  | 0.0228  | 17.500  | 27.500  | 32.2731  | 28.7307  | 17.500     | 24.000  | 36.7954  | 24.0000  | Protein of unknown function (DUF964) superfamily    |                         |    |    |   |   |   |   |
|          |                        |                      |         |         |         |         |          |          |            |         |          |          |                                                     |                         |    |    |   |   |   |   |
| SGO_1372 | -0.629                 | 5.106                | 0.0352  | 0.0663  |         | 12.000  |          | 12.5370  | 4.000      | 13.500  | 8.4104   | 13.5000  | aroC; chorismate synthase                           |                         |    |    |   |   |   |   |
|          |                        |                      |         |         |         |         |          |          |            |         |          |          |                                                     |                         |    |    |   |   |   |   |
| SGO_1373 | -0.318                 | 4.272                | 0.0284  | 0.0487  | 3.000   | 6.500   | 5.5325   | 6.7909   |            | 7.000   |          | 7.0000   | aroB; 3-dehydroquinate synthase                     |                         |    |    |   |   |   |   |
|          |                        |                      |         |         |         |         |          |          |            |         |          |          |                                                     |                         |    |    |   |   |   |   |
| SGO_1375 | -0.556                 | 5.207                | 0.1164  | 0.3516  | 5.000   | 16.000  | 9.2209   | 16.7160  |            | 11.000  |          | 11.0000  | aroD; 3-dehydroquinate dehydratase, type I          |                         |    |    |   |   |   |   |
|          |                        |                      |         |         |         |         |          |          |            |         |          |          |                                                     |                         |    |    |   |   |   |   |

- Show detected proteins only  
 Show all proteins

Proteins found:  
627

Filter by category:

ABC Transporter

Test

Cutoff

q-Value

.005

p-Value

|             | Signif | Direction | Applies To   |
|-------------|--------|-----------|--------------|
| Red         | yes    | +         | ratios, bars |
| Yellow      | no     | n/a       | bars         |
| Green       | yes    | -         | ratios, bars |
| Pink        | yes    | +         | p-, q-Values |
| Light Green | yes    | -         | p-, q-Values |

Dot Plots Dot Plots



Summary Table

SgFn vs Sg

SgPg vs Sg

SgPgFn vs Sg

SgPg vs SgFn

SgPgFn vs SgFn

SgPgFn vs SgPg

Coverage

SgPgFn vs SgPg

Raw

Normalized

Log<sub>2</sub> Ratios

| Protein  | SgPgFn vs SgPg         |                      |         |         | Raw      |          | Normalized |           | Description                                                                  | Log <sub>2</sub> Ratios |    |    |   |   |   |   |
|----------|------------------------|----------------------|---------|---------|----------|----------|------------|-----------|------------------------------------------------------------------------------|-------------------------|----|----|---|---|---|---|
|          | Log <sub>2</sub> Ratio | Log <sub>2</sub> Sum | q-Value | p-Value | SgPgFn   | SgPg     | SgPgFn     | SgPg      |                                                                              | -6                      | -4 | -2 | 0 | 2 | 4 | 6 |
| SGO_1377 | -1.576                 | 5.577                | 0.0051  | 0.0025  | 4.500    | 16.500   | 8.2988     | 17.2384   | sulfatase                                                                    |                         |    |    |   |   |   |   |
|          |                        |                      |         |         | 2.000    | 18.000   | 4.2052     | 18.0000   |                                                                              |                         |    |    |   |   |   |   |
| SGO_1381 | -0.400                 | 5.525                | 0.0533  | 0.1243  | 5.500    | 10.000   | 10.1430    | 10.4475   | csn1; CRISPR-associated protein, Csn1 family                                 |                         |    |    |   |   |   |   |
|          |                        |                      |         |         | 4.500    | 16.000   | 9.4617     | 16.0000   |                                                                              |                         |    |    |   |   |   |   |
| SGO_1383 | 0.121                  | 8.897                | 0.0576  | 0.1374  | 65.500   | 102.000  | 120.7938   | 106.5647  | rplS; ribosomal protein L19                                                  |                         |    |    |   |   |   |   |
|          |                        |                      |         |         | 60.500   | 122.000  | 127.2069   | 122.0000  |                                                                              |                         |    |    |   |   |   |   |
| SGO_1390 | 0.065                  | 4.991                | 0.1897  | 0.6735  | 5.500    | 8.000    | 10.1430    | 8.3580    | ligA; DNA ligase, NAD-dependent                                              |                         |    |    |   |   |   |   |
|          |                        |                      |         |         | 3.000    | 7.000    | 6.3078     | 7.0000    |                                                                              |                         |    |    |   |   |   |   |
| SGO_1397 | -0.516                 | 6.352                | 0.0165  | 0.0202  | 8.500    | 25.500   | 15.6755    | 26.6412   | map; methionine aminopeptidase, type I                                       |                         |    |    |   |   |   |   |
|          |                        |                      |         |         | 8.500    | 21.500   | 17.8720    | 21.5000   |                                                                              |                         |    |    |   |   |   |   |
| SGO_1400 | -0.450                 | 5.155                | 0.1586  | 0.5277  | 6.500    | 10.000   | 11.9872    | 10.4475   | murA-2; UDP-N-acetylglucosamine 1-carboxyvinyltransferase                    |                         |    |    |   |   |   |   |
|          |                        |                      |         |         | 2.000    | 9.000    | 4.2052     | 9.0000    |                                                                              |                         |    |    |   |   |   |   |
| SGO_1414 | 1.446                  | 4.504                | 0.0057  | 0.0031  | 5.000    | 2.500    | 9.2209     | 2.6119    | rexB; putative exonuclease RexB                                              |                         |    |    |   |   |   |   |
|          |                        |                      |         |         | 3.500    | 3.500    | 7.3591     | 3.5000    |                                                                              |                         |    |    |   |   |   |   |
| SGO_1422 | 0.752                  | 6.562                | 0.0229  | 0.0351  | 13.000   | 17.000   | 23.9743    | 17.7608   | hypothetical protein SGO_1422                                                |                         |    |    |   |   |   |   |
|          |                        |                      |         |         | 17.000   | 17.000   | 35.7441    | 17.0000   |                                                                              |                         |    |    |   |   |   |   |
| SGO_1426 | 0.293                  | 14.775               | 0.0037  | 0.0009  | 4114.000 | 5900.500 | 7586.9564  | 6164.5617 | eno; enolase                                                                 |                         |    |    |   |   |   |   |
|          |                        |                      |         |         | 3729.500 | 6433.500 | 7841.6227  | 6433.5000 |                                                                              |                         |    |    |   |   |   |   |
| SGO_1431 | -0.341                 | 8.748                | 0.0026  | 0.0005  | 51.500   | 117.500  | 94.9753    | 122.7584  | EzrA; Septation ring formation regulator ezrA                                |                         |    |    |   |   |   |   |
|          |                        |                      |         |         | 45.000   | 117.500  | 94.6167    | 117.5000  |                                                                              |                         |    |    |   |   |   |   |
| SGO_1432 | -0.502                 | 7.053                | 0.0667  | 0.1681  | 19.500   | 31.000   | 35.9615    | 32.3873   | gyrB; DNA gyrase, B subunit                                                  |                         |    |    |   |   |   |   |
|          |                        |                      |         |         | 9.500    | 44.500   | 19.9746    | 44.5000   |                                                                              |                         |    |    |   |   |   |   |
| SGO_1434 | -0.345                 | 3.738                | 0.1566  | 0.5087  | 2.000    | 3.500    | 3.6884     | 3.6566    | thiJ; 4-methyl-5(beta-hydroxyethyl)-thiazole monophosphate synthesis protein |                         |    |    |   |   |   |   |
|          |                        |                      |         |         |          | 6.000    |            | 6.0000    |                                                                              |                         |    |    |   |   |   |   |

- Show detected proteins only  
 Show all proteins

Proteins found:  
627

Filter by category:

ABC Transporter

Test

Cutoff

q-Value

.005

p-Value

|             | Signif | Direction | Applies To   |
|-------------|--------|-----------|--------------|
| Red         | yes    | +         | ratios, bars |
| Yellow      | no     | n/a       | bars         |
| Green       | yes    | -         | ratios, bars |
| Pink        | yes    | +         | p-, q-Values |
| Light Green | yes    | -         | p-, q-Values |

Dot Plots Dot Plots

Summary Table

SgFn vs Sg

SgPg vs Sg

SgPgFn vs Sg

SgPg vs SgFn

SgPgFn vs SgFn

SgPgFn vs SgPg

Coverage

SgPgFn vs SgPg

Raw

Normalized

Log<sub>2</sub> Ratios

| Protein  | SgPgFn vs SgPg         |                      |         |         | Raw     |         | Normalized |          | Description                                                      | Log <sub>2</sub> Ratios |    |    |   |   |
|----------|------------------------|----------------------|---------|---------|---------|---------|------------|----------|------------------------------------------------------------------|-------------------------|----|----|---|---|
|          | Log <sub>2</sub> Ratio | Log <sub>2</sub> Sum | q-Value | p-Value | SgPgFn  | SgPg    | SgPgFn     | SgPg     |                                                                  | -6                      | -4 | -2 | 0 | 2 |
| SGO_1439 | 0.801                  | 5.885                | 0.0103  | 0.0094  | 9.000   | 11.000  | 16.5976    | 11.4923  | ftsX; cell division protein FtsX                                 |                         |    |    |   |   |
|          |                        |                      |         |         | 10.000  | 10.000  | 21.0259    | 10.0000  |                                                                  |                         |    |    |   |   |
| SGO_1440 | -0.761                 | 6.532                | 0.0017  | 0.0002  | 9.500   | 27.000  | 17.5197    | 28.2083  | cell-division ATP-binding protein FtsE                           |                         |    |    |   |   |
|          |                        |                      |         |         | 8.000   | 30.000  | 16.8207    | 30.0000  |                                                                  |                         |    |    |   |   |
| SGO_1441 | -0.331                 | 6.072                | 0.1586  | 0.5279  | 11.500  | 13.500  | 21.2081    | 14.1042  | prfB; peptide chain release factor 2                             |                         |    |    |   |   |
|          |                        |                      |         |         | 4.500   | 22.500  | 9.4617     | 22.5000  |                                                                  |                         |    |    |   |   |
| SGO_1446 | -2.303                 | 5.644                | 0.0026  | 0.0006  | 3.000   | 18.500  | 5.5325     | 19.3279  | murF; UDP-N-acetylmuramoyl-tripeptide--D-alanyl-D-alanine ligase |                         |    |    |   |   |
|          |                        |                      |         |         | 1.500   | 22.000  | 3.1539     | 22.0000  |                                                                  |                         |    |    |   |   |
| SGO_1447 | -0.928                 | 6.423                | 0.0057  | 0.0032  | 8.000   | 29.500  | 14.7534    | 30.8202  | ddlA; D-Ala-D-Ala ligase                                         |                         |    |    |   |   |
|          |                        |                      |         |         | 7.000   | 25.500  | 14.7182    | 25.5000  |                                                                  |                         |    |    |   |   |
| SGO_1450 | -0.361                 | 5.099                | 0.2139  | 0.7870  | 2.000   | 10.500  | 3.6884     | 10.9699  | hypothetical protein SGO_1450                                    |                         |    |    |   |   |
|          |                        |                      |         |         | 6.000   | 7.000   | 12.6156    | 7.0000   |                                                                  |                         |    |    |   |   |
| SGO_1451 | 0.752                  | 7.695                | 0.0032  | 0.0008  | 33.500  | 37.000  | 61.7800    | 38.6558  | frr; ribosome recycling factor                                   |                         |    |    |   |   |
|          |                        |                      |         |         | 32.500  | 38.500  | 68.3343    | 38.5000  |                                                                  |                         |    |    |   |   |
| SGO_1452 | -0.243                 | 7.184                | 0.0848  | 0.2275  | 17.500  | 45.500  | 32.2731    | 47.5362  | pyrH; uridylate kinase                                           |                         |    |    |   |   |
|          |                        |                      |         |         | 16.000  | 32.000  | 33.6415    | 32.0000  |                                                                  |                         |    |    |   |   |
| SGO_1453 | 0.282                  | 5.393                | 0.1618  | 0.5445  | 10.000  | 11.500  | 18.4418    | 12.0147  | glycosyl transferase, family 8 SP1766                            |                         |    |    |   |   |
|          |                        |                      |         |         | 5.500   |         | 11.5643    |          |                                                                  |                         |    |    |   |   |
| SGO_1455 | -0.007                 | 10.022               | 0.2492  | 0.9697  | 117.500 | 208.000 | 216.6911   | 217.3085 | rplA; ribosomal protein L1                                       |                         |    |    |   |   |
|          |                        |                      |         |         | 143.500 | 304.000 | 301.7222   | 304.0000 |                                                                  |                         |    |    |   |   |
| SGO_1456 | 0.777                  | 8.133                | 0.0094  | 0.0079  | 45.500  | 41.500  | 83.9102    | 43.3572  | rplK; ribosomal protein L11                                      |                         |    |    |   |   |
|          |                        |                      |         |         | 44.000  | 61.000  | 92.5141    | 61.0000  |                                                                  |                         |    |    |   |   |
| SGO_1458 | 0.287                  | 3.299                | 0.1503  | 0.4830  | 2.000   | 3.500   | 3.6884     | 3.6566   | aha1; cation-transporting ATPase yfgQ                            |                         |    |    |   |   |
|          |                        |                      |         |         |         | 2.500   |            | 2.5000   |                                                                  |                         |    |    |   |   |

- Show detected proteins only  
 Show all proteins

Proteins found:  
627

Filter by category:

ABC Transporter

Test

Cutoff

q-Value

.005

p-Value

|             | Signif | Direction | Applies To   |
|-------------|--------|-----------|--------------|
| Red         | yes    | +         | ratios, bars |
| Yellow      | no     | n/a       | bars         |
| Green       | yes    | -         | ratios, bars |
| Pink        | yes    | +         | p-, q-Values |
| Light Green | yes    | -         | p-, q-Values |

Dot Plots Dot Plots

Summary Table

SgFn vs Sg

SgPg vs Sg

SgPgFn vs Sg

SgPg vs SgFn

SgPgFn vs SgFn

SgPgFn vs SgPg

Coverage

SgPgFn vs SgPg

Raw

Normalized

Log<sub>2</sub> Ratios

| Protein  | SgPgFn vs SgPg         |                      |         |         | Raw    |        | Normalized |         | Description                                     | Log <sub>2</sub> Ratios |    |    |   |   |   |   |
|----------|------------------------|----------------------|---------|---------|--------|--------|------------|---------|-------------------------------------------------|-------------------------|----|----|---|---|---|---|
|          | Log <sub>2</sub> Ratio | Log <sub>2</sub> Sum | q-Value | p-Value | SgPgFn | SgPg   | SgPgFn     | SgPg    |                                                 | -6                      | -4 | -2 | 0 | 2 | 4 | 6 |
| SGO_1460 | -0.608                 | 4.901                | 0.0251  | 0.0404  | 4.000  | 11.000 | 7.3767     | 11.4923 | DNA translocase ftsK                            |                         |    |    |   |   |   |   |
|          |                        |                      |         |         |        | 11.000 |            | 11.0000 |                                                 |                         |    |    |   |   |   |   |
| SGO_1463 | -0.139                 | 5.848                | 0.1013  | 0.2915  | 8.000  | 16.000 | 14.7534    | 16.7160 | peptidyl-prolyl cis-trans isomerase             |                         |    |    |   |   |   |   |
|          |                        |                      |         |         | 6.000  | 13.500 | 12.6156    | 13.5000 |                                                 |                         |    |    |   |   |   |   |
| SGO_1464 | -0.793                 | 5.996                | 0.0050  | 0.0018  | 7.000  | 20.000 | 12.9093    | 20.8950 | uncharacterized probable metal-binding protein  |                         |    |    |   |   |   |   |
|          |                        |                      |         |         | 5.000  | 19.500 | 10.5130    | 19.5000 |                                                 |                         |    |    |   |   |   |   |
| SGO_1465 | -0.686                 | 6.485                | 0.0158  | 0.0184  | 10.000 | 30.000 | 18.4418    | 31.3426 | ABC transporter, ATP-binding protein SP0770     |                         |    |    |   |   |   |   |
|          |                        |                      |         |         | 7.500  | 24.000 | 15.7695    | 24.0000 |                                                 |                         |    |    |   |   |   |   |
| SGO_1469 | -0.052                 | 7.514                | 0.1588  | 0.5306  | 22.500 | 43.000 | 41.4940    | 44.9244 | glmU; UDP-N-acetylglucosamine pyrophosphorylase |                         |    |    |   |   |   |   |
|          |                        |                      |         |         | 23.000 | 48.000 | 48.3597    | 48.0000 |                                                 |                         |    |    |   |   |   |   |
| SGO_1472 | -0.828                 | 3.906                | 0.1256  | 0.3862  |        | 7.500  |            | 7.8356  | acetyltransferase, GNAT family                  |                         |    |    |   |   |   |   |
|          |                        |                      |         |         | 1.500  | 4.000  | 3.1539     | 4.0000  |                                                 |                         |    |    |   |   |   |   |
| SGO_1516 | -0.925                 | 5.776                | 0.0172  | 0.0219  | 5.000  | 14.000 | 9.2209     | 14.6265 | lacD-2; tagatose 1,6-diphosphate aldolase       |                         |    |    |   |   |   |   |
|          |                        |                      |         |         | 4.500  | 21.500 | 9.4617     | 21.5000 |                                                 |                         |    |    |   |   |   |   |
| SGO_1530 | -0.402                 | 7.851                | 0.0073  | 0.0049  | 26.000 | 66.000 | 47.9487    | 68.9537 | methionine-tRNA ligase                          |                         |    |    |   |   |   |   |
|          |                        |                      |         |         | 24.500 | 62.500 | 51.5135    | 62.5000 |                                                 |                         |    |    |   |   |   |   |
| SGO_1531 | -0.715                 | 5.962                | 0.0212  | 0.0304  | 5.000  | 20.000 | 9.2209     | 20.8950 | xth; exodeoxyribonuclease III                   |                         |    |    |   |   |   |   |
|          |                        |                      |         |         | 7.000  | 17.500 | 14.7182    | 17.5000 |                                                 |                         |    |    |   |   |   |   |
| SGO_1534 | 0.195                  | 5.182                | 0.2345  | 0.8886  |        | 15.500 |            | 16.1937 | ArsC family                                     |                         |    |    |   |   |   |   |
|          |                        |                      |         |         | 6.000  | 7.500  | 12.6156    | 7.5000  |                                                 |                         |    |    |   |   |   |   |
| SGO_1536 | -0.779                 | 5.622                | 0.0396  | 0.0794  | 4.000  | 19.000 | 7.3767     | 19.8503 | conserved hypothetical protein TIGR00096        |                         |    |    |   |   |   |   |
|          |                        |                      |         |         | 5.000  | 11.500 | 10.5130    | 11.5000 |                                                 |                         |    |    |   |   |   |   |
| SGO_1539 | 0.084                  | 6.150                | 0.1727  | 0.5986  | 8.000  | 15.000 | 14.7534    | 15.6713 | tmk; thymidylate kinase                         |                         |    |    |   |   |   |   |
|          |                        |                      |         |         | 10.500 | 18.500 | 22.0772    | 18.5000 |                                                 |                         |    |    |   |   |   |   |

- Show detected proteins only  
 Show all proteins

Proteins found:  
627

Filter by category:

ABC Transporter

Test

Cutoff

q-Value

.005

p-Value

|             | Signif | Direction | Applies To   |
|-------------|--------|-----------|--------------|
| Red         | yes    | +         | ratios, bars |
| Yellow      | no     | n/a       | bars         |
| Green       | yes    | -         | ratios, bars |
| Pink        | yes    | +         | p-, q-Values |
| Light Green | yes    | -         | p-, q-Values |

Dot Plots Dot Plots

Summary Table

SgFn vs Sg

SgPg vs Sg

SgPgFn vs Sg

SgPg vs SgFn

SgPgFn vs SgFn

SgPgFn vs SgPg

Coverage

SgPgFn vs SgPg

Raw

Normalized

Log<sub>2</sub> Ratios

| Protein  | SgPgFn vs SgPg         |                      |         |         | Raw     |         | Normalized |          | Description                                                    | Log <sub>2</sub> Ratios |    |    |   |   |
|----------|------------------------|----------------------|---------|---------|---------|---------|------------|----------|----------------------------------------------------------------|-------------------------|----|----|---|---|
|          | Log <sub>2</sub> Ratio | Log <sub>2</sub> Sum | q-Value | p-Value | SgPgFn  | SgPg    | SgPgFn     | SgPg     |                                                                | -6                      | -4 | -2 | 0 | 2 |
| SGO_1541 | -0.596                 | 5.759                | 0.0271  | 0.0458  | 4.500   | 15.500  | 8.2988     | 16.1937  | atpC; ATP synthase F1, epsilon subunit                         |                         |    |    |   |   |
|          |                        |                      |         |         | 6.500   | 16.000  | 13.6669    | 16.0000  |                                                                |                         |    |    |   |   |
| SGO_1542 | -0.014                 | 9.171                | 0.2260  | 0.8480  | 73.000  | 134.000 | 134.6251   | 139.9968 | atpD; ATP synthase F1, beta subunit                            |                         |    |    |   |   |
|          |                        |                      |         |         | 72.500  | 149.500 | 152.4380   | 149.5000 |                                                                |                         |    |    |   |   |
| SGO_1543 | -1.264                 | 5.625                | 0.0026  | 0.0005  | 4.500   | 17.000  | 8.2988     | 17.7608  | atpG; ATP synthase F1, gamma subunit                           |                         |    |    |   |   |
|          |                        |                      |         |         | 3.000   | 17.000  | 6.3078     | 17.0000  |                                                                |                         |    |    |   |   |
| SGO_1544 | 0.051                  | 9.229                | 0.1101  | 0.3231  | 79.000  | 137.500 | 145.6902   | 143.6535 | atpA; ATP synthase F1, alpha subunit                           |                         |    |    |   |   |
|          |                        |                      |         |         | 76.000  | 151.000 | 159.7971   | 151.0000 |                                                                |                         |    |    |   |   |
| SGO_1545 | -0.805                 | 5.751                | 0.0010  | 0.0001  | 5.500   | 16.500  | 10.1430    | 17.2384  | atpH; ATP synthase F1, delta subunit                           |                         |    |    |   |   |
|          |                        |                      |         |         | 4.500   | 17.000  | 9.4617     | 17.0000  |                                                                |                         |    |    |   |   |
| SGO_1546 | -0.137                 | 6.983                | 0.1164  | 0.3521  | 16.500  | 37.000  | 30.4290    | 38.6558  | atpF; ATP synthase F0, B subunit                               |                         |    |    |   |   |
|          |                        |                      |         |         | 14.000  | 28.000  | 29.4363    | 28.0000  |                                                                |                         |    |    |   |   |
| SGO_1550 | -0.554                 | 7.392                | 0.0092  | 0.0072  | 16.500  | 49.500  | 30.4290    | 51.7152  | glgP-1; glycogen phosphorylase                                 |                         |    |    |   |   |
|          |                        |                      |         |         | 18.000  | 48.000  | 37.8467    | 48.0000  |                                                                |                         |    |    |   |   |
| SGO_1551 | -0.272                 | 5.395                | 0.1285  | 0.4007  | 4.000   | 14.000  | 7.3767     | 14.6265  | glgA; Glycogen synthase                                        |                         |    |    |   |   |
|          |                        |                      |         |         | 5.500   | 8.500   | 11.5643    | 8.5000   |                                                                |                         |    |    |   |   |
| SGO_1552 | 0.226                  | 7.345                | 0.1627  | 0.5498  | 27.500  | 47.000  | 50.7149    | 49.1034  | glgD; glucose-1-phosphate<br>adenylyltransferase, GlgD subunit |                         |    |    |   |   |
|          |                        |                      |         |         | 17.000  | 27.000  | 35.7441    | 27.0000  |                                                                |                         |    |    |   |   |
| SGO_1553 | -0.314                 | 7.391                | 0.0050  | 0.0021  | 19.500  | 45.000  | 35.9615    | 47.0139  | glgC; glucose-1-phosphate<br>adenylyltransferase               |                         |    |    |   |   |
|          |                        |                      |         |         | 18.500  | 46.000  | 38.8980    | 46.0000  |                                                                |                         |    |    |   |   |
| SGO_1554 | -0.014                 | 7.510                | 0.2269  | 0.8526  | 23.000  | 44.500  | 42.4161    | 46.4915  | glgB; 1,4-alpha-glucan branching enzyme                        |                         |    |    |   |   |
|          |                        |                      |         |         | 23.000  | 45.000  | 48.3597    | 45.0000  |                                                                |                         |    |    |   |   |
| SGO_1555 | -0.372                 | 10.552               | 0.0100  | 0.0088  | 163.500 | 410.000 | 301.5234   | 428.3485 | ptsI; phosphoenolpyruvate-protein<br>phosphotransferase        |                         |    |    |   |   |
|          |                        |                      |         |         | 168.500 | 417.500 | 354.2870   | 417.5000 |                                                                |                         |    |    |   |   |

- Show detected proteins only  
 Show all proteins

Proteins found:  
627

Filter by category:

ABC Transporter

Test

Cutoff

q-Value

.005

p-Value

|             | Signif | Direction | Applies To   |
|-------------|--------|-----------|--------------|
| Red         | yes    | +         | ratios, bars |
| Yellow      | no     | n/a       | bars         |
| Green       | yes    | -         | ratios, bars |
| Pink        | yes    | +         | p-, q-Values |
| Light Green | yes    | -         | p-, q-Values |

Dot Plots Dot Plots

Summary Table

SgFn vs Sg

SgPg vs Sg

SgPgFn vs Sg

SgPg vs SgFn

SgPgFn vs SgFn

SgPgFn vs SgPg

Coverage

SgPgFn vs SgPg

Raw

Normalized

Log<sub>2</sub> Ratios

| Protein  | SgPgFn vs SgPg         |                      |         |         | Raw     |         | Normalized |          | Description                                                  | Log <sub>2</sub> Ratios |    |    |   |   |   |   |
|----------|------------------------|----------------------|---------|---------|---------|---------|------------|----------|--------------------------------------------------------------|-------------------------|----|----|---|---|---|---|
|          | Log <sub>2</sub> Ratio | Log <sub>2</sub> Sum | q-Value | p-Value | SgPgFn  | SgPg    | SgPgFn     | SgPg     |                                                              | -6                      | -4 | -2 | 0 | 2 | 4 | 6 |
| SGO_1556 | 0.890                  | 11.617               | 0.0158  | 0.0186  | 467.500 | 455.500 | 862.1541   | 475.8847 | phosphocarrier protein HPr                                   |                         |    |    |   |   |   |   |
|          |                        |                      |         |         | 561.500 | 622.500 | 1180.6063  | 622.5000 |                                                              |                         |    |    |   |   |   |   |
| SGO_1558 | -0.072                 | 8.045                | 0.0087  | 0.0065  | 34.500  | 64.500  | 63.6242    | 67.3865  | nrdE; ribonucleoside-diphosphate reductase large chain       |                         |    |    |   |   |   |   |
|          |                        |                      |         |         | 31.000  | 68.000  | 65.1804    | 68.0000  |                                                              |                         |    |    |   |   |   |   |
| SGO_1559 | 0.143                  | 8.182                | 0.0200  | 0.0282  | 41.000  | 69.000  | 75.6114    | 72.0879  | ribonucleoside-diphosphate reductase, beta subunit           |                         |    |    |   |   |   |   |
|          |                        |                      |         |         | 36.500  | 66.000  | 76.7447    | 66.0000  |                                                              |                         |    |    |   |   |   |   |
| SGO_1570 | -0.417                 | 8.885                | 0.0185  | 0.0248  | 50.000  | 139.500 | 92.2090    | 145.7430 | alaS; alanyl-tRNA synthetase                                 |                         |    |    |   |   |   |   |
|          |                        |                      |         |         | 52.500  | 124.500 | 110.3862   | 124.5000 |                                                              |                         |    |    |   |   |   |   |
| SGO_1574 | -0.272                 | 8.868                | 0.0050  | 0.0020  | 55.500  | 123.500 | 102.3520   | 129.0269 | pepF-1; oligoendopeptidase F                                 |                         |    |    |   |   |   |   |
|          |                        |                      |         |         | 52.000  | 126.500 | 109.3349   | 126.5000 |                                                              |                         |    |    |   |   |   |   |
| SGO_1580 | -0.150                 | 5.058                | 0.1529  | 0.4943  | 3.500   | 9.000   | 6.4546     | 9.4028   | PTS system, Lactose/Cellobiose specific IIB subunit          |                         |    |    |   |   |   |   |
|          |                        |                      |         |         | 4.500   | 8.000   | 9.4617     | 8.0000   |                                                              |                         |    |    |   |   |   |   |
| SGO_1585 | 0.456                  | 3.557                | 0.2327  | 0.8803  |         | 1.500   |            | 1.5671   | D-Alanyl-D-Alanine carboxypeptidase                          |                         |    |    |   |   |   |   |
|          |                        |                      |         |         | 2.000   | 6.000   | 4.2052     | 6.0000   |                                                              |                         |    |    |   |   |   |   |
| SGO_1587 | -0.654                 | 5.537                | 0.0426  | 0.0902  | 5.000   | 17.500  | 9.2209     | 18.2832  | queA; S-adenosylmethionine:tRNA ribosyltransferase-isomerase |                         |    |    |   |   |   |   |
|          |                        |                      |         |         | 4.000   | 10.500  | 8.4104     | 10.5000  |                                                              |                         |    |    |   |   |   |   |
| SGO_1591 | -0.291                 | 5.239                | 0.0865  | 0.2333  | 4.500   | 12.500  | 8.2988     | 13.0594  | arcC; carbamate kinase                                       |                         |    |    |   |   |   |   |
|          |                        |                      |         |         | 4.000   | 8.000   | 8.4104     | 8.0000   |                                                              |                         |    |    |   |   |   |   |
| SGO_1592 | 0.316                  | 8.455                | 0.0271  | 0.0457  | 58.500  | 74.500  | 107.8845   | 77.8341  | arcB; ornithine carbamoyltransferase                         |                         |    |    |   |   |   |   |
|          |                        |                      |         |         | 41.500  | 78.000  | 87.2576    | 78.0000  |                                                              |                         |    |    |   |   |   |   |
| SGO_1593 | 0.493                  | 8.251                | 0.0030  | 0.0007  | 47.500  | 58.000  | 87.5985    | 60.5956  | arcA; arginine deiminase                                     |                         |    |    |   |   |   |   |
|          |                        |                      |         |         | 43.000  | 66.000  | 90.4115    | 66.0000  |                                                              |                         |    |    |   |   |   |   |
| SGO_1599 | -0.140                 | 9.050                | 0.0520  | 0.1195  | 73.000  | 127.500 | 134.6251   | 133.2059 | sodA; manganese-dependent superoxide dismutase               |                         |    |    |   |   |   |   |
|          |                        |                      |         |         | 56.000  | 144.500 | 117.7452   | 144.5000 |                                                              |                         |    |    |   |   |   |   |

- Show detected proteins only  
 Show all proteins

Proteins found:  
627

Filter by category:

ABC Transporter

Test

Cutoff

q-Value

.005

p-Value

|             | Signif | Direction | Applies To   |
|-------------|--------|-----------|--------------|
| Red         | yes    | +         | ratios, bars |
| Yellow      | no     | n/a       | bars         |
| Green       | yes    | -         | ratios, bars |
| Pink        | yes    | +         | p-, q-Values |
| Light Green | yes    | -         | p-, q-Values |

Dot Plots Dot Plots

Summary Table

SgFn vs Sg

SgPg vs Sg

SgPgFn vs Sg

SgPg vs SgFn

SgPgFn vs SgFn

SgPgFn vs SgPg

Coverage

SgPgFn vs SgPg

Raw

Normalized

Log<sub>2</sub> Ratios

| Protein  | SgPgFn vs SgPg         |                      |         |         | Raw    |        | Normalized |         | Description                                                    | Log <sub>2</sub> Ratios |    |    |   |   |   |   |
|----------|------------------------|----------------------|---------|---------|--------|--------|------------|---------|----------------------------------------------------------------|-------------------------|----|----|---|---|---|---|
|          | Log <sub>2</sub> Ratio | Log <sub>2</sub> Sum | q-Value | p-Value | SgPgFn | SgPg   | SgPgFn     | SgPg    |                                                                | -6                      | -4 | -2 | 0 | 2 | 4 | 6 |
| SGO_1604 | -0.886                 | 3.902                | 0.0769  | 0.2010  |        | 6.500  |            | 6.7909  | acyltransferase family protein                                 |                         |    |    |   |   |   |   |
|          |                        |                      |         |         | 1.500  | 5.000  | 3.1539     | 5.0000  |                                                                |                         |    |    |   |   |   |   |
| SGO_1605 | -1.322                 | 4.245                | 0.0396  | 0.0791  |        | 7.000  |            | 7.3133  | P-type ATPase, metal cation transport                          |                         |    |    |   |   |   |   |
|          |                        |                      |         |         | 1.500  | 8.500  | 3.1539     | 8.5000  |                                                                |                         |    |    |   |   |   |   |
| SGO_1609 | -0.173                 | 7.225                | 0.0366  | 0.0712  | 20.500 | 37.000 | 37.8057    | 38.6558 | ATP-dependent RNA helicase, DEAD/DEAH box family               |                         |    |    |   |   |   |   |
|          |                        |                      |         |         | 15.500 | 40.500 | 32.5902    | 40.5000 |                                                                |                         |    |    |   |   |   |   |
| SGO_1617 | -0.226                 | 5.887                | 0.1256  | 0.3856  | 6.500  | 11.000 | 11.9872    | 11.4923 | prfC; peptide chain release factor 3                           |                         |    |    |   |   |   |   |
|          |                        |                      |         |         | 7.000  | 21.000 | 14.7182    | 21.0000 |                                                                |                         |    |    |   |   |   |   |
| SGO_1619 | -0.025                 | 8.040                | 0.2193  | 0.8120  | 38.000 | 73.000 | 70.0788    | 76.2669 | cation-transporting ATPase, E1-E2 family                       |                         |    |    |   |   |   |   |
|          |                        |                      |         |         | 28.500 | 57.000 | 59.9239    | 57.0000 |                                                                |                         |    |    |   |   |   |   |
| SGO_1621 | -1.273                 | 4.429                | 0.0358  | 0.0691  | 2.000  | 8.000  | 3.6884     | 8.3580  | HD domain protein                                              |                         |    |    |   |   |   |   |
|          |                        |                      |         |         |        | 9.500  |            | 9.5000  |                                                                |                         |    |    |   |   |   |   |
| SGO_1622 | 0.319                  | 5.077                | 0.0728  | 0.1866  | 4.000  | 7.000  | 7.3767     | 7.3133  | Cof family protein                                             |                         |    |    |   |   |   |   |
|          |                        |                      |         |         | 5.500  | 7.500  | 11.5643    | 7.5000  |                                                                |                         |    |    |   |   |   |   |
| SGO_1623 | -0.623                 | 5.081                | 0.0248  | 0.0397  | 4.500  | 12.500 | 8.2988     | 13.0594 | murM; MurM                                                     |                         |    |    |   |   |   |   |
|          |                        |                      |         |         |        | 12.500 |            | 12.5000 |                                                                |                         |    |    |   |   |   |   |
| SGO_1624 | 0.326                  | 4.258                | 0.0656  | 0.1623  |        | 6.000  |            | 6.2685  | murN; MurN protein                                             |                         |    |    |   |   |   |   |
|          |                        |                      |         |         | 3.500  | 5.500  | 7.3591     | 5.5000  |                                                                |                         |    |    |   |   |   |   |
| SGO_1625 | -0.898                 | 6.496                | 0.0094  | 0.0077  | 10.500 | 29.000 | 19.3639    | 30.2978 | acetoin utilization putative/CBS domain protein                |                         |    |    |   |   |   |   |
|          |                        |                      |         |         | 6.000  | 28.000 | 12.6156    | 28.0000 |                                                                |                         |    |    |   |   |   |   |
| SGO_1626 | -0.006                 | 6.193                | 0.2367  | 0.9031  | 9.500  | 16.000 | 17.5197    | 16.7160 | branched-chain amino acid ABC transporter, ATP-binding protein |                         |    |    |   |   |   |   |
|          |                        |                      |         |         | 9.000  | 20.000 | 18.9233    | 20.0000 |                                                                |                         |    |    |   |   |   |   |
| SGO_1627 | 0.065                  | 6.204                | 0.1828  | 0.6418  | 12.000 | 18.500 | 22.1302    | 19.3279 | branched-chain amino acid ABC transporter, ATP-binding protein |                         |    |    |   |   |   |   |
|          |                        |                      |         |         | 7.500  | 16.500 | 15.7695    | 16.5000 |                                                                |                         |    |    |   |   |   |   |

- Show detected proteins only  
 Show all proteins

Proteins found:  
627

Filter by category:

ABC Transporter

Test

Cutoff

q-Value

.005

p-Value

|             | Signif | Direction | Applies To   |
|-------------|--------|-----------|--------------|
| Red         | yes    | +         | ratios, bars |
| Yellow      | no     | n/a       | bars         |
| Green       | yes    | -         | ratios, bars |
| Pink        | yes    | +         | p-, q-Values |
| Light Green | yes    | -         | p-, q-Values |

Dot Plots Dot Plots

Summary Table

SgFn vs Sg

SgPg vs Sg

SgPgFn vs Sg

SgPg vs SgFn

SgPgFn vs SgFn

SgPgFn vs SgPg

Coverage

SgPgFn vs SgPg

Raw

Normalized

Log<sub>2</sub> Ratios

| Protein  | SgPgFn vs SgPg         |                      |         |         | Raw    |         |          |          | Normalized |         |          |          | Description                                                           | Log <sub>2</sub> Ratios |    |    |   |   |   |   |
|----------|------------------------|----------------------|---------|---------|--------|---------|----------|----------|------------|---------|----------|----------|-----------------------------------------------------------------------|-------------------------|----|----|---|---|---|---|
|          | Log <sub>2</sub> Ratio | Log <sub>2</sub> Sum | q-Value | p-Value | SgPgFn | SgPg    | SgPgFn   | SgPg     | SgPgFn     | SgPg    | SgPgFn   | SgPg     |                                                                       | -6                      | -4 | -2 | 0 | 2 | 4 | 6 |
| SGO_1630 | -0.444                 | 9.189                | 0.0012  | 0.0001  | 68.500 | 162.000 | 126.3263 | 169.2499 | 57.500     | 167.000 | 120.8991 | 167.0000 | branched-chain amino acid ABC transporter, amino acid-binding protein |                         |    |    |   |   |   |   |
|          |                        |                      |         |         |        |         |          |          |            |         |          |          |                                                                       |                         |    |    |   |   |   |   |
| SGO_1632 | 0.618                  | 7.022                | 0.0768  | 0.1997  | 12.500 | 22.500  | 23.0522  | 23.5069  | 28.000     | 24.500  | 58.8726  | 24.5000  | clpP; ATP-dependent Clp protease, proteolytic subunit ClpP            |                         |    |    |   |   |   |   |
|          |                        |                      |         |         |        |         |          |          |            |         |          |          |                                                                       |                         |    |    |   |   |   |   |
| SGO_1633 | -0.097                 | 7.949                | 0.1841  | 0.6500  | 38.500 | 60.000  | 71.0009  | 62.6851  | 23.500     | 64.000  | 49.4109  | 64.0000  | upp; uracil phosphoribosyltransferase                                 |                         |    |    |   |   |   |   |
|          |                        |                      |         |         |        |         |          |          |            |         |          |          |                                                                       |                         |    |    |   |   |   |   |
| SGO_1648 | -0.261                 | 9.108                | 0.0541  | 0.1270  | 70.500 | 124.500 | 130.0147 | 130.0717 | 57.000     | 172.000 | 119.8478 | 172.0000 | ppx1; inorganic pyrophosphatase, manganese-dependent                  |                         |    |    |   |   |   |   |
|          |                        |                      |         |         |        |         |          |          |            |         |          |          |                                                                       |                         |    |    |   |   |   |   |
| SGO_1649 | 0.029                  | 3.498                | 0.2429  | 0.9375  | 2.000  | 2.500   | 3.6884   | 2.6119   |            | 5.000   |          | 5.0000   | act; pyruvate formate-lyase-activating enzyme                         |                         |    |    |   |   |   |   |
|          |                        |                      |         |         |        |         |          |          |            |         |          |          |                                                                       |                         |    |    |   |   |   |   |
| SGO_1652 | -0.197                 | 6.691                | 0.0007  | 0.0000  | 13.000 | 26.500  | 23.9743  | 27.6859  | 11.500     | 27.500  | 24.1798  | 27.5000  | intracellular glycosyl hydrolase                                      |                         |    |    |   |   |   |   |
|          |                        |                      |         |         |        |         |          |          |            |         |          |          |                                                                       |                         |    |    |   |   |   |   |
| SGO_1653 | -0.301                 | 7.020                | 0.1579  | 0.5204  | 10.500 | 32.500  | 19.3639  | 33.9545  | 19.500     | 35.500  | 41.0006  | 35.5000  | trehalose PTS enzyme II                                               |                         |    |    |   |   |   |   |
|          |                        |                      |         |         |        |         |          |          |            |         |          |          |                                                                       |                         |    |    |   |   |   |   |
| SGO_1666 | -1.505                 | 5.335                | 0.0052  | 0.0026  | 3.500  | 15.500  | 6.4546   | 16.1937  | 2.000      | 13.500  | 4.2052   | 13.5000  | trkA; potassium uptake protein, Trk family                            |                         |    |    |   |   |   |   |
|          |                        |                      |         |         |        |         |          |          |            |         |          |          |                                                                       |                         |    |    |   |   |   |   |
| SGO_1669 | 0.006                  | 6.372                | 0.2463  | 0.9553  | 11.000 | 22.500  | 20.2860  | 23.5069  | 10.000     | 18.000  | 21.0259  | 18.0000  | ribosomal large subunit pseudouridine synthase B                      |                         |    |    |   |   |   |   |
|          |                        |                      |         |         |        |         |          |          |            |         |          |          |                                                                       |                         |    |    |   |   |   |   |
| SGO_1675 | -0.161                 | 5.315                | 0.1661  | 0.5658  | 4.000  | 8.500   | 7.3767   | 8.8804   | 5.500      | 12.000  | 11.5643  | 12.0000  | HAM1 protein-like protein                                             |                         |    |    |   |   |   |   |
|          |                        |                      |         |         |        |         |          |          |            |         |          |          |                                                                       |                         |    |    |   |   |   |   |
| SGO_1676 | -0.645                 | 5.659                | 0.0113  | 0.0108  | 4.500  | 14.500  | 8.2988   | 15.1489  | 5.500      | 15.500  | 11.5643  | 15.5000  | murI; glutamate racemase                                              |                         |    |    |   |   |   |   |
|          |                        |                      |         |         |        |         |          |          |            |         |          |          |                                                                       |                         |    |    |   |   |   |   |
| SGO_1678 | -0.523                 | 4.291                | 0.1651  | 0.5609  | 2.500  | 10.500  | 4.6104   | 10.9699  |            | 4.000   |          | 4.0000   | lysA; diaminopimelate decarboxylase                                   |                         |    |    |   |   |   |   |
|          |                        |                      |         |         |        |         |          |          |            |         |          |          |                                                                       |                         |    |    |   |   |   |   |

- Show detected proteins only  
 Show all proteins

Proteins found:  
627

Filter by category:

Test

Cutoff

q-Value

.005

p-Value

|             | Signif | Direction | Applies To   |
|-------------|--------|-----------|--------------|
| Red         | yes    | +         | ratios, bars |
| Yellow      | no     | n/a       | bars         |
| Green       | yes    | -         | ratios, bars |
| Pink        | yes    | +         | p-, q-Values |
| Light Green | yes    | -         | p-, q-Values |

Dot Plots  Dot Plots

Summary Table

SgFn vs Sg

SgPg vs Sg

SgPgFn vs Sg

SgPg vs SgFn

SgPgFn vs SgFn

SgPgFn vs SgPg

Coverage

SgPgFn vs SgPg

Raw

Normalized

Log<sub>2</sub> Ratios

| Protein  | SgPgFn vs SgPg         |                      |         |         | Raw    |         | Normalized |          | Description                                                       | Log <sub>2</sub> Ratios |    |    |   |   |   |   |
|----------|------------------------|----------------------|---------|---------|--------|---------|------------|----------|-------------------------------------------------------------------|-------------------------|----|----|---|---|---|---|
|          | Log <sub>2</sub> Ratio | Log <sub>2</sub> Sum | q-Value | p-Value | SgPgFn | SgPg    | SgPgFn     | SgPg     |                                                                   | -6                      | -4 | -2 | 0 | 2 | 4 | 6 |
| SGO_1679 | -0.165                 | 9.433                | 0.0933  | 0.2616  | 82.000 | 198.000 | 151.2228   | 206.8610 | phosphotransferase system enzyme II                               |                         |    |    |   |   |   |   |
|          |                        |                      |         |         | 82.500 | 159.500 | 173.4640   | 159.5000 |                                                                   |                         |    |    |   |   |   |   |
| SGO_1680 | 0.823                  | 5.498                | 0.0228  | 0.0348  | 11.500 | 11.000  | 21.2081    | 11.4923  | phosphotransferase system enzyme II                               |                         |    |    |   |   |   |   |
|          |                        |                      |         |         |        | 12.500  |            | 12.5000  |                                                                   |                         |    |    |   |   |   |   |
| SGO_1681 | 0.003                  | 8.594                | 0.2354  | 0.8967  | 46.000 | 93.000  | 84.8323    | 97.1620  | PTS system, mannose/fructose/sorbose family, IID component        |                         |    |    |   |   |   |   |
|          |                        |                      |         |         | 52.000 | 95.000  | 109.3349   | 95.0000  |                                                                   |                         |    |    |   |   |   |   |
| SGO_1683 | -0.191                 | 7.970                | 0.0457  | 0.0994  | 34.500 | 67.000  | 63.6242    | 69.9984  | serS; seryl-tRNA synthetase                                       |                         |    |    |   |   |   |   |
|          |                        |                      |         |         | 25.500 | 63.500  | 53.6161    | 63.5000  |                                                                   |                         |    |    |   |   |   |   |
| SGO_1684 | 0.009                  | 6.534                | 0.2382  | 0.9134  | 11.000 | 24.000  | 20.2860    | 25.0741  | acyl-CoA dehydrogenase family                                     |                         |    |    |   |   |   |   |
|          |                        |                      |         |         | 12.500 | 21.000  | 26.2824    | 21.0000  |                                                                   |                         |    |    |   |   |   |   |
| SGO_1685 | 0.271                  | 8.571                | 0.0582  | 0.1392  | 65.500 | 84.000  | 120.7938   | 87.7592  | putative peroxidase / antioxidant                                 |                         |    |    |   |   |   |   |
|          |                        |                      |         |         | 42.000 | 83.500  | 88.3089    | 83.5000  |                                                                   |                         |    |    |   |   |   |   |
| SGO_1687 | 0.153                  | 7.586                | 0.0385  | 0.0760  | 28.000 | 46.500  | 51.6370    | 48.5810  | accA; acetyl-CoA carboxylase, carboxyl transferase, alpha subunit |                         |    |    |   |   |   |   |
|          |                        |                      |         |         | 23.500 | 42.500  | 49.4109    | 42.5000  |                                                                   |                         |    |    |   |   |   |   |
| SGO_1688 | -0.983                 | 5.513                | 0.0057  | 0.0032  | 5.000  | 14.500  | 9.2209     | 15.1489  | accD; acetyl-CoA carboxylase, carboxyl transferase, beta subunit  |                         |    |    |   |   |   |   |
|          |                        |                      |         |         | 3.000  | 15.000  | 6.3078     | 15.0000  |                                                                   |                         |    |    |   |   |   |   |
| SGO_1689 | -0.110                 | 7.385                | 0.0381  | 0.0748  | 22.500 | 40.000  | 41.4940    | 41.7901  | accC; acetyl-CoA carboxylase, biotin carboxylase                  |                         |    |    |   |   |   |   |
|          |                        |                      |         |         | 18.500 | 45.000  | 38.8980    | 45.0000  |                                                                   |                         |    |    |   |   |   |   |
| SGO_1690 | -1.456                 | 5.603                | 0.0713  | 0.1821  | 4.000  | 16.000  | 7.3767     | 16.7160  | fabZ; beta-hydroxyacyl-(acyl-carrier-protein) dehydratase FabZ    |                         |    |    |   |   |   |   |
|          |                        |                      |         |         |        | 24.500  |            | 24.5000  |                                                                   |                         |    |    |   |   |   |   |
| SGO_1691 | -0.614                 | 8.006                | 0.0102  | 0.0092  | 24.000 | 77.500  | 44.2603    | 80.9683  | accB; acetyl-CoA carboxylase, biotin carboxyl carrier protein     |                         |    |    |   |   |   |   |
|          |                        |                      |         |         | 27.500 | 74.000  | 57.8213    | 74.0000  |                                                                   |                         |    |    |   |   |   |   |
| SGO_1692 | -0.472                 | 9.471                | 0.0019  | 0.0003  | 78.000 | 196.000 | 143.8460   | 204.7715 | 3-oxoacyl-[acyl-carrier-protein] synthase                         |                         |    |    |   |   |   |   |
|          |                        |                      |         |         | 73.000 | 207.500 | 153.4893   | 207.5000 |                                                                   |                         |    |    |   |   |   |   |

- Show detected proteins only  
 Show all proteins

Proteins found:  
627

Filter by category:

ABC Transporter

Test

Cutoff

q-Value

p-Value

.005

|             | Signif | Direction | Applies To   |
|-------------|--------|-----------|--------------|
| Red         | yes    | +         | ratios, bars |
| Yellow      | no     | n/a       | bars         |
| Green       | yes    | -         | ratios, bars |
| Pink        | yes    | +         | p-, q-Values |
| Light Green | yes    | -         | p-, q-Values |

Dot Plots Dot Plots



Summary Table

SgFn vs Sg

SgPg vs Sg

SgPgFn vs Sg

SgPg vs SgFn

SgPgFn vs SgFn

SgPgFn vs SgPg

Coverage

SgPgFn vs SgPg

Raw

Normalized

Log<sub>2</sub> Ratios

| Protein  | SgPgFn vs SgPg         |                      |         |         | Raw     |         | Normalized |          | Description                                           | Log <sub>2</sub> Ratios |    |    |   |   |   |   |
|----------|------------------------|----------------------|---------|---------|---------|---------|------------|----------|-------------------------------------------------------|-------------------------|----|----|---|---|---|---|
|          | Log <sub>2</sub> Ratio | Log <sub>2</sub> Sum | q-Value | p-Value | SgPgFn  | SgPg    | SgPgFn     | SgPg     |                                                       | -6                      | -4 | -2 | 0 | 2 | 4 | 6 |
| SGO_1693 | -0.542                 | 6.773                | 0.0397  | 0.0812  | 15.500  | 32.500  | 28.5848    | 33.9545  | fabG; 3-oxoacyl-(acyl-carrier-protein) reductase      |                         |    |    |   |   |   |   |
|          |                        |                      |         |         | 8.000   | 30.000  | 16.8207    | 30.0000  |                                                       |                         |    |    |   |   |   |   |
| SGO_1694 | -0.793                 | 6.806                | 0.0204  | 0.0291  | 14.000  | 30.000  | 25.8185    | 31.3426  | fabD; malonyl CoA-acyl carrier protein transacylase   |                         |    |    |   |   |   |   |
|          |                        |                      |         |         | 7.500   | 39.000  | 15.7695    | 39.0000  |                                                       |                         |    |    |   |   |   |   |
| SGO_1695 | -0.487                 | 9.411                | 0.0306  | 0.0534  | 88.500  | 212.000 | 163.2099   | 221.4875 | enoyl-acyl carrier protein(ACP) reductase             |                         |    |    |   |   |   |   |
|          |                        |                      |         |         | 57.500  | 175.000 | 120.8991   | 175.0000 |                                                       |                         |    |    |   |   |   |   |
| SGO_1699 | -0.663                 | 4.951                | 0.0888  | 0.2445  |         | 13.000  |            | 13.5818  | transcriptional regulator, MarR family                |                         |    |    |   |   |   |   |
|          |                        |                      |         |         | 3.500   | 10.000  | 7.3591     | 10.0000  |                                                       |                         |    |    |   |   |   |   |
| SGO_1700 | -1.291                 | 5.028                | 0.0264  | 0.0438  | 3.000   | 13.500  | 5.5325     | 14.1042  | enoyl-CoA hydratase/isomerase family protein          |                         |    |    |   |   |   |   |
|          |                        |                      |         |         |         | 13.000  |            | 13.0000  |                                                       |                         |    |    |   |   |   |   |
| SGO_1701 | -0.447                 | 7.468                | 0.0184  | 0.0246  | 17.500  | 49.000  | 32.2731    | 51.1929  | aspartate kinase                                      |                         |    |    |   |   |   |   |
|          |                        |                      |         |         | 20.500  | 50.500  | 43.1032    | 50.5000  |                                                       |                         |    |    |   |   |   |   |
| SGO_1708 | -0.248                 | 8.165                | 0.0330  | 0.0603  | 32.500  | 70.500  | 59.9358    | 73.6550  | amiF; Oligopeptide transport ATP-binding protein amiF |                         |    |    |   |   |   |   |
|          |                        |                      |         |         | 34.000  | 82.000  | 71.4882    | 82.0000  |                                                       |                         |    |    |   |   |   |   |
| SGO_1709 | -0.168                 | 8.469                | 0.1043  | 0.3029  | 39.000  | 83.500  | 71.9230    | 87.2368  | amiE; Oligopeptide transport ATP-binding protein      |                         |    |    |   |   |   |   |
|          |                        |                      |         |         | 45.500  | 99.500  | 95.6680    | 99.5000  |                                                       |                         |    |    |   |   |   |   |
| SGO_1710 | 0.468                  | 5.086                | 0.0227  | 0.0342  | 5.500   | 8.000   | 10.1430    | 8.3580   | amiD; Oligopeptide transport system permease protein  |                         |    |    |   |   |   |   |
|          |                        |                      |         |         | 4.500   | 6.000   | 9.4617     | 6.0000   |                                                       |                         |    |    |   |   |   |   |
| SGO_1711 | 0.231                  | 7.297                | 0.0594  | 0.1436  | 20.000  | 33.500  | 36.8836    | 34.9992  | hppB; Oligopeptide transport system permease          |                         |    |    |   |   |   |   |
|          |                        |                      |         |         | 23.000  | 37.000  | 48.3597    | 37.0000  |                                                       |                         |    |    |   |   |   |   |
| SGO_1712 | 0.242                  | 10.111               | 0.0051  | 0.0024  | 167.000 | 243.000 | 307.9781   | 253.8748 | hppA; oligopeptide-binding lipoprotein                |                         |    |    |   |   |   |   |
|          |                        |                      |         |         | 138.500 | 252.500 | 291.2092   | 252.5000 |                                                       |                         |    |    |   |   |   |   |
| SGO_1713 | 0.244                  | 9.467                | 0.0073  | 0.0050  | 101.500 | 160.000 | 187.1843   | 167.1604 | hppG; oligopeptide-binding lipoprotein                |                         |    |    |   |   |   |   |
|          |                        |                      |         |         | 93.500  | 157.000 | 196.5925   | 157.0000 |                                                       |                         |    |    |   |   |   |   |

- Show detected proteins only  
 Show all proteins

Proteins found:  
627

Filter by category:

ABC Transporter

Test

Cutoff

q-Value

.005

p-Value

|             | Signif | Direction | Applies To   |
|-------------|--------|-----------|--------------|
| Red         | yes    | +         | ratios, bars |
| Yellow      | no     | n/a       | bars         |
| Green       | yes    | -         | ratios, bars |
| Pink        | yes    | +         | p-, q-Values |
| Light Green | yes    | -         | p-, q-Values |

Dot Plots Dot Plots

Summary Table

SgFn vs Sg

SgPg vs Sg

SgPgFn vs Sg

SgPg vs SgFn

SgPgFn vs SgFn

SgPgFn vs SgPg

Coverage

SgPgFn vs SgPg

Raw

Normalized

Log<sub>2</sub> Ratios

| Protein  | SgPgFn vs SgPg         |                      |         |         | Raw    |         | Normalized |          | Description                                                     | Log <sub>2</sub> Ratios |    |    |   |   |   |
|----------|------------------------|----------------------|---------|---------|--------|---------|------------|----------|-----------------------------------------------------------------|-------------------------|----|----|---|---|---|
|          | Log <sub>2</sub> Ratio | Log <sub>2</sub> Sum | q-Value | p-Value | SgPgFn | SgPg    | SgPgFn     | SgPg     |                                                                 | -6                      | -4 | -2 | 0 | 2 | 4 |
| SGO_1715 | 0.004                  | 8.157                | 0.2404  | 0.9264  | 36.500 | 66.000  | 67.3126    | 68.9537  | hppH; oligopeptide-binding lipoprotein                          |                         |    |    |   |   |   |
|          |                        |                      |         |         | 36.000 | 73.500  | 75.6934    | 73.5000  |                                                                 |                         |    |    |   |   |   |
| SGO_1716 | 0.121                  | 8.584                | 0.1586  | 0.5254  | 70.500 | 90.000  | 130.0147   | 94.0277  | oligopeptide binding protein                                    |                         |    |    |   |   |   |
|          |                        |                      |         |         | 35.000 | 86.000  | 73.5908    | 86.0000  |                                                                 |                         |    |    |   |   |   |
| SGO_1718 | -0.288                 | 6.851                | 0.1156  | 0.3481  | 10.500 | 31.500  | 19.3639    | 32.9097  | sufB-1; FeS assembly protein SufB                               |                         |    |    |   |   |   |
|          |                        |                      |         |         | 16.000 | 29.500  | 33.6415    | 29.5000  |                                                                 |                         |    |    |   |   |   |
| SGO_1720 | -1.053                 | 5.634                | 0.0073  | 0.0051  | 5.500  | 15.500  | 10.1430    | 16.1937  | aminotransferase, class-V                                       |                         |    |    |   |   |   |
|          |                        |                      |         |         | 3.000  | 17.000  | 6.3078     | 17.0000  |                                                                 |                         |    |    |   |   |   |
| SGO_1721 | -0.178                 | 7.092                | 0.0300  | 0.0521  | 17.000 | 32.500  | 31.3511    | 33.9545  | sufD; FeS assembly protein SufD                                 |                         |    |    |   |   |   |
|          |                        |                      |         |         | 15.500 | 38.500  | 32.5902    | 38.5000  |                                                                 |                         |    |    |   |   |   |
| SGO_1722 | -0.328                 | 6.304                | 0.1360  | 0.4258  | 6.500  | 19.000  | 11.9872    | 19.8503  | sufC; FeS assembly ATPase SufC                                  |                         |    |    |   |   |   |
|          |                        |                      |         |         | 11.500 | 23.000  | 24.1798    | 23.0000  |                                                                 |                         |    |    |   |   |   |
| SGO_1727 | -0.089                 | 6.612                | 0.1273  | 0.3962  | 12.000 | 22.000  | 22.1302    | 22.9846  | amino acid ABC transporter, amino acid-binding/permease protein |                         |    |    |   |   |   |
|          |                        |                      |         |         | 12.000 | 27.500  | 25.2311    | 27.5000  |                                                                 |                         |    |    |   |   |   |
| SGO_1728 | 0.361                  | 6.099                | 0.0393  | 0.0781  | 10.500 | 17.000  | 19.3639    | 17.7608  | glnQ; glutamine ABC transporter ATP-binding protein             |                         |    |    |   |   |   |
|          |                        |                      |         |         | 9.000  | 12.500  | 18.9233    | 12.5000  |                                                                 |                         |    |    |   |   |   |
| SGO_1729 | -0.556                 | 6.362                | 0.0426  | 0.0903  | 11.500 | 20.500  | 21.2081    | 21.4174  | hypothetical protein SGO_1729                                   |                         |    |    |   |   |   |
|          |                        |                      |         |         | 6.000  | 27.000  | 12.6156    | 27.0000  |                                                                 |                         |    |    |   |   |   |
| SGO_1730 | 0.232                  | 8.334                | 0.0701  | 0.1788  | 45.000 | 60.500  | 82.9881    | 63.2075  | SPFH domain/Band 7 family                                       |                         |    |    |   |   |   |
|          |                        |                      |         |         | 43.000 | 86.000  | 90.4115    | 86.0000  |                                                                 |                         |    |    |   |   |   |
| SGO_1731 | -0.354                 | 5.984                | 0.0428  | 0.0909  | 7.000  | 14.500  | 12.9093    | 15.1489  | DNA-binding response regulator                                  |                         |    |    |   |   |   |
|          |                        |                      |         |         | 7.000  | 20.500  | 14.7182    | 20.5000  |                                                                 |                         |    |    |   |   |   |
| SGO_1735 | -0.312                 | 8.854                | 0.0071  | 0.0047  | 59.000 | 123.500 | 108.8066   | 129.0269 | hypothetical protein SGO_1735                                   |                         |    |    |   |   |   |
|          |                        |                      |         |         | 46.500 | 127.000 | 97.7706    | 127.0000 |                                                                 |                         |    |    |   |   |   |

 Show detected proteins only Show all proteinsProteins found:  
627 Filter by category:

ABC Transporter

Test

Cutoff

q-Value

p-Value

.005

|             | Signif | Direction | Applies To   |
|-------------|--------|-----------|--------------|
| Red         | yes    | +         | ratios, bars |
| Yellow      | no     | n/a       | bars         |
| Green       | yes    | -         | ratios, bars |
| Pink        | yes    | +         | p-, q-Values |
| Light Green | yes    | -         | p-, q-Values |

Dot Plots Dot Plots

Summary Table

SgFn vs Sg

SgPg vs Sg

SgPgFn vs Sg

SgPg vs SgFn

SgPgFn vs SgFn

SgPgFn vs SgPg

Coverage

SgPgFn vs SgPg

Raw

Normalized

Log<sub>2</sub> Ratios

| Protein  | SgPgFn vs SgPg         |                      |         |         | Raw     |          | Normalized |           | Description                                                 | Log <sub>2</sub> Ratios |    |    |   |   |   |   |
|----------|------------------------|----------------------|---------|---------|---------|----------|------------|-----------|-------------------------------------------------------------|-------------------------|----|----|---|---|---|---|
|          | Log <sub>2</sub> Ratio | Log <sub>2</sub> Sum | q-Value | p-Value | SgPgFn  | SgPg     | SgPgFn     | SgPg      |                                                             | -6                      | -4 | -2 | 0 | 2 | 4 | 6 |
| SGO_1736 | -1.070                 | 5.272                | 0.0656  | 0.1608  | 4.000   | 17.000   | 7.3767     | 17.7608   | alkaline shock protein                                      |                         |    |    |   |   |   |   |
|          |                        |                      |         |         |         | 13.500   |            | 13.5000   |                                                             |                         |    |    |   |   |   |   |
| SGO_1745 | 0.286                  | 12.325               | 0.0441  | 0.0943  | 665.500 | 1075.000 | 1227.3018  | 1123.1089 | fba; fructose-1,6-bisphosphate aldolase, class II           |                         |    |    |   |   |   |   |
|          |                        |                      |         |         | 762.000 | 1177.500 | 1602.1763  | 1177.5000 |                                                             |                         |    |    |   |   |   |   |
| SGO_1747 | 1.483                  | 3.270                | 0.0461  | 0.1009  | 3.000   | 2.500    | 5.5325     | 2.6119    | hypothetical protein SGO_1747                               |                         |    |    |   |   |   |   |
|          |                        |                      |         |         |         | 1.500    |            | 1.5000    |                                                             |                         |    |    |   |   |   |   |
| SGO_1748 | -0.504                 | 5.487                | 0.0660  | 0.1637  | 6.000   | 9.500    | 11.0651    | 9.9251    | pyrG; CTP synthase                                          |                         |    |    |   |   |   |   |
|          |                        |                      |         |         | 3.500   | 16.500   | 7.3591     | 16.5000   |                                                             |                         |    |    |   |   |   |   |
| SGO_1749 | -0.974                 | 6.290                | 0.0133  | 0.0144  | 8.000   | 21.000   | 14.7534    | 21.9398   | manA; mannose-6-phosphate isomerase, class I                |                         |    |    |   |   |   |   |
|          |                        |                      |         |         | 5.500   | 30.000   | 11.5643    | 30.0000   |                                                             |                         |    |    |   |   |   |   |
| SGO_1755 | -0.613                 | 7.025                | 0.0163  | 0.0196  | 13.000  | 42.500   | 23.9743    | 44.4020   | scrK; fructokinase                                          |                         |    |    |   |   |   |   |
|          |                        |                      |         |         | 13.000  | 34.500   | 27.3337    | 34.5000   |                                                             |                         |    |    |   |   |   |   |
| SGO_1757 | -0.650                 | 8.174                | 0.0050  | 0.0019  | 28.000  | 82.000   | 51.6370    | 85.6697   | glmS; glucosamine--fructose-6-phosphate aminotransferase    |                         |    |    |   |   |   |   |
|          |                        |                      |         |         | 29.000  | 90.500   | 60.9752    | 90.5000   |                                                             |                         |    |    |   |   |   |   |
| SGO_1763 | 0.094                  | 7.454                | 0.1393  | 0.4415  | 25.000  | 36.000   | 46.1045    | 37.6111   | ABC transporter, substrate-binding protein SP0092           |                         |    |    |   |   |   |   |
|          |                        |                      |         |         | 21.000  | 47.500   | 44.1545    | 47.5000   |                                                             |                         |    |    |   |   |   |   |
| SGO_1774 | 0.361                  | 5.406                | 0.0878  | 0.2411  | 5.000   | 10.500   | 9.2209     | 10.9699   | alcohol dehydrogenase, zinc-containing                      |                         |    |    |   |   |   |   |
|          |                        |                      |         |         | 7.000   | 7.500    | 14.7182    | 7.5000    |                                                             |                         |    |    |   |   |   |   |
| SGO_1784 | 0.226                  | 8.242                | 0.0100  | 0.0089  | 44.000  | 70.000   | 81.1439    | 73.1327   | leuS; leucyl-tRNA synthetase                                |                         |    |    |   |   |   |   |
|          |                        |                      |         |         | 39.000  | 66.500   | 82.0011    | 66.5000   |                                                             |                         |    |    |   |   |   |   |
| SGO_1799 | -0.270                 | 8.319                | 0.0358  | 0.0694  | 44.000  | 80.500   | 81.1439    | 84.1026   | endopeptidase O                                             |                         |    |    |   |   |   |   |
|          |                        |                      |         |         | 30.500  | 90.000   | 64.1291    | 90.0000   |                                                             |                         |    |    |   |   |   |   |
| SGO_1800 | -0.676                 | 6.165                | 0.0092  | 0.0071  | 6.500   | 22.000   | 11.9872    | 22.9846   | troB; manganese ABC transporter, ATP-binding protein SP1648 |                         |    |    |   |   |   |   |
|          |                        |                      |         |         | 7.500   | 21.000   | 15.7695    | 21.0000   |                                                             |                         |    |    |   |   |   |   |

- Show detected proteins only  
 Show all proteins

Proteins found:  
627

Filter by category:

ABC Transporter

Test

Cutoff

q-Value

.005

p-Value

|             | Signif | Direction | Applies To   |
|-------------|--------|-----------|--------------|
| Red         | yes    | +         | ratios, bars |
| Yellow      | no     | n/a       | bars         |
| Green       | yes    | -         | ratios, bars |
| Pink        | yes    | +         | p-, q-Values |
| Light Green | yes    | -         | p-, q-Values |

Dot Plots Dot Plots

Summary Table

SgFn vs Sg

SgPg vs Sg

SgPgFn vs Sg

SgPg vs SgFn

SgPgFn vs SgFn

SgPgFn vs SgPg

Coverage

SgPgFn vs SgPg

Raw

Normalized

Log<sub>2</sub> Ratios

| Protein  | SgPgFn vs SgPg         |                      |         |         | Raw    |         |         |          | Normalized |      |        |      | Description | Log <sub>2</sub> Ratios |    |    |   |   |   |   |
|----------|------------------------|----------------------|---------|---------|--------|---------|---------|----------|------------|------|--------|------|-------------|-------------------------|----|----|---|---|---|---|
|          | Log <sub>2</sub> Ratio | Log <sub>2</sub> Sum | q-Value | p-Value | SgPgFn | SgPg    | SgPgFn  | SgPg     | SgPgFn     | SgPg | SgPgFn | SgPg |             | -6                      | -4 | -2 | 0 | 2 | 4 | 6 |
| SGO_1802 | -0.634                 | 8.464                | 0.0272  | 0.0462  | 43.000 | 119.500 | 79.2997 | 124.8479 |            |      |        |      |             |                         |    |    |   |   |   |   |
|          |                        |                      |         |         | 28.000 | 90.000  | 58.8726 | 90.0000  |            |      |        |      |             |                         |    |    |   |   |   |   |
| SGO_1803 | -0.115                 | 6.871                | 0.1727  | 0.5975  | 12.500 | 29.500  | 23.0522 | 30.8202  |            |      |        |      |             |                         |    |    |   |   |   |   |
|          |                        |                      |         |         | 16.000 | 29.500  | 33.6415 | 29.5000  |            |      |        |      |             |                         |    |    |   |   |   |   |
| SGO_1805 | -1.458                 | 6.549                | 0.0146  | 0.0165  | 9.500  | 38.000  | 17.5197 | 39.7006  |            |      |        |      |             |                         |    |    |   |   |   |   |
|          |                        |                      |         |         | 4.000  | 28.000  | 8.4104  | 28.0000  |            |      |        |      |             |                         |    |    |   |   |   |   |
| SGO_1806 | -0.584                 | 5.473                | 0.0226  | 0.0335  | 4.000  | 11.500  | 7.3767  | 12.0147  |            |      |        |      |             |                         |    |    |   |   |   |   |
|          |                        |                      |         |         | 5.000  | 14.500  | 10.5130 | 14.5000  |            |      |        |      |             |                         |    |    |   |   |   |   |
| SGO_1808 | 1.477                  | 4.890                | 0.0163  | 0.0196  | 4.500  | 4.000   | 8.2988  | 4.1790   |            |      |        |      |             |                         |    |    |   |   |   |   |
|          |                        |                      |         |         | 6.500  | 3.500   | 13.6669 | 3.5000   |            |      |        |      |             |                         |    |    |   |   |   |   |
| SGO_1811 | -0.913                 | 4.325                | 0.0131  | 0.0141  |        | 7.500   |         | 7.8356   |            |      |        |      |             |                         |    |    |   |   |   |   |
|          |                        |                      |         |         | 2.000  | 8.000   | 4.2052  | 8.0000   |            |      |        |      |             |                         |    |    |   |   |   |   |
| SGO_1822 | -0.149                 | 4.569                | 0.0583  | 0.1398  | 4.000  | 8.000   | 7.3767  | 8.3580   |            |      |        |      |             |                         |    |    |   |   |   |   |
|          |                        |                      |         |         |        | 8.000   |         | 8.0000   |            |      |        |      |             |                         |    |    |   |   |   |   |
| SGO_1824 | -0.476                 | 5.675                | 0.0116  | 0.0115  | 6.500  | 14.000  | 11.9872 | 14.6265  |            |      |        |      |             |                         |    |    |   |   |   |   |
|          |                        |                      |         |         | 4.500  | 15.000  | 9.4617  | 15.0000  |            |      |        |      |             |                         |    |    |   |   |   |   |
| SGO_1828 | 0.472                  | 3.741                | 0.1647  | 0.5585  |        | 2.500   |         | 2.6119   |            |      |        |      |             |                         |    |    |   |   |   |   |
|          |                        |                      |         |         | 2.500  | 5.500   | 5.2565  | 5.5000   |            |      |        |      |             |                         |    |    |   |   |   |   |
| SGO_1834 | 0.489                  | 7.108                | 0.0493  | 0.1104  | 22.500 | 35.500  | 41.4940 | 37.0887  |            |      |        |      |             |                         |    |    |   |   |   |   |
|          |                        |                      |         |         | 18.000 | 21.500  | 37.8467 | 21.5000  |            |      |        |      |             |                         |    |    |   |   |   |   |
| SGO_1835 | 1.837                  | 4.414                | 0.0114  | 0.0111  |        | 3.500   |         | 3.6566   |            |      |        |      |             |                         |    |    |   |   |   |   |
|          |                        |                      |         |         | 6.500  | 4.000   | 13.6669 | 4.0000   |            |      |        |      |             |                         |    |    |   |   |   |   |
| SGO_1843 | -0.059                 | 7.934                | 0.1835  | 0.6466  | 29.500 | 67.000  | 54.4033 | 69.9984  |            |      |        |      |             |                         |    |    |   |   |   |   |
|          |                        |                      |         |         | 31.000 | 55.000  | 65.1804 | 55.0000  |            |      |        |      |             |                         |    |    |   |   |   |   |

- Show detected proteins only  
 Show all proteins

Proteins found:  
627

Filter by category:

ABC Transporter

Test

Cutoff

q-Value

p-Value

.005

|             | Signif | Direction | Applies To   |
|-------------|--------|-----------|--------------|
| Red         | yes    | +         | ratios, bars |
| Yellow      | no     | n/a       | bars         |
| Green       | yes    | -         | ratios, bars |
| Pink        | yes    | +         | p-, q-Values |
| Light Green | yes    | -         | p-, q-Values |

Dot Plots Dot Plots

Summary Table

SgFn vs Sg

SgPg vs Sg

SgPgFn vs Sg

SgPg vs SgFn

SgPgFn vs SgFn

SgPgFn vs SgPg

Coverage

SgPgFn vs SgPg

Raw

Normalized

Log<sub>2</sub> Ratios

| Protein  | SgPgFn vs SgPg         |                      |         |         | Raw    |        | Normalized |          | Description                                                 | Log <sub>2</sub> Ratios |    |    |   |   |   |   |
|----------|------------------------|----------------------|---------|---------|--------|--------|------------|----------|-------------------------------------------------------------|-------------------------|----|----|---|---|---|---|
|          | Log <sub>2</sub> Ratio | Log <sub>2</sub> Sum | q-Value | p-Value | SgPgFn | SgPg   | SgPgFn     | SgPg     |                                                             | -6                      | -4 | -2 | 0 | 2 | 4 | 6 |
| SGO_1844 | -1.041                 | 5.171                | 0.0100  | 0.0089  | 2.500  | 12.500 | 4.6104     | 13.0594  | cbxX/cfqX family protein                                    |                         |    |    |   |   |   |   |
|          |                        |                      |         |         | 3.500  | 11.000 | 7.3591     | 11.0000  |                                                             |                         |    |    |   |   |   |   |
| SGO_1847 | -0.863                 | 4.872                | 0.0339  | 0.0631  |        | 10.500 |            | 10.9699  | polC; DNA polymerase III, alpha subunit, Gram-positive type |                         |    |    |   |   |   |   |
|          |                        |                      |         |         | 3.000  | 12.000 | 6.3078     | 12.0000  |                                                             |                         |    |    |   |   |   |   |
| SGO_1848 | -0.036                 | 4.690                | 0.2404  | 0.9247  | 2.500  | 6.500  | 4.6104     | 6.7909   | lipoprotein, putative                                       |                         |    |    |   |   |   |   |
|          |                        |                      |         |         | 4.000  | 6.000  | 8.4104     | 6.0000   |                                                             |                         |    |    |   |   |   |   |
| SGO_1851 | -0.011                 | 8.612                | 0.2296  | 0.8672  | 55.500 | 99.500 | 102.3520   | 103.9529 | proS; prolyl-tRNA synthetase                                |                         |    |    |   |   |   |   |
|          |                        |                      |         |         | 44.000 | 92.500 | 92.5141    | 92.5000  |                                                             |                         |    |    |   |   |   |   |
| SGO_1852 | 0.033                  | 4.627                | 0.2454  | 0.9485  | 4.500  | 9.000  | 8.2988     | 9.4028   | membrane-associated zinc metalloprotease, putative          |                         |    |    |   |   |   |   |
|          |                        |                      |         |         |        | 7.000  |            | 7.0000   |                                                             |                         |    |    |   |   |   |   |
| SGO_1854 | 0.121                  | 5.798                | 0.1989  | 0.7144  | 6.000  | 16.000 | 11.0651    | 16.7160  | uppS; undecaprenyl diphosphate synthase                     |                         |    |    |   |   |   |   |
|          |                        |                      |         |         | 8.500  | 10.000 | 17.8720    | 10.0000  |                                                             |                         |    |    |   |   |   |   |
| SGO_1856 | 0.023                  | 5.751                | 0.2247  | 0.8416  | 8.500  | 14.000 | 15.6755    | 14.6265  | ATP-dependent proteinase ATP-binding chain                  |                         |    |    |   |   |   |   |
|          |                        |                      |         |         | 5.500  | 12.000 | 11.5643    | 12.0000  |                                                             |                         |    |    |   |   |   |   |
| SGO_1860 | -0.414                 | 7.507                | 0.0146  | 0.0165  | 19.500 | 53.000 | 35.9615    | 55.3719  | 5'-nucleotidase, lipoprotein e(P4) family                   |                         |    |    |   |   |   |   |
|          |                        |                      |         |         | 20.000 | 48.500 | 42.0519    | 48.5000  |                                                             |                         |    |    |   |   |   |   |
| SGO_1861 | -1.866                 | 4.710                | 0.0246  | 0.0386  |        | 11.500 |            | 12.0147  | nusB; transcription antitermination factor NusB             |                         |    |    |   |   |   |   |
|          |                        |                      |         |         | 1.500  | 11.000 | 3.1539     | 11.0000  |                                                             |                         |    |    |   |   |   |   |
| SGO_1862 | 0.067                  | 6.752                | 0.0956  | 0.2722  | 14.500 | 26.500 | 26.7406    | 27.6859  | alkaline shock protein                                      |                         |    |    |   |   |   |   |
|          |                        |                      |         |         | 13.500 | 25.000 | 28.3850    | 25.0000  |                                                             |                         |    |    |   |   |   |   |
| SGO_1863 | -0.035                 | 8.179                | 0.1094  | 0.3198  | 40.000 | 69.000 | 73.7672    | 72.0879  | efp; Elongation factor P (EF-P)                             |                         |    |    |   |   |   |   |
|          |                        |                      |         |         | 33.000 | 74.500 | 69.3856    | 74.5000  |                                                             |                         |    |    |   |   |   |   |
| SGO_1864 | -0.032                 | 7.000                | 0.2382  | 0.9116  | 22.500 | 30.000 | 41.4940    | 31.3426  | X-Pro aminopeptidase                                        |                         |    |    |   |   |   |   |
|          |                        |                      |         |         | 11.000 | 32.000 | 23.1285    | 32.0000  |                                                             |                         |    |    |   |   |   |   |

- Show detected proteins only  
 Show all proteins

Proteins found:  
627

Filter by category:

ABC Transporter

Test

Cutoff

q-Value

.005

p-Value

|             | Signif | Direction | Applies To   |
|-------------|--------|-----------|--------------|
| Red         | yes    | +         | ratios, bars |
| Yellow      | no     | n/a       | bars         |
| Green       | yes    | -         | ratios, bars |
| Pink        | yes    | +         | p-, q-Values |
| Light Green | yes    | -         | p-, q-Values |

Dot Plots Dot Plots

Summary Table

SgFn vs Sg

SgPg vs Sg

SgPgFn vs Sg

SgPg vs SgFn

SgPgFn vs SgFn

SgPgFn vs SgPg

Coverage

SgPgFn vs SgPg

Raw

Normalized

Log<sub>2</sub> Ratios

| Protein  | SgPgFn vs SgPg         |                      |         |         | Raw    |         |          |          | Normalized                                 |      |        |      | Description | Log <sub>2</sub> Ratios |    |    |   |   |   |   |
|----------|------------------------|----------------------|---------|---------|--------|---------|----------|----------|--------------------------------------------|------|--------|------|-------------|-------------------------|----|----|---|---|---|---|
|          | Log <sub>2</sub> Ratio | Log <sub>2</sub> Sum | q-Value | p-Value | SgPgFn | SgPg    | SgPgFn   | SgPg     | SgPgFn                                     | SgPg | SgPgFn | SgPg |             | -6                      | -4 | -2 | 0 | 2 | 4 | 6 |
| SGO_1865 | -0.582                 | 5.878                | 0.0007  | 0.0000  | 6.500  | 17.000  | 11.9872  | 17.7608  | uvrA; excinuclease ABC, A subunit          |      |        |      |             |                         |    |    |   |   |   |   |
|          |                        |                      |         |         | 5.500  | 17.500  | 11.5643  | 17.5000  |                                            |      |        |      |             |                         |    |    |   |   |   |   |
| SGO_1866 | 1.334                  | 3.687                |         |         | 5.000  | 3.500   | 9.2209   | 3.6566   | corA; magnesium and cobalt transporter     |      |        |      |             |                         |    |    |   |   |   |   |
|          |                        |                      |         |         |        |         |          |          |                                            |      |        |      |             |                         |    |    |   |   |   |   |
| SGO_1867 | 0.335                  | 7.252                | 0.0477  | 0.1060  | 27.000 | 31.500  | 49.7929  | 32.9097  | hypothetical protein SGO_1867              |      |        |      |             |                         |    |    |   |   |   |   |
|          |                        |                      |         |         | 17.000 | 34.000  | 35.7441  | 34.0000  |                                            |      |        |      |             |                         |    |    |   |   |   |   |
| SGO_1879 | 0.215                  | 7.603                | 0.0228  | 0.0348  | 27.500 | 46.000  | 50.7149  | 48.0586  | rpsR; ribosomal protein S18                |      |        |      |             |                         |    |    |   |   |   |   |
|          |                        |                      |         |         | 25.500 | 42.000  | 53.6161  | 42.0000  |                                            |      |        |      |             |                         |    |    |   |   |   |   |
| SGO_1880 | -0.388                 | 8.214                | 0.0069  | 0.0045  | 35.500 | 76.500  | 65.4684  | 79.9236  | ssb-1; single-strand binding protein       |      |        |      |             |                         |    |    |   |   |   |   |
|          |                        |                      |         |         | 30.000 | 88.500  | 63.0778  | 88.5000  |                                            |      |        |      |             |                         |    |    |   |   |   |   |
| SGO_1881 | -0.231                 | 9.505                | 0.0656  | 0.1618  | 95.500 | 214.000 | 176.1192 | 223.5770 | rpsF; ribosomal protein S6                 |      |        |      |             |                         |    |    |   |   |   |   |
|          |                        |                      |         |         | 74.500 | 170.000 | 156.6432 | 170.0000 |                                            |      |        |      |             |                         |    |    |   |   |   |   |
| SGO_1882 | -1.092                 | 5.641                | 0.0125  | 0.0131  | 4.000  | 13.500  | 7.3767   | 14.1042  | folE; GTP cyclohydrolase I                 |      |        |      |             |                         |    |    |   |   |   |   |
|          |                        |                      |         |         | 4.000  | 20.000  | 8.4104   | 20.0000  |                                            |      |        |      |             |                         |    |    |   |   |   |   |
| SGO_1885 | -0.214                 | 9.596                | 0.0050  | 0.0022  | 94.500 | 200.000 | 174.2750 | 208.9505 | groL; 60 kDa chaperonin/groEL protein      |      |        |      |             |                         |    |    |   |   |   |   |
|          |                        |                      |         |         | 87.500 | 206.500 | 183.9769 | 206.5000 |                                            |      |        |      |             |                         |    |    |   |   |   |   |
| SGO_1886 | -0.844                 | 5.401                | 0.0466  | 0.1028  | 3.000  | 17.000  | 5.5325   | 17.7608  | groES; chaperonin, 10 kDa                  |      |        |      |             |                         |    |    |   |   |   |   |
|          |                        |                      |         |         | 4.500  | 9.500   | 9.4617   | 9.5000   |                                            |      |        |      |             |                         |    |    |   |   |   |   |
| SGO_1892 | -0.259                 | 5.592                | 0.1219  | 0.3717  | 7.500  | 11.000  | 13.8313  | 11.4923  | PTS system, fructose(mannose)-specific IIB |      |        |      |             |                         |    |    |   |   |   |   |
|          |                        |                      |         |         | 4.000  | 14.500  | 8.4104   | 14.5000  |                                            |      |        |      |             |                         |    |    |   |   |   |   |
| SGO_1898 | -0.675                 | 7.534                | 0.0026  | 0.0006  | 20.500 | 53.500  | 37.8057  | 55.8943  | glutamyl aminopeptidase                    |      |        |      |             |                         |    |    |   |   |   |   |
|          |                        |                      |         |         | 16.000 | 58.000  | 33.6415  | 58.0000  |                                            |      |        |      |             |                         |    |    |   |   |   |   |
| SGO_1901 | -0.352                 | 6.462                | 0.0503  | 0.1141  | 10.000 | 28.000  | 18.4418  | 29.2531  | tRNA binding domain                        |      |        |      |             |                         |    |    |   |   |   |   |
|          |                        |                      |         |         | 9.500  | 20.500  | 19.9746  | 20.5000  |                                            |      |        |      |             |                         |    |    |   |   |   |   |

- Show detected proteins only  
 Show all proteins

Proteins found:  
627

Filter by category:

ABC Transporter

Test

Cutoff

q-Value

.005

p-Value

|             | Signif | Direction | Applies To   |
|-------------|--------|-----------|--------------|
| Red         | yes    | +         | ratios, bars |
| Yellow      | no     | n/a       | bars         |
| Green       | yes    | -         | ratios, bars |
| Pink        | yes    | +         | p-, q-Values |
| Light Green | yes    | -         | p-, q-Values |

Dot Plots Dot Plots

Summary Table

SgFn vs Sg

SgPg vs Sg

SgPgFn vs Sg

SgPg vs SgFn

SgPgFn vs SgFn

SgPgFn vs SgPg

Coverage

SgPgFn vs SgPg

Raw

Normalized

Log<sub>2</sub> Ratios

| Protein  | SgPgFn vs SgPg         |                      |         |         | Raw     |         | Normalized |          | Description                                              | Log <sub>2</sub> Ratios |    |    |   |   |   |   |
|----------|------------------------|----------------------|---------|---------|---------|---------|------------|----------|----------------------------------------------------------|-------------------------|----|----|---|---|---|---|
|          | Log <sub>2</sub> Ratio | Log <sub>2</sub> Sum | q-Value | p-Value | SgPgFn  | SgPg    | SgPgFn     | SgPg     |                                                          | -6                      | -4 | -2 | 0 | 2 | 4 | 6 |
| SGO_1902 | -0.339                 | 9.940                | 0.0402  | 0.0826  | 131.000 | 291.000 | 241.5876   | 304.0230 | ssb; single-stranded DNA-binding protein                 |                         |    |    |   |   |   |   |
|          |                        |                      |         |         | 91.500  | 244.500 | 192.3873   | 244.5000 |                                                          |                         |    |    |   |   |   |   |
| SGO_1903 | 0.056                  | 7.626                | 0.1705  | 0.5878  | 24.000  | 44.500  | 44.2603    | 46.4915  | ATP-dependent Zn protease                                |                         |    |    |   |   |   |   |
|          |                        |                      |         |         | 27.000  | 50.000  | 56.7700    | 50.0000  |                                                          |                         |    |    |   |   |   |   |
| SGO_1914 | 0.052                  | 3.628                | 0.2193  | 0.8139  |         | 3.500   |            | 3.6566   | folP; dihydropteroate synthase                           |                         |    |    |   |   |   |   |
|          |                        |                      |         |         | 2.000   | 4.500   | 4.2052     | 4.5000   |                                                          |                         |    |    |   |   |   |   |
| SGO_1916 | -0.106                 | 8.144                | 0.0163  | 0.0194  | 38.000  | 70.500  | 70.0788    | 73.6550  | ackA; acetate kinase                                     |                         |    |    |   |   |   |   |
|          |                        |                      |         |         | 31.500  | 73.000  | 66.2317    | 73.0000  |                                                          |                         |    |    |   |   |   |   |
| SGO_1917 | 0.042                  | 5.049                | 0.2247  | 0.8395  | 4.500   | 9.000   | 8.2988     | 9.4028   | hypothetical protein SGO_1917                            |                         |    |    |   |   |   |   |
|          |                        |                      |         |         | 4.000   | 7.000   | 8.4104     | 7.0000   |                                                          |                         |    |    |   |   |   |   |
| SGO_1924 | -0.471                 | 6.528                | 0.0494  | 0.1109  | 8.500   | 21.500  | 15.6755    | 22.4622  | comYA; competence protein comYA                          |                         |    |    |   |   |   |   |
|          |                        |                      |         |         | 11.000  | 31.000  | 23.1285    | 31.0000  |                                                          |                         |    |    |   |   |   |   |
| SGO_1926 | 0.039                  | 10.167               | 0.0956  | 0.2716  | 153.500 | 277.000 | 283.0816   | 289.3964 | rpoC; DNA-directed RNA polymerase, beta chain            |                         |    |    |   |   |   |   |
|          |                        |                      |         |         | 142.500 | 277.500 | 299.6196   | 277.5000 |                                                          |                         |    |    |   |   |   |   |
| SGO_1927 | 0.150                  | 9.994                | 0.0423  | 0.0883  | 135.500 | 228.000 | 249.8864   | 238.2036 | rpoB; DNA-directed RNA polymerase, beta subunit          |                         |    |    |   |   |   |   |
|          |                        |                      |         |         | 136.500 | 244.500 | 287.0040   | 244.5000 |                                                          |                         |    |    |   |   |   |   |
| SGO_1928 | -0.421                 | 4.347                | 0.0219  | 0.0317  | 3.000   | 7.000   | 5.5325     | 7.3133   | pbp1b; penicillin-binding protein 1B                     |                         |    |    |   |   |   |   |
|          |                        |                      |         |         |         | 7.500   |            | 7.5000   |                                                          |                         |    |    |   |   |   |   |
| SGO_1929 | -0.655                 | 9.026                | 0.0087  | 0.0065  | 50.500  | 164.500 | 93.1311    | 171.8618 | tyrS; tyrosyl-tRNA synthetase                            |                         |    |    |   |   |   |   |
|          |                        |                      |         |         | 52.000  | 147.000 | 109.3349   | 147.0000 |                                                          |                         |    |    |   |   |   |   |
| SGO_1936 | -0.550                 | 6.741                | 0.0107  | 0.0101  | 10.500  | 32.000  | 19.3639    | 33.4321  | adcA; metal-binding (Mn) permease precursor, lipoprotein |                         |    |    |   |   |   |   |
|          |                        |                      |         |         | 11.500  | 30.000  | 24.1798    | 30.0000  |                                                          |                         |    |    |   |   |   |   |
| SGO_1958 | -0.481                 | 10.205               | 0.0116  | 0.0114  | 122.500 | 350.000 | 225.9120   | 365.6633 | rplQ; ribosomal protein L17                              |                         |    |    |   |   |   |   |
|          |                        |                      |         |         | 127.000 | 321.500 | 267.0294   | 321.5000 |                                                          |                         |    |    |   |   |   |   |

 Show detected proteins only Show all proteinsProteins found:  
627 Filter by category:

ABC Transporter

Test

Cutoff

q-Value

.005

p-Value

|             | Signif | Direction | Applies To   |
|-------------|--------|-----------|--------------|
| Red         | yes    | +         | ratios, bars |
| Yellow      | no     | n/a       | bars         |
| Green       | yes    | -         | ratios, bars |
| Pink        | yes    | +         | p-, q-Values |
| Light Green | yes    | -         | p-, q-Values |

Dot Plots Dot Plots

Summary Table

SgFn vs Sg

SgPg vs Sg

SgPgFn vs Sg

SgPg vs SgFn

SgPgFn vs SgFn

SgPgFn vs SgPg

Coverage

SgPgFn vs SgPg

Raw

Normalized

Log<sub>2</sub> Ratios

| Protein  | SgPgFn vs SgPg         |                      |         |         | Raw     |         | Normalized |          | Description                                        | Log <sub>2</sub> Ratios |    |    |   |   |   |   |
|----------|------------------------|----------------------|---------|---------|---------|---------|------------|----------|----------------------------------------------------|-------------------------|----|----|---|---|---|---|
|          | Log <sub>2</sub> Ratio | Log <sub>2</sub> Sum | q-Value | p-Value | SgPgFn  | SgPg    | SgPgFn     | SgPg     |                                                    | -6                      | -4 | -2 | 0 | 2 | 4 | 6 |
| SGO_1959 | -0.145                 | 9.035                | 0.0322  | 0.0578  | 66.000  | 125.000 | 121.7159   | 130.5941 | rpoA; DNA-directed RNA polymerase, alpha subunit   |                         |    |    |   |   |   |   |
|          |                        |                      |         |         | 60.500  | 145.000 | 127.2069   | 145.0000 |                                                    |                         |    |    |   |   |   |   |
| SGO_1960 | 0.040                  | 7.986                | 0.1586  | 0.5270  | 36.000  | 56.500  | 66.3905    | 59.0285  | rpsK; ribosomal protein S11                        |                         |    |    |   |   |   |   |
|          |                        |                      |         |         | 29.500  | 66.000  | 62.0265    | 66.0000  |                                                    |                         |    |    |   |   |   |   |
| SGO_1961 | -1.119                 | 9.386                | 0.0026  | 0.0006  | 54.500  | 231.500 | 100.5078   | 241.8602 | rpsM; ribosomal protein S13p/S18e                  |                         |    |    |   |   |   |   |
|          |                        |                      |         |         | 52.500  | 216.500 | 110.3862   | 216.5000 |                                                    |                         |    |    |   |   |   |   |
| SGO_1962 | 0.805                  | 5.815                | 0.0818  | 0.2172  | 14.000  | 11.000  | 25.8185    | 11.4923  | rpmJ; ribosomal protein L36                        |                         |    |    |   |   |   |   |
|          |                        |                      |         |         |         | 19.000  |            | 19.0000  |                                                    |                         |    |    |   |   |   |   |
| SGO_1964 | 0.384                  | 8.500                | 0.0076  | 0.0054  | 52.500  | 75.500  | 96.8194    | 78.8788  | adk; Adenylate kinase (ATP-AMP transphosphorylase) |                         |    |    |   |   |   |   |
|          |                        |                      |         |         | 51.500  | 78.000  | 108.2836   | 78.0000  |                                                    |                         |    |    |   |   |   |   |
| SGO_1965 | 0.121                  | 5.444                | 0.0928  | 0.2595  | 6.000   | 9.000   | 11.0651    | 9.4028   | Preprotein translocase secY subunit                |                         |    |    |   |   |   |   |
|          |                        |                      |         |         | 5.500   | 11.500  | 11.5643    | 11.5000  |                                                    |                         |    |    |   |   |   |   |
| SGO_1966 | -0.081                 | 8.956                | 0.1835  | 0.6466  | 57.500  | 94.000  | 106.0403   | 98.2067  | rpLO; ribosomal protein L15                        |                         |    |    |   |   |   |   |
|          |                        |                      |         |         | 63.000  | 160.000 | 132.4634   | 160.0000 |                                                    |                         |    |    |   |   |   |   |
| SGO_1967 | -0.897                 | 8.463                | 0.0054  | 0.0028  | 29.500  | 116.000 | 54.4033    | 121.1913 | 50S ribosomal protein L30 -related protein         |                         |    |    |   |   |   |   |
|          |                        |                      |         |         | 33.000  | 108.000 | 69.3856    | 108.0000 |                                                    |                         |    |    |   |   |   |   |
| SGO_1968 | -0.439                 | 9.855                | 0.0048  | 0.0017  | 110.500 | 263.000 | 203.7819   | 274.7699 | rpsE; ribosomal protein S5                         |                         |    |    |   |   |   |   |
|          |                        |                      |         |         | 90.000  | 258.000 | 189.2334   | 258.0000 |                                                    |                         |    |    |   |   |   |   |
| SGO_1969 | 0.025                  | 10.151               | 0.0183  | 0.0240  | 156.500 | 270.500 | 288.6142   | 282.6055 | rplR; ribosomal protein L18                        |                         |    |    |   |   |   |   |
|          |                        |                      |         |         | 135.500 | 281.000 | 284.9014   | 281.0000 |                                                    |                         |    |    |   |   |   |   |
| SGO_1970 | 0.135                  | 9.595                | 0.1111  | 0.3304  | 126.500 | 178.500 | 233.2888   | 186.4883 | BL10; 50S ribosomal protein L6                     |                         |    |    |   |   |   |   |
|          |                        |                      |         |         | 82.500  | 180.000 | 173.4640   | 180.0000 |                                                    |                         |    |    |   |   |   |   |
| SGO_1971 | 0.393                  | 10.912               | 0.0327  | 0.0590  | 339.500 | 411.500 | 626.0991   | 429.9156 | rpsH; ribosomal protein S8                         |                         |    |    |   |   |   |   |
|          |                        |                      |         |         | 224.500 | 398.500 | 472.0323   | 398.5000 |                                                    |                         |    |    |   |   |   |   |

- Show detected proteins only  
 Show all proteins

Proteins found:  
627

Filter by category:

ABC Transporter

Test

Cutoff

q-Value

.005

p-Value

|             | Signif | Direction | Applies To   |
|-------------|--------|-----------|--------------|
| Red         | yes    | +         | ratios, bars |
| Yellow      | no     | n/a       | bars         |
| Green       | yes    | -         | ratios, bars |
| Pink        | yes    | +         | p-, q-Values |
| Light Green | yes    | -         | p-, q-Values |

Dot Plots Dot Plots



Summary Table

SgFn vs Sg

SgPg vs Sg

SgPgFn vs Sg

SgPg vs SgFn

SgPgFn vs SgFn

SgPgFn vs SgPg

Coverage

SgPgFn vs SgPg

Raw

Normalized

Log<sub>2</sub> Ratios

| Protein  | SgPgFn vs SgPg         |                      |         |         | Raw     |         | Normalized |          | Description                          | Log <sub>2</sub> Ratios |    |    |   |   |   |   |
|----------|------------------------|----------------------|---------|---------|---------|---------|------------|----------|--------------------------------------|-------------------------|----|----|---|---|---|---|
|          | Log <sub>2</sub> Ratio | Log <sub>2</sub> Sum | q-Value | p-Value | SgPgFn  | SgPg    | SgPgFn     | SgPg     |                                      | -6                      | -4 | -2 | 0 | 2 | 4 | 6 |
| SGO_1973 | 0.268                  | 9.741                | 0.0248  | 0.0399  | 137.500 | 189.500 | 253.5747   | 197.9806 | BL6; 50S ribosomal protein L5        |                         |    |    |   |   |   |   |
|          |                        |                      |         |         | 102.000 | 189.500 | 214.4645   | 189.5000 |                                      |                         |    |    |   |   |   |   |
| SGO_1974 | 0.831                  | 8.830                | 0.0071  | 0.0046  | 71.500  | 74.500  | 131.8589   | 77.8341  | rplX; ribosomal protein L24          |                         |    |    |   |   |   |   |
|          |                        |                      |         |         | 76.000  | 85.500  | 159.7971   | 85.5000  |                                      |                         |    |    |   |   |   |   |
| SGO_1975 | 0.553                  | 8.865                | 0.0092  | 0.0073  | 69.000  | 92.500  | 127.2484   | 96.6396  | rplN; ribosomal protein L14          |                         |    |    |   |   |   |   |
|          |                        |                      |         |         | 71.500  | 92.000  | 150.3354   | 92.0000  |                                      |                         |    |    |   |   |   |   |
| SGO_1976 | -0.862                 | 8.785                | 0.0140  | 0.0153  | 51.500  | 121.500 | 94.9753    | 126.9374 | BS16; 30S ribosomal protein          |                         |    |    |   |   |   |   |
|          |                        |                      |         |         | 30.000  | 156.000 | 63.0778    | 156.0000 |                                      |                         |    |    |   |   |   |   |
| SGO_1977 | 0.361                  | 6.208                | 0.0684  | 0.1734  | 9.000   | 13.500  | 16.5976    | 14.1042  | rpmC; ribosomal protein L29          |                         |    |    |   |   |   |   |
|          |                        |                      |         |         | 12.000  | 18.000  | 25.2311    | 18.0000  |                                      |                         |    |    |   |   |   |   |
| SGO_1978 | -0.529                 | 8.605                | 0.0007  | 0.0000  | 42.500  | 110.500 | 78.3776    | 115.4451 | rplP; ribosomal protein L16          |                         |    |    |   |   |   |   |
|          |                        |                      |         |         | 38.500  | 114.500 | 80.9499    | 114.5000 |                                      |                         |    |    |   |   |   |   |
| SGO_1979 | 0.134                  | 9.307                | 0.0661  | 0.1645  | 82.500  | 148.000 | 152.1448   | 154.6234 | rpsC; ribosomal protein S3           |                         |    |    |   |   |   |   |
|          |                        |                      |         |         | 85.500  | 147.000 | 179.7717   | 147.0000 |                                      |                         |    |    |   |   |   |   |
| SGO_1980 | 0.323                  | 9.561                | 0.0094  | 0.0076  | 108.000 | 164.000 | 199.1714   | 171.3394 | rplV; ribosomal protein L22          |                         |    |    |   |   |   |   |
|          |                        |                      |         |         | 105.000 | 164.000 | 220.7723   | 164.0000 |                                      |                         |    |    |   |   |   |   |
| SGO_1981 | 0.140                  | 8.873                | 0.0680  | 0.1722  | 62.000  | 100.000 | 114.3392   | 104.4752 | rpsS; ribosomal protein S19          |                         |    |    |   |   |   |   |
|          |                        |                      |         |         | 62.500  | 118.500 | 131.4121   | 118.5000 |                                      |                         |    |    |   |   |   |   |
| SGO_1982 | 0.235                  | 8.829                | 0.0419  | 0.0871  | 61.000  | 107.000 | 112.4950   | 111.7885 | rplB; ribosomal protein L2           |                         |    |    |   |   |   |   |
|          |                        |                      |         |         | 63.500  | 97.000  | 133.5147   | 97.0000  |                                      |                         |    |    |   |   |   |   |
| SGO_1983 | -0.007                 | 8.326                | 0.2399  | 0.9214  | 38.000  | 91.000  | 70.0788    | 95.0725  | rplW; ribosomal protein L23          |                         |    |    |   |   |   |   |
|          |                        |                      |         |         | 42.500  | 66.500  | 89.3602    | 66.5000  |                                      |                         |    |    |   |   |   |   |
| SGO_1984 | 0.622                  | 9.793                | 0.0066  | 0.0041  | 136.000 | 158.000 | 250.8085   | 165.0709 | rplD; ribosomal protein L4/L1 family |                         |    |    |   |   |   |   |
|          |                        |                      |         |         | 136.500 | 184.000 | 287.0040   | 184.0000 |                                      |                         |    |    |   |   |   |   |

- Show detected proteins only  
 Show all proteins

Proteins found:  
627

Filter by category:

ABC Transporter

Test

Cutoff

q-Value

p-Value

.005

|             | Signif | Direction | Applies To   |
|-------------|--------|-----------|--------------|
| Red         | yes    | +         | ratios, bars |
| Yellow      | no     | n/a       | bars         |
| Green       | yes    | -         | ratios, bars |
| Pink        | yes    | +         | p-, q-Values |
| Light Green | yes    | -         | p-, q-Values |

Dot Plots Dot Plots

Summary Table

SgFn vs Sg

SgPg vs Sg

SgPgFn vs Sg

SgPg vs SgFn

SgPgFn vs SgFn

SgPgFn vs SgPg

Coverage

SgPgFn vs SgPg

Raw

Normalized

Log<sub>2</sub> Ratios

| Protein  | SgPgFn vs SgPg         |                      |         |         | Raw     |         |          |          | Normalized |      |        |      | Description                                                      | Log <sub>2</sub> Ratios |      |    |    |    |   |   |   |   |
|----------|------------------------|----------------------|---------|---------|---------|---------|----------|----------|------------|------|--------|------|------------------------------------------------------------------|-------------------------|------|----|----|----|---|---|---|---|
|          | Log <sub>2</sub> Ratio | Log <sub>2</sub> Sum | q-Value | p-Value | SgPgFn  | SgPg    | SgPgFn   | SgPg     | SgPgFn     | SgPg | SgPgFn | SgPg |                                                                  | SgPgFn                  | SgPg | -6 | -4 | -2 | 0 | 2 | 4 | 6 |
| SGO_1985 | -0.307                 | 10.243               | 0.1025  | 0.2963  | 139.000 | 223.000 | 256.3410 | 232.9798 |            |      |        |      | rplC; ribosomal protein L3                                       |                         |      |    |    |    |   |   |   |   |
|          |                        |                      |         |         | 128.000 | 453.000 | 269.1320 | 453.0000 |            |      |        |      |                                                                  |                         |      |    |    |    |   |   |   |   |
| SGO_1986 | 0.546                  | 7.865                | 0.0050  | 0.0018  | 38.500  | 42.500  | 71.0009  | 44.4020  |            |      |        |      | rpsJ; ribosomal protein S10                                      |                         |      |    |    |    |   |   |   |   |
|          |                        |                      |         |         | 32.000  | 50.500  | 67.2830  | 50.5000  |            |      |        |      |                                                                  |                         |      |    |    |    |   |   |   |   |
| SGO_1989 | 0.019                  | 9.834                | 0.2083  | 0.7590  | 117.500 | 226.500 | 216.6911 | 236.6364 |            |      |        |      | purA; adenylosuccinate synthetase                                |                         |      |    |    |    |   |   |   |   |
|          |                        |                      |         |         | 115.500 | 216.500 | 242.8496 | 216.5000 |            |      |        |      |                                                                  |                         |      |    |    |    |   |   |   |   |
| SGO_1990 | -0.456                 | 4.657                | 0.1579  | 0.5196  | 3.500   | 6.000   | 6.4546   | 6.2685   |            |      |        |      | glutamate--cysteine ligase, putative/amino acid ligase, putative |                         |      |    |    |    |   |   |   |   |
|          |                        |                      |         |         |         | 12.500  |          | 12.5000  |            |      |        |      |                                                                  |                         |      |    |    |    |   |   |   |   |
| SGO_1993 | -0.205                 | 6.372                | 0.1151  | 0.3438  | 8.500   | 22.500  | 15.6755  | 23.5069  |            |      |        |      | possible transcriptional regulator                               |                         |      |    |    |    |   |   |   |   |
|          |                        |                      |         |         | 11.000  | 20.500  | 23.1285  | 20.5000  |            |      |        |      |                                                                  |                         |      |    |    |    |   |   |   |   |
| SGO_1998 | -0.844                 | 6.394                | 0.0172  | 0.0218  | 9.500   | 22.000  | 17.5197  | 22.9846  |            |      |        |      | clpB; ATP-dependent Clp proteinase, ATP-binding chain            |                         |      |    |    |    |   |   |   |   |
|          |                        |                      |         |         | 6.000   | 31.000  | 12.6156  | 31.0000  |            |      |        |      |                                                                  |                         |      |    |    |    |   |   |   |   |
| SGO_2000 | 0.015                  | 10.808               | 0.2122  | 0.7760  | 260.000 | 437.500 | 479.4868 | 457.0792 |            |      |        |      | tsf; translation elongation factor Ts                            |                         |      |    |    |    |   |   |   |   |
|          |                        |                      |         |         | 201.000 | 434.000 | 422.6213 | 434.0000 |            |      |        |      |                                                                  |                         |      |    |    |    |   |   |   |   |
| SGO_2001 | 0.089                  | 10.507               | 0.0813  | 0.2151  | 191.000 | 347.500 | 352.2384 | 363.0515 |            |      |        |      | rpsB; ribosomal protein S2                                       |                         |      |    |    |    |   |   |   |   |
|          |                        |                      |         |         | 189.500 | 341.500 | 398.4415 | 341.5000 |            |      |        |      |                                                                  |                         |      |    |    |    |   |   |   |   |
| SGO_2005 | 0.722                  | 5.492                | 0.0219  | 0.0321  | 9.000   | 7.500   | 16.5976  | 7.8356   |            |      |        |      | LPXTG cell wall surface protein                                  |                         |      |    |    |    |   |   |   |   |
|          |                        |                      |         |         | 5.500   | 9.000   | 11.5643  | 9.0000   |            |      |        |      |                                                                  |                         |      |    |    |    |   |   |   |   |
| SGO_2007 | 0.063                  | 6.694                | 0.1174  | 0.3566  | 15.000  | 25.500  | 27.6627  | 26.6412  |            |      |        |      | nusG; transcription termination/antitermination factor NusG      |                         |      |    |    |    |   |   |   |   |
|          |                        |                      |         |         | 12.000  | 24.000  | 25.2311  | 24.0000  |            |      |        |      |                                                                  |                         |      |    |    |    |   |   |   |   |
| SGO_2024 | -0.289                 | 5.777                | 0.0339  | 0.0630  | 6.000   | 13.500  | 11.0651  | 14.1042  |            |      |        |      | Extracellular polysaccharide biosynthesis                        |                         |      |    |    |    |   |   |   |   |
|          |                        |                      |         |         | 6.500   | 16.000  | 13.6669  | 16.0000  |            |      |        |      |                                                                  |                         |      |    |    |    |   |   |   |   |
| SGO_2025 | -1.332                 | 5.698                | 0.0123  | 0.0128  | 3.000   | 20.500  | 5.5325   | 21.4174  |            |      |        |      | wze; putative autophosphorylating protein tyrosine kinase        |                         |      |    |    |    |   |   |   |   |
|          |                        |                      |         |         | 4.500   | 15.500  | 9.4617   | 15.5000  |            |      |        |      |                                                                  |                         |      |    |    |    |   |   |   |   |

- Show detected proteins only  
 Show all proteins

Proteins found:  
627

Filter by category:

ABC Transporter

Test

Cutoff

q-Value

.005

p-Value

|             | Signif | Direction | Applies To   |
|-------------|--------|-----------|--------------|
| Red         | yes    | +         | ratios, bars |
| Yellow      | no     | n/a       | bars         |
| Green       | yes    | -         | ratios, bars |
| Pink        | yes    | +         | p-, q-Values |
| Light Green | yes    | -         | p-, q-Values |

Dot Plots Dot Plots

Summary Table

SgFn vs Sg

SgPg vs Sg

SgPgFn vs Sg

SgPg vs SgFn

SgPgFn vs SgFn

SgPgFn vs SgPg

Coverage

SgPgFn vs SgPg

Raw

Normalized

Log<sub>2</sub> Ratios

| Protein  | SgPgFn vs SgPg         |                      |         |         | Raw     |         | Normalized |          | Description                                                | Log <sub>2</sub> Ratios |    |    |   |   |
|----------|------------------------|----------------------|---------|---------|---------|---------|------------|----------|------------------------------------------------------------|-------------------------|----|----|---|---|
|          | Log <sub>2</sub> Ratio | Log <sub>2</sub> Sum | q-Value | p-Value | SgPgFn  | SgPg    | SgPgFn     | SgPg     |                                                            | -6                      | -4 | -2 | 0 | 2 |
| SGO_2033 | -0.425                 | 6.565                | 0.0099  | 0.0085  | 10.000  | 26.500  | 18.4418    | 27.6859  | nrdD; ribonucleoside-triphosphate reductase                |                         |    |    |   |   |
|          |                        |                      |         |         | 10.500  | 26.500  | 22.0772    | 26.5000  |                                                            |                         |    |    |   |   |
| SGO_2041 | -1.052                 | 4.251                | 0.0482  | 0.1073  | 2.000   | 8.000   | 3.6884     | 8.3580   | conserved hypothetical protein TIGR00250                   |                         |    |    |   |   |
|          |                        |                      |         |         |         | 7.000   |            | 7.0000   |                                                            |                         |    |    |   |   |
| SGO_2042 | 0.382                  | 8.928                | 0.0313  | 0.0550  | 83.500  | 92.500  | 153.9890   | 96.6396  | Bacterial protein of unknown function (DUF965) superfamily |                         |    |    |   |   |
|          |                        |                      |         |         | 58.000  | 114.500 | 121.9504   | 114.5000 |                                                            |                         |    |    |   |   |
| SGO_2045 | 0.083                  | 10.745               | 0.0818  | 0.2174  | 254.000 | 389.500 | 468.4217   | 406.9311 | recA; recA protein                                         |                         |    |    |   |   |
|          |                        |                      |         |         | 197.500 | 426.000 | 415.2622   | 426.0000 |                                                            |                         |    |    |   |   |
| SGO_2046 | -0.970                 | 4.841                | 0.0050  | 0.0022  | 3.000   | 9.500   | 5.5325     | 9.9251   | cinA; competence induced protein                           |                         |    |    |   |   |
|          |                        |                      |         |         | 2.000   | 9.000   | 4.2052     | 9.0000   |                                                            |                         |    |    |   |   |
| SGO_2053 | -0.100                 | 4.861                | 0.1661  | 0.5663  | 3.500   | 5.500   | 6.4546     | 5.7461   | DNA mismatch repair protein hexB                           |                         |    |    |   |   |
|          |                        |                      |         |         | 3.500   | 9.500   | 7.3591     | 9.5000   |                                                            |                         |    |    |   |   |
| SGO_2056 | -0.693                 | 5.734                | 0.0656  | 0.1610  | 3.500   | 12.500  | 6.4546     | 13.0594  | mutS; DNA mismatch repair protein MutS                     |                         |    |    |   |   |
|          |                        |                      |         |         | 7.000   | 19.000  | 14.7182    | 19.0000  |                                                            |                         |    |    |   |   |
| SGO_2058 | 0.379                  | 9.776                | 0.0103  | 0.0095  | 143.000 | 188.000 | 263.7177   | 196.4135 | argS; arginyl-tRNA synthetase                              |                         |    |    |   |   |
|          |                        |                      |         |         | 110.500 | 184.500 | 232.3366   | 184.5000 |                                                            |                         |    |    |   |   |
| SGO_2060 | -1.094                 | 7.569                | 0.0012  | 0.0001  | 17.500  | 61.500  | 32.2731    | 64.2523  | aspS-1; aspartyl-tRNA synthetase                           |                         |    |    |   |   |
|          |                        |                      |         |         | 13.500  | 65.000  | 28.3850    | 65.0000  |                                                            |                         |    |    |   |   |
| SGO_2062 | 0.193                  | 8.348                | 0.0506  | 0.1152  | 51.000  | 77.500  | 94.0532    | 80.9683  | hisS; histidyl-tRNA synthetase                             |                         |    |    |   |   |
|          |                        |                      |         |         | 38.000  | 71.000  | 79.8986    | 71.0000  |                                                            |                         |    |    |   |   |
| SGO_2064 | -0.242                 | 8.955                | 0.0271  | 0.0454  | 64.500  | 138.000 | 118.9496   | 144.1758 | ilvD; dihydroxy-acid dehydratase                           |                         |    |    |   |   |
|          |                        |                      |         |         | 51.500  | 125.000 | 108.2836   | 125.0000 |                                                            |                         |    |    |   |   |
| SGO_2066 | -0.337                 | 7.834                | 0.0466  | 0.1024  | 31.500  | 66.500  | 58.0917    | 69.4760  | rpmG; ribosomal protein L33                                |                         |    |    |   |   |
|          |                        |                      |         |         | 20.500  | 57.500  | 43.1032    | 57.5000  |                                                            |                         |    |    |   |   |

- Show detected proteins only  
 Show all proteins

Proteins found:  
627

Filter by category:

ABC Transporter

Test

Cutoff

q-Value

p-Value

.005

|             | Signif | Direction | Applies To   |
|-------------|--------|-----------|--------------|
| Red         | yes    | +         | ratios, bars |
| Yellow      | no     | n/a       | bars         |
| Green       | yes    | -         | ratios, bars |
| Pink        | yes    | +         | p-, q-Values |
| Light Green | yes    | -         | p-, q-Values |

Dot Plots Dot Plots

Summary Table

SgFn vs Sg

SgPg vs Sg

SgPgFn vs Sg

SgPg vs SgFn

SgPgFn vs SgFn

SgPgFn vs SgPg

Coverage

SgPgFn vs SgPg

Raw

Normalized

Log<sub>2</sub> Ratios

| Protein  | SgPgFn vs SgPg         |                      |         |         | Raw     |         | Normalized |          | Description                                 | Log <sub>2</sub> Ratios |    |    |   |   |   |   |
|----------|------------------------|----------------------|---------|---------|---------|---------|------------|----------|---------------------------------------------|-------------------------|----|----|---|---|---|---|
|          | Log <sub>2</sub> Ratio | Log <sub>2</sub> Sum | q-Value | p-Value | SgPgFn  | SgPg    | SgPgFn     | SgPg     |                                             | -6                      | -4 | -2 | 0 | 2 | 4 | 6 |
| SGO_2070 | -0.715                 | 5.430                | 0.0332  | 0.0611  | 5.500   | 15.000  | 10.1430    | 15.6713  | hypothetical protein SGO_2070               |                         |    |    |   |   |   |   |
|          |                        |                      |         |         | 3.000   | 11.000  | 6.3078     | 11.0000  |                                             |                         |    |    |   |   |   |   |
| SGO_2085 | 0.047                  | 7.648                | 0.0778  | 0.2038  | 28.500  | 48.000  | 52.5591    | 50.1481  | purB; adenylosuccinate lyase                |                         |    |    |   |   |   |   |
|          |                        |                      |         |         | 23.500  | 48.500  | 49.4109    | 48.5000  |                                             |                         |    |    |   |   |   |   |
| SGO_2097 | -1.055                 | 4.250                | 0.0195  | 0.0268  | 2.000   | 7.500   | 3.6884     | 7.8356   | comA; ATP-binding Transport protein ComA    |                         |    |    |   |   |   |   |
|          |                        |                      |         |         |         | 7.500   |            | 7.5000   |                                             |                         |    |    |   |   |   |   |
| SGO_2098 | -0.102                 | 11.049               | 0.1579  | 0.5181  | 319.500 | 519.500 | 589.2155   | 542.7489 | rpsD; ribosomal protein S4                  |                         |    |    |   |   |   |   |
|          |                        |                      |         |         | 208.500 | 548.500 | 438.3908   | 548.5000 |                                             |                         |    |    |   |   |   |   |
| SGO_2100 | 0.055                  | 9.145                | 0.1191  | 0.3624  | 76.500  | 140.500 | 141.0798   | 146.7877 | ABC transporter substrate-binding protein   |                         |    |    |   |   |   |   |
|          |                        |                      |         |         | 70.000  | 131.000 | 147.1815   | 131.0000 |                                             |                         |    |    |   |   |   |   |
| SGO_2102 | -1.959                 | 4.836                | 0.0805  | 0.2118  |         | 9.000   |            | 9.4028   | hypothetical protein SGO_2102               |                         |    |    |   |   |   |   |
|          |                        |                      |         |         | 1.500   | 16.000  | 3.1539     | 16.0000  |                                             |                         |    |    |   |   |   |   |
| SGO_2104 | 0.532                  | 8.288                | 0.0328  | 0.0594  | 59.000  | 55.000  | 108.8066   | 57.4614  | srtB; sortase B                             |                         |    |    |   |   |   |   |
|          |                        |                      |         |         | 36.500  | 69.500  | 76.7447    | 69.5000  |                                             |                         |    |    |   |   |   |   |
| SGO_2105 | 0.573                  | 6.179                | 0.0050  | 0.0019  | 11.500  | 15.000  | 21.2081    | 15.6713  | abpA; amylase-binding protein AbpA          |                         |    |    |   |   |   |   |
|          |                        |                      |         |         | 10.500  | 13.500  | 22.0772    | 13.5000  |                                             |                         |    |    |   |   |   |   |
| SGO_2106 | -0.167                 | 7.791                | 0.0396  | 0.0799  | 28.000  | 52.000  | 51.6370    | 54.3271  | ribose-phosphate diphosphokinase            |                         |    |    |   |   |   |   |
|          |                        |                      |         |         | 25.000  | 63.000  | 52.5648    | 63.0000  |                                             |                         |    |    |   |   |   |   |
| SGO_2133 | 0.155                  | 9.003                | 0.0195  | 0.0267  | 76.500  | 116.000 | 141.0798   | 121.1913 | Cell division protein ftsH-like protein     |                         |    |    |   |   |   |   |
|          |                        |                      |         |         | 61.500  | 121.500 | 129.3095   | 121.5000 |                                             |                         |    |    |   |   |   |   |
| SGO_2134 | -0.190                 | 7.151                | 0.1153  | 0.3458  | 21.500  | 37.500  | 39.6499    | 39.1782  | hpt; hypoxanthine phosphoribosyltransferase |                         |    |    |   |   |   |   |
|          |                        |                      |         |         | 13.000  | 36.000  | 27.3337    | 36.0000  |                                             |                         |    |    |   |   |   |   |
| SGO_2142 | -0.244                 | 8.063                | 0.0397  | 0.0812  | 30.000  | 73.500  | 55.3254    | 76.7893  | GTP-binding protein                         |                         |    |    |   |   |   |   |
|          |                        |                      |         |         | 32.000  | 68.000  | 67.2830    | 68.0000  |                                             |                         |    |    |   |   |   |   |

- Show detected proteins only  
 Show all proteins

Proteins found:  
627

Filter by category:

ABC Transporter

Test

Cutoff

q-Value

.005

p-Value

|             | Signif | Direction | Applies To   |
|-------------|--------|-----------|--------------|
| Red         | yes    | +         | ratios, bars |
| Yellow      | no     | n/a       | bars         |
| Green       | yes    | -         | ratios, bars |
| Pink        | yes    | +         | p-, q-Values |
| Light Green | yes    | -         | p-, q-Values |

Dot Plots Dot Plots

Summary Table

SgFn vs Sg

SgPg vs Sg

SgPgFn vs Sg

SgPg vs SgFn

SgPgFn vs SgFn

SgPgFn vs SgPg

Coverage

SgPgFn vs SgPg

Raw

Normalized

Log<sub>2</sub> Ratios

| Protein  | SgPgFn vs SgPg         |                      |         |         | Raw    |         |          |          | Normalized                                  |      |        |      | Description | Log <sub>2</sub> Ratios |    |    |   |   |   |   |
|----------|------------------------|----------------------|---------|---------|--------|---------|----------|----------|---------------------------------------------|------|--------|------|-------------|-------------------------|----|----|---|---|---|---|
|          | Log <sub>2</sub> Ratio | Log <sub>2</sub> Sum | q-Value | p-Value | SgPgFn | SgPg    | SgPgFn   | SgPg     | SgPgFn                                      | SgPg | SgPgFn | SgPg |             | -6                      | -4 | -2 | 0 | 2 | 4 | 6 |
| SGO_2145 | 0.001                  | 8.941                | 0.2492  | 0.9711  | 67.000 | 109.500 | 123.5601 | 114.4004 | comE; competence response regulator<br>ComE |      |        |      |             |                         |    |    |   |   |   |   |
|          |                        |                      |         |         | 58.000 | 131.500 | 121.9504 | 131.5000 |                                             |      |        |      |             |                         |    |    |   |   |   |   |
| SGO_2146 | -0.958                 | 4.948                | 0.0402  | 0.0827  |        | 12.500  |          | 13.0594  | comD; histidine protein kinase ComD         |      |        |      |             |                         |    |    |   |   |   |   |
|          |                        |                      |         |         | 3.000  | 11.500  | 6.3078   | 11.5000  |                                             |      |        |      |             |                         |    |    |   |   |   |   |
| SGO_2150 | -1.449                 | 6.392                | 0.0050  | 0.0020  | 8.000  | 29.500  | 14.7534  | 30.8202  | degP; serine protease                       |      |        |      |             |                         |    |    |   |   |   |   |
|          |                        |                      |         |         | 4.000  | 30.000  | 8.4104   | 30.0000  |                                             |      |        |      |             |                         |    |    |   |   |   |   |

- Show detected proteins only  
 Show all proteins

Proteins found:  
627

Filter by category:

ABC Transporter

Test

Cutoff

q-Value

.005

p-Value

|             | Signif | Direction | Applies To   |
|-------------|--------|-----------|--------------|
| Red         | yes    | +         | ratios, bars |
| Yellow      | no     | n/a       | bars         |
| Green       | yes    | -         | ratios, bars |
| Pink        | yes    | +         | p-, q-Values |
| Light Green | yes    | -         | p-, q-Values |

Dot Plots Dot Plots
