# Supplementary material for: Proteomics of Streptococcus gordonii within a model developing oral microbial community
Source: PubMed Central journal article supplement (PMC3534352; doi:10.1186/1471-2180-12-211), 2012-09-18
Supplement: 1471-2180-12-211-S8.pdf [file 1471-2180-12-211-S8.pdf]

Summary Table

SgFn vs Sg

SgPg vs Sg

SgPgFn vs Sg

SgPg vs SgFn

SgPgFn vs SgFn

SgPgFn vs SgPg

Coverage

| Protein  | Sg |          | SgFn |          | SgPg |          | SgPgFn |          | Description                                          | Sg    |        | SgFn  |        | SgPg  |        | SgPgFn |        |
|----------|----|----------|------|----------|------|----------|--------|----------|------------------------------------------------------|-------|--------|-------|--------|-------|--------|--------|--------|
|          | n  | Coverage | n    | Coverage | n    | Coverage | n      | Coverage |                                                      | Rep I | Rep II | Rep I | Rep II | Rep I | Rep II | Rep I  | Rep II |
| SGO_0001 | 16 | 48.2%    | 7    | 26.0%    | 9    | 33.3%    | 4      | 15.6%    | dnaA; chromosomal replication initiator protein DnaA |       |        |       |        |       |        |        |        |
|          | 24 | 57.3%    | 10   | 34.2%    | 9    | 32.9%    | 7      | 26.4%    |                                                      |       |        |       |        |       |        |        |        |
| SGO_0002 | 9  | 27.5%    | 7    | 24.9%    | 11   | 35.4%    | 4      | 11.9%    | dnaN; DNA polymerase III, beta subunit               |       |        |       |        |       |        |        |        |
|          | 10 | 30.7%    | 7    | 27.8%    | 11   | 33.3%    | 4      | 11.9%    |                                                      |       |        |       |        |       |        |        |        |
| SGO_0004 | 15 | 62.2%    | 11   | 51.7%    | 11   | 52.3%    | 8      | 43.6%    | putative lipoprotein                                 |       |        |       |        |       |        |        |        |
|          | 14 | 59.3%    | 9    | 35.5%    | 12   | 52.9%    | 9      | 41.3%    |                                                      |       |        |       |        |       |        |        |        |
| SGO_0005 | 8  | 10.9%    |      |          |      |          |        |          | hypothetical protein SGO_0005                        |       |        |       |        |       |        |        |        |
|          | 11 | 16.0%    |      |          |      |          |        |          |                                                      |       |        |       |        |       |        |        |        |
| SGO_0006 | 17 | 41.5%    | 17   | 44.8%    | 21   | 52.2%    | 10     | 26.7%    | ABC transporter, ATP-binding protein                 |       |        |       |        |       |        |        |        |
|          | 20 | 44.8%    | 15   | 43.5%    | 18   | 45.7%    | 9      | 26.7%    |                                                      |       |        |       |        |       |        |        |        |
| SGO_0007 | 8  | 34.7%    | 7    | 28.8%    | 9    | 34.4%    | 7      | 28.2%    | trpS; tryptophanyl-tRNA synthetase                   |       |        |       |        |       |        |        |        |
|          | 9  | 35.0%    | 7    | 29.7%    | 8    | 34.7%    | 5      | 20.6%    |                                                      |       |        |       |        |       |        |        |        |
| SGO_0008 | 23 | 54.8%    | 22   | 62.9%    | 30   | 77.7%    | 20     | 52.3%    | inosine-5'-monophosphate dehydrogenase               |       |        |       |        |       |        |        |        |
|          | 26 | 58.2%    | 26   | 64.5%    | 28   | 70.4%    | 20     | 57.0%    |                                                      |       |        |       |        |       |        |        |        |
| SGO_0011 | 7  | 22.7%    |      |          | 3    | 11.3%    | 8      | 25.1%    | proteinase, M16 family                               |       |        |       |        |       |        |        |        |
|          | 10 | 27.2%    | 5    | 17.6%    | 4    | 11.6%    | 4      | 13.7%    |                                                      |       |        |       |        |       |        |        |        |
| SGO_0012 |    |          | 3    | 13.7%    |      |          |        |          | mpp; peptidase, M16 family                           |       |        |       |        |       |        |        |        |
|          | 3  | 8.4%     | 4    | 17.2%    |      |          |        |          |                                                      |       |        |       |        |       |        |        |        |
| SGO_0013 | 4  | 18.1%    |      |          | 4    | 18.1%    |        |          | hypothetical protein SGO_0013                        |       |        |       |        |       |        |        |        |
|          | 5  | 21.0%    |      |          |      |          |        |          |                                                      |       |        |       |        |       |        |        |        |
| SGO_0015 | 8  | 41.6%    |      |          | 5    | 24.8%    |        |          | ABC transporter (ATP-binding protein)                |       |        |       |        |       |        |        |        |
|          | 9  | 42.3%    | 3    | 15.0%    | 6    | 33.6%    | 3      | 15.7%    |                                                      |       |        |       |        |       |        |        |        |
| SGO_0016 | 4  | 24.7%    |      |          | 4    | 24.0%    |        |          | cbiO; ABC transporter, ATP-binding protein           |       |        |       |        |       |        |        |        |
|          | 4  | 17.9%    |      |          | 4    | 16.8%    |        |          |                                                      |       |        |       |        |       |        |        |        |

Description

| Protein  | Sg |          | SgFn |          | SgPg |          | SgPgFn |          | Description                                          | Sg    |        | SgFn  |        | SgPg  |        | SgPgFn |        |
|----------|----|----------|------|----------|------|----------|--------|----------|------------------------------------------------------|-------|--------|-------|--------|-------|--------|--------|--------|
|          | n  | Coverage | n    | Coverage | n    | Coverage | n      | Coverage |                                                      | Rep I | Rep II | Rep I | Rep II | Rep I | Rep II | Rep I  | Rep II |
| SGO_0001 | 16 | 48.2%    | 7    | 26.0%    | 9    | 33.3%    | 4      | 15.6%    | dnaA; chromosomal replication initiator protein DnaA |       |        |       |        |       |        |        |        |
|          | 24 | 57.3%    | 10   | 34.2%    | 9    | 32.9%    | 7      | 26.4%    |                                                      |       |        |       |        |       |        |        |        |
| SGO_0002 | 9  | 27.5%    | 7    | 24.9%    | 11   | 35.4%    | 4      | 11.9%    | dnaN; DNA polymerase III, beta subunit               |       |        |       |        |       |        |        |        |
|          | 10 | 30.7%    | 7    | 27.8%    | 11   | 33.3%    | 4      | 11.9%    |                                                      |       |        |       |        |       |        |        |        |
| SGO_0004 | 15 | 62.2%    | 11   | 51.7%    | 11   | 52.3%    | 8      | 43.6%    | putative lipoprotein                                 |       |        |       |        |       |        |        |        |
|          | 14 | 59.3%    | 9    | 35.5%    | 12   | 52.9%    | 9      | 41.3%    |                                                      |       |        |       |        |       |        |        |        |
| SGO_0005 | 8  | 10.9%    |      |          |      |          |        |          | hypothetical protein SGO_0005                        |       |        |       |        |       |        |        |        |
|          | 11 | 16.0%    |      |          |      |          |        |          |                                                      |       |        |       |        |       |        |        |        |
| SGO_0006 | 17 | 41.5%    | 17   | 44.8%    | 21   | 52.2%    | 10     | 26.7%    | ABC transporter, ATP-binding protein                 |       |        |       |        |       |        |        |        |
|          | 20 | 44.8%    | 15   | 43.5%    | 18   | 45.7%    | 9      | 26.7%    |                                                      |       |        |       |        |       |        |        |        |
| SGO_0007 | 8  | 34.7%    | 7    | 28.8%    | 9    | 34.4%    | 7      | 28.2%    | trpS; tryptophanyl-tRNA synthetase                   |       |        |       |        |       |        |        |        |
|          | 9  | 35.0%    | 7    | 29.7%    | 8    | 34.7%    | 5      | 20.6%    |                                                      |       |        |       |        |       |        |        |        |
| SGO_0008 | 23 | 54.8%    | 22   | 62.9%    | 30   | 77.7%    | 20     | 52.3%    | inosine-5'-monophosphate dehydrogenase               |       |        |       |        |       |        |        |        |
|          | 26 | 58.2%    | 26   | 64.5%    | 28   | 70.4%    | 20     | 57.0%    |                                                      |       |        |       |        |       |        |        |        |
| SGO_0011 | 7  | 22.7%    |      |          | 3    | 11.3%    | 8      | 25.1%    | proteinase, M16 family                               |       |        |       |        |       |        |        |        |
|          | 10 | 27.2%    | 5    | 17.6%    | 4    | 11.6%    | 4      | 13.7%    |                                                      |       |        |       |        |       |        |        |        |
| SGO_0012 |    |          | 3    | 13.7%    |      |          |        |          | mpp; peptidase, M16 family                           |       |        |       |        |       |        |        |        |
|          | 3  | 8.4%     | 4    | 17.2%    |      |          |        |          |                                                      |       |        |       |        |       |        |        |        |
| SGO_0013 | 4  | 18.1%    |      |          | 4    | 18.1%    |        |          | hypothetical protein SGO_0013                        |       |        |       |        |       |        |        |        |
|          | 5  | 21.0%    |      |          |      |          |        |          |                                                      |       |        |       |        |       |        |        |        |
| SGO_0015 | 8  | 41.6%    |      |          | 5    | 24.8%    |        |          | ABC transporter (ATP-binding protein)                |       |        |       |        |       |        |        |        |
|          | 9  | 42.3%    | 3    | 15.0%    | 6    | 33.6%    | 3      | 15.7%    |                                                      |       |        |       |        |       |        |        |        |
| SGO_0016 | 4  | 24.7%    |      |          | 4    | 24.0%    |        |          | cbiO; ABC transporter, ATP-binding protein           |       |        |       |        |       |        |        |        |
|          | 4  | 17.9%    |      |          | 4    | 16.8%    |        |          |                                                      |       |        |       |        |       |        |        |        |

- Show detected proteins only  
 Show all proteins

 Filter by category:

 Proteins found:  
 1179

[Dot Plots](#) [Dot Plots](#)

Summary Table

SgFn vs Sg

SgPg vs Sg

SgPgFn vs Sg

SgPg vs SgFn

SgPgFn vs SgFn

SgPgFn vs SgPg

Coverage

| Protein  | <i>Sg</i> |          | <i>SgFn</i> |          | <i>SgPg</i> |          | <i>SgPgFn</i> |          | Description                                                        | <i>Sg</i> |        | <i>SgFn</i> |        | <i>SgPg</i> |        | <i>SgPgFn</i> |        |
|----------|-----------|----------|-------------|----------|-------------|----------|---------------|----------|--------------------------------------------------------------------|-----------|--------|-------------|--------|-------------|--------|---------------|--------|
|          | n         | Coverage | n           | Coverage | n           | Coverage | n             | Coverage |                                                                    | Rep I     | Rep II | Rep I       | Rep II | Rep I       | Rep II | Rep I         | Rep II |
| SGO_0017 | 4         | 12.5%    |             |          |             |          |               |          | ABC-type putative cobalt transport system, permease                |           |        |             |        |             |        |               |        |
|          | 4         | 13.3%    |             |          |             |          |               |          |                                                                    |           |        |             |        |             |        |               |        |
| SGO_0019 |           |          |             |          |             |          |               |          | sdhA; L-serine dehydratase, iron-sulfur-dependent, alpha subunit   |           |        |             |        |             |        |               |        |
|          | 6         | 24.1%    |             |          |             |          |               |          |                                                                    |           |        |             |        |             |        |               |        |
| SGO_0020 |           |          | 3           | 26.9%    |             |          |               |          | sdhB; L-serine dehydratase, iron-sulfur-dependent, beta subunit    |           |        |             |        |             |        |               |        |
|          | 3         | 19.7%    | 3           | 24.2%    |             |          |               |          |                                                                    |           |        |             |        |             |        |               |        |
| SGO_0022 | 6         | 20.4%    | 15          | 55.2%    | 8           | 28.4%    | 5             | 20.6%    | trmU; tRNA (5-methylaminomethyl-2-thiouridylate)-methyltransferase |           |        |             |        |             |        |               |        |
|          | 8         | 29.5%    | 15          | 56.3%    | 11          | 31.1%    | 3             | 15.0%    |                                                                    |           |        |             |        |             |        |               |        |
| SGO_0025 | 10        | 23.8%    | 4           | 9.5%     | 11          | 23.9%    | 4             | 8.1%     | gidA; glucose inhibited division protein A                         |           |        |             |        |             |        |               |        |
|          | 10        | 22.8%    | 6           | 13.8%    | 10          | 22.1%    | 7             | 14.9%    |                                                                    |           |        |             |        |             |        |               |        |
| SGO_0026 | 20        | 32.3%    |             |          | 4           | 9.1%     | 4             | 6.8%     | DHH subfamily 1 protein                                            |           |        |             |        |             |        |               |        |
|          | 21        | 33.1%    |             |          | 5           | 7.3%     |               |          |                                                                    |           |        |             |        |             |        |               |        |
| SGO_0027 | 7         | 54.7%    | 7           | 46.7%    | 8           | 63.3%    | 7             | 58.7%    | rplI; ribosomal protein L9                                         |           |        |             |        |             |        |               |        |
|          | 11        | 72.0%    | 9           | 64.0%    | 8           | 55.3%    | 8             | 52.7%    |                                                                    |           |        |             |        |             |        |               |        |
| SGO_0028 | 9         | 30.6%    | 4           | 11.8%    | 5           | 17.7%    |               |          | dnaC; replicative DNA helicase                                     |           |        |             |        |             |        |               |        |
|          | 13        | 41.9%    | 4           | 13.7%    | 7           | 27.5%    | 3             | 9.5%     |                                                                    |           |        |             |        |             |        |               |        |
| SGO_0030 | 12        | 47.3%    | 18          | 54.2%    | 15          | 57.7%    | 11            | 40.8%    | aspB; aspartate transaminase                                       |           |        |             |        |             |        |               |        |
|          | 13        | 46.1%    | 19          | 59.7%    | 14          | 49.9%    | 11            | 42.8%    |                                                                    |           |        |             |        |             |        |               |        |
| SGO_0032 | 11        | 36.9%    | 7           | 30.0%    | 12          | 44.1%    | 5             | 18.0%    | plsX; fatty acid/phospholipid synthesis protein PlsX               |           |        |             |        |             |        |               |        |
|          | 16        | 42.6%    | 7           | 27.9%    | 11          | 39.3%    | 4             | 11.1%    |                                                                    |           |        |             |        |             |        |               |        |
| SGO_0033 | 4         | 41.8%    |             |          | 3           | 40.5%    | 3             | 40.5%    | acpP; acyl carrier protein                                         |           |        |             |        |             |        |               |        |
|          | 6         | 57.0%    |             |          | 4           | 51.9%    | 4             | 51.9%    |                                                                    |           |        |             |        |             |        |               |        |
| SGO_0035 |           |          | 4           | 5.5%     |             |          |               |          | phosphoribosylformylglycinamide synthase                           |           |        |             |        |             |        |               |        |
|          | 3         | 3.6%     | 5           | 6.4%     | 3           | 4.2%     |               |          |                                                                    |           |        |             |        |             |        |               |        |

 Show detected proteins only Show all proteins Filter by category:

ABC Transporter

Proteins found:

1179

Dot Plots Dot Plots

Summary Table

SgFn vs Sg

SgPg vs Sg

SgPgFn vs Sg

SgPg vs SgFn

SgPgFn vs SgFn

SgPgFn vs SgPg

Coverage

| Protein  | <i>Sg</i> |          | <i>SgFn</i> |          | <i>SgPg</i> |          | <i>SgPgFn</i> |          | Description                          | <i>Sg</i> |        | <i>SgFn</i> |        | <i>SgPg</i> |        | <i>SgPgFn</i> |        |
|----------|-----------|----------|-------------|----------|-------------|----------|---------------|----------|--------------------------------------|-----------|--------|-------------|--------|-------------|--------|---------------|--------|
|          | n         | Coverage | n           | Coverage | n           | Coverage | n             | Coverage |                                      | Rep I     | Rep II | Rep I       | Rep II | Rep I       | Rep II | Rep I         | Rep II |
| SGO_0042 | 3         | 15.1%    | 6           | 43.3%    | 5           | 33.2%    | 3             | 17.6%    | transcription regulator, GntR family |           |        |             |        |             |        |               |        |
|          | 5         | 26.5%    | 5           | 35.3%    | 5           | 29.8%    |               |          |                                      |           |        |             |        |             |        |               |        |
| SGO_0044 |           |          |             |          |             |          |               |          | PTS system, IIB component            |           |        |             |        |             |        |               |        |
| SGO_0050 | 7         | 33.5%    |             |          |             |          |               |          | hypothetical protein SGO_0050        |           |        |             |        |             |        |               |        |
|          | 10        | 40.4%    |             |          |             |          |               |          |                                      |           |        |             |        |             |        |               |        |
| SGO_0051 | 3         | 16.1%    |             |          |             |          |               |          | hypothetical protein SGO_0051        |           |        |             |        |             |        |               |        |
|          | 4         | 28.6%    |             |          |             |          |               |          |                                      |           |        |             |        |             |        |               |        |
| SGO_0054 | 16        | 40.8%    | 13          | 36.3%    | 13          | 31.8%    | 6             | 20.9%    | dltA; D-alanine-activating enzyme    |           |        |             |        |             |        |               |        |
|          | 16        | 38.5%    | 13          | 37.7%    | 16          | 38.9%    | 7             | 20.3%    |                                      |           |        |             |        |             |        |               |        |
| SGO_0055 | 3         | 9.9%     |             |          |             |          |               |          | dltB; integral membrane protein      |           |        |             |        |             |        |               |        |
| SGO_0056 | 3         | 39.2%    | 3           | 31.6%    |             |          |               |          | dltC; D-alanyl carrier protein       |           |        |             |        |             |        |               |        |
|          | 4         | 36.7%    |             |          |             |          |               |          |                                      |           |        |             |        |             |        |               |        |
| SGO_0057 | 20        | 58.3%    | 14          | 48.8%    | 13          | 43.8%    | 7             | 25.4%    | dltD protein                         |           |        |             |        |             |        |               |        |
|          | 26        | 64.0%    | 9           | 32.9%    | 12          | 40.0%    | 6             | 19.9%    |                                      |           |        |             |        |             |        |               |        |
| SGO_0059 | 4         | 45.3%    | 4           | 45.3%    | 4           | 45.3%    | 4             | 45.3%    | pXO1; hypothetical protein SGO_0059  |           |        |             |        |             |        |               |        |
|          | 4         | 45.3%    | 4           | 45.3%    | 5           | 45.3%    | 5             | 45.3%    |                                      |           |        |             |        |             |        |               |        |
| SGO_0060 | 36        | 45.3%    |             |          |             |          |               |          | hypothetical protein SGO_0060        |           |        |             |        |             |        |               |        |
|          | 45        | 49.0%    | 3           | 5.0%     |             |          |               |          |                                      |           |        |             |        |             |        |               |        |
| SGO_0062 | 3         | 51.2%    |             |          |             |          |               |          | hypothetical protein SGO_0062        |           |        |             |        |             |        |               |        |
| SGO_0063 | 14        | 32.1%    | 4           | 10.8%    | 7           | 22.3%    | 5             | 14.4%    | hypothetical protein SGO_0063        |           |        |             |        |             |        |               |        |
|          | 17        | 42.9%    | 7           | 18.9%    | 9           | 27.3%    | 7             | 17.5%    |                                      |           |        |             |        |             |        |               |        |

 Show detected proteins only Show all proteins

Proteins found:

1179

 Filter by category:

ABC Transporter

Dot Plots Dot Plots

Summary Table

SgFn vs Sg

SgPg vs Sg

SgPgFn vs Sg

SgPg vs SgFn

SgPgFn vs SgFn

SgPgFn vs SgPg

Coverage

| Protein  | Sg |          | SgFn |          | SgPg |          | SgPgFn |          | Description                                  | Sg    |        | SgFn  |        | SgPg  |        | SgPgFn |        |
|----------|----|----------|------|----------|------|----------|--------|----------|----------------------------------------------|-------|--------|-------|--------|-------|--------|--------|--------|
|          | n  | Coverage | n    | Coverage | n    | Coverage | n      | Coverage |                                              | Rep I | Rep II | Rep I | Rep II | Rep I | Rep II | Rep I  | Rep II |
| SGO_0064 | 50 | 43.8%    | 9    | 8.5%     | 29   | 28.5%    | 14     | 13.6%    | FtsK/SpoIIIE family protein                  |       |        |       |        |       |        |        |        |
|          | 52 | 42.8%    | 11   | 11.8%    | 30   | 30.6%    | 17     | 16.4%    |                                              |       |        |       |        |       |        |        |        |
| SGO_0065 | 16 | 49.9%    | 9    | 33.7%    | 13   | 48.2%    | 10     | 35.9%    | hypothetical protein SGO_0065                |       |        |       |        |       |        |        |        |
|          | 18 | 50.4%    | 11   | 38.1%    | 15   | 56.2%    | 12     | 37.0%    |                                              |       |        |       |        |       |        |        |        |
| SGO_0066 |    |          | 3    | 36.6%    | 4    | 36.6%    | 3      | 36.6%    | D-3-phosphoglycerate dehydrogenase, putative |       |        |       |        |       |        |        |        |
|          |    |          |      |          | 5    | 58.4%    | 3      | 36.6%    |                                              |       |        |       |        |       |        |        |        |
| SGO_0067 | 8  | 25.7%    | 4    | 14.6%    | 13   | 37.3%    | 8      | 28.1%    | protein with prophage function domain        |       |        |       |        |       |        |        |        |
|          | 9  | 29.7%    | 5    | 17.1%    | 14   | 42.6%    | 6      | 20.0%    |                                              |       |        |       |        |       |        |        |        |
| SGO_0068 | 7  | 40.7%    |      |          | 7    | 40.7%    | 3      | 24.3%    | lipoprotein, putative                        |       |        |       |        |       |        |        |        |
|          | 7  | 40.7%    | 4    | 28.2%    | 6    | 40.1%    | 3      | 23.2%    |                                              |       |        |       |        |       |        |        |        |
| SGO_0069 | 5  | 38.6%    |      |          | 5    | 38.6%    | 3      | 25.5%    | hypothetical protein SGO_0069                |       |        |       |        |       |        |        |        |
|          | 7  | 45.7%    |      |          | 4    | 31.0%    | 4      | 31.0%    |                                              |       |        |       |        |       |        |        |        |
| SGO_0070 | 4  | 33.6%    |      |          | 4    | 34.3%    | 4      | 38.8%    | merozoite surface protein 1                  |       |        |       |        |       |        |        |        |
|          | 5  | 39.6%    |      |          | 4    | 34.3%    | 4      | 39.6%    |                                              |       |        |       |        |       |        |        |        |
| SGO_0075 | 4  | 23.6%    |      |          |      |          |        |          | hypothetical protein SGO_0075                |       |        |       |        |       |        |        |        |
| SGO_0078 | 7  | 38.2%    |      |          | 5    | 25.0%    |        |          | hypothetical protein SGO_0078                |       |        |       |        |       |        |        |        |
|          | 7  | 38.6%    | 3    | 20.9%    | 4    | 25.0%    |        |          |                                              |       |        |       |        |       |        |        |        |
| SGO_0079 | 3  | 27.6%    |      |          |      |          |        |          | hypothetical protein SGO_0079                |       |        |       |        |       |        |        |        |
| SGO_0080 | 17 | 38.7%    | 9    | 20.8%    | 14   | 31.8%    | 10     | 24.4%    | hypothetical protein SGO_0080                |       |        |       |        |       |        |        |        |
|          | 22 | 49.8%    | 7    | 18.0%    | 12   | 29.7%    | 10     | 23.3%    |                                              |       |        |       |        |       |        |        |        |
| SGO_0081 | 3  | 11.5%    | 5    | 21.6%    | 3    | 11.5%    |        |          | hypothetical protein SGO_0081                |       |        |       |        |       |        |        |        |
|          | 3  | 11.5%    | 4    | 13.3%    | 6    | 29.8%    |        |          |                                              |       |        |       |        |       |        |        |        |

 Show detected proteins only Show all proteins Filter by category:

ABC Transporter

Proteins found:

1179

Dot Plots Dot Plots



Summary Table

SgFn vs Sg

SgPg vs Sg

SgPgFn vs Sg

SgPg vs SgFn

SgPgFn vs SgFn

SgPgFn vs SgPg

Coverage

Sg

SgFn

SgPg

SgPgFn

Description

Sg

SgFn

SgPg

SgPgFn

Protein

n Coverage

n Coverage

n Coverage

n Coverage

Rep I Rep II

Rep I Rep II

Rep I Rep II

Rep I Rep II

| Protein  | Sg |          | SgFn |          | SgPg |          | SgPgFn |          | Description                                              | Sg    |        | SgFn  |        | SgPg  |        | SgPgFn |        |
|----------|----|----------|------|----------|------|----------|--------|----------|----------------------------------------------------------|-------|--------|-------|--------|-------|--------|--------|--------|
|          | n  | Coverage | n    | Coverage | n    | Coverage | n      | Coverage |                                                          | Rep I | Rep II | Rep I | Rep II | Rep I | Rep II | Rep I  | Rep II |
| SGO_0095 |    |          | 8    | 39.1%    | 8    | 38.8%    |        |          | mccF; microcin immunity protein MccF, putative           |       |        |       |        |       |        |        |        |
|          |    |          | 9    | 47.3%    | 6    | 34.4%    |        |          |                                                          |       |        |       |        |       |        |        |        |
| SGO_0097 | 3  | 12.4%    |      |          |      |          |        |          | hypothetical protein SGO_0097                            |       |        |       |        |       |        |        |        |
|          | 5  | 22.5%    |      |          |      |          |        |          |                                                          |       |        |       |        |       |        |        |        |
| SGO_0098 | 3  | 21.7%    |      |          | 3    | 21.7%    |        |          | ribonucleotide reductase-like protein                    |       |        |       |        |       |        |        |        |
|          |    |          |      |          | 3    | 21.7%    |        |          |                                                          |       |        |       |        |       |        |        |        |
| SGO_0099 |    |          | 4    | 11.3%    | 7    | 16.6%    | 3      | 5.6%     | pula-2; pullulanase, type I                              |       |        |       |        |       |        |        |        |
|          |    |          | 7    | 15.8%    | 6    | 16.6%    |        |          |                                                          |       |        |       |        |       |        |        |        |
| SGO_0100 | 6  | 27.4%    |      |          |      |          |        |          | maltose operon transcription repressor                   |       |        |       |        |       |        |        |        |
|          | 4  | 20.7%    | 4    | 21.6%    | 3    | 11.9%    |        |          |                                                          |       |        |       |        |       |        |        |        |
| SGO_0101 | 5  | 25.8%    |      |          |      |          |        |          | malA; Maltodextrose utilization protein malA             |       |        |       |        |       |        |        |        |
|          | 10 | 37.5%    |      |          |      |          |        |          |                                                          |       |        |       |        |       |        |        |        |
| SGO_0104 | 23 | 59.6%    | 19   | 56.8%    | 23   | 61.8%    | 20     | 57.7%    | Maltose/maltodextrin-binding protein precursor           |       |        |       |        |       |        |        |        |
|          | 26 | 65.1%    | 18   | 56.8%    | 23   | 61.8%    | 17     | 50.1%    |                                                          |       |        |       |        |       |        |        |        |
| SGO_0105 | 8  | 19.6%    | 8    | 24.6%    | 9    | 21.5%    | 4      | 9.1%     | malQ; 4-alpha-glucanotransferase                         |       |        |       |        |       |        |        |        |
|          | 9  | 19.8%    | 8    | 22.3%    | 9    | 21.7%    | 3      | 6.6%     |                                                          |       |        |       |        |       |        |        |        |
| SGO_0106 | 12 | 20.5%    | 27   | 49.1%    | 23   | 42.0%    | 17     | 31.9%    | glgP-2; maltodextrin phosphorylase                       |       |        |       |        |       |        |        |        |
|          | 15 | 22.7%    | 24   | 47.5%    | 28   | 51.1%    | 15     | 29.3%    |                                                          |       |        |       |        |       |        |        |        |
| SGO_0107 |    |          |      |          |      |          | 4      | 5.6%     | LPXTG cell wall surface protein, collagen binding domain |       |        |       |        |       |        |        |        |
| SGO_0108 | 8  | 30.7%    | 4    | 15.4%    |      |          |        |          | ruvB; Holliday junction DNA helicase RuvB                |       |        |       |        |       |        |        |        |
|          | 9  | 30.7%    | 3    | 13.9%    |      |          |        |          |                                                          |       |        |       |        |       |        |        |        |
| SGO_0110 |    |          |      |          | 3    | 40.7%    |        |          | phosphotyrosine protein phosphatase                      |       |        |       |        |       |        |        |        |
|          |    |          | 4    | 46.4%    |      |          |        |          |                                                          |       |        |       |        |       |        |        |        |

 Show detected proteins only Show all proteins Filter by category:

ABC Transporter

Proteins found:

1179

Dot Plots Dot Plots

Summary Table

SgFn vs Sg

SgPg vs Sg

SgPgFn vs Sg

SgPg vs SgFn

SgPgFn vs SgFn

SgPgFn vs SgPg

Coverage

Sg

SgFn

SgPg

SgPgFn

Description

Sg

SgFn

SgPg

SgPgFn

| Protein  | Sg |          | SgFn |          | SgPg |          | SgPgFn |          | Description                               | Sg    |        | SgFn  |        | SgPg  |        | SgPgFn |        |
|----------|----|----------|------|----------|------|----------|--------|----------|-------------------------------------------|-------|--------|-------|--------|-------|--------|--------|--------|
|          | n  | Coverage | n    | Coverage | n    | Coverage | n      | Coverage |                                           | Rep I | Rep II | Rep I | Rep II | Rep I | Rep II | Rep I  | Rep II |
| SGO_0111 | 4  | 27.0%    |      |          |      |          |        |          | MORN motif family protein                 |       |        |       |        |       |        |        |        |
|          | 6  | 36.5%    |      |          |      |          |        |          |                                           |       |        |       |        |       |        |        |        |
| SGO_0112 | 10 | 22.0%    |      |          |      |          |        |          | putative acyltransferase                  |       |        |       |        |       |        |        |        |
|          | 9  | 22.2%    |      |          |      |          |        |          |                                           |       |        |       |        |       |        |        |        |
| SGO_0113 | 53 | 63.8%    | 53   | 66.8%    | 47   | 60.5%    | 45     | 59.1%    | acdH; alcohol-acetaldehyde dehydrogenase  |       |        |       |        |       |        |        |        |
|          | 57 | 66.0%    | 51   | 76.3%    | 48   | 60.9%    | 45     | 60.2%    |                                           |       |        |       |        |       |        |        |        |
| SGO_0128 |    |          |      |          |      |          |        |          | hypothetical protein SGO_0128             |       |        |       |        |       |        |        |        |
|          | 5  | 60.7%    |      |          |      |          |        |          |                                           |       |        |       |        |       |        |        |        |
| SGO_0129 | 13 | 29.2%    |      |          | 4    | 11.1%    |        |          | atpI; v-type sodium ATP synthase, chain I |       |        |       |        |       |        |        |        |
|          | 16 | 31.6%    |      |          | 4    | 8.8%     |        |          |                                           |       |        |       |        |       |        |        |        |
| SGO_0131 | 6  | 34.7%    | 3    | 27.6%    |      |          |        |          | v-type sodium ATP synthase, chain E       |       |        |       |        |       |        |        |        |
|          | 6  | 35.2%    | 4    | 29.1%    |      |          |        |          |                                           |       |        |       |        |       |        |        |        |
| SGO_0132 |    |          |      |          | 3    | 12.8%    |        |          | ATP synthase (C/AC39) subunit             |       |        |       |        |       |        |        |        |
|          | 3  | 13.1%    |      |          | 4    | 15.4%    |        |          |                                           |       |        |       |        |       |        |        |        |
| SGO_0134 | 6  | 27.3%    |      |          | 6    | 26.4%    |        |          | acetyltransferase, GNAT family            |       |        |       |        |       |        |        |        |
|          | 8  | 39.0%    | 4    | 17.7%    | 7    | 35.1%    |        |          |                                           |       |        |       |        |       |        |        |        |
| SGO_0135 | 22 | 49.0%    | 16   | 34.9%    | 13   | 28.4%    | 8      | 16.1%    | v-type sodium ATP synthase, subunit A     |       |        |       |        |       |        |        |        |
|          | 24 | 49.5%    | 10   | 23.3%    | 18   | 48.5%    | 9      | 20.0%    |                                           |       |        |       |        |       |        |        |        |
| SGO_0136 | 22 | 54.7%    | 16   | 48.9%    | 12   | 43.5%    | 10     | 36.2%    | v-type sodium ATP synthase, chain B       |       |        |       |        |       |        |        |        |
|          | 22 | 54.5%    | 14   | 44.6%    | 13   | 45.9%    | 10     | 36.2%    |                                           |       |        |       |        |       |        |        |        |
| SGO_0137 | 3  | 16.4%    |      |          |      |          |        |          | V-type ATPase, D subunit                  |       |        |       |        |       |        |        |        |
|          | 4  | 15.5%    |      |          |      |          |        |          |                                           |       |        |       |        |       |        |        |        |
| SGO_0138 |    |          |      |          |      |          |        |          | LysM domain protein                       |       |        |       |        |       |        |        |        |
|          | 4  | 17.7%    | 5    | 22.0%    |      |          |        |          |                                           |       |        |       |        |       |        |        |        |

 Show detected proteins only Show all proteins Filter by category:

ABC Transporter

Proteins found:

1179

Dot Plots Dot Plots

Summary Table

SgFn vs Sg

SgPg vs Sg

SgPgFn vs Sg

SgPg vs SgFn

SgPgFn vs SgFn

SgPgFn vs SgPg

Coverage

| Protein  | Sg |          | SgFn |          | SgPg |          | SgPgFn |          | Description                          | Sg    |        | SgFn  |        | SgPg  |        | SgPgFn |        |
|----------|----|----------|------|----------|------|----------|--------|----------|--------------------------------------|-------|--------|-------|--------|-------|--------|--------|--------|
|          | n  | Coverage | n    | Coverage | n    | Coverage | n      | Coverage |                                      | Rep I | Rep II | Rep I | Rep II | Rep I | Rep II | Rep I  | Rep II |
| SGO_0139 | 11 | 37.0%    | 14   | 44.9%    | 12   | 43.5%    | 10     | 30.0%    | thrC; threonine synthase             |       |        |       |        |       |        |        |        |
|          | 12 | 38.3%    | 11   | 35.8%    | 13   | 42.9%    | 6      | 19.8%    |                                      |       |        |       |        |       |        |        |        |
| SGO_0142 | 3  | 15.5%    |      |          |      |          |        |          | hypothetical protein SGO_0142        |       |        |       |        |       |        |        |        |
|          |    |          |      |          |      |          |        |          |                                      |       |        |       |        |       |        |        |        |
| SGO_0144 | 14 | 15.6%    | 4    | 4.2%     | 3    | 1.9%     |        |          | hypothetical protein SGO_0144        |       |        |       |        |       |        |        |        |
|          | 18 | 18.1%    | 3    | 3.1%     |      |          |        |          |                                      |       |        |       |        |       |        |        |        |
| SGO_0145 | 31 | 45.3%    | 25   | 41.1%    | 21   | 34.8%    | 11     | 19.9%    | polI; DNA polymerase I               |       |        |       |        |       |        |        |        |
|          | 25 | 37.6%    | 21   | 34.7%    | 22   | 38.1%    | 11     | 22.0%    |                                      |       |        |       |        |       |        |        |        |
| SGO_0146 | 5  | 41.4%    | 7    | 58.6%    | 7    | 58.6%    | 5      | 41.4%    | CoA-binding domain protein           |       |        |       |        |       |        |        |        |
|          | 6  | 46.2%    | 7    | 66.9%    | 5    | 46.2%    | 3      | 23.4%    |                                      |       |        |       |        |       |        |        |        |
| SGO_0148 | 5  | 33.3%    |      |          | 3    | 21.1%    |        |          | hypothetical protein SGO_0148        |       |        |       |        |       |        |        |        |
|          | 7  | 38.2%    |      |          |      |          |        |          |                                      |       |        |       |        |       |        |        |        |
| SGO_0150 | 3  | 10.0%    |      |          |      |          |        |          | fucA1; alpha-L-fucosidase            |       |        |       |        |       |        |        |        |
| SGO_0152 | 4  | 21.1%    | 6    | 31.3%    | 5    | 27.4%    | 3      | 17.9%    | tgt; queuine tRNA-ribosyltransferase |       |        |       |        |       |        |        |        |
|          | 4  | 21.1%    | 4    | 17.4%    | 7    | 36.3%    | 4      | 19.7%    |                                      |       |        |       |        |       |        |        |        |
| SGO_0154 | 16 | 47.9%    | 32   | 71.3%    | 26   | 63.3%    | 18     | 53.9%    | pgi; glucose-6-phosphate isomerase   |       |        |       |        |       |        |        |        |
|          | 21 | 48.6%    | 33   | 74.6%    | 23   | 61.0%    | 20     | 54.8%    |                                      |       |        |       |        |       |        |        |        |
| SGO_0155 | 15 | 52.6%    |      |          | 3    | 16.6%    |        |          | hypothetical protein SGO_0155        |       |        |       |        |       |        |        |        |
|          | 15 | 57.0%    |      |          | 5    | 16.6%    |        |          |                                      |       |        |       |        |       |        |        |        |
| SGO_0156 | 9  | 41.0%    |      |          | 3    | 16.4%    | 3      | 16.4%    | hypothetical protein SGO_0156        |       |        |       |        |       |        |        |        |
|          | 11 | 42.5%    |      |          | 3    | 16.4%    | 3      | 17.2%    |                                      |       |        |       |        |       |        |        |        |
| SGO_0157 | 4  | 16.8%    |      |          |      |          |        |          | hypothetical protein SGO_0157        |       |        |       |        |       |        |        |        |
|          | 5  | 20.6%    |      |          |      |          |        |          |                                      |       |        |       |        |       |        |        |        |

- Show detected proteins only
- Show all proteins

Proteins found:  
1179

Filter by category:

ABC Transporter

Dot Plots Dot Plots

Summary Table

SgFn vs Sg

SgPg vs Sg

SgPgFn vs Sg

SgPg vs SgFn

SgPgFn vs SgFn

SgPgFn vs SgPg

Coverage

| Protein  | Sg |          | SgFn |          | SgPg |          | SgPgFn |          | Description                                                                                         | Sg    |        | SgFn  |        | SgPg  |        | SgPgFn |        |
|----------|----|----------|------|----------|------|----------|--------|----------|-----------------------------------------------------------------------------------------------------|-------|--------|-------|--------|-------|--------|--------|--------|
|          | n  | Coverage | n    | Coverage | n    | Coverage | n      | Coverage |                                                                                                     | Rep I | Rep II | Rep I | Rep II | Rep I | Rep II | Rep I  | Rep II |
| SGO_0158 | 8  | 42.2%    | 7    | 38.8%    | 7    | 41.4%    | 6      | 37.9%    | 2,3,4,5-tetrahydropyridine-2-carboxylate N-succinyltransferase, putative                            |       |        |       |        |       |        |        |        |
|          | 8  | 42.2%    | 6    | 34.9%    | 8    | 41.4%    | 8      | 45.3%    |                                                                                                     |       |        |       |        |       |        |        |        |
| SGO_0159 |    |          | 3    | 10.6%    | 3    | 10.6%    |        |          | hippurate hydrolase                                                                                 |       |        |       |        |       |        |        |        |
|          | 5  | 19.9%    |      |          |      |          |        |          |                                                                                                     |       |        |       |        |       |        |        |        |
| SGO_0163 | 7  | 36.4%    | 11   | 48.3%    | 10   | 45.4%    | 6      | 29.1%    | galU; UTP-glucose-1-phosphate uridylyltransferase                                                   |       |        |       |        |       |        |        |        |
|          | 8  | 40.1%    | 10   | 48.7%    | 9    | 41.7%    | 8      | 40.7%    |                                                                                                     |       |        |       |        |       |        |        |        |
| SGO_0164 | 12 | 55.9%    | 14   | 69.2%    | 11   | 56.2%    | 8      | 38.2%    | Glycerol-3-phosphate dehydrogenase [NAD(P)+] (NAD(P)H-dependent glycerol-3-phosphate dehydrogenase) |       |        |       |        |       |        |        |        |
|          | 13 | 61.5%    | 12   | 60.7%    | 11   | 58.6%    | 9      | 41.1%    |                                                                                                     |       |        |       |        |       |        |        |        |
| SGO_0165 | 9  | 22.3%    |      |          |      |          |        |          | ABC transporter, permease/ATP-binding protein SP2075                                                |       |        |       |        |       |        |        |        |
|          | 8  | 17.8%    |      |          |      |          |        |          |                                                                                                     |       |        |       |        |       |        |        |        |
| SGO_0166 | 11 | 26.5%    |      |          |      |          |        |          | ABC transporter, permease/ATP-binding protein SP2073                                                |       |        |       |        |       |        |        |        |
|          | 10 | 25.1%    |      |          | 3    | 3.7%     |        |          |                                                                                                     |       |        |       |        |       |        |        |        |
| SGO_0167 | 5  | 27.1%    |      |          |      |          |        |          | glutamine amidotransferase                                                                          |       |        |       |        |       |        |        |        |
|          | 5  | 32.3%    |      |          |      |          |        |          |                                                                                                     |       |        |       |        |       |        |        |        |
| SGO_0168 | 4  | 30.2%    |      |          |      |          |        |          | hydrolase, NUDIX family                                                                             |       |        |       |        |       |        |        |        |
|          | 5  | 39.6%    | 3    | 22.8%    |      |          |        |          |                                                                                                     |       |        |       |        |       |        |        |        |
| SGO_0169 | 5  | 41.5%    | 5    | 42.9%    | 4    | 42.9%    | 5      | 42.9%    | dut; dUTP diphosphatase                                                                             |       |        |       |        |       |        |        |        |
|          | 5  | 52.4%    | 4    | 28.6%    | 4    | 44.2%    | 4      | 37.4%    |                                                                                                     |       |        |       |        |       |        |        |        |
| SGO_0171 | 7  | 21.7%    | 5    | 20.2%    | 9    | 31.8%    | 3      | 11.4%    | radA; DNA repair protein RadA                                                                       |       |        |       |        |       |        |        |        |
|          | 12 | 40.1%    |      |          | 10   | 35.0%    |        |          |                                                                                                     |       |        |       |        |       |        |        |        |
| SGO_0172 | 7  | 44.1%    | 3    | 25.4%    |      |          |        |          | conserved hypothetical protein TIGR00266                                                            |       |        |       |        |       |        |        |        |
|          | 7  | 44.5%    |      |          |      |          |        |          |                                                                                                     |       |        |       |        |       |        |        |        |
| SGO_0173 | 7  | 56.7%    | 3    | 34.1%    | 4    | 36.0%    |        |          | Carbonic anhydrase                                                                                  |       |        |       |        |       |        |        |        |
|          | 7  | 56.7%    | 5    | 50.0%    | 4    | 37.2%    |        |          |                                                                                                     |       |        |       |        |       |        |        |        |

 Show detected proteins only Show all proteins Filter by category:

ABC Transporter

Proteins found:

1179

Dot Plots Dot Plots

Summary Table

SgFn vs Sg

SgPg vs Sg

SgPgFn vs Sg

SgPg vs SgFn

SgPgFn vs SgFn

SgPgFn vs SgPg

Coverage

| Protein  | Sg |          | SgFn |          | SgPg |          | SgPgFn |          | Description                                         | Sg    |        | SgFn  |        | SgPg  |        | SgPgFn |        |
|----------|----|----------|------|----------|------|----------|--------|----------|-----------------------------------------------------|-------|--------|-------|--------|-------|--------|--------|--------|
|          | n  | Coverage | n    | Coverage | n    | Coverage | n      | Coverage |                                                     | Rep I | Rep II | Rep I | Rep II | Rep I | Rep II | Rep I  | Rep II |
| SGO_0174 | 22 | 52.2%    | 19   | 45.4%    | 27   | 57.9%    | 17     | 44.9%    | gltX; glutamyl-tRNA synthetase                      |       |        |       |        |       |        |        |        |
|          | 22 | 53.2%    | 23   | 54.8%    | 23   | 56.9%    | 18     | 47.4%    |                                                     |       |        |       |        |       |        |        |        |
| SGO_0179 |    |          |      |          |      |          |        |          | Membrane protein oxaA 1 precursor                   |       |        |       |        |       |        |        |        |
|          | 3  | 7.0%     |      |          |      |          |        |          |                                                     |       |        |       |        |       |        |        |        |
| SGO_0180 | 11 | 34.1%    | 7    | 30.9%    | 8    | 30.9%    | 3      | 10.3%    | jag; hypothetical protein SGO_0180                  |       |        |       |        |       |        |        |        |
|          | 13 | 38.4%    | 4    | 19.7%    | 7    | 25.3%    | 8      | 28.1%    |                                                     |       |        |       |        |       |        |        |        |
| SGO_0181 | 12 | 40.4%    |      |          |      |          |        |          | lipoprotein, putative                               |       |        |       |        |       |        |        |        |
|          | 15 | 55.1%    |      |          |      |          |        |          |                                                     |       |        |       |        |       |        |        |        |
| SGO_0182 |    |          | 3    | 20.5%    |      |          |        |          | sapR; sakacin A production response regulator       |       |        |       |        |       |        |        |        |
|          | 3  | 21.0%    | 4    | 32.4%    |      |          |        |          |                                                     |       |        |       |        |       |        |        |        |
| SGO_0188 | 5  | 20.7%    | 6    | 35.9%    |      |          |        |          | hydrolase, TatD family                              |       |        |       |        |       |        |        |        |
|          | 6  | 27.0%    | 3    | 17.6%    | 3    | 14.5%    |        |          |                                                     |       |        |       |        |       |        |        |        |
| SGO_0189 |    |          |      |          |      |          |        |          | primase-related protein                             |       |        |       |        |       |        |        |        |
|          | 3  | 20.4%    |      |          |      |          |        |          |                                                     |       |        |       |        |       |        |        |        |
| SGO_0190 | 9  | 34.2%    |      |          | 3    | 15.8%    |        |          | hypothetical protein SGO_0190                       |       |        |       |        |       |        |        |        |
|          | 16 | 51.8%    |      |          | 4    | 20.1%    | 3      | 15.5%    |                                                     |       |        |       |        |       |        |        |        |
| SGO_0191 | 7  | 17.8%    |      |          | 4    | 14.9%    |        |          | hypothetical protein SGO_0191                       |       |        |       |        |       |        |        |        |
|          | 9  | 27.0%    |      |          |      |          |        |          |                                                     |       |        |       |        |       |        |        |        |
| SGO_0193 | 3  | 14.1%    | 3    | 12.8%    | 7    | 32.8%    |        |          | ksgA; dimethyladenosine transferase                 |       |        |       |        |       |        |        |        |
|          | 5  | 20.7%    | 4    | 17.9%    | 6    | 24.5%    |        |          |                                                     |       |        |       |        |       |        |        |        |
| SGO_0197 |    |          | 4    | 25.7%    | 3    | 20.2%    |        |          | predicted ribosome small subunit-dependent GTPase A |       |        |       |        |       |        |        |        |
|          |    |          | 6    | 39.7%    | 5    | 37.3%    | 3      | 17.8%    |                                                     |       |        |       |        |       |        |        |        |
| SGO_0198 | 8  | 51.1%    | 10   | 71.2%    | 10   | 65.3%    | 7      | 35.6%    | rpe; ribulose-phosphate 3-epimerase                 |       |        |       |        |       |        |        |        |
|          | 7  | 37.9%    | 10   | 74.4%    | 9    | 58.9%    | 5      | 29.7%    |                                                     |       |        |       |        |       |        |        |        |

 Show detected proteins only Show all proteins Filter by category:

ABC Transporter

Proteins found:

1179

Dot Plots Dot Plots

Summary Table

SgFn vs Sg

SgPg vs Sg

SgPgFn vs Sg

SgPg vs SgFn

SgPgFn vs SgFn

SgPgFn vs SgPg

Coverage

| Protein  | Sg |          | SgFn |          | SgPg |          | SgPgFn |          | Description                                                | Sg    |        | SgFn  |        | SgPg  |        | SgPgFn |        |
|----------|----|----------|------|----------|------|----------|--------|----------|------------------------------------------------------------|-------|--------|-------|--------|-------|--------|--------|--------|
|          | n  | Coverage | n    | Coverage | n    | Coverage | n      | Coverage |                                                            | Rep I | Rep II | Rep I | Rep II | Rep I | Rep II | Rep I  | Rep II |
| SGO_0200 | 15 | 42.6%    | 10   | 38.8%    | 12   | 45.0%    | 5      | 20.3%    | competence-induced protein Ccs50                           |       |        |       |        |       |        |        |        |
|          | 21 | 51.9%    | 9    | 38.3%    | 11   | 45.2%    | 7      | 30.9%    |                                                            |       |        |       |        |       |        |        |        |
| SGO_0201 | 10 | 46.3%    | 12   | 48.2%    | 11   | 47.9%    | 6      | 26.2%    | cmp-binding-factor 1                                       |       |        |       |        |       |        |        |        |
|          | 12 | 51.1%    | 13   | 49.2%    | 13   | 52.1%    | 7      | 26.8%    |                                                            |       |        |       |        |       |        |        |        |
| SGO_0202 | 3  | 20.3%    | 5    | 33.6%    | 4    | 25.5%    |        |          | pur operon repressor                                       |       |        |       |        |       |        |        |        |
|          | 4  | 25.8%    | 5    | 32.1%    | 5    | 33.2%    |        |          |                                                            |       |        |       |        |       |        |        |        |
| SGO_0203 |    |          |      |          |      |          |        |          | hypothetical protein SGO_0203                              |       |        |       |        |       |        |        |        |
|          | 4  | 27.9%    |      |          |      |          |        |          |                                                            |       |        |       |        |       |        |        |        |
| SGO_0204 | 7  | 25.5%    | 8    | 45.3%    | 7    | 39.4%    | 8      | 45.3%    | rpsL; ribosomal protein S12                                |       |        |       |        |       |        |        |        |
|          | 7  | 25.5%    | 6    | 43.8%    | 7    | 39.4%    | 8      | 45.3%    |                                                            |       |        |       |        |       |        |        |        |
| SGO_0205 | 12 | 67.3%    | 11   | 62.8%    | 11   | 59.6%    | 9      | 60.3%    | rpsG; ribosomal protein S7                                 |       |        |       |        |       |        |        |        |
|          | 14 | 74.4%    | 13   | 80.1%    | 10   | 59.0%    | 10     | 53.8%    |                                                            |       |        |       |        |       |        |        |        |
| SGO_0206 | 41 | 83.5%    | 38   | 79.2%    | 42   | 83.5%    | 38     | 77.5%    | fusA; translation elongation factor G                      |       |        |       |        |       |        |        |        |
|          | 46 | 86.0%    | 44   | 97.4%    | 45   | 83.8%    | 38     | 79.8%    |                                                            |       |        |       |        |       |        |        |        |
| SGO_0207 | 14 | 47.9%    | 25   | 69.3%    | 19   | 62.2%    | 16     | 58.6%    | gap; glyceraldehyde-3-phosphate dehydrogenase, type I      |       |        |       |        |       |        |        |        |
|          | 15 | 50.6%    | 27   | 91.1%    | 18   | 59.5%    | 18     | 58.9%    |                                                            |       |        |       |        |       |        |        |        |
| SGO_0208 | 12 | 9.7%     | 13   | 11.3%    |      |          |        |          | LPXTG cell wall surface protein, glycosyl hydrolase family |       |        |       |        |       |        |        |        |
|          | 16 | 14.3%    | 12   | 9.9%     |      |          |        |          |                                                            |       |        |       |        |       |        |        |        |
| SGO_0209 | 26 | 72.2%    | 29   | 76.7%    | 27   | 81.5%    | 26     | 80.5%    | pgk; phosphoglycerate kinase                               |       |        |       |        |       |        |        |        |
|          | 29 | 72.9%    | 29   | 87.2%    | 28   | 82.5%    | 24     | 72.2%    |                                                            |       |        |       |        |       |        |        |        |
| SGO_0210 | 17 | 14.3%    | 20   | 21.1%    | 3    | 2.1%     |        |          | sspA; streptococcal surface protein A                      |       |        |       |        |       |        |        |        |
|          | 28 | 20.6%    | 15   | 18.4%    | 4    | 4.3%     |        |          |                                                            |       |        |       |        |       |        |        |        |
| SGO_0211 | 20 | 13.4%    | 4    | 3.0%     |      |          |        |          | sspB; streptococcal surface protein B                      |       |        |       |        |       |        |        |        |
|          | 18 | 13.2%    | 5    | 4.5%     |      |          |        |          |                                                            |       |        |       |        |       |        |        |        |

Description

| Protein  | Sg |          | SgFn |          | SgPg |          | SgPgFn |          | Description                                                | Sg    |        | SgFn  |        | SgPg  |        | SgPgFn |        |
|----------|----|----------|------|----------|------|----------|--------|----------|------------------------------------------------------------|-------|--------|-------|--------|-------|--------|--------|--------|
|          | n  | Coverage | n    | Coverage | n    | Coverage | n      | Coverage |                                                            | Rep I | Rep II | Rep I | Rep II | Rep I | Rep II | Rep I  | Rep II |
| SGO_0200 | 15 | 42.6%    | 10   | 38.8%    | 12   | 45.0%    | 5      | 20.3%    | competence-induced protein Ccs50                           |       |        |       |        |       |        |        |        |
|          | 21 | 51.9%    | 9    | 38.3%    | 11   | 45.2%    | 7      | 30.9%    |                                                            |       |        |       |        |       |        |        |        |
| SGO_0201 | 10 | 46.3%    | 12   | 48.2%    | 11   | 47.9%    | 6      | 26.2%    | cmp-binding-factor 1                                       |       |        |       |        |       |        |        |        |
|          | 12 | 51.1%    | 13   | 49.2%    | 13   | 52.1%    | 7      | 26.8%    |                                                            |       |        |       |        |       |        |        |        |
| SGO_0202 | 3  | 20.3%    | 5    | 33.6%    | 4    | 25.5%    |        |          | pur operon repressor                                       |       |        |       |        |       |        |        |        |
|          | 4  | 25.8%    | 5    | 32.1%    | 5    | 33.2%    |        |          |                                                            |       |        |       |        |       |        |        |        |
| SGO_0203 |    |          |      |          |      |          |        |          | hypothetical protein SGO_0203                              |       |        |       |        |       |        |        |        |
|          | 4  | 27.9%    |      |          |      |          |        |          |                                                            |       |        |       |        |       |        |        |        |
| SGO_0204 | 7  | 25.5%    | 8    | 45.3%    | 7    | 39.4%    | 8      | 45.3%    | rpsL; ribosomal protein S12                                |       |        |       |        |       |        |        |        |
|          | 7  | 25.5%    | 6    | 43.8%    | 7    | 39.4%    | 8      | 45.3%    |                                                            |       |        |       |        |       |        |        |        |
| SGO_0205 | 12 | 67.3%    | 11   | 62.8%    | 11   | 59.6%    | 9      | 60.3%    | rpsG; ribosomal protein S7                                 |       |        |       |        |       |        |        |        |
|          | 14 | 74.4%    | 13   | 80.1%    | 10   | 59.0%    | 10     | 53.8%    |                                                            |       |        |       |        |       |        |        |        |
| SGO_0206 | 41 | 83.5%    | 38   | 79.2%    | 42   | 83.5%    | 38     | 77.5%    | fusA; translation elongation factor G                      |       |        |       |        |       |        |        |        |
|          | 46 | 86.0%    | 44   | 97.4%    | 45   | 83.8%    | 38     | 79.8%    |                                                            |       |        |       |        |       |        |        |        |
| SGO_0207 | 14 | 47.9%    | 25   | 69.3%    | 19   | 62.2%    | 16     | 58.6%    | gap; glyceraldehyde-3-phosphate dehydrogenase, type I      |       |        |       |        |       |        |        |        |
|          | 15 | 50.6%    | 27   | 91.1%    | 18   | 59.5%    | 18     | 58.9%    |                                                            |       |        |       |        |       |        |        |        |
| SGO_0208 | 12 | 9.7%     | 13   | 11.3%    |      |          |        |          | LPXTG cell wall surface protein, glycosyl hydrolase family |       |        |       |        |       |        |        |        |
|          | 16 | 14.3%    | 12   | 9.9%     |      |          |        |          |                                                            |       |        |       |        |       |        |        |        |
| SGO_0209 | 26 | 72.2%    | 29   | 76.7%    | 27   | 81.5%    | 26     | 80.5%    | pgk; phosphoglycerate kinase                               |       |        |       |        |       |        |        |        |
|          | 29 | 72.9%    | 29   | 87.2%    | 28   | 82.5%    | 24     | 72.2%    |                                                            |       |        |       |        |       |        |        |        |
| SGO_0210 | 17 | 14.3%    | 20   | 21.1%    | 3    | 2.1%     |        |          | sspA; streptococcal surface protein A                      |       |        |       |        |       |        |        |        |
|          | 28 | 20.6%    | 15   | 18.4%    | 4    | 4.3%     |        |          |                                                            |       |        |       |        |       |        |        |        |
| SGO_0211 | 20 | 13.4%    | 4    | 3.0%     |      |          |        |          | sspB; streptococcal surface protein B                      |       |        |       |        |       |        |        |        |
|          | 18 | 13.2%    | 5    | 4.5%     |      |          |        |          |                                                            |       |        |       |        |       |        |        |        |

 Show detected proteins only Show all proteins Filter by category:

ABC Transporter

Proteins found:

1179

Dot Plots Dot Plots

Summary Table

SgFn vs Sg

SgPg vs Sg

SgPgFn vs Sg

SgPg vs SgFn

SgPgFn vs SgFn

SgPgFn vs SgPg

Coverage

| Protein  | <i>Sg</i> |          | <i>SgFn</i> |          | <i>SgPg</i> |          | <i>SgPgFn</i> |          | Description                                       | <i>Sg</i>                                                  |        | <i>SgFn</i> |        | <i>SgPg</i> |        | <i>SgPgFn</i> |        |
|----------|-----------|----------|-------------|----------|-------------|----------|---------------|----------|---------------------------------------------------|------------------------------------------------------------|--------|-------------|--------|-------------|--------|---------------|--------|
|          | n         | Coverage | n           | Coverage | n           | Coverage | n             | Coverage |                                                   | Rep I                                                      | Rep II | Rep I       | Rep II | Rep I       | Rep II | Rep I         | Rep II |
| SGO_0214 | 4         | 30.6%    |             |          |             |          |               |          | transcription regulator, MerR family              |                                                            |        |             |        |             |        |               |        |
|          | 16        | 47.1%    | 17          | 48.7%    | 18          | 54.5%    | 15            | 49.6%    | glnA; glutamine synthetase, type I                |                                                            |        |             |        |             |        |               |        |
| SGO_0215 | 20        | 52.7%    | 19          | 56.3%    | 16          | 52.5%    | 12            | 34.4%    |                                                   | metallo-beta-lactamase superfamily protein 1               |        |             |        |             |        |               |        |
|          | 17        | 44.3%    | 18          | 45.0%    | 20          | 51.3%    | 10            | 23.2%    | Protein of unknown function (DUF1447) superfamily |                                                            |        |             |        |             |        |               |        |
| SGO_0219 | 17        | 44.5%    | 15          | 38.8%    | 23          | 58.9%    | 11            | 27.0%    |                                                   | glycoproteinase family protein                             |        |             |        |             |        |               |        |
|          |           |          | 3           | 53.9%    | 4           | 59.2%    |               |          | Protein of unknown function, DUF536 family        |                                                            |        |             |        |             |        |               |        |
| SGO_0220 |           |          |             |          | 5           | 68.4%    |               |          |                                                   | glycerophosphoryl diester phosphodiesterase family protein |        |             |        |             |        |               |        |
|          | 3         | 11.3%    | 3           | 11.6%    |             |          |               |          | conserved hypothetical protein TIGR00103          |                                                            |        |             |        |             |        |               |        |
| SGO_0223 | 3         | 11.3%    |             |          | 3           | 12.2%    |               |          |                                                   | lipoprotein, putative                                      |        |             |        |             |        |               |        |
|          | 4         | 25.6%    | 6           | 40.0%    | 6           | 37.8%    | 4             | 27.2%    | pepX; X-Pro dipeptidyl-peptidase                  |                                                            |        |             |        |             |        |               |        |
| SGO_0230 | 8         | 43.3%    | 5           | 31.1%    | 5           | 31.1%    | 7             | 44.4%    |                                                   | glycerol uptake facilitator protein-like protein           |        |             |        |             |        |               |        |
|          | 4         | 11.1%    |             |          |             |          |               |          | hypothetical protein SGO_0236                     |                                                            |        |             |        |             |        |               |        |
| SGO_0231 | 6         | 17.1%    |             |          |             |          |               |          |                                                   | hypothetical protein SGO_0236                              |        |             |        |             |        |               |        |
|          |           |          |             |          | 3           | 26.9%    | 3             | 26.9%    | hypothetical protein SGO_0236                     |                                                            |        |             |        |             |        |               |        |
| SGO_0232 | 4         | 33.6%    |             |          | 3           | 26.9%    | 3             | 26.9%    |                                                   | hypothetical protein SGO_0236                              |        |             |        |             |        |               |        |
|          | 7         | 31.9%    | 3           | 26.7%    |             |          |               |          | hypothetical protein SGO_0236                     |                                                            |        |             |        |             |        |               |        |
| SGO_0233 | 10        | 48.9%    | 6           | 45.2%    |             |          |               |          |                                                   | hypothetical protein SGO_0236                              |        |             |        |             |        |               |        |
|          | 20        | 35.3%    | 18          | 35.6%    | 19          | 34.8%    | 13            | 23.7%    | hypothetical protein SGO_0236                     |                                                            |        |             |        |             |        |               |        |
| SGO_0234 | 21        | 36.2%    | 19          | 38.5%    | 18          | 30.8%    | 5             | 10.0%    |                                                   | hypothetical protein SGO_0236                              |        |             |        |             |        |               |        |
|          | 3         | 11.3%    |             |          | 4           | 21.9%    |               |          | hypothetical protein SGO_0236                     |                                                            |        |             |        |             |        |               |        |
| SGO_0235 | 4         | 14.1%    |             |          | 3           | 18.7%    |               |          |                                                   | hypothetical protein SGO_0236                              |        |             |        |             |        |               |        |
|          | 6         | 12.0%    |             |          |             |          |               |          | hypothetical protein SGO_0236                     |                                                            |        |             |        |             |        |               |        |
| SGO_0236 | 6         | 11.7%    |             |          |             |          |               |          |                                                   | hypothetical protein SGO_0236                              |        |             |        |             |        |               |        |
|          | 6         | 11.7%    |             |          |             |          |               |          | hypothetical protein SGO_0236                     |                                                            |        |             |        |             |        |               |        |

 Show detected proteins only Show all proteins Filter by category:

ABC Transporter

Proteins found:

1179

Dot Plots Dot Plots

Summary Table

SgFn vs Sg

SgPg vs Sg

SgPgFn vs Sg

SgPg vs SgFn

SgPgFn vs SgFn

SgPgFn vs SgPg

Coverage

Sg

SgFn

SgPg

SgPgFn

Description

Sg

SgFn

SgPg

SgPgFn

Protein

n Coverage

n Coverage

n Coverage

n Coverage

Rep I Rep II

Rep I Rep II

Rep I Rep II

Rep I Rep II

SGO\_0237

3 18.0%

4 26.1%

7 38.0%

3 17.1%

ccpA; CcpA protein (proteinase)

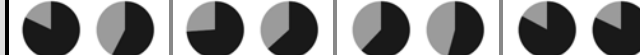

SGO\_0240

5 23.8%

mvaD; diphosphomevalonate decarboxylase

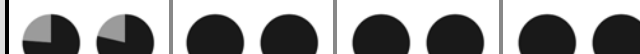

SGO\_0242

3 10.8%

3 14.7%

FMN-dependent dehydrogenase family protein

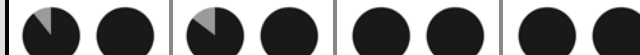

SGO\_0243

3 6.6%

3 12.3%

hydroxymethylglutaryl-CoA reductase, degradative

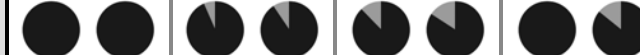

SGO\_0244

3 8.7%

7 20.9%

8 31.6%

6 19.9%

hydroxymethylglutaryl-CoA synthase

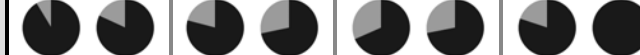

SGO\_0247

45 67.2%

43 66.4%

39 66.7%

33 51.1%

pfl; formate acetyltransferase

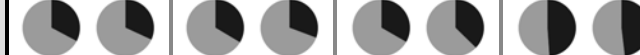

SGO\_0252

7 32.1%

4 16.0%

6 26.9%

3 9.4%

possible TetR-type transcriptional regulator

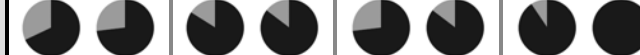

SGO\_0253

10 42.7%

hypothetical protein SGO\_0253

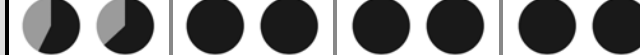

SGO\_0254

6 13.1%

6 12.1%

helicase, RecD/TraA family

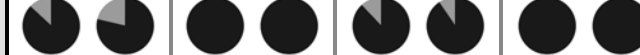

SGO\_0255

11 48.5%

7 46.5%

4 29.0%

5 19.0%

Signal peptidase I

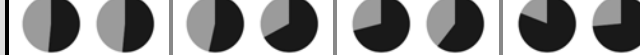

SGO\_0256

4 17.9%

rnhC; ribonuclease HIII

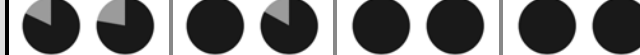

SGO\_0258

3 23.8%

3 56.4%

3 27.7%

hypothetical protein SGO\_0258

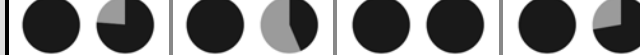 Show detected proteins only Show all proteins Filter by category:

ABC Transporter

Proteins found:

1179

Dot Plots Dot Plots



Summary Table

SgFn vs Sg

SgPg vs Sg

SgPgFn vs Sg

SgPg vs SgFn

SgPgFn vs SgFn

SgPgFn vs SgPg

Coverage

Sg

SgFn

SgPg

SgPgFn

Description

Sg

SgFn

SgPg

SgPgFn

Protein

n Coverage

n Coverage

n Coverage

n Coverage

Rep I Rep II

Rep I Rep II

Rep I Rep II

Rep I Rep II

| Protein  | Sg |          | SgFn |          | SgPg |          | SgPgFn |          | Description                                               | Sg    |        | SgFn  |        | SgPg  |        | SgPgFn |        |
|----------|----|----------|------|----------|------|----------|--------|----------|-----------------------------------------------------------|-------|--------|-------|--------|-------|--------|--------|--------|
|          | n  | Coverage | n    | Coverage | n    | Coverage | n      | Coverage |                                                           | Rep I | Rep II | Rep I | Rep II | Rep I | Rep II | Rep I  | Rep II |
| SGO_0260 | 16 | 29.7%    | 8    | 17.5%    | 13   | 24.3%    | 6      | 8.4%     | DNA mismatch binding protein MutS2                        |       |        |       |        |       |        |        |        |
|          | 23 | 40.2%    | 11   | 22.4%    | 15   | 28.7%    | 7      | 10.8%    |                                                           |       |        |       |        |       |        |        |        |
| SGO_0261 |    |          |      |          |      |          |        |          | acetyltransferase, GNAT family                            |       |        |       |        |       |        |        |        |
|          | 3  | 16.4%    |      |          |      |          |        |          |                                                           |       |        |       |        |       |        |        |        |
| SGO_0262 | 11 | 34.1%    | 9    | 29.7%    | 12   | 32.8%    | 7      | 19.9%    | dipeptidase                                               |       |        |       |        |       |        |        |        |
|          | 9  | 30.5%    | 9    | 32.4%    | 12   | 30.3%    | 5      | 15.9%    |                                                           |       |        |       |        |       |        |        |        |
| SGO_0263 | 4  | 42.3%    | 4    | 42.3%    | 4    | 42.3%    | 4      | 42.3%    | trx-1; thioredoxin                                        |       |        |       |        |       |        |        |        |
|          | 4  | 42.3%    | 6    | 67.3%    | 4    | 42.3%    | 3      | 41.3%    |                                                           |       |        |       |        |       |        |        |        |
| SGO_0268 | 10 | 45.5%    |      |          |      |          |        |          | mechanosensitive transport protein                        |       |        |       |        |       |        |        |        |
|          | 8  | 38.7%    |      |          | 4    | 17.2%    |        |          |                                                           |       |        |       |        |       |        |        |        |
| SGO_0269 | 3  | 22.5%    |      |          |      |          |        |          | hypothetical protein SGO_0269                             |       |        |       |        |       |        |        |        |
|          | 4  | 31.9%    |      |          |      |          |        |          |                                                           |       |        |       |        |       |        |        |        |
| SGO_0272 | 6  | 55.7%    | 7    | 54.9%    | 5    | 42.6%    | 4      | 39.3%    | hypothetical protein SGO_0272                             |       |        |       |        |       |        |        |        |
|          | 5  | 48.4%    | 6    | 49.2%    | 5    | 42.6%    | 4      | 39.3%    |                                                           |       |        |       |        |       |        |        |        |
| SGO_0276 | 19 | 44.9%    | 24   | 63.2%    | 23   | 59.2%    | 16     | 42.4%    | gdhA; glutamate dehydrogenase (NADP)                      |       |        |       |        |       |        |        |        |
|          | 24 | 48.2%    | 22   | 62.9%    | 25   | 65.4%    | 20     | 55.6%    |                                                           |       |        |       |        |       |        |        |        |
| SGO_0277 | 5  | 31.7%    | 4    | 28.8%    | 5    | 35.3%    |        |          | pyrA; Dihydroorotate dehydrogenase                        |       |        |       |        |       |        |        |        |
|          | 5  | 31.7%    | 5    | 35.6%    | 4    | 27.9%    |        |          |                                                           |       |        |       |        |       |        |        |        |
| SGO_0278 |    |          | 3    | 15.8%    |      |          |        |          | msrA; Peptide methionine sulfoxide reductase<br>msrA/msrB |       |        |       |        |       |        |        |        |
|          | 3  | 14.8%    |      |          |      |          |        |          |                                                           |       |        |       |        |       |        |        |        |
| SGO_0279 | 6  | 29.4%    |      |          |      |          |        |          | lipoprotein, putative                                     |       |        |       |        |       |        |        |        |
|          | 4  | 23.7%    |      |          |      |          |        |          |                                                           |       |        |       |        |       |        |        |        |
| SGO_0280 | 6  | 20.4%    | 10   | 41.0%    | 7    | 20.9%    |        |          | trzA; ethylameline chlorohydrolase                        |       |        |       |        |       |        |        |        |
|          | 7  | 23.4%    | 6    | 23.6%    | 6    | 20.6%    |        |          |                                                           |       |        |       |        |       |        |        |        |

- Show detected proteins only  
 Show all proteins

Proteins found:  
1179

Filter by category:

ABC Transporter

Dot Plots Dot Plots

Summary Table

SgFn vs Sg

SgPg vs Sg

SgPgFn vs Sg

SgPg vs SgFn

SgPgFn vs SgFn

SgPgFn vs SgPg

Coverage

Sg

SgFn

SgPg

SgPgFn

Description

Sg

SgFn

SgPg

SgPgFn

Protein

n Coverage

n Coverage

n Coverage

n Coverage

Rep I Rep II

Rep I Rep II

Rep I Rep II

Rep I Rep II

| Protein  | Sg |          | SgFn |          | SgPg |          | SgPgFn |          | Description                                      | Sg    |        | SgFn  |        | SgPg  |        | SgPgFn |        |
|----------|----|----------|------|----------|------|----------|--------|----------|--------------------------------------------------|-------|--------|-------|--------|-------|--------|--------|--------|
|          | n  | Coverage | n    | Coverage | n    | Coverage | n      | Coverage |                                                  | Rep I | Rep II | Rep I | Rep II | Rep I | Rep II | Rep I  | Rep II |
| SGO_0282 | 9  | 27.1%    |      |          |      |          |        |          | cell wall polysaccharide biosynthesis protein    |       |        |       |        |       |        |        |        |
|          | 11 | 37.6%    |      |          |      |          |        |          |                                                  |       |        |       |        |       |        |        |        |
| SGO_0284 | 3  | 9.3%     |      |          |      |          |        |          | transcriptional regulator                        |       |        |       |        |       |        |        |        |
| SGO_0286 | 7  | 16.0%    |      |          |      |          |        |          | DNA mismatch repair protein MutS, putative       |       |        |       |        |       |        |        |        |
|          | 10 | 24.5%    | 3    | 7.7%     |      |          | 3      | 8.3%     |                                                  |       |        |       |        |       |        |        |        |
| SGO_0288 |    |          |      |          | 3    | 21.1%    |        |          | GDSSL-like lipase/acylhydrolase                  |       |        |       |        |       |        |        |        |
|          |    |          | 3    | 21.6%    | 4    | 30.9%    |        |          |                                                  |       |        |       |        |       |        |        |        |
| SGO_0290 | 3  | 28.5%    |      |          | 3    | 28.5%    | 3      | 28.5%    | copper -translocating P-type ATPase              |       |        |       |        |       |        |        |        |
|          | 3  | 28.5%    |      |          | 3    | 28.5%    |        |          |                                                  |       |        |       |        |       |        |        |        |
| SGO_0291 | 16 | 31.1%    | 8    | 19.3%    | 9    | 20.7%    | 7      | 16.6%    | copper-translocating P-type ATPase               |       |        |       |        |       |        |        |        |
|          | 16 | 33.5%    | 6    | 13.4%    | 9    | 20.8%    | 6      | 13.9%    |                                                  |       |        |       |        |       |        |        |        |
| SGO_0292 | 19 | 45.9%    | 14   | 34.7%    | 28   | 64.1%    | 23     | 55.5%    | spxB; pyruvate oxidase                           |       |        |       |        |       |        |        |        |
|          | 24 | 51.1%    | 11   | 35.4%    | 29   | 64.1%    | 24     | 60.2%    |                                                  |       |        |       |        |       |        |        |        |
| SGO_0294 | 4  | 8.6%     |      |          |      |          |        |          | ABC transporter, putative                        |       |        |       |        |       |        |        |        |
|          | 5  | 10.1%    |      |          |      |          |        |          |                                                  |       |        |       |        |       |        |        |        |
| SGO_0297 |    |          | 6    | 15.9%    |      |          |        |          | 6-phospho-beta-glucosidase                       |       |        |       |        |       |        |        |        |
|          | 4  | 11.5%    | 9    | 27.6%    |      |          |        |          |                                                  |       |        |       |        |       |        |        |        |
| SGO_0299 |    |          |      |          |      |          |        |          | putative histidine kinase                        |       |        |       |        |       |        |        |        |
| SGO_0301 |    |          |      |          |      |          | 3      | 14.2%    | ABC transporter ATP-binding protein-like protein |       |        |       |        |       |        |        |        |
| SGO_0306 | 4  | 17.9%    |      |          |      |          |        |          | ABC transporter ATP-binding protein-like protein |       |        |       |        |       |        |        |        |
|          | 6  | 21.9%    |      |          |      |          |        |          |                                                  |       |        |       |        |       |        |        |        |

- Show detected proteins only  
 Show all proteins

Proteins found:  
1179

Filter by category:

ABC Transporter

Dot Plots Dot Plots

Summary Table

SgFn vs Sg

SgPg vs Sg

SgPgFn vs Sg

SgPg vs SgFn

SgPgFn vs SgFn

SgPgFn vs SgPg

Coverage

Sg

SgFn

SgPg

SgPgFn

Description

Sg

SgFn

SgPg

SgPgFn

Protein

n Coverage

n Coverage

n Coverage

n Coverage

Rep I Rep II

Rep I Rep II

Rep I Rep II

Rep I Rep II

| Protein  | Sg |          | SgFn |          | SgPg |          | SgPgFn |          | Description                                                                   | Sg    |        | SgFn  |        | SgPg  |        | SgPgFn |        |
|----------|----|----------|------|----------|------|----------|--------|----------|-------------------------------------------------------------------------------|-------|--------|-------|--------|-------|--------|--------|--------|
|          | n  | Coverage | n    | Coverage | n    | Coverage | n      | Coverage |                                                                               | Rep I | Rep II | Rep I | Rep II | Rep I | Rep II | Rep I  | Rep II |
| SGO_0307 | 4  | 8.8%     |      |          |      |          |        |          | pabB; chorismate binding enzyme                                               |       |        |       |        |       |        |        |        |
|          | 6  | 12.5%    |      |          |      |          |        |          |                                                                               |       |        |       |        |       |        |        |        |
| SGO_0310 | 3  | 5.5%     | 4    | 8.7%     | 4    | 6.8%     |        |          | metE; 5-methyltetrahydropteroyltriglutamate--homocysteine S-methyltransferase |       |        |       |        |       |        |        |        |
|          | 3  | 4.9%     | 5    | 8.3%     |      |          |        |          |                                                                               |       |        |       |        |       |        |        |        |
| SGO_0312 | 33 | 46.3%    | 45   | 58.4%    | 40   | 56.9%    | 34     | 53.5%    | xfp; D-xylulose 5-phosphate/D-fructose 6-phosphate phosphoketolase            |       |        |       |        |       |        |        |        |
|          | 34 | 48.5%    | 55   | 71.2%    | 41   | 57.2%    | 38     | 55.5%    |                                                                               |       |        |       |        |       |        |        |        |
| SGO_0317 | 43 | 46.8%    |      |          |      |          |        |          | LPXTG cell wall surface protein, serine protease, subtilase family            |       |        |       |        |       |        |        |        |
|          | 52 | 50.1%    |      |          |      |          | 3      | 2.6%     |                                                                               |       |        |       |        |       |        |        |        |
| SGO_0321 | 8  | 57.8%    | 8    | 61.3%    | 7    | 51.5%    | 5      | 42.2%    | polypeptide deformylase                                                       |       |        |       |        |       |        |        |        |
|          | 10 | 71.1%    | 8    | 57.4%    | 8    | 56.4%    | 6      | 42.2%    |                                                                               |       |        |       |        |       |        |        |        |
| SGO_0323 |    |          |      |          | 3    | 18.6%    |        |          | pseudouridine synthase rRNA-specific                                          |       |        |       |        |       |        |        |        |
|          | 3  | 14.9%    |      |          |      |          |        |          |                                                                               |       |        |       |        |       |        |        |        |
| SGO_0324 | 10 | 22.6%    |      |          |      |          |        |          | hypothetical protein SGO_0324                                                 |       |        |       |        |       |        |        |        |
|          | 10 | 22.3%    |      |          |      |          |        |          |                                                                               |       |        |       |        |       |        |        |        |
| SGO_0325 | 7  | 25.4%    |      |          |      |          |        |          | probable membrane protein, putative                                           |       |        |       |        |       |        |        |        |
|          |    |          |      |          |      |          |        |          |                                                                               |       |        |       |        |       |        |        |        |
| SGO_0326 | 19 | 38.9%    |      |          | 3    | 8.5%     |        |          | probable membrane protein, putative                                           |       |        |       |        |       |        |        |        |
|          | 23 | 46.5%    |      |          |      |          |        |          |                                                                               |       |        |       |        |       |        |        |        |
| SGO_0327 | 5  | 17.2%    |      |          | 3    | 11.4%    |        |          | Lipopolysaccharide N-acetylglucosaminyltransferase                            |       |        |       |        |       |        |        |        |
|          | 4  | 13.7%    | 4    | 12.4%    |      |          |        |          |                                                                               |       |        |       |        |       |        |        |        |
| SGO_0328 | 5  | 9.8%     |      |          |      |          |        |          | transmembrane protein, putative                                               |       |        |       |        |       |        |        |        |
|          | 5  | 9.8%     |      |          |      |          |        |          |                                                                               |       |        |       |        |       |        |        |        |
| SGO_0329 | 20 | 47.0%    |      |          |      |          |        |          | hypothetical protein SGO_0329                                                 |       |        |       |        |       |        |        |        |
|          | 21 | 49.4%    |      |          | 3    | 8.6%     |        |          |                                                                               |       |        |       |        |       |        |        |        |

 Show detected proteins only Show all proteins Filter by category:

ABC Transporter

Proteins found:

1179

Dot Plots Dot Plots

Summary Table

SgFn vs Sg

SgPg vs Sg

SgPgFn vs Sg

SgPg vs SgFn

SgPgFn vs SgFn

SgPgFn vs SgPg

Coverage

| Protein  | <i>Sg</i> |          | <i>SgFn</i> |          | <i>SgPg</i> |          | <i>SgPgFn</i> |          | Description                                     | <i>Sg</i> |        | <i>SgFn</i> |        | <i>SgPg</i> |        | <i>SgPgFn</i> |        |
|----------|-----------|----------|-------------|----------|-------------|----------|---------------|----------|-------------------------------------------------|-----------|--------|-------------|--------|-------------|--------|---------------|--------|
|          | n         | Coverage | n           | Coverage | n           | Coverage | n             | Coverage |                                                 | Rep I     | Rep II | Rep I       | Rep II | Rep I       | Rep II | Rep I         | Rep II |
| SGO_0330 | 8         | 40.1%    |             |          |             |          |               |          | hypothetical protein SGO_0330                   |           |        |             |        |             |        |               |        |
|          | 8         | 38.5%    |             |          |             |          |               |          |                                                 |           |        |             |        |             |        |               |        |
| SGO_0331 | 4         | 19.7%    |             |          |             |          |               |          | hypothetical protein SGO_0331                   |           |        |             |        |             |        |               |        |
|          | 6         | 23.3%    |             |          |             |          |               |          |                                                 |           |        |             |        |             |        |               |        |
| SGO_0332 | 12        | 40.6%    |             |          |             |          |               |          | hypothetical protein SGO_0332                   |           |        |             |        |             |        |               |        |
|          | 14        | 40.8%    |             |          |             |          |               |          |                                                 |           |        |             |        |             |        |               |        |
| SGO_0333 | 8         | 34.8%    | 9           | 68.5%    | 11          | 68.5%    | 10            | 38.2%    | rpsO; ribosomal protein S15                     |           |        |             |        |             |        |               |        |
|          | 11        | 68.5%    | 8           | 66.3%    | 11          | 68.5%    | 10            | 66.3%    |                                                 |           |        |             |        |             |        |               |        |
| SGO_0337 |           |          |             |          | 3           | 33.7%    |               |          | trx-2; thioredoxin                              |           |        |             |        |             |        |               |        |
|          | 3         | 34.6%    |             |          |             |          |               |          |                                                 |           |        |             |        |             |        |               |        |
| SGO_0339 |           |          | 7           | 27.0%    | 3           | 11.8%    |               |          | hypothetical protein SGO_0339                   |           |        |             |        |             |        |               |        |
|          | 4         | 16.3%    | 7           | 31.9%    |             |          |               |          |                                                 |           |        |             |        |             |        |               |        |
| SGO_0342 | 15        | 34.6%    | 19          | 44.5%    | 17          | 39.1%    | 12            | 26.9%    | pepF-2; oligoendopeptidase                      |           |        |             |        |             |        |               |        |
|          | 15        | 33.4%    | 21          | 45.0%    | 18          | 43.0%    | 10            | 19.2%    |                                                 |           |        |             |        |             |        |               |        |
| SGO_0344 | 27        | 48.1%    | 29          | 47.3%    | 28          | 48.4%    | 22            | 38.6%    | pnpA; polyribonucleotide nucleotidyltransferase |           |        |             |        |             |        |               |        |
|          | 31        | 48.5%    | 27          | 44.1%    | 26          | 50.4%    | 16            | 26.0%    |                                                 |           |        |             |        |             |        |               |        |
| SGO_0345 | 3         | 16.1%    |             |          |             |          |               |          | cysE; serine O-acetyltransferase                |           |        |             |        |             |        |               |        |
|          | 6         | 23.4%    |             |          |             |          |               |          |                                                 |           |        |             |        |             |        |               |        |
| SGO_0348 |           |          | 5           | 48.0%    | 3           | 31.8%    |               |          | reductase                                       |           |        |             |        |             |        |               |        |
|          | 4         | 36.4%    |             |          | 3           | 31.8%    |               |          |                                                 |           |        |             |        |             |        |               |        |
| SGO_0349 | 11        | 32.2%    | 10          | 28.6%    | 12          | 36.5%    | 10            | 25.7%    | cysS; cysteinyl-tRNA synthetase                 |           |        |             |        |             |        |               |        |
|          | 11        | 31.8%    | 11          | 31.1%    | 11          | 32.7%    | 7             | 18.3%    |                                                 |           |        |             |        |             |        |               |        |
| SGO_0352 | 14        | 42.3%    | 12          | 40.7%    | 13          | 48.4%    | 7             | 26.1%    | ABC transporter, ATP-binding protein SP1580     |           |        |             |        |             |        |               |        |
|          | 16        | 47.6%    | 12          | 37.8%    | 12          | 39.6%    | 6             | 21.5%    |                                                 |           |        |             |        |             |        |               |        |

- Show detected proteins only
- Show all proteins

Proteins found:  
1179

Filter by category:

ABC Transporter

Dot Plots Dot Plots

Summary Table

SgFn vs Sg

SgPg vs Sg

SgPgFn vs Sg

SgPg vs SgFn

SgPgFn vs SgFn

SgPgFn vs SgPg

Coverage

| Protein  | Sg |          | SgFn |          | SgPg |          | SgPgFn |          | Description                                  | Sg    |        | SgFn  |        | SgPg  |        | SgPgFn |        |
|----------|----|----------|------|----------|------|----------|--------|----------|----------------------------------------------|-------|--------|-------|--------|-------|--------|--------|--------|
|          | n  | Coverage | n    | Coverage | n    | Coverage | n      | Coverage |                                              | Rep I | Rep II | Rep I | Rep II | Rep I | Rep II | Rep I  | Rep II |
| SGO_0353 | 3  | 6.0%     | 4    | 7.6%     | 5    | 7.8%     |        |          | transport protein                            |       |        |       |        |       |        |        |        |
|          | 3  | 5.2%     | 3    | 6.3%     | 3    | 6.0%     |        |          |                                              |       |        |       |        |       |        |        |        |
| SGO_0355 | 5  | 27.6%    | 4    | 20.6%    | 6    | 35.0%    |        |          | RNA methyltransferase, TrmH family, group 3  |       |        |       |        |       |        |        |        |
|          | 7  | 28.0%    | 4    | 23.5%    | 5    | 30.9%    |        |          |                                              |       |        |       |        |       |        |        |        |
| SGO_0356 | 3  | 16.4%    |      |          |      |          |        |          | hypothetical protein SGO_0356                |       |        |       |        |       |        |        |        |
|          |    |          |      |          |      |          |        |          |                                              |       |        |       |        |       |        |        |        |
| SGO_0357 | 8  | 44.3%    | 10   | 59.6%    | 11   | 59.6%    | 8      | 57.1%    | degV; DegV family fatty acid binding protein |       |        |       |        |       |        |        |        |
|          | 9  | 47.4%    | 6    | 39.0%    | 12   | 63.8%    | 9      | 47.7%    |                                              |       |        |       |        |       |        |        |        |
| SGO_0358 | 11 | 78.4%    | 10   | 73.0%    | 9    | 65.5%    | 8      | 70.3%    | rpmI; ribosomal protein L13                  |       |        |       |        |       |        |        |        |
|          | 11 | 79.1%    | 12   | 77.7%    | 11   | 79.1%    | 10     | 75.7%    |                                              |       |        |       |        |       |        |        |        |
| SGO_0359 | 5  | 27.7%    | 6    | 28.5%    | 5    | 21.5%    | 5      | 21.5%    | rpsI; ribosomal protein S9                   |       |        |       |        |       |        |        |        |
|          | 6  | 28.5%    | 4    | 20.8%    | 5    | 21.5%    | 5      | 21.5%    |                                              |       |        |       |        |       |        |        |        |
| SGO_0361 | 6  | 33.1%    | 4    | 35.5%    | 5    | 40.7%    |        |          | immunity repressor protein                   |       |        |       |        |       |        |        |        |
|          | 5  | 33.1%    | 5    | 35.5%    | 3    | 28.5%    |        |          |                                              |       |        |       |        |       |        |        |        |
| SGO_0368 | 3  | 9.8%     | 5    | 11.9%    |      |          | 3      | 9.4%     | merA; mercury(II) reductase                  |       |        |       |        |       |        |        |        |
|          | 4  | 10.9%    | 5    | 13.2%    |      |          |        |          |                                              |       |        |       |        |       |        |        |        |
| SGO_0371 |    |          |      |          |      |          |        |          | putative transcriptional regulator           |       |        |       |        |       |        |        |        |
|          | 4  | 39.7%    |      |          |      |          |        |          |                                              |       |        |       |        |       |        |        |        |
| SGO_0372 | 6  | 18.9%    | 12   | 25.7%    | 8    | 30.1%    | 7      | 25.1%    | malate oxidoreductase                        |       |        |       |        |       |        |        |        |
|          | 8  | 22.2%    | 10   | 24.0%    | 7    | 23.1%    | 6      | 17.4%    |                                              |       |        |       |        |       |        |        |        |
| SGO_0374 | 7  | 29.5%    | 9    | 40.6%    | 8    | 40.6%    | 5      | 23.4%    | Response regulator of the LytR/AlgR family   |       |        |       |        |       |        |        |        |
|          | 8  | 34.4%    | 9    | 46.3%    | 9    | 41.8%    | 4      | 14.3%    |                                              |       |        |       |        |       |        |        |        |
| SGO_0376 |    |          |      |          |      |          | 4      | 24.3%    | ABC transporter ATP-binding protein          |       |        |       |        |       |        |        |        |
|          | 5  | 23.9%    |      |          |      |          |        |          |                                              |       |        |       |        |       |        |        |        |

 Show detected proteins only Show all proteins Filter by category:

ABC Transporter

Proteins found:

1179

Dot Plots Dot Plots

Summary Table

SgFn vs Sg

SgPg vs Sg

SgPgFn vs Sg

SgPg vs SgFn

SgPgFn vs SgFn

SgPgFn vs SgPg

Coverage

Sg

SgFn

SgPg

SgPgFn

Description

Sg

SgFn

SgPg

SgPgFn

Protein

n Coverage

n Coverage

n Coverage

n Coverage

Rep I Rep II

Rep I Rep II

Rep I Rep II

Rep I Rep II

SGO\_0378

3 29.9%

hypothetical protein SGO\_0378

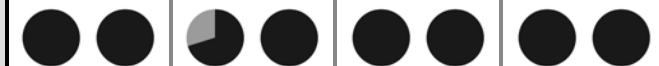

SGO\_0379

6 31.6%

7 34.9%

Protein of unknown function (DUF421) family

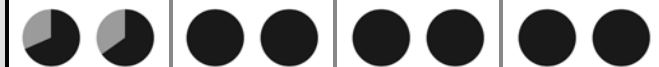

SGO\_0380

3 23.3%

hypothetical protein SGO\_0380

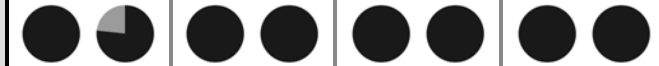

SGO\_0384

3 15.7%

4 23.1%

3 15.7%

4 25.3%

putative carboxylate-amine/thiol ligase

5 22.8%

6 29.2%

6 34.3%

5 29.2%

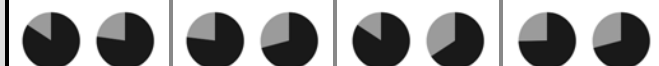

SGO\_0385

19 19.9%

21 21.7%

exo-beta-D-fructosidase

24 27.5%

18 19.0%

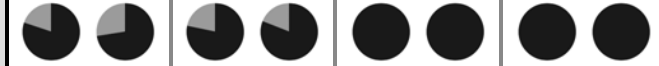

SGO\_0387

4 22.1%

6 31.7%

hypothetical protein SGO\_0387

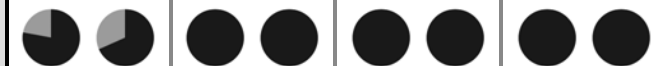

SGO\_0388

19 25.3%

16 26.6%

LPXTG cell wall surface protein, zinc carboxypeptidase family

27 36.4%

13 18.7%

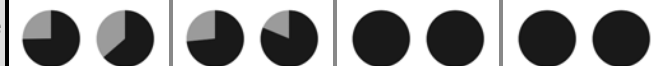

SGO\_0389

3 37.5%

possible phosphoserine phosphatase

3 28.4%

3 45.5%

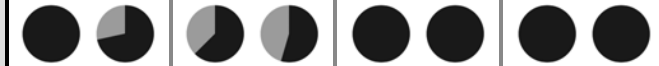

SGO\_0390

14 43.4%

19 51.2%

23 56.4%

11 34.4%

glycerol-3-phosphate dehydrogenase (NAD(P)+)

18 50.3%

16 48.8%

18 49.7%

13 37.1%

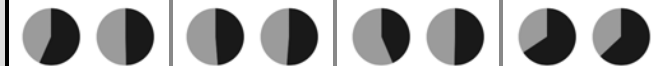

SGO\_0392

7 36.4%

6 32.5%

3 14.5%

phosphoglycerate mutase

4 25.4%

5 28.9%

6 32.5%

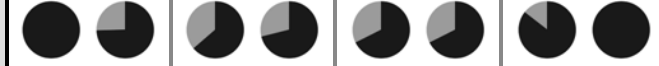

SGO\_0393

8 53.7%

3 16.3%

D-alanyl-D-alanine carboxypeptidase

10 63.8%

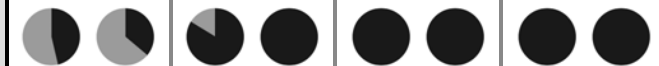

SGO\_0396

3 25.2%

Transcriptional regulator, PadR family

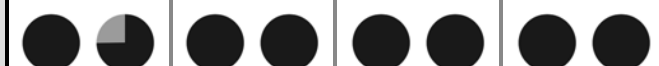 Show detected proteins only Show all proteins Filter by category:

ABC Transporter

Proteins found:

1179

Dot Plots Dot Plots

Summary Table

SgFn vs Sg

SgPg vs Sg

SgPgFn vs Sg

SgPg vs SgFn

SgPgFn vs SgFn

SgPgFn vs SgPg

Coverage

| Protein  | Sg |          | SgFn |          | SgPg |          | SgPgFn |          | Description                                       | Sg    |        | SgFn  |        | SgPg  |        | SgPgFn |        |
|----------|----|----------|------|----------|------|----------|--------|----------|---------------------------------------------------|-------|--------|-------|--------|-------|--------|--------|--------|
|          | n  | Coverage | n    | Coverage | n    | Coverage | n      | Coverage |                                                   | Rep I | Rep II | Rep I | Rep II | Rep I | Rep II | Rep I  | Rep II |
| SGO_0398 | 12 | 49.5%    | 4    | 16.1%    | 5    | 20.4%    | 4      | 17.5%    | ABC transporter ATP-binding protein               |       |        |       |        |       |        |        |        |
|          | 10 | 35.1%    | 5    | 20.7%    | 3    | 14.0%    | 4      | 17.9%    |                                                   |       |        |       |        |       |        |        |        |
| SGO_0400 | 4  | 12.8%    | 8    | 27.6%    |      |          |        |          | hrcA; heat-inducible transcription repressor HrcA |       |        |       |        |       |        |        |        |
|          | 4  | 12.5%    | 4    | 16.6%    |      |          |        |          |                                                   |       |        |       |        |       |        |        |        |
| SGO_0401 | 8  | 41.8%    | 9    | 46.9%    | 7    | 33.9%    | 6      | 33.9%    | grpE; co-chaperone GrpE                           |       |        |       |        |       |        |        |        |
|          | 10 | 53.7%    | 9    | 53.7%    | 8    | 41.8%    | 7      | 33.9%    |                                                   |       |        |       |        |       |        |        |        |
| SGO_0402 | 29 | 56.8%    | 40   | 71.3%    | 32   | 64.3%    | 29     | 61.6%    | dnaK; DnaK chaperone protein                      |       |        |       |        |       |        |        |        |
|          | 36 | 63.8%    | 42   | 74.6%    | 33   | 64.4%    | 33     | 64.6%    |                                                   |       |        |       |        |       |        |        |        |
| SGO_0404 | 15 | 42.0%    | 6    | 23.6%    | 8    | 28.9%    | 6      | 19.7%    | dnaJ; DnaJ chaperone protein                      |       |        |       |        |       |        |        |        |
|          | 21 | 50.1%    | 9    | 26.2%    | 13   | 35.7%    | 8      | 27.8%    |                                                   |       |        |       |        |       |        |        |        |
| SGO_0407 |    |          | 3    | 17.3%    | 3    | 19.7%    |        |          | truA; tRNA pseudouridine synthase A               |       |        |       |        |       |        |        |        |
|          | 3  | 16.9%    | 3    | 17.3%    |      |          |        |          |                                                   |       |        |       |        |       |        |        |        |
| SGO_0408 | 65 | 42.9%    |      |          |      |          |        |          | zmpB; zinc metalloproteinase B                    |       |        |       |        |       |        |        |        |
|          | 68 | 42.0%    |      |          |      |          | 4      | 3.6%     |                                                   |       |        |       |        |       |        |        |        |
| SGO_0409 | 3  | 17.0%    | 14   | 67.2%    | 3    | 28.5%    |        |          | pyridoxine kinase                                 |       |        |       |        |       |        |        |        |
|          |    |          | 13   | 70.8%    | 4    | 26.9%    |        |          |                                                   |       |        |       |        |       |        |        |        |
| SGO_0411 |    |          | 12   | 80.7%    | 3    | 12.8%    | 3      | 12.8%    | conserved hypothetical protein TIGR01440          |       |        |       |        |       |        |        |        |
|          |    |          | 11   | 84.5%    | 3    | 12.8%    |        |          |                                                   |       |        |       |        |       |        |        |        |
| SGO_0412 | 28 | 73.8%    | 33   | 83.8%    | 32   | 81.0%    | 27     | 73.1%    | tig; trigger factor                               |       |        |       |        |       |        |        |        |
|          | 35 | 85.9%    | 30   | 84.3%    | 32   | 81.0%    | 27     | 73.1%    |                                                   |       |        |       |        |       |        |        |        |
| SGO_0413 | 5  | 45.1%    | 6    | 46.2%    | 5    | 33.3%    | 4      | 32.3%    | DNA-directed RNA polymerase delta chain           |       |        |       |        |       |        |        |        |
|          | 3  | 22.6%    | 7    | 35.9%    | 5    | 33.3%    | 5      | 33.3%    |                                                   |       |        |       |        |       |        |        |        |
| SGO_0415 | 41 | 59.2%    | 34   | 53.6%    | 39   | 59.8%    | 29     | 46.2%    | secA; preprotein translocase, SecA subunit        |       |        |       |        |       |        |        |        |
|          | 45 | 61.2%    | 30   | 50.6%    | 34   | 54.9%    | 33     | 55.5%    |                                                   |       |        |       |        |       |        |        |        |

Description

| Protein  | Sg |          | SgFn |          | SgPg |          | SgPgFn |          | Description                                       | Sg    |        | SgFn  |        | SgPg  |        | SgPgFn |        |
|----------|----|----------|------|----------|------|----------|--------|----------|---------------------------------------------------|-------|--------|-------|--------|-------|--------|--------|--------|
|          | n  | Coverage | n    | Coverage | n    | Coverage | n      | Coverage |                                                   | Rep I | Rep II | Rep I | Rep II | Rep I | Rep II | Rep I  | Rep II |
| SGO_0398 | 12 | 49.5%    | 4    | 16.1%    | 5    | 20.4%    | 4      | 17.5%    | ABC transporter ATP-binding protein               |       |        |       |        |       |        |        |        |
|          | 10 | 35.1%    | 5    | 20.7%    | 3    | 14.0%    | 4      | 17.9%    |                                                   |       |        |       |        |       |        |        |        |
| SGO_0400 | 4  | 12.8%    | 8    | 27.6%    |      |          |        |          | hrcA; heat-inducible transcription repressor HrcA |       |        |       |        |       |        |        |        |
|          | 4  | 12.5%    | 4    | 16.6%    |      |          |        |          |                                                   |       |        |       |        |       |        |        |        |
| SGO_0401 | 8  | 41.8%    | 9    | 46.9%    | 7    | 33.9%    | 6      | 33.9%    | grpE; co-chaperone GrpE                           |       |        |       |        |       |        |        |        |
|          | 10 | 53.7%    | 9    | 53.7%    | 8    | 41.8%    | 7      | 33.9%    |                                                   |       |        |       |        |       |        |        |        |
| SGO_0402 | 29 | 56.8%    | 40   | 71.3%    | 32   | 64.3%    | 29     | 61.6%    | dnaK; DnaK chaperone protein                      |       |        |       |        |       |        |        |        |
|          | 36 | 63.8%    | 42   | 74.6%    | 33   | 64.4%    | 33     | 64.6%    |                                                   |       |        |       |        |       |        |        |        |
| SGO_0404 | 15 | 42.0%    | 6    | 23.6%    | 8    | 28.9%    | 6      | 19.7%    | dnaJ; DnaJ chaperone protein                      |       |        |       |        |       |        |        |        |
|          | 21 | 50.1%    | 9    | 26.2%    | 13   | 35.7%    | 8      | 27.8%    |                                                   |       |        |       |        |       |        |        |        |
| SGO_0407 |    |          | 3    | 17.3%    | 3    | 19.7%    |        |          | truA; tRNA pseudouridine synthase A               |       |        |       |        |       |        |        |        |
|          | 3  | 16.9%    | 3    | 17.3%    |      |          |        |          |                                                   |       |        |       |        |       |        |        |        |
| SGO_0408 | 65 | 42.9%    |      |          |      |          |        |          | zmpB; zinc metalloproteinase B                    |       |        |       |        |       |        |        |        |
|          | 68 | 42.0%    |      |          |      |          | 4      | 3.6%     |                                                   |       |        |       |        |       |        |        |        |
| SGO_0409 | 3  | 17.0%    | 14   | 67.2%    | 3    | 28.5%    |        |          | pyridoxine kinase                                 |       |        |       |        |       |        |        |        |
|          |    |          | 13   | 70.8%    | 4    | 26.9%    |        |          |                                                   |       |        |       |        |       |        |        |        |
| SGO_0411 |    |          | 12   | 80.7%    | 3    | 12.8%    | 3      | 12.8%    | conserved hypothetical protein TIGR01440          |       |        |       |        |       |        |        |        |
|          |    |          | 11   | 84.5%    | 3    | 12.8%    |        |          |                                                   |       |        |       |        |       |        |        |        |
| SGO_0412 | 28 | 73.8%    | 33   | 83.8%    | 32   | 81.0%    | 27     | 73.1%    | tig; trigger factor                               |       |        |       |        |       |        |        |        |
|          | 35 | 85.9%    | 30   | 84.3%    | 32   | 81.0%    | 27     | 73.1%    |                                                   |       |        |       |        |       |        |        |        |
| SGO_0413 | 5  | 45.1%    | 6    | 46.2%    | 5    | 33.3%    | 4      | 32.3%    | DNA-directed RNA polymerase delta chain           |       |        |       |        |       |        |        |        |
|          | 3  | 22.6%    | 7    | 35.9%    | 5    | 33.3%    | 5      | 33.3%    |                                                   |       |        |       |        |       |        |        |        |
| SGO_0415 | 41 | 59.2%    | 34   | 53.6%    | 39   | 59.8%    | 29     | 46.2%    | secA; preprotein translocase, SecA subunit        |       |        |       |        |       |        |        |        |
|          | 45 | 61.2%    | 30   | 50.6%    | 34   | 54.9%    | 33     | 55.5%    |                                                   |       |        |       |        |       |        |        |        |

- Show detected proteins only  
 Show all proteins

Filter by category:

ABC Transporter

Proteins found:  
1179

Dot Plots Dot Plots

Summary Table

SgFn vs Sg

SgPg vs Sg

SgPgFn vs Sg

SgPg vs SgFn

SgPgFn vs SgFn

SgPgFn vs SgPg

Coverage

| Protein  | Sg |          | SgFn |          | SgPg |          | SgPgFn |          | Description                                            | Sg    |        | SgFn  |        | SgPg  |        | SgPgFn |        |
|----------|----|----------|------|----------|------|----------|--------|----------|--------------------------------------------------------|-------|--------|-------|--------|-------|--------|--------|--------|
|          | n  | Coverage | n    | Coverage | n    | Coverage | n      | Coverage |                                                        | Rep I | Rep II | Rep I | Rep II | Rep I | Rep II | Rep I  | Rep II |
| SGO_0416 | 12 | 44.9%    | 15   | 51.0%    | 15   | 59.5%    | 11     | 42.3%    | phospho-2-dehydro-3-deoxyheptonate aldolase            |       |        |       |        |       |        |        |        |
|          | 14 | 53.6%    | 14   | 50.7%    | 12   | 46.4%    | 6      | 27.4%    |                                                        |       |        |       |        |       |        |        |        |
| SGO_0418 |    |          | 7    | 26.4%    | 4    | 18.5%    |        |          | alr; alanine racemase                                  |       |        |       |        |       |        |        |        |
|          |    |          | 6    | 22.8%    | 4    | 12.5%    |        |          |                                                        |       |        |       |        |       |        |        |        |
| SGO_0425 | 3  | 16.9%    | 4    | 22.5%    | 3    | 16.9%    |        |          | ansB; asparaginase                                     |       |        |       |        |       |        |        |        |
|          |    |          |      |          |      |          |        |          |                                                        |       |        |       |        |       |        |        |        |
| SGO_0426 | 10 | 24.6%    | 6    | 16.6%    | 7    | 14.9%    | 5      | 14.3%    | Cof family protein                                     |       |        |       |        |       |        |        |        |
|          | 13 | 31.3%    | 11   | 32.2%    | 6    | 13.2%    |        |          |                                                        |       |        |       |        |       |        |        |        |
| SGO_0427 | 5  | 38.7%    | 8    | 62.7%    | 6    | 57.3%    | 4      | 30.7%    | universal stress protein family                        |       |        |       |        |       |        |        |        |
|          | 7  | 44.7%    | 8    | 76.7%    | 6    | 57.3%    | 6      | 51.3%    |                                                        |       |        |       |        |       |        |        |        |
| SGO_0429 | 18 | 56.7%    | 18   | 57.2%    | 20   | 61.6%    | 15     | 51.7%    | aspartate transaminase                                 |       |        |       |        |       |        |        |        |
|          | 18 | 59.2%    | 17   | 56.7%    | 19   | 59.9%    | 16     | 51.5%    |                                                        |       |        |       |        |       |        |        |        |
| SGO_0430 | 29 | 48.6%    | 17   | 29.0%    |      |          |        |          | LPXTG cell wall surface protein                        |       |        |       |        |       |        |        |        |
|          | 38 | 57.1%    | 14   | 25.3%    |      |          |        |          |                                                        |       |        |       |        |       |        |        |        |
| SGO_0431 | 8  | 32.1%    |      |          | 6    | 28.6%    |        |          | GTP-sensing transcriptional pleiotropic repressor codY |       |        |       |        |       |        |        |        |
|          | 6  | 23.7%    | 4    | 16.4%    | 5    | 20.6%    |        |          |                                                        |       |        |       |        |       |        |        |        |
| SGO_0432 | 4  | 36.2%    |      |          | 3    | 29.2%    | 3      | 29.2%    | entB; isochorismatase family protein                   |       |        |       |        |       |        |        |        |
|          | 5  | 40.0%    | 4    | 36.2%    | 3    | 29.2%    | 3      | 29.2%    |                                                        |       |        |       |        |       |        |        |        |
| SGO_0434 | 19 | 47.6%    | 12   | 33.2%    | 14   | 40.1%    | 11     | 26.6%    | aspS-2; aspartyl-tRNA synthetase                       |       |        |       |        |       |        |        |        |
|          | 22 | 49.7%    | 17   | 42.0%    | 13   | 36.3%    | 8      | 22.5%    |                                                        |       |        |       |        |       |        |        |        |
| SGO_0435 | 5  | 59.0%    | 5    | 80.0%    | 5    | 79.0%    | 4      | 41.0%    | gatC; glutamyl-tRNA(Gln) amidotransferase, C subunit   |       |        |       |        |       |        |        |        |
|          | 5  | 51.0%    | 5    | 89.0%    | 5    | 78.0%    | 4      | 49.0%    |                                                        |       |        |       |        |       |        |        |        |
| SGO_0436 | 22 | 55.9%    | 16   | 42.2%    | 21   | 52.7%    | 16     | 43.6%    | gatA; glutamyl-tRNA(Gln) amidotransferase, A subunit   |       |        |       |        |       |        |        |        |
|          | 25 | 54.9%    | 18   | 43.9%    | 19   | 50.6%    | 19     | 52.7%    |                                                        |       |        |       |        |       |        |        |        |

 Show detected proteins only Show all proteins Filter by category:

ABC Transporter

Proteins found:

1179

Dot Plots Dot Plots



Summary Table

SgFn vs Sg

SgPg vs Sg

SgPgFn vs Sg

SgPg vs SgFn

SgPgFn vs SgFn

SgPgFn vs SgPg

Coverage

| Protein  | Sg |          | SgFn |          | SgPg |          | SgPgFn |          | Description                                                    | Sg    |        | SgFn  |        | SgPg  |        | SgPgFn |        |
|----------|----|----------|------|----------|------|----------|--------|----------|----------------------------------------------------------------|-------|--------|-------|--------|-------|--------|--------|--------|
|          | n  | Coverage | n    | Coverage | n    | Coverage | n      | Coverage |                                                                | Rep I | Rep II | Rep I | Rep II | Rep I | Rep II | Rep I  | Rep II |
| SGO_0437 | 20 | 47.0%    | 19   | 55.6%    | 22   | 57.2%    | 17     | 43.8%    | gatB; glutamyl-tRNA(Gln) amidotransferase, B subunit           |       |        |       |        |       |        |        |        |
|          | 21 | 48.8%    | 19   | 52.0%    | 21   | 56.6%    | 13     | 30.2%    |                                                                |       |        |       |        |       |        |        |        |
| SGO_0440 | 4  | 21.6%    | 11   | 49.7%    | 7    | 37.1%    | 4      | 29.0%    | L-iditol 2-dehydrogenase BH3949                                |       |        |       |        |       |        |        |        |
|          | 5  | 26.1%    | 13   | 62.4%    | 4    | 25.3%    |        |          |                                                                |       |        |       |        |       |        |        |        |
| SGO_0444 |    |          |      |          |      |          |        |          | HAD superfamily (subfamily IIIA) phosphatase, TIGR01668        |       |        |       |        |       |        |        |        |
|          | 3  | 19.5%    |      |          |      |          |        |          |                                                                |       |        |       |        |       |        |        |        |
| SGO_0445 | 11 | 42.1%    | 12   | 42.9%    | 14   | 54.6%    | 6      | 22.0%    | GTP-binding protein                                            |       |        |       |        |       |        |        |        |
|          | 13 | 48.1%    | 10   | 38.6%    | 14   | 45.9%    | 6      | 21.2%    |                                                                |       |        |       |        |       |        |        |        |
| SGO_0446 |    |          |      |          |      |          |        |          | conserved hypothetical protein TIGR00253                       |       |        |       |        |       |        |        |        |
|          | 3  | 53.4%    |      |          |      |          |        |          |                                                                |       |        |       |        |       |        |        |        |
| SGO_0447 | 4  | 34.3%    | 6    | 43.8%    | 4    | 38.1%    |        |          | nadD; nicotinate (nicotinamide) nucleotide adenylyltransferase |       |        |       |        |       |        |        |        |
|          | 4  | 24.8%    | 5    | 48.6%    | 3    | 30.0%    |        |          |                                                                |       |        |       |        |       |        |        |        |
| SGO_0448 | 5  | 32.7%    | 9    | 50.8%    | 5    | 35.2%    | 3      | 22.1%    | conserved hypothetical protein TIGR00488                       |       |        |       |        |       |        |        |        |
|          | 4  | 28.1%    | 6    | 40.7%    | 7    | 49.2%    |        |          |                                                                |       |        |       |        |       |        |        |        |
| SGO_0449 |    |          |      |          |      |          |        |          | isochorismatase family protein                                 |       |        |       |        |       |        |        |        |
|          | 3  | 18.6%    |      |          |      |          |        |          |                                                                |       |        |       |        |       |        |        |        |
| SGO_0450 |    |          | 3    | 24.0%    | 4    | 32.2%    |        |          | iojap-related protein                                          |       |        |       |        |       |        |        |        |
|          | 4  | 38.0%    | 4    | 30.6%    | 3    | 32.2%    |        |          |                                                                |       |        |       |        |       |        |        |        |
| SGO_0451 |    |          |      |          | 4    | 20.9%    |        |          | methyltransferase                                              |       |        |       |        |       |        |        |        |
|          |    |          |      |          | 4    | 20.9%    |        |          |                                                                |       |        |       |        |       |        |        |        |
| SGO_0453 | 18 | 56.2%    |      |          |      |          |        |          | lipoprotein, putative                                          |       |        |       |        |       |        |        |        |
|          | 26 | 64.5%    |      |          |      |          |        |          |                                                                |       |        |       |        |       |        |        |        |
| SGO_0454 | 6  | 31.9%    | 4    | 25.6%    | 6    | 32.8%    | 3      | 20.2%    | conserved hypothetical protein TIGR01033                       |       |        |       |        |       |        |        |        |
|          | 8  | 40.3%    | 4    | 25.6%    | 4    | 26.9%    | 3      | 20.2%    |                                                                |       |        |       |        |       |        |        |        |

- Show detected proteins only
- Show all proteins

Proteins found:  
1179

Filter by category:

ABC Transporter

Dot Plots Dot Plots

Summary Table

SgFn vs Sg

SgPg vs Sg

SgPgFn vs Sg

SgPg vs SgFn

SgPgFn vs SgFn

SgPgFn vs SgPg

Coverage

Sg

SgFn

SgPg

SgPgFn

Description

Sg

SgFn

SgPg

SgPgFn

Protein

n Coverage

n Coverage

n Coverage

n Coverage

Rep I Rep II

Rep I Rep II

Rep I Rep II

Rep I Rep II

| Protein  | Sg |          | SgFn |          | SgPg |          | SgPgFn |          | Description                                          | Sg    |        | SgFn  |        | SgPg  |        | SgPgFn |        |
|----------|----|----------|------|----------|------|----------|--------|----------|------------------------------------------------------|-------|--------|-------|--------|-------|--------|--------|--------|
|          | n  | Coverage | n    | Coverage | n    | Coverage | n      | Coverage |                                                      | Rep I | Rep II | Rep I | Rep II | Rep I | Rep II | Rep I  | Rep II |
| SGO_0455 | 21 | 61.0%    | 3    | 8.7%     | 10   | 40.9%    | 6      | 24.4%    | lipoprotein, putative                                |       |        |       |        |       |        |        |        |
|          | 21 | 59.9%    |      |          | 9    | 35.5%    | 7      | 27.6%    |                                                      |       |        |       |        |       |        |        |        |
| SGO_0456 | 4  | 13.8%    | 5    | 26.8%    |      |          |        |          | ILL5; amino acid aminohydrolase                      |       |        |       |        |       |        |        |        |
|          | 5  | 17.0%    | 9    | 42.2%    |      |          |        |          |                                                      |       |        |       |        |       |        |        |        |
| SGO_0457 | 17 | 48.8%    | 6    | 27.7%    | 11   | 36.8%    | 9      | 33.0%    | ABC transporter, substrate-binding protein SP0148    |       |        |       |        |       |        |        |        |
|          | 23 | 57.5%    | 7    | 34.0%    | 12   | 40.0%    | 6      | 20.4%    |                                                      |       |        |       |        |       |        |        |        |
| SGO_0458 | 24 | 71.4%    | 17   | 67.9%    | 17   | 61.3%    | 15     | 59.2%    | hlpA; lipoprotein                                    |       |        |       |        |       |        |        |        |
|          | 27 | 70.7%    | 11   | 55.1%    | 16   | 61.0%    | 16     | 60.6%    |                                                      |       |        |       |        |       |        |        |        |
| SGO_0459 | 8  | 30.9%    | 6    | 21.2%    | 8    | 24.7%    |        |          | succinyl-diaminopimelate desuccinylase               |       |        |       |        |       |        |        |        |
|          | 10 | 35.2%    | 7    | 25.2%    | 4    | 14.2%    |        |          |                                                      |       |        |       |        |       |        |        |        |
| SGO_0460 | 12 | 34.2%    | 5    | 13.8%    | 10   | 31.4%    | 6      | 14.7%    | ABC transporter, ATP-binding protein SP0151          |       |        |       |        |       |        |        |        |
|          | 12 | 33.6%    | 6    | 17.8%    | 8    | 23.7%    | 6      | 18.1%    |                                                      |       |        |       |        |       |        |        |        |
| SGO_0463 | 3  | 6.5%     |      |          |      |          |        |          | cydD; putative ABC transporter (ATP-binding protein) |       |        |       |        |       |        |        |        |
|          | 5  | 10.9%    |      |          |      |          |        |          |                                                      |       |        |       |        |       |        |        |        |
| SGO_0468 | 7  | 26.3%    | 7    | 26.3%    | 7    | 29.2%    | 6      | 28.5%    | hypothetical protein SGO_0468                        |       |        |       |        |       |        |        |        |
|          | 8  | 31.0%    | 7    | 26.3%    | 11   | 42.3%    | 5      | 24.9%    |                                                      |       |        |       |        |       |        |        |        |
| SGO_0469 | 3  | 10.2%    |      |          |      |          |        |          | integral membrane protein                            |       |        |       |        |       |        |        |        |
|          | 3  | 10.2%    |      |          |      |          |        |          |                                                      |       |        |       |        |       |        |        |        |
| SGO_0476 | 7  | 31.7%    |      |          | 12   | 46.6%    | 9      | 38.1%    | rhodanese family protein                             |       |        |       |        |       |        |        |        |
|          | 6  | 25.0%    | 3    | 15.5%    | 11   | 48.2%    | 7      | 30.5%    |                                                      |       |        |       |        |       |        |        |        |
| SGO_0480 |    |          | 8    | 62.8%    | 3    | 30.7%    |        |          | hypothetical protein SGO_0480                        |       |        |       |        |       |        |        |        |
|          | 3  | 32.8%    | 6    | 58.4%    | 3    | 30.7%    | 3      | 30.7%    |                                                      |       |        |       |        |       |        |        |        |
| SGO_0483 | 11 | 45.7%    | 7    | 37.1%    | 7    | 33.1%    | 5      | 26.2%    | hypothetical protein SGO_0483                        |       |        |       |        |       |        |        |        |
|          | 10 | 40.1%    | 5    | 33.8%    | 12   | 55.3%    | 7      | 32.1%    |                                                      |       |        |       |        |       |        |        |        |

 Show detected proteins only Show all proteins

Proteins found:

1179

 Filter by category:

ABC Transporter

Dot Plots Dot Plots

Summary Table

SgFn vs Sg

SgPg vs Sg

SgPgFn vs Sg

SgPg vs SgFn

SgPgFn vs SgFn

SgPgFn vs SgPg

Coverage

Sg

SgFn

SgPg

SgPgFn

Description

Sg

SgFn

SgPg

SgPgFn

Protein

n Coverage

n Coverage

n Coverage

n Coverage

Rep I Rep II

Rep I Rep II

Rep I Rep II

Rep I Rep II

| Protein  | Sg |          | SgFn |          | SgPg |          | SgPgFn |          | Description                                            | Sg    |        | SgFn  |        | SgPg  |        | SgPgFn |        |
|----------|----|----------|------|----------|------|----------|--------|----------|--------------------------------------------------------|-------|--------|-------|--------|-------|--------|--------|--------|
|          | n  | Coverage | n    | Coverage | n    | Coverage | n      | Coverage |                                                        | Rep I | Rep II | Rep I | Rep II | Rep I | Rep II | Rep I  | Rep II |
| SGO_0484 | 5  | 18.0%    | 4    | 12.9%    |      |          |        |          | sensor histidine kinase                                |       |        |       |        |       |        |        |        |
|          | 6  | 18.5%    |      |          |      |          |        |          |                                                        |       |        |       |        |       |        |        |        |
| SGO_0488 | 19 | 39.8%    | 4    | 10.9%    | 8    | 21.9%    |        |          | ABC transporter, ATP-binding protein SP0483            |       |        |       |        |       |        |        |        |
|          | 18 | 35.7%    | 7    | 21.9%    | 6    | 19.1%    |        |          |                                                        |       |        |       |        |       |        |        |        |
| SGO_0491 |    |          | 5    | 31.6%    | 4    | 21.1%    |        |          | gidB; methyltransferase GidB                           |       |        |       |        |       |        |        |        |
|          |    |          | 4    | 22.4%    | 4    | 26.6%    |        |          |                                                        |       |        |       |        |       |        |        |        |
| SGO_0494 | 5  | 27.5%    | 15   | 72.0%    | 8    | 51.3%    |        |          | lemA; LemA-like protein                                |       |        |       |        |       |        |        |        |
|          | 8  | 50.8%    | 11   | 68.3%    | 9    | 53.4%    |        |          |                                                        |       |        |       |        |       |        |        |        |
| SGO_0495 | 4  | 21.2%    | 4    | 23.2%    | 3    | 19.2%    |        |          | htpx; heat shock protein                               |       |        |       |        |       |        |        |        |
|          | 6  | 28.6%    | 5    | 32.3%    |      |          |        |          |                                                        |       |        |       |        |       |        |        |        |
| SGO_0497 |    |          | 44   | 38.3%    |      |          | 3      | 2.5%     | gtfG; glucosyltransferase G                            |       |        |       |        |       |        |        |        |
|          |    |          | 45   | 39.5%    |      |          |        |          |                                                        |       |        |       |        |       |        |        |        |
| SGO_0500 | 3  | 12.1%    |      |          |      |          |        |          | rggD; putative transcriptional regulator RggD          |       |        |       |        |       |        |        |        |
| SGO_0501 | 7  | 43.2%    |      |          | 8    | 43.2%    | 6      | 34.1%    | Uncharacterized ACR, COG1399                           |       |        |       |        |       |        |        |        |
|          | 8  | 50.0%    | 3    | 22.7%    | 7    | 43.2%    | 6      | 34.1%    |                                                        |       |        |       |        |       |        |        |        |
| SGO_0502 | 29 | 58.4%    | 20   | 47.5%    | 25   | 56.2%    | 22     | 51.1%    | floL; flotillin-like protein                           |       |        |       |        |       |        |        |        |
|          | 34 | 61.9%    | 15   | 37.1%    | 27   | 57.6%    | 21     | 51.9%    |                                                        |       |        |       |        |       |        |        |        |
| SGO_0503 | 23 | 62.2%    | 33   | 77.6%    | 28   | 74.3%    | 25     | 69.2%    | gnd; 6-phosphogluconate dehydrogenase, decarboxylating |       |        |       |        |       |        |        |        |
|          | 27 | 65.2%    | 32   | 81.9%    | 31   | 78.7%    | 27     | 66.9%    |                                                        |       |        |       |        |       |        |        |        |
| SGO_0505 | 21 | 35.2%    | 16   | 34.2%    | 16   | 31.0%    | 10     | 21.6%    | PTS system, IIBC component                             |       |        |       |        |       |        |        |        |
|          | 22 | 37.5%    | 14   | 31.8%    | 20   | 36.2%    | 11     | 23.6%    |                                                        |       |        |       |        |       |        |        |        |
| SGO_0506 |    |          |      |          |      |          |        |          | rgfB; RgfB                                             |       |        |       |        |       |        |        |        |
|          | 3  | 15.5%    |      |          | 3    | 14.8%    |        |          |                                                        |       |        |       |        |       |        |        |        |

 Show detected proteins only Show all proteins Filter by category:

ABC Transporter

Proteins found:

1179

Dot Plots Dot Plots

Summary Table

SgFn vs Sg

SgPg vs Sg

SgPgFn vs Sg

SgPg vs SgFn

SgPgFn vs SgFn

SgPgFn vs SgPg

Coverage

Sg

SgFn

SgPg

SgPgFn

Description

Sg

SgFn

SgPg

SgPgFn

| Protein  | Sg |          | SgFn |          | SgPg |          | SgPgFn |          | Description                                                               | Sg    |        | SgFn  |        | SgPg  |        | SgPgFn |        |
|----------|----|----------|------|----------|------|----------|--------|----------|---------------------------------------------------------------------------|-------|--------|-------|--------|-------|--------|--------|--------|
|          | n  | Coverage | n    | Coverage | n    | Coverage | n      | Coverage |                                                                           | Rep I | Rep II | Rep I | Rep II | Rep I | Rep II | Rep I  | Rep II |
| SGO_0508 | 3  | 19.7%    | 4    | 22.3%    | 3    | 19.7%    | 3      | 19.7%    | nrdR; transcriptional regulator, NrdR family                              |       |        |       |        |       |        |        |        |
|          | 3  | 19.7%    |      |          | 3    | 19.7%    | 4      | 22.3%    |                                                                           |       |        |       |        |       |        |        |        |
| SGO_0509 | 5  | 16.9%    |      |          |      |          |        |          | Replication initiation and membrane attachment protein (DnaB) superfamily |       |        |       |        |       |        |        |        |
|          | 10 | 23.7%    |      |          | 4    | 11.5%    |        |          |                                                                           |       |        |       |        |       |        |        |        |
| SGO_0510 | 7  | 30.1%    | 8    | 31.1%    | 13   | 60.2%    | 8      | 34.4%    | dnaI; primosomal protein DnaI                                             |       |        |       |        |       |        |        |        |
|          | 7  | 26.1%    | 7    | 34.4%    | 10   | 37.8%    | 6      | 15.1%    |                                                                           |       |        |       |        |       |        |        |        |
| SGO_0511 | 3  | 16.4%    | 6    | 38.2%    | 5    | 29.4%    | 3      | 17.2%    | NADPH-flavin oxidoreductase -like protein                                 |       |        |       |        |       |        |        |        |
|          | 8  | 36.6%    | 7    | 42.9%    | 7    | 34.9%    | 3      | 17.2%    |                                                                           |       |        |       |        |       |        |        |        |
| SGO_0512 | 13 | 35.1%    | 11   | 31.0%    | 11   | 34.2%    | 10     | 33.5%    | GTP-binding protein engA                                                  |       |        |       |        |       |        |        |        |
|          | 17 | 42.0%    | 8    | 27.8%    | 11   | 36.9%    | 10     | 32.8%    |                                                                           |       |        |       |        |       |        |        |        |
| SGO_0513 |    |          | 6    | 10.2%    |      |          |        |          | Snf2 family protein                                                       |       |        |       |        |       |        |        |        |
|          | 4  | 5.3%     | 3    | 4.6%     |      |          |        |          |                                                                           |       |        |       |        |       |        |        |        |
| SGO_0514 |    |          |      |          | 4    | 14.4%    |        |          | hypothetical protein SGO_0514                                             |       |        |       |        |       |        |        |        |
|          |    |          |      |          | 4    | 24.6%    |        |          |                                                                           |       |        |       |        |       |        |        |        |
| SGO_0515 | 12 | 35.4%    | 16   | 47.4%    | 15   | 50.3%    | 8      | 26.0%    | murC; UDP-N-acetylmuramate--alanine ligase                                |       |        |       |        |       |        |        |        |
|          | 14 | 41.5%    | 15   | 51.5%    | 15   | 50.3%    | 9      | 31.8%    |                                                                           |       |        |       |        |       |        |        |        |
| SGO_0518 | 21 | 48.4%    | 9    | 21.0%    | 15   | 42.7%    | 10     | 26.3%    | aminodeoxychorismate lyase-like protein                                   |       |        |       |        |       |        |        |        |
|          | 26 | 51.4%    | 8    | 23.2%    | 17   | 45.9%    | 9      | 26.9%    |                                                                           |       |        |       |        |       |        |        |        |
| SGO_0519 | 8  | 51.3%    | 6    | 61.9%    | 10   | 71.3%    | 5      | 51.3%    | greA; transcription elongation factor greA                                |       |        |       |        |       |        |        |        |
|          | 10 | 58.1%    | 4    | 39.4%    | 9    | 58.8%    | 6      | 53.1%    |                                                                           |       |        |       |        |       |        |        |        |
| SGO_0521 | 5  | 18.7%    | 3    | 8.4%     | 3    | 8.4%     |        |          | Membrane protein oxaA 2 precursor                                         |       |        |       |        |       |        |        |        |
|          | 7  | 22.6%    |      |          | 3    | 11.0%    |        |          |                                                                           |       |        |       |        |       |        |        |        |
| SGO_0523 |    |          | 7    | 52.4%    | 6    | 34.6%    |        |          | spoU rRNA Methylase family protein                                        |       |        |       |        |       |        |        |        |
|          | 6  | 33.7%    | 9    | 59.3%    | 4    | 26.4%    |        |          |                                                                           |       |        |       |        |       |        |        |        |

 Show detected proteins only Show all proteins Filter by category:

ABC Transporter

Proteins found:

1179

Dot Plots Dot Plots

Summary Table SgFn vs Sg SgPg vs Sg SgPgFn vs Sg SgPg vs SgFn SgPgFn vs SgFn SgPgFn vs SgPg Coverage

| Protein  | Sg |          | SgFn |          | SgPg |          | SgPgFn |          | Description                                                   | Sg    |        | SgFn  |        | SgPg  |        | SgPgFn |        |
|----------|----|----------|------|----------|------|----------|--------|----------|---------------------------------------------------------------|-------|--------|-------|--------|-------|--------|--------|--------|
|          | n  | Coverage | n    | Coverage | n    | Coverage | n      | Coverage |                                                               | Rep I | Rep II | Rep I | Rep II | Rep I | Rep II | Rep I  | Rep II |
| SGO_0526 | 11 | 29.4%    | 6    | 14.2%    | 12   | 31.5%    | 3      | 5.4%     | ilvB; acetolactate synthase, large subunit, biosynthetic type |       |        |       |        |       |        |        |        |
|          | 13 | 29.6%    | 9    | 19.4%    | 13   | 28.9%    | 4      | 9.6%     |                                                               |       |        |       |        |       |        |        |        |
| SGO_0527 | 4  | 25.3%    | 3    | 25.9%    | 3    | 19.0%    |        |          | ilvN; acetolactate synthase, small subunit                    |       |        |       |        |       |        |        |        |
|          | 5  | 32.3%    | 3    | 12.7%    | 3    | 20.3%    | 3      | 20.9%    |                                                               |       |        |       |        |       |        |        |        |
| SGO_0528 | 12 | 40.9%    | 14   | 42.9%    | 16   | 50.6%    | 10     | 38.5%    | ilvC; ketol-acid reductoisomerase                             |       |        |       |        |       |        |        |        |
|          | 13 | 43.2%    | 14   | 42.4%    | 17   | 50.9%    | 10     | 33.2%    |                                                               |       |        |       |        |       |        |        |        |
| SGO_0529 | 3  | 11.5%    | 5    | 16.8%    | 6    | 28.1%    |        |          | ilvA; threonine dehydratase                                   |       |        |       |        |       |        |        |        |
|          | 7  | 19.2%    | 7    | 26.9%    | 7    | 27.6%    | 3      | 12.5%    |                                                               |       |        |       |        |       |        |        |        |
| SGO_0530 | 6  | 33.3%    | 5    | 29.6%    | 4    | 27.8%    |        |          | Cof family protein                                            |       |        |       |        |       |        |        |        |
|          | 7  | 37.8%    | 7    | 40.0%    | 6    | 33.3%    |        |          |                                                               |       |        |       |        |       |        |        |        |
| SGO_0533 | 3  | 18.8%    | 3    | 21.3%    |      |          |        |          | conserved hypothetical protein TIGR00150                      |       |        |       |        |       |        |        |        |
| SGO_0535 | 10 | 33.3%    | 4    | 16.4%    | 4    | 16.9%    | 3      | 12.4%    | putative transcriptional regulator LytR                       |       |        |       |        |       |        |        |        |
|          | 13 | 40.2%    |      |          | 5    | 18.9%    |        |          |                                                               |       |        |       |        |       |        |        |        |
| SGO_0536 | 6  | 60.0%    |      |          | 7    | 73.0%    | 7      | 79.0%    | hypothetical protein SGO_0536                                 |       |        |       |        |       |        |        |        |
|          | 6  | 60.0%    |      |          | 6    | 60.0%    | 4      | 57.0%    |                                                               |       |        |       |        |       |        |        |        |
| SGO_0537 | 4  | 38.7%    | 3    | 32.9%    | 4    | 38.7%    | 4      | 42.8%    | HIT family protein                                            |       |        |       |        |       |        |        |        |
|          | 6  | 43.4%    | 4    | 50.9%    | 4    | 38.7%    | 5      | 44.5%    |                                                               |       |        |       |        |       |        |        |        |
| SGO_0538 | 8  | 39.9%    | 6    | 28.0%    | 4    | 20.2%    |        |          | ABC transporter, ATP-binding protein SP0522                   |       |        |       |        |       |        |        |        |
|          | 7  | 39.9%    | 8    | 31.7%    | 4    | 22.2%    |        |          |                                                               |       |        |       |        |       |        |        |        |
| SGO_0539 | 6  | 13.1%    |      |          |      |          |        |          | ABC transporter, permease protein                             |       |        |       |        |       |        |        |        |
|          | 7  | 16.5%    |      |          |      |          |        |          |                                                               |       |        |       |        |       |        |        |        |
| SGO_0540 | 11 | 55.7%    | 12   | 58.0%    | 14   | 73.5%    | 10     | 47.3%    | hypothetical protein SGO_0540                                 |       |        |       |        |       |        |        |        |
|          | 11 | 53.0%    | 13   | 59.1%    | 12   | 59.5%    | 10     | 46.2%    |                                                               |       |        |       |        |       |        |        |        |

Show detected proteins only  
 Show all proteins  
 Filter by category:

Proteins found: 1179

Dot Plots Dot Plots

Summary Table

SgFn vs Sg

SgPg vs Sg

SgPgFn vs Sg

SgPg vs SgFn

SgPgFn vs SgFn

SgPgFn vs SgPg

Coverage

Sg

SgFn

SgPg

SgPgFn

Description

Sg

SgFn

SgPg

SgPgFn

Protein

n Coverage

n Coverage

n Coverage

n Coverage

Rep I Rep II

Rep I Rep II

Rep I Rep II

Rep I Rep II

SGO\_0541

6

36.3%

5

32.1%

4

20.3%

methyltransferase, putative

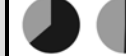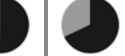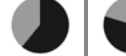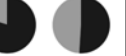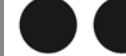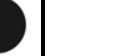

SGO\_0542

3

14.2%

5

39.2%

4

24.7%

hypothetical protein SGO\_0542

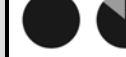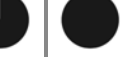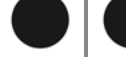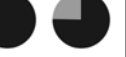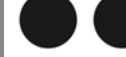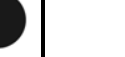

SGO\_0543

17

40.0%

9

26.9%

15

37.0%

10

27.6%

nusA; transcription termination factor NusA

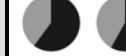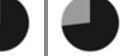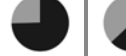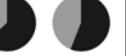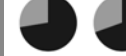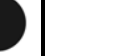

SGO\_0544

3

24.5%

15

37.0%

10

27.6%

Protein of unknown function (DUF448) superfamily

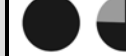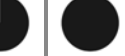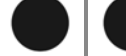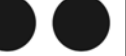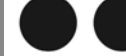

SGO\_0545

3

39.4%

15

37.0%

10

27.6%

ribosomal protein L7A family

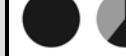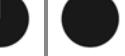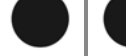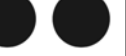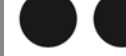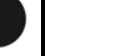

SGO\_0546

25

33.4%

22

29.9%

26

31.5%

15

22.1%

infB; Translation initiation factor IF-2

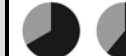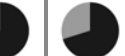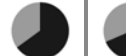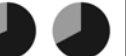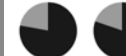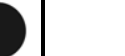

SGO\_0547

3

36.5%

15

37.0%

10

27.6%

rbfA; ribosome-binding factor A

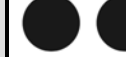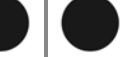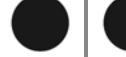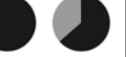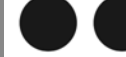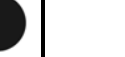

SGO\_0548

12

27.4%

7

14.7%

4

9.0%

Na/Pi-cotransporter family protein

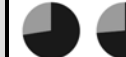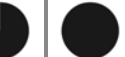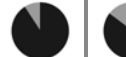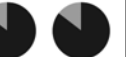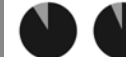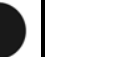

SGO\_0549

3

14.4%

3

11.0%

15

33.8%

nagA; N-acetylglucosamine-6-phosphate deacetylase

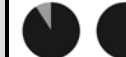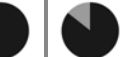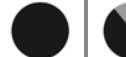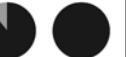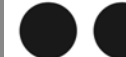

SGO\_0552

4

20.6%

15

67.3%

10

53.0%

6

33.8%

oxidoreductase, aldo/keto reductase family

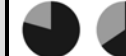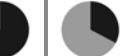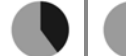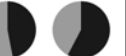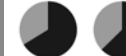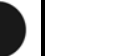

SGO\_0554

19

15.4%

8

12.2%

4

5.8%

hsdR; type I site-specific deoxyribonuclease

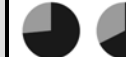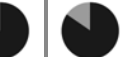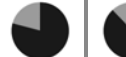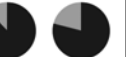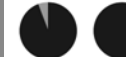

SGO\_0556

6

7.0%

5

8.5%

15

33.8%

DNA helicase-like protein, putative

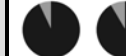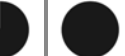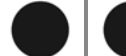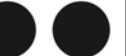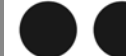 Show detected proteins only Show all proteins

Proteins found:

1179

 Filter by category:

ABC Transporter

Dot Plots Dot Plots

Summary Table

SgFn vs Sg

SgPg vs Sg

SgPgFn vs Sg

SgPg vs SgFn

SgPgFn vs SgFn

SgPgFn vs SgPg

Coverage

| Protein         | Sg |          | SgFn |          | SgPg |          | SgPgFn |          | Description                                                        | Sg    |        | SgFn  |        | SgPg  |        | SgPgFn |        |
|-----------------|----|----------|------|----------|------|----------|--------|----------|--------------------------------------------------------------------|-------|--------|-------|--------|-------|--------|--------|--------|
|                 | n  | Coverage | n    | Coverage | n    | Coverage | n      | Coverage |                                                                    | Rep I | Rep II | Rep I | Rep II | Rep I | Rep II | Rep I  | Rep II |
| <b>SGO_0557</b> | 4  | 13.9%    |      |          |      |          |        |          | HsdS specificity protein of type I restriction-modification system |       |        |       |        |       |        |        |        |
| <b>SGO_0558</b> | 5  | 32.7%    | 3    | 20.5%    | 3    | 20.9%    | 3      | 18.5%    | hypothetical protein SGO_0558                                      |       |        |       |        |       |        |        |        |
| <b>SGO_0560</b> | 6  | 20.7%    |      |          | 5    | 18.1%    | 5      | 17.8%    | hsdM; type I restriction-modification system, M subunit            |       |        |       |        |       |        |        |        |
|                 | 7  | 18.1%    | 3    | 12.1%    | 4    | 15.7%    | 4      | 15.3%    |                                                                    |       |        |       |        |       |        |        |        |
| <b>SGO_0565</b> | 14 | 70.0%    | 19   | 73.2%    | 14   | 60.3%    | 11     | 46.8%    | adhA; alcohol dehydrogenase                                        |       |        |       |        |       |        |        |        |
|                 | 18 | 74.7%    | 18   | 72.6%    | 12   | 60.3%    | 11     | 52.4%    |                                                                    |       |        |       |        |       |        |        |        |
| <b>SGO_0566</b> | 34 | 28.4%    | 23   | 21.9%    |      |          |        |          | sgc; serine protease challisin                                     |       |        |       |        |       |        |        |        |
|                 | 43 | 32.7%    | 23   | 23.1%    |      |          |        |          |                                                                    |       |        |       |        |       |        |        |        |
| <b>SGO_0568</b> | 9  | 41.6%    | 6    | 25.6%    | 11   | 42.3%    | 7      | 28.9%    | glyQ; glycyl-tRNA synthetase, alpha subunit                        |       |        |       |        |       |        |        |        |
|                 | 8  | 36.1%    | 5    | 19.0%    | 12   | 51.1%    | 9      | 35.1%    |                                                                    |       |        |       |        |       |        |        |        |
| <b>SGO_0569</b> | 21 | 35.3%    | 19   | 34.8%    | 27   | 49.5%    | 19     | 33.3%    | glyS; glycyl-tRNA synthetase, beta subunit                         |       |        |       |        |       |        |        |        |
|                 | 23 | 35.9%    | 16   | 30.0%    | 27   | 47.4%    | 22     | 40.8%    |                                                                    |       |        |       |        |       |        |        |        |
| <b>SGO_0570</b> |    |          |      |          | 3    | 29.4%    |        |          | hypothetical protein SGO_0570                                      |       |        |       |        |       |        |        |        |
|                 | 4  | 37.6%    |      |          | 3    | 29.4%    |        |          |                                                                    |       |        |       |        |       |        |        |        |
| <b>SGO_0571</b> | 3  | 7.8%     |      |          |      |          |        |          | hypothetical protein SGO_0571                                      |       |        |       |        |       |        |        |        |
| <b>SGO_0573</b> | 7  | 36.4%    | 5    | 23.7%    | 6    | 32.3%    | 3      | 18.4%    | mraW; S-adenosyl-methyltransferase MraW                            |       |        |       |        |       |        |        |        |
|                 | 10 | 50.6%    | 5    | 28.5%    | 6    | 33.5%    | 4      | 19.0%    |                                                                    |       |        |       |        |       |        |        |        |
| <b>SGO_0575</b> | 25 | 47.8%    |      |          | 3    | 5.6%     |        |          | pbp2X; penicillin-binding protein 2X                               |       |        |       |        |       |        |        |        |
|                 | 23 | 46.7%    |      |          | 3    | 6.5%     |        |          |                                                                    |       |        |       |        |       |        |        |        |
| <b>SGO_0576</b> | 3  | 11.0%    |      |          |      |          |        |          | mraY; phospho-N-acetylmuramoyl-pentapeptide-transferase            |       |        |       |        |       |        |        |        |

- Show detected proteins only
- Show all proteins

Proteins found:  
1179

Filter by category:

ABC Transporter

Dot Plots Dot Plots

Summary Table

SgFn vs Sg

SgPg vs Sg

SgPgFn vs Sg

SgPg vs SgFn

SgPgFn vs SgFn

SgPgFn vs SgPg

Coverage

| Protein  | <i>Sg</i> |          | <i>SgFn</i> |          | <i>SgPg</i> |          | <i>SgPgFn</i> |          | Description                                    | <i>Sg</i> |        | <i>SgFn</i> |        | <i>SgPg</i> |        | <i>SgPgFn</i> |        |
|----------|-----------|----------|-------------|----------|-------------|----------|---------------|----------|------------------------------------------------|-----------|--------|-------------|--------|-------------|--------|---------------|--------|
|          | n         | Coverage | n           | Coverage | n           | Coverage | n             | Coverage |                                                | Rep I     | Rep II | Rep I       | Rep II | Rep I       | Rep II | Rep I         | Rep II |
| SGO_0577 | 14        | 42.1%    | 12          | 35.6%    | 16          | 46.3%    | 8             | 26.8%    | ATP-dependent RNA helicase                     |           |        |             |        |             |        |               |        |
|          | 17        | 45.2%    | 10          | 27.5%    | 17          | 52.3%    | 6             | 21.3%    |                                                |           |        |             |        |             |        |               |        |
| SGO_0578 | 5         | 24.5%    |             |          |             |          |               |          | amino acid ABC transporter permease protein    |           |        |             |        |             |        |               |        |
|          | 6         | 29.7%    |             |          |             |          |               |          |                                                |           |        |             |        |             |        |               |        |
| SGO_0579 | 8         | 54.3%    | 3           | 24.7%    | 9           | 51.8%    |               |          | amino acid ABC transporter ATP binding protein |           |        |             |        |             |        |               |        |
|          | 12        | 63.2%    | 3           | 21.9%    | 4           | 28.7%    |               |          |                                                |           |        |             |        |             |        |               |        |
| SGO_0581 | 7         | 25.7%    | 5           | 24.3%    | 6           | 29.9%    | 6             | 25.0%    | trxB; thioredoxin-disulfide reductase          |           |        |             |        |             |        |               |        |
|          | 8         | 29.9%    | 5           | 17.8%    | 9           | 38.5%    | 4             | 16.1%    |                                                |           |        |             |        |             |        |               |        |
| SGO_0582 | 14        | 28.2%    | 22          | 48.8%    | 17          | 45.9%    | 8             | 23.5%    | nicotinate phosphoribosyltransferase, putative |           |        |             |        |             |        |               |        |
|          | 16        | 35.2%    | 18          | 39.9%    | 19          | 47.3%    | 12            | 34.4%    |                                                |           |        |             |        |             |        |               |        |
| SGO_0583 | 6         | 29.9%    | 7           | 29.6%    | 9           | 42.3%    | 4             | 19.3%    | nadE; NAD+ synthetase                          |           |        |             |        |             |        |               |        |
|          | 5         | 23.4%    | 7           | 32.1%    | 6           | 29.2%    | 5             | 25.5%    |                                                |           |        |             |        |             |        |               |        |
| SGO_0585 | 6         | 21.2%    | 22          | 53.2%    | 11          | 37.6%    | 6             | 21.8%    | pepC; aminopeptidase C                         |           |        |             |        |             |        |               |        |
|          | 13        | 30.2%    | 16          | 44.6%    | 13          | 39.6%    | 5             | 20.9%    |                                                |           |        |             |        |             |        |               |        |
| SGO_0586 | 26        | 50.0%    | 13          | 20.8%    | 19          | 41.6%    | 9             | 21.8%    | pbp1a; penicillin-binding protein 1A           |           |        |             |        |             |        |               |        |
|          | 26        | 48.5%    | 12          | 23.3%    | 17          | 35.0%    | 12            | 25.7%    |                                                |           |        |             |        |             |        |               |        |
| SGO_0589 | 6         | 61.2%    | 4           | 52.6%    | 6           | 61.2%    | 5             | 61.2%    | methylase                                      |           |        |             |        |             |        |               |        |
|          | 6         | 61.2%    | 4           | 45.7%    | 6           | 61.2%    | 6             | 61.2%    |                                                |           |        |             |        |             |        |               |        |
| SGO_0590 | 7         | 23.2%    | 9           | 22.9%    | 7           | 18.8%    | 4             | 12.6%    | Methyltransferase                              |           |        |             |        |             |        |               |        |
|          | 10        | 25.0%    | 10          | 26.0%    | 7           | 20.9%    |               |          |                                                |           |        |             |        |             |        |               |        |
| SGO_0591 | 24        | 60.3%    | 11          | 39.7%    | 14          | 40.8%    | 7             | 23.7%    | hypothetical protein SGO_0591                  |           |        |             |        |             |        |               |        |
|          | 26        | 60.7%    | 9           | 26.9%    | 15          | 44.7%    | 8             | 19.9%    |                                                |           |        |             |        |             |        |               |        |
| SGO_0592 | 5         | 30.6%    | 3           | 18.1%    | 7           | 56.9%    | 5             | 33.8%    | luxS; autoinducer-2 production protein LuxS    |           |        |             |        |             |        |               |        |
|          | 4         | 25.6%    | 4           | 34.4%    | 7           | 55.6%    |               |          |                                                |           |        |             |        |             |        |               |        |

 Show detected proteins only Show all proteins Filter by category:

ABC Transporter

Proteins found:

1179

Dot Plots Dot Plots



Summary Table

SgFn vs Sg

SgPg vs Sg

SgPgFn vs Sg

SgPg vs SgFn

SgPgFn vs SgFn

SgPgFn vs SgPg

Coverage

| Protein  | <i>Sg</i> |          | <i>SgFn</i> |          | <i>SgPg</i> |          | <i>SgPgFn</i> |          | Description                                                                                   | <i>Sg</i> |        | <i>SgFn</i> |        | <i>SgPg</i> |        | <i>SgPgFn</i> |        |
|----------|-----------|----------|-------------|----------|-------------|----------|---------------|----------|-----------------------------------------------------------------------------------------------|-----------|--------|-------------|--------|-------------|--------|---------------|--------|
|          | n         | Coverage | n           | Coverage | n           | Coverage | n             | Coverage |                                                                                               | Rep I     | Rep II | Rep I       | Rep II | Rep I       | Rep II | Rep I         | Rep II |
| SGO_0593 | 25        | 45.2%    | 8           | 21.3%    | 21          | 43.9%    | 11            | 27.5%    | HD/KH domain protein                                                                          |           |        |             |        |             |        |               |        |
|          | 30        | 47.3%    | 10          | 23.4%    | 20          | 39.3%    | 8             | 16.3%    |                                                                                               |           |        |             |        |             |        |               |        |
| SGO_0594 | 8         | 40.4%    | 8           | 48.1%    | 8           | 48.6%    | 5             | 20.2%    | gmk; Guanylate kinase (GMP kinase)                                                            |           |        |             |        |             |        |               |        |
|          | 8         | 40.4%    | 7           | 41.3%    | 8           | 55.8%    | 5             | 30.3%    |                                                                                               |           |        |             |        |             |        |               |        |
| SGO_0595 | 5         | 43.7%    | 4           | 43.7%    | 6           | 59.2%    | 6             | 58.3%    | DNA-directed RNA polymerase, omega subunit                                                    |           |        |             |        |             |        |               |        |
|          | 6         | 59.2%    | 4           | 43.7%    | 7           | 59.2%    | 6             | 59.2%    |                                                                                               |           |        |             |        |             |        |               |        |
| SGO_0596 | 5         | 8.8%     | 6           | 14.0%    |             |          |               |          | priA; primosomal protein N"                                                                   |           |        |             |        |             |        |               |        |
|          |           |          | 5           | 8.7%     |             |          |               |          |                                                                                               |           |        |             |        |             |        |               |        |
| SGO_0597 | 6         | 32.5%    | 10          | 37.6%    | 11          | 46.9%    | 3             | 14.8%    | fmt; methionyl-tRNA formyltransferase                                                         |           |        |             |        |             |        |               |        |
|          | 6         | 27.7%    | 9           | 39.9%    | 8           | 39.5%    | 3             | 16.7%    |                                                                                               |           |        |             |        |             |        |               |        |
| SGO_0598 | 7         | 20.4%    |             |          | 10          | 30.2%    |               |          | sun; sun protein                                                                              |           |        |             |        |             |        |               |        |
|          | 6         | 17.8%    | 6           | 20.4%    | 6           | 17.4%    |               |          |                                                                                               |           |        |             |        |             |        |               |        |
| SGO_0599 | 11        | 48.0%    | 15          | 64.6%    | 9           | 39.8%    | 5             | 20.3%    | phosphoprotein phosphatase                                                                    |           |        |             |        |             |        |               |        |
|          | 11        | 43.9%    | 13          | 52.4%    | 7           | 35.4%    | 6             | 30.9%    |                                                                                               |           |        |             |        |             |        |               |        |
| SGO_0600 | 22        | 48.8%    | 9           | 19.8%    | 12          | 28.5%    | 5             | 13.6%    | serine/threonine protein kinase                                                               |           |        |             |        |             |        |               |        |
|          | 24        | 52.5%    | 7           | 16.9%    | 12          | 32.4%    |               |          |                                                                                               |           |        |             |        |             |        |               |        |
| SGO_0602 | 7         | 24.0%    |             |          |             |          |               |          | histidine kinase                                                                              |           |        |             |        |             |        |               |        |
|          | 7         | 27.4%    |             |          |             |          |               |          |                                                                                               |           |        |             |        |             |        |               |        |
| SGO_0603 | 4         | 21.5%    | 7           | 35.0%    | 5           | 25.7%    |               |          | response regulator                                                                            |           |        |             |        |             |        |               |        |
|          | 5         | 25.7%    | 6           | 30.8%    | 4           | 20.1%    |               |          |                                                                                               |           |        |             |        |             |        |               |        |
| SGO_0604 | 14        | 46.9%    | 20          | 62.1%    | 18          | 59.3%    | 8             | 19.3%    | hydrolase, haloacid dehalogenase family/peptidyl-prolyl cis-trans isomerase, cyclophilin type |           |        |             |        |             |        |               |        |
|          | 18        | 54.8%    | 21          | 69.0%    | 20          | 63.6%    | 12            | 35.8%    |                                                                                               |           |        |             |        |             |        |               |        |
| SGO_0606 | 17        | 70.2%    | 14          | 77.7%    | 15          | 75.1%    | 16            | 82.5%    | cysK; cysteine synthase A                                                                     |           |        |             |        |             |        |               |        |
|          | 15        | 69.6%    | 13          | 76.7%    | 16          | 81.2%    | 15            | 81.9%    |                                                                                               |           |        |             |        |             |        |               |        |

- Show detected proteins only  
 Show all proteins

Proteins found:  
1179

Filter by category:

ABC Transporter

Dot Plots Dot Plots

Summary Table SgFn vs Sg SgPg vs Sg SgPgFn vs Sg SgPg vs SgFn SgPgFn vs SgFn SgPgFn vs SgPg Coverage

| Protein  | Sg |          | SgFn |          | SgPg |          | SgPgFn |          | Description                                                                     | Sg    |        | SgFn  |        | SgPg  |        | SgPgFn |        |
|----------|----|----------|------|----------|------|----------|--------|----------|---------------------------------------------------------------------------------|-------|--------|-------|--------|-------|--------|--------|--------|
|          | n  | Coverage | n    | Coverage | n    | Coverage | n      | Coverage |                                                                                 | Rep I | Rep II | Rep I | Rep II | Rep I | Rep II | Rep I  | Rep II |
| SGO_0608 | 4  | 13.4%    |      |          |      |          |        |          | comFA; competence ComFA-like protein                                            |       |        |       |        |       |        |        |        |
|          | 4  | 14.1%    |      |          |      |          |        |          |                                                                                 |       |        |       |        |       |        |        |        |
| SGO_0610 | 8  | 48.9%    | 11   | 55.6%    | 9    | 52.8%    | 8      | 51.7%    | ribosomal subunit interface protein                                             |       |        |       |        |       |        |        |        |
|          | 9  | 53.9%    | 9    | 54.4%    | 9    | 52.8%    | 6      | 37.8%    |                                                                                 |       |        |       |        |       |        |        |        |
| SGO_0626 | 7  | 42.2%    | 3    | 13.6%    | 4    | 18.6%    | 3      | 15.5%    | recX; Regulatory protein recX                                                   |       |        |       |        |       |        |        |        |
|          | 4  | 23.6%    |      |          | 5    | 22.9%    |        |          |                                                                                 |       |        |       |        |       |        |        |        |
| SGO_0628 | 3  | 21.1%    |      |          |      |          |        |          | ymdC; 3''-aminoglycoside phosphotransferase-like protein (kanamycin kinase)     |       |        |       |        |       |        |        |        |
| SGO_0629 | 4  | 15.9%    |      |          | 3    | 10.6%    |        |          | rumA-1; 23S rRNA (uracil-5-)-methyltransferase RumA                             |       |        |       |        |       |        |        |        |
|          | 6  | 23.1%    |      |          |      |          |        |          |                                                                                 |       |        |       |        |       |        |        |        |
| SGO_0631 | 4  | 10.0%    | 4    | 9.4%     | 18   | 36.2%    | 6      | 14.6%    | alpha-glycerophosphate oxidase                                                  |       |        |       |        |       |        |        |        |
|          |    |          |      |          | 17   | 36.7%    | 5      | 10.0%    |                                                                                 |       |        |       |        |       |        |        |        |
| SGO_0632 |    |          |      |          | 6    | 17.9%    | 5      | 19.9%    | glpK; glycerol kinase                                                           |       |        |       |        |       |        |        |        |
|          |    |          |      |          | 6    | 18.9%    | 4      | 13.9%    |                                                                                 |       |        |       |        |       |        |        |        |
| SGO_0635 | 5  | 21.4%    | 4    | 17.4%    |      |          |        |          | hypothetical protein SGO_0635                                                   |       |        |       |        |       |        |        |        |
| SGO_0636 | 3  | 41.4%    |      |          |      |          |        |          | hypothetical protein SGO_0636                                                   |       |        |       |        |       |        |        |        |
|          | 3  | 39.1%    |      |          |      |          |        |          |                                                                                 |       |        |       |        |       |        |        |        |
| SGO_0639 | 23 | 35.6%    | 16   | 27.8%    | 30   | 46.0%    | 19     | 31.3%    | valS; valyl-tRNA synthetase                                                     |       |        |       |        |       |        |        |        |
|          | 23 | 38.5%    | 19   | 37.8%    | 29   | 44.4%    | 17     | 28.9%    |                                                                                 |       |        |       |        |       |        |        |        |
| SGO_0640 | 4  | 17.7%    |      |          | 4    | 12.6%    |        |          | modification methylase                                                          |       |        |       |        |       |        |        |        |
|          | 4  | 16.2%    |      |          | 3    | 13.4%    | 4      | 14.3%    |                                                                                 |       |        |       |        |       |        |        |        |
| SGO_0641 | 17 | 30.0%    | 17   | 34.6%    | 21   | 40.1%    | 9      | 16.9%    | ATPase, histidine kinase-, DNA gyrase B-, and HSP90-like domain protein protein |       |        |       |        |       |        |        |        |
|          | 15 | 27.8%    | 13   | 24.5%    | 18   | 37.7%    | 6      | 11.0%    |                                                                                 |       |        |       |        |       |        |        |        |

Show detected proteins only  
 Show all proteins  
 Filter by category:

Proteins found: 1179

[Dot Plots](#) [Dot Plots](#)

Summary Table SgFn vs Sg SgPg vs Sg SgPgFn vs Sg SgPg vs SgFn SgPgFn vs SgFn SgPgFn vs SgPg Coverage

| Protein  | Sg |          | SgFn |          | SgPg |          | SgPgFn |          | Description                                                  | Sg    |        | SgFn  |        | SgPg  |        | SgPgFn |        |
|----------|----|----------|------|----------|------|----------|--------|----------|--------------------------------------------------------------|-------|--------|-------|--------|-------|--------|--------|--------|
|          | n  | Coverage | n    | Coverage | n    | Coverage | n      | Coverage |                                                              | Rep I | Rep II | Rep I | Rep II | Rep I | Rep II | Rep I  | Rep II |
| SGO_0642 | 15 | 35.5%    | 5    | 14.7%    | 10   | 23.4%    | 7      | 21.2%    | hypothetical protein SGO_0642                                |       |        |       |        |       |        |        |        |
|          | 19 | 37.2%    | 4    | 11.8%    | 10   | 24.4%    | 6      | 15.9%    |                                                              |       |        |       |        |       |        |        |        |
| SGO_0643 | 8  | 24.6%    | 3    | 12.1%    | 5    | 15.0%    | 3      | 8.9%     | cytosine-specific methyltransferase                          |       |        |       |        |       |        |        |        |
|          | 7  | 24.6%    | 3    | 9.9%     | 7    | 25.9%    |        |          |                                                              |       |        |       |        |       |        |        |        |
| SGO_0644 | 9  | 28.1%    | 7    | 20.5%    | 16   | 42.5%    | 9      | 30.6%    | hypothetical protein SGO_0644                                |       |        |       |        |       |        |        |        |
|          | 11 | 34.3%    | 8    | 23.7%    | 14   | 39.1%    | 11     | 34.0%    |                                                              |       |        |       |        |       |        |        |        |
| SGO_0649 |    |          |      |          |      |          |        |          | hypothetical protein SGO_0649                                |       |        |       |        |       |        |        |        |
|          | 3  | 19.1%    |      |          |      |          |        |          |                                                              |       |        |       |        |       |        |        |        |
| SGO_0652 | 16 | 39.5%    | 3    | 11.8%    | 7    | 21.6%    | 4      | 13.8%    | hypothetical protein SGO_0652                                |       |        |       |        |       |        |        |        |
|          | 19 | 48.7%    | 4    | 14.7%    | 4    | 15.3%    | 4      | 11.0%    |                                                              |       |        |       |        |       |        |        |        |
| SGO_0653 |    |          |      |          | 4    | 24.2%    |        |          | conserved hypothetical protein of unknown function (DUF1027) |       |        |       |        |       |        |        |        |
|          | 5  | 28.1%    |      |          | 3    | 19.1%    |        |          |                                                              |       |        |       |        |       |        |        |        |
| SGO_0654 | 13 | 48.1%    | 4    | 17.7%    | 10   | 35.4%    | 6      | 21.3%    | radical SAM enzyme, Cfr family                               |       |        |       |        |       |        |        |        |
|          | 20 | 53.9%    |      |          | 10   | 35.4%    | 5      | 18.2%    |                                                              |       |        |       |        |       |        |        |        |
| SGO_0656 | 7  | 23.9%    | 8    | 29.0%    | 5    | 20.4%    | 5      | 18.6%    | trpB-2; tryptophan synthase, beta subunit                    |       |        |       |        |       |        |        |        |
|          | 8  | 28.8%    | 10   | 30.5%    | 6    | 22.4%    | 4      | 17.6%    |                                                              |       |        |       |        |       |        |        |        |
| SGO_0657 |    |          |      |          |      |          |        |          | trpE; anthranilate synthase component I                      |       |        |       |        |       |        |        |        |
|          | 4  | 10.0%    |      |          |      |          |        |          |                                                              |       |        |       |        |       |        |        |        |
| SGO_0662 |    |          | 5    | 19.9%    |      |          |        |          | trpB-1; tryptophan synthase, beta subunit                    |       |        |       |        |       |        |        |        |
|          | 3  | 9.8%     | 3    | 10.3%    |      |          |        |          |                                                              |       |        |       |        |       |        |        |        |
| SGO_0663 |    |          |      |          |      |          |        |          | trpA-2; tryptophan synthase, alpha subunit                   |       |        |       |        |       |        |        |        |
|          | 3  | 13.1%    |      |          |      |          |        |          |                                                              |       |        |       |        |       |        |        |        |
| SGO_0665 | 9  | 71.3%    | 8    | 66.7%    | 8    | 66.7%    | 6      | 53.8%    | non-heme iron-containing ferritin                            |       |        |       |        |       |        |        |        |
|          | 8  | 66.7%    | 10   | 74.3%    | 8    | 64.3%    | 6      | 53.8%    |                                                              |       |        |       |        |       |        |        |        |

Show detected proteins only  
 Show all proteins  
 Filter by category:

Proteins found: 1179

Dot Plots Dot Plots

Summary Table

SgFn vs Sg

SgPg vs Sg

SgPgFn vs Sg

SgPg vs SgFn

SgPgFn vs SgFn

SgPgFn vs SgPg

Coverage

Sg

SgFn

SgPg

SgPgFn

Description

Sg

SgFn

SgPg

SgPgFn

Protein

n Coverage

n Coverage

n Coverage

n Coverage

Rep I Rep II

Rep I Rep II

Rep I Rep II

Rep I Rep II

| Protein  | Sg |          | SgFn |          | SgPg |          | SgPgFn |          | Description                                                            | Sg    |        | SgFn  |        | SgPg  |        | SgPgFn |        |
|----------|----|----------|------|----------|------|----------|--------|----------|------------------------------------------------------------------------|-------|--------|-------|--------|-------|--------|--------|--------|
|          | n  | Coverage | n    | Coverage | n    | Coverage | n      | Coverage |                                                                        | Rep I | Rep II | Rep I | Rep II | Rep I | Rep II | Rep I  | Rep II |
| SGO_0667 | 4  | 38.3%    |      |          | 4    | 38.3%    |        |          | rhodanese family protein                                               |       |        |       |        |       |        |        |        |
|          | 5  | 39.1%    |      |          | 3    | 29.7%    |        |          |                                                                        |       |        |       |        |       |        |        |        |
| SGO_0669 | 15 | 33.3%    | 12   | 27.6%    | 18   | 35.1%    | 14     | 30.1%    | typA; GTP-binding protein TypA                                         |       |        |       |        |       |        |        |        |
|          | 16 | 35.8%    | 17   | 38.2%    | 16   | 34.8%    | 12     | 26.7%    |                                                                        |       |        |       |        |       |        |        |        |
| SGO_0671 | 11 | 31.6%    | 19   | 58.4%    | 18   | 54.0%    | 3      | 13.6%    | murD; UDP-N-acetylmuramoylalanine--D-glutamate ligase                  |       |        |       |        |       |        |        |        |
|          | 15 | 39.1%    | 14   | 46.7%    | 17   | 51.3%    | 5      | 17.3%    |                                                                        |       |        |       |        |       |        |        |        |
| SGO_0672 | 18 | 61.5%    | 8    | 32.6%    | 7    | 28.4%    | 3      | 9.6%     | murG; undecaprenyl-PP-MurNAc-pentapeptide-UDPGlcNAc GlcNAc transferase |       |        |       |        |       |        |        |        |
|          | 16 | 54.2%    | 10   | 37.6%    | 10   | 39.3%    |        |          |                                                                        |       |        |       |        |       |        |        |        |
| SGO_0673 | 12 | 29.2%    | 5    | 17.4%    | 4    | 15.1%    | 3      | 10.1%    | DivIB; cell division protein DivIB                                     |       |        |       |        |       |        |        |        |
|          | 18 | 32.2%    | 5    | 16.4%    |      |          |        |          |                                                                        |       |        |       |        |       |        |        |        |
| SGO_0674 | 19 | 52.4%    | 19   | 53.0%    | 18   | 54.3%    | 15     | 47.9%    | ftsA; cell division protein FtsA                                       |       |        |       |        |       |        |        |        |
|          | 23 | 59.2%    | 17   | 52.1%    | 19   | 55.4%    | 15     | 46.6%    |                                                                        |       |        |       |        |       |        |        |        |
| SGO_0675 | 17 | 49.2%    | 20   | 52.3%    | 17   | 48.9%    | 15     | 43.9%    | ftsZ; cell division protein FtsZ                                       |       |        |       |        |       |        |        |        |
|          | 19 | 49.4%    | 18   | 50.6%    | 17   | 50.8%    | 15     | 46.1%    |                                                                        |       |        |       |        |       |        |        |        |
| SGO_0676 | 5  | 32.7%    | 5    | 27.4%    | 4    | 24.7%    | 4      | 31.4%    | conserved hypothetical protein TIGR00044                               |       |        |       |        |       |        |        |        |
|          | 7  | 39.0%    | 5    | 32.3%    | 6    | 38.1%    | 3      | 17.9%    |                                                                        |       |        |       |        |       |        |        |        |
| SGO_0677 | 8  | 50.3%    | 7    | 55.6%    | 4    | 37.0%    | 3      | 31.7%    | ylmF protein                                                           |       |        |       |        |       |        |        |        |
|          | 9  | 63.5%    | 6    | 53.4%    | 7    | 56.6%    | 3      | 31.7%    |                                                                        |       |        |       |        |       |        |        |        |
| SGO_0680 | 13 | 57.3%    | 12   | 56.5%    | 15   | 57.3%    | 13     | 52.4%    | cell division protein DivIVA                                           |       |        |       |        |       |        |        |        |
|          | 13 | 57.3%    | 9    | 43.9%    | 15   | 57.3%    | 12     | 54.5%    |                                                                        |       |        |       |        |       |        |        |        |
| SGO_0681 | 23 | 32.5%    | 22   | 33.9%    | 30   | 40.6%    | 21     | 33.2%    | ileS; isoleucyl-tRNA synthetase                                        |       |        |       |        |       |        |        |        |
|          | 28 | 36.1%    | 21   | 39.6%    | 29   | 41.0%    | 19     | 30.8%    |                                                                        |       |        |       |        |       |        |        |        |
| SGO_0684 | 4  | 41.4%    | 5    | 41.4%    | 5    | 41.4%    | 4      | 41.4%    | hypothetical protein SGO_0684                                          |       |        |       |        |       |        |        |        |
|          | 5  | 42.4%    | 6    | 42.4%    | 4    | 41.4%    | 4      | 41.4%    |                                                                        |       |        |       |        |       |        |        |        |

 Show detected proteins only Show all proteins

Proteins found:

1179

 Filter by category:

ABC Transporter

Dot Plots Dot Plots

Summary Table

SgFn vs Sg

SgPg vs Sg

SgPgFn vs Sg

SgPg vs SgFn

SgPgFn vs SgFn

SgPgFn vs SgPg

Coverage

Sg

SgFn

SgPg

SgPgFn

Description

Sg

SgFn

SgPg

SgPgFn

Protein

n Coverage

n Coverage

n Coverage

n Coverage

Rep I Rep II

Rep I Rep II

Rep I Rep II

Rep I Rep II

| Protein  | Sg |          | SgFn |          | SgPg |          | SgPgFn |          | Description                                           | Sg    |        | SgFn  |        | SgPg  |        | SgPgFn |        |
|----------|----|----------|------|----------|------|----------|--------|----------|-------------------------------------------------------|-------|--------|-------|--------|-------|--------|--------|--------|
|          | n  | Coverage | n    | Coverage | n    | Coverage | n      | Coverage |                                                       | Rep I | Rep II | Rep I | Rep II | Rep I | Rep II | Rep I  | Rep II |
| SGO_0685 | 3  | 32.7%    | 3    | 34.0%    |      |          |        |          | MutT/nudix family protein                             |       |        |       |        |       |        |        |        |
| SGO_0688 | 27 | 48.1%    | 15   | 24.7%    | 24   | 41.7%    | 14     | 27.6%    | ATP dependent Clp protease, ATP-binding subunit, ClpE |       |        |       |        |       |        |        |        |
|          | 35 | 50.2%    | 16   | 31.6%    | 26   | 48.2%    | 13     | 23.4%    |                                                       |       |        |       |        |       |        |        |        |
| SGO_0689 | 4  | 31.6%    |      |          |      |          |        |          | hypothetical protein SGO_0689                         |       |        |       |        |       |        |        |        |
| SGO_0690 | 3  | 17.3%    | 3    | 17.3%    |      |          |        |          | folD; methenyltetrahydrofolate cyclohydrolase         |       |        |       |        |       |        |        |        |
|          | 4  | 20.8%    | 5    | 25.0%    | 3    | 17.3%    |        |          |                                                       |       |        |       |        |       |        |        |        |
| SGO_0693 | 12 | 33.6%    | 8    | 24.7%    | 3    | 10.8%    |        |          | xseA; exodeoxyribonuclease VII, large subunit         |       |        |       |        |       |        |        |        |
|          | 14 | 33.2%    | 15   | 39.2%    | 3    | 10.8%    | 3      | 8.5%     |                                                       |       |        |       |        |       |        |        |        |
| SGO_0694 |    |          |      |          | 3    | 45.7%    |        |          | xseB; exodeoxyribonuclease VII, small subunit         |       |        |       |        |       |        |        |        |
|          | 3  | 61.4%    |      |          |      |          |        |          |                                                       |       |        |       |        |       |        |        |        |
| SGO_0695 |    |          | 3    | 9.6%     |      |          |        |          | geranyltranstransferase                               |       |        |       |        |       |        |        |        |
|          |    |          |      |          | 3    | 16.5%    |        |          |                                                       |       |        |       |        |       |        |        |        |
| SGO_0696 | 3  | 10.3%    |      |          |      |          |        |          | hemolysin-like protein                                |       |        |       |        |       |        |        |        |
|          | 4  | 18.1%    |      |          |      |          |        |          |                                                       |       |        |       |        |       |        |        |        |
| SGO_0697 | 3  | 34.3%    |      |          | 3    | 32.9%    |        |          | transcription regulator                               |       |        |       |        |       |        |        |        |
|          | 4  | 34.3%    |      |          |      |          |        |          |                                                       |       |        |       |        |       |        |        |        |
| SGO_0698 | 8  | 24.6%    | 10   | 27.0%    | 6    | 17.8%    |        |          | recN; DNA repair protein RecN                         |       |        |       |        |       |        |        |        |
|          | 14 | 38.2%    | 7    | 18.3%    | 12   | 33.3%    |        |          |                                                       |       |        |       |        |       |        |        |        |
| SGO_0699 | 3  | 26.4%    | 5    | 41.7%    | 3    | 31.4%    |        |          | Serine/threonine protein phosphatase                  |       |        |       |        |       |        |        |        |
|          | 3  | 25.2%    | 6    | 35.1%    | 4    | 35.1%    |        |          |                                                       |       |        |       |        |       |        |        |        |
| SGO_0700 | 7  | 39.4%    | 6    | 31.4%    | 8    | 42.2%    | 3      | 11.6%    | DegV family protein                                   |       |        |       |        |       |        |        |        |
|          | 7  | 33.6%    | 4    | 16.2%    | 9    | 45.1%    | 4      | 18.1%    |                                                       |       |        |       |        |       |        |        |        |

 Show detected proteins only Show all proteins Filter by category:

ABC Transporter

Proteins found:

1179

Dot Plots Dot Plots

Summary Table

SgFn vs Sg

SgPg vs Sg

SgPgFn vs Sg

SgPg vs SgFn

SgPgFn vs SgFn

SgPgFn vs SgPg

Coverage

Sg

SgFn

SgPg

SgPgFn

Description

Sg

SgFn

SgPg

SgPgFn

Protein

n Coverage

n Coverage

n Coverage

n Coverage

Rep I Rep II

Rep I Rep II

Rep I Rep II

Rep I Rep II

SGO\_0701

7

59.3%

8

73.6%

6

49.5%

7

62.6%

hup; DNA-binding histone-like protein HU

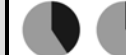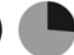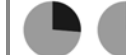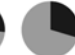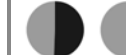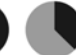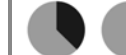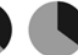

SGO\_0704

15

70.9%

17

79.1%

21

80.4%

18

81.3%

gpmA; 2,3-bisphosphoglycerate-dependent phosphoglycerate mutase

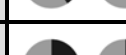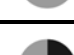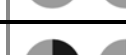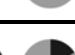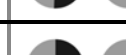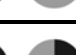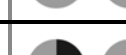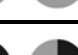

SGO\_0705

3

45.5%

Protein of unknown function (DUF1250) superfamily

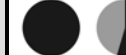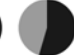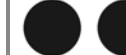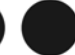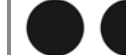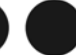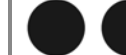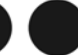

SGO\_0706

3

12.0%

11

47.3%

7

32.8%

phoH-like protein

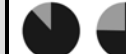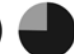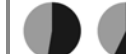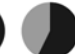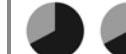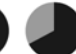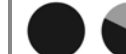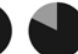

SGO\_0707

36

28.7%

32

25.8%

10

11.6%

6

4.9%

LPXTG cell wall surface protein

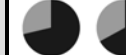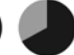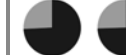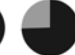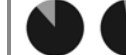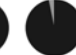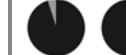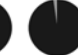

SGO\_0708

18

65.1%

23

92.7%

19

77.6%

16

71.9%

ald; alanine dehydrogenase

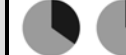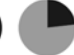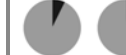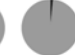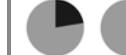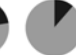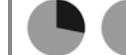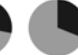

SGO\_0711

3

12.7%

4

20.6%

conserved hypothetical protein TIGR00043

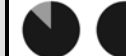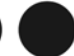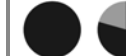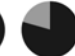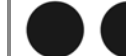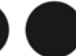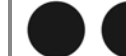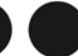

SGO\_0713

14

51.8%

15

61.9%

14

54.8%

7

29.1%

sgg; GTP-binding protein Era

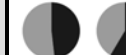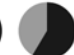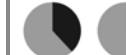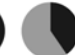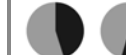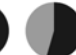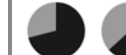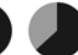

SGO\_0715

3

18.2%

3

19.0%

mutM; formamidopyrimidine-DNA glycosylase

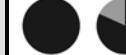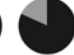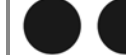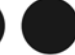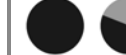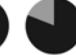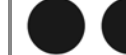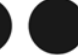

SGO\_0719

14

22.9%

6

11.3%

4

8.6%

rnr; ribonuclease R

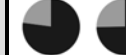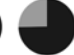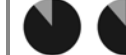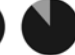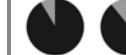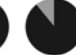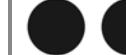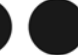

SGO\_0721

7

13.7%

4

8.0%

4

7.5%

6

11.1%

abpB-like dipeptidase lipoprotein

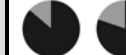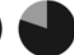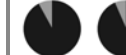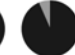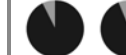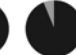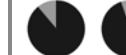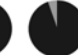

SGO\_0722

4

19.2%

5

22.0%

5

19.6%

tehB; tellurite resistance protein TehB

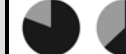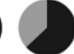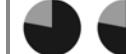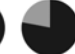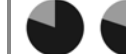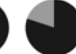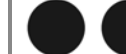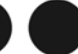 Show detected proteins only Show all proteins Filter by category:

ABC Transporter

Proteins found:

1179

Dot Plots Dot Plots

Summary Table

SgFn vs Sg

SgPg vs Sg

SgPgFn vs Sg

SgPg vs SgFn

SgPgFn vs SgFn

SgPgFn vs SgPg

Coverage

| Protein  | Sg |          | SgFn |          | SgPg |          | SgPgFn |          | Description                                           | Sg    |        | SgFn  |        | SgPg  |        | SgPgFn |        |
|----------|----|----------|------|----------|------|----------|--------|----------|-------------------------------------------------------|-------|--------|-------|--------|-------|--------|--------|--------|
|          | n  | Coverage | n    | Coverage | n    | Coverage | n      | Coverage |                                                       | Rep I | Rep II | Rep I | Rep II | Rep I | Rep II | Rep I  | Rep II |
| SGO_0724 | 12 | 32.5%    | 6    | 20.5%    | 5    | 16.1%    |        |          | dipeptidase                                           |       |        |       |        |       |        |        |        |
|          | 14 | 36.0%    | 5    | 14.4%    | 6    | 18.1%    |        |          |                                                       |       |        |       |        |       |        |        |        |
| SGO_0728 | 4  | 27.0%    |      |          |      |          |        |          | ABC transporter, ATP-binding protein SP1653           |       |        |       |        |       |        |        |        |
|          | 4  | 5.2%     |      |          |      |          |        |          | ABC transporter permease protein                      |       |        |       |        |       |        |        |        |
| SGO_0729 | 7  | 9.7%     |      |          |      |          |        |          | RRF2 family protein                                   |       |        |       |        |       |        |        |        |
|          | 4  | 41.6%    |      |          |      |          |        |          |                                                       |       |        |       |        |       |        |        |        |
| SGO_0731 | 4  | 41.6%    |      |          |      |          |        |          | hprK; HPr(Ser) kinase/phosphatase                     |       |        |       |        |       |        |        |        |
|          | 9  | 43.1%    | 10   | 46.3%    | 5    | 22.8%    | 3      | 11.9%    |                                                       |       |        |       |        |       |        |        |        |
| SGO_0736 | 8  | 37.9%    | 9    | 42.8%    | 5    | 21.5%    |        |          | lgt; prolipoprotein diacylglyceryl transferase        |       |        |       |        |       |        |        |        |
|          | 3  | 14.5%    |      |          |      |          |        |          | Bacterial protein of unknown function (DUF948) family |       |        |       |        |       |        |        |        |
| SGO_0737 | 5  | 57.5%    |      |          | 4    | 51.2%    |        |          | hypothetical protein SGO_0739                         |       |        |       |        |       |        |        |        |
|          | 5  | 57.5%    |      |          | 3    | 28.3%    |        |          |                                                       |       |        |       |        |       |        |        |        |
| SGO_0738 | 7  | 43.5%    |      |          | 8    | 63.9%    | 4      | 43.5%    | peptidase, U32 family                                 |       |        |       |        |       |        |        |        |
|          | 7  | 46.9%    | 4    | 28.6%    | 7    | 63.9%    | 6      | 55.8%    |                                                       |       |        |       |        |       |        |        |        |
| SGO_0739 | 4  | 17.2%    | 7    | 29.8%    | 4    | 18.8%    | 4      | 16.8%    | peptidase, U32 family                                 |       |        |       |        |       |        |        |        |
|          | 5  | 20.7%    | 6    | 29.4%    | 5    | 25.9%    |        |          |                                                       |       |        |       |        |       |        |        |        |
| SGO_0742 | 13 | 38.1%    | 9    | 27.3%    | 10   | 30.1%    | 7      | 21.5%    | hypothetical protein SGO_0745                         |       |        |       |        |       |        |        |        |
|          | 16 | 48.8%    | 6    | 17.8%    | 10   | 28.7%    | 7      | 24.5%    |                                                       |       |        |       |        |       |        |        |        |
| SGO_0743 | 3  | 44.3%    |      |          | 4    | 44.3%    | 4      | 44.3%    | glutathione reductase                                 |       |        |       |        |       |        |        |        |
|          | 3  | 44.3%    | 3    | 38.6%    | 4    | 44.3%    | 4      | 44.3%    |                                                       |       |        |       |        |       |        |        |        |
| SGO_0745 | 5  | 19.2%    | 12   | 48.6%    | 11   | 45.9%    | 7      | 20.3%    |                                                       |       |        |       |        |       |        |        |        |
|          | 9  | 29.0%    | 12   | 45.4%    | 9    | 38.8%    | 6      | 21.4%    |                                                       |       |        |       |        |       |        |        |        |

- Show detected proteins only
- Show all proteins

Proteins found:  
1179

Filter by category:

ABC Transporter

Dot Plots Dot Plots

Summary Table

SgFn vs Sg

SgPg vs Sg

SgPgFn vs Sg

SgPg vs SgFn

SgPgFn vs SgFn

SgPgFn vs SgPg

Coverage

| Protein  | Sg |          | SgFn |          | SgPg |          | SgPgFn |          | Description                                               | Sg    |        | SgFn  |        | SgPg  |        | SgPgFn |        |
|----------|----|----------|------|----------|------|----------|--------|----------|-----------------------------------------------------------|-------|--------|-------|--------|-------|--------|--------|--------|
|          | n  | Coverage | n    | Coverage | n    | Coverage | n      | Coverage |                                                           | Rep I | Rep II | Rep I | Rep II | Rep I | Rep II | Rep I  | Rep II |
| SGO_0750 | 21 | 64.0%    | 5    | 16.8%    | 16   | 53.8%    | 12     | 49.0%    | efflux transporter, RND family, MFP subunit subfamily     |       |        |       |        |       |        |        |        |
|          | 20 | 61.9%    | 4    | 18.8%    | 18   | 60.9%    | 12     | 41.4%    |                                                           |       |        |       |        |       |        |        |        |
| SGO_0751 | 9  | 45.0%    | 3    | 20.8%    | 13   | 74.5%    | 7      | 44.6%    | ABC transporter, ATP-binding protein SP0786               |       |        |       |        |       |        |        |        |
|          | 11 | 56.3%    | 5    | 34.2%    | 11   | 68.4%    | 7      | 40.3%    |                                                           |       |        |       |        |       |        |        |        |
| SGO_0752 | 10 | 28.5%    |      |          | 5    | 17.5%    |        |          | ABC transporter, ATP-binding protein                      |       |        |       |        |       |        |        |        |
|          | 14 | 36.6%    |      |          | 6    | 16.7%    | 5      | 13.0%    |                                                           |       |        |       |        |       |        |        |        |
| SGO_0753 | 22 | 45.8%    | 20   | 38.1%    | 24   | 48.0%    | 16     | 32.5%    | lysS; lysyl-tRNA synthetase                               |       |        |       |        |       |        |        |        |
|          | 26 | 45.4%    | 19   | 40.3%    | 22   | 45.8%    | 16     | 33.3%    |                                                           |       |        |       |        |       |        |        |        |
| SGO_0754 |    |          |      |          |      |          |        |          | phosphoglycerate mutase family protein                    |       |        |       |        |       |        |        |        |
|          |    |          | 4    | 42.3%    | 3    | 27.7%    |        |          |                                                           |       |        |       |        |       |        |        |        |
| SGO_0755 | 6  | 57.0%    | 4    | 39.2%    | 4    | 43.7%    |        |          | regulatory protein                                        |       |        |       |        |       |        |        |        |
|          | 6  | 55.1%    | 5    | 44.9%    | 6    | 55.1%    | 4      | 41.8%    |                                                           |       |        |       |        |       |        |        |        |
| SGO_0757 | 10 | 49.2%    |      |          |      |          |        |          | peptidase, U32 family                                     |       |        |       |        |       |        |        |        |
|          | 9  | 52.4%    |      |          |      |          |        |          |                                                           |       |        |       |        |       |        |        |        |
| SGO_0760 | 37 | 44.2%    | 34   | 42.7%    | 40   | 50.7%    | 18     | 24.1%    | ppc; phosphoenolpyruvate carboxylase                      |       |        |       |        |       |        |        |        |
|          | 41 | 44.4%    | 29   | 40.4%    | 38   | 45.9%    | 18     | 23.8%    |                                                           |       |        |       |        |       |        |        |        |
| SGO_0761 | 31 | 78.1%    | 42   | 82.2%    | 37   | 79.9%    | 36     | 79.4%    | tuf; translation elongation factor Tu                     |       |        |       |        |       |        |        |        |
|          | 32 | 78.1%    | 52   | 98.0%    | 36   | 79.9%    | 36     | 81.2%    |                                                           |       |        |       |        |       |        |        |        |
| SGO_0762 | 12 | 54.0%    | 13   | 55.2%    | 14   | 55.2%    | 12     | 54.0%    | tpiA; triosephosphate isomerase                           |       |        |       |        |       |        |        |        |
|          | 12 | 54.0%    | 13   | 54.0%    | 13   | 55.2%    | 12     | 54.0%    |                                                           |       |        |       |        |       |        |        |        |
| SGO_0763 | 19 | 59.9%    | 11   | 41.1%    | 14   | 45.5%    | 9      | 26.3%    | murA-1; UDP-N-acetylglucosamine 1-carboxyvinyltransferase |       |        |       |        |       |        |        |        |
|          | 17 | 58.2%    | 12   | 40.4%    | 15   | 54.2%    | 8      | 24.4%    |                                                           |       |        |       |        |       |        |        |        |
| SGO_0765 | 4  | 21.9%    |      |          |      |          |        |          | endA; DNA-entry nuclease                                  |       |        |       |        |       |        |        |        |
|          | 8  | 49.1%    |      |          |      |          |        |          |                                                           |       |        |       |        |       |        |        |        |

- Show detected proteins only  
 Show all proteins

Proteins found:  
1179

Filter by category:

ABC Transporter

Dot Plots Dot Plots



Summary Table

SgFn vs Sg

SgPg vs Sg

SgPgFn vs Sg

SgPg vs SgFn

SgPgFn vs SgFn

SgPgFn vs SgPg

Coverage

Sg

SgFn

SgPg

SgPgFn

Description

Sg

SgFn

SgPg

SgPgFn

Protein

n Coverage

n Coverage

n Coverage

n Coverage

Rep I Rep II

Rep I Rep II

Rep I Rep II

Rep I Rep II

SGO\_0767

9

40.5%

11

50.5%

6

33.2%

transport protein

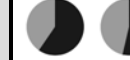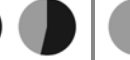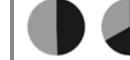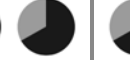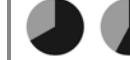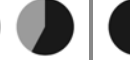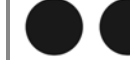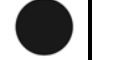

SGO\_0771

12

45.0%

16

64.7%

12

58.9%

12

48.1%

pepqr; proline dipeptidase

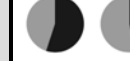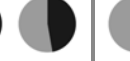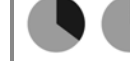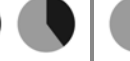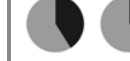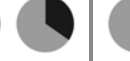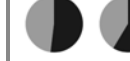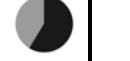

SGO\_0773

25

82.3%

14

65.3%

18

74.6%

13

60.5%

ccpA; catabolite control protein A

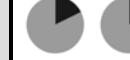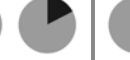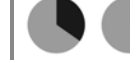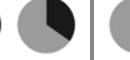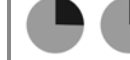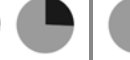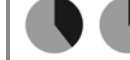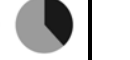

SGO\_0774

12

38.0%

5

15.9%

5

20.6%

4

17.1%

glycosyl transferase, group 1 family protein

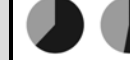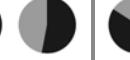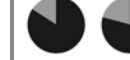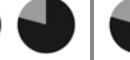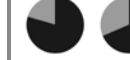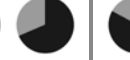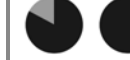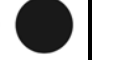

SGO\_0775

13

32.3%

11

30.9%

9

23.8%

4

12.4%

glycosyl transferase, group 1

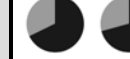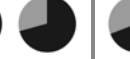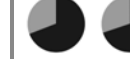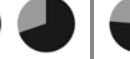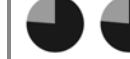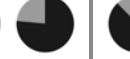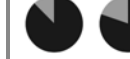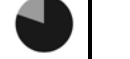

SGO\_0778

23

46.7%

24

56.0%

25

53.8%

18

33.2%

thrS; threonyl-tRNA synthetase

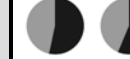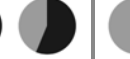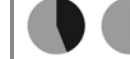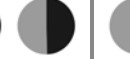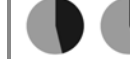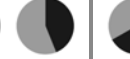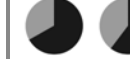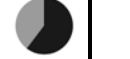

SGO\_0779

7

45.5%

16

70.0%

13

65.2%

5

30.0%

response regulator

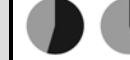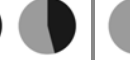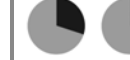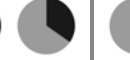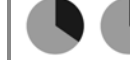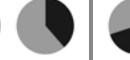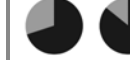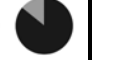

SGO\_0780

14

37.7%

7

19.4%

3

5.3%

histidine kinase

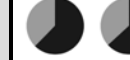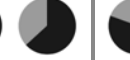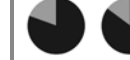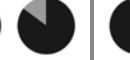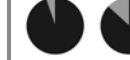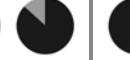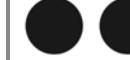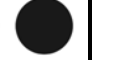

SGO\_0781

11

43.8%

vicX; Zn-dependent hydrolase (beta-lactamase superfamily)

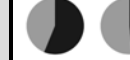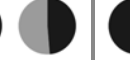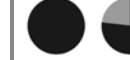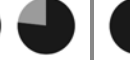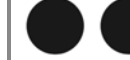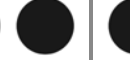

SGO\_0782

3

16.9%

Protein of unknown function (DUF454) family

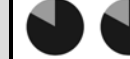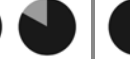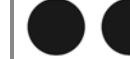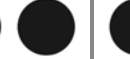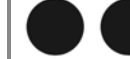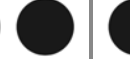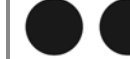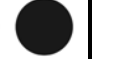

SGO\_0784

53

48.3%

18

21.9%

24

24.9%

9

10.0%

smc; chromosome segregation protein SMC

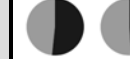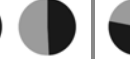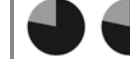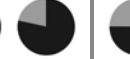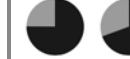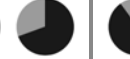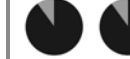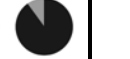

SGO\_0785

4

20.4%

3

15.8%

3

20.0%

Cof family protein

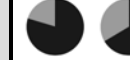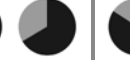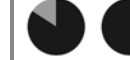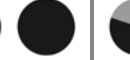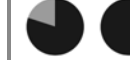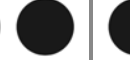 Show detected proteins only Show all proteins Filter by category:

ABC Transporter

Proteins found:

1179

Dot Plots Dot Plots

Summary Table

SgFn vs Sg

SgPg vs Sg

SgPgFn vs Sg

SgPg vs SgFn

SgPgFn vs SgFn

SgPgFn vs SgPg

Coverage

| Protein  | Sg |          | SgFn |          | SgPg |          | SgPgFn |          | Description                                 | Sg    |        | SgFn  |        | SgPg  |        | SgPgFn |        |
|----------|----|----------|------|----------|------|----------|--------|----------|---------------------------------------------|-------|--------|-------|--------|-------|--------|--------|--------|
|          | n  | Coverage | n    | Coverage | n    | Coverage | n      | Coverage |                                             | Rep I | Rep II | Rep I | Rep II | Rep I | Rep II | Rep I  | Rep II |
| SGO_0786 | 6  | 39.4%    |      |          | 6    | 39.4%    | 5      | 33.8%    | Cof family protein                          |       |        |       |        |       |        |        |        |
|          | 5  | 33.8%    | 4    | 25.7%    | 7    | 46.1%    | 5      | 33.8%    |                                             |       |        |       |        |       |        |        |        |
| SGO_0787 | 20 | 47.1%    | 14   | 38.9%    | 12   | 31.4%    | 6      | 15.3%    | ftsY; cell division protein FtsY            |       |        |       |        |       |        |        |        |
|          | 24 | 54.6%    | 9    | 23.8%    | 14   | 33.5%    | 7      | 17.4%    |                                             |       |        |       |        |       |        |        |        |
| SGO_0788 | 7  | 18.5%    | 19   | 47.5%    | 15   | 40.7%    | 7      | 19.8%    | zwf; glucose-6-phosphate 1-dehydrogenase    |       |        |       |        |       |        |        |        |
|          | 12 | 30.5%    | 18   | 47.5%    | 13   | 38.5%    | 9      | 20.6%    |                                             |       |        |       |        |       |        |        |        |
| SGO_0792 | 21 | 34.6%    | 7    | 13.5%    | 21   | 35.4%    | 11     | 18.5%    | hypothetical protein SGO_0792               |       |        |       |        |       |        |        |        |
|          | 20 | 34.9%    | 6    | 12.7%    | 15   | 23.5%    | 9      | 18.0%    |                                             |       |        |       |        |       |        |        |        |
| SGO_0794 | 16 | 38.9%    | 19   | 43.4%    | 20   | 35.6%    | 9      | 20.4%    | metallo-beta-lactamase family protein       |       |        |       |        |       |        |        |        |
|          | 19 | 41.6%    | 15   | 39.2%    | 19   | 39.4%    | 10     | 25.9%    |                                             |       |        |       |        |       |        |        |        |
| SGO_0795 | 4  | 24.0%    | 6    | 31.2%    | 5    | 32.3%    | 4      | 26.6%    | tributylin esterase                         |       |        |       |        |       |        |        |        |
|          | 5  | 31.2%    | 9    | 44.9%    | 6    | 41.8%    | 3      | 21.7%    |                                             |       |        |       |        |       |        |        |        |
| SGO_0797 |    |          | 4    | 12.3%    |      |          |        |          | RocB protein, putative                      |       |        |       |        |       |        |        |        |
|          | 6  | 12.8%    |      |          |      |          |        |          |                                             |       |        |       |        |       |        |        |        |
| SGO_0798 | 11 | 64.8%    | 8    | 49.0%    | 11   | 63.2%    | 5      | 29.6%    | ABC transporter, ATP-binding protein SP1381 |       |        |       |        |       |        |        |        |
|          | 10 | 55.1%    | 8    | 48.2%    | 11   | 60.3%    | 6      | 35.2%    |                                             |       |        |       |        |       |        |        |        |
| SGO_0800 | 11 | 48.2%    | 4    | 23.0%    | 6    | 29.7%    | 3      | 15.7%    | polysaccharide deacetylase family protein   |       |        |       |        |       |        |        |        |
|          | 11 | 48.2%    | 4    | 16.3%    | 5    | 23.3%    |        |          |                                             |       |        |       |        |       |        |        |        |
| SGO_0801 | 15 | 48.4%    | 16   | 54.9%    | 18   | 60.0%    | 16     | 50.5%    | hom; homoserine dehydrogenase               |       |        |       |        |       |        |        |        |
|          | 16 | 53.5%    | 17   | 55.4%    | 17   | 54.2%    | 12     | 42.5%    |                                             |       |        |       |        |       |        |        |        |
| SGO_0802 | 10 | 54.9%    | 8    | 43.1%    | 10   | 55.6%    | 5      | 28.1%    | thrB; homoserine kinase                     |       |        |       |        |       |        |        |        |
|          | 12 | 60.1%    | 13   | 63.5%    | 10   | 60.1%    | 8      | 41.0%    |                                             |       |        |       |        |       |        |        |        |
| SGO_0803 | 7  | 20.8%    |      |          | 7    | 21.8%    | 3      | 15.3%    | hypothetical protein SGO_0803               |       |        |       |        |       |        |        |        |
|          | 8  | 23.8%    |      |          | 8    | 23.8%    | 4      | 15.3%    |                                             |       |        |       |        |       |        |        |        |

Description

| Protein  | Sg |          | SgFn |          | SgPg |          | SgPgFn |          | Description                                 | Sg    |        | SgFn  |        | SgPg  |        | SgPgFn |        |
|----------|----|----------|------|----------|------|----------|--------|----------|---------------------------------------------|-------|--------|-------|--------|-------|--------|--------|--------|
|          | n  | Coverage | n    | Coverage | n    | Coverage | n      | Coverage |                                             | Rep I | Rep II | Rep I | Rep II | Rep I | Rep II | Rep I  | Rep II |
| SGO_0786 | 6  | 39.4%    |      |          | 6    | 39.4%    | 5      | 33.8%    | Cof family protein                          |       |        |       |        |       |        |        |        |
|          | 5  | 33.8%    | 4    | 25.7%    | 7    | 46.1%    | 5      | 33.8%    |                                             |       |        |       |        |       |        |        |        |
| SGO_0787 | 20 | 47.1%    | 14   | 38.9%    | 12   | 31.4%    | 6      | 15.3%    | ftsY; cell division protein FtsY            |       |        |       |        |       |        |        |        |
|          | 24 | 54.6%    | 9    | 23.8%    | 14   | 33.5%    | 7      | 17.4%    |                                             |       |        |       |        |       |        |        |        |
| SGO_0788 | 7  | 18.5%    | 19   | 47.5%    | 15   | 40.7%    | 7      | 19.8%    | zwf; glucose-6-phosphate 1-dehydrogenase    |       |        |       |        |       |        |        |        |
|          | 12 | 30.5%    | 18   | 47.5%    | 13   | 38.5%    | 9      | 20.6%    |                                             |       |        |       |        |       |        |        |        |
| SGO_0792 | 21 | 34.6%    | 7    | 13.5%    | 21   | 35.4%    | 11     | 18.5%    | hypothetical protein SGO_0792               |       |        |       |        |       |        |        |        |
|          | 20 | 34.9%    | 6    | 12.7%    | 15   | 23.5%    | 9      | 18.0%    |                                             |       |        |       |        |       |        |        |        |
| SGO_0794 | 16 | 38.9%    | 19   | 43.4%    | 20   | 35.6%    | 9      | 20.4%    | metallo-beta-lactamase family protein       |       |        |       |        |       |        |        |        |
|          | 19 | 41.6%    | 15   | 39.2%    | 19   | 39.4%    | 10     | 25.9%    |                                             |       |        |       |        |       |        |        |        |
| SGO_0795 | 4  | 24.0%    | 6    | 31.2%    | 5    | 32.3%    | 4      | 26.6%    | tributylin esterase                         |       |        |       |        |       |        |        |        |
|          | 5  | 31.2%    | 9    | 44.9%    | 6    | 41.8%    | 3      | 21.7%    |                                             |       |        |       |        |       |        |        |        |
| SGO_0797 |    |          | 4    | 12.3%    |      |          |        |          | RocB protein, putative                      |       |        |       |        |       |        |        |        |
|          | 6  | 12.8%    |      |          |      |          |        |          |                                             |       |        |       |        |       |        |        |        |
| SGO_0798 | 11 | 64.8%    | 8    | 49.0%    | 11   | 63.2%    | 5      | 29.6%    | ABC transporter, ATP-binding protein SP1381 |       |        |       |        |       |        |        |        |
|          | 10 | 55.1%    | 8    | 48.2%    | 11   | 60.3%    | 6      | 35.2%    |                                             |       |        |       |        |       |        |        |        |
| SGO_0800 | 11 | 48.2%    | 4    | 23.0%    | 6    | 29.7%    | 3      | 15.7%    | polysaccharide deacetylase family protein   |       |        |       |        |       |        |        |        |
|          | 11 | 48.2%    | 4    | 16.3%    | 5    | 23.3%    |        |          |                                             |       |        |       |        |       |        |        |        |
| SGO_0801 | 15 | 48.4%    | 16   | 54.9%    | 18   | 60.0%    | 16     | 50.5%    | hom; homoserine dehydrogenase               |       |        |       |        |       |        |        |        |
|          | 16 | 53.5%    | 17   | 55.4%    | 17   | 54.2%    | 12     | 42.5%    |                                             |       |        |       |        |       |        |        |        |
| SGO_0802 | 10 | 54.9%    | 8    | 43.1%    | 10   | 55.6%    | 5      | 28.1%    | thrB; homoserine kinase                     |       |        |       |        |       |        |        |        |
|          | 12 | 60.1%    | 13   | 63.5%    | 10   | 60.1%    | 8      | 41.0%    |                                             |       |        |       |        |       |        |        |        |
| SGO_0803 | 7  | 20.8%    |      |          | 7    | 21.8%    | 3      | 15.3%    | hypothetical protein SGO_0803               |       |        |       |        |       |        |        |        |
|          | 8  | 23.8%    |      |          | 8    | 23.8%    | 4      | 15.3%    |                                             |       |        |       |        |       |        |        |        |

- Show detected proteins only  
 Show all proteins

Proteins found:  
1179

Filter by category:

ABC Transporter

Dot Plots Dot Plots

Summary Table

SgFn vs Sg

SgPg vs Sg

SgPgFn vs Sg

SgPg vs SgFn

SgPgFn vs SgFn

SgPgFn vs SgPg

Coverage

Sg

SgFn

SgPg

SgPgFn

Description

Sg

SgFn

SgPg

SgPgFn

Protein

n Coverage

n Coverage

n Coverage

n Coverage

Rep I Rep II

Rep I Rep II

Rep I Rep II

Rep I Rep II

| Protein  | Sg |          | SgFn |          | SgPg |          | SgPgFn |          | Description                                                      | Sg    |        | SgFn  |        | SgPg  |        | SgPgFn |        |
|----------|----|----------|------|----------|------|----------|--------|----------|------------------------------------------------------------------|-------|--------|-------|--------|-------|--------|--------|--------|
|          | n  | Coverage | n    | Coverage | n    | Coverage | n      | Coverage |                                                                  | Rep I | Rep II | Rep I | Rep II | Rep I | Rep II | Rep I  | Rep II |
| SGO_0804 | 5  | 17.2%    | 4    | 20.5%    | 4    | 11.9%    |        |          | murB; UDP-N-acetylenolpyruvoylglucosamine reductase              |       |        |       |        |       |        |        |        |
|          | 6  | 25.2%    | 4    | 20.5%    | 4    | 22.2%    |        |          |                                                                  |       |        |       |        |       |        |        |        |
| SGO_0805 | 12 | 30.9%    | 4    | 21.0%    | 3    | 13.8%    |        |          | potA; spermidine/putrescine ABC transporter, ATP-binding subunit |       |        |       |        |       |        |        |        |
|          | 12 | 28.1%    | 4    | 21.8%    | 5    | 11.7%    |        |          |                                                                  |       |        |       |        |       |        |        |        |
| SGO_0806 | 4  | 15.7%    |      |          |      |          |        |          | potB; spermidine/putrescine ABC transporter, permease protein    |       |        |       |        |       |        |        |        |
|          | 4  | 15.7%    |      |          |      |          |        |          |                                                                  |       |        |       |        |       |        |        |        |
| SGO_0808 | 13 | 57.0%    | 3    | 12.4%    |      |          |        |          | potD; spermidine/putrescine ABC transporter                      |       |        |       |        |       |        |        |        |
|          | 16 | 57.3%    |      |          | 6    | 29.2%    |        |          |                                                                  |       |        |       |        |       |        |        |        |
| SGO_0812 | 7  | 35.6%    | 5    | 31.5%    | 5    | 25.6%    |        |          | hypothetical protein SGO_0812                                    |       |        |       |        |       |        |        |        |
|          | 8  | 39.6%    | 7    | 38.9%    | 5    | 30.0%    |        |          |                                                                  |       |        |       |        |       |        |        |        |
| SGO_0813 |    |          | 3    | 3.8%     |      |          |        |          | fructose-bisphosphatase                                          |       |        |       |        |       |        |        |        |
|          | 3  | 4.4%     | 3    | 7.7%     |      |          |        |          |                                                                  |       |        |       |        |       |        |        |        |
| SGO_0814 |    |          |      |          |      |          | 3      | 7.4%     | aminotransferase, class-V                                        |       |        |       |        |       |        |        |        |
|          | 5  | 27.4%    |      |          | 3    | 13.9%    |        |          |                                                                  |       |        |       |        |       |        |        |        |
| SGO_0815 | 15 | 51.2%    | 8    | 31.4%    | 14   | 47.3%    | 6      | 22.0%    | thiI; thiamine biosynthesis protein ThiI                         |       |        |       |        |       |        |        |        |
|          | 18 | 59.2%    | 9    | 33.4%    | 13   | 41.6%    | 7      | 26.5%    |                                                                  |       |        |       |        |       |        |        |        |
| SGO_0817 | 5  | 22.3%    |      |          |      |          |        |          | hypothetical protein SGO_0817                                    |       |        |       |        |       |        |        |        |
|          | 3  | 18.8%    |      |          |      |          |        |          |                                                                  |       |        |       |        |       |        |        |        |
| SGO_0818 | 3  | 49.0%    | 3    | 49.0%    | 4    | 57.7%    | 3      | 49.0%    | rplU; ribosomal protein L21                                      |       |        |       |        |       |        |        |        |
|          | 4  | 54.8%    |      |          | 3    | 49.0%    | 3      | 49.0%    |                                                                  |       |        |       |        |       |        |        |        |
| SGO_0820 | 3  | 37.1%    |      |          | 5    | 49.5%    | 3      | 37.1%    | rpmA; ribosomal protein L27                                      |       |        |       |        |       |        |        |        |
|          | 3  | 37.1%    | 3    | 37.1%    | 5    | 49.5%    | 3      | 37.1%    |                                                                  |       |        |       |        |       |        |        |        |
| SGO_0822 | 3  | 30.3%    |      |          |      |          |        |          | lipoprotein, putative                                            |       |        |       |        |       |        |        |        |
|          | 5  | 36.0%    |      |          |      |          |        |          |                                                                  |       |        |       |        |       |        |        |        |

 Show detected proteins only Show all proteins Filter by category:

ABC Transporter

Proteins found:

1179

Dot Plots Dot Plots

Summary Table

SgFn vs Sg

SgPg vs Sg

SgPgFn vs Sg

SgPg vs SgFn

SgPgFn vs SgFn

SgPgFn vs SgPg

Coverage

| Protein  | Sg |          | SgFn |          | SgPg |          | SgPgFn |          | Description                       | Sg    |        | SgFn  |        | SgPg  |        | SgPgFn |        |
|----------|----|----------|------|----------|------|----------|--------|----------|-----------------------------------|-------|--------|-------|--------|-------|--------|--------|--------|
|          | n  | Coverage | n    | Coverage | n    | Coverage | n      | Coverage |                                   | Rep I | Rep II | Rep I | Rep II | Rep I | Rep II | Rep I  | Rep II |
| SGO_0823 | 4  | 23.7%    | 3    | 13.7%    | 4    | 25.9%    |        |          | Cof family protein                |       |        |       |        |       |        |        |        |
|          | 4  | 23.7%    | 3    | 13.7%    | 4    | 25.9%    |        |          |                                   |       |        |       |        |       |        |        |        |
| SGO_0824 | 11 | 31.3%    | 10   | 26.5%    | 15   | 38.9%    | 11     | 29.8%    | lepA; GTP-binding protein LepA    |       |        |       |        |       |        |        |        |
|          | 19 | 46.5%    | 13   | 32.1%    | 12   | 34.3%    | 10     | 27.8%    |                                   |       |        |       |        |       |        |        |        |
| SGO_0825 | 9  | 54.0%    | 3    | 20.4%    | 4    | 27.5%    |        |          | lipoprotein, putative             |       |        |       |        |       |        |        |        |
|          | 7  | 35.1%    |      |          | 3    | 20.4%    |        |          |                                   |       |        |       |        |       |        |        |        |
| SGO_0830 | 3  | 7.0%     |      |          | 3    | 8.5%     |        |          | uvrC; excinuclease ABC, C subunit |       |        |       |        |       |        |        |        |
|          | 3  | 7.4%     | 3    | 10.8%    |      |          |        |          |                                   |       |        |       |        |       |        |        |        |
| SGO_0832 | 7  | 73.7%    | 3    | 43.0%    | 3    | 39.5%    |        |          | hypothetical protein SGO_0832     |       |        |       |        |       |        |        |        |
|          | 8  | 78.9%    |      |          | 3    | 47.4%    | 3      | 40.4%    |                                   |       |        |       |        |       |        |        |        |
| SGO_0833 |    |          | 7    | 40.2%    | 3    | 19.2%    |        |          | phosphoesterase-related gene      |       |        |       |        |       |        |        |        |
|          |    |          | 7    | 31.3%    | 5    | 28.1%    |        |          |                                   |       |        |       |        |       |        |        |        |
| SGO_0834 | 4  | 8.1%     |      |          |      |          |        |          | hypothetical protein SGO_0834     |       |        |       |        |       |        |        |        |
|          | 5  | 9.2%     | 3    | 7.4%     |      |          |        |          |                                   |       |        |       |        |       |        |        |        |
| SGO_0835 | 8  | 39.8%    | 12   | 62.7%    | 12   | 58.7%    | 10     | 57.2%    | nitroreductase                    |       |        |       |        |       |        |        |        |
|          | 11 | 63.7%    | 11   | 62.7%    | 11   | 58.7%    | 10     | 61.2%    |                                   |       |        |       |        |       |        |        |        |
| SGO_0836 | 17 | 52.2%    | 21   | 60.0%    | 21   | 65.5%    | 15     | 54.4%    | pepV; dipeptidase PepV            |       |        |       |        |       |        |        |        |
|          | 16 | 46.5%    | 22   | 69.2%    | 22   | 66.0%    | 13     | 48.4%    |                                   |       |        |       |        |       |        |        |        |
| SGO_0841 |    |          | 14   | 51.8%    |      |          |        |          | oxidoreductase                    |       |        |       |        |       |        |        |        |
|          | 4  | 13.9%    | 15   | 56.1%    |      |          |        |          |                                   |       |        |       |        |       |        |        |        |
| SGO_0842 | 4  | 51.0%    | 8    | 62.2%    | 3    | 40.8%    | 3      | 34.7%    | rhodanese family protein          |       |        |       |        |       |        |        |        |
|          | 4  | 51.0%    | 5    | 58.2%    | 5    | 58.2%    | 3      | 34.7%    |                                   |       |        |       |        |       |        |        |        |
| SGO_0848 | 3  | 59.6%    | 5    | 60.6%    | 5    | 60.6%    | 5      | 60.6%    | rpmE; ribosomal protein L31       |       |        |       |        |       |        |        |        |
|          | 3  | 59.6%    | 3    | 59.6%    | 6    | 61.7%    | 4      | 60.6%    |                                   |       |        |       |        |       |        |        |        |

- Show detected proteins only
- Show all proteins

Proteins found:  
1179

Filter by category:

ABC Transporter

Dot Plots Dot Plots

Summary Table

SgFn vs Sg

SgPg vs Sg

SgPgFn vs Sg

SgPg vs SgFn

SgPgFn vs SgFn

SgPgFn vs SgPg

Coverage

Sg

SgFn

SgPg

SgPgFn

Description

Sg

SgFn

SgPg

SgPgFn

Protein

n Coverage

n Coverage

n Coverage

n Coverage

Rep I Rep II

Rep I Rep II

Rep I Rep II

Rep I Rep II

| Protein  | Sg |          | SgFn |          | SgPg |          | SgPgFn |          | Description                                       | Sg    |        | SgFn  |        | SgPg  |        | SgPgFn |        |
|----------|----|----------|------|----------|------|----------|--------|----------|---------------------------------------------------|-------|--------|-------|--------|-------|--------|--------|--------|
|          | n  | Coverage | n    | Coverage | n    | Coverage | n      | Coverage |                                                   | Rep I | Rep II | Rep I | Rep II | Rep I | Rep II | Rep I  | Rep II |
| SGO_0849 | 9  | 31.2%    | 10   | 41.1%    | 10   | 43.3%    |        |          | DHH subfamily 1 protein                           |       |        |       |        |       |        |        |        |
|          | 12 | 43.0%    | 7    | 32.5%    | 8    | 34.7%    |        |          |                                                   |       |        |       |        |       |        |        |        |
| SGO_0850 | 4  | 51.7%    | 5    | 55.8%    | 4    | 51.7%    | 4      | 51.7%    | flavodoxin                                        |       |        |       |        |       |        |        |        |
|          | 3  | 38.1%    | 4    | 51.7%    | 4    | 51.7%    | 4      | 51.7%    |                                                   |       |        |       |        |       |        |        |        |
| SGO_0851 | 6  | 18.8%    | 3    | 15.5%    | 3    | 15.2%    |        |          | putative permease                                 |       |        |       |        |       |        |        |        |
|          | 3  | 11.1%    |      |          | 3    | 15.7%    |        |          |                                                   |       |        |       |        |       |        |        |        |
| SGO_0852 | 8  | 29.9%    | 4    | 15.8%    | 4    | 14.8%    |        |          | TPR domain protein                                |       |        |       |        |       |        |        |        |
|          | 7  | 24.2%    | 5    | 17.8%    | 3    | 12.3%    |        |          |                                                   |       |        |       |        |       |        |        |        |
| SGO_0853 | 6  | 37.2%    | 3    | 21.8%    | 3    | 19.7%    |        |          | budA; alpha-acetolactate decarboxylase            |       |        |       |        |       |        |        |        |
|          | 4  | 25.1%    | 4    | 24.7%    | 3    | 22.2%    |        |          |                                                   |       |        |       |        |       |        |        |        |
| SGO_0854 | 65 | 33.6%    | 23   | 18.9%    | 7    | 5.9%     | 4      | 3.1%     | cshA; surface-associated protein CshA             |       |        |       |        |       |        |        |        |
|          | 71 | 35.1%    | 18   | 15.7%    | 10   | 9.1%     | 4      | 2.6%     |                                                   |       |        |       |        |       |        |        |        |
| SGO_0855 | 10 | 24.2%    | 6    | 14.0%    | 9    | 24.5%    |        |          | fbpA; fibronectin-binding protein A               |       |        |       |        |       |        |        |        |
|          | 12 | 28.9%    | 6    | 18.2%    | 8    | 18.4%    |        |          |                                                   |       |        |       |        |       |        |        |        |
| SGO_0856 | 14 | 68.3%    | 6    | 32.3%    | 12   | 60.8%    | 6      | 27.8%    | ABC transporter, substrate binding protein        |       |        |       |        |       |        |        |        |
|          | 19 | 73.1%    | 5    | 24.6%    | 12   | 56.3%    | 6      | 27.2%    |                                                   |       |        |       |        |       |        |        |        |
| SGO_0858 | 4  | 16.7%    |      |          |      |          |        |          | ABC transporter, ATP-binding protein              |       |        |       |        |       |        |        |        |
|          | 7  | 33.7%    |      |          |      |          |        |          |                                                   |       |        |       |        |       |        |        |        |
| SGO_0859 | 13 | 44.4%    | 10   | 34.7%    | 11   | 39.0%    | 6      | 20.6%    | pheS; phenylalanyl-tRNA synthetase, alpha subunit |       |        |       |        |       |        |        |        |
|          | 13 | 42.1%    | 11   | 36.1%    | 11   | 39.3%    | 9      | 31.2%    |                                                   |       |        |       |        |       |        |        |        |
| SGO_0861 | 25 | 42.9%    | 15   | 29.0%    | 26   | 50.2%    | 16     | 30.3%    | pheT; phenylalanyl-tRNA synthetase, beta subunit  |       |        |       |        |       |        |        |        |
|          | 27 | 40.2%    | 15   | 33.6%    | 26   | 44.9%    | 16     | 29.8%    |                                                   |       |        |       |        |       |        |        |        |
| SGO_0862 | 3  | 14.3%    |      |          |      |          |        |          | hypothetical protein SGO_0862                     |       |        |       |        |       |        |        |        |
|          | 4  | 24.5%    |      |          |      |          |        |          |                                                   |       |        |       |        |       |        |        |        |

 Show detected proteins only Show all proteins Filter by category:

ABC Transporter

Proteins found:

1179

Dot Plots Dot Plots

Summary Table

SgFn vs Sg

SgPg vs Sg

SgPgFn vs Sg

SgPg vs SgFn

SgPgFn vs SgFn

SgPgFn vs SgPg

Coverage

Sg

SgFn

SgPg

SgPgFn

Description

Sg

SgFn

SgPg

SgPgFn

Protein

n Coverage

n Coverage

n Coverage

n Coverage

Rep I Rep II

Rep I Rep II

Rep I Rep II

Rep I Rep II

SGO\_0868

3

59.7%

hypothetical protein SGO\_0868

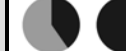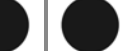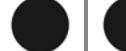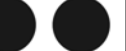

SGO\_0877

3

13.9%

permease domain protein

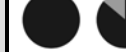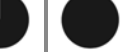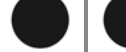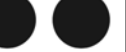

SGO\_0885

7

44.4%

6

40.6%

4

24.9%

3

20.3%

cobyric acid synthase

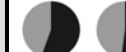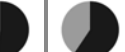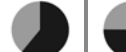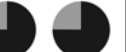

SGO\_0886

4

13.4%

6

18.1%

4

12.8%

Mur ligase family protein

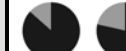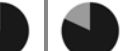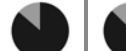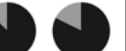

SGO\_0887

7

24.6%

10

28.5%

conserved hypothetical protein TIGR00159

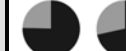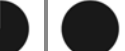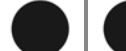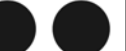

SGO\_0888

6

41.5%

3

25.8%

hypothetical protein SGO\_0888

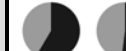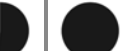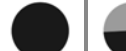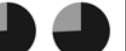

SGO\_0889

14

42.0%

6

19.3%

14

40.9%

9

24.2%

glmM; phosphoglucosamine mutase

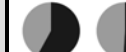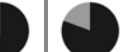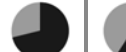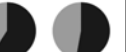

SGO\_0890

7

11.0%

9

17.3%

LPXTG cell wall surface protein, collagen binding domain

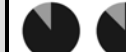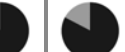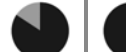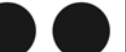

SGO\_0893

16

53.2%

15

56.7%

15

54.4%

10

39.0%

GTP-binding protein

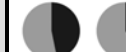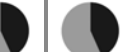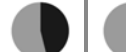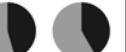

SGO\_0899

4

15.0%

7

24.6%

putative hydrolase or acyltransferase

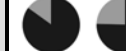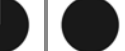

SGO\_0901

10

28.1%

10

29.9%

10

26.8%

3

10.3%

DNA-directed DNA polymerase III

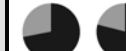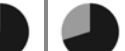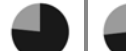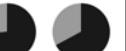

SGO\_0904

3

10.5%

purR; galactose operon repressor GalR

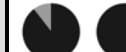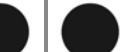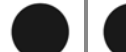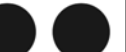 Show detected proteins only Show all proteins Filter by category:

ABC Transporter

Proteins found:

1179

Dot Plots Dot Plots

Summary Table

SgFn vs Sg

SgPg vs Sg

SgPgFn vs Sg

SgPg vs SgFn

SgPgFn vs SgFn

SgPgFn vs SgPg

Coverage

Sg

SgFn

SgPg

SgPgFn

Description

Sg

SgFn

SgPg

SgPgFn

Protein

n Coverage

n Coverage

n Coverage

n Coverage

Rep I Rep II

Rep I Rep II

Rep I Rep II

Rep I Rep II

| Protein  | Sg |          | SgFn |          | SgPg |          | SgPgFn |          | Description                                        | Sg    |        | SgFn  |        | SgPg  |        | SgPgFn |        |
|----------|----|----------|------|----------|------|----------|--------|----------|----------------------------------------------------|-------|--------|-------|--------|-------|--------|--------|--------|
|          | n  | Coverage | n    | Coverage | n    | Coverage | n      | Coverage |                                                    | Rep I | Rep II | Rep I | Rep II | Rep I | Rep II | Rep I  | Rep II |
| SGO_0905 | 5  | 40.8%    |      |          |      |          |        |          | lipoprotein, putative                              |       |        |       |        |       |        |        |        |
|          | 6  | 45.9%    |      |          |      |          |        |          |                                                    |       |        |       |        |       |        |        |        |
| SGO_0906 | 9  | 25.7%    | 15   | 33.3%    | 16   | 36.0%    | 10     | 29.3%    | leuA; 2-isopropylmalate synthase                   |       |        |       |        |       |        |        |        |
|          | 9  | 24.1%    | 15   | 35.1%    | 14   | 35.1%    | 13     | 38.1%    |                                                    |       |        |       |        |       |        |        |        |
| SGO_0907 | 3  | 11.6%    |      |          |      |          |        |          | leuB; 3-isopropylmalate dehydrogenase              |       |        |       |        |       |        |        |        |
|          | 3  | 12.8%    |      |          | 3    | 11.6%    |        |          |                                                    |       |        |       |        |       |        |        |        |
| SGO_0909 |    |          | 4    | 18.7%    |      |          |        |          | leuC; 3-isopropylmalate dehydratase, large subunit |       |        |       |        |       |        |        |        |
|          |    |          | 3    | 16.1%    | 4    | 10.4%    |        |          |                                                    |       |        |       |        |       |        |        |        |
| SGO_0911 | 6  | 36.3%    | 12   | 65.3%    | 14   | 69.1%    | 9      | 54.4%    | hypothetical protein SGO_0911                      |       |        |       |        |       |        |        |        |
|          | 12 | 57.9%    | 11   | 58.7%    | 10   | 57.1%    | 9      | 48.3%    |                                                    |       |        |       |        |       |        |        |        |
| SGO_0915 | 6  | 43.4%    |      |          | 3    | 21.9%    |        |          | proV; ABC-type proline/glycine betaine transporter |       |        |       |        |       |        |        |        |
|          | 8  | 47.5%    |      |          | 3    | 25.2%    |        |          |                                                    |       |        |       |        |       |        |        |        |
| SGO_0916 | 12 | 32.4%    |      |          |      |          |        |          | proWX; ABC transporter membrane-spanning permease  |       |        |       |        |       |        |        |        |
|          | 13 | 36.4%    |      |          |      |          |        |          |                                                    |       |        |       |        |       |        |        |        |
| SGO_0932 | 6  | 15.3%    |      |          |      |          |        |          | galK; galactokinase                                |       |        |       |        |       |        |        |        |
|          | 5  | 17.1%    |      |          |      |          |        |          |                                                    |       |        |       |        |       |        |        |        |
| SGO_0934 |    |          | 3    | 15.9%    |      |          |        |          | galE-2; UDP-glucose 4-epimerase                    |       |        |       |        |       |        |        |        |
|          | 5  | 22.2%    | 3    | 15.9%    |      |          |        |          |                                                    |       |        |       |        |       |        |        |        |
| SGO_0936 | 4  | 6.4%     |      |          |      |          |        |          | phosphoenolpyruvate synthase, putative             |       |        |       |        |       |        |        |        |
|          | 3  | 4.9%     |      |          |      |          | 3      | 5.5%     |                                                    |       |        |       |        |       |        |        |        |
| SGO_0938 |    |          |      |          |      |          | 3      | 15.2%    | Phosphatidylserine decarboxylase proenzyme 2       |       |        |       |        |       |        |        |        |
|          |    |          |      |          |      |          |        |          |                                                    |       |        |       |        |       |        |        |        |
| SGO_0940 | 8  | 16.1%    |      |          |      |          | 3      | 7.6%     | ppsA; phosphoenolpyruvate synthase                 |       |        |       |        |       |        |        |        |
|          | 5  | 8.6%     |      |          |      |          |        |          |                                                    |       |        |       |        |       |        |        |        |

- Show detected proteins only  
 Show all proteins

Proteins found:  
1179

Filter by category:

ABC Transporter

Dot Plots Dot Plots

Summary Table

SgFn vs Sg

SgPg vs Sg

SgPgFn vs Sg

SgPg vs SgFn

SgPgFn vs SgFn

SgPgFn vs SgPg

Coverage

| Protein         | <i>Sg</i> |          | <i>SgFn</i> |          | <i>SgPg</i> |          | <i>SgPgFn</i> |          | Description                                           | <i>Sg</i> |        | <i>SgFn</i> |        | <i>SgPg</i> |        | <i>SgPgFn</i> |        |
|-----------------|-----------|----------|-------------|----------|-------------|----------|---------------|----------|-------------------------------------------------------|-----------|--------|-------------|--------|-------------|--------|---------------|--------|
|                 | n         | Coverage | n           | Coverage | n           | Coverage | n             | Coverage |                                                       | Rep I     | Rep II | Rep I       | Rep II | Rep I       | Rep II | Rep I         | Rep II |
| <b>SGO_0941</b> | 4         | 18.2%    |             |          |             |          |               |          | hypothetical protein SGO_0941                         |           |        |             |        |             |        |               |        |
| <b>SGO_0942</b> | 17        | 8.7%     |             |          |             |          |               |          | zmpC; zinc metalloproteinase C                        |           |        |             |        |             |        |               |        |
|                 | 17        | 10.7%    |             |          |             |          |               |          |                                                       |           |        |             |        |             |        |               |        |
| <b>SGO_0944</b> | 3         | 20.4%    |             |          |             |          |               |          | ABC transporter, ATP-binding protein                  |           |        |             |        |             |        |               |        |
|                 | 4         | 27.4%    |             |          |             |          |               |          |                                                       |           |        |             |        |             |        |               |        |
| <b>SGO_0946</b> | 6         | 21.2%    | 7           | 25.8%    | 7           | 24.6%    | 4             | 15.4%    | Deblocking aminopeptidase                             |           |        |             |        |             |        |               |        |
|                 | 7         | 26.1%    | 8           | 32.5%    | 4           | 15.1%    | 5             | 18.3%    |                                                       |           |        |             |        |             |        |               |        |
| <b>SGO_0948</b> | 9         | 28.0%    | 7           | 16.1%    |             |          |               |          | pgdA; peptidoglycan N-acetylglucosamine deacetylase A |           |        |             |        |             |        |               |        |
|                 | 8         | 20.6%    | 10          | 29.2%    |             |          |               |          |                                                       |           |        |             |        |             |        |               |        |
| <b>SGO_0949</b> | 8         | 27.0%    | 5           | 24.0%    | 5           | 17.0%    | 3             | 10.0%    | deaD; DEAD RNA helicase                               |           |        |             |        |             |        |               |        |
|                 | 8         | 24.0%    | 4           | 15.9%    | 5           | 18.6%    |               |          |                                                       |           |        |             |        |             |        |               |        |
| <b>SGO_0950</b> |           |          | 7           | 31.9%    | 3           | 16.9%    | 3             | 22.4%    | oxidoreductase                                        |           |        |             |        |             |        |               |        |
|                 | 6         | 28.8%    | 5           | 23.3%    | 3           | 16.9%    |               |          |                                                       |           |        |             |        |             |        |               |        |
| <b>SGO_0951</b> | 7         | 43.8%    | 6           | 44.8%    | 7           | 44.3%    | 4             | 27.6%    | udk; uridine kinase                                   |           |        |             |        |             |        |               |        |
|                 | 8         | 48.1%    | 6           | 44.8%    | 7           | 54.8%    | 3             | 22.9%    |                                                       |           |        |             |        |             |        |               |        |
| <b>SGO_0953</b> |           |          |             |          | 3           | 42.1%    |               |          | endoribonuclease L-PSP, putative                      |           |        |             |        |             |        |               |        |
|                 |           |          |             |          | 3           | 42.1%    |               |          |                                                       |           |        |             |        |             |        |               |        |
| <b>SGO_0954</b> | 8         | 32.1%    | 7           | 26.0%    | 6           | 28.7%    | 3             | 11.8%    | ATP-binding protein                                   |           |        |             |        |             |        |               |        |
|                 | 7         | 30.4%    | 6           | 26.4%    | 9           | 37.5%    | 4             | 18.6%    |                                                       |           |        |             |        |             |        |               |        |
| <b>SGO_0955</b> | 5         | 22.8%    | 5           | 21.3%    |             |          |               |          | transporter                                           |           |        |             |        |             |        |               |        |
|                 | 6         | 26.5%    | 4           | 17.3%    | 6           | 27.2%    |               |          |                                                       |           |        |             |        |             |        |               |        |
| <b>SGO_0957</b> | 6         | 46.6%    |             |          |             |          |               |          | hypothetical protein SGO_0957                         |           |        |             |        |             |        |               |        |
|                 | 6         | 46.6%    | 3           | 24.5%    |             |          |               |          |                                                       |           |        |             |        |             |        |               |        |

- Show detected proteins only
- Show all proteins

Proteins found:  
1179

Filter by category:

ABC Transporter

Dot Plots Dot Plots



Summary Table

SgFn vs Sg

SgPg vs Sg

SgPgFn vs Sg

SgPg vs SgFn

SgPgFn vs SgFn

SgPgFn vs SgPg

Coverage

Sg

SgFn

SgPg

SgPgFn

Description

Sg

SgFn

SgPg

SgPgFn

Protein

n Coverage

n Coverage

n Coverage

n Coverage

Rep I Rep II

Rep I Rep II

Rep I Rep II

Rep I Rep II

| Protein  | Sg |          | SgFn |          | SgPg |          | SgPgFn |          | Description                                            | Sg    |        | SgFn  |        | SgPg  |        | SgPgFn |        |
|----------|----|----------|------|----------|------|----------|--------|----------|--------------------------------------------------------|-------|--------|-------|--------|-------|--------|--------|--------|
|          | n  | Coverage | n    | Coverage | n    | Coverage | n      | Coverage |                                                        | Rep I | Rep II | Rep I | Rep II | Rep I | Rep II | Rep I  | Rep II |
| SGO_0959 | 5  | 36.2%    | 6    | 45.7%    | 5    | 36.2%    |        |          | copper homeostasis protein CutC                        |       |        |       |        |       |        |        |        |
|          | 3  | 24.8%    | 6    | 37.6%    | 5    | 36.2%    |        |          |                                                        |       |        |       |        |       |        |        |        |
| SGO_0961 | 5  | 15.4%    |      |          |      |          |        |          | ABC transporter, permease/ATP-binding protein          |       |        |       |        |       |        |        |        |
|          | 7  | 15.9%    |      |          |      |          |        |          |                                                        |       |        |       |        |       |        |        |        |
| SGO_0962 | 3  | 7.6%     |      |          |      |          |        |          | ABC transporter, permease/ATP-binding protein          |       |        |       |        |       |        |        |        |
|          | 3  | 8.3%     |      |          |      |          |        |          |                                                        |       |        |       |        |       |        |        |        |
| SGO_0966 | 9  | 5.6%     | 5    | 4.2%     |      |          |        |          | hsa; streptococcal hemagglutinin                       |       |        |       |        |       |        |        |        |
|          | 10 | 6.3%     | 5    | 3.8%     |      |          |        |          |                                                        |       |        |       |        |       |        |        |        |
| SGO_0969 | 4  | 17.1%    | 3    | 13.8%    |      |          |        |          | nss; nucleotide sugar synthetase-like protein          |       |        |       |        |       |        |        |        |
|          | 3  | 17.1%    |      |          |      |          |        |          |                                                        |       |        |       |        |       |        |        |        |
| SGO_0971 | 4  | 9.1%     |      |          |      |          |        |          | asp1; accessory secretory protein                      |       |        |       |        |       |        |        |        |
|          | 4  | 9.9%     |      |          |      |          |        |          |                                                        |       |        |       |        |       |        |        |        |
| SGO_0972 |    |          |      |          |      |          |        |          | asp2; accessory secretory protein                      |       |        |       |        |       |        |        |        |
|          | 5  | 12.0%    |      |          |      |          |        |          |                                                        |       |        |       |        |       |        |        |        |
| SGO_0975 | 6  | 16.6%    |      |          |      |          |        |          | gtaA; glycosyl transferase, group 1 SP1758             |       |        |       |        |       |        |        |        |
|          | 4  | 10.3%    |      |          |      |          |        |          |                                                        |       |        |       |        |       |        |        |        |
| SGO_0979 | 4  | 15.7%    |      |          |      |          |        |          | degV family protein                                    |       |        |       |        |       |        |        |        |
|          | 4  | 16.7%    |      |          |      |          |        |          |                                                        |       |        |       |        |       |        |        |        |
| SGO_0980 | 3  | 18.0%    |      |          |      |          |        |          | transcriptional regulator, TetR family domain protein  |       |        |       |        |       |        |        |        |
|          |    |          |      |          |      |          |        |          |                                                        |       |        |       |        |       |        |        |        |
| SGO_0981 | 6  | 40.6%    |      |          | 4    | 31.6%    |        |          | comE operon protein 2 family                           |       |        |       |        |       |        |        |        |
|          | 5  | 41.9%    | 3    | 20.6%    |      |          |        |          |                                                        |       |        |       |        |       |        |        |        |
| SGO_0982 | 19 | 68.0%    | 4    | 25.4%    | 11   | 47.9%    | 4      | 24.3%    | amino acid ABC transporter, amino acid-binding protein |       |        |       |        |       |        |        |        |
|          | 23 | 70.8%    | 3    | 17.6%    | 10   | 49.6%    | 4      | 25.4%    |                                                        |       |        |       |        |       |        |        |        |

- Show detected proteins only  
 Show all proteins

Proteins found:  
1179

Filter by category:

ABC Transporter

Dot Plots Dot Plots

Summary Table SgFn vs Sg SgPg vs Sg SgPgFn vs Sg SgPg vs SgFn SgPgFn vs SgFn SgPgFn vs SgPg Coverage

| Protein  | Sg |          | SgFn |          | SgPg |          | SgPgFn |          | Description                                                | Sg    |        | SgFn  |        | SgPg  |        | SgPgFn |        |
|----------|----|----------|------|----------|------|----------|--------|----------|------------------------------------------------------------|-------|--------|-------|--------|-------|--------|--------|--------|
|          | n  | Coverage | n    | Coverage | n    | Coverage | n      | Coverage |                                                            | Rep I | Rep II | Rep I | Rep II | Rep I | Rep II | Rep I  | Rep II |
| SGO_0983 | 5  | 36.9%    |      |          |      |          |        |          | amino acid ABC transporter, ATP-binding protein SP0709     |       |        |       |        |       |        |        |        |
|          | 5  | 36.9%    |      |          | 3    | 21.0%    |        |          |                                                            |       |        |       |        |       |        |        |        |
| SGO_0986 | 5  | 26.5%    |      |          |      |          |        |          | hypothetical protein SGO_0986                              |       |        |       |        |       |        |        |        |
|          | 5  | 26.5%    |      |          |      |          |        |          |                                                            |       |        |       |        |       |        |        |        |
| SGO_0987 | 12 | 30.6%    | 16   | 38.4%    | 16   | 40.4%    | 11     | 35.9%    | metK; S-adenosylmethionine synthetase                      |       |        |       |        |       |        |        |        |
|          | 13 | 34.1%    | 14   | 39.4%    | 10   | 30.3%    | 10     | 28.0%    |                                                            |       |        |       |        |       |        |        |        |
| SGO_0991 | 3  | 53.6%    |      |          |      |          |        |          | hypothetical protein SGO_0991                              |       |        |       |        |       |        |        |        |
|          |    |          |      |          | 3    | 53.6%    |        |          |                                                            |       |        |       |        |       |        |        |        |
| SGO_0993 |    |          | 3    | 8.5%     |      |          | 4      | 12.9%    | GTP-binding protein HfIX                                   |       |        |       |        |       |        |        |        |
|          |    |          | 4    | 10.2%    | 5    | 13.8%    |        |          |                                                            |       |        |       |        |       |        |        |        |
| SGO_0994 | 3  | 21.7%    |      |          | 3    | 24.6%    |        |          | hypothetical protein SGO_0994                              |       |        |       |        |       |        |        |        |
|          | 5  | 39.1%    |      |          | 3    | 24.6%    |        |          |                                                            |       |        |       |        |       |        |        |        |
| SGO_0995 | 7  | 23.0%    | 4    | 22.7%    | 13   | 56.0%    | 4      | 20.4%    | metallo-beta-lactamase superfamily protein                 |       |        |       |        |       |        |        |        |
|          | 7  | 31.4%    | 6    | 28.5%    | 6    | 27.5%    |        |          |                                                            |       |        |       |        |       |        |        |        |
| SGO_0996 | 5  | 25.5%    |      |          |      |          |        |          | oxidoreductase, short-chain dehydrogenase/reductase family |       |        |       |        |       |        |        |        |
|          | 6  | 38.6%    |      |          |      |          |        |          |                                                            |       |        |       |        |       |        |        |        |
| SGO_0997 | 7  | 34.6%    | 3    | 17.5%    | 4    | 23.1%    |        |          | hypothetical protein SGO_0997                              |       |        |       |        |       |        |        |        |
|          | 7  | 34.6%    | 3    | 17.5%    | 3    | 17.5%    |        |          |                                                            |       |        |       |        |       |        |        |        |
| SGO_1000 | 4  | 8.1%     | 9    | 19.2%    | 9    | 17.9%    |        |          | recJ; single-stranded-DNA-specific exonuclease RecJ        |       |        |       |        |       |        |        |        |
|          |    |          | 11   | 22.9%    | 7    | 14.1%    |        |          |                                                            |       |        |       |        |       |        |        |        |
| SGO_1001 | 11 | 67.1%    | 9    | 67.6%    | 11   | 78.2%    | 12     | 72.9%    | apt; adenine phosphoribosyltransferase                     |       |        |       |        |       |        |        |        |
|          | 11 | 77.6%    | 8    | 68.8%    | 13   | 82.9%    | 10     | 75.9%    |                                                            |       |        |       |        |       |        |        |        |
| SGO_1002 |    |          |      |          |      |          |        |          | metA; homoserine O-succinyltransferase                     |       |        |       |        |       |        |        |        |
|          | 4  | 15.3%    |      |          |      |          |        |          |                                                            |       |        |       |        |       |        |        |        |

Show detected proteins only  
 Show all proteins  
 Filter by category:

Proteins found: 1179

Dot Plots Dot Plots

Summary Table

SgFn vs Sg

SgPg vs Sg

SgPgFn vs Sg

SgPg vs SgFn

SgPgFn vs SgFn

SgPgFn vs SgPg

Coverage

Sg

SgFn

SgPg

SgPgFn

Description

Sg

SgFn

SgPg

SgPgFn

Protein

n Coverage

n Coverage

n Coverage

n Coverage

Rep I Rep II

Rep I Rep II

Rep I Rep II

Rep I Rep II

| Protein  | Sg |          | SgFn |          | SgPg |          | SgPgFn |          | Description                                          | Sg    |        | SgFn  |        | SgPg  |        | SgPgFn |        |
|----------|----|----------|------|----------|------|----------|--------|----------|------------------------------------------------------|-------|--------|-------|--------|-------|--------|--------|--------|
|          | n  | Coverage | n    | Coverage | n    | Coverage | n      | Coverage |                                                      | Rep I | Rep II | Rep I | Rep II | Rep I | Rep II | Rep I  | Rep II |
| SGO_1003 | 7  | 38.5%    | 3    | 16.4%    | 5    | 29.6%    |        |          | DNA replication protein DnaD                         |       |        |       |        |       |        |        |        |
|          | 5  | 29.6%    | 4    | 23.9%    | 6    | 32.3%    |        |          |                                                      |       |        |       |        |       |        |        |        |
| SGO_1004 |    |          | 3    | 14.1%    | 4    | 17.2%    |        |          | glutathione S-transferase family protein             |       |        |       |        |       |        |        |        |
|          | 3  | 14.1%    | 5    | 25.2%    | 3    | 13.4%    |        |          |                                                      |       |        |       |        |       |        |        |        |
| SGO_1005 | 3  | 21.0%    | 5    | 34.5%    | 5    | 27.1%    | 4      | 27.5%    | Bcl-2 family protein                                 |       |        |       |        |       |        |        |        |
|          | 5  | 30.1%    | 5    | 27.1%    | 6    | 39.3%    | 3      | 23.1%    |                                                      |       |        |       |        |       |        |        |        |
| SGO_1006 |    |          | 3    | 15.8%    | 4    | 22.6%    |        |          | conserved hypothetical protein TIGR00486             |       |        |       |        |       |        |        |        |
|          | 3  | 14.3%    |      |          | 3    | 15.8%    |        |          |                                                      |       |        |       |        |       |        |        |        |
| SGO_1007 |    |          |      |          | 3    | 11.5%    |        |          | oxidoreductase, DadA family protein SP1608           |       |        |       |        |       |        |        |        |
|          |    |          |      |          | 3    | 11.5%    |        |          |                                                      |       |        |       |        |       |        |        |        |
| SGO_1009 | 13 | 63.3%    | 23   | 87.9%    | 17   | 77.2%    | 15     | 77.5%    | rfbA-1; glucose-1-phosphate thymidyltransferase      |       |        |       |        |       |        |        |        |
|          | 16 | 65.4%    | 21   | 92.0%    | 19   | 85.1%    | 15     | 70.6%    |                                                      |       |        |       |        |       |        |        |        |
| SGO_1010 | 7  | 42.6%    | 8    | 47.2%    | 7    | 42.6%    | 7      | 42.6%    | rmIC; dTDP-4-keto-6-deoxyglucose-3,5-epimerase       |       |        |       |        |       |        |        |        |
|          | 9  | 47.2%    | 7    | 48.2%    | 7    | 42.6%    | 6      | 38.1%    |                                                      |       |        |       |        |       |        |        |        |
| SGO_1011 | 10 | 38.2%    | 20   | 64.4%    | 16   | 51.7%    | 14     | 47.7%    | rfbB-1; dTDP-glucose 4,6-dehydratase                 |       |        |       |        |       |        |        |        |
|          | 16 | 53.2%    | 17   | 57.5%    | 17   | 51.7%    | 13     | 49.1%    |                                                      |       |        |       |        |       |        |        |        |
| SGO_1012 | 14 | 50.1%    | 17   | 56.9%    | 14   | 47.5%    | 11     | 43.4%    | galE-1; UDP-glucose 4-epimerase                      |       |        |       |        |       |        |        |        |
|          | 12 | 48.1%    | 18   | 62.8%    | 14   | 57.8%    | 14     | 55.8%    |                                                      |       |        |       |        |       |        |        |        |
| SGO_1013 | 6  | 37.3%    |      |          |      |          | 3      | 17.8%    | Glycosyltransferase involved in cell wall biogenesis |       |        |       |        |       |        |        |        |
|          | 7  | 41.5%    | 3    | 16.9%    | 3    | 23.7%    |        |          |                                                      |       |        |       |        |       |        |        |        |
| SGO_1016 | 8  | 41.5%    | 3    | 12.3%    | 5    | 26.9%    | 3      | 15.8%    | putative glycosyltransferase                         |       |        |       |        |       |        |        |        |
|          | 9  | 46.9%    |      |          | 5    | 27.3%    |        |          |                                                      |       |        |       |        |       |        |        |        |
| SGO_1018 | 4  | 9.1%     |      |          |      |          |        |          | hypothetical protein SGO_1018                        |       |        |       |        |       |        |        |        |
|          | 3  | 8.1%     |      |          |      |          |        |          |                                                      |       |        |       |        |       |        |        |        |

 Show detected proteins only Show all proteins Filter by category:

ABC Transporter

Proteins found:

1179

Dot Plots Dot Plots

Summary Table

SgFn vs Sg

SgPg vs Sg

SgPgFn vs Sg

SgPg vs SgFn

SgPgFn vs SgFn

SgPgFn vs SgPg

Coverage

Sg

SgFn

SgPg

SgPgFn

Description

Sg

SgFn

SgPg

SgPgFn

Protein

n Coverage

n Coverage

n Coverage

n Coverage

Rep I Rep II

Rep I Rep II

Rep I Rep II

Rep I Rep II

SGO\_1019

7

29.2%

4

19.2%

3

13.6%

glycosyl transferase

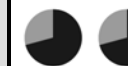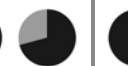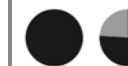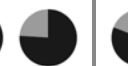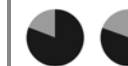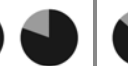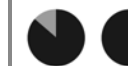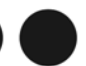

SGO\_1020

13

55.1%

15

62.5%

12

57.2%

8

32.9%

rfbD; dTDP-4-dehydrorhamnose reductase

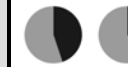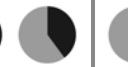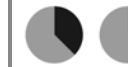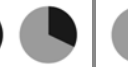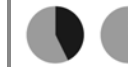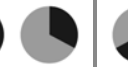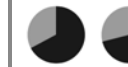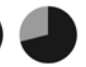

SGO\_1021

9

38.2%

rgpA; rhamnosyltransferase, putative

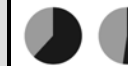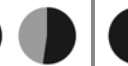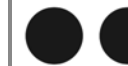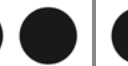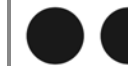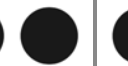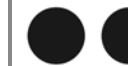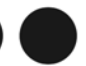

SGO\_1022

8

35.8%

rhamnosyltransferase

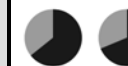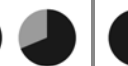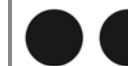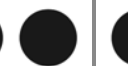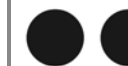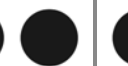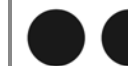

SGO\_1024

15

37.8%

4

15.5%

9

26.5%

putative polysaccharide ABC transporter

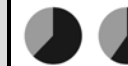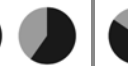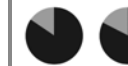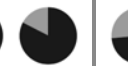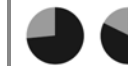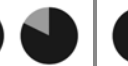

SGO\_1025

12

39.6%

8

30.7%

9

28.1%

9

24.7%

rgp; glycosyltransferase

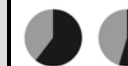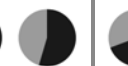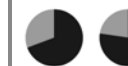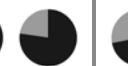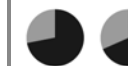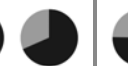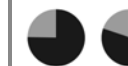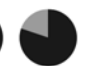

SGO\_1026

22

34.7%

9

16.0%

8

19.2%

3

5.8%

rhamnosyltransferase

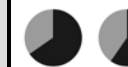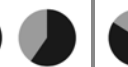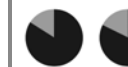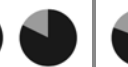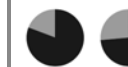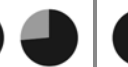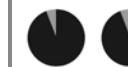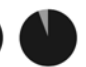

SGO\_1027

11

20.2%

hypothetical protein SGO\_1027

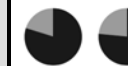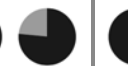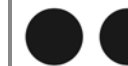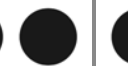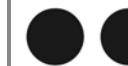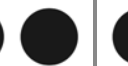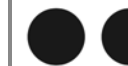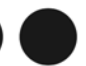

SGO\_1028

3

28.4%

hypothetical protein SGO\_1028

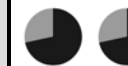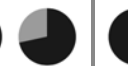

SGO\_1030

3

28.9%

hypothetical protein SGO\_1030

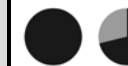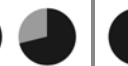

SGO\_1031

6

39.1%

6

43.1%

7

48.0%

3

23.1%

cmk; cytidylate kinase

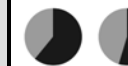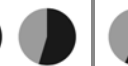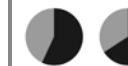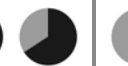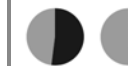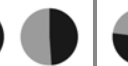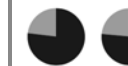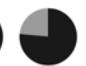

SGO\_1032

4

29.0%

4

30.7%

4

24.4%

infC; translation initiation factor IF-3

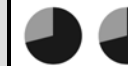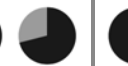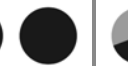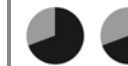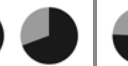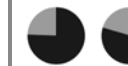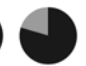 Show detected proteins only Show all proteins

Proteins found:

1179

 Filter by category:

ABC Transporter

Dot Plots Dot Plots

Summary Table

SgFn vs Sg

SgPg vs Sg

SgPgFn vs Sg

SgPg vs SgFn

SgPgFn vs SgFn

SgPgFn vs SgPg

Coverage

Sg

SgFn

SgPg

SgPgFn

Description

Sg

SgFn

SgPg

SgPgFn

Protein

n Coverage

n Coverage

n Coverage

n Coverage

Rep I Rep II

Rep I Rep II

Rep I Rep II

Rep I Rep II

| Protein  | Sg |          | SgFn |          | SgPg |          | SgPgFn |          | Description                                                      | Sg    |        | SgFn  |        | SgPg  |        | SgPgFn |        |
|----------|----|----------|------|----------|------|----------|--------|----------|------------------------------------------------------------------|-------|--------|-------|--------|-------|--------|--------|--------|
|          | n  | Coverage | n    | Coverage | n    | Coverage | n      | Coverage |                                                                  | Rep I | Rep II | Rep I | Rep II | Rep I | Rep II | Rep I  | Rep II |
| SGO_1033 | 3  | 18.2%    | 5    | 33.3%    |      |          | 3      | 18.2%    | rpmI; ribosomal protein L35                                      |       |        |       |        |       |        |        |        |
|          | 5  | 30.3%    | 4    | 18.2%    |      |          | 4      | 18.2%    |                                                                  |       |        |       |        |       |        |        |        |
| SGO_1034 | 7  | 52.1%    | 6    | 54.6%    | 7    | 52.1%    | 5      | 47.1%    | rplT; ribosomal protein L20                                      |       |        |       |        |       |        |        |        |
|          | 7  | 52.1%    | 8    | 73.9%    | 7    | 52.1%    | 5      | 51.3%    |                                                                  |       |        |       |        |       |        |        |        |
| SGO_1035 | 4  | 34.1%    | 5    | 36.5%    | 3    | 28.6%    | 3      | 28.6%    | gloA; lactoylglutathione lyase                                   |       |        |       |        |       |        |        |        |
|          | 4  | 34.1%    | 5    | 38.1%    | 3    | 28.6%    | 3      | 28.6%    |                                                                  |       |        |       |        |       |        |        |        |
| SGO_1036 | 10 | 54.9%    | 13   | 69.1%    | 7    | 45.5%    | 3      | 17.5%    | amino acid ABC transporter, ATP-binding protein SP1242           |       |        |       |        |       |        |        |        |
|          | 9  | 52.0%    | 6    | 35.8%    | 10   | 64.6%    | 3      | 20.3%    |                                                                  |       |        |       |        |       |        |        |        |
| SGO_1037 | 9  | 26.6%    | 3    | 8.0%     | 5    | 9.5%     |        |          | glutamine ABC transporter permease and substrate binding protein |       |        |       |        |       |        |        |        |
|          | 13 | 37.1%    | 4    | 14.2%    | 8    | 21.6%    |        |          |                                                                  |       |        |       |        |       |        |        |        |
| SGO_1038 | 6  | 10.6%    | 9    | 19.2%    | 7    | 14.8%    | 6      | 10.1%    | uvrB; excinuclease ABC, B subunit                                |       |        |       |        |       |        |        |        |
|          | 8  | 15.6%    | 9    | 19.9%    | 8    | 16.0%    | 7      | 13.1%    |                                                                  |       |        |       |        |       |        |        |        |
| SGO_1039 | 4  | 18.2%    |      |          |      |          |        |          | hypothetical protein SGO_1039                                    |       |        |       |        |       |        |        |        |
|          | 3  | 10.5%    |      |          |      |          |        |          |                                                                  |       |        |       |        |       |        |        |        |
| SGO_1041 |    |          | 3    | 32.0%    | 3    | 27.1%    |        |          | hypothetical protein SGO_1041                                    |       |        |       |        |       |        |        |        |
|          | 3  | 24.3%    |      |          | 4    | 40.3%    |        |          |                                                                  |       |        |       |        |       |        |        |        |
| SGO_1044 |    |          |      |          | 3    | 26.5%    |        |          | MutT/nudix family protein                                        |       |        |       |        |       |        |        |        |
|          | 3  | 22.6%    | 3    | 23.9%    | 4    | 32.9%    |        |          |                                                                  |       |        |       |        |       |        |        |        |
| SGO_1047 | 10 | 29.2%    |      |          | 8    | 22.2%    | 5      | 14.6%    | hypothetical protein SGO_1047                                    |       |        |       |        |       |        |        |        |
|          | 14 | 35.4%    | 3    | 9.7%     | 9    | 27.1%    | 3      | 9.4%     |                                                                  |       |        |       |        |       |        |        |        |
| SGO_1049 | 3  | 18.8%    |      |          | 4    | 21.6%    | 3      | 20.5%    | tRNA pseudouridine synthase B                                    |       |        |       |        |       |        |        |        |
|          | 6  | 29.8%    |      |          | 4    | 22.6%    |        |          |                                                                  |       |        |       |        |       |        |        |        |
| SGO_1050 |    |          |      |          | 4    | 15.4%    |        |          | ribF; riboflavin biosynthesis protein RibF                       |       |        |       |        |       |        |        |        |
|          | 3  | 9.8%     | 3    | 10.5%    | 3    | 12.1%    | 4      | 16.4%    |                                                                  |       |        |       |        |       |        |        |        |

 Show detected proteins only Show all proteins Filter by category:

ABC Transporter

Proteins found:

1179

Dot Plots Dot Plots

Summary Table

SgFn vs Sg

SgPg vs Sg

SgPgFn vs Sg

SgPg vs SgFn

SgPgFn vs SgFn

SgPgFn vs SgPg

Coverage

| Protein  | <i>Sg</i> |          | <i>SgFn</i> |          | <i>SgPg</i> |          | <i>SgPgFn</i> |          | Description                                                                                                       | <i>Sg</i> |        | <i>SgFn</i> |        | <i>SgPg</i> |        | <i>SgPgFn</i> |        |
|----------|-----------|----------|-------------|----------|-------------|----------|---------------|----------|-------------------------------------------------------------------------------------------------------------------|-----------|--------|-------------|--------|-------------|--------|---------------|--------|
|          | n         | Coverage | n           | Coverage | n           | Coverage | n             | Coverage |                                                                                                                   | Rep I     | Rep II | Rep I       | Rep II | Rep I       | Rep II | Rep I         | Rep II |
| SGO_1051 |           |          |             |          | 5           | 43.6%    | 3             | 21.8%    | negative regulator of proteolysis                                                                                 |           |        |             |        |             |        |               |        |
| SGO_1054 | 4         | 13.8%    |             |          | 3           | 14.5%    |               |          | NOL1/NOP2/sun family protein                                                                                      |           |        |             |        |             |        |               |        |
|          | 5         | 18.2%    |             |          |             |          |               |          |                                                                                                                   |           |        |             |        |             |        |               |        |
| SGO_1055 | 12        | 67.2%    |             |          | 4           | 21.2%    |               |          | phosphate ABC transporter, phosphate-binding protein                                                              |           |        |             |        |             |        |               |        |
|          | 13        | 71.3%    |             |          | 5           | 25.9%    |               |          |                                                                                                                   |           |        |             |        |             |        |               |        |
| SGO_1057 |           |          |             |          |             |          |               |          | pstA; phosphate ABC transporter, permease protein PstA                                                            |           |        |             |        |             |        |               |        |
|          | 4         | 10.2%    |             |          |             |          |               |          |                                                                                                                   |           |        |             |        |             |        |               |        |
| SGO_1058 | 12        | 40.8%    |             |          | 5           | 17.6%    | 4             | 13.1%    | pstB; Phosphate import ATP-binding protein pstB 2 (Phosphate-transporting ATPase 2) (ABC phosphate transporter 2) |           |        |             |        |             |        |               |        |
|          | 14        | 46.1%    |             |          | 4           | 15.4%    |               |          |                                                                                                                   |           |        |             |        |             |        |               |        |
| SGO_1059 | 9         | 46.4%    | 3           | 17.9%    | 7           | 48.4%    | 7             | 44.8%    | pstB; Phosphate import ATP-binding protein pstB 1 (Phosphate-transporting ATPase 1) (ABC phosphate transporter 1) |           |        |             |        |             |        |               |        |
|          | 9         | 46.4%    | 3           | 17.9%    | 8           | 48.8%    | 6             | 38.5%    |                                                                                                                   |           |        |             |        |             |        |               |        |
| SGO_1060 | 11        | 55.8%    | 7           | 39.2%    | 9           | 54.4%    | 6             | 37.8%    | phosphate transport system regulatory protein                                                                     |           |        |             |        |             |        |               |        |
|          | 11        | 55.8%    | 7           | 41.0%    | 12          | 57.6%    | 6             | 37.8%    |                                                                                                                   |           |        |             |        |             |        |               |        |
| SGO_1065 | 8         | 41.7%    | 7           | 42.8%    | 4           | 32.1%    | 4             | 32.1%    | hypothetical protein SGO_1065                                                                                     |           |        |             |        |             |        |               |        |
|          | 8         | 43.3%    | 4           | 32.1%    | 4           | 32.1%    | 3             | 27.8%    |                                                                                                                   |           |        |             |        |             |        |               |        |
| SGO_1066 | 12        | 37.3%    | 8           | 23.9%    | 5           | 12.0%    |               |          | hypothetical protein SGO_1066                                                                                     |           |        |             |        |             |        |               |        |
|          | 14        | 37.0%    | 10          | 25.0%    | 4           | 11.1%    |               |          |                                                                                                                   |           |        |             |        |             |        |               |        |
| SGO_1067 |           |          | 3           | 64.3%    |             |          |               |          | hypothetical protein SGO_1067                                                                                     |           |        |             |        |             |        |               |        |
|          | 3         | 57.1%    |             |          |             |          |               |          |                                                                                                                   |           |        |             |        |             |        |               |        |
| SGO_1069 | 32        | 45.6%    | 27          | 44.3%    | 36          | 53.5%    | 21            | 37.5%    | membrane alanyl aminopeptidase                                                                                    |           |        |             |        |             |        |               |        |
|          | 27        | 40.0%    | 35          | 54.9%    | 31          | 51.0%    | 20            | 35.1%    |                                                                                                                   |           |        |             |        |             |        |               |        |
| SGO_1072 |           |          | 5           | 31.3%    | 4           | 21.4%    |               |          | ciaR; Transcriptional regulatory protein CiaR                                                                     |           |        |             |        |             |        |               |        |
|          | 3         | 14.7%    | 7           | 34.4%    |             |          |               |          |                                                                                                                   |           |        |             |        |             |        |               |        |

 Show detected proteins only Show all proteins Filter by category:

ABC Transporter

Proteins found:

1179

Dot Plots Dot Plots

Summary Table

SgFn vs Sg

SgPg vs Sg

SgPgFn vs Sg

SgPg vs SgFn

SgPgFn vs SgFn

SgPgFn vs SgPg

Coverage

Sg

SgFn

SgPg

SgPgFn

Description

Sg

SgFn

SgPg

SgPgFn

Protein

n Coverage

n Coverage

n Coverage

n Coverage

Rep I Rep II

Rep I Rep II

Rep I Rep II

Rep I Rep II

| Protein  | Sg |          | SgFn |          | SgPg |          | SgPgFn |          | Description                                       | Sg    |        | SgFn  |        | SgPg  |        | SgPgFn |        |
|----------|----|----------|------|----------|------|----------|--------|----------|---------------------------------------------------|-------|--------|-------|--------|-------|--------|--------|--------|
|          | n  | Coverage | n    | Coverage | n    | Coverage | n      | Coverage |                                                   | Rep I | Rep II | Rep I | Rep II | Rep I | Rep II | Rep I  | Rep II |
| SGO_1073 | 6  | 17.6%    |      |          | 4    | 9.9%     |        |          | Sensor protein CiaH                               |       |        |       |        |       |        |        |        |
|          | 6  | 17.6%    | 5    | 15.2%    |      |          |        |          |                                                   |       |        |       |        |       |        |        |        |
| SGO_1075 |    |          | 7    | 22.8%    |      |          |        |          | alpha-amylase precursor                           |       |        |       |        |       |        |        |        |
|          | 4  | 12.2%    | 5    | 15.3%    | 3    | 11.2%    |        |          |                                                   |       |        |       |        |       |        |        |        |
| SGO_1077 | 5  | 19.6%    | 3    | 13.7%    | 4    | 14.4%    |        |          | coaA; pantothenate kinase                         |       |        |       |        |       |        |        |        |
|          | 6  | 25.2%    | 5    | 18.6%    | 5    | 14.4%    |        |          |                                                   |       |        |       |        |       |        |        |        |
| SGO_1078 |    |          | 3    | 35.0%    | 3    | 35.0%    |        |          | methyltransferase domain protein                  |       |        |       |        |       |        |        |        |
|          |    |          | 4    | 42.6%    | 3    | 35.0%    |        |          |                                                   |       |        |       |        |       |        |        |        |
| SGO_1079 | 10 | 31.3%    | 9    | 29.2%    | 12   | 39.8%    | 5      | 20.0%    | pdp; pyrimidine-nucleoside phosphorylase          |       |        |       |        |       |        |        |        |
|          | 11 | 28.9%    | 11   | 36.5%    | 10   | 35.5%    | 7      | 25.6%    |                                                   |       |        |       |        |       |        |        |        |
| SGO_1080 | 11 | 68.6%    | 12   | 70.9%    | 12   | 70.9%    | 13     | 72.3%    | deoC; deoxyribose-phosphate aldolase              |       |        |       |        |       |        |        |        |
|          | 12 | 70.9%    | 10   | 61.4%    | 13   | 72.3%    | 12     | 70.9%    |                                                   |       |        |       |        |       |        |        |        |
| SGO_1081 | 3  | 38.8%    |      |          | 4    | 58.1%    | 3      | 44.2%    | cdd; cytidine deaminase                           |       |        |       |        |       |        |        |        |
|          | 5  | 55.0%    |      |          | 3    | 44.2%    |        |          |                                                   |       |        |       |        |       |        |        |        |
| SGO_1082 | 22 | 66.5%    | 22   | 65.9%    | 19   | 65.9%    | 20     | 65.9%    | lipoprotein                                       |       |        |       |        |       |        |        |        |
|          | 31 | 75.0%    | 20   | 62.2%    | 20   | 63.4%    | 18     | 63.4%    |                                                   |       |        |       |        |       |        |        |        |
| SGO_1083 |    |          | 19   | 53.8%    | 28   | 61.1%    | 19     | 43.4%    | sugar ABC transporter, ATP-binding protein SP0846 |       |        |       |        |       |        |        |        |
|          |    |          | 20   | 49.1%    | 24   | 58.1%    | 18     | 47.6%    |                                                   |       |        |       |        |       |        |        |        |
| SGO_1088 | 3  | 17.9%    |      |          | 7    | 28.5%    | 3      | 23.2%    | transcription regulator, LysR family              |       |        |       |        |       |        |        |        |
|          | 5  | 24.8%    |      |          | 4    | 20.9%    |        |          |                                                   |       |        |       |        |       |        |        |        |
| SGO_1090 | 7  | 31.1%    |      |          | 9    | 33.1%    |        |          | pseudouridine synthase, RluA family               |       |        |       |        |       |        |        |        |
|          | 8  | 33.1%    | 4    | 20.9%    | 8    | 33.4%    |        |          |                                                   |       |        |       |        |       |        |        |        |
| SGO_1091 | 3  | 20.5%    |      |          |      |          |        |          | hypothetical protein SGO_1091                     |       |        |       |        |       |        |        |        |
|          | 4  | 29.0%    |      |          |      |          |        |          |                                                   |       |        |       |        |       |        |        |        |

- Show detected proteins only  
 Show all proteins

Proteins found:  
1179

Filter by category:

ABC Transporter

Dot Plots Dot Plots

Summary Table

SgFn vs Sg

SgPg vs Sg

SgPgFn vs Sg

SgPg vs SgFn

SgPgFn vs SgFn

SgPgFn vs SgPg

Coverage

| Protein  | Sg |          | SgFn |          | SgPg |          | SgPgFn |          | Description                                            | Sg    |        | SgFn  |        | SgPg  |        | SgPgFn |        |
|----------|----|----------|------|----------|------|----------|--------|----------|--------------------------------------------------------|-------|--------|-------|--------|-------|--------|--------|--------|
|          | n  | Coverage | n    | Coverage | n    | Coverage | n      | Coverage |                                                        | Rep I | Rep II | Rep I | Rep II | Rep I | Rep II | Rep I  | Rep II |
| SGO_1096 | 10 | 53.1%    | 15   | 64.6%    | 12   | 61.4%    | 12     | 61.4%    | butA; acetoin dehydrogenase                            |       |        |       |        |       |        |        |        |
|          | 10 | 58.3%    | 20   | 82.7%    | 12   | 61.4%    | 11     | 61.4%    |                                                        |       |        |       |        |       |        |        |        |
| SGO_1097 |    |          | 3    | 9.8%     |      |          |        |          | proB; glutamate 5-kinase                               |       |        |       |        |       |        |        |        |
|          | 3  | 8.7%     |      |          |      |          |        |          |                                                        |       |        |       |        |       |        |        |        |
| SGO_1098 |    |          | 8    | 31.4%    | 6    | 22.9%    | 3      | 13.8%    | proA; gamma-glutamyl phosphate reductase               |       |        |       |        |       |        |        |        |
|          | 4  | 11.9%    | 6    | 21.4%    | 7    | 26.4%    | 3      | 14.3%    |                                                        |       |        |       |        |       |        |        |        |
| SGO_1099 |    |          | 4    | 18.7%    |      |          |        |          | proC; pyrroline-5-carboxylate reductase                |       |        |       |        |       |        |        |        |
|          | 3  | 19.0%    | 5    | 23.9%    |      |          |        |          |                                                        |       |        |       |        |       |        |        |        |
| SGO_1100 |    |          |      |          |      |          |        |          | phnA; alkylphosphonate utilization operon protein PhnA |       |        |       |        |       |        |        |        |
|          | 4  | 34.8%    |      |          |      |          |        |          |                                                        |       |        |       |        |       |        |        |        |
| SGO_1103 | 3  | 13.4%    |      |          |      |          |        |          | carA; carbamoyl-phosphate synthase, small subunit      |       |        |       |        |       |        |        |        |
|          | 3  | 14.8%    |      |          |      |          |        |          |                                                        |       |        |       |        |       |        |        |        |
| SGO_1104 | 14 | 20.8%    |      |          |      |          | 4      | 4.2%     | carB; carbamoyl-phosphate synthase, large subunit      |       |        |       |        |       |        |        |        |
|          | 9  | 11.2%    | 4    | 5.9%     |      |          |        |          |                                                        |       |        |       |        |       |        |        |        |
| SGO_1107 | 7  | 49.1%    |      |          |      |          |        |          | PyrR bifunctional protein                              |       |        |       |        |       |        |        |        |
|          | 7  | 49.1%    | 3    | 28.3%    | 4    | 33.5%    | 3      | 26.6%    |                                                        |       |        |       |        |       |        |        |        |
| SGO_1109 | 14 | 50.3%    | 9    | 38.6%    | 14   | 48.0%    | 10     | 45.1%    | pyrB; aspartate carbamoyltransferase                   |       |        |       |        |       |        |        |        |
|          | 15 | 52.9%    | 10   | 38.9%    | 16   | 57.8%    | 8      | 37.3%    |                                                        |       |        |       |        |       |        |        |        |
| SGO_1110 | 15 | 26.4%    |      |          |      |          |        |          | surface antigen SCP-like domain                        |       |        |       |        |       |        |        |        |
|          | 21 | 35.4%    | 4    | 7.9%     |      |          |        |          |                                                        |       |        |       |        |       |        |        |        |
| SGO_1111 | 13 | 59.1%    | 4    | 21.5%    | 7    | 40.1%    | 4      | 21.9%    | fruR; phosphotransferase system repressor              |       |        |       |        |       |        |        |        |
|          | 14 | 60.3%    | 3    | 18.2%    | 4    | 22.7%    |        |          |                                                        |       |        |       |        |       |        |        |        |
| SGO_1112 | 11 | 51.8%    | 5    | 32.7%    | 8    | 37.3%    |        |          | fruB; 1-phosphofructokinase                            |       |        |       |        |       |        |        |        |
|          | 14 | 60.4%    | 4    | 22.4%    | 11   | 59.4%    | 3      | 14.9%    |                                                        |       |        |       |        |       |        |        |        |

- Show detected proteins only  
 Show all proteins

Proteins found:  
1179

Filter by category:

ABC Transporter

Dot Plots Dot Plots



Summary Table

SgFn vs Sg

SgPg vs Sg

SgPgFn vs Sg

SgPg vs SgFn

SgPgFn vs SgFn

SgPgFn vs SgPg

Coverage

Sg

SgFn

SgPg

SgPgFn

Description

Sg

SgFn

SgPg

SgPgFn

Protein

n Coverage

n Coverage

n Coverage

n Coverage

Rep I Rep II

Rep I Rep II

Rep I Rep II

Rep I Rep II

| Protein  | Sg |          | SgFn |          | SgPg |          | SgPgFn |          | Description                                                | Sg    |        | SgFn  |        | SgPg  |        | SgPgFn |        |
|----------|----|----------|------|----------|------|----------|--------|----------|------------------------------------------------------------|-------|--------|-------|--------|-------|--------|--------|--------|
|          | n  | Coverage | n    | Coverage | n    | Coverage | n      | Coverage |                                                            | Rep I | Rep II | Rep I | Rep II | Rep I | Rep II | Rep I  | Rep II |
| SGO_1113 | 21 | 34.8%    | 9    | 16.8%    | 13   | 27.6%    | 8      | 18.7%    | fruA; PTS system, fructose specific IIABC components       |       |        |       |        |       |        |        |        |
|          | 26 | 41.3%    | 5    | 10.7%    | 14   | 27.4%    | 11     | 24.2%    |                                                            |       |        |       |        |       |        |        |        |
| SGO_1114 | 7  | 42.7%    | 5    | 42.7%    | 7    | 51.6%    | 4      | 31.5%    | Protein of unknown function (DUF1149) superfamily          |       |        |       |        |       |        |        |        |
|          | 6  | 36.3%    | 3    | 29.8%    | 5    | 31.5%    | 3      | 25.0%    |                                                            |       |        |       |        |       |        |        |        |
| SGO_1115 |    |          |      |          | 3    | 13.4%    |        |          | DegV family protein                                        |       |        |       |        |       |        |        |        |
|          | 3  | 12.0%    | 3    | 13.4%    | 3    | 12.0%    |        |          |                                                            |       |        |       |        |       |        |        |        |
| SGO_1116 | 6  | 43.1%    | 7    | 39.6%    | 7    | 43.5%    | 6      | 43.1%    | dapB; dihydrodipicolinate reductase                        |       |        |       |        |       |        |        |        |
|          | 6  | 43.5%    | 6    | 37.6%    | 7    | 43.5%    | 6      | 43.1%    |                                                            |       |        |       |        |       |        |        |        |
| SGO_1117 |    |          | 7    | 30.8%    | 4    | 9.8%     |        |          | pcnA; polynucleotide adenylyltransferase                   |       |        |       |        |       |        |        |        |
|          |    |          | 4    | 17.3%    | 4    | 15.8%    |        |          |                                                            |       |        |       |        |       |        |        |        |
| SGO_1118 |    |          | 5    | 12.4%    | 4    | 8.9%     |        |          | ABC transporter, ATP-binding protein SP1553                |       |        |       |        |       |        |        |        |
|          | 6  | 12.7%    | 8    | 14.8%    | 5    | 9.7%     |        |          |                                                            |       |        |       |        |       |        |        |        |
| SGO_1119 | 4  | 9.4%     |      |          |      |          |        |          | Abi-alpha protein, putative                                |       |        |       |        |       |        |        |        |
|          | 3  | 5.8%     |      |          |      |          |        |          |                                                            |       |        |       |        |       |        |        |        |
| SGO_1120 | 21 | 50.4%    | 20   | 49.0%    | 21   | 54.4%    | 15     | 46.3%    | guaA; GMP synthase                                         |       |        |       |        |       |        |        |        |
|          | 25 | 57.3%    | 25   | 64.3%    | 24   | 54.1%    | 17     | 45.8%    |                                                            |       |        |       |        |       |        |        |        |
| SGO_1121 |    |          |      |          |      |          |        |          | transcription regulator, GntR family                       |       |        |       |        |       |        |        |        |
|          | 5  | 16.8%    |      |          | 3    | 22.4%    |        |          |                                                            |       |        |       |        |       |        |        |        |
| SGO_1123 | 11 | 28.4%    | 16   | 47.1%    | 20   | 54.4%    | 13     | 41.2%    | ffh; signal recognition particle protein                   |       |        |       |        |       |        |        |        |
|          | 14 | 38.7%    | 14   | 43.3%    | 21   | 54.4%    | 14     | 44.7%    |                                                            |       |        |       |        |       |        |        |        |
| SGO_1124 | 3  | 18.0%    |      |          |      |          |        |          | cell surface hydrolase                                     |       |        |       |        |       |        |        |        |
|          | 4  | 22.5%    |      |          |      |          |        |          |                                                            |       |        |       |        |       |        |        |        |
| SGO_1128 |    |          |      |          |      |          |        |          | bacteriocin-associated integral membrane protein subfamily |       |        |       |        |       |        |        |        |
|          | 6  | 10.3%    |      |          |      |          |        |          |                                                            |       |        |       |        |       |        |        |        |

- Show detected proteins only  
 Show all proteins

Proteins found:  
1179

Filter by category:

ABC Transporter

Dot Plots Dot Plots

Summary Table

SgFn vs Sg

SgPg vs Sg

SgPgFn vs Sg

SgPg vs SgFn

SgPgFn vs SgFn

SgPgFn vs SgPg

Coverage

Sg

SgFn

SgPg

SgPgFn

Description

Sg

SgFn

SgPg

SgPgFn

| Protein  | Sg |          | SgFn |          | SgPg |          | SgPgFn |          | Description                                                | Sg    |        | SgFn  |        | SgPg  |        | SgPgFn |        |
|----------|----|----------|------|----------|------|----------|--------|----------|------------------------------------------------------------|-------|--------|-------|--------|-------|--------|--------|--------|
|          | n  | Coverage | n    | Coverage | n    | Coverage | n      | Coverage |                                                            | Rep I | Rep II | Rep I | Rep II | Rep I | Rep II | Rep I  | Rep II |
| SGO_1129 | 9  | 33.1%    | 6    | 14.9%    | 8    | 35.3%    | 7      | 26.4%    | lplA; lipoate protein ligase A                             |       |        |       |        |       |        |        |        |
|          | 11 | 35.6%    | 4    | 14.9%    | 8    | 33.7%    | 6      | 26.4%    |                                                            |       |        |       |        |       |        |        |        |
| SGO_1130 | 21 | 39.7%    | 4    | 8.1%     | 14   | 28.6%    | 13     | 30.0%    | dihydrolipoamide dehydrogenase                             |       |        |       |        |       |        |        |        |
|          | 20 | 42.0%    | 5    | 14.8%    | 17   | 35.4%    | 11     | 24.2%    |                                                            |       |        |       |        |       |        |        |        |
| SGO_1131 | 10 | 34.9%    | 4    | 18.4%    | 8    | 32.3%    | 4      | 19.3%    | sucB; dihydrolipoamide S-acetyltransferase                 |       |        |       |        |       |        |        |        |
|          | 16 | 40.3%    |      |          | 9    | 35.4%    | 5      | 23.9%    |                                                            |       |        |       |        |       |        |        |        |
| SGO_1132 | 5  | 22.4%    |      |          | 6    | 26.1%    | 3      | 17.6%    | acetoin dehydrogenase                                      |       |        |       |        |       |        |        |        |
|          | 7  | 28.5%    |      |          | 5    | 26.1%    |        |          |                                                            |       |        |       |        |       |        |        |        |
| SGO_1133 | 7  | 30.1%    |      |          | 6    | 26.7%    | 6      | 29.2%    | acoA; acetoin dehydrogenase                                |       |        |       |        |       |        |        |        |
|          | 8  | 33.2%    | 5    | 15.8%    | 7    | 30.7%    | 4      | 20.5%    |                                                            |       |        |       |        |       |        |        |        |
| SGO_1134 | 6  | 16.5%    | 7    | 20.9%    | 4    | 14.4%    |        |          | hypothetical protein SGO_1134                              |       |        |       |        |       |        |        |        |
|          | 6  | 22.9%    | 12   | 37.6%    |      |          | 4      | 12.4%    |                                                            |       |        |       |        |       |        |        |        |
| SGO_1139 | 9  | 58.9%    | 10   | 55.8%    | 13   | 73.1%    | 7      | 49.2%    | GTP-binding protein                                        |       |        |       |        |       |        |        |        |
|          | 12 | 64.5%    | 8    | 49.7%    | 14   | 78.7%    | 8      | 43.7%    |                                                            |       |        |       |        |       |        |        |        |
| SGO_1140 | 15 | 43.8%    | 15   | 46.9%    | 20   | 67.5%    | 12     | 35.9%    | clpX; ATP-dependent Clp protease, ATP-binding subunit ClpX |       |        |       |        |       |        |        |        |
|          | 20 | 49.1%    | 16   | 46.0%    | 20   | 67.2%    | 14     | 45.7%    |                                                            |       |        |       |        |       |        |        |        |
| SGO_1141 | 5  | 40.6%    | 4    | 36.5%    | 4    | 36.5%    | 3      | 23.5%    | folA; dihydrofolate reductase                              |       |        |       |        |       |        |        |        |
|          | 4  | 25.9%    | 7    | 53.5%    | 4    | 36.5%    |        |          |                                                            |       |        |       |        |       |        |        |        |
| SGO_1143 | 3  | 16.5%    | 3    | 17.2%    | 4    | 21.1%    | 3      | 16.5%    | thyA; thymidylate synthase                                 |       |        |       |        |       |        |        |        |
|          | 4  | 21.1%    | 4    | 23.7%    | 4    | 19.7%    |        |          |                                                            |       |        |       |        |       |        |        |        |
| SGO_1144 | 14 | 45.5%    | 19   | 79.6%    | 19   | 72.1%    | 13     | 58.6%    | glcK; glucokinase                                          |       |        |       |        |       |        |        |        |
|          | 19 | 63.9%    | 19   | 77.1%    | 18   | 69.0%    | 13     | 64.3%    |                                                            |       |        |       |        |       |        |        |        |
| SGO_1145 | 4  | 21.7%    |      |          |      |          |        |          | cell surface hydrolase                                     |       |        |       |        |       |        |        |        |
|          | 4  | 17.8%    |      |          |      |          |        |          |                                                            |       |        |       |        |       |        |        |        |

 Show detected proteins only Show all proteins Filter by category:

ABC Transporter

Proteins found:

1179

Dot Plots Dot Plots

Summary Table SgFn vs Sg SgPg vs Sg SgPgFn vs Sg SgPg vs SgFn SgPgFn vs SgFn SgPgFn vs SgPg Coverage

| Protein  | Sg |          | SgFn |          | SgPg |          | SgPgFn |          | Description                                   | Sg    |        | SgFn  |        | SgPg  |        | SgPgFn |        |
|----------|----|----------|------|----------|------|----------|--------|----------|-----------------------------------------------|-------|--------|-------|--------|-------|--------|--------|--------|
|          | n  | Coverage | n    | Coverage | n    | Coverage | n      | Coverage |                                               | Rep I | Rep II | Rep I | Rep II | Rep I | Rep II | Rep I  | Rep II |
| SGO_1148 | 46 | 28.8%    | 11   | 9.0%     |      |          |        |          | cshB; surface-associated protein CshB         |       |        |       |        |       |        |        |        |
|          | 48 | 29.5%    | 11   | 8.8%     |      |          |        |          |                                               |       |        |       |        |       |        |        |        |
| SGO_1149 | 5  | 36.0%    |      |          |      |          |        |          | Pneumococcal vaccine antigen A-like protein   |       |        |       |        |       |        |        |        |
|          | 6  | 42.0%    |      |          |      |          |        |          |                                               |       |        |       |        |       |        |        |        |
| SGO_1150 |    |          | 8    | 32.1%    | 8    | 37.0%    |        |          | hypothetical protein SGO_1150                 |       |        |       |        |       |        |        |        |
|          | 9  | 37.3%    | 5    | 22.8%    | 9    | 38.0%    | 3      | 12.7%    |                                               |       |        |       |        |       |        |        |        |
| SGO_1151 | 15 | 45.0%    | 25   | 68.6%    | 19   | 55.0%    | 16     | 49.8%    | glyA; serine hydroxymethyltransferase         |       |        |       |        |       |        |        |        |
|          | 16 | 46.0%    | 22   | 67.4%    | 22   | 58.3%    | 14     | 44.0%    |                                               |       |        |       |        |       |        |        |        |
| SGO_1154 | 10 | 36.2%    | 10   | 46.2%    | 11   | 37.6%    | 11     | 38.2%    | prfA; peptide chain release factor 1          |       |        |       |        |       |        |        |        |
|          | 12 | 44.3%    | 8    | 33.1%    | 13   | 46.5%    | 10     | 38.4%    |                                               |       |        |       |        |       |        |        |        |
| SGO_1155 | 7  | 41.9%    | 4    | 29.8%    | 5    | 24.1%    |        |          | tdk; thymidine kinase                         |       |        |       |        |       |        |        |        |
|          | 8  | 46.1%    | 4    | 28.8%    | 5    | 26.2%    | 4      | 16.2%    |                                               |       |        |       |        |       |        |        |        |
| SGO_1159 |    |          | 3    | 12.2%    | 4    | 21.1%    |        |          | guaC; guanosine monophosphate reductase       |       |        |       |        |       |        |        |        |
|          | 3  | 18.3%    | 3    | 12.2%    | 5    | 30.9%    |        |          |                                               |       |        |       |        |       |        |        |        |
| SGO_1163 |    |          |      |          |      |          | 3      | 7.8%     | Iron permease FTR1 family                     |       |        |       |        |       |        |        |        |
| SGO_1166 | 3  | 9.1%     |      |          |      |          |        |          | voltage-gated chloride channel family protein |       |        |       |        |       |        |        |        |
|          | 3  | 9.9%     |      |          |      |          |        |          |                                               |       |        |       |        |       |        |        |        |
| SGO_1167 | 13 | 31.7%    | 8    | 27.9%    | 17   | 48.9%    | 15     | 42.4%    | nox; NADH oxidase                             |       |        |       |        |       |        |        |        |
|          | 18 | 39.7%    | 7    | 21.6%    | 16   | 43.2%    | 14     | 39.7%    |                                               |       |        |       |        |       |        |        |        |
| SGO_1169 | 12 | 53.7%    | 4    | 29.9%    | 12   | 53.2%    | 6      | 35.3%    | NADPH-dependent FMN reductase                 |       |        |       |        |       |        |        |        |
|          | 11 | 48.8%    | 4    | 29.9%    | 11   | 46.8%    | 7      | 40.8%    |                                               |       |        |       |        |       |        |        |        |
| SGO_1170 | 13 | 42.8%    | 6    | 21.5%    | 15   | 45.4%    | 8      | 30.4%    | NADPH-dependent FMN reductase                 |       |        |       |        |       |        |        |        |
|          | 15 | 43.5%    | 8    | 31.4%    | 13   | 42.8%    | 10     | 35.5%    |                                               |       |        |       |        |       |        |        |        |

Show detected proteins only  
 Show all proteins  
 Filter by category:

Proteins found: 1179

Dot Plots Dot Plots

Summary Table

SgFn vs Sg

SgPg vs Sg

SgPgFn vs Sg

SgPg vs SgFn

SgPgFn vs SgFn

SgPgFn vs SgPg

Coverage

| Protein  | Sg |          | SgFn |          | SgPg |          | SgPgFn |          | Description                                         | Sg    |        | SgFn  |        | SgPg  |        | SgPgFn |        |
|----------|----|----------|------|----------|------|----------|--------|----------|-----------------------------------------------------|-------|--------|-------|--------|-------|--------|--------|--------|
|          | n  | Coverage | n    | Coverage | n    | Coverage | n      | Coverage |                                                     | Rep I | Rep II | Rep I | Rep II | Rep I | Rep II | Rep I  | Rep II |
| SGO_1171 | 12 | 76.9%    | 4    | 36.3%    | 5    | 46.3%    |        |          | thioredoxin family protein                          |       |        |       |        |       |        |        |        |
|          | 14 | 76.9%    | 4    | 39.4%    | 4    | 35.0%    |        |          |                                                     |       |        |       |        |       |        |        |        |
| SGO_1174 | 3  | 7.1%     |      |          |      |          |        |          | histidine kinase                                    |       |        |       |        |       |        |        |        |
|          | 6  | 12.0%    |      |          |      |          |        |          |                                                     |       |        |       |        |       |        |        |        |
| SGO_1176 |    |          |      |          |      |          |        |          | peptide methionine sulfoxide reductase-like protein |       |        |       |        |       |        |        |        |
|          | 3  | 11.0%    |      |          |      |          |        |          |                                                     |       |        |       |        |       |        |        |        |
| SGO_1182 | 3  | 8.9%     |      |          |      |          |        |          | LPXTG cell wall surface protein                     |       |        |       |        |       |        |        |        |
| SGO_1184 | 4  | 23.2%    |      |          |      |          |        |          | GdmH                                                |       |        |       |        |       |        |        |        |
|          | 4  | 19.4%    |      |          |      |          |        |          |                                                     |       |        |       |        |       |        |        |        |
| SGO_1185 | 4  | 21.7%    | 3    | 26.1%    | 5    | 27.7%    | 3      | 15.8%    | acetyltransferase, GNAT family                      |       |        |       |        |       |        |        |        |
|          | 4  | 21.7%    |      |          | 4    | 21.7%    | 3      | 16.3%    |                                                     |       |        |       |        |       |        |        |        |
| SGO_1186 | 12 | 30.5%    |      |          |      |          |        |          | ABC transporter, permease/ATP-binding protein       |       |        |       |        |       |        |        |        |
|          | 14 | 34.6%    |      |          |      |          |        |          |                                                     |       |        |       |        |       |        |        |        |
| SGO_1187 | 13 | 27.2%    |      |          |      |          |        |          | ABC transporter, permease/ATP-binding protein       |       |        |       |        |       |        |        |        |
|          | 16 | 34.4%    |      |          |      |          |        |          |                                                     |       |        |       |        |       |        |        |        |
| SGO_1189 | 8  | 45.8%    | 6    | 50.3%    | 4    | 28.8%    | 3      | 22.2%    | lipoprotein, putative                               |       |        |       |        |       |        |        |        |
|          | 12 | 60.8%    | 3    | 20.3%    | 5    | 30.1%    | 3      | 22.2%    |                                                     |       |        |       |        |       |        |        |        |
| SGO_1191 | 12 | 93.4%    | 13   | 82.8%    | 15   | 89.3%    | 13     | 86.9%    | rpL; ribosomal protein L7/L12                       |       |        |       |        |       |        |        |        |
|          | 11 | 82.8%    | 10   | 82.8%    | 13   | 89.3%    | 12     | 82.8%    |                                                     |       |        |       |        |       |        |        |        |
| SGO_1192 | 9  | 53.6%    | 5    | 47.0%    | 12   | 75.9%    | 10     | 68.7%    | BL5; 50S ribosomal protein L10                      |       |        |       |        |       |        |        |        |
|          | 11 | 64.5%    | 8    | 60.8%    | 13   | 72.9%    | 10     | 63.3%    |                                                     |       |        |       |        |       |        |        |        |
| SGO_1193 | 9  | 31.1%    | 12   | 51.4%    | 12   | 48.2%    | 4      | 16.9%    | gid; Glucose inhibited division protein A           |       |        |       |        |       |        |        |        |
|          | 10 | 38.1%    | 14   | 62.4%    | 14   | 62.2%    | 4      | 15.8%    |                                                     |       |        |       |        |       |        |        |        |

- Show detected proteins only  
 Show all proteins

Proteins found:  
1179

Filter by category:

ABC Transporter

Dot Plots Dot Plots

Summary Table

SgFn vs Sg

SgPg vs Sg

SgPgFn vs Sg

SgPg vs SgFn

SgPgFn vs SgFn

SgPgFn vs SgPg

Coverage

Sg

SgFn

SgPg

SgPgFn

Description

Sg

SgFn

SgPg

SgPgFn

Protein

n Coverage

n Coverage

n Coverage

n Coverage

Rep I Rep II

Rep I Rep II

Rep I Rep II

Rep I Rep II

SGO\_1196

3

23.3%

3

17.2%

satD; SatD-like protein

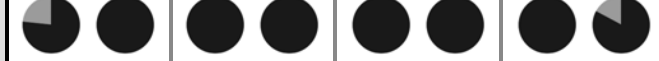

SGO\_1197

29

49.9%

9

21.2%

14

30.0%

10

21.1%

topA; DNA topoisomerase I

33

52.2%

9

23.4%

18

35.7%

10

19.5%

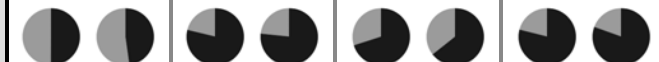

SGO\_1198

14

50.4%

13

51.8%

12

46.1%

DNA processing Smf protein

16

57.5%

10

44.3%

10

45.7%

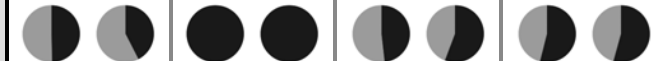

SGO\_1199

3

26.0%

3

26.0%

acetyltransferase, CysE/LacA/LpxA/NodL family

5

34.4%

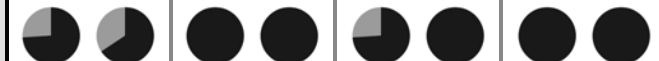

SGO\_1202

6

26.9%

7

33.9%

8

37.1%

GTP-binding protein

9

34.6%

5

19.8%

10

44.5%

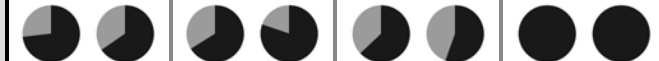

SGO\_1203

4

36.6%

7

77.7%

6

63.4%

4

51.8%

anaerobic ribonucleotide reductase

6

67.0%

9

79.5%

8

78.6%

4

51.8%

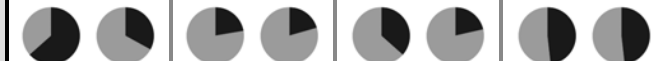

SGO\_1205

4

17.0%

7

24.4%

6

24.8%

4

15.8%

dapA; dihydrodipicolinate synthase

5

20.3%

3

13.8%

6

26.7%

4

19.6%

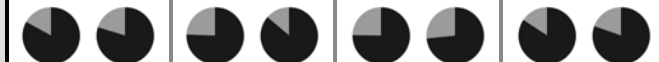

SGO\_1206

9

41.3%

9

36.6%

11

48.6%

8

36.9%

asd; aspartate-semialdehyde dehydrogenase

12

49.4%

10

46.4%

10

41.3%

7

29.3%

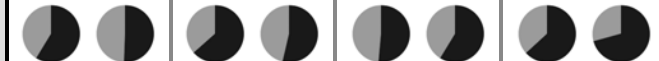

SGO\_1208

3

25.8%

Hypothetical FAD-dependent oxidoreductase, putative

5

36.8%

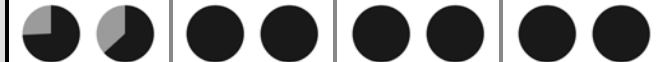

SGO\_1210

6

13.3%

11

25.7%

6

13.3%

3

9.2%

fhs-1; formate--tetrahydrofolate ligase

6

14.4%

9

25.4%

4

8.8%

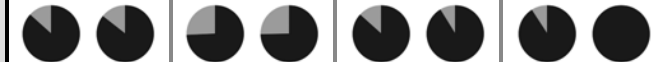

SGO\_1213

7

55.2%

5

49.7%

4

37.7%

coaC; phosphopantothienoylcysteine decarboxylase

9

62.8%

3

25.7%

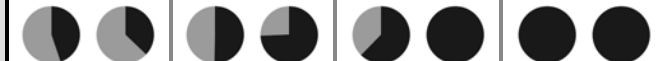

SGO\_1215

30

71.9%

28

74.3%

31

78.0%

26

69.8%

manB; phosphomannomutase

32

75.0%

32

78.3%

35

79.5%

26

66.1%

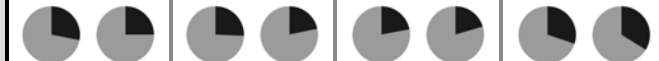 Show detected proteins only Show all proteins

Proteins found:

1179

 Filter by category:

ABC Transporter

Dot Plots Dot Plots

Summary Table

SgFn vs Sg

SgPg vs Sg

SgPgFn vs Sg

SgPg vs SgFn

SgPgFn vs SgFn

SgPgFn vs SgPg

Coverage

| Protein  | Sg |          | SgFn |          | SgPg |          | SgPgFn |          | Description                                           | Sg    |        | SgFn  |        | SgPg  |        | SgPgFn |        |
|----------|----|----------|------|----------|------|----------|--------|----------|-------------------------------------------------------|-------|--------|-------|--------|-------|--------|--------|--------|
|          | n  | Coverage | n    | Coverage | n    | Coverage | n      | Coverage |                                                       | Rep I | Rep II | Rep I | Rep II | Rep I | Rep II | Rep I  | Rep II |
| SGO_1216 | 6  | 62.6%    | 7    | 73.9%    | 7    | 60.9%    | 7      | 68.7%    | bta; Possible bacteriocin transport accessory protein |       |        |       |        |       |        |        |        |
|          | 5  | 53.0%    | 5    | 53.0%    | 8    | 78.3%    | 7      | 60.9%    |                                                       |       |        |       |        |       |        |        |        |
| SGO_1219 | 9  | 42.5%    | 11   | 52.9%    | 10   | 45.5%    | 8      | 33.8%    | pta; phosphate acetyltransferase                      |       |        |       |        |       |        |        |        |
|          | 11 | 45.8%    | 11   | 50.8%    | 11   | 52.9%    | 7      | 30.8%    |                                                       |       |        |       |        |       |        |        |        |
| SGO_1221 | 12 | 57.3%    | 3    | 14.6%    |      |          |        |          | ppnK; Probable inorganic polyphosphate/ATP-NAD kinase |       |        |       |        |       |        |        |        |
|          | 17 | 70.4%    | 9    | 42.3%    |      |          |        |          |                                                       |       |        |       |        |       |        |        |        |
| SGO_1222 | 4  | 21.3%    |      |          |      |          |        |          | GTP pyrophosphokinase-like protein                    |       |        |       |        |       |        |        |        |
|          | 6  | 33.5%    | 3    | 18.6%    | 4    | 26.2%    |        |          |                                                       |       |        |       |        |       |        |        |        |
| SGO_1224 | 17 | 58.4%    | 13   | 51.6%    | 16   | 54.0%    | 11     | 39.8%    | Ribose-phosphate pyrophosphokinase 2                  |       |        |       |        |       |        |        |        |
|          | 17 | 59.6%    | 10   | 41.3%    | 14   | 52.2%    | 14     | 51.6%    |                                                       |       |        |       |        |       |        |        |        |
| SGO_1225 | 6  | 24.3%    | 6    | 27.2%    | 7    | 34.1%    | 4      | 20.0%    | pyridoxal-phosphate dependent aminotransferase        |       |        |       |        |       |        |        |        |
|          | 6  | 24.5%    | 5    | 21.1%    | 8    | 36.8%    | 7      | 33.9%    |                                                       |       |        |       |        |       |        |        |        |
| SGO_1226 | 6  | 50.4%    | 5    | 45.2%    | 5    | 45.2%    | 4      | 45.2%    | hypothetical protein SGO_1226                         |       |        |       |        |       |        |        |        |
|          | 5  | 45.2%    | 4    | 40.9%    | 5    | 45.2%    | 4      | 40.9%    |                                                       |       |        |       |        |       |        |        |        |
| SGO_1228 | 6  | 34.4%    | 5    | 21.4%    | 6    | 27.9%    |        |          | DNA-binding protein BH0551                            |       |        |       |        |       |        |        |        |
|          | 7  | 36.3%    | 5    | 30.7%    | 6    | 35.3%    |        |          |                                                       |       |        |       |        |       |        |        |        |
| SGO_1230 | 9  | 46.6%    |      |          | 4    | 23.9%    |        |          | srtA; sortase A                                       |       |        |       |        |       |        |        |        |
|          | 9  | 34.7%    |      |          | 3    | 22.7%    |        |          |                                                       |       |        |       |        |       |        |        |        |
| SGO_1231 | 28 | 40.0%    | 20   | 37.0%    | 17   | 26.9%    | 11     | 14.0%    | gyrA; DNA gyrase, A subunit                           |       |        |       |        |       |        |        |        |
|          | 34 | 44.3%    | 12   | 19.6%    | 23   | 34.0%    | 10     | 14.9%    |                                                       |       |        |       |        |       |        |        |        |
| SGO_1232 | 12 | 51.5%    | 18   | 59.8%    | 20   | 58.5%    | 14     | 55.2%    | L-lactate dehydrogenase                               |       |        |       |        |       |        |        |        |
|          | 12 | 49.7%    | 15   | 51.5%    | 18   | 57.6%    | 15     | 55.2%    |                                                       |       |        |       |        |       |        |        |        |
| SGO_1234 | 23 | 56.6%    | 31   | 69.3%    | 28   | 67.3%    | 26     | 63.6%    | rpsA; 30S ribosomal protein S1                        |       |        |       |        |       |        |        |        |
|          | 28 | 57.9%    | 24   | 60.3%    | 26   | 58.1%    | 27     | 62.6%    |                                                       |       |        |       |        |       |        |        |        |

Description

| Protein  | Sg |          | SgFn |          | SgPg |          | SgPgFn |          | Description                                           | Sg    |        | SgFn  |        | SgPg  |        | SgPgFn |        |
|----------|----|----------|------|----------|------|----------|--------|----------|-------------------------------------------------------|-------|--------|-------|--------|-------|--------|--------|--------|
|          | n  | Coverage | n    | Coverage | n    | Coverage | n      | Coverage |                                                       | Rep I | Rep II | Rep I | Rep II | Rep I | Rep II | Rep I  | Rep II |
| SGO_1216 | 6  | 62.6%    | 7    | 73.9%    | 7    | 60.9%    | 7      | 68.7%    | bta; Possible bacteriocin transport accessory protein |       |        |       |        |       |        |        |        |
|          | 5  | 53.0%    | 5    | 53.0%    | 8    | 78.3%    | 7      | 60.9%    |                                                       |       |        |       |        |       |        |        |        |
| SGO_1219 | 9  | 42.5%    | 11   | 52.9%    | 10   | 45.5%    | 8      | 33.8%    | pta; phosphate acetyltransferase                      |       |        |       |        |       |        |        |        |
|          | 11 | 45.8%    | 11   | 50.8%    | 11   | 52.9%    | 7      | 30.8%    |                                                       |       |        |       |        |       |        |        |        |
| SGO_1221 | 12 | 57.3%    | 3    | 14.6%    |      |          |        |          | ppnK; Probable inorganic polyphosphate/ATP-NAD kinase |       |        |       |        |       |        |        |        |
|          | 17 | 70.4%    | 9    | 42.3%    |      |          |        |          |                                                       |       |        |       |        |       |        |        |        |
| SGO_1222 | 4  | 21.3%    |      |          |      |          |        |          | GTP pyrophosphokinase-like protein                    |       |        |       |        |       |        |        |        |
|          | 6  | 33.5%    | 3    | 18.6%    | 4    | 26.2%    |        |          |                                                       |       |        |       |        |       |        |        |        |
| SGO_1224 | 17 | 58.4%    | 13   | 51.6%    | 16   | 54.0%    | 11     | 39.8%    | Ribose-phosphate pyrophosphokinase 2                  |       |        |       |        |       |        |        |        |
|          | 17 | 59.6%    | 10   | 41.3%    | 14   | 52.2%    | 14     | 51.6%    |                                                       |       |        |       |        |       |        |        |        |
| SGO_1225 | 6  | 24.3%    | 6    | 27.2%    | 7    | 34.1%    | 4      | 20.0%    | pyridoxal-phosphate dependent aminotransferase        |       |        |       |        |       |        |        |        |
|          | 6  | 24.5%    | 5    | 21.1%    | 8    | 36.8%    | 7      | 33.9%    |                                                       |       |        |       |        |       |        |        |        |
| SGO_1226 | 6  | 50.4%    | 5    | 45.2%    | 5    | 45.2%    | 4      | 45.2%    | hypothetical protein SGO_1226                         |       |        |       |        |       |        |        |        |
|          | 5  | 45.2%    | 4    | 40.9%    | 5    | 45.2%    | 4      | 40.9%    |                                                       |       |        |       |        |       |        |        |        |
| SGO_1228 | 6  | 34.4%    | 5    | 21.4%    | 6    | 27.9%    |        |          | DNA-binding protein BH0551                            |       |        |       |        |       |        |        |        |
|          | 7  | 36.3%    | 5    | 30.7%    | 6    | 35.3%    |        |          |                                                       |       |        |       |        |       |        |        |        |
| SGO_1230 | 9  | 46.6%    |      |          | 4    | 23.9%    |        |          | srtA; sortase A                                       |       |        |       |        |       |        |        |        |
|          | 9  | 34.7%    |      |          | 3    | 22.7%    |        |          |                                                       |       |        |       |        |       |        |        |        |
| SGO_1231 | 28 | 40.0%    | 20   | 37.0%    | 17   | 26.9%    | 11     | 14.0%    | gyrA; DNA gyrase, A subunit                           |       |        |       |        |       |        |        |        |
|          | 34 | 44.3%    | 12   | 19.6%    | 23   | 34.0%    | 10     | 14.9%    |                                                       |       |        |       |        |       |        |        |        |
| SGO_1232 | 12 | 51.5%    | 18   | 59.8%    | 20   | 58.5%    | 14     | 55.2%    | L-lactate dehydrogenase                               |       |        |       |        |       |        |        |        |
|          | 12 | 49.7%    | 15   | 51.5%    | 18   | 57.6%    | 15     | 55.2%    |                                                       |       |        |       |        |       |        |        |        |
| SGO_1234 | 23 | 56.6%    | 31   | 69.3%    | 28   | 67.3%    | 26     | 63.6%    | rpsA; 30S ribosomal protein S1                        |       |        |       |        |       |        |        |        |
|          | 28 | 57.9%    | 24   | 60.3%    | 26   | 58.1%    | 27     | 62.6%    |                                                       |       |        |       |        |       |        |        |        |

 Show detected proteins only Show all proteins Filter by category:

ABC Transporter

Proteins found:  
1179

Dot Plots Dot Plots

Summary Table

SgFn vs Sg

SgPg vs Sg

SgPgFn vs Sg

SgPg vs SgFn

SgPgFn vs SgFn

SgPgFn vs SgPg

Coverage

Sg

SgFn

SgPg

SgPgFn

Description

Sg

SgFn

SgPg

SgPgFn

| Protein  | Sg |          | SgFn |          | SgPg |          | SgPgFn |          | Description                                      | Sg    |        | SgFn  |        | SgPg  |        | SgPgFn |        |
|----------|----|----------|------|----------|------|----------|--------|----------|--------------------------------------------------|-------|--------|-------|--------|-------|--------|--------|--------|
|          | n  | Coverage | n    | Coverage | n    | Coverage | n      | Coverage |                                                  | Rep I | Rep II | Rep I | Rep II | Rep I | Rep II | Rep I  | Rep II |
| SGO_1237 | 5  | 82.9%    |      |          | 6    | 82.9%    | 4      | 44.7%    | hypothetical protein SGO_1237                    |       |        |       |        |       |        |        |        |
|          | 6  | 82.9%    |      |          | 6    | 82.9%    | 5      | 82.9%    |                                                  |       |        |       |        |       |        |        |        |
| SGO_1238 | 7  | 30.3%    | 11   | 47.4%    | 9    | 37.6%    | 7      | 30.0%    | ilvE; branched-chain amino acid aminotransferase |       |        |       |        |       |        |        |        |
|          | 8  | 35.3%    | 10   | 40.9%    | 11   | 47.1%    | 8      | 32.9%    |                                                  |       |        |       |        |       |        |        |        |
| SGO_1239 | 18 | 26.6%    | 3    | 6.4%     | 11   | 19.7%    | 3      | 4.5%     | parC; DNA topoisomerase IV, A subunit            |       |        |       |        |       |        |        |        |
|          | 19 | 29.4%    | 7    | 12.7%    | 9    | 14.3%    | 3      | 5.6%     |                                                  |       |        |       |        |       |        |        |        |
| SGO_1241 | 4  | 18.4%    |      |          |      |          |        |          | aminoglycoside adenylyltransferase               |       |        |       |        |       |        |        |        |
|          | 3  | 15.9%    |      |          |      |          |        |          |                                                  |       |        |       |        |       |        |        |        |
| SGO_1242 | 6  | 42.2%    |      |          |      |          | 3      | 36.2%    | lipoprotein, putative                            |       |        |       |        |       |        |        |        |
|          | 8  | 49.1%    |      |          | 3    | 36.2%    |        |          |                                                  |       |        |       |        |       |        |        |        |
| SGO_1244 | 9  | 22.3%    |      |          | 5    | 18.9%    |        |          | hypothetical protein SGO_1244                    |       |        |       |        |       |        |        |        |
|          | 5  | 15.5%    |      |          | 5    | 17.0%    |        |          |                                                  |       |        |       |        |       |        |        |        |
| SGO_1245 | 12 | 22.7%    |      |          | 6    | 12.3%    |        |          | parE; DNA topoisomerase IV, B subunit            |       |        |       |        |       |        |        |        |
|          | 12 | 23.1%    |      |          | 6    | 12.8%    |        |          |                                                  |       |        |       |        |       |        |        |        |
| SGO_1246 | 3  | 13.6%    |      |          |      |          |        |          | hypothetical protein SGO_1246                    |       |        |       |        |       |        |        |        |
|          | 3  | 13.6%    |      |          |      |          |        |          |                                                  |       |        |       |        |       |        |        |        |
| SGO_1247 | 36 | 55.2%    | 25   | 40.7%    |      |          |        |          | 5'-nucleotidase family protein                   |       |        |       |        |       |        |        |        |
|          | 41 | 61.8%    | 21   | 49.6%    |      |          |        |          |                                                  |       |        |       |        |       |        |        |        |
| SGO_1248 | 5  | 13.5%    | 9    | 32.2%    | 7    | 16.6%    | 4      | 12.6%    | pyrC; dihydroorotase                             |       |        |       |        |       |        |        |        |
|          | 7  | 18.0%    | 8    | 24.6%    | 7    | 18.2%    | 4      | 13.7%    |                                                  |       |        |       |        |       |        |        |        |
| SGO_1250 | 5  | 38.7%    | 3    | 21.7%    |      |          |        |          | ung; uracil-DNA glycosylase                      |       |        |       |        |       |        |        |        |
|          | 5  | 35.9%    | 4    | 33.2%    |      |          |        |          |                                                  |       |        |       |        |       |        |        |        |
| SGO_1251 | 3  | 16.4%    |      |          |      |          |        |          | hypothetical protein SGO_1251                    |       |        |       |        |       |        |        |        |
|          | 3  | 16.4%    |      |          |      |          |        |          |                                                  |       |        |       |        |       |        |        |        |

- Show detected proteins only  
 Show all proteins

Proteins found:  
1179

Filter by category:

ABC Transporter

Dot Plots Dot Plots

Summary Table

SgFn vs Sg

SgPg vs Sg

SgPgFn vs Sg

SgPg vs SgFn

SgPgFn vs SgFn

SgPgFn vs SgPg

Coverage

Sg

SgFn

SgPg

SgPgFn

Description

Sg

SgFn

SgPg

SgPgFn

Protein

n Coverage

n Coverage

n Coverage

n Coverage

Rep I Rep II

Rep I Rep II

Rep I Rep II

Rep I Rep II

| Protein  | Sg |          | SgFn |          | SgPg |          | SgPgFn |          | Description                                                      | Sg                                                                |        | SgFn  |        | SgPg  |        | SgPgFn |        |
|----------|----|----------|------|----------|------|----------|--------|----------|------------------------------------------------------------------|-------------------------------------------------------------------|--------|-------|--------|-------|--------|--------|--------|
|          | n  | Coverage | n    | Coverage | n    | Coverage | n      | Coverage |                                                                  | Rep I                                                             | Rep II | Rep I | Rep II | Rep I | Rep II | Rep I  | Rep II |
| SGO_1252 | 3  | 7.0%     |      |          |      |          |        |          | integral membrane protein, putative                              |                                                                   |        |       |        |       |        |        |        |
|          | 5  | 42.1%    | 8    | 55.0%    | 9    | 72.2%    | 4      | 38.8%    | pyrE; orotate phosphoribosyltransferase                          |                                                                   |        |       |        |       |        |        |        |
| SGO_1253 | 7  | 43.5%    | 5    | 43.5%    | 7    | 62.2%    | 4      | 37.8%    |                                                                  | pyrF; orotidine 5'-phosphate decarboxylase                        |        |       |        |       |        |        |        |
|          | 6  | 42.2%    |      |          |      |          |        |          | pyrd; dihydroorotate dehydrogenase B                             |                                                                   |        |       |        |       |        |        |        |
| SGO_1254 | 7  | 49.1%    |      |          | 4    | 33.9%    |        |          |                                                                  | probable transcriptional regulator (LysR family)                  |        |       |        |       |        |        |        |
|          | 4  | 31.1%    |      |          |      |          |        |          | NAD-dependent deacetylase (Regulatory protein SIR2-like protein) |                                                                   |        |       |        |       |        |        |        |
| SGO_1255 | 4  | 26.6%    |      |          | 4    | 30.8%    |        |          |                                                                  | deoD; purine nucleoside phosphorylase                             |        |       |        |       |        |        |        |
|          | 4  | 15.2%    | 8    | 31.1%    | 6    | 27.8%    |        |          | glutamine amidotransferase, class I                              |                                                                   |        |       |        |       |        |        |        |
| SGO_1257 | 7  | 22.5%    | 6    | 28.8%    | 8    | 30.1%    |        |          |                                                                  | purine nucleoside phosphorylase I, inosine and guanosine-specific |        |       |        |       |        |        |        |
|          | 3  | 16.5%    | 4    | 22.2%    |      |          |        |          | deoB; phosphopentomutase                                         |                                                                   |        |       |        |       |        |        |        |
| SGO_1258 | 5  | 25.5%    | 4    | 27.2%    |      |          |        |          |                                                                  | rpiA; ribose 5-phosphate isomerase                                |        |       |        |       |        |        |        |
|          | 10 | 53.2%    | 8    | 52.3%    | 10   | 61.6%    | 7      | 40.1%    | trmE; tRNA modification GTPase TrmE                              |                                                                   |        |       |        |       |        |        |        |
| SGO_1260 | 10 | 51.9%    | 9    | 58.2%    | 9    | 57.8%    | 7      | 40.1%    |                                                                  |                                                                   |        |       |        |       |        |        |        |
|          | 5  | 27.5%    |      |          |      |          |        |          |                                                                  |                                                                   |        |       |        |       |        |        |        |
| SGO_1261 | 9  | 45.7%    | 6    | 40.1%    | 6    | 40.5%    | 7      | 43.5%    |                                                                  |                                                                   |        |       |        |       |        |        |        |
|          | 7  | 43.5%    | 8    | 49.8%    | 6    | 40.5%    | 10     | 48.7%    |                                                                  |                                                                   |        |       |        |       |        |        |        |
| SGO_1263 | 22 | 65.0%    | 22   | 64.5%    | 23   | 66.7%    | 21     | 65.0%    |                                                                  |                                                                   |        |       |        |       |        |        |        |
|          | 22 | 65.3%    | 18   | 66.7%    | 23   | 66.7%    | 22     | 66.5%    |                                                                  |                                                                   |        |       |        |       |        |        |        |
| SGO_1264 | 9  | 59.1%    | 6    | 30.2%    | 6    | 41.8%    | 5      | 28.0%    |                                                                  |                                                                   |        |       |        |       |        |        |        |
|          | 9  | 59.1%    | 4    | 23.6%    | 9    | 59.1%    | 5      | 28.0%    |                                                                  |                                                                   |        |       |        |       |        |        |        |
| SGO_1265 | 12 | 33.0%    | 9    | 31.9%    | 8    | 19.7%    | 6      | 12.0%    |                                                                  |                                                                   |        |       |        |       |        |        |        |
|          | 10 | 26.7%    | 9    | 23.6%    | 11   | 27.1%    | 6      | 10.3%    |                                                                  |                                                                   |        |       |        |       |        |        |        |

 Show detected proteins only Show all proteins Filter by category:

ABC Transporter

Proteins found:

1179

Dot Plots Dot Plots



Summary Table

SgFn vs Sg

SgPg vs Sg

SgPgFn vs Sg

SgPg vs SgFn

SgPgFn vs SgFn

SgPgFn vs SgPg

Coverage

Sg

SgFn

SgPg

SgPgFn

Description

Sg

SgFn

SgPg

SgPgFn

Protein

n Coverage

n Coverage

n Coverage

n Coverage

Rep I Rep II

Rep I Rep II

Rep I Rep II

Rep I Rep II

| Protein  | Sg |          | SgFn |          | SgPg |          | SgPgFn |          | Description                                          | Sg    |        | SgFn  |        | SgPg  |        | SgPgFn |        |
|----------|----|----------|------|----------|------|----------|--------|----------|------------------------------------------------------|-------|--------|-------|--------|-------|--------|--------|--------|
|          | n  | Coverage | n    | Coverage | n    | Coverage | n      | Coverage |                                                      | Rep I | Rep II | Rep I | Rep II | Rep I | Rep II | Rep I  | Rep II |
| SGO_1267 | 6  | 48.5%    |      |          | 3    | 28.1%    |        |          | thioredoxin family protein                           |       |        |       |        |       |        |        |        |
|          | 7  | 54.5%    |      |          |      |          |        |          |                                                      |       |        |       |        |       |        |        |        |
| SGO_1273 | 15 | 51.1%    | 13   | 47.6%    | 17   | 56.8%    | 17     | 56.5%    | rpoD; RNA polymerase sigma factor                    |       |        |       |        |       |        |        |        |
|          | 15 | 51.9%    | 8    | 34.9%    | 17   | 57.6%    | 13     | 49.2%    |                                                      |       |        |       |        |       |        |        |        |
| SGO_1274 | 4  | 8.6%     |      |          | 5    | 12.6%    |        |          | dnaG; DNA primase                                    |       |        |       |        |       |        |        |        |
|          | 7  | 12.6%    |      |          | 7    | 17.2%    |        |          |                                                      |       |        |       |        |       |        |        |        |
| SGO_1276 | 4  | 36.2%    | 3    | 34.5%    | 5    | 36.2%    | 4      | 36.2%    | rpsU; ribosomal protein S21                          |       |        |       |        |       |        |        |        |
|          | 5  | 37.9%    | 4    | 37.9%    | 5    | 37.9%    | 4      | 36.2%    |                                                      |       |        |       |        |       |        |        |        |
| SGO_1280 | 4  | 20.4%    |      |          |      |          |        |          | putative membrane-associated Zn-dependent protease   |       |        |       |        |       |        |        |        |
|          | 4  | 17.9%    |      |          |      |          |        |          |                                                      |       |        |       |        |       |        |        |        |
| SGO_1281 | 4  | 44.8%    |      |          | 5    | 59.2%    |        |          | penicillinase repressor, putative                    |       |        |       |        |       |        |        |        |
|          | 4  | 44.8%    | 3    | 36.8%    | 5    | 59.2%    | 3      | 36.8%    |                                                      |       |        |       |        |       |        |        |        |
| SGO_1283 | 13 | 45.2%    | 8    | 27.4%    | 18   | 59.6%    | 11     | 39.5%    | oxidoreductase                                       |       |        |       |        |       |        |        |        |
|          | 14 | 44.1%    | 8    | 32.2%    | 16   | 52.1%    | 10     | 35.8%    |                                                      |       |        |       |        |       |        |        |        |
| SGO_1284 | 7  | 33.2%    | 6    | 33.9%    | 9    | 45.0%    | 4      | 17.4%    | thioredoxin-disulfide reductase                      |       |        |       |        |       |        |        |        |
|          | 9  | 45.3%    | 10   | 43.5%    | 7    | 34.8%    | 6      | 28.9%    |                                                      |       |        |       |        |       |        |        |        |
| SGO_1290 | 6  | 17.1%    |      |          |      |          |        |          | ABC transporter, permease/ATP-binding protein        |       |        |       |        |       |        |        |        |
|          | 7  | 21.6%    |      |          |      |          |        |          |                                                      |       |        |       |        |       |        |        |        |
| SGO_1291 | 6  | 13.8%    |      |          |      |          |        |          | ABC transporter, permease/ATP-binding protein SP1358 |       |        |       |        |       |        |        |        |
|          | 3  | 5.0%     |      |          |      |          |        |          |                                                      |       |        |       |        |       |        |        |        |
| SGO_1293 | 13 | 31.4%    | 11   | 30.3%    | 16   | 37.8%    | 8      | 20.4%    | asnS; asparaginyl-tRNA synthetase                    |       |        |       |        |       |        |        |        |
|          | 15 | 38.1%    | 13   | 36.1%    | 14   | 34.4%    | 9      | 25.6%    |                                                      |       |        |       |        |       |        |        |        |
| SGO_1297 | 9  | 28.8%    | 10   | 42.3%    | 9    | 44.6%    | 8      | 30.9%    | aspC; aspartate aminotransferase                     |       |        |       |        |       |        |        |        |
|          | 8  | 27.0%    | 10   | 42.3%    | 10   | 42.1%    | 8      | 30.4%    |                                                      |       |        |       |        |       |        |        |        |

 Show detected proteins only Show all proteins Filter by category:

ABC Transporter

Proteins found:

1179

Dot Plots Dot Plots

Summary Table

SgFn vs Sg

SgPg vs Sg

SgPgFn vs Sg

SgPg vs SgFn

SgPgFn vs SgFn

SgPgFn vs SgPg

Coverage

| Protein  | <i>Sg</i> |          | <i>SgFn</i> |          | <i>SgPg</i> |          | <i>SgPgFn</i> |          | Description                                        | <i>Sg</i> |        | <i>SgFn</i> |        | <i>SgPg</i> |        | <i>SgPgFn</i> |        |
|----------|-----------|----------|-------------|----------|-------------|----------|---------------|----------|----------------------------------------------------|-----------|--------|-------------|--------|-------------|--------|---------------|--------|
|          | n         | Coverage | n           | Coverage | n           | Coverage | n             | Coverage |                                                    | Rep I     | Rep II | Rep I       | Rep II | Rep I       | Rep II | Rep I         | Rep II |
| SGO_1298 | 5         | 28.4%    |             |          |             |          |               |          | hypothetical protein SGO_1298                      |           |        |             |        |             |        |               |        |
|          | 4         | 25.9%    |             |          |             |          |               |          |                                                    |           |        |             |        |             |        |               |        |
| SGO_1305 | 15        | 42.7%    |             |          | 12          | 38.2%    | 6             | 22.7%    | substrate-binding protein MsmE                     |           |        |             |        |             |        |               |        |
|          | 18        | 45.2%    |             |          | 12          | 35.0%    | 4             | 14.5%    |                                                    |           |        |             |        |             |        |               |        |
| SGO_1312 | 6         | 19.1%    | 14          | 49.5%    | 17          | 60.5%    | 13            | 46.6%    | pepT; peptidase T                                  |           |        |             |        |             |        |               |        |
|          | 8         | 26.2%    | 15          | 56.6%    | 16          | 56.6%    | 12            | 40.4%    |                                                    |           |        |             |        |             |        |               |        |
| SGO_1314 |           |          |             |          |             |          |               |          | metal binding lipoprotein                          |           |        |             |        |             |        |               |        |
|          | 5         | 21.9%    |             |          |             |          |               |          |                                                    |           |        |             |        |             |        |               |        |
| SGO_1315 |           |          | 5           | 36.6%    | 3           | 20.2%    |               |          | trmD; tRNA (guanine-N1)-methyltransferase          |           |        |             |        |             |        |               |        |
|          | 4         | 26.7%    |             |          | 4           | 23.5%    |               |          |                                                    |           |        |             |        |             |        |               |        |
| SGO_1316 | 6         | 37.2%    | 3           | 26.2%    | 5           | 34.9%    |               |          | 16S rRNA processing protein RimM                   |           |        |             |        |             |        |               |        |
|          | 6         | 38.4%    | 3           | 18.6%    | 4           | 33.1%    |               |          |                                                    |           |        |             |        |             |        |               |        |
| SGO_1323 | 3         | 43.3%    | 4           | 50.0%    | 3           | 43.3%    | 3             | 43.3%    | rpsP; ribosomal protein S16                        |           |        |             |        |             |        |               |        |
|          | 3         | 43.3%    | 3           | 43.3%    | 3           | 43.3%    | 3             | 43.3%    |                                                    |           |        |             |        |             |        |               |        |
| SGO_1324 | 5         | 30.6%    |             |          |             |          |               |          | hypothetical protein SGO_1324                      |           |        |             |        |             |        |               |        |
|          | 6         | 30.6%    |             |          |             |          |               |          |                                                    |           |        |             |        |             |        |               |        |
| SGO_1327 | 7         | 35.5%    | 6           | 24.2%    | 8           | 38.7%    | 3             | 15.6%    | HAD-superfamily subfamily IIA hydrolase, TIGR01457 |           |        |             |        |             |        |               |        |
|          | 10        | 43.4%    | 4           | 18.0%    | 8           | 38.7%    | 5             | 21.1%    |                                                    |           |        |             |        |             |        |               |        |
| SGO_1328 |           |          |             |          |             |          |               |          | hypothetical protein SGO_1328                      |           |        |             |        |             |        |               |        |
|          | 3         | 11.8%    |             |          |             |          |               |          |                                                    |           |        |             |        |             |        |               |        |
| SGO_1330 | 3         | 9.1%     |             |          |             |          |               |          | transporter                                        |           |        |             |        |             |        |               |        |
|          | 7         | 16.5%    |             |          |             |          |               |          |                                                    |           |        |             |        |             |        |               |        |
| SGO_1331 |           |          |             |          |             |          |               |          | HlyB/MsbA family ABC transporter                   |           |        |             |        |             |        |               |        |
|          | 5         | 13.1%    |             |          |             |          |               |          |                                                    |           |        |             |        |             |        |               |        |

- Show detected proteins only  
 Show all proteins

Proteins found:  
1179

Filter by category:

ABC Transporter

Dot Plots Dot Plots

Summary Table

SgFn vs Sg

SgPg vs Sg

SgPgFn vs Sg

SgPg vs SgFn

SgPgFn vs SgFn

SgPgFn vs SgPg

Coverage

| Protein  | Sg |          | SgFn |          | SgPg |          | SgPgFn |          | Description                                       | Sg    |        | SgFn  |        | SgPg  |        | SgPgFn |        |
|----------|----|----------|------|----------|------|----------|--------|----------|---------------------------------------------------|-------|--------|-------|--------|-------|--------|--------|--------|
|          | n  | Coverage | n    | Coverage | n    | Coverage | n      | Coverage |                                                   | Rep I | Rep II | Rep I | Rep II | Rep I | Rep II | Rep I  | Rep II |
| SGO_1336 | 12 | 23.9%    | 7    | 14.0%    | 16   | 33.5%    | 5      | 7.1%     | pcrA; ATP-dependent DNA helicase PcrA             |       |        |       |        |       |        |        |        |
|          | 15 | 28.0%    | 8    | 16.3%    | 14   | 27.8%    | 6      | 9.7%     |                                                   |       |        |       |        |       |        |        |        |
| SGO_1337 | 3  | 9.1%     |      |          |      |          |        |          | cation efflux family protein                      |       |        |       |        |       |        |        |        |
|          |    |          |      |          |      |          |        |          |                                                   |       |        |       |        |       |        |        |        |
| SGO_1338 | 8  | 42.2%    | 4    | 30.8%    |      |          |        |          | Signal peptidase I                                |       |        |       |        |       |        |        |        |
|          | 11 | 60.5%    | 4    | 30.8%    | 3    | 15.7%    |        |          |                                                   |       |        |       |        |       |        |        |        |
| SGO_1339 | 25 | 56.1%    | 35   | 79.2%    | 29   | 72.5%    | 27     | 69.1%    | pyk; pyruvate kinase                              |       |        |       |        |       |        |        |        |
|          | 32 | 69.5%    | 36   | 81.0%    | 34   | 78.6%    | 28     | 74.7%    |                                                   |       |        |       |        |       |        |        |        |
| SGO_1340 | 14 | 43.8%    | 20   | 52.7%    | 20   | 61.3%    | 15     | 42.9%    | Phosphofructokinase                               |       |        |       |        |       |        |        |        |
|          | 20 | 60.4%    | 19   | 50.3%    | 20   | 60.1%    | 15     | 42.9%    |                                                   |       |        |       |        |       |        |        |        |
| SGO_1341 | 10 | 14.4%    | 4    | 5.8%     | 4    | 5.7%     |        |          | dnaE; DNA-directed DNA polymerase III alpha chain |       |        |       |        |       |        |        |        |
|          | 8  | 12.2%    | 7    | 10.0%    |      |          |        |          |                                                   |       |        |       |        |       |        |        |        |
| SGO_1342 | 18 | 68.4%    | 18   | 67.5%    | 18   | 65.4%    | 16     | 65.0%    | ABC transporter, ATP-binding protein SP1715       |       |        |       |        |       |        |        |        |
|          | 18 | 68.4%    | 19   | 74.8%    | 17   | 65.4%    | 16     | 65.0%    |                                                   |       |        |       |        |       |        |        |        |
| SGO_1343 | 5  | 15.4%    |      |          | 3    | 10.5%    |        |          | ABC transporter, ATP-binding protein SP1715       |       |        |       |        |       |        |        |        |
|          | 5  | 15.4%    |      |          |      |          |        |          |                                                   |       |        |       |        |       |        |        |        |
| SGO_1347 | 10 | 37.4%    | 3    | 13.5%    |      |          |        |          | membrane associated lipoprotein                   |       |        |       |        |       |        |        |        |
|          | 13 | 45.6%    |      |          |      |          |        |          |                                                   |       |        |       |        |       |        |        |        |
| SGO_1355 | 4  | 27.9%    |      |          |      |          |        |          | lipoprotein, putative                             |       |        |       |        |       |        |        |        |
|          | 4  | 22.1%    | 3    | 16.2%    |      |          |        |          |                                                   |       |        |       |        |       |        |        |        |
| SGO_1360 | 3  | 9.0%     |      |          |      |          |        |          | ABC transporter domain protein                    |       |        |       |        |       |        |        |        |
|          | 6  | 14.6%    |      |          |      |          |        |          |                                                   |       |        |       |        |       |        |        |        |
| SGO_1361 | 3  | 21.1%    | 3    | 23.2%    |      |          |        |          | ADP-ribosylhydrolase                              |       |        |       |        |       |        |        |        |
|          |    |          |      |          |      |          |        |          |                                                   |       |        |       |        |       |        |        |        |

- Show detected proteins only  
 Show all proteins

Proteins found:  
1179

Filter by category:

ABC Transporter

Dot Plots Dot Plots

Summary Table

SgFn vs Sg

SgPg vs Sg

SgPgFn vs Sg

SgPg vs SgFn

SgPgFn vs SgFn

SgPgFn vs SgPg

Coverage

Sg

SgFn

SgPg

SgPgFn

Description

Sg

SgFn

SgPg

SgPgFn

Protein

n Coverage

n Coverage

n Coverage

n Coverage

Rep I Rep II

Rep I Rep II

Rep I Rep II

Rep I Rep II

| Protein  | Sg |          | SgFn |          | SgPg |          | SgPgFn |          | Description                                            | Sg    |        | SgFn  |        | SgPg  |        | SgPgFn |        |
|----------|----|----------|------|----------|------|----------|--------|----------|--------------------------------------------------------|-------|--------|-------|--------|-------|--------|--------|--------|
|          | n  | Coverage | n    | Coverage | n    | Coverage | n      | Coverage |                                                        | Rep I | Rep II | Rep I | Rep II | Rep I | Rep II | Rep I  | Rep II |
| SGO_1364 | 13 | 33.3%    | 4    | 16.4%    | 13   | 42.1%    |        |          | rumA-2; 23S rRNA (uracil-5-)-methyltransferase<br>RumA |       |        |       |        |       |        |        |        |
|          | 17 | 44.5%    | 7    | 27.0%    | 13   | 43.6%    | 4      | 12.3%    |                                                        |       |        |       |        |       |        |        |        |
| SGO_1365 | 14 | 40.2%    | 5    | 13.8%    | 5    | 19.4%    |        |          | transcription regulator yrfE                           |       |        |       |        |       |        |        |        |
|          | 18 | 45.6%    | 6    | 14.0%    | 3    | 8.4%     | 3      | 13.5%    |                                                        |       |        |       |        |       |        |        |        |
| SGO_1366 |    |          |      |          | 6    | 34.5%    |        |          | pheA; prephenate dehydratase                           |       |        |       |        |       |        |        |        |
|          |    |          |      |          | 4    | 21.5%    |        |          |                                                        |       |        |       |        |       |        |        |        |
| SGO_1367 | 5  | 42.2%    | 6    | 39.1%    | 3    | 21.1%    |        |          | aroK; shikimate kinase                                 |       |        |       |        |       |        |        |        |
|          | 6  | 40.4%    | 6    | 42.2%    | 3    | 18.0%    |        |          |                                                        |       |        |       |        |       |        |        |        |
| SGO_1368 | 3  | 8.7%     | 8    | 30.9%    | 5    | 20.4%    |        |          | aroA; 3-phosphoshikimate 1-carboxyvinyltransferase     |       |        |       |        |       |        |        |        |
|          | 6  | 20.4%    | 8    | 32.1%    | 5    | 24.1%    |        |          |                                                        |       |        |       |        |       |        |        |        |
| SGO_1369 | 6  | 28.3%    | 9    | 40.8%    | 5    | 25.3%    | 3      | 15.5%    | L-2-hydroxyisocaproate dehydrogenase                   |       |        |       |        |       |        |        |        |
|          | 8  | 32.2%    | 9    | 43.4%    | 6    | 35.9%    |        |          |                                                        |       |        |       |        |       |        |        |        |
| SGO_1370 | 6  | 73.2%    | 6    | 73.2%    | 6    | 73.2%    | 3      | 33.9%    | Protein of unknown function (DUF964) superfamily       |       |        |       |        |       |        |        |        |
|          | 6  | 73.2%    | 5    | 56.3%    | 4    | 51.8%    | 4      | 51.8%    |                                                        |       |        |       |        |       |        |        |        |
| SGO_1372 | 3  | 10.1%    |      |          | 6    | 30.4%    |        |          | aroC; chorismate synthase                              |       |        |       |        |       |        |        |        |
|          | 8  | 33.8%    | 3    | 15.2%    | 11   | 41.8%    | 3      | 12.6%    |                                                        |       |        |       |        |       |        |        |        |
| SGO_1373 | 3  | 15.8%    |      |          | 5    | 26.8%    | 3      | 17.2%    | aroB; 3-dehydroquinate synthase                        |       |        |       |        |       |        |        |        |
|          | 6  | 25.9%    | 3    | 16.9%    | 5    | 26.8%    |        |          |                                                        |       |        |       |        |       |        |        |        |
| SGO_1374 | 3  | 13.0%    |      |          | 6    | 28.4%    |        |          | aroE; shikimate 5-dehydrogenase                        |       |        |       |        |       |        |        |        |
|          | 4  | 16.8%    |      |          | 3    | 16.8%    |        |          |                                                        |       |        |       |        |       |        |        |        |
| SGO_1375 | 7  | 41.3%    | 4    | 26.2%    | 6    | 37.8%    | 4      | 23.1%    | aroD; 3-dehydroquinate dehydratase, type I             |       |        |       |        |       |        |        |        |
|          | 8  | 50.7%    | 3    | 17.8%    | 6    | 38.2%    |        |          |                                                        |       |        |       |        |       |        |        |        |
| SGO_1376 | 5  | 17.6%    |      |          |      |          |        |          | Methyltransferase                                      |       |        |       |        |       |        |        |        |
|          | 5  | 18.3%    |      |          |      |          |        |          |                                                        |       |        |       |        |       |        |        |        |

 Show detected proteins only Show all proteins

Proteins found:

1179

 Filter by category:

ABC Transporter

Dot Plots Dot Plots

Summary Table

SgFn vs Sg

SgPg vs Sg

SgPgFn vs Sg

SgPg vs SgFn

SgPgFn vs SgFn

SgPgFn vs SgPg

Coverage

| Protein  | <i>Sg</i> |          | <i>SgFn</i> |          | <i>SgPg</i> |          | <i>SgPgFn</i> |          | Description                                                                   | <i>Sg</i> |        | <i>SgFn</i> |        | <i>SgPg</i> |        | <i>SgPgFn</i> |        |
|----------|-----------|----------|-------------|----------|-------------|----------|---------------|----------|-------------------------------------------------------------------------------|-----------|--------|-------------|--------|-------------|--------|---------------|--------|
|          | n         | Coverage | n           | Coverage | n           | Coverage | n             | Coverage |                                                                               | Rep I     | Rep II | Rep I       | Rep II | Rep I       | Rep II | Rep I         | Rep II |
| SGO_1377 | 22        | 43.8%    | 11          | 24.7%    | 11          | 23.6%    | 4             | 6.7%     | sulfatase                                                                     |           |        |             |        |             |        |               |        |
|          | 27        | 49.0%    | 14          | 31.8%    | 13          | 26.2%    | 4             | 8.8%     |                                                                               |           |        |             |        |             |        |               |        |
| SGO_1381 | 18        | 20.0%    | 12          | 13.9%    | 9           | 11.6%    | 3             | 3.1%     | csn1; CRISPR-associated protein, Csn1 family                                  |           |        |             |        |             |        |               |        |
|          | 28        | 27.6%    | 13          | 13.4%    | 12          | 14.8%    | 4             | 4.4%     |                                                                               |           |        |             |        |             |        |               |        |
| SGO_1383 | 9         | 53.0%    | 8           | 47.0%    | 6           | 46.1%    | 6             | 40.0%    | rplS; ribosomal protein L19                                                   |           |        |             |        |             |        |               |        |
|          | 10        | 60.9%    | 10          | 57.4%    | 6           | 40.0%    | 9             | 53.0%    |                                                                               |           |        |             |        |             |        |               |        |
| SGO_1386 |           |          | 8           | 72.7%    | 5           | 62.5%    |               |          | chorismate mutase                                                             |           |        |             |        |             |        |               |        |
|          | 3         | 30.7%    | 7           | 68.2%    | 3           | 48.9%    |               |          |                                                                               |           |        |             |        |             |        |               |        |
| SGO_1388 | 9         | 16.9%    | 3           | 6.4%     |             |          |               |          | pulA-1; pullulanase, type I                                                   |           |        |             |        |             |        |               |        |
|          | 14        | 27.1%    | 6           | 13.1%    |             |          |               |          |                                                                               |           |        |             |        |             |        |               |        |
| SGO_1389 | 6         | 21.4%    | 3           | 11.9%    |             |          |               |          | conserved hypothetical protein TIGR00147                                      |           |        |             |        |             |        |               |        |
|          | 6         | 20.1%    | 4           | 14.2%    |             |          |               |          |                                                                               |           |        |             |        |             |        |               |        |
| SGO_1390 | 13        | 26.8%    | 8           | 16.0%    | 7           | 15.5%    | 6             | 12.7%    | ligA; DNA ligase, NAD-dependent                                               |           |        |             |        |             |        |               |        |
|          | 13        | 29.9%    | 10          | 23.6%    | 7           | 15.3%    | 6             | 12.7%    |                                                                               |           |        |             |        |             |        |               |        |
| SGO_1394 |           |          | 6           | 46.8%    | 3           | 14.5%    |               |          | hypothetical protein SGO_1394                                                 |           |        |             |        |             |        |               |        |
|          |           |          |             |          | 3           | 16.2%    |               |          |                                                                               |           |        |             |        |             |        |               |        |
| SGO_1397 | 8         | 42.8%    | 9           | 41.8%    | 8           | 45.6%    | 6             | 30.2%    | map; methionine aminopeptidase, type I                                        |           |        |             |        |             |        |               |        |
|          | 9         | 48.1%    | 8           | 39.6%    | 8           | 44.2%    | 5             | 26.3%    |                                                                               |           |        |             |        |             |        |               |        |
| SGO_1398 | 15        | 47.8%    | 3           | 8.9%     | 5           | 14.1%    |               |          | hypothetical protein SGO_1398                                                 |           |        |             |        |             |        |               |        |
|          | 14        | 38.4%    | 3           | 8.5%     | 4           | 10.8%    |               |          |                                                                               |           |        |             |        |             |        |               |        |
| SGO_1400 | 6         | 22.9%    | 7           | 20.7%    | 9           | 29.0%    | 6             | 22.6%    | murA-2; UDP-N-acetylglucosamine 1-carboxyvinyltransferase                     |           |        |             |        |             |        |               |        |
|          | 11        | 37.6%    | 6           | 24.8%    | 7           | 23.8%    | 3             | 14.8%    |                                                                               |           |        |             |        |             |        |               |        |
| SGO_1405 |           |          |             |          | 3           | 13.8%    |               |          | hisA; phosphoribosylformimino-5-aminoimidazole carboxamide ribotide isomerase |           |        |             |        |             |        |               |        |

 Show detected proteins only Show all proteins Filter by category:

ABC Transporter

Proteins found:

1179

Dot Plots Dot Plots

Summary Table

SgFn vs Sg

SgPg vs Sg

SgPgFn vs Sg

SgPg vs SgFn

SgPgFn vs SgFn

SgPgFn vs SgPg

Coverage

| Protein  | Sg |          | SgFn |          | SgPg |          | SgPgFn |          | Description                                                                  | Sg    |        | SgFn  |        | SgPg  |        | SgPgFn |        |
|----------|----|----------|------|----------|------|----------|--------|----------|------------------------------------------------------------------------------|-------|--------|-------|--------|-------|--------|--------|--------|
|          | n  | Coverage | n    | Coverage | n    | Coverage | n      | Coverage |                                                                              | Rep I | Rep II | Rep I | Rep II | Rep I | Rep II | Rep I  | Rep II |
| SGO_1413 | 8  | 8.7%     | 6    | 7.4%     | 8    | 8.6%     |        |          | first chain of major exonuclease RexA                                        |       |        |       |        |       |        |        |        |
|          | 16 | 18.0%    | 12   | 15.9%    | 7    | 7.7%     |        |          |                                                                              |       |        |       |        |       |        |        |        |
| SGO_1414 | 8  | 11.5%    | 6    | 8.3%     | 4    | 5.6%     | 3      | 4.8%     | rexB; putative exonuclease RexB                                              |       |        |       |        |       |        |        |        |
|          | 10 | 14.7%    | 8    | 12.2%    | 6    | 9.0%     | 4      | 5.9%     |                                                                              |       |        |       |        |       |        |        |        |
| SGO_1415 | 4  | 5.7%     |      |          |      |          |        |          | LPXTG cell wall surface protein, X-prolyl dipeptidylaminopeptidase, putative |       |        |       |        |       |        |        |        |
|          | 5  | 6.3%     |      |          |      |          |        |          |                                                                              |       |        |       |        |       |        |        |        |
| SGO_1416 |    |          |      |          |      |          |        |          | putative histidine kinase                                                    |       |        |       |        |       |        |        |        |
|          | 5  | 14.8%    |      |          |      |          |        |          |                                                                              |       |        |       |        |       |        |        |        |
| SGO_1417 |    |          |      |          | 4    | 27.1%    |        |          | response regulator protein                                                   |       |        |       |        |       |        |        |        |
|          |    |          |      |          |      |          |        |          |                                                                              |       |        |       |        |       |        |        |        |
| SGO_1422 | 9  | 28.9%    | 10   | 39.0%    | 9    | 34.2%    | 6      | 20.8%    | hypothetical protein SGO_1422                                                |       |        |       |        |       |        |        |        |
|          | 10 | 29.8%    | 10   | 31.3%    | 8    | 25.9%    | 6      | 20.8%    |                                                                              |       |        |       |        |       |        |        |        |
| SGO_1426 | 31 | 75.1%    | 32   | 77.9%    | 32   | 77.2%    | 27     | 75.1%    | eno; enolase                                                                 |       |        |       |        |       |        |        |        |
|          | 31 | 77.0%    | 33   | 85.7%    | 30   | 77.2%    | 31     | 77.2%    |                                                                              |       |        |       |        |       |        |        |        |
| SGO_1431 | 31 | 53.5%    | 21   | 43.6%    | 25   | 47.7%    | 18     | 39.0%    | EzrA; Septation ring formation regulator ezrA                                |       |        |       |        |       |        |        |        |
|          | 28 | 50.3%    | 20   | 41.3%    | 27   | 49.0%    | 20     | 40.1%    |                                                                              |       |        |       |        |       |        |        |        |
| SGO_1432 | 18 | 33.4%    | 12   | 26.5%    | 16   | 33.3%    | 6      | 10.9%    | gyrB; DNA gyrase, B subunit                                                  |       |        |       |        |       |        |        |        |
|          | 20 | 38.7%    | 14   | 34.1%    | 19   | 37.9%    | 6      | 9.4%     |                                                                              |       |        |       |        |       |        |        |        |
| SGO_1434 |    |          | 4    | 29.1%    | 4    | 40.1%    | 3      | 22.0%    | thiJ; 4-methyl-5(beta-hydroxyethyl)-thiazole monophosphate synthesis protein |       |        |       |        |       |        |        |        |
|          | 4  | 32.4%    | 3    | 28.0%    | 3    | 25.8%    |        |          |                                                                              |       |        |       |        |       |        |        |        |
| SGO_1437 | 6  | 9.2%     |      |          |      |          |        |          | DnaQ family exonuclease/DinG family helicase, putative                       |       |        |       |        |       |        |        |        |
|          | 7  | 11.0%    |      |          |      |          |        |          |                                                                              |       |        |       |        |       |        |        |        |
| SGO_1439 | 8  | 23.4%    | 5    | 19.5%    | 5    | 17.5%    | 3      | 17.2%    | ftsX; cell division protein FtsX                                             |       |        |       |        |       |        |        |        |
|          | 10 | 25.6%    | 5    | 21.4%    | 4    | 17.2%    | 3      | 17.2%    |                                                                              |       |        |       |        |       |        |        |        |

- Show detected proteins only
- Show all proteins

Proteins found:  
1179

Filter by category:

ABC Transporter

Dot Plots Dot Plots

Summary Table

SgFn vs Sg

SgPg vs Sg

SgPgFn vs Sg

SgPg vs SgFn

SgPgFn vs SgFn

SgPgFn vs SgPg

Coverage

Sg

SgFn

SgPg

SgPgFn

Description

Sg

SgFn

SgPg

SgPgFn

Protein

n Coverage

n Coverage

n Coverage

n Coverage

Rep I Rep II

Rep I Rep II

Rep I Rep II

Rep I Rep II

| Protein  | Sg |          | SgFn |          | SgPg |          | SgPgFn |          | Description                                                      | Sg    |        | SgFn  |        | SgPg  |        | SgPgFn |        |
|----------|----|----------|------|----------|------|----------|--------|----------|------------------------------------------------------------------|-------|--------|-------|--------|-------|--------|--------|--------|
|          | n  | Coverage | n    | Coverage | n    | Coverage | n      | Coverage |                                                                  | Rep I | Rep II | Rep I | Rep II | Rep I | Rep II | Rep I  | Rep II |
| SGO_1440 | 14 | 69.6%    | 15   | 69.1%    | 10   | 59.1%    | 7      | 43.5%    | cell-division ATP-binding protein FtsE                           |       |        |       |        |       |        |        |        |
|          | 18 | 74.3%    | 13   | 67.4%    | 10   | 55.2%    | 6      | 45.7%    |                                                                  |       |        |       |        |       |        |        |        |
| SGO_1441 | 8  | 29.9%    | 8    | 30.2%    | 9    | 30.2%    | 5      | 20.3%    | prfB; peptide chain release factor 2                             |       |        |       |        |       |        |        |        |
|          | 6  | 22.8%    | 7    | 27.5%    | 11   | 35.2%    | 3      | 11.8%    |                                                                  |       |        |       |        |       |        |        |        |
| SGO_1446 | 12 | 36.0%    | 9    | 27.6%    | 12   | 37.3%    | 4      | 11.2%    | murF; UDP-N-acetylmuramoyl-tripeptide--D-alanyl-D-alanine ligase |       |        |       |        |       |        |        |        |
|          | 14 | 39.7%    | 8    | 25.2%    | 12   | 34.2%    | 3      | 11.4%    |                                                                  |       |        |       |        |       |        |        |        |
| SGO_1447 | 13 | 45.1%    | 8    | 32.2%    | 14   | 52.0%    | 6      | 26.1%    | ddlA; D-Ala-D-Ala ligase                                         |       |        |       |        |       |        |        |        |
|          | 15 | 53.2%    | 8    | 28.7%    | 14   | 50.6%    | 5      | 23.3%    |                                                                  |       |        |       |        |       |        |        |        |
| SGO_1449 | 24 | 47.7%    |      |          | 9    | 21.9%    |        |          | pbp2b; penicillin-binding protein 2B                             |       |        |       |        |       |        |        |        |
|          | 26 | 50.6%    |      |          | 11   | 26.3%    |        |          |                                                                  |       |        |       |        |       |        |        |        |
| SGO_1450 | 6  | 27.1%    | 4    | 19.0%    | 6    | 28.2%    | 3      | 14.8%    | hypothetical protein SGO_1450                                    |       |        |       |        |       |        |        |        |
|          | 7  | 30.6%    | 5    | 23.6%    | 5    | 22.2%    | 6      | 28.2%    |                                                                  |       |        |       |        |       |        |        |        |
| SGO_1451 | 6  | 43.8%    | 4    | 33.5%    | 6    | 42.7%    | 6      | 40.0%    | frr; ribosome recycling factor                                   |       |        |       |        |       |        |        |        |
|          | 7  | 44.3%    | 4    | 33.5%    | 7    | 43.8%    | 6      | 39.5%    |                                                                  |       |        |       |        |       |        |        |        |
| SGO_1452 | 10 | 46.9%    | 6    | 38.6%    | 7    | 45.6%    | 9      | 54.4%    | pyrH; uridylate kinase                                           |       |        |       |        |       |        |        |        |
|          | 9  | 45.2%    | 4    | 27.4%    | 7    | 45.6%    | 6      | 34.0%    |                                                                  |       |        |       |        |       |        |        |        |
| SGO_1453 |    |          |      |          | 4    | 11.7%    | 3      | 6.4%     | glycosyl transferase, family 8 SP1766                            |       |        |       |        |       |        |        |        |
|          |    |          | 3    | 8.7%     |      |          | 3      | 8.3%     |                                                                  |       |        |       |        |       |        |        |        |
| SGO_1454 | 3  | 6.6%     |      |          |      |          |        |          | amino acid permease family protein                               |       |        |       |        |       |        |        |        |
|          | 3  | 6.6%     |      |          |      |          |        |          |                                                                  |       |        |       |        |       |        |        |        |
| SGO_1455 | 8  | 39.3%    | 10   | 59.4%    | 9    | 45.0%    | 9      | 49.3%    | rplA; ribosomal protein L1                                       |       |        |       |        |       |        |        |        |
|          | 12 | 50.7%    | 10   | 55.9%    | 9    | 49.3%    | 9      | 45.0%    |                                                                  |       |        |       |        |       |        |        |        |
| SGO_1456 | 4  | 30.5%    | 4    | 35.5%    | 4    | 30.5%    | 6      | 44.7%    | rplK; ribosomal protein L11                                      |       |        |       |        |       |        |        |        |
|          | 5  | 37.6%    | 5    | 51.8%    | 4    | 30.5%    | 6      | 42.6%    |                                                                  |       |        |       |        |       |        |        |        |

 Show detected proteins only Show all proteins

Proteins found:

1179

 Filter by category:

ABC Transporter

Dot Plots Dot Plots

Summary Table

SgFn vs Sg

SgPg vs Sg

SgPgFn vs Sg

SgPg vs SgFn

SgPgFn vs SgFn

SgPgFn vs SgPg

Coverage

| Protein  | Sg |          | SgFn |          | SgPg |          | SgPgFn |          | Description                                        | Sg    |        | SgFn  |        | SgPg  |        | SgPgFn |        |
|----------|----|----------|------|----------|------|----------|--------|----------|----------------------------------------------------|-------|--------|-------|--------|-------|--------|--------|--------|
|          | n  | Coverage | n    | Coverage | n    | Coverage | n      | Coverage |                                                    | Rep I | Rep II | Rep I | Rep II | Rep I | Rep II | Rep I  | Rep II |
| SGO_1458 | 19 | 33.8%    | 11   | 20.8%    | 5    | 8.2%     | 4      | 7.7%     | aha1; cation-transporting ATPase yfgQ              |       |        |       |        |       |        |        |        |
|          | 21 | 38.2%    | 8    | 15.1%    | 4    | 9.0%     |        |          |                                                    |       |        |       |        |       |        |        |        |
| SGO_1459 |    |          | 6    | 67.2%    | 3    | 35.2%    |        |          | glyoxylase family protein                          |       |        |       |        |       |        |        |        |
|          |    |          | 5    | 65.6%    |      |          |        |          |                                                    |       |        |       |        |       |        |        |        |
| SGO_1460 | 17 | 32.5%    | 4    | 8.7%     | 11   | 23.0%    | 4      | 6.4%     | DNA translocase ftsK                               |       |        |       |        |       |        |        |        |
|          | 19 | 34.3%    | 4    | 8.5%     | 7    | 12.3%    |        |          |                                                    |       |        |       |        |       |        |        |        |
| SGO_1463 | 14 | 61.4%    | 5    | 27.0%    | 11   | 52.1%    | 5      | 27.0%    | peptidyl-prolyl cis-trans isomerase                |       |        |       |        |       |        |        |        |
|          | 15 | 61.4%    | 4    | 17.6%    | 7    | 40.1%    | 6      | 28.5%    |                                                    |       |        |       |        |       |        |        |        |
| SGO_1464 | 10 | 94.9%    |      |          | 8    | 85.9%    | 5      | 84.6%    | uncharacterized probable metal-binding protein     |       |        |       |        |       |        |        |        |
|          | 11 | 100.0%   |      |          | 7    | 85.9%    | 4      | 50.0%    |                                                    |       |        |       |        |       |        |        |        |
| SGO_1465 | 17 | 43.9%    | 8    | 25.5%    | 13   | 34.3%    | 8      | 26.7%    | ABC transporter, ATP-binding protein SP0770        |       |        |       |        |       |        |        |        |
|          | 20 | 50.5%    | 6    | 19.1%    | 10   | 31.4%    | 6      | 21.4%    |                                                    |       |        |       |        |       |        |        |        |
| SGO_1466 | 7  | 40.0%    | 6    | 33.0%    | 7    | 42.2%    |        |          | MTA/SAH nucleosidase                               |       |        |       |        |       |        |        |        |
|          | 4  | 19.6%    | 6    | 27.0%    | 6    | 37.0%    |        |          |                                                    |       |        |       |        |       |        |        |        |
| SGO_1468 | 3  | 20.2%    |      |          |      |          |        |          | MutT/nudix family protein                          |       |        |       |        |       |        |        |        |
| SGO_1469 | 12 | 35.9%    | 10   | 31.2%    | 13   | 48.4%    | 13     | 44.0%    | glmU; UDP-N-acetylglucosamine pyrophosphorylase    |       |        |       |        |       |        |        |        |
|          | 13 | 43.1%    | 7    | 23.7%    | 14   | 45.8%    | 13     | 38.6%    |                                                    |       |        |       |        |       |        |        |        |
| SGO_1472 |    |          | 5    | 24.7%    | 5    | 32.0%    |        |          | acetyltransferase, GNAT family                     |       |        |       |        |       |        |        |        |
|          | 3  | 20.6%    | 3    | 15.0%    | 5    | 30.4%    | 3      | 24.7%    |                                                    |       |        |       |        |       |        |        |        |
| SGO_1475 | 7  | 22.1%    |      |          |      |          |        |          | lipoprotein, putative                              |       |        |       |        |       |        |        |        |
|          | 9  | 32.7%    |      |          |      |          |        |          |                                                    |       |        |       |        |       |        |        |        |
| SGO_1483 | 4  | 9.8%     |      |          |      |          |        |          | ABC transporter, permease protein, probable SP0913 |       |        |       |        |       |        |        |        |

 Show detected proteins only Show all proteins Filter by category:

ABC Transporter

Proteins found:

1179

Dot Plots Dot Plots



Summary Table SgFn vs Sg SgPg vs Sg SgPgFn vs Sg SgPg vs SgFn SgPgFn vs SgFn SgPgFn vs SgPg Coverage

| Protein  | Sg |          | SgFn |          | SgPg |          | SgPgFn |          | Description                                                | Sg    |        | SgFn  |        | SgPg  |        | SgPgFn |        |
|----------|----|----------|------|----------|------|----------|--------|----------|------------------------------------------------------------|-------|--------|-------|--------|-------|--------|--------|--------|
|          | n  | Coverage | n    | Coverage | n    | Coverage | n      | Coverage |                                                            | Rep I | Rep II | Rep I | Rep II | Rep I | Rep II | Rep I  | Rep II |
| SGO_1484 |    |          |      |          | 3    | 20.8%    |        |          | ABC transporter, ATP-binding protein                       |       |        |       |        |       |        |        |        |
|          |    |          |      |          | 3    | 20.8%    |        |          |                                                            |       |        |       |        |       |        |        |        |
| SGO_1486 |    |          | 8    | 5.9%     |      |          | 4      | 3.2%     | beta-galactosidase                                         |       |        |       |        |       |        |        |        |
|          | 5  | 3.1%     |      |          |      |          | 5      | 3.9%     |                                                            |       |        |       |        |       |        |        |        |
| SGO_1487 | 12 | 9.4%     | 11   | 10.5%    |      |          |        |          | LPXTG cell wall surface protein, Cna protein B-type domain |       |        |       |        |       |        |        |        |
|          | 18 | 12.8%    | 7    | 5.0%     | 4    | 4.0%     |        |          |                                                            |       |        |       |        |       |        |        |        |
| SGO_1493 | 10 | 25.3%    | 4    | 12.7%    |      |          |        |          | hypothetical protein SGO_1493                              |       |        |       |        |       |        |        |        |
|          | 14 | 38.9%    | 6    | 19.9%    | 4    | 16.1%    |        |          |                                                            |       |        |       |        |       |        |        |        |
| SGO_1495 | 3  | 34.6%    |      |          |      |          |        |          | putative transcriptional regulator                         |       |        |       |        |       |        |        |        |
|          | 6  | 53.4%    |      |          |      |          |        |          |                                                            |       |        |       |        |       |        |        |        |
| SGO_1498 | 3  | 5.7%     |      |          |      |          |        |          | ABC transporter, permease protein, probable SP0913         |       |        |       |        |       |        |        |        |
| SGO_1504 | 3  | 13.8%    |      |          |      |          |        |          | histidine kinase                                           |       |        |       |        |       |        |        |        |
|          | 5  | 20.9%    |      |          |      |          |        |          |                                                            |       |        |       |        |       |        |        |        |
| SGO_1507 | 7  | 23.6%    |      |          |      |          |        |          | hypothetical protein SGO_1507                              |       |        |       |        |       |        |        |        |
|          | 11 | 30.5%    |      |          |      |          |        |          |                                                            |       |        |       |        |       |        |        |        |
| SGO_1512 | 3  | 9.2%     | 4    | 18.2%    | 5    | 13.7%    |        |          | lacG; 6-phospho-beta-galactosidase                         |       |        |       |        |       |        |        |        |
|          |    |          | 5    | 18.4%    |      |          |        |          |                                                            |       |        |       |        |       |        |        |        |
| SGO_1513 | 3  | 5.5%     |      |          |      |          |        |          | lacE; PTS system, lactose-specific IIBC component          |       |        |       |        |       |        |        |        |
| SGO_1516 | 8  | 37.1%    |      |          | 9    | 44.2%    | 4      | 22.4%    | lacD-2; tagatose 1,6-diphosphate aldolase                  |       |        |       |        |       |        |        |        |
|          | 9  | 31.3%    |      |          | 13   | 53.4%    | 6      | 31.3%    |                                                            |       |        |       |        |       |        |        |        |
| SGO_1518 | 4  | 28.1%    |      |          | 6    | 46.2%    |        |          | lacB-2; galactose-6-phosphate isomerase, LacB subunit      |       |        |       |        |       |        |        |        |
|          | 6  | 33.9%    |      |          | 6    | 46.2%    |        |          |                                                            |       |        |       |        |       |        |        |        |

Show detected proteins only  
 Show all proteins  
 Filter by category:

Proteins found: 1179

Dot Plots Dot Plots

Summary Table SgFn vs Sg SgPg vs Sg SgPgFn vs Sg SgPg vs SgFn SgPgFn vs SgFn SgPgFn vs SgPg Coverage

| Protein  | Sg |          | SgFn |          | SgPg |          | SgPgFn |          | Description                                             | Sg    |        | SgFn  |        | SgPg  |        | SgPgFn |        |
|----------|----|----------|------|----------|------|----------|--------|----------|---------------------------------------------------------|-------|--------|-------|--------|-------|--------|--------|--------|
|          | n  | Coverage | n    | Coverage | n    | Coverage | n      | Coverage |                                                         | Rep I | Rep II | Rep I | Rep II | Rep I | Rep II | Rep I  | Rep II |
| SGO_1520 | 4  | 10.4%    |      |          |      |          |        |          | PTS system, IIC component                               |       |        |       |        |       |        |        |        |
| SGO_1521 | 4  | 47.5%    |      |          |      |          |        |          | PTS system IIB component (galactitol/fructose specific) |       |        |       |        |       |        |        |        |
| SGO_1523 |    |          |      |          |      |          |        |          | lacD-1; tagatose 1,6-diphosphate aldolase               |       |        |       |        |       |        |        |        |
| SGO_1527 | 3  | 17.9%    |      |          |      |          |        |          | Lactose phosphotransferase system repressor             |       |        |       |        |       |        |        |        |
| SGO_1529 | 6  | 32.3%    | 6    | 27.4%    | 5    | 27.7%    |        |          | hypothetical protein SGO_1529                           |       |        |       |        |       |        |        |        |
|          | 10 | 46.7%    | 6    | 34.7%    | 3    | 18.2%    |        |          |                                                         |       |        |       |        |       |        |        |        |
| SGO_1530 | 23 | 46.4%    | 22   | 47.0%    | 26   | 52.9%    | 17     | 36.6%    | methionine-tRNA ligase                                  |       |        |       |        |       |        |        |        |
|          | 27 | 53.5%    | 16   | 33.3%    | 24   | 50.2%    | 15     | 35.0%    |                                                         |       |        |       |        |       |        |        |        |
| SGO_1531 | 11 | 54.9%    | 6    | 29.1%    | 10   | 60.0%    | 6      | 34.9%    | xth; exodeoxyribonuclease III                           |       |        |       |        |       |        |        |        |
|          | 11 | 59.6%    | 5    | 26.5%    | 8    | 49.5%    | 5      | 33.1%    |                                                         |       |        |       |        |       |        |        |        |
| SGO_1534 | 5  | 35.9%    | 4    | 46.2%    | 8    | 68.4%    |        |          | ArsC family                                             |       |        |       |        |       |        |        |        |
|          | 6  | 49.6%    | 5    | 57.3%    | 6    | 62.4%    | 4      | 34.2%    |                                                         |       |        |       |        |       |        |        |        |
| SGO_1536 | 10 | 40.5%    | 4    | 19.4%    | 9    | 43.0%    | 4      | 17.3%    | conserved hypothetical protein TIGR00096                |       |        |       |        |       |        |        |        |
|          | 11 | 45.8%    | 5    | 26.1%    | 10   | 42.3%    | 4      | 18.7%    |                                                         |       |        |       |        |       |        |        |        |
| SGO_1538 | 4  | 20.4%    |      |          |      |          |        |          | DNA-directed DNA polymerase III, delta" chain           |       |        |       |        |       |        |        |        |
|          | 3  | 16.7%    |      |          |      |          |        |          |                                                         |       |        |       |        |       |        |        |        |
| SGO_1539 | 7  | 42.0%    | 7    | 36.3%    | 8    | 48.1%    | 4      | 22.2%    | tmk; thymidylate kinase                                 |       |        |       |        |       |        |        |        |
|          | 7  | 41.5%    | 5    | 29.7%    | 9    | 48.6%    | 6      | 42.0%    |                                                         |       |        |       |        |       |        |        |        |
| SGO_1540 | 3  | 12.2%    |      |          |      |          |        |          | YitT family protein                                     |       |        |       |        |       |        |        |        |
|          | 6  | 19.2%    |      |          | 4    | 23.0%    |        |          |                                                         |       |        |       |        |       |        |        |        |

Show detected proteins only  
 Show all proteins  
 Filter by category:

Proteins found: 1179

Dot Plots Dot Plots

Summary Table

SgFn vs Sg

SgPg vs Sg

SgPgFn vs Sg

SgPg vs SgFn

SgPgFn vs SgFn

SgPgFn vs SgPg

Coverage

Sg

SgFn

SgPg

SgPgFn

Description

Sg

SgFn

SgPg

SgPgFn

Protein

n Coverage

n Coverage

n Coverage

n Coverage

Rep I Rep II

Rep I Rep II

Rep I Rep II

Rep I Rep II

| Protein  | Sg |          | SgFn |          | SgPg |          | SgPgFn |          | Description                                                 | Sg    |        | SgFn  |        | SgPg  |        | SgPgFn |        |
|----------|----|----------|------|----------|------|----------|--------|----------|-------------------------------------------------------------|-------|--------|-------|--------|-------|--------|--------|--------|
|          | n  | Coverage | n    | Coverage | n    | Coverage | n      | Coverage |                                                             | Rep I | Rep II | Rep I | Rep II | Rep I | Rep II | Rep I  | Rep II |
| SGO_1541 | 4  | 33.3%    | 8    | 40.6%    | 5    | 32.6%    | 3      | 27.5%    | atpC; ATP synthase F1, epsilon subunit                      |       |        |       |        |       |        |        |        |
|          | 5  | 33.3%    | 6    | 31.2%    | 4    | 32.6%    | 6      | 39.9%    |                                                             |       |        |       |        |       |        |        |        |
| SGO_1542 | 25 | 73.3%    | 30   | 75.9%    | 24   | 64.1%    | 19     | 58.5%    | atpD; ATP synthase F1, beta subunit                         |       |        |       |        |       |        |        |        |
|          | 30 | 75.4%    | 29   | 72.6%    | 22   | 62.2%    | 20     | 58.8%    |                                                             |       |        |       |        |       |        |        |        |
| SGO_1543 | 15 | 55.6%    | 12   | 55.6%    | 10   | 36.9%    | 4      | 21.2%    | atpG; ATP synthase F1, gamma subunit                        |       |        |       |        |       |        |        |        |
|          | 16 | 50.2%    | 10   | 44.4%    | 11   | 47.1%    | 4      | 19.8%    |                                                             |       |        |       |        |       |        |        |        |
| SGO_1544 | 17 | 41.9%    | 15   | 43.7%    | 17   | 45.1%    | 9      | 26.1%    | atpA; ATP synthase F1, alpha subunit                        |       |        |       |        |       |        |        |        |
|          | 16 | 41.9%    | 17   | 48.3%    | 17   | 45.1%    | 9      | 22.8%    |                                                             |       |        |       |        |       |        |        |        |
| SGO_1545 | 5  | 42.1%    | 6    | 39.9%    | 4    | 28.7%    | 4      | 33.7%    | atpH; ATP synthase F1, delta subunit                        |       |        |       |        |       |        |        |        |
|          | 6  | 46.6%    | 8    | 58.4%    | 4    | 33.7%    | 4      | 33.7%    |                                                             |       |        |       |        |       |        |        |        |
| SGO_1546 | 14 | 56.1%    | 15   | 61.6%    | 10   | 49.4%    | 10     | 47.0%    | atpF; ATP synthase F0, B subunit                            |       |        |       |        |       |        |        |        |
|          | 15 | 61.6%    | 8    | 39.0%    | 11   | 49.4%    | 9      | 48.8%    |                                                             |       |        |       |        |       |        |        |        |
| SGO_1550 | 22 | 38.1%    | 19   | 30.2%    | 25   | 45.0%    | 13     | 22.4%    | glgP-1; glycogen phosphorylase                              |       |        |       |        |       |        |        |        |
|          | 27 | 44.4%    | 26   | 42.7%    | 27   | 44.2%    | 20     | 32.7%    |                                                             |       |        |       |        |       |        |        |        |
| SGO_1551 | 5  | 17.4%    | 14   | 38.0%    | 9    | 25.0%    | 3      | 9.0%     | glgA; Glycogen synthase                                     |       |        |       |        |       |        |        |        |
|          | 14 | 36.8%    | 15   | 42.6%    | 6    | 16.8%    | 5      | 14.7%    |                                                             |       |        |       |        |       |        |        |        |
| SGO_1552 | 8  | 28.6%    | 13   | 47.7%    | 12   | 41.7%    | 8      | 26.6%    | glgD; glucose-1-phosphate adenylyltransferase, GlgD subunit |       |        |       |        |       |        |        |        |
|          | 9  | 26.9%    | 11   | 42.0%    | 12   | 43.7%    | 8      | 33.4%    |                                                             |       |        |       |        |       |        |        |        |
| SGO_1553 | 7  | 23.9%    | 14   | 46.1%    | 14   | 45.5%    | 7      | 27.6%    | glgC; glucose-1-phosphate adenylyltransferase               |       |        |       |        |       |        |        |        |
|          | 10 | 33.9%    | 18   | 53.4%    | 15   | 50.5%    | 7      | 27.1%    |                                                             |       |        |       |        |       |        |        |        |
| SGO_1554 | 13 | 30.8%    | 24   | 47.4%    | 16   | 33.6%    | 12     | 28.9%    | glgB; 1,4-alpha-glucan branching enzyme                     |       |        |       |        |       |        |        |        |
|          | 15 | 34.6%    | 22   | 48.0%    | 20   | 38.5%    | 8      | 21.5%    |                                                             |       |        |       |        |       |        |        |        |
| SGO_1555 | 25 | 62.2%    | 28   | 68.3%    | 28   | 66.6%    | 24     | 55.3%    | ptsI; phosphoenolpyruvate-protein phosphotransferase        |       |        |       |        |       |        |        |        |
|          | 31 | 69.8%    | 31   | 74.5%    | 26   | 65.3%    | 21     | 54.4%    |                                                             |       |        |       |        |       |        |        |        |

 Show detected proteins only Show all proteins Filter by category:

ABC Transporter

Proteins found:

1179

Dot Plots Dot Plots

Summary Table

SgFn vs Sg

SgPg vs Sg

SgPgFn vs Sg

SgPg vs SgFn

SgPgFn vs SgFn

SgPgFn vs SgPg

Coverage

| Protein  | Sg |          | SgFn |          | SgPg |          | SgPgFn |          | Description                                            | Sg    |        | SgFn  |        | SgPg  |        | SgPgFn |        |
|----------|----|----------|------|----------|------|----------|--------|----------|--------------------------------------------------------|-------|--------|-------|--------|-------|--------|--------|--------|
|          | n  | Coverage | n    | Coverage | n    | Coverage | n      | Coverage |                                                        | Rep I | Rep II | Rep I | Rep II | Rep I | Rep II | Rep I  | Rep II |
| SGO_1556 | 3  | 39.1%    | 5    | 41.4%    | 3    | 39.1%    | 3      | 39.1%    | phosphocarrier protein HPr                             |       |        |       |        |       |        |        |        |
|          | 5  | 41.4%    | 4    | 39.1%    | 3    | 39.1%    | 3      | 39.1%    |                                                        |       |        |       |        |       |        |        |        |
| SGO_1557 | 3  | 68.1%    |      |          |      |          |        |          | NrdH-redoxin                                           |       |        |       |        |       |        |        |        |
|          | 3  | 68.1%    |      |          |      |          |        |          |                                                        |       |        |       |        |       |        |        |        |
| SGO_1558 | 27 | 48.0%    | 31   | 53.8%    | 25   | 47.3%    | 19     | 38.8%    | nrdE; ribonucleoside-diphosphate reductase large chain |       |        |       |        |       |        |        |        |
|          | 32 | 49.4%    | 23   | 40.3%    | 30   | 52.0%    | 16     | 30.7%    |                                                        |       |        |       |        |       |        |        |        |
| SGO_1559 | 12 | 40.4%    | 11   | 46.4%    | 13   | 46.4%    | 9      | 33.9%    | ribonucleoside-diphosphate reductase, beta subunit     |       |        |       |        |       |        |        |        |
|          | 13 | 41.1%    | 10   | 38.9%    | 13   | 46.4%    | 9      | 28.2%    |                                                        |       |        |       |        |       |        |        |        |
| SGO_1561 | 3  | 13.6%    |      |          |      |          |        |          | putative zinc metallopeptidase                         |       |        |       |        |       |        |        |        |
|          | 3  | 13.6%    |      |          |      |          |        |          |                                                        |       |        |       |        |       |        |        |        |
| SGO_1562 | 4  | 10.6%    |      |          |      |          |        |          | hypothetical protein SGO_1562                          |       |        |       |        |       |        |        |        |
|          | 3  | 10.6%    |      |          |      |          |        |          |                                                        |       |        |       |        |       |        |        |        |
| SGO_1564 | 3  | 53.7%    |      |          | 3    | 53.7%    |        |          | transcription regulator, probable -related protein     |       |        |       |        |       |        |        |        |
|          | 3  | 53.7%    |      |          | 3    | 53.7%    |        |          |                                                        |       |        |       |        |       |        |        |        |
| SGO_1570 | 33 | 43.5%    | 29   | 42.4%    | 37   | 47.0%    | 23     | 35.4%    | alaS; alanyl-tRNA synthetase                           |       |        |       |        |       |        |        |        |
|          | 41 | 50.2%    | 24   | 38.6%    | 34   | 42.4%    | 29     | 37.4%    |                                                        |       |        |       |        |       |        |        |        |
| SGO_1571 | 6  | 43.5%    |      |          |      |          |        |          | Protein of unknown function (DUF567) superfamily       |       |        |       |        |       |        |        |        |
|          | 7  | 44.7%    |      |          |      |          |        |          |                                                        |       |        |       |        |       |        |        |        |
| SGO_1572 | 26 | 69.3%    | 8    | 32.0%    |      |          |        |          | proteinase maturation protein, putative                |       |        |       |        |       |        |        |        |
|          | 26 | 70.9%    | 5    | 20.7%    |      |          | 4      | 17.8%    |                                                        |       |        |       |        |       |        |        |        |
| SGO_1573 |    |          | 3    | 23.2%    | 3    | 29.4%    |        |          | O-methyltransferase family protein                     |       |        |       |        |       |        |        |        |
|          | 4  | 17.5%    |      |          | 5    | 39.5%    |        |          |                                                        |       |        |       |        |       |        |        |        |
| SGO_1574 | 17 | 35.5%    | 22   | 44.2%    | 21   | 49.8%    | 15     | 29.8%    | pepF-1; oligoendopeptidase F                           |       |        |       |        |       |        |        |        |
|          | 18 | 37.0%    | 21   | 44.7%    | 24   | 52.7%    | 15     | 30.8%    |                                                        |       |        |       |        |       |        |        |        |

 Show detected proteins only Show all proteins Filter by category:

ABC Transporter

Proteins found:

1179

Dot Plots Dot Plots

Summary Table

SgFn vs Sg

SgPg vs Sg

SgPgFn vs Sg

SgPg vs SgFn

SgPgFn vs SgFn

SgPgFn vs SgPg

Coverage

Sg

SgFn

SgPg

SgPgFn

Description

Sg

SgFn

SgPg

SgPgFn

Protein

n Coverage

n Coverage

n Coverage

n Coverage

Rep I Rep II

Rep I Rep II

Rep I Rep II

Rep I Rep II

| Protein  | Sg |          | SgFn |          | SgPg |          | SgPgFn |          | Description                                                  | Sg    |        | SgFn  |        | SgPg  |        | SgPgFn |        |
|----------|----|----------|------|----------|------|----------|--------|----------|--------------------------------------------------------------|-------|--------|-------|--------|-------|--------|--------|--------|
|          | n  | Coverage | n    | Coverage | n    | Coverage | n      | Coverage |                                                              | Rep I | Rep II | Rep I | Rep II | Rep I | Rep II | Rep I  | Rep II |
| SGO_1576 | 3  | 8.9%     |      |          |      |          |        |          | ptcC; PTS system, IIC component                              |       |        |       |        |       |        |        |        |
|          | 3  | 8.2%     |      |          |      |          |        |          |                                                              |       |        |       |        |       |        |        |        |
| SGO_1580 |    |          | 3    | 45.2%    | 4    | 49.0%    | 4      | 49.0%    | PTS system, Lactose/Cellobiose specific IIB subunit          |       |        |       |        |       |        |        |        |
|          |    |          | 3    | 49.0%    | 4    | 49.0%    | 3      | 49.0%    |                                                              |       |        |       |        |       |        |        |        |
| SGO_1585 | 14 | 40.4%    |      |          | 3    | 13.3%    |        |          | D-Alanyl-D-Alanine carboxypeptidase                          |       |        |       |        |       |        |        |        |
|          | 13 | 37.8%    |      |          | 5    | 19.6%    | 3      | 6.7%     |                                                              |       |        |       |        |       |        |        |        |
| SGO_1587 | 5  | 26.9%    | 4    | 23.4%    | 4    | 24.3%    | 4      | 24.3%    | queA; S-adenosylmethionine:tRNA ribosyltransferase-isomerase |       |        |       |        |       |        |        |        |
|          | 9  | 42.1%    | 8    | 33.0%    | 4    | 24.3%    | 3      | 19.0%    |                                                              |       |        |       |        |       |        |        |        |
| SGO_1588 | 4  | 48.1%    |      |          |      |          |        |          | arcR; arginine repressor                                     |       |        |       |        |       |        |        |        |
|          | 5  | 48.1%    |      |          |      |          |        |          |                                                              |       |        |       |        |       |        |        |        |
| SGO_1589 | 5  | 13.5%    | 11   | 29.3%    |      |          |        |          | arcT; putative transaminase/peptidase                        |       |        |       |        |       |        |        |        |
|          | 7  | 19.8%    | 10   | 30.0%    |      |          |        |          |                                                              |       |        |       |        |       |        |        |        |
| SGO_1590 | 5  | 9.9%     | 4    | 9.1%     |      |          |        |          | arcD; arginine-ornithine antiporter                          |       |        |       |        |       |        |        |        |
|          | 6  | 11.7%    | 3    | 9.1%     |      |          |        |          |                                                              |       |        |       |        |       |        |        |        |
| SGO_1591 | 10 | 43.5%    | 17   | 70.8%    | 9    | 39.0%    | 5      | 27.6%    | arcC; carbamate kinase                                       |       |        |       |        |       |        |        |        |
|          | 13 | 54.3%    | 17   | 65.4%    | 7    | 27.6%    | 6      | 32.4%    |                                                              |       |        |       |        |       |        |        |        |
| SGO_1592 | 15 | 53.8%    | 25   | 64.8%    | 12   | 49.4%    | 10     | 42.3%    | arcB; ornithine carbamoyltransferase                         |       |        |       |        |       |        |        |        |
|          | 15 | 52.7%    | 26   | 73.1%    | 12   | 46.7%    | 11     | 45.3%    |                                                              |       |        |       |        |       |        |        |        |
| SGO_1593 | 28 | 72.6%    | 42   | 88.3%    | 20   | 62.3%    | 18     | 60.4%    | arcA; arginine deiminase                                     |       |        |       |        |       |        |        |        |
|          | 30 | 76.5%    | 38   | 84.8%    | 24   | 66.7%    | 17     | 53.3%    |                                                              |       |        |       |        |       |        |        |        |
| SGO_1594 | 5  | 22.8%    |      |          |      |          |        |          | Crp/Fnr family protein                                       |       |        |       |        |       |        |        |        |
|          | 6  | 26.3%    |      |          |      |          |        |          |                                                              |       |        |       |        |       |        |        |        |
| SGO_1598 | 3  | 11.8%    |      |          |      |          |        |          | hypothetical protein SGO_1598                                |       |        |       |        |       |        |        |        |
|          | 5  | 17.4%    |      |          |      |          |        |          |                                                              |       |        |       |        |       |        |        |        |

 Show detected proteins only Show all proteins Filter by category:

ABC Transporter

Proteins found:

1179

Dot Plots Dot Plots

Summary Table

SgFn vs Sg

SgPg vs Sg

SgPgFn vs Sg

SgPg vs SgFn

SgPgFn vs SgFn

SgPgFn vs SgPg

Coverage

Sg

SgFn

SgPg

SgPgFn

Description

Sg

SgFn

SgPg

SgPgFn

Protein

n Coverage

n Coverage

n Coverage

n Coverage

Rep I Rep II

Rep I Rep II

Rep I Rep II

Rep I Rep II

| Protein  | Sg |          | SgFn |          | SgPg |          | SgPgFn |          | Description                                                  | Sg    |        | SgFn  |        | SgPg  |        | SgPgFn |        |
|----------|----|----------|------|----------|------|----------|--------|----------|--------------------------------------------------------------|-------|--------|-------|--------|-------|--------|--------|--------|
|          | n  | Coverage | n    | Coverage | n    | Coverage | n      | Coverage |                                                              | Rep I | Rep II | Rep I | Rep II | Rep I | Rep II | Rep I  | Rep II |
| SGO_1599 | 10 | 56.2%    | 15   | 57.2%    | 10   | 52.2%    | 10     | 56.2%    | sodA; manganese-dependent superoxide dismutase               |       |        |       |        |       |        |        |        |
|          | 9  | 52.2%    | 13   | 57.2%    | 10   | 52.2%    | 11     | 56.2%    |                                                              |       |        |       |        |       |        |        |        |
| SGO_1600 | 6  | 25.8%    |      |          |      |          |        |          | DNA polymerase III, delta chain                              |       |        |       |        |       |        |        |        |
|          | 7  | 27.8%    |      |          |      |          |        |          |                                                              |       |        |       |        |       |        |        |        |
| SGO_1601 | 3  | 4.0%     |      |          |      |          |        |          | celB; DNA internalization-related competence protein<br>celB |       |        |       |        |       |        |        |        |
|          | 4  | 5.6%     |      |          |      |          |        |          |                                                              |       |        |       |        |       |        |        |        |
| SGO_1604 | 12 | 48.3%    | 6    | 30.5%    | 6    | 28.4%    |        |          | acyltransferase family protein                               |       |        |       |        |       |        |        |        |
|          | 15 | 55.9%    | 5    | 32.6%    | 5    | 23.7%    | 3      | 18.6%    |                                                              |       |        |       |        |       |        |        |        |
| SGO_1605 | 16 | 29.3%    | 3    | 6.5%     | 5    | 11.0%    |        |          | P-type ATPase, metal cation transport                        |       |        |       |        |       |        |        |        |
|          | 20 | 31.3%    | 3    | 8.0%     | 5    | 11.9%    | 3      | 6.1%     |                                                              |       |        |       |        |       |        |        |        |
| SGO_1606 | 4  | 25.0%    |      |          | 4    | 25.0%    |        |          | DNA methyltransferase signature protein                      |       |        |       |        |       |        |        |        |
|          | 4  | 25.0%    |      |          | 3    | 19.2%    |        |          |                                                              |       |        |       |        |       |        |        |        |
| SGO_1609 | 18 | 45.9%    | 7    | 17.2%    | 14   | 38.4%    | 12     | 35.2%    | ATP-dependent RNA helicase, DEAD/DEAH box family             |       |        |       |        |       |        |        |        |
|          | 22 | 51.2%    | 6    | 17.0%    | 15   | 42.8%    | 13     | 35.0%    |                                                              |       |        |       |        |       |        |        |        |
| SGO_1614 | 9  | 32.5%    |      |          |      |          |        |          | magnesium and cobalt transporter CorA family                 |       |        |       |        |       |        |        |        |
|          | 8  | 25.2%    |      |          |      |          |        |          |                                                              |       |        |       |        |       |        |        |        |
| SGO_1617 | 12 | 37.0%    | 8    | 20.6%    | 10   | 23.9%    | 9      | 24.1%    | prfC; peptide chain release factor 3                         |       |        |       |        |       |        |        |        |
|          | 19 | 48.2%    | 10   | 20.4%    | 16   | 38.1%    | 9      | 25.9%    |                                                              |       |        |       |        |       |        |        |        |
| SGO_1619 | 26 | 34.0%    | 10   | 17.4%    | 21   | 32.7%    | 12     | 19.7%    | cation-transporting ATPase, E1-E2 family                     |       |        |       |        |       |        |        |        |
|          | 26 | 34.0%    | 15   | 26.8%    | 20   | 35.2%    | 11     | 18.3%    |                                                              |       |        |       |        |       |        |        |        |
| SGO_1621 | 8  | 25.2%    | 6    | 21.7%    | 5    | 16.9%    | 3      | 10.4%    | HD domain protein                                            |       |        |       |        |       |        |        |        |
|          | 9  | 26.3%    | 9    | 31.2%    | 7    | 25.2%    |        |          |                                                              |       |        |       |        |       |        |        |        |
| SGO_1622 | 9  | 40.5%    | 6    | 30.5%    | 6    | 29.0%    | 6      | 29.0%    | Cof family protein                                           |       |        |       |        |       |        |        |        |
|          | 10 | 43.1%    | 4    | 21.2%    | 6    | 29.7%    | 4      | 20.1%    |                                                              |       |        |       |        |       |        |        |        |

 Show detected proteins only Show all proteins Filter by category:

ABC Transporter

Proteins found:

1179

Dot Plots Dot Plots

Summary Table

SgFn vs Sg

SgPg vs Sg

SgPgFn vs Sg

SgPg vs SgFn

SgPgFn vs SgFn

SgPgFn vs SgPg

Coverage

Sg

SgFn

SgPg

SgPgFn

Description

Sg

SgFn

SgPg

SgPgFn

| Protein  | Sg |          | SgFn |          | SgPg |          | SgPgFn |          | Description                                                             | Sg    |        | SgFn  |        | SgPg  |        | SgPgFn |        |
|----------|----|----------|------|----------|------|----------|--------|----------|-------------------------------------------------------------------------|-------|--------|-------|--------|-------|--------|--------|--------|
|          | n  | Coverage | n    | Coverage | n    | Coverage | n      | Coverage |                                                                         | Rep I | Rep II | Rep I | Rep II | Rep I | Rep II | Rep I  | Rep II |
| SGO_1623 | 10 | 31.5%    | 8    | 23.2%    | 11   | 37.2%    | 5      | 20.5%    | murM; MurM                                                              |       |        |       |        |       |        |        |        |
|          | 15 | 48.7%    | 8    | 24.9%    | 11   | 39.1%    |        |          |                                                                         |       |        |       |        |       |        |        |        |
| SGO_1624 | 8  | 25.1%    | 7    | 17.8%    | 5    | 15.6%    |        |          | murN; MurN protein                                                      |       |        |       |        |       |        |        |        |
|          | 10 | 25.1%    | 7    | 24.1%    | 5    | 13.1%    | 5      | 14.8%    |                                                                         |       |        |       |        |       |        |        |        |
| SGO_1625 | 15 | 77.1%    | 11   | 61.9%    | 13   | 64.2%    | 9      | 57.8%    | acetoin utilization putative/CBS domain protein                         |       |        |       |        |       |        |        |        |
|          | 16 | 77.5%    | 10   | 55.5%    | 12   | 59.6%    | 6      | 39.4%    |                                                                         |       |        |       |        |       |        |        |        |
| SGO_1626 | 9  | 50.8%    |      |          | 8    | 45.3%    | 4      | 23.7%    | branched-chain amino acid ABC transporter, ATP-binding protein          |       |        |       |        |       |        |        |        |
|          | 9  | 46.6%    | 5    | 32.2%    | 8    | 42.8%    | 6      | 35.2%    |                                                                         |       |        |       |        |       |        |        |        |
| SGO_1627 | 7  | 41.7%    |      |          | 6    | 37.0%    | 5      | 33.1%    | branched-chain amino acid ABC transporter, ATP-binding protein          |       |        |       |        |       |        |        |        |
|          | 10 | 46.9%    |      |          | 5    | 27.6%    | 5      | 33.1%    |                                                                         |       |        |       |        |       |        |        |        |
| SGO_1630 | 25 | 62.9%    | 15   | 50.0%    | 20   | 61.1%    | 17     | 52.3%    | branched-chain amino acid ABC transporter, amino acid-binding protein   |       |        |       |        |       |        |        |        |
|          | 30 | 70.4%    | 14   | 45.6%    | 20   | 59.3%    | 16     | 47.9%    |                                                                         |       |        |       |        |       |        |        |        |
| SGO_1631 | 3  | 28.1%    |      |          |      |          |        |          | hypothetical protein SGO_1631                                           |       |        |       |        |       |        |        |        |
|          | 3  | 29.2%    |      |          |      |          |        |          |                                                                         |       |        |       |        |       |        |        |        |
| SGO_1632 | 4  | 15.8%    | 5    | 39.8%    | 5    | 37.8%    | 6      | 36.7%    | clpP; ATP-dependent Clp protease, proteolytic subunit ClpP              |       |        |       |        |       |        |        |        |
|          | 5  | 21.4%    | 5    | 39.8%    | 5    | 37.8%    | 4      | 15.8%    |                                                                         |       |        |       |        |       |        |        |        |
| SGO_1633 | 9  | 58.9%    | 14   | 67.5%    | 14   | 67.5%    | 12     | 66.5%    | upp; uracil phosphoribosyltransferase                                   |       |        |       |        |       |        |        |        |
|          | 12 | 59.8%    | 14   | 72.2%    | 13   | 67.5%    | 10     | 54.1%    |                                                                         |       |        |       |        |       |        |        |        |
| SGO_1634 | 34 | 42.7%    | 5    | 9.5%     | 8    | 13.9%    |        |          | magnesium-translocating P-type ATPase                                   |       |        |       |        |       |        |        |        |
|          | 35 | 44.0%    | 5    | 6.5%     | 6    | 8.7%     |        |          |                                                                         |       |        |       |        |       |        |        |        |
| SGO_1638 | 6  | 15.4%    | 9    | 22.2%    | 8    | 25.6%    |        |          | murE; UDP-N-acetylmuramoylalanyl-D-glutamate-2,6-diaminopimelate ligase |       |        |       |        |       |        |        |        |
|          | 6  | 15.6%    | 10   | 31.4%    | 6    | 16.8%    |        |          |                                                                         |       |        |       |        |       |        |        |        |
| SGO_1648 | 10 | 43.4%    | 12   | 59.5%    | 12   | 58.8%    | 10     | 43.1%    | ppx1; inorganic pyrophosphatase, manganese-dependent                    |       |        |       |        |       |        |        |        |
|          | 12 | 46.6%    | 11   | 53.4%    | 12   | 58.8%    | 8      | 36.0%    |                                                                         |       |        |       |        |       |        |        |        |

 Show detected proteins only Show all proteins

Proteins found:

1179

 Filter by category:

ABC Transporter

Dot Plots Dot Plots

Summary Table

SgFn vs Sg

SgPg vs Sg

SgPgFn vs Sg

SgPg vs SgFn

SgPgFn vs SgFn

SgPgFn vs SgPg

Coverage

| Protein  | Sg |          | SgFn |          | SgPg |          | SgPgFn |          | Description                                                  | Sg    |        | SgFn  |        | SgPg  |        | SgPgFn |        |
|----------|----|----------|------|----------|------|----------|--------|----------|--------------------------------------------------------------|-------|--------|-------|--------|-------|--------|--------|--------|
|          | n  | Coverage | n    | Coverage | n    | Coverage | n      | Coverage |                                                              | Rep I | Rep II | Rep I | Rep II | Rep I | Rep II | Rep I  | Rep II |
| SGO_1649 | 9  | 45.7%    | 6    | 33.1%    | 3    | 14.1%    | 3      | 14.1%    | act; pyruvate formate-lyase-activating enzyme                |       |        |       |        |       |        |        |        |
|          | 12 | 58.0%    | 10   | 48.0%    | 5    | 23.4%    |        |          |                                                              |       |        |       |        |       |        |        |        |
| SGO_1650 | 14 | 22.5%    |      |          |      |          |        |          | LPXTG cell wall surface protein, collagen binding domain     |       |        |       |        |       |        |        |        |
|          | 16 | 24.8%    |      |          |      |          |        |          |                                                              |       |        |       |        |       |        |        |        |
| SGO_1651 | 28 | 45.6%    | 20   | 32.7%    |      |          |        |          | LPXTG cell wall surface protein, nuclease/phosphatase domain |       |        |       |        |       |        |        |        |
|          | 31 | 46.6%    | 18   | 34.1%    |      |          |        |          |                                                              |       |        |       |        |       |        |        |        |
| SGO_1652 | 13 | 31.2%    | 5    | 13.9%    | 12   | 31.1%    | 7      | 18.3%    | intracellular glycosyl hydrolase                             |       |        |       |        |       |        |        |        |
|          | 12 | 28.7%    | 4    | 10.9%    | 10   | 29.4%    | 7      | 19.2%    |                                                              |       |        |       |        |       |        |        |        |
| SGO_1653 | 20 | 32.4%    | 9    | 18.5%    | 12   | 25.9%    | 5      | 10.9%    | trehalose PTS enzyme II                                      |       |        |       |        |       |        |        |        |
|          | 25 | 35.0%    | 5    | 9.6%     | 12   | 24.5%    | 7      | 14.1%    |                                                              |       |        |       |        |       |        |        |        |
| SGO_1655 | 10 | 27.1%    | 5    | 16.1%    | 4    | 12.1%    |        |          | CBS domain protein/possible hemolysin                        |       |        |       |        |       |        |        |        |
|          | 15 | 33.0%    | 6    | 20.2%    | 4    | 13.0%    |        |          |                                                              |       |        |       |        |       |        |        |        |
| SGO_1657 | 4  | 5.3%     |      |          |      |          |        |          | membrane protein                                             |       |        |       |        |       |        |        |        |
|          | 6  | 8.0%     |      |          |      |          |        |          |                                                              |       |        |       |        |       |        |        |        |
| SGO_1661 | 3  | 11.2%    |      |          |      |          |        |          | radical SAM protein, TIGR01212 family                        |       |        |       |        |       |        |        |        |
|          | 6  | 31.7%    | 6    | 26.9%    |      |          |        |          |                                                              |       |        |       |        |       |        |        |        |
| SGO_1665 |    |          |      |          |      |          |        |          | rRNA methylase                                               |       |        |       |        |       |        |        |        |
|          | 4  | 35.7%    |      |          |      |          |        |          |                                                              |       |        |       |        |       |        |        |        |
| SGO_1666 | 16 | 39.5%    | 14   | 34.8%    | 13   | 35.8%    | 6      | 19.6%    | trkA; potassium uptake protein, Trk family                   |       |        |       |        |       |        |        |        |
|          | 20 | 47.0%    | 14   | 38.3%    | 13   | 36.9%    | 4      | 14.3%    |                                                              |       |        |       |        |       |        |        |        |
| SGO_1669 | 12 | 45.0%    | 11   | 55.8%    | 11   | 40.5%    | 10     | 47.1%    | ribosomal large subunit pseudouridine synthase B             |       |        |       |        |       |        |        |        |
|          | 17 | 57.4%    | 8    | 36.4%    | 13   | 45.9%    | 8      | 33.9%    |                                                              |       |        |       |        |       |        |        |        |
| SGO_1670 | 4  | 30.9%    |      |          |      |          |        |          | scpB; segregation and condensation protein B                 |       |        |       |        |       |        |        |        |
|          |    |          |      |          |      |          |        |          |                                                              |       |        |       |        |       |        |        |        |

- Show detected proteins only  
 Show all proteins

Proteins found:  
1179

Filter by category:

ABC Transporter

Dot Plots Dot Plots



Summary Table

SgFn vs Sg

SgPg vs Sg

SgPgFn vs Sg

SgPg vs SgFn

SgPgFn vs SgFn

SgPgFn vs SgPg

Coverage

| Protein  | Sg |          | SgFn |          | SgPg |          | SgPgFn |          | Description                                                       | Sg    |        | SgFn  |        | SgPg  |        | SgPgFn |        |
|----------|----|----------|------|----------|------|----------|--------|----------|-------------------------------------------------------------------|-------|--------|-------|--------|-------|--------|--------|--------|
|          | n  | Coverage | n    | Coverage | n    | Coverage | n      | Coverage |                                                                   | Rep I | Rep II | Rep I | Rep II | Rep I | Rep II | Rep I  | Rep II |
| SGO_1674 | 5  | 32.4%    | 4    | 29.5%    | 5    | 27.7%    |        |          | phosphodiesterase, MJ0936 family                                  |       |        |       |        |       |        |        |        |
|          | 5  | 32.4%    | 5    | 37.0%    | 3    | 22.5%    |        |          |                                                                   |       |        |       |        |       |        |        |        |
| SGO_1675 | 7  | 26.2%    | 6    | 20.9%    | 9    | 40.3%    | 3      | 12.6%    | HAM1 protein-like protein                                         |       |        |       |        |       |        |        |        |
|          | 11 | 37.5%    | 8    | 31.7%    | 7    | 35.4%    | 4      | 16.9%    |                                                                   |       |        |       |        |       |        |        |        |
| SGO_1676 | 4  | 22.3%    | 4    | 23.5%    | 9    | 45.5%    | 4      | 23.1%    | murI; glutamate racemase                                          |       |        |       |        |       |        |        |        |
|          | 4  | 25.4%    | 4    | 21.6%    | 11   | 59.8%    | 6      | 29.9%    |                                                                   |       |        |       |        |       |        |        |        |
| SGO_1678 | 4  | 13.9%    | 6    | 24.0%    | 6    | 23.8%    | 3      | 13.0%    | lysA; diaminopimelate decarboxylase                               |       |        |       |        |       |        |        |        |
|          | 5  | 19.2%    | 6    | 22.4%    | 3    | 13.0%    |        |          |                                                                   |       |        |       |        |       |        |        |        |
| SGO_1679 | 19 | 60.8%    | 15   | 64.7%    | 17   | 60.8%    | 16     | 61.4%    | phosphotransferase system enzyme II                               |       |        |       |        |       |        |        |        |
|          | 23 | 68.1%    | 19   | 68.4%    | 16   | 59.9%    | 15     | 59.6%    |                                                                   |       |        |       |        |       |        |        |        |
| SGO_1680 | 4  | 18.7%    |      |          | 4    | 18.7%    | 4      | 18.7%    | phosphotransferase system enzyme II                               |       |        |       |        |       |        |        |        |
|          | 4  | 18.7%    |      |          | 4    | 18.7%    |        |          |                                                                   |       |        |       |        |       |        |        |        |
| SGO_1681 | 13 | 44.2%    | 10   | 41.9%    | 10   | 41.9%    | 9      | 38.6%    | PTS system, mannose/fructose/sorbose family, IID component        |       |        |       |        |       |        |        |        |
|          | 15 | 44.2%    | 7    | 35.6%    | 10   | 41.9%    | 9      | 38.6%    |                                                                   |       |        |       |        |       |        |        |        |
| SGO_1683 | 19 | 55.1%    | 17   | 60.2%    | 18   | 61.9%    | 11     | 40.0%    | serS; seryl-tRNA synthetase                                       |       |        |       |        |       |        |        |        |
|          | 19 | 56.5%    | 13   | 50.6%    | 19   | 63.3%    | 13     | 43.5%    |                                                                   |       |        |       |        |       |        |        |        |
| SGO_1684 | 7  | 26.3%    |      |          | 12   | 46.6%    | 7      | 28.0%    | acyl-CoA dehydrogenase family                                     |       |        |       |        |       |        |        |        |
|          | 6  | 24.3%    |      |          | 12   | 43.8%    | 9      | 36.7%    |                                                                   |       |        |       |        |       |        |        |        |
| SGO_1685 | 4  | 33.0%    | 5    | 34.1%    | 5    | 37.4%    | 4      | 26.4%    | putative peroxidase / antioxidant                                 |       |        |       |        |       |        |        |        |
|          | 4  | 26.9%    | 4    | 33.0%    | 5    | 37.4%    | 3      | 25.3%    |                                                                   |       |        |       |        |       |        |        |        |
| SGO_1687 | 10 | 48.0%    | 11   | 48.4%    | 10   | 48.0%    | 7      | 35.9%    | accA; acetyl-CoA carboxylase, carboxyl transferase, alpha subunit |       |        |       |        |       |        |        |        |
|          | 8  | 36.3%    | 8    | 35.2%    | 10   | 44.5%    | 9      | 39.1%    |                                                                   |       |        |       |        |       |        |        |        |
| SGO_1688 | 7  | 25.4%    | 8    | 36.2%    | 10   | 43.6%    | 5      | 22.3%    | accD; acetyl-CoA carboxylase, carboxyl transferase, beta subunit  |       |        |       |        |       |        |        |        |
|          | 13 | 41.1%    | 9    | 35.2%    | 11   | 45.3%    | 4      | 17.1%    |                                                                   |       |        |       |        |       |        |        |        |

 Show detected proteins only Show all proteins Filter by category:

ABC Transporter

Proteins found:

1179

Dot Plots Dot Plots

Summary Table

SgFn vs Sg

SgPg vs Sg

SgPgFn vs Sg

SgPg vs SgFn

SgPgFn vs SgFn

SgPgFn vs SgPg

Coverage

Sg

SgFn

SgPg

SgPgFn

Description

Sg

SgFn

SgPg

SgPgFn

Protein

n Coverage

n Coverage

n Coverage

n Coverage

Rep I Rep II

Rep I Rep II

Rep I Rep II

Rep I Rep II

| Protein  | Sg |          | SgFn |          | SgPg |          | SgPgFn |          | Description                                                    | Sg    |        | SgFn  |        | SgPg  |        | SgPgFn |        |
|----------|----|----------|------|----------|------|----------|--------|----------|----------------------------------------------------------------|-------|--------|-------|--------|-------|--------|--------|--------|
|          | n  | Coverage | n    | Coverage | n    | Coverage | n      | Coverage |                                                                | Rep I | Rep II | Rep I | Rep II | Rep I | Rep II | Rep I  | Rep II |
| SGO_1689 | 14 | 48.1%    | 13   | 48.4%    | 13   | 44.9%    | 9      | 29.0%    | accC; acetyl-CoA carboxylase, biotin carboxylase               |       |        |       |        |       |        |        |        |
|          | 14 | 45.8%    | 14   | 52.3%    | 15   | 51.0%    | 9      | 32.2%    |                                                                |       |        |       |        |       |        |        |        |
| SGO_1690 |    |          | 3    | 27.1%    | 6    | 40.0%    | 4      | 34.3%    | fabZ; beta-hydroxyacyl-(acyl-carrier-protein) dehydratase FabZ |       |        |       |        |       |        |        |        |
|          |    |          | 5    | 40.7%    | 7    | 46.4%    |        |          |                                                                |       |        |       |        |       |        |        |        |
| SGO_1691 | 4  | 25.3%    | 8    | 42.0%    | 7    | 39.5%    | 6      | 27.8%    | accB; acetyl-CoA carboxylase, biotin carboxyl carrier protein  |       |        |       |        |       |        |        |        |
|          | 5  | 28.4%    | 9    | 47.5%    | 8    | 46.3%    | 6      | 39.5%    |                                                                |       |        |       |        |       |        |        |        |
| SGO_1692 | 15 | 65.4%    | 25   | 74.1%    | 22   | 78.8%    | 17     | 63.7%    | 3-oxoacyl-[acyl-carrier-protein] synthase                      |       |        |       |        |       |        |        |        |
|          | 17 | 62.0%    | 27   | 77.3%    | 21   | 71.2%    | 16     | 61.2%    |                                                                |       |        |       |        |       |        |        |        |
| SGO_1693 | 7  | 39.3%    | 11   | 55.7%    | 15   | 73.0%    | 9      | 50.0%    | fabG; 3-oxoacyl-(acyl-carrier-protein) reductase               |       |        |       |        |       |        |        |        |
|          | 11 | 47.5%    | 12   | 59.4%    | 13   | 63.5%    | 4      | 20.9%    |                                                                |       |        |       |        |       |        |        |        |
| SGO_1694 | 10 | 45.4%    | 9    | 43.5%    | 11   | 58.5%    | 10     | 43.8%    | fabD; malonyl CoA-acyl carrier protein transacylase            |       |        |       |        |       |        |        |        |
|          | 13 | 55.9%    | 9    | 42.2%    | 13   | 60.8%    | 8      | 38.2%    |                                                                |       |        |       |        |       |        |        |        |
| SGO_1695 | 12 | 52.2%    | 15   | 57.1%    | 17   | 60.8%    | 13     | 54.9%    | enoyl-acyl carrier protein(ACP) reductase                      |       |        |       |        |       |        |        |        |
|          | 13 | 52.8%    | 12   | 52.2%    | 13   | 50.0%    | 10     | 45.4%    |                                                                |       |        |       |        |       |        |        |        |
| SGO_1698 | 4  | 22.8%    |      |          | 6    | 27.2%    |        |          | 3-oxoacyl-[acyl-carrier-protein] synthase III                  |       |        |       |        |       |        |        |        |
|          | 7  | 32.1%    |      |          | 4    | 22.5%    |        |          |                                                                |       |        |       |        |       |        |        |        |
| SGO_1699 | 4  | 48.3%    | 3    | 40.8%    | 4    | 47.5%    |        |          | transcriptional regulator, MarR family                         |       |        |       |        |       |        |        |        |
|          | 5  | 48.3%    | 4    | 50.8%    | 4    | 48.3%    | 3      | 40.8%    |                                                                |       |        |       |        |       |        |        |        |
| SGO_1700 | 7  | 33.8%    | 9    | 45.6%    | 7    | 30.4%    | 4      | 18.6%    | enoyl-CoA hydratase/isomerase family protein                   |       |        |       |        |       |        |        |        |
|          | 6  | 25.5%    | 9    | 47.9%    | 6    | 30.4%    |        |          |                                                                |       |        |       |        |       |        |        |        |
| SGO_1701 | 11 | 28.7%    | 12   | 40.8%    | 17   | 52.4%    | 11     | 31.6%    | aspartate kinase                                               |       |        |       |        |       |        |        |        |
|          | 14 | 37.3%    | 16   | 45.6%    | 19   | 55.9%    | 10     | 27.4%    |                                                                |       |        |       |        |       |        |        |        |
| SGO_1708 | 16 | 62.9%    | 11   | 42.7%    | 14   | 65.5%    | 9      | 43.6%    | amiF; Oligopeptide transport ATP-binding protein amiF          |       |        |       |        |       |        |        |        |
|          | 20 | 74.6%    | 10   | 51.1%    | 13   | 65.1%    | 9      | 49.5%    |                                                                |       |        |       |        |       |        |        |        |

 Show detected proteins only Show all proteins

Proteins found:

1179

 Filter by category:

ABC Transporter

Dot Plots Dot Plots

Summary Table

SgFn vs Sg

SgPg vs Sg

SgPgFn vs Sg

SgPg vs SgFn

SgPgFn vs SgFn

SgPgFn vs SgPg

Coverage

| Sg |          | SgFn |          | SgPg |          | SgPgFn |          |
|----|----------|------|----------|------|----------|--------|----------|
| n  | Coverage | n    | Coverage | n    | Coverage | n      | Coverage |

Description

| Sg    |        | SgFn  |        | SgPg  |        | SgPgFn |        |
|-------|--------|-------|--------|-------|--------|--------|--------|
| Rep I | Rep II | Rep I | Rep II | Rep I | Rep II | Rep I  | Rep II |

| Protein  | Sg |          | SgFn |          | SgPg |          | SgPgFn |          | Description                                          | Sg    |        | SgFn  |        | SgPg  |        | SgPgFn |        |
|----------|----|----------|------|----------|------|----------|--------|----------|------------------------------------------------------|-------|--------|-------|--------|-------|--------|--------|--------|
|          | n  | Coverage | n    | Coverage | n    | Coverage | n      | Coverage |                                                      | Rep I | Rep II | Rep I | Rep II | Rep I | Rep II | Rep I  | Rep II |
| SGO_1709 | 16 | 49.6%    | 9    | 34.1%    | 11   | 40.0%    | 12     | 42.5%    | amiE; Oligopeptide transport ATP-binding protein     |       |        |       |        |       |        |        |        |
|          | 17 | 51.8%    | 10   | 33.2%    | 11   | 40.0%    | 12     | 44.5%    |                                                      |       |        |       |        |       |        |        |        |
| SGO_1710 | 6  | 16.2%    |      |          | 5    | 15.6%    | 4      | 13.0%    | amiD; Oligopeptide transport system permease protein |       |        |       |        |       |        |        |        |
|          | 9  | 24.7%    |      |          | 4    | 15.3%    | 4      | 17.9%    |                                                      |       |        |       |        |       |        |        |        |
| SGO_1711 | 19 | 31.1%    | 7    | 14.9%    | 11   | 23.1%    | 10     | 20.1%    | hppB; Oligopeptide transport system permease         |       |        |       |        |       |        |        |        |
|          | 22 | 38.0%    | 7    | 15.1%    | 14   | 30.1%    | 12     | 25.5%    |                                                      |       |        |       |        |       |        |        |        |
| SGO_1712 | 36 | 53.2%    | 27   | 45.9%    | 31   | 51.3%    | 31     | 53.5%    | hppA; oligopeptide-binding lipoprotein               |       |        |       |        |       |        |        |        |
|          | 42 | 57.0%    | 21   | 45.6%    | 31   | 50.1%    | 27     | 49.2%    |                                                      |       |        |       |        |       |        |        |        |
| SGO_1713 | 35 | 57.1%    | 29   | 54.2%    | 33   | 58.0%    | 28     | 54.4%    | hppG; oligopeptide-binding lipoprotein               |       |        |       |        |       |        |        |        |
|          | 38 | 58.5%    | 22   | 47.6%    | 30   | 52.6%    | 20     | 43.6%    |                                                      |       |        |       |        |       |        |        |        |
| SGO_1715 | 32 | 61.7%    | 23   | 49.5%    | 31   | 62.4%    | 21     | 42.9%    | hppH; oligopeptide-binding lipoprotein               |       |        |       |        |       |        |        |        |
|          | 35 | 64.1%    | 23   | 48.5%    | 29   | 57.5%    | 23     | 47.9%    |                                                      |       |        |       |        |       |        |        |        |
| SGO_1716 | 40 | 68.0%    | 24   | 47.2%    | 26   | 50.7%    | 21     | 46.1%    | oligopeptide binding protein                         |       |        |       |        |       |        |        |        |
|          | 38 | 66.9%    | 18   | 38.6%    | 29   | 58.3%    | 17     | 37.8%    |                                                      |       |        |       |        |       |        |        |        |
| SGO_1717 | 16 | 58.5%    | 4    | 16.3%    | 4    | 13.3%    |        |          | pbp3; penicillin-binding protein 3                   |       |        |       |        |       |        |        |        |
|          | 16 | 59.5%    | 4    | 13.6%    |      |          |        |          |                                                      |       |        |       |        |       |        |        |        |
| SGO_1718 | 16 | 36.4%    | 10   | 30.2%    | 16   | 51.5%    | 9      | 23.6%    | sufB-1; FeS assembly protein SufB                    |       |        |       |        |       |        |        |        |
|          | 20 | 50.9%    | 14   | 36.8%    | 13   | 39.1%    | 11     | 26.4%    |                                                      |       |        |       |        |       |        |        |        |
| SGO_1719 | 4  | 33.8%    |      |          |      |          |        |          | SUF system FeS assembly protein, NifU family         |       |        |       |        |       |        |        |        |
|          | 3  | 33.8%    |      |          |      |          |        |          |                                                      |       |        |       |        |       |        |        |        |
| SGO_1720 | 4  | 15.1%    |      |          | 8    | 34.4%    | 4      | 19.3%    | aminotransferase, class-V                            |       |        |       |        |       |        |        |        |
|          | 9  | 38.5%    |      |          | 6    | 25.6%    | 3      | 16.1%    |                                                      |       |        |       |        |       |        |        |        |
| SGO_1721 | 9  | 28.8%    | 8    | 28.6%    | 10   | 31.2%    | 10     | 31.2%    | sufD; FeS assembly protein SufD                      |       |        |       |        |       |        |        |        |
|          | 8  | 26.0%    | 8    | 28.6%    | 11   | 34.3%    | 6      | 23.3%    |                                                      |       |        |       |        |       |        |        |        |

- Show detected proteins only  
 Show all proteins

Proteins found:  
1179

Filter by category:

ABC Transporter

Dot Plots Dot Plots

Summary Table

SgFn vs Sg

SgPg vs Sg

SgPgFn vs Sg

SgPg vs SgFn

SgPgFn vs SgFn

SgPgFn vs SgPg

Coverage

Sg

SgFn

SgPg

SgPgFn

Description

Sg

SgFn

SgPg

SgPgFn

Protein

n Coverage

n Coverage

n Coverage

n Coverage

Rep I Rep II

Rep I Rep II

Rep I Rep II

Rep I Rep II

| Protein  | Sg |          | SgFn |          | SgPg |          | SgPgFn |          | Description                                                     | Sg    |        | SgFn  |        | SgPg  |        | SgPgFn |        |
|----------|----|----------|------|----------|------|----------|--------|----------|-----------------------------------------------------------------|-------|--------|-------|--------|-------|--------|--------|--------|
|          | n  | Coverage | n    | Coverage | n    | Coverage | n      | Coverage |                                                                 | Rep I | Rep II | Rep I | Rep II | Rep I | Rep II | Rep I  | Rep II |
| SGO_1722 | 9  | 34.8%    | 11   | 50.0%    | 14   | 56.3%    | 7      | 25.8%    | sufC; FeS assembly ATPase SufC                                  |       |        |       |        |       |        |        |        |
|          | 9  | 39.1%    | 5    | 25.4%    | 10   | 48.4%    | 5      | 19.5%    |                                                                 |       |        |       |        |       |        |        |        |
| SGO_1724 | 3  | 13.6%    |      |          |      |          |        |          | mecA; Adapter protein mec                                       |       |        |       |        |       |        |        |        |
|          | 6  | 32.6%    | 3    | 23.6%    | 4    | 24.8%    |        |          |                                                                 |       |        |       |        |       |        |        |        |
| SGO_1725 | 3  | 12.4%    |      |          |      |          |        |          | bacA; bacitracin resistance protein                             |       |        |       |        |       |        |        |        |
|          | 3  | 12.4%    |      |          |      |          |        |          |                                                                 |       |        |       |        |       |        |        |        |
| SGO_1726 | 8  | 16.7%    |      |          |      |          |        |          | hypothetical protein SGO_1726                                   |       |        |       |        |       |        |        |        |
|          | 10 | 18.3%    |      |          |      |          |        |          |                                                                 |       |        |       |        |       |        |        |        |
| SGO_1727 | 16 | 44.3%    | 7    | 24.8%    | 8    | 28.4%    | 4      | 16.9%    | amino acid ABC transporter, amino acid-binding/permease protein |       |        |       |        |       |        |        |        |
|          | 16 | 43.6%    | 7    | 23.8%    | 10   | 33.2%    | 4      | 16.7%    |                                                                 |       |        |       |        |       |        |        |        |
| SGO_1728 | 8  | 44.7%    | 6    | 45.1%    | 7    | 44.3%    | 7      | 33.3%    | glnQ; glutamine ABC transporter ATP-binding protein             |       |        |       |        |       |        |        |        |
|          | 9  | 47.6%    | 6    | 40.7%    | 6    | 40.7%    | 6      | 38.6%    |                                                                 |       |        |       |        |       |        |        |        |
| SGO_1729 |    |          | 5    | 68.1%    | 4    | 61.1%    | 3      | 50.0%    | hypothetical protein SGO_1729                                   |       |        |       |        |       |        |        |        |
|          |    |          | 4    | 61.1%    | 4    | 61.1%    | 4      | 61.1%    |                                                                 |       |        |       |        |       |        |        |        |
| SGO_1730 | 26 | 75.6%    | 25   | 71.5%    | 19   | 61.7%    | 13     | 51.9%    | SPFH domain/Band 7 family                                       |       |        |       |        |       |        |        |        |
|          | 32 | 78.3%    | 25   | 70.5%    | 21   | 63.4%    | 19     | 54.9%    |                                                                 |       |        |       |        |       |        |        |        |
| SGO_1731 | 3  | 23.6%    | 4    | 22.1%    | 6    | 38.2%    | 4      | 26.1%    | DNA-binding response regulator                                  |       |        |       |        |       |        |        |        |
|          | 3  | 18.6%    | 3    | 24.1%    | 8    | 49.7%    | 6      | 37.2%    |                                                                 |       |        |       |        |       |        |        |        |
| SGO_1732 | 6  | 19.1%    |      |          |      |          |        |          | histidine kinase                                                |       |        |       |        |       |        |        |        |
|          | 7  | 23.0%    |      |          | 3    | 9.6%     |        |          |                                                                 |       |        |       |        |       |        |        |        |
| SGO_1735 | 22 | 61.0%    | 21   | 58.5%    | 21   | 56.0%    | 18     | 50.7%    | hypothetical protein SGO_1735                                   |       |        |       |        |       |        |        |        |
|          | 23 | 64.6%    | 25   | 60.6%    | 21   | 56.0%    | 16     | 47.3%    |                                                                 |       |        |       |        |       |        |        |        |
| SGO_1736 | 4  | 33.1%    | 4    | 33.1%    | 4    | 33.1%    | 3      | 28.9%    | alkaline shock protein                                          |       |        |       |        |       |        |        |        |
|          | 4  | 33.1%    | 4    | 33.1%    | 4    | 33.1%    |        |          |                                                                 |       |        |       |        |       |        |        |        |

 Show detected proteins only Show all proteins Filter by category:

ABC Transporter

Proteins found:

1179

Dot Plots Dot Plots

Summary Table

SgFn vs Sg

SgPg vs Sg

SgPgFn vs Sg

SgPg vs SgFn

SgPgFn vs SgFn

SgPgFn vs SgPg

Coverage

| Protein  | Sg |          | SgFn |          | SgPg |          | SgPgFn |          | Description                                                         | Sg    |        | SgFn  |        | SgPg  |        | SgPgFn |        |
|----------|----|----------|------|----------|------|----------|--------|----------|---------------------------------------------------------------------|-------|--------|-------|--------|-------|--------|--------|--------|
|          | n  | Coverage | n    | Coverage | n    | Coverage | n      | Coverage |                                                                     | Rep I | Rep II | Rep I | Rep II | Rep I | Rep II | Rep I  | Rep II |
| SGO_1737 | 3  | 38.7%    |      |          |      |          |        |          | rpmB; ribosomal protein L28                                         |       |        |       |        |       |        |        |        |
|          | 4  | 40.3%    |      |          |      |          | 4      | 40.3%    |                                                                     |       |        |       |        |       |        |        |        |
| SGO_1738 | 4  | 21.2%    |      |          |      |          |        |          | hypothetical protein SGO_1738                                       |       |        |       |        |       |        |        |        |
|          | 4  | 21.2%    | 3    | 14.0%    |      |          |        |          |                                                                     |       |        |       |        |       |        |        |        |
| SGO_1739 | 6  | 36.5%    | 3    | 27.7%    |      |          |        |          | LytTr DNA-binding domain family                                     |       |        |       |        |       |        |        |        |
|          | 7  | 36.5%    |      |          |      |          |        |          |                                                                     |       |        |       |        |       |        |        |        |
| SGO_1744 | 9  | 34.8%    | 7    | 25.8%    |      |          |        |          | ABC transporter, ATP-binding protein SP0636                         |       |        |       |        |       |        |        |        |
|          | 8  | 34.2%    |      |          |      |          |        |          |                                                                     |       |        |       |        |       |        |        |        |
| SGO_1745 | 15 | 51.9%    | 18   | 54.9%    | 14   | 51.2%    | 16     | 54.9%    | fba; fructose-1,6-bisphosphate aldolase, class II                   |       |        |       |        |       |        |        |        |
|          | 17 | 56.7%    | 22   | 63.8%    | 15   | 51.2%    | 16     | 54.9%    |                                                                     |       |        |       |        |       |        |        |        |
| SGO_1747 |    |          |      |          | 3    | 25.0%    | 3      | 27.2%    | hypothetical protein SGO_1747                                       |       |        |       |        |       |        |        |        |
|          |    |          | 3    | 27.2%    | 3    | 33.1%    |        |          |                                                                     |       |        |       |        |       |        |        |        |
| SGO_1748 | 9  | 25.0%    |      |          | 7    | 23.8%    | 6      | 21.0%    | pyrG; CTP synthase                                                  |       |        |       |        |       |        |        |        |
|          | 11 | 24.2%    | 3    | 11.4%    | 12   | 36.5%    | 6      | 17.9%    |                                                                     |       |        |       |        |       |        |        |        |
| SGO_1749 | 7  | 36.6%    | 6    | 28.0%    | 8    | 43.6%    | 3      | 11.5%    | manA; mannose-6-phosphate isomerase, class I                        |       |        |       |        |       |        |        |        |
|          | 9  | 42.7%    | 10   | 47.1%    | 7    | 36.6%    | 6      | 28.0%    |                                                                     |       |        |       |        |       |        |        |        |
| SGO_1750 | 11 | 21.4%    |      |          |      |          |        |          | ABC-type multidrug/protein/lipid transport system, ATPase component |       |        |       |        |       |        |        |        |
|          | 13 | 25.1%    |      |          |      |          |        |          |                                                                     |       |        |       |        |       |        |        |        |
| SGO_1751 | 13 | 27.0%    |      |          | 3    | 6.1%     |        |          | ABC-type multidrug/protein/lipid transport system, ATPase component |       |        |       |        |       |        |        |        |
|          | 13 | 28.2%    |      |          | 6    | 11.4%    |        |          |                                                                     |       |        |       |        |       |        |        |        |
| SGO_1753 | 3  | 22.8%    |      |          |      |          |        |          | hypothetical protein SGO_1753                                       |       |        |       |        |       |        |        |        |
| SGO_1755 | 8  | 47.2%    | 6    | 39.5%    | 11   | 67.6%    | 11     | 67.6%    | scrK; fructokinase                                                  |       |        |       |        |       |        |        |        |
|          | 8  | 43.5%    | 7    | 47.2%    | 12   | 67.6%    | 9      | 57.5%    |                                                                     |       |        |       |        |       |        |        |        |

- Show detected proteins only
- Show all proteins

Filter by category:

ABC Transporter

Proteins found:  
1179

Dot Plots Dot Plots

Summary Table SgFn vs Sg SgPg vs Sg SgPgFn vs Sg SgPg vs SgFn SgPgFn vs SgFn SgPgFn vs SgPg Coverage

| Protein  | Sg |          | SgFn |          | SgPg |          | SgPgFn |          | Description                                              | Sg    |        | SgFn  |        | SgPg  |        | SgPgFn |        |
|----------|----|----------|------|----------|------|----------|--------|----------|----------------------------------------------------------|-------|--------|-------|--------|-------|--------|--------|--------|
|          | n  | Coverage | n    | Coverage | n    | Coverage | n      | Coverage |                                                          | Rep I | Rep II | Rep I | Rep II | Rep I | Rep II | Rep I  | Rep II |
| SGO_1756 | 6  | 49.4%    |      |          |      |          |        |          | hypothetical protein SGO_1756                            |       |        |       |        |       |        |        |        |
| SGO_1757 | 19 | 44.4%    | 13   | 34.3%    | 24   | 54.6%    | 14     | 39.3%    | glmS; glucosamine--fructose-6-phosphate aminotransferase |       |        |       |        |       |        |        |        |
|          | 24 | 48.4%    | 12   | 35.0%    | 25   | 61.0%    | 17     | 47.6%    |                                                          |       |        |       |        |       |        |        |        |
| SGO_1760 |    |          | 3    | 9.6%     | 4    | 14.3%    |        |          | DNA-binding response regulator                           |       |        |       |        |       |        |        |        |
| SGO_1761 | 6  | 13.8%    |      |          |      |          |        |          | histidine kinase                                         |       |        |       |        |       |        |        |        |
|          | 10 | 18.9%    |      |          |      |          |        |          |                                                          |       |        |       |        |       |        |        |        |
| SGO_1763 | 18 | 48.4%    | 17   | 46.1%    | 17   | 54.5%    | 15     | 53.9%    | ABC transporter, substrate-binding protein SP0092        |       |        |       |        |       |        |        |        |
|          | 20 | 56.6%    | 11   | 39.3%    | 19   | 56.4%    | 12     | 40.7%    |                                                          |       |        |       |        |       |        |        |        |
| SGO_1768 | 6  | 13.8%    | 12   | 23.7%    | 3    | 7.9%     |        |          | glycosyl hydrolase, family 38                            |       |        |       |        |       |        |        |        |
|          | 5  | 10.5%    | 13   | 26.6%    | 8    | 15.5%    |        |          |                                                          |       |        |       |        |       |        |        |        |
| SGO_1772 | 3  | 11.8%    |      |          |      |          |        |          | integral membrane protein                                |       |        |       |        |       |        |        |        |
| SGO_1774 | 5  | 27.5%    | 8    | 36.5%    | 6    | 30.4%    | 4      | 21.2%    | alcohol dehydrogenase, zinc-containing                   |       |        |       |        |       |        |        |        |
|          | 8  | 40.6%    | 8    | 39.4%    | 6    | 29.0%    | 4      | 23.8%    |                                                          |       |        |       |        |       |        |        |        |
| SGO_1780 | 3  | 16.7%    | 3    | 14.3%    |      |          |        |          | hypothetical protein SGO_1780                            |       |        |       |        |       |        |        |        |
| SGO_1784 | 14 | 20.6%    | 20   | 28.6%    | 16   | 25.1%    | 12     | 20.9%    | leuS; leucyl-tRNA synthetase                             |       |        |       |        |       |        |        |        |
|          | 18 | 25.1%    | 12   | 21.4%    | 16   | 26.9%    | 16     | 27.7%    |                                                          |       |        |       |        |       |        |        |        |
| SGO_1792 |    |          | 3    | 12.8%    |      |          |        |          | transcription regulator                                  |       |        |       |        |       |        |        |        |
| SGO_1799 | 19 | 42.5%    | 32   | 72.1%    | 26   | 63.3%    | 23     | 59.8%    | endopeptidase O                                          |       |        |       |        |       |        |        |        |
|          | 25 | 51.6%    | 27   | 65.1%    | 28   | 64.3%    | 16     | 41.7%    |                                                          |       |        |       |        |       |        |        |        |

Show detected proteins only  
 Show all proteins  
 Filter by category:

Proteins found: 1179

Dot Plots Dot Plots

Summary Table

SgFn vs Sg

SgPg vs Sg

SgPgFn vs Sg

SgPg vs SgFn

SgPgFn vs SgFn

SgPgFn vs SgPg

Coverage

| Protein  | <i>Sg</i> |          | <i>SgFn</i> |          | <i>SgPg</i> |          | <i>SgPgFn</i> |          | Description                                                   | <i>Sg</i> |        | <i>SgFn</i> |        | <i>SgPg</i> |        | <i>SgPgFn</i> |        |
|----------|-----------|----------|-------------|----------|-------------|----------|---------------|----------|---------------------------------------------------------------|-----------|--------|-------------|--------|-------------|--------|---------------|--------|
|          | n         | Coverage | n           | Coverage | n           | Coverage | n             | Coverage |                                                               | Rep I     | Rep II | Rep I       | Rep II | Rep I       | Rep II | Rep I         | Rep II |
| SGO_1800 | 18        | 76.2%    |             |          | 10          | 56.1%    | 6             | 34.3%    | troB; manganese ABC transporter, ATP-binding protein SP1648   |           |        |             |        |             |        |               |        |
|          | 19        | 75.7%    |             |          | 10          | 53.1%    | 6             | 30.1%    |                                                               |           |        |             |        |             |        |               |        |
| SGO_1802 | 26        | 75.2%    | 7           | 38.4%    | 21          | 70.6%    | 16            | 71.6%    | Metal ABC transporter substrate-binding lipoprotein precursor |           |        |             |        |             |        |               |        |
|          | 32        | 85.8%    | 4           | 27.4%    | 18          | 66.8%    | 16            | 72.6%    |                                                               |           |        |             |        |             |        |               |        |
| SGO_1803 | 4         | 37.4%    | 5           | 51.5%    | 5           | 51.5%    | 4             | 29.4%    | tpx; thioredoxin peroxidase                                   |           |        |             |        |             |        |               |        |
|          | 5         | 38.0%    | 5           | 51.5%    | 7           | 52.1%    | 3             | 28.8%    |                                                               |           |        |             |        |             |        |               |        |
| SGO_1804 |           |          | 6           | 23.0%    | 10          | 40.1%    |               |          | hutI; imidazolonepropionase                                   |           |        |             |        |             |        |               |        |
|          | 4         | 18.1%    | 4           | 17.8%    | 10          | 37.1%    |               |          |                                                               |           |        |             |        |             |        |               |        |
| SGO_1805 | 3         | 7.0%     | 3           | 7.1%     | 16          | 29.4%    | 8             | 16.3%    | hutU; urocanate hydratase                                     |           |        |             |        |             |        |               |        |
|          |           |          |             |          | 20          | 39.1%    | 3             | 5.6%     |                                                               |           |        |             |        |             |        |               |        |
| SGO_1806 |           |          |             |          | 9           | 38.5%    | 5             | 20.7%    | ftcD; glutamate formiminotransferase                          |           |        |             |        |             |        |               |        |
|          |           |          |             |          | 9           | 29.4%    | 4             | 16.4%    |                                                               |           |        |             |        |             |        |               |        |
| SGO_1807 |           |          |             |          | 3           | 23.6%    |               |          | serine cycle enzyme, putative                                 |           |        |             |        |             |        |               |        |
|          |           |          |             |          | 3           | 23.6%    |               |          |                                                               |           |        |             |        |             |        |               |        |
| SGO_1808 |           |          |             |          | 6           | 18.7%    | 3             | 7.9%     | fhs-2; formate--tetrahydrofolate ligase                       |           |        |             |        |             |        |               |        |
|          |           |          | 4           | 9.5%     | 6           | 18.3%    | 5             | 13.5%    |                                                               |           |        |             |        |             |        |               |        |
| SGO_1811 | 4         | 12.3%    |             |          | 5           | 15.4%    |               |          | hutH; histidine ammonia-lyase                                 |           |        |             |        |             |        |               |        |
|          | 5         | 15.4%    | 3           | 10.7%    | 7           | 22.2%    | 4             | 12.3%    |                                                               |           |        |             |        |             |        |               |        |
| SGO_1813 |           |          | 3           | 12.8%    |             |          |               |          | hutG; formimidoylglutamase                                    |           |        |             |        |             |        |               |        |
|          | 3         | 11.6%    |             |          |             |          |               |          |                                                               |           |        |             |        |             |        |               |        |
| SGO_1814 | 6         | 7.9%     | 6           | 7.7%     |             |          |               |          | putative regulatory protein                                   |           |        |             |        |             |        |               |        |
|          | 5         | 6.5%     | 5           | 8.8%     |             |          |               |          |                                                               |           |        |             |        |             |        |               |        |
| SGO_1816 | 3         | 15.8%    | 6           | 33.0%    |             |          |               |          | scaR; ScaR Manganese-dependent regulator of scaCBA            |           |        |             |        |             |        |               |        |
|          | 4         | 23.7%    | 5           | 24.7%    | 5           | 27.9%    |               |          |                                                               |           |        |             |        |             |        |               |        |

 Show detected proteins only Show all proteins Filter by category:

ABC Transporter

Proteins found:

1179

Dot Plots Dot Plots

Summary Table

SgFn vs Sg

SgPg vs Sg

SgPgFn vs Sg

SgPg vs SgFn

SgPgFn vs SgFn

SgPgFn vs SgPg

Coverage

| Sg |          | SgFn |          | SgPg |          | SgPgFn |          |
|----|----------|------|----------|------|----------|--------|----------|
| n  | Coverage | n    | Coverage | n    | Coverage | n      | Coverage |
| 22 | 33.7%    | 9    | 15.3%    | 10   | 19.5%    | 4      | 7.0%     |
| 25 | 39.8%    | 10   | 15.6%    | 5    | 11.0%    |        |          |

Description

| Sg    |        | SgFn  |        | SgPg  |        | SgPgFn |        |
|-------|--------|-------|--------|-------|--------|--------|--------|
| Rep I | Rep II | Rep I | Rep II | Rep I | Rep II | Rep I  | Rep II |
|       |        |       |        |       |        |        |        |

| Protein  | Sg |          | SgFn |          | SgPg |          | SgPgFn |          | Description                                                 | Sg    |        | SgFn  |        | SgPg  |        | SgPgFn |        |
|----------|----|----------|------|----------|------|----------|--------|----------|-------------------------------------------------------------|-------|--------|-------|--------|-------|--------|--------|--------|
|          | n  | Coverage | n    | Coverage | n    | Coverage | n      | Coverage |                                                             | Rep I | Rep II | Rep I | Rep II | Rep I | Rep II | Rep I  | Rep II |
| SGO_1822 | 22 | 33.7%    | 9    | 15.3%    | 10   | 19.5%    | 4      | 7.0%     | relA; GTP diphosphokinase                                   |       |        |       |        |       |        |        |        |
|          | 25 | 39.8%    | 10   | 15.6%    | 5    | 11.0%    |        |          |                                                             |       |        |       |        |       |        |        |        |
| SGO_1823 |    |          |      |          | 4    | 28.3%    |        |          | conserved hypothetical protein TIGR00046                    |       |        |       |        |       |        |        |        |
|          |    |          |      |          | 3    | 19.0%    |        |          |                                                             |       |        |       |        |       |        |        |        |
| SGO_1824 | 6  | 34.6%    | 4    | 25.5%    | 4    | 25.5%    | 5      | 30.8%    | prmA; ribosomal protein L11 methyltransferase               |       |        |       |        |       |        |        |        |
|          | 8  | 40.6%    | 5    | 27.7%    | 6    | 36.2%    | 5      | 29.6%    |                                                             |       |        |       |        |       |        |        |        |
| SGO_1827 | 5  | 35.3%    | 3    | 27.6%    | 3    | 27.6%    |        |          | hypothetical protein SGO_1827                               |       |        |       |        |       |        |        |        |
|          | 4  | 27.6%    |      |          | 3    | 27.6%    |        |          |                                                             |       |        |       |        |       |        |        |        |
| SGO_1828 | 6  | 19.7%    | 5    | 15.4%    | 3    | 12.6%    |        |          | ATPase, AAA family                                          |       |        |       |        |       |        |        |        |
|          | 3  | 12.8%    | 3    | 10.4%    | 4    | 15.6%    | 3      | 11.4%    |                                                             |       |        |       |        |       |        |        |        |
| SGO_1834 | 5  | 27.6%    | 11   | 69.9%    | 6    | 43.4%    | 8      | 54.1%    | hypothetical protein SGO_1834                               |       |        |       |        |       |        |        |        |
|          | 5  | 28.1%    | 11   | 73.5%    | 7    | 52.6%    | 8      | 55.6%    |                                                             |       |        |       |        |       |        |        |        |
| SGO_1835 |    |          | 3    | 29.9%    | 3    | 29.9%    |        |          | hypothetical protein SGO_1835                               |       |        |       |        |       |        |        |        |
|          | 3  | 29.9%    |      |          | 3    | 29.9%    | 3      | 47.8%    |                                                             |       |        |       |        |       |        |        |        |
| SGO_1843 | 11 | 33.4%    | 14   | 49.4%    | 13   | 38.0%    | 10     | 31.2%    | pepS; aminopeptidase PepS                                   |       |        |       |        |       |        |        |        |
|          | 12 | 40.0%    | 11   | 43.8%    | 13   | 38.0%    | 10     | 29.5%    |                                                             |       |        |       |        |       |        |        |        |
| SGO_1844 | 5  | 7.9%     | 6    | 10.5%    | 10   | 18.9%    | 3      | 6.5%     | cbxX/cfqX family protein                                    |       |        |       |        |       |        |        |        |
|          | 12 | 20.0%    | 9    | 16.1%    | 12   | 18.6%    | 5      | 10.0%    |                                                             |       |        |       |        |       |        |        |        |
| SGO_1847 | 13 | 12.5%    | 10   | 8.7%     | 10   | 9.4%     |        |          | polC; DNA polymerase III, alpha subunit, Gram-positive type |       |        |       |        |       |        |        |        |
|          | 15 | 14.6%    | 11   | 12.0%    | 14   | 13.9%    | 6      | 4.8%     |                                                             |       |        |       |        |       |        |        |        |
| SGO_1848 | 9  | 47.8%    |      |          | 4    | 23.9%    | 5      | 22.2%    | lipoprotein, putative                                       |       |        |       |        |       |        |        |        |
|          | 10 | 48.3%    |      |          | 4    | 23.9%    | 4      | 17.8%    |                                                             |       |        |       |        |       |        |        |        |
| SGO_1849 | 8  | 68.4%    |      |          |      |          |        |          | hypothetical protein SGO_1849                               |       |        |       |        |       |        |        |        |
|          | 7  | 63.2%    |      |          |      |          |        |          |                                                             |       |        |       |        |       |        |        |        |

- Show detected proteins only  
 Show all proteins

Proteins found:  
1179

Filter by category:

ABC Transporter

Dot Plots Dot Plots



Summary Table

SgFn vs Sg

SgPg vs Sg

SgPgFn vs Sg

SgPg vs SgFn

SgPgFn vs SgFn

SgPgFn vs SgPg

Coverage

| Protein  | Sg |          | SgFn |          | SgPg |          | SgPgFn |          | Description                                          | Sg    |        | SgFn  |        | SgPg  |        | SgPgFn |        |
|----------|----|----------|------|----------|------|----------|--------|----------|------------------------------------------------------|-------|--------|-------|--------|-------|--------|--------|--------|
|          | n  | Coverage | n    | Coverage | n    | Coverage | n      | Coverage |                                                      | Rep I | Rep II | Rep I | Rep II | Rep I | Rep II | Rep I  | Rep II |
| SGO_1851 | 25 | 54.5%    | 21   | 45.9%    | 25   | 54.7%    | 19     | 37.2%    | proS; prolyl-tRNA synthetase                         |       |        |       |        |       |        |        |        |
|          | 28 | 55.8%    | 23   | 53.7%    | 28   | 60.2%    | 20     | 45.0%    |                                                      |       |        |       |        |       |        |        |        |
| SGO_1852 | 9  | 27.6%    |      |          | 5    | 17.7%    | 4      | 16.8%    | membrane-associated zinc metalloprotease, putative   |       |        |       |        |       |        |        |        |
|          | 10 | 29.7%    |      |          | 5    | 18.5%    |        |          |                                                      |       |        |       |        |       |        |        |        |
| SGO_1854 | 12 | 57.0%    | 6    | 34.5%    | 6    | 32.1%    | 6      | 32.1%    | uppS; undecaprenyl diphosphate synthase              |       |        |       |        |       |        |        |        |
|          | 12 | 50.6%    | 6    | 32.1%    | 7    | 39.4%    | 6      | 28.5%    |                                                      |       |        |       |        |       |        |        |        |
| SGO_1855 | 4  | 47.3%    |      |          | 3    | 47.3%    |        |          | preprotein translocase, YajC subunit                 |       |        |       |        |       |        |        |        |
|          | 4  | 47.3%    |      |          | 3    | 47.3%    |        |          |                                                      |       |        |       |        |       |        |        |        |
| SGO_1856 | 17 | 35.8%    | 37   | 69.2%    | 12   | 22.9%    | 8      | 18.2%    | ATP-dependent proteinase ATP-binding chain           |       |        |       |        |       |        |        |        |
|          | 19 | 34.7%    | 26   | 54.8%    | 12   | 26.7%    | 4      | 9.8%     |                                                      |       |        |       |        |       |        |        |        |
| SGO_1857 | 4  | 11.3%    |      |          | 3    | 8.5%     |        |          | PTS system, IIABC components                         |       |        |       |        |       |        |        |        |
|          | 7  | 15.3%    |      |          |      |          |        |          |                                                      |       |        |       |        |       |        |        |        |
| SGO_1858 |    |          | 4    | 17.8%    | 5    | 17.6%    |        |          | beta-fructofuranosidase/sucrose 6 phoshate hydrolase |       |        |       |        |       |        |        |        |
|          | 3  | 9.3%     | 5    | 16.7%    | 5    | 19.6%    |        |          |                                                      |       |        |       |        |       |        |        |        |
| SGO_1860 | 10 | 47.4%    | 17   | 61.8%    | 11   | 48.1%    | 7      | 41.4%    | 5'-nucleotidase, lipoprotein e(P4) family            |       |        |       |        |       |        |        |        |
|          | 14 | 55.8%    | 13   | 55.8%    | 9    | 47.0%    | 5      | 29.5%    |                                                      |       |        |       |        |       |        |        |        |
| SGO_1861 | 3  | 23.4%    |      |          | 4    | 40.1%    |        |          | nusB; transcription antitermination factor NusB      |       |        |       |        |       |        |        |        |
|          |    |          |      |          | 4    | 40.1%    | 3      | 23.4%    |                                                      |       |        |       |        |       |        |        |        |
| SGO_1862 | 3  | 40.3%    | 4    | 46.5%    | 3    | 38.8%    | 3      | 40.3%    | alkaline shock protein                               |       |        |       |        |       |        |        |        |
|          | 3  | 40.3%    | 5    | 63.6%    | 3    | 38.8%    | 4      | 47.3%    |                                                      |       |        |       |        |       |        |        |        |
| SGO_1863 | 8  | 58.1%    | 7    | 61.3%    | 7    | 50.5%    | 6      | 41.4%    | efp; Elongation factor P (EF-P)                      |       |        |       |        |       |        |        |        |
|          | 8  | 58.1%    | 5    | 46.2%    | 8    | 66.1%    | 6      | 41.4%    |                                                      |       |        |       |        |       |        |        |        |
| SGO_1864 | 10 | 46.2%    | 13   | 58.4%    | 10   | 43.1%    | 6      | 25.2%    | X-Pro aminopeptidase                                 |       |        |       |        |       |        |        |        |
|          | 13 | 51.6%    | 13   | 63.7%    | 10   | 52.7%    | 6      | 25.2%    |                                                      |       |        |       |        |       |        |        |        |

 Show detected proteins only Show all proteins Filter by category:

ABC Transporter

Proteins found:

1179

Dot Plots Dot Plots

Summary Table

SgFn vs Sg

SgPg vs Sg

SgPgFn vs Sg

SgPg vs SgFn

SgPgFn vs SgFn

SgPgFn vs SgPg

Coverage

| Protein  | <i>Sg</i> |          | <i>SgFn</i> |          | <i>SgPg</i> |          | <i>SgPgFn</i> |          | Description                                           | <i>Sg</i> |        | <i>SgFn</i> |        | <i>SgPg</i> |        | <i>SgPgFn</i> |        |
|----------|-----------|----------|-------------|----------|-------------|----------|---------------|----------|-------------------------------------------------------|-----------|--------|-------------|--------|-------------|--------|---------------|--------|
|          | n         | Coverage | n           | Coverage | n           | Coverage | n             | Coverage |                                                       | Rep I     | Rep II | Rep I       | Rep II | Rep I       | Rep II | Rep I         | Rep II |
| SGO_1865 | 26        | 35.1%    | 15          | 28.7%    | 17          | 29.2%    | 8             | 16.5%    | uvrA; excinuclease ABC, A subunit                     |           |        |             |        |             |        |               |        |
|          | 30        | 43.4%    | 14          | 28.2%    | 20          | 35.9%    | 8             | 16.3%    |                                                       |           |        |             |        |             |        |               |        |
| SGO_1866 |           |          |             |          | 3           | 11.1%    | 3             | 8.3%     | corA; magnesium and cobalt transporter                |           |        |             |        |             |        |               |        |
| SGO_1867 | 5         | 23.2%    | 3           | 15.6%    | 4           | 22.8%    | 3             | 20.1%    | hypothetical protein SGO_1867                         |           |        |             |        |             |        |               |        |
|          | 5         | 23.2%    | 4           | 22.8%    | 4           | 22.8%    | 4             | 22.8%    |                                                       |           |        |             |        |             |        |               |        |
| SGO_1869 | 9         | 29.8%    |             |          |             |          |               |          | hypothetical protein SGO_1869                         |           |        |             |        |             |        |               |        |
|          | 13        | 46.3%    |             |          |             |          |               |          |                                                       |           |        |             |        |             |        |               |        |
| SGO_1870 | 14        | 28.8%    |             |          | 4           | 8.9%     |               |          | hypothetical protein SGO_1870                         |           |        |             |        |             |        |               |        |
|          | 16        | 34.4%    |             |          | 3           | 6.3%     |               |          |                                                       |           |        |             |        |             |        |               |        |
| SGO_1871 | 11        | 34.0%    |             |          |             |          |               |          | lipoprotein, putative                                 |           |        |             |        |             |        |               |        |
|          | 11        | 34.3%    |             |          |             |          |               |          |                                                       |           |        |             |        |             |        |               |        |
| SGO_1872 | 6         | 25.1%    |             |          | 5           | 21.0%    |               |          | hypothetical protein SGO_1872                         |           |        |             |        |             |        |               |        |
|          | 11        | 40.2%    |             |          |             |          |               |          |                                                       |           |        |             |        |             |        |               |        |
| SGO_1878 | 3         | 20.6%    |             |          |             |          |               |          | transcriptional regulator, TetR family domain protein |           |        |             |        |             |        |               |        |
|          | 3         | 17.2%    | 4           | 29.9%    |             |          |               |          |                                                       |           |        |             |        |             |        |               |        |
| SGO_1879 | 7         | 44.3%    | 4           | 43.0%    | 5           | 41.8%    | 3             | 31.6%    | rpsR; ribosomal protein S18                           |           |        |             |        |             |        |               |        |
|          | 7         | 44.3%    | 7           | 59.5%    | 6           | 41.8%    | 5             | 44.3%    |                                                       |           |        |             |        |             |        |               |        |
| SGO_1880 | 8         | 79.8%    | 7           | 69.3%    | 8           | 79.8%    | 8             | 79.8%    | ssb-1; single-strand binding protein                  |           |        |             |        |             |        |               |        |
|          | 8         | 79.8%    | 6           | 57.1%    | 8           | 79.8%    | 7             | 73.0%    |                                                       |           |        |             |        |             |        |               |        |
| SGO_1881 | 7         | 74.0%    | 8           | 76.0%    | 8           | 74.0%    | 8             | 78.1%    | rpsF; ribosomal protein S6                            |           |        |             |        |             |        |               |        |
|          | 8         | 82.3%    | 9           | 78.1%    | 7           | 72.9%    | 8             | 74.0%    |                                                       |           |        |             |        |             |        |               |        |
| SGO_1882 | 3         | 19.8%    | 4           | 20.3%    | 4           | 20.3%    | 3             | 19.8%    | foIE; GTP cyclohydrolase I                            |           |        |             |        |             |        |               |        |
|          | 5         | 46.0%    | 5           | 40.1%    | 4           | 20.3%    | 4             | 25.1%    |                                                       |           |        |             |        |             |        |               |        |

 Show detected proteins only Show all proteins Filter by category:

ABC Transporter

Proteins found:

1179

Dot Plots Dot Plots

Summary Table

SgFn vs Sg

SgPg vs Sg

SgPgFn vs Sg

SgPg vs SgFn

SgPgFn vs SgFn

SgPgFn vs SgPg

Coverage

Sg

SgFn

SgPg

SgPgFn

Description

Sg

SgFn

SgPg

SgPgFn

Protein

n Coverage

n Coverage

n Coverage

n Coverage

Rep I Rep II

Rep I Rep II

Rep I Rep II

Rep I Rep II

| Protein  | Sg |          | SgFn |          | SgPg |          | SgPgFn |          | Description                                                     | Sg    |        | SgFn  |        | SgPg  |        | SgPgFn |        |
|----------|----|----------|------|----------|------|----------|--------|----------|-----------------------------------------------------------------|-------|--------|-------|--------|-------|--------|--------|--------|
|          | n  | Coverage | n    | Coverage | n    | Coverage | n      | Coverage |                                                                 | Rep I | Rep II | Rep I | Rep II | Rep I | Rep II | Rep I  | Rep II |
| SGO_1884 | 6  | 30.6%    |      |          |      |          |        |          | hypothetical protein SGO_1884                                   |       |        |       |        |       |        |        |        |
|          | 8  | 43.3%    |      |          |      |          |        |          |                                                                 |       |        |       |        |       |        |        |        |
| SGO_1885 | 30 | 60.7%    | 40   | 73.5%    | 29   | 63.5%    | 25     | 56.7%    | groL; 60 kDa chaperonin/groEL protein                           |       |        |       |        |       |        |        |        |
|          | 36 | 65.2%    | 35   | 75.4%    | 34   | 70.6%    | 24     | 61.1%    |                                                                 |       |        |       |        |       |        |        |        |
| SGO_1886 | 4  | 54.8%    | 4    | 54.8%    | 4    | 54.8%    | 3      | 41.9%    | groES; chaperonin, 10 kDa                                       |       |        |       |        |       |        |        |        |
|          | 4  | 54.8%    | 4    | 51.6%    | 3    | 41.9%    | 3      | 41.9%    |                                                                 |       |        |       |        |       |        |        |        |
| SGO_1887 | 3  | 13.9%    |      |          |      |          |        |          | ABC transporter, ATP-binding protein                            |       |        |       |        |       |        |        |        |
|          | 7  | 29.6%    |      |          |      |          |        |          |                                                                 |       |        |       |        |       |        |        |        |
| SGO_1888 | 5  | 11.6%    |      |          |      |          |        |          | ABC transporter, permease protein                               |       |        |       |        |       |        |        |        |
|          | 7  | 12.8%    |      |          |      |          |        |          |                                                                 |       |        |       |        |       |        |        |        |
| SGO_1890 | 3  | 11.2%    |      |          |      |          |        |          | PTS system, fructose(mannose)-specific IID                      |       |        |       |        |       |        |        |        |
|          | 3  | 11.2%    |      |          |      |          |        |          |                                                                 |       |        |       |        |       |        |        |        |
| SGO_1891 | 3  | 13.8%    |      |          |      |          |        |          | PTS system, IIC component                                       |       |        |       |        |       |        |        |        |
|          | 4  | 24.7%    |      |          |      |          |        |          |                                                                 |       |        |       |        |       |        |        |        |
| SGO_1892 | 5  | 52.4%    | 7    | 56.1%    | 5    | 52.4%    | 5      | 52.4%    | PTS system, fructose(mannose)-specific IIB                      |       |        |       |        |       |        |        |        |
|          | 6  | 56.1%    | 6    | 59.8%    | 5    | 52.4%    | 4      | 42.7%    |                                                                 |       |        |       |        |       |        |        |        |
| SGO_1894 | 3  | 12.4%    |      |          |      |          |        |          | sugar-binding cell envelope protein                             |       |        |       |        |       |        |        |        |
|          | 7  | 27.4%    |      |          |      |          |        |          |                                                                 |       |        |       |        |       |        |        |        |
| SGO_1895 | 3  | 15.0%    |      |          |      |          |        |          | response regulator                                              |       |        |       |        |       |        |        |        |
|          | 3  | 14.5%    |      |          |      |          |        |          |                                                                 |       |        |       |        |       |        |        |        |
| SGO_1897 | 3  | 12.9%    |      |          |      |          |        |          | rbsB; ribose ABC transporter (ribose-binding component) CAC1453 |       |        |       |        |       |        |        |        |
|          | 6  | 22.7%    |      |          |      |          |        |          |                                                                 |       |        |       |        |       |        |        |        |
| SGO_1898 | 9  | 40.6%    | 15   | 71.3%    | 13   | 63.4%    | 11     | 49.9%    | glutamyl aminopeptidase                                         |       |        |       |        |       |        |        |        |
|          | 10 | 49.3%    | 17   | 70.1%    | 13   | 63.4%    | 9      | 40.6%    |                                                                 |       |        |       |        |       |        |        |        |

 Show detected proteins only Show all proteins

Proteins found:

1179

 Filter by category:

ABC Transporter

Dot Plots Dot Plots

Summary Table

SgFn vs Sg

SgPg vs Sg

SgPgFn vs Sg

SgPg vs SgFn

SgPgFn vs SgFn

SgPgFn vs SgPg

Coverage

Sg

SgFn

SgPg

SgPgFn

Description

Sg

SgFn

SgPg

SgPgFn

Protein

n Coverage

n Coverage

n Coverage

n Coverage

Rep I Rep II

Rep I Rep II

Rep I Rep II

Rep I Rep II

| Protein  | Sg |          | SgFn |          | SgPg |          | SgPgFn |          | Description                              | Sg    |        | SgFn  |        | SgPg  |        | SgPgFn |        |
|----------|----|----------|------|----------|------|----------|--------|----------|------------------------------------------|-------|--------|-------|--------|-------|--------|--------|--------|
|          | n  | Coverage | n    | Coverage | n    | Coverage | n      | Coverage |                                          | Rep I | Rep II | Rep I | Rep II | Rep I | Rep II | Rep I  | Rep II |
| SGO_1899 | 3  | 30.5%    |      |          |      |          |        |          | hypothetical protein SGO_1899            |       |        |       |        |       |        |        |        |
| SGO_1900 |    |          |      |          | 3    | 36.2%    |        |          | thioredoxin family protein               |       |        |       |        |       |        |        |        |
|          | 4  | 48.6%    |      |          | 3    | 43.8%    |        |          |                                          |       |        |       |        |       |        |        |        |
| SGO_1901 | 6  | 36.1%    | 4    | 22.6%    | 7    | 44.7%    | 5      | 31.7%    | tRNA binding domain                      |       |        |       |        |       |        |        |        |
|          | 5  | 31.7%    | 5    | 26.4%    | 7    | 36.1%    | 5      | 30.3%    |                                          |       |        |       |        |       |        |        |        |
| SGO_1902 | 5  | 57.3%    |      |          | 6    | 59.5%    | 6      | 59.5%    | ssb; single-stranded DNA-binding protein |       |        |       |        |       |        |        |        |
|          | 6  | 64.1%    |      |          | 6    | 59.5%    | 6      | 59.5%    |                                          |       |        |       |        |       |        |        |        |
| SGO_1903 | 17 | 39.1%    | 25   | 50.0%    | 20   | 46.4%    | 15     | 44.2%    | ATP-dependent Zn protease                |       |        |       |        |       |        |        |        |
|          | 19 | 39.3%    | 20   | 49.0%    | 23   | 52.8%    | 13     | 39.5%    |                                          |       |        |       |        |       |        |        |        |
| SGO_1907 |    |          |      |          |      |          |        |          | sensor protein                           |       |        |       |        |       |        |        |        |
|          | 3  | 15.7%    |      |          |      |          |        |          |                                          |       |        |       |        |       |        |        |        |
| SGO_1912 | 3  | 20.4%    |      |          | 5    | 29.3%    |        |          | Bifunctional folate synthesis protein    |       |        |       |        |       |        |        |        |
|          | 4  | 27.4%    | 4    | 25.6%    | 3    | 20.7%    |        |          |                                          |       |        |       |        |       |        |        |        |
| SGO_1914 |    |          | 4    | 15.0%    | 3    | 14.6%    |        |          | folP; dihydropteroate synthase           |       |        |       |        |       |        |        |        |
|          | 4  | 15.6%    | 5    | 21.2%    | 4    | 18.1%    | 3      | 11.8%    |                                          |       |        |       |        |       |        |        |        |
| SGO_1916 | 19 | 61.4%    | 13   | 41.4%    | 19   | 61.4%    | 14     | 48.0%    | ackA; acetate kinase                     |       |        |       |        |       |        |        |        |
|          | 19 | 60.6%    | 13   | 47.7%    | 21   | 68.7%    | 12     | 46.7%    |                                          |       |        |       |        |       |        |        |        |
| SGO_1917 | 3  | 17.7%    | 3    | 18.6%    | 6    | 37.5%    | 5      | 29.3%    | hypothetical protein SGO_1917            |       |        |       |        |       |        |        |        |
|          | 4  | 20.5%    | 6    | 34.4%    | 6    | 37.5%    | 3      | 18.9%    |                                          |       |        |       |        |       |        |        |        |
| SGO_1923 | 5  | 17.2%    |      |          |      |          |        |          | comYB; competence protein                |       |        |       |        |       |        |        |        |
| SGO_1924 | 17 | 54.9%    |      |          | 11   | 41.1%    | 7      | 23.5%    | comYA; competence protein comYA          |       |        |       |        |       |        |        |        |
|          | 16 | 54.9%    |      |          | 9    | 34.5%    | 5      | 15.4%    |                                          |       |        |       |        |       |        |        |        |

 Show detected proteins only Show all proteins

Proteins found:

1179

 Filter by category:

ABC Transporter

Dot Plots Dot Plots

Summary Table

SgFn vs Sg

SgPg vs Sg

SgPgFn vs Sg

SgPg vs SgFn

SgPgFn vs SgFn

SgPgFn vs SgPg

Coverage

| Sg |          | SgFn |          | SgPg |          | SgPgFn |          |
|----|----------|------|----------|------|----------|--------|----------|
| n  | Coverage | n    | Coverage | n    | Coverage | n      | Coverage |

Description

| Sg    |        | SgFn  |        | SgPg  |        | SgPgFn |        |
|-------|--------|-------|--------|-------|--------|--------|--------|
| Rep I | Rep II | Rep I | Rep II | Rep I | Rep II | Rep I  | Rep II |

| Protein  | Sg |          | SgFn |          | SgPg |          | SgPgFn |          | Description                                              | Sg    |        | SgFn  |        | SgPg  |        | SgPgFn |        |
|----------|----|----------|------|----------|------|----------|--------|----------|----------------------------------------------------------|-------|--------|-------|--------|-------|--------|--------|--------|
|          | n  | Coverage | n    | Coverage | n    | Coverage | n      | Coverage |                                                          | Rep I | Rep II | Rep I | Rep II | Rep I | Rep II | Rep I  | Rep II |
| SGO_1926 | 55 | 49.6%    | 51   | 52.1%    | 69   | 57.5%    | 55     | 48.3%    | rpoC; DNA-directed RNA polymerase, beta chain            |       |        |       |        |       |        |        |        |
|          | 69 | 57.0%    | 56   | 57.9%    | 73   | 62.6%    | 55     | 50.3%    |                                                          |       |        |       |        |       |        |        |        |
| SGO_1927 | 50 | 53.6%    | 44   | 55.0%    | 61   | 63.4%    | 44     | 52.1%    | rpoB; DNA-directed RNA polymerase, beta subunit          |       |        |       |        |       |        |        |        |
|          | 53 | 54.5%    | 37   | 49.8%    | 57   | 63.7%    | 43     | 51.9%    |                                                          |       |        |       |        |       |        |        |        |
| SGO_1928 | 27 | 36.4%    |      |          | 9    | 17.0%    | 5      | 10.4%    | pbp1b; penicillin-binding protein 1B                     |       |        |       |        |       |        |        |        |
|          | 30 | 42.4%    |      |          | 12   | 24.0%    |        |          |                                                          |       |        |       |        |       |        |        |        |
| SGO_1929 | 11 | 37.6%    | 17   | 56.2%    | 19   | 56.0%    | 13     | 41.6%    | tyrS; tyrosyl-tRNA synthetase                            |       |        |       |        |       |        |        |        |
|          | 16 | 40.2%    | 16   | 57.4%    | 21   | 60.3%    | 13     | 46.7%    |                                                          |       |        |       |        |       |        |        |        |
| SGO_1930 | 4  | 15.2%    |      |          | 3    | 12.1%    |        |          | rrmA; Ribosomal RNA large subunit methyltransferase A    |       |        |       |        |       |        |        |        |
|          | 6  | 24.5%    |      |          | 3    | 12.1%    |        |          |                                                          |       |        |       |        |       |        |        |        |
| SGO_1931 |    |          |      |          | 3    | 30.9%    |        |          | lipoprotein, putative                                    |       |        |       |        |       |        |        |        |
| SGO_1934 | 11 | 26.9%    |      |          |      |          |        |          | copper-translocating P-type ATPase                       |       |        |       |        |       |        |        |        |
|          | 14 | 32.5%    |      |          |      |          | 3      | 5.4%     |                                                          |       |        |       |        |       |        |        |        |
| SGO_1935 | 5  | 49.0%    |      |          |      |          |        |          | negative transcriptional regulator, CopY                 |       |        |       |        |       |        |        |        |
|          | 3  | 27.3%    |      |          |      |          |        |          |                                                          |       |        |       |        |       |        |        |        |
| SGO_1936 | 25 | 58.2%    | 8    | 24.2%    | 18   | 50.8%    | 5      | 16.2%    | adcA; metal-binding (Mn) permease precursor, lipoprotein |       |        |       |        |       |        |        |        |
|          | 35 | 65.6%    | 8    | 24.8%    | 15   | 41.2%    | 6      | 18.2%    |                                                          |       |        |       |        |       |        |        |        |
| SGO_1938 | 6  | 43.2%    |      |          | 3    | 22.9%    |        |          | adcC; ATP-binding protein, Mn                            |       |        |       |        |       |        |        |        |
|          | 8  | 48.3%    |      |          | 3    | 22.9%    |        |          |                                                          |       |        |       |        |       |        |        |        |
| SGO_1939 |    |          |      |          | 4    | 30.6%    |        |          | adcR; repressor protein adcR                             |       |        |       |        |       |        |        |        |
| SGO_1957 | 8  | 30.8%    | 4    | 12.0%    |      |          |        |          | hypothetical protein SGO_1957                            |       |        |       |        |       |        |        |        |
|          | 12 | 41.3%    | 6    | 19.5%    | 3    | 13.4%    |        |          |                                                          |       |        |       |        |       |        |        |        |

- Show detected proteins only  
 Show all proteins

Proteins found:  
1179

Filter by category:

ABC Transporter

Dot Plots Dot Plots

Summary Table

SgFn vs Sg

SgPg vs Sg

SgPgFn vs Sg

SgPg vs SgFn

SgPgFn vs SgFn

SgPgFn vs SgPg

Coverage

| Sg |          | SgFn |          | SgPg |          | SgPgFn |          |
|----|----------|------|----------|------|----------|--------|----------|
| n  | Coverage | n    | Coverage | n    | Coverage | n      | Coverage |

Description

| Sg    |        | SgFn  |        | SgPg  |        | SgPgFn |        |
|-------|--------|-------|--------|-------|--------|--------|--------|
| Rep I | Rep II | Rep I | Rep II | Rep I | Rep II | Rep I  | Rep II |

| Protein  | Sg |          | SgFn |          | SgPg |          | SgPgFn |          | Description                                        | Sg    |        | SgFn  |        | SgPg  |        | SgPgFn |        |
|----------|----|----------|------|----------|------|----------|--------|----------|----------------------------------------------------|-------|--------|-------|--------|-------|--------|--------|--------|
|          | n  | Coverage | n    | Coverage | n    | Coverage | n      | Coverage |                                                    | Rep I | Rep II | Rep I | Rep II | Rep I | Rep II | Rep I  | Rep II |
| SGO_1958 | 5  | 47.7%    | 5    | 47.7%    | 6    | 48.4%    | 6      | 54.7%    | rplQ; ribosomal protein L17                        |       |        |       |        |       |        |        |        |
|          | 7  | 54.7%    | 5    | 51.6%    | 6    | 48.4%    | 5      | 47.7%    |                                                    |       |        |       |        |       |        |        |        |
| SGO_1959 | 17 | 50.3%    | 20   | 59.0%    | 20   | 68.3%    | 15     | 54.8%    | rpoA; DNA-directed RNA polymerase, alpha subunit   |       |        |       |        |       |        |        |        |
|          | 19 | 55.8%    | 15   | 56.7%    | 19   | 62.2%    | 18     | 63.5%    |                                                    |       |        |       |        |       |        |        |        |
| SGO_1960 | 3  | 22.8%    | 4    | 33.9%    | 5    | 50.4%    | 4      | 33.9%    | rpsK; ribosomal protein S11                        |       |        |       |        |       |        |        |        |
|          | 4  | 33.1%    | 5    | 47.2%    | 4    | 33.9%    | 3      | 22.8%    |                                                    |       |        |       |        |       |        |        |        |
| SGO_1961 | 16 | 69.4%    | 11   | 62.8%    | 17   | 69.4%    | 13     | 59.5%    | rpsM; ribosomal protein S13p/S18e                  |       |        |       |        |       |        |        |        |
|          | 16 | 69.4%    | 8    | 47.9%    | 14   | 69.4%    | 14     | 69.4%    |                                                    |       |        |       |        |       |        |        |        |
| SGO_1962 |    |          |      |          | 3    | 60.5%    | 3      | 60.5%    | rpmJ; ribosomal protein L36                        |       |        |       |        |       |        |        |        |
|          |    |          |      |          | 3    | 60.5%    |        |          |                                                    |       |        |       |        |       |        |        |        |
| SGO_1964 | 10 | 64.6%    | 13   | 62.7%    | 13   | 68.9%    | 12     | 67.9%    | adk; Adenylate kinase (ATP-AMP transphosphorylase) |       |        |       |        |       |        |        |        |
|          | 11 | 64.6%    | 11   | 62.3%    | 14   | 79.2%    | 9      | 58.0%    |                                                    |       |        |       |        |       |        |        |        |
| SGO_1965 | 8  | 20.2%    |      |          | 6    | 15.4%    | 3      | 8.5%     | Preprotein translocase secY subunit                |       |        |       |        |       |        |        |        |
|          | 9  | 20.6%    |      |          | 5    | 13.8%    | 3      | 8.5%     |                                                    |       |        |       |        |       |        |        |        |
| SGO_1966 | 6  | 49.3%    | 7    | 50.7%    | 7    | 50.7%    | 12     | 56.2%    | rplO; ribosomal protein L15                        |       |        |       |        |       |        |        |        |
|          | 5  | 28.8%    | 5    | 47.3%    | 8    | 50.7%    | 9      | 50.7%    |                                                    |       |        |       |        |       |        |        |        |
| SGO_1967 | 4  | 54.1%    | 3    | 54.1%    | 4    | 54.1%    | 5      | 54.1%    | 50S ribosomal protein L30 -related protein         |       |        |       |        |       |        |        |        |
|          | 4  | 54.1%    | 3    | 35.1%    | 4    | 54.1%    | 4      | 54.1%    |                                                    |       |        |       |        |       |        |        |        |
| SGO_1968 | 11 | 65.9%    | 8    | 60.4%    | 10   | 71.3%    | 12     | 72.0%    | rpsE; ribosomal protein S5                         |       |        |       |        |       |        |        |        |
|          | 12 | 67.1%    | 9    | 76.2%    | 11   | 71.3%    | 11     | 72.0%    |                                                    |       |        |       |        |       |        |        |        |
| SGO_1969 | 4  | 39.8%    | 4    | 39.8%    | 4    | 39.8%    | 5      | 47.5%    | rplR; ribosomal protein L18                        |       |        |       |        |       |        |        |        |
|          | 5  | 50.0%    | 4    | 39.8%    | 4    | 39.8%    | 4      | 39.8%    |                                                    |       |        |       |        |       |        |        |        |
| SGO_1970 | 9  | 59.6%    | 12   | 71.9%    | 9    | 59.6%    | 9      | 59.6%    | BL10; 50S ribosomal protein L6                     |       |        |       |        |       |        |        |        |
|          | 10 | 65.7%    | 6    | 49.4%    | 11   | 66.3%    | 8      | 59.6%    |                                                    |       |        |       |        |       |        |        |        |

- Show detected proteins only  
 Show all proteins

Proteins found:  
1179

Filter by category:

ABC Transporter

Dot Plots Dot Plots

Summary Table SgFn vs Sg SgPg vs Sg SgPgFn vs Sg SgPg vs SgFn SgPgFn vs SgFn SgPgFn vs SgPg Coverage

| Protein  | Sg |          | SgFn |          | SgPg |          | SgPgFn |          | Description                       | Sg    |        | SgFn  |        | SgPg  |        | SgPgFn |        |
|----------|----|----------|------|----------|------|----------|--------|----------|-----------------------------------|-------|--------|-------|--------|-------|--------|--------|--------|
|          | n  | Coverage | n    | Coverage | n    | Coverage | n      | Coverage |                                   | Rep I | Rep II | Rep I | Rep II | Rep I | Rep II | Rep I  | Rep II |
| SGO_1971 | 12 | 59.8%    | 13   | 59.8%    | 12   | 58.3%    | 12     | 58.3%    | rpsH; ribosomal protein S8        |       |        |       |        |       |        |        |        |
|          | 12 | 59.8%    | 10   | 50.0%    | 13   | 59.8%    | 11     | 58.3%    |                                   |       |        |       |        |       |        |        |        |
| SGO_1972 |    |          |      |          |      |          |        |          | rpsN; ribosomal protein S14p/S29e |       |        |       |        |       |        |        |        |
|          | 3  | 49.2%    |      |          |      |          |        |          |                                   |       |        |       |        |       |        |        |        |
| SGO_1973 | 18 | 83.9%    | 15   | 70.6%    | 16   | 80.6%    | 14     | 77.2%    | BL6; 50S ribosomal protein L5     |       |        |       |        |       |        |        |        |
|          | 17 | 81.7%    | 15   | 88.3%    | 17   | 78.3%    | 15     | 75.0%    |                                   |       |        |       |        |       |        |        |        |
| SGO_1974 | 8  | 47.5%    | 9    | 63.4%    | 9    | 52.5%    | 8      | 47.5%    | rplX; ribosomal protein L24       |       |        |       |        |       |        |        |        |
|          | 9  | 63.4%    | 6    | 54.5%    | 9    | 52.5%    | 8      | 47.5%    |                                   |       |        |       |        |       |        |        |        |
| SGO_1975 | 4  | 27.0%    | 4    | 22.1%    | 5    | 34.4%    | 5      | 32.0%    | rplN; ribosomal protein L14       |       |        |       |        |       |        |        |        |
|          | 6  | 36.1%    | 4    | 22.1%    | 4    | 27.0%    | 5      | 32.0%    |                                   |       |        |       |        |       |        |        |        |
| SGO_1976 | 4  | 25.6%    | 3    | 25.6%    | 5    | 38.4%    | 5      | 38.4%    | BS16; 30S ribosomal protein       |       |        |       |        |       |        |        |        |
|          | 4  | 25.6%    | 6    | 53.5%    | 6    | 58.1%    | 5      | 38.4%    |                                   |       |        |       |        |       |        |        |        |
| SGO_1977 | 4  | 42.6%    | 4    | 50.0%    | 5    | 45.6%    | 4      | 57.4%    | rpmC; ribosomal protein L29       |       |        |       |        |       |        |        |        |
|          | 8  | 73.5%    |      |          | 5    | 58.8%    | 3      | 50.0%    |                                   |       |        |       |        |       |        |        |        |
| SGO_1978 | 4  | 33.6%    | 6    | 42.3%    | 6    | 44.5%    | 4      | 33.6%    | rplP; ribosomal protein L16       |       |        |       |        |       |        |        |        |
|          | 8  | 52.6%    | 4    | 40.1%    | 6    | 44.5%    | 4      | 37.2%    |                                   |       |        |       |        |       |        |        |        |
| SGO_1979 | 12 | 55.8%    | 14   | 58.1%    | 11   | 53.9%    | 10     | 49.8%    | rpsC; ribosomal protein S3        |       |        |       |        |       |        |        |        |
|          | 14 | 59.4%    | 13   | 69.6%    | 10   | 53.5%    | 9      | 53.9%    |                                   |       |        |       |        |       |        |        |        |
| SGO_1980 | 8  | 58.8%    | 6    | 50.9%    | 7    | 57.0%    | 6      | 54.4%    | rplV; ribosomal protein L22       |       |        |       |        |       |        |        |        |
|          | 9  | 69.3%    | 5    | 49.1%    | 8    | 61.4%    | 7      | 60.5%    |                                   |       |        |       |        |       |        |        |        |
| SGO_1981 | 8  | 57.0%    | 8    | 48.4%    | 8    | 57.0%    | 6      | 55.9%    | rpsS; ribosomal protein S19       |       |        |       |        |       |        |        |        |
|          | 9  | 58.1%    | 10   | 64.5%    | 9    | 57.0%    | 8      | 57.0%    |                                   |       |        |       |        |       |        |        |        |
| SGO_1982 | 10 | 47.3%    | 10   | 52.0%    | 11   | 56.0%    | 10     | 50.2%    | rplB; ribosomal protein L2        |       |        |       |        |       |        |        |        |
|          | 12 | 52.7%    | 11   | 54.2%    | 11   | 45.5%    | 12     | 56.0%    |                                   |       |        |       |        |       |        |        |        |

Show detected proteins only  
 Show all proteins  
 Filter by category:

Proteins found: 1179

Dot Plots Dot Plots

Summary Table

SgFn vs Sg

SgPg vs Sg

SgPgFn vs Sg

SgPg vs SgFn

SgPgFn vs SgFn

SgPgFn vs SgPg

Coverage

| Protein  | <i>Sg</i> |          | <i>SgFn</i> |          | <i>SgPg</i> |          | <i>SgPgFn</i> |          | Description                                                      | <i>Sg</i> |        | <i>SgFn</i> |        | <i>SgPg</i> |        | <i>SgPgFn</i> |        |
|----------|-----------|----------|-------------|----------|-------------|----------|---------------|----------|------------------------------------------------------------------|-----------|--------|-------------|--------|-------------|--------|---------------|--------|
|          | n         | Coverage | n           | Coverage | n           | Coverage | n             | Coverage |                                                                  | Rep I     | Rep II | Rep I       | Rep II | Rep I       | Rep II | Rep I         | Rep II |
| SGO_1983 | 7         | 69.4%    | 6           | 59.2%    | 8           | 69.4%    | 7             | 69.4%    | rplW; ribosomal protein L23                                      |           |        |             |        |             |        |               |        |
|          | 9         | 84.7%    | 6           | 68.4%    | 7           | 69.4%    | 8             | 76.5%    |                                                                  |           |        |             |        |             |        |               |        |
| SGO_1984 | 7         | 37.7%    | 9           | 47.8%    | 8           | 51.7%    | 7             | 51.7%    | rplD; ribosomal protein L4/L1 family                             |           |        |             |        |             |        |               |        |
|          | 8         | 41.5%    | 9           | 49.8%    | 8           | 51.7%    | 7             | 51.7%    |                                                                  |           |        |             |        |             |        |               |        |
| SGO_1985 | 8         | 45.2%    | 11          | 63.9%    | 9           | 53.8%    | 10            | 59.6%    | rplC; ribosomal protein L3                                       |           |        |             |        |             |        |               |        |
|          | 10        | 48.1%    | 10          | 64.9%    | 10          | 56.7%    | 10            | 59.6%    |                                                                  |           |        |             |        |             |        |               |        |
| SGO_1986 | 5         | 38.2%    | 5           | 38.2%    | 5           | 38.2%    | 6             | 45.1%    | rpsJ; ribosomal protein S10                                      |           |        |             |        |             |        |               |        |
|          | 5         | 38.2%    | 5           | 45.1%    | 5           | 38.2%    | 6             | 45.1%    |                                                                  |           |        |             |        |             |        |               |        |
| SGO_1988 | 6         | 26.6%    |             |          |             |          |               |          | hydrolase, haloacid dehalogenase-like family                     |           |        |             |        |             |        |               |        |
|          | 6         | 25.7%    | 5           | 20.6%    |             |          |               |          |                                                                  |           |        |             |        |             |        |               |        |
| SGO_1989 | 25        | 67.0%    | 24          | 61.9%    | 31          | 69.5%    | 26            | 67.0%    | purA; adenylosuccinate synthetase                                |           |        |             |        |             |        |               |        |
|          | 26        | 67.2%    | 25          | 63.3%    | 29          | 65.8%    | 26            | 66.7%    |                                                                  |           |        |             |        |             |        |               |        |
| SGO_1990 | 3         | 6.4%     | 10          | 23.7%    | 7           | 15.3%    | 4             | 8.7%     | glutamate--cysteine ligase, putative/amino acid ligase, putative |           |        |             |        |             |        |               |        |
|          | 7         | 10.9%    | 12          | 26.4%    | 8           | 19.8%    |               |          |                                                                  |           |        |             |        |             |        |               |        |
| SGO_1991 | 3         | 12.8%    | 6           | 23.1%    | 3           | 16.2%    |               |          | hslO; 33 kDa chaperonin /Heat shock protein 33-like protein      |           |        |             |        |             |        |               |        |
|          | 8         | 32.4%    | 5           | 19.7%    | 4           | 19.7%    |               |          |                                                                  |           |        |             |        |             |        |               |        |
| SGO_1993 | 10        | 49.8%    | 6           | 35.6%    | 9           | 49.8%    | 3             | 22.4%    | possible transcriptional regulator                               |           |        |             |        |             |        |               |        |
|          | 14        | 70.3%    | 6           | 45.1%    | 8           | 49.8%    | 5             | 29.7%    |                                                                  |           |        |             |        |             |        |               |        |
| SGO_1994 | 3         | 25.9%    |             |          |             |          |               |          | lipoprotein, putative                                            |           |        |             |        |             |        |               |        |
| SGO_1995 | 4         | 16.0%    | 3           | 11.8%    |             |          | 3             | 13.4%    | MutT/nudix family protein                                        |           |        |             |        |             |        |               |        |
|          | 4         | 16.0%    | 4           | 22.1%    |             |          |               |          |                                                                  |           |        |             |        |             |        |               |        |
| SGO_1998 | 19        | 30.2%    | 13          | 20.6%    | 21          | 32.3%    | 10            | 17.2%    | clpB; ATP-dependent Clp proteinase, ATP-binding chain            |           |        |             |        |             |        |               |        |
|          | 24        | 32.6%    | 15          | 24.2%    | 23          | 34.7%    | 8             | 13.6%    |                                                                  |           |        |             |        |             |        |               |        |

 Show detected proteins only Show all proteins Filter by category:

ABC Transporter

Proteins found:

1179

Dot Plots Dot Plots



Summary Table

SgFn vs Sg

SgPg vs Sg

SgPgFn vs Sg

SgPg vs SgFn

SgPgFn vs SgFn

SgPgFn vs SgPg

Coverage

Sg

SgFn

SgPg

SgPgFn

Description

Sg

SgFn

SgPg

SgPgFn

Protein

n Coverage

n Coverage

n Coverage

n Coverage

Rep I Rep II

Rep I Rep II

Rep I Rep II

Rep I Rep II

| Protein  | Sg |          | SgFn |          | SgPg |          | SgPgFn |          | Description                                                 | Sg    |        | SgFn  |        | SgPg  |        | SgPgFn |        |
|----------|----|----------|------|----------|------|----------|--------|----------|-------------------------------------------------------------|-------|--------|-------|--------|-------|--------|--------|--------|
|          | n  | Coverage | n    | Coverage | n    | Coverage | n      | Coverage |                                                             | Rep I | Rep II | Rep I | Rep II | Rep I | Rep II | Rep I  | Rep II |
| SGO_2000 | 16 | 67.4%    | 17   | 68.6%    | 20   | 79.8%    | 16     | 66.9%    | tsf; translation elongation factor Ts                       |       |        |       |        |       |        |        |        |
|          | 16 | 67.4%    | 19   | 78.4%    | 18   | 78.1%    | 15     | 61.7%    |                                                             |       |        |       |        |       |        |        |        |
| SGO_2001 | 17 | 63.8%    | 23   | 69.2%    | 19   | 65.8%    | 19     | 66.9%    | rpsB; ribosomal protein S2                                  |       |        |       |        |       |        |        |        |
|          | 19 | 68.5%    | 23   | 80.8%    | 18   | 63.1%    | 20     | 69.2%    |                                                             |       |        |       |        |       |        |        |        |
| SGO_2004 | 20 | 41.9%    | 5    | 13.1%    |      |          |        |          | LPXTG cell wall surface protein                             |       |        |       |        |       |        |        |        |
|          | 25 | 41.3%    | 6    | 14.3%    |      |          |        |          |                                                             |       |        |       |        |       |        |        |        |
| SGO_2005 | 46 | 19.3%    |      |          | 5    | 1.8%     | 9      | 3.6%     | LPXTG cell wall surface protein                             |       |        |       |        |       |        |        |        |
|          | 54 | 21.0%    | 4    | 1.9%     | 5    | 2.3%     | 5      | 1.9%     |                                                             |       |        |       |        |       |        |        |        |
| SGO_2006 | 3  | 27.3%    |      |          |      |          |        |          | thioredoxin signature protein                               |       |        |       |        |       |        |        |        |
|          | 3  | 28.9%    |      |          |      |          |        |          |                                                             |       |        |       |        |       |        |        |        |
| SGO_2007 | 7  | 47.8%    | 8    | 56.7%    | 6    | 43.3%    | 5      | 36.5%    | nusG; transcription termination/antitermination factor NusG |       |        |       |        |       |        |        |        |
|          | 8  | 53.4%    | 7    | 48.9%    | 7    | 55.6%    | 7      | 47.8%    |                                                             |       |        |       |        |       |        |        |        |
| SGO_2008 | 3  | 31.0%    |      |          |      |          |        |          | preprotein translocase secE component -related protein      |       |        |       |        |       |        |        |        |
|          | 3  | 31.0%    |      |          |      |          |        |          |                                                             |       |        |       |        |       |        |        |        |
| SGO_2010 | 17 | 33.1%    | 6    | 17.3%    |      |          |        |          | pbp2a; penicillin-binding protein 2A                        |       |        |       |        |       |        |        |        |
|          | 17 | 33.2%    | 4    | 8.4%     |      |          |        |          |                                                             |       |        |       |        |       |        |        |        |
| SGO_2013 | 35 | 48.2%    | 5    | 6.0%     |      |          |        |          | putative N-acetylmuramidase/lysin                           |       |        |       |        |       |        |        |        |
|          | 40 | 53.4%    | 5    | 6.6%     |      |          |        |          |                                                             |       |        |       |        |       |        |        |        |
| SGO_2015 |    |          |      |          |      |          |        |          | possible polysaccharide transport protein                   |       |        |       |        |       |        |        |        |
|          | 3  | 6.4%     |      |          |      |          |        |          |                                                             |       |        |       |        |       |        |        |        |
| SGO_2016 |    |          |      |          |      |          |        |          | nucleotide sugar dehydratase, putative                      |       |        |       |        |       |        |        |        |
|          | 4  | 10.5%    |      |          |      |          |        |          |                                                             |       |        |       |        |       |        |        |        |
| SGO_2017 |    |          |      |          | 3    | 29.6%    |        |          | nucleotidyl transferase, putative                           |       |        |       |        |       |        |        |        |
|          | 5  | 41.3%    |      |          |      |          |        |          |                                                             |       |        |       |        |       |        |        |        |

- Show detected proteins only  
 Show all proteins

Proteins found:  
1179

Filter by category:

ABC Transporter

Dot Plots Dot Plots

Summary Table

SgFn vs Sg

SgPg vs Sg

SgPgFn vs Sg

SgPg vs SgFn

SgPgFn vs SgFn

SgPgFn vs SgPg

Coverage

Sg

SgFn

SgPg

SgPgFn

Description

Sg

SgFn

SgPg

SgPgFn

Protein

n Coverage

n Coverage

n Coverage

n Coverage

Rep I Rep II

Rep I Rep II

Rep I Rep II

Rep I Rep II

| Protein  | Sg |          | SgFn |          | SgPg |          | SgPgFn |          | Description                                               | Sg    |        | SgFn  |        | SgPg  |        | SgPgFn |        |
|----------|----|----------|------|----------|------|----------|--------|----------|-----------------------------------------------------------|-------|--------|-------|--------|-------|--------|--------|--------|
|          | n  | Coverage | n    | Coverage | n    | Coverage | n      | Coverage |                                                           | Rep I | Rep II | Rep I | Rep II | Rep I | Rep II | Rep I  | Rep II |
| SGO_2019 | 8  | 34.7%    |      |          | 6    | 22.6%    |        |          | licD; licD3 protein                                       |       |        |       |        |       |        |        |        |
|          | 9  | 38.2%    |      |          | 4    | 18.8%    |        |          |                                                           |       |        |       |        |       |        |        |        |
| SGO_2020 | 4  | 16.0%    |      |          |      |          |        |          | glycosyltransferase                                       |       |        |       |        |       |        |        |        |
|          |    |          |      |          |      |          |        |          |                                                           |       |        |       |        |       |        |        |        |
| SGO_2021 | 7  | 34.9%    |      |          |      |          |        |          | Extracellular polysaccharide glycosyltransferase          |       |        |       |        |       |        |        |        |
|          | 11 | 45.5%    |      |          |      |          |        |          |                                                           |       |        |       |        |       |        |        |        |
| SGO_2022 | 4  | 17.7%    |      |          |      |          |        |          | UDP-glucose 4-epimerase BH3715                            |       |        |       |        |       |        |        |        |
|          |    |          |      |          |      |          |        |          |                                                           |       |        |       |        |       |        |        |        |
| SGO_2023 | 7  | 33.3%    |      |          |      |          |        |          | galactosyltransferase                                     |       |        |       |        |       |        |        |        |
|          | 6  | 33.3%    |      |          |      |          |        |          |                                                           |       |        |       |        |       |        |        |        |
| SGO_2024 | 19 | 32.3%    |      |          | 10   | 18.9%    | 3      | 6.5%     | Extracellular polysaccharide biosynthesis                 |       |        |       |        |       |        |        |        |
|          | 24 | 38.8%    |      |          | 8    | 14.9%    | 4      | 10.0%    |                                                           |       |        |       |        |       |        |        |        |
| SGO_2025 | 13 | 60.2%    |      |          | 10   | 43.7%    | 3      | 16.9%    | wze; putative autophosphorylating protein tyrosine kinase |       |        |       |        |       |        |        |        |
|          | 12 | 54.5%    |      |          | 9    | 44.2%    | 5      | 28.6%    |                                                           |       |        |       |        |       |        |        |        |
| SGO_2026 | 5  | 31.6%    |      |          | 6    | 37.7%    |        |          | wzd; polysaccharide export protein, MPA1 family           |       |        |       |        |       |        |        |        |
|          | 6  | 31.6%    |      |          | 5    | 31.6%    |        |          |                                                           |       |        |       |        |       |        |        |        |
| SGO_2027 | 5  | 12.3%    |      |          |      |          |        |          | wzh; wzh/Putative phosphotyrosine-protein phosphatase     |       |        |       |        |       |        |        |        |
|          |    |          |      |          |      |          |        |          |                                                           |       |        |       |        |       |        |        |        |
| SGO_2028 | 12 | 29.8%    |      |          |      |          |        |          | wzg; transcriptional regulator                            |       |        |       |        |       |        |        |        |
|          | 13 | 31.5%    |      |          | 3    | 8.6%     |        |          |                                                           |       |        |       |        |       |        |        |        |
| SGO_2033 | 22 | 40.2%    | 23   | 39.0%    | 14   | 33.4%    | 7      | 17.7%    | nrdD; ribonucleoside-triphosphate reductase               |       |        |       |        |       |        |        |        |
|          | 31 | 48.2%    | 16   | 30.4%    | 14   | 31.9%    | 9      | 21.1%    |                                                           |       |        |       |        |       |        |        |        |
| SGO_2034 | 8  | 14.0%    | 3    | 7.1%     | 4    | 7.6%     |        |          | hypothetical protein SGO_2034                             |       |        |       |        |       |        |        |        |
|          | 11 | 19.3%    |      |          |      |          |        |          |                                                           |       |        |       |        |       |        |        |        |

 Show detected proteins only Show all proteins Filter by category:

ABC Transporter

Proteins found:

1179

Dot Plots Dot Plots

Summary Table

SgFn vs Sg

SgPg vs Sg

SgPgFn vs Sg

SgPg vs SgFn

SgPgFn vs SgFn

SgPgFn vs SgPg

Coverage

| Protein  | Sg |          | SgFn |          | SgPg |          | SgPgFn |          | Description                                                | Sg    |        | SgFn  |        | SgPg  |        | SgPgFn |        |
|----------|----|----------|------|----------|------|----------|--------|----------|------------------------------------------------------------|-------|--------|-------|--------|-------|--------|--------|--------|
|          | n  | Coverage | n    | Coverage | n    | Coverage | n      | Coverage |                                                            | Rep I | Rep II | Rep I | Rep II | Rep I | Rep II | Rep I  | Rep II |
| SGO_2037 | 8  | 21.0%    | 5    | 11.4%    |      |          |        |          | cardiolipin synthase                                       |       |        |       |        |       |        |        |        |
|          | 9  | 22.4%    | 6    | 14.0%    |      |          |        |          |                                                            |       |        |       |        |       |        |        |        |
| SGO_2039 | 5  | 16.7%    |      |          |      |          |        |          | dihydrofolate synthase                                     |       |        |       |        |       |        |        |        |
|          | 6  | 18.7%    |      |          | 3    | 8.7%     |        |          |                                                            |       |        |       |        |       |        |        |        |
| SGO_2041 | 4  | 33.8%    |      |          | 6    | 43.9%    | 3      | 23.0%    | conserved hypothetical protein TIGR00250                   |       |        |       |        |       |        |        |        |
|          | 5  | 38.1%    |      |          | 4    | 33.8%    |        |          |                                                            |       |        |       |        |       |        |        |        |
| SGO_2042 | 5  | 67.0%    | 5    | 68.2%    | 3    | 53.4%    | 4      | 63.6%    | Bacterial protein of unknown function (DUF965) superfamily |       |        |       |        |       |        |        |        |
|          | 4  | 63.6%    | 4    | 63.6%    | 3    | 53.4%    | 4      | 63.6%    |                                                            |       |        |       |        |       |        |        |        |
| SGO_2043 | 8  | 58.9%    |      |          |      |          |        |          | lipoprotein, putative                                      |       |        |       |        |       |        |        |        |
|          | 7  | 44.7%    |      |          | 3    | 21.6%    |        |          |                                                            |       |        |       |        |       |        |        |        |
| SGO_2045 | 18 | 52.2%    | 16   | 49.3%    | 18   | 53.3%    | 17     | 51.4%    | recA; recA protein                                         |       |        |       |        |       |        |        |        |
|          | 22 | 54.8%    | 13   | 41.0%    | 19   | 55.6%    | 17     | 54.3%    |                                                            |       |        |       |        |       |        |        |        |
| SGO_2046 | 7  | 19.9%    | 5    | 14.4%    | 4    | 10.0%    | 4      | 8.6%     | cinA; competence induced protein                           |       |        |       |        |       |        |        |        |
|          | 5  | 12.2%    | 5    | 10.0%    | 4    | 9.6%     | 4      | 9.8%     |                                                            |       |        |       |        |       |        |        |        |
| SGO_2049 |    |          |      |          |      |          |        |          | tagI; DNA-3-methyladenine glycosylase I                    |       |        |       |        |       |        |        |        |
|          | 3  | 29.3%    |      |          |      |          |        |          |                                                            |       |        |       |        |       |        |        |        |
| SGO_2050 | 5  | 37.2%    |      |          | 3    | 25.5%    |        |          | ruvA; Holliday junction DNA helicase RuvA                  |       |        |       |        |       |        |        |        |
|          | 3  | 17.3%    | 3    | 23.5%    | 4    | 26.0%    |        |          |                                                            |       |        |       |        |       |        |        |        |
| SGO_2052 |    |          |      |          |      |          |        |          | hypothetical protein SGO_2052                              |       |        |       |        |       |        |        |        |
|          | 4  | 25.4%    |      |          |      |          |        |          |                                                            |       |        |       |        |       |        |        |        |
| SGO_2053 | 9  | 20.2%    | 9    | 23.5%    | 5    | 13.8%    | 5      | 13.3%    | DNA mismatch repair protein hexB                           |       |        |       |        |       |        |        |        |
|          | 12 | 28.4%    | 6    | 14.4%    | 10   | 27.5%    | 7      | 17.3%    |                                                            |       |        |       |        |       |        |        |        |
| SGO_2056 | 15 | 20.2%    | 13   | 21.3%    | 11   | 21.4%    | 5      | 8.0%     | mutS; DNA mismatch repair protein MutS                     |       |        |       |        |       |        |        |        |
|          | 17 | 28.1%    | 18   | 31.5%    | 14   | 28.6%    | 10     | 22.6%    |                                                            |       |        |       |        |       |        |        |        |

 Show detected proteins only Show all proteins Filter by category:

ABC Transporter

Proteins found:

1179

Dot Plots Dot Plots

Summary Table

SgFn vs Sg

SgPg vs Sg

SgPgFn vs Sg

SgPg vs SgFn

SgPgFn vs SgFn

SgPgFn vs SgPg

Coverage

| Protein  | Sg |          | SgFn |          | SgPg |          | SgPgFn |          | Description                             | Sg    |        | SgFn  |        | SgPg  |        | SgPgFn |        |
|----------|----|----------|------|----------|------|----------|--------|----------|-----------------------------------------|-------|--------|-------|--------|-------|--------|--------|--------|
|          | n  | Coverage | n    | Coverage | n    | Coverage | n      | Coverage |                                         | Rep I | Rep II | Rep I | Rep II | Rep I | Rep II | Rep I  | Rep II |
| SGO_2057 | 7  | 59.3%    |      |          |      |          |        |          | argR; arginine repressor                |       |        |       |        |       |        |        |        |
|          | 6  | 49.0%    |      |          |      |          |        |          |                                         |       |        |       |        |       |        |        |        |
| SGO_2058 | 31 | 59.8%    | 39   | 69.4%    | 37   | 66.2%    | 25     | 56.6%    | argS; arginyl-tRNA synthetase           |       |        |       |        |       |        |        |        |
|          | 37 | 65.7%    | 36   | 70.5%    | 36   | 64.1%    | 24     | 52.0%    |                                         |       |        |       |        |       |        |        |        |
| SGO_2059 | 5  | 19.0%    |      |          |      |          |        |          | hypothetical protein SGO_2059           |       |        |       |        |       |        |        |        |
| SGO_2060 | 15 | 31.5%    | 12   | 28.1%    | 21   | 43.0%    | 8      | 16.6%    | aspS-1; aspartyl-tRNA synthetase        |       |        |       |        |       |        |        |        |
|          | 22 | 42.0%    | 15   | 37.0%    | 19   | 39.4%    | 8      | 19.7%    |                                         |       |        |       |        |       |        |        |        |
| SGO_2062 | 16 | 45.8%    | 19   | 63.1%    | 21   | 66.0%    | 14     | 37.1%    | hisS; histidyl-tRNA synthetase          |       |        |       |        |       |        |        |        |
|          | 17 | 48.6%    | 18   | 55.2%    | 20   | 62.4%    | 14     | 40.4%    |                                         |       |        |       |        |       |        |        |        |
| SGO_2064 | 16 | 40.0%    | 19   | 48.8%    | 22   | 54.0%    | 15     | 41.9%    | ilvD; dihydroxy-acid dehydratase        |       |        |       |        |       |        |        |        |
|          | 18 | 40.3%    | 18   | 47.7%    | 24   | 60.4%    | 14     | 40.3%    |                                         |       |        |       |        |       |        |        |        |
| SGO_2065 |    |          |      |          |      |          |        |          | rpmF; ribosomal protein L32             |       |        |       |        |       |        |        |        |
| SGO_2066 | 3  | 34.7%    | 5    | 65.3%    | 4    | 44.9%    | 3      | 34.7%    | rpmG; ribosomal protein L33             |       |        |       |        |       |        |        |        |
|          | 4  | 53.1%    |      |          | 3    | 34.7%    | 4      | 44.9%    |                                         |       |        |       |        |       |        |        |        |
| SGO_2070 | 7  | 31.4%    | 7    | 37.1%    | 9    | 48.8%    | 7      | 34.8%    | hypothetical protein SGO_2070           |       |        |       |        |       |        |        |        |
|          | 9  | 40.1%    | 3    | 15.7%    | 8    | 42.8%    | 3      | 12.4%    |                                         |       |        |       |        |       |        |        |        |
| SGO_2073 |    |          |      |          |      |          | 3      | 13.0%    | FtsK/SpoIIIE family subfamily, putative |       |        |       |        |       |        |        |        |
| SGO_2080 | 7  | 29.7%    |      |          | 4    | 20.6%    |        |          | transcription activator plcR            |       |        |       |        |       |        |        |        |
|          | 6  | 29.7%    |      |          | 5    | 22.9%    |        |          |                                         |       |        |       |        |       |        |        |        |
| SGO_2081 | 10 | 47.4%    |      |          |      |          |        |          | lipoprotein, putative                   |       |        |       |        |       |        |        |        |
|          | 15 | 60.9%    |      |          | 3    | 24.3%    |        |          |                                         |       |        |       |        |       |        |        |        |

- Show detected proteins only
- Show all proteins

Filter by category:

ABC Transporter

Proteins found:  
1179

Dot Plots Dot Plots

Summary Table

SgFn vs Sg

SgPg vs Sg

SgPgFn vs Sg

SgPg vs SgFn

SgPgFn vs SgFn

SgPgFn vs SgPg

Coverage

Sg

SgFn

SgPg

SgPgFn

Description

Sg

SgFn

SgPg

SgPgFn

Protein

n Coverage

n Coverage

n Coverage

n Coverage

Rep I Rep II

Rep I Rep II

Rep I Rep II

Rep I Rep II

SGO\_2082

9

43.0%

3

17.7%

lipoprotein, putative

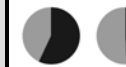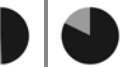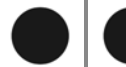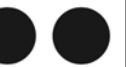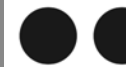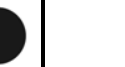

SGO\_2084

4

27.7%

3

13.3%

NAD(P)H dehydrogenase, quinone family

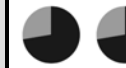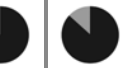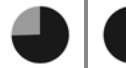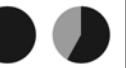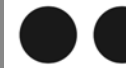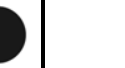

SGO\_2085

21

58.7%

12

37.4%

16

50.6%

13

46.4%

purB; adenylosuccinate lyase

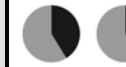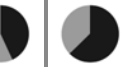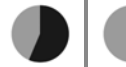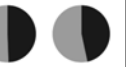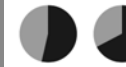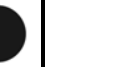

SGO\_2086

6

15.6%

8

18.9%

hypothetical protein SGO\_2086

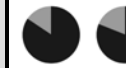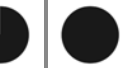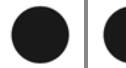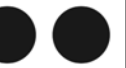

SGO\_2094

8

26.0%

11

37.7%

general stress protein GSP-781

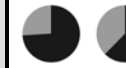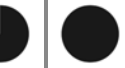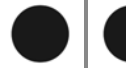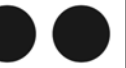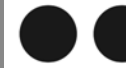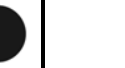

SGO\_2096

16

51.8%

21

60.6%

comB; transport protein ComB

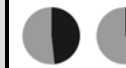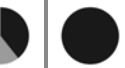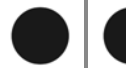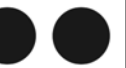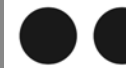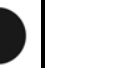

SGO\_2097

30

47.3%

32

49.7%

10

16.0%

3

2.9%

comA; ATP-binding Transport protein ComA

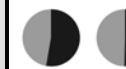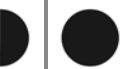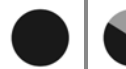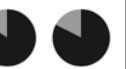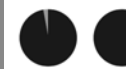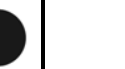

SGO\_2098

17

65.0%

21

65.5%

16

69.0%

20

61.6%

21

75.4%

rpsD; ribosomal protein S4

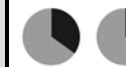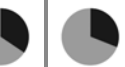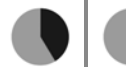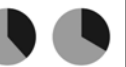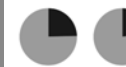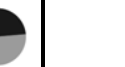

SGO\_2099

4

22.9%

ABC transporter ATP-binding protein

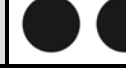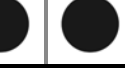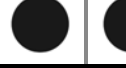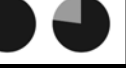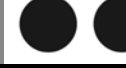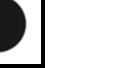

SGO\_2100

14

45.8%

12

42.5%

7

27.1%

25

60.5%

18

49.7%

ABC transporter substrate-binding protein

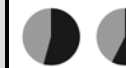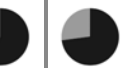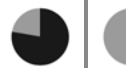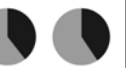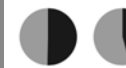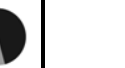

SGO\_2102

5

60.4%

5

60.4%

3

45.8%

hypothetical protein SGO\_2102

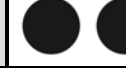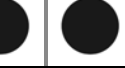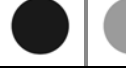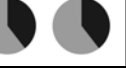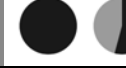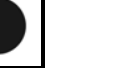

SGO\_2103

4

21.0%

3

21.5%

hydrolase, haloacid dehalogenase-like family

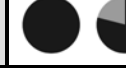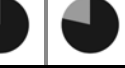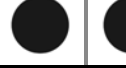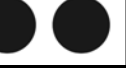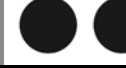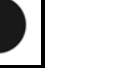 Show detected proteins only Show all proteins Filter by category:

ABC Transporter

Proteins found:

1179

Dot Plots Dot Plots

Summary Table

SgFn vs Sg

SgPg vs Sg

SgPgFn vs Sg

SgPg vs SgFn

SgPgFn vs SgFn

SgPgFn vs SgPg

Coverage

| Protein  | Sg |          | SgFn |          | SgPg |          | SgPgFn |          | Description                                 | Sg    |        | SgFn  |        | SgPg  |        | SgPgFn |        |
|----------|----|----------|------|----------|------|----------|--------|----------|---------------------------------------------|-------|--------|-------|--------|-------|--------|--------|--------|
|          | n  | Coverage | n    | Coverage | n    | Coverage | n      | Coverage |                                             | Rep I | Rep II | Rep I | Rep II | Rep I | Rep II | Rep I  | Rep II |
| SGO_2104 | 15 | 48.4%    | 13   | 53.7%    | 13   | 54.4%    | 9      | 34.7%    | srtB; sortase B                             |       |        |       |        |       |        |        |        |
|          | 18 | 57.9%    | 13   | 51.9%    | 13   | 57.2%    | 9      | 35.4%    |                                             |       |        |       |        |       |        |        |        |
| SGO_2105 | 9  | 55.9%    | 11   | 55.9%    | 5    | 39.0%    | 6      | 48.2%    | abpA; amylase-binding protein AbpA          |       |        |       |        |       |        |        |        |
|          | 12 | 69.7%    | 12   | 69.7%    | 7    | 48.2%    | 6      | 44.6%    |                                             |       |        |       |        |       |        |        |        |
| SGO_2106 | 13 | 44.2%    | 14   | 40.8%    | 14   | 43.0%    | 14     | 45.5%    | ribose-phosphate diphosphokinase            |       |        |       |        |       |        |        |        |
|          | 16 | 48.0%    | 15   | 44.9%    | 14   | 40.8%    | 10     | 34.3%    |                                             |       |        |       |        |       |        |        |        |
| SGO_2107 | 4  | 22.7%    |      |          |      |          |        |          | general stress protein GSP-781              |       |        |       |        |       |        |        |        |
|          | 4  | 23.5%    |      |          |      |          |        |          |                                             |       |        |       |        |       |        |        |        |
| SGO_2108 | 10 | 55.1%    |      |          | 5    | 32.4%    |        |          | mreC; cell shape-determining protein MreC   |       |        |       |        |       |        |        |        |
|          | 11 | 57.8%    |      |          | 3    | 20.6%    |        |          |                                             |       |        |       |        |       |        |        |        |
| SGO_2133 | 32 | 50.5%    | 33   | 53.6%    | 25   | 47.4%    | 19     | 37.6%    | Cell division protein ftsH-like protein     |       |        |       |        |       |        |        |        |
|          | 40 | 57.6%    | 26   | 47.3%    | 22   | 40.9%    | 18     | 37.9%    |                                             |       |        |       |        |       |        |        |        |
| SGO_2134 | 6  | 26.7%    | 12   | 52.8%    | 11   | 46.7%    | 8      | 38.3%    | hpt; hypoxanthine phosphoribosyltransferase |       |        |       |        |       |        |        |        |
|          | 7  | 33.3%    | 12   | 52.8%    | 10   | 46.7%    | 6      | 37.2%    |                                             |       |        |       |        |       |        |        |        |
| SGO_2138 |    |          |      |          |      |          |        |          | Septum formation initiator family           |       |        |       |        |       |        |        |        |
|          | 5  | 42.6%    |      |          |      |          |        |          |                                             |       |        |       |        |       |        |        |        |
| SGO_2139 | 3  | 43.2%    |      |          |      |          |        |          | S4 RNA-binding domain protein               |       |        |       |        |       |        |        |        |
|          |    |          |      |          |      |          |        |          |                                             |       |        |       |        |       |        |        |        |
| SGO_2140 | 6  | 6.6%     |      |          |      |          |        |          | transcription-repair coupling factor        |       |        |       |        |       |        |        |        |
|          | 8  | 9.5%     |      |          |      |          |        |          |                                             |       |        |       |        |       |        |        |        |
| SGO_2141 |    |          |      |          |      |          |        |          | pth; peptidyl-tRNA hydrolase                |       |        |       |        |       |        |        |        |
|          | 3  | 18.5%    |      |          |      |          |        |          |                                             |       |        |       |        |       |        |        |        |
| SGO_2142 | 15 | 56.9%    | 14   | 53.4%    | 16   | 61.2%    | 13     | 44.7%    | GTP-binding protein                         |       |        |       |        |       |        |        |        |
|          | 17 | 62.0%    | 16   | 58.5%    | 18   | 61.2%    | 15     | 56.9%    |                                             |       |        |       |        |       |        |        |        |

Description

| Protein  | Sg |          | SgFn |          | SgPg |          | SgPgFn |          | Description                                 | Sg    |        | SgFn  |        | SgPg  |        | SgPgFn |        |
|----------|----|----------|------|----------|------|----------|--------|----------|---------------------------------------------|-------|--------|-------|--------|-------|--------|--------|--------|
|          | n  | Coverage | n    | Coverage | n    | Coverage | n      | Coverage |                                             | Rep I | Rep II | Rep I | Rep II | Rep I | Rep II | Rep I  | Rep II |
| SGO_2104 | 15 | 48.4%    | 13   | 53.7%    | 13   | 54.4%    | 9      | 34.7%    | srtB; sortase B                             |       |        |       |        |       |        |        |        |
|          | 18 | 57.9%    | 13   | 51.9%    | 13   | 57.2%    | 9      | 35.4%    |                                             |       |        |       |        |       |        |        |        |
| SGO_2105 | 9  | 55.9%    | 11   | 55.9%    | 5    | 39.0%    | 6      | 48.2%    | abpA; amylase-binding protein AbpA          |       |        |       |        |       |        |        |        |
|          | 12 | 69.7%    | 12   | 69.7%    | 7    | 48.2%    | 6      | 44.6%    |                                             |       |        |       |        |       |        |        |        |
| SGO_2106 | 13 | 44.2%    | 14   | 40.8%    | 14   | 43.0%    | 14     | 45.5%    | ribose-phosphate diphosphokinase            |       |        |       |        |       |        |        |        |
|          | 16 | 48.0%    | 15   | 44.9%    | 14   | 40.8%    | 10     | 34.3%    |                                             |       |        |       |        |       |        |        |        |
| SGO_2107 | 4  | 22.7%    |      |          |      |          |        |          | general stress protein GSP-781              |       |        |       |        |       |        |        |        |
|          | 4  | 23.5%    |      |          |      |          |        |          |                                             |       |        |       |        |       |        |        |        |
| SGO_2108 | 10 | 55.1%    |      |          | 5    | 32.4%    |        |          | mreC; cell shape-determining protein MreC   |       |        |       |        |       |        |        |        |
|          | 11 | 57.8%    |      |          | 3    | 20.6%    |        |          |                                             |       |        |       |        |       |        |        |        |
| SGO_2133 | 32 | 50.5%    | 33   | 53.6%    | 25   | 47.4%    | 19     | 37.6%    | Cell division protein ftsH-like protein     |       |        |       |        |       |        |        |        |
|          | 40 | 57.6%    | 26   | 47.3%    | 22   | 40.9%    | 18     | 37.9%    |                                             |       |        |       |        |       |        |        |        |
| SGO_2134 | 6  | 26.7%    | 12   | 52.8%    | 11   | 46.7%    | 8      | 38.3%    | hpt; hypoxanthine phosphoribosyltransferase |       |        |       |        |       |        |        |        |
|          | 7  | 33.3%    | 12   | 52.8%    | 10   | 46.7%    | 6      | 37.2%    |                                             |       |        |       |        |       |        |        |        |
| SGO_2138 |    |          |      |          |      |          |        |          | Septum formation initiator family           |       |        |       |        |       |        |        |        |
|          | 5  | 42.6%    |      |          |      |          |        |          |                                             |       |        |       |        |       |        |        |        |
| SGO_2139 | 3  | 43.2%    |      |          |      |          |        |          | S4 RNA-binding domain protein               |       |        |       |        |       |        |        |        |
|          |    |          |      |          |      |          |        |          |                                             |       |        |       |        |       |        |        |        |
| SGO_2140 | 6  | 6.6%     |      |          |      |          |        |          | transcription-repair coupling factor        |       |        |       |        |       |        |        |        |
|          | 8  | 9.5%     |      |          |      |          |        |          |                                             |       |        |       |        |       |        |        |        |
| SGO_2141 |    |          |      |          |      |          |        |          | pth; peptidyl-tRNA hydrolase                |       |        |       |        |       |        |        |        |
|          | 3  | 18.5%    |      |          |      |          |        |          |                                             |       |        |       |        |       |        |        |        |
| SGO_2142 | 15 | 56.9%    | 14   | 53.4%    | 16   | 61.2%    | 13     | 44.7%    | GTP-binding protein                         |       |        |       |        |       |        |        |        |
|          | 17 | 62.0%    | 16   | 58.5%    | 18   | 61.2%    | 15     | 56.9%    |                                             |       |        |       |        |       |        |        |        |

- Show detected proteins only  
 Show all proteins

Proteins found:  
1179

Filter by category:

ABC Transporter

Dot Plots Dot Plots

Summary Table

SgFn vs Sg

SgPg vs Sg

SgPgFn vs Sg

SgPg vs SgFn

SgPgFn vs SgFn

SgPgFn vs SgPg

Coverage

| Protein  | <i>Sg</i> |          | <i>SgFn</i> |          | <i>SgPg</i> |          | <i>SgPgFn</i> |          | Description                              | <i>Sg</i> |        | <i>SgFn</i> |        | <i>SgPg</i> |        | <i>SgPgFn</i> |        |
|----------|-----------|----------|-------------|----------|-------------|----------|---------------|----------|------------------------------------------|-----------|--------|-------------|--------|-------------|--------|---------------|--------|
|          | n         | Coverage | n           | Coverage | n           | Coverage | n             | Coverage |                                          | Rep I     | Rep II | Rep I       | Rep II | Rep I       | Rep II | Rep I         | Rep II |
| SGO_2145 | 17        | 56.5%    |             |          | 15          | 56.1%    | 15            | 56.9%    | comE; competence response regulator ComE |           |        |             |        |             |        |               |        |
|          | 20        | 61.6%    |             |          | 17          | 56.1%    | 16            | 56.9%    |                                          |           |        |             |        |             |        |               |        |
| SGO_2146 | 11        | 29.4%    |             |          | 7           | 23.2%    |               |          | comD; histidine protein kinase ComD      |           |        |             |        |             |        |               |        |
|          | 11        | 32.0%    |             |          | 6           | 19.9%    | 3             | 6.0%     |                                          |           |        |             |        |             |        |               |        |
| SGO_2150 | 11        | 44.8%    | 9           | 34.5%    | 8           | 39.3%    | 7             | 34.8%    | degP; serine protease                    |           |        |             |        |             |        |               |        |
|          | 14        | 52.1%    | 9           | 32.7%    | 9           | 39.5%    | 5             | 24.4%    |                                          |           |        |             |        |             |        |               |        |

- Show detected proteins only
- Show all proteins

Proteins found:  
1179

Filter by category:

ABC Transporter

[Dot Plots](#) [Dot Plots](#)
