# Supplementary material for: Proteomics of Streptococcus gordonii within a model developing oral microbial community
Source: PubMed Central journal article supplement (PMC3534352; doi:10.1186/1471-2180-12-211), 2012-09-18
Supplement: 1471-2180-12-211-S9.pdf [file 1471-2180-12-211-S9.pdf]

q-Value < 0.005

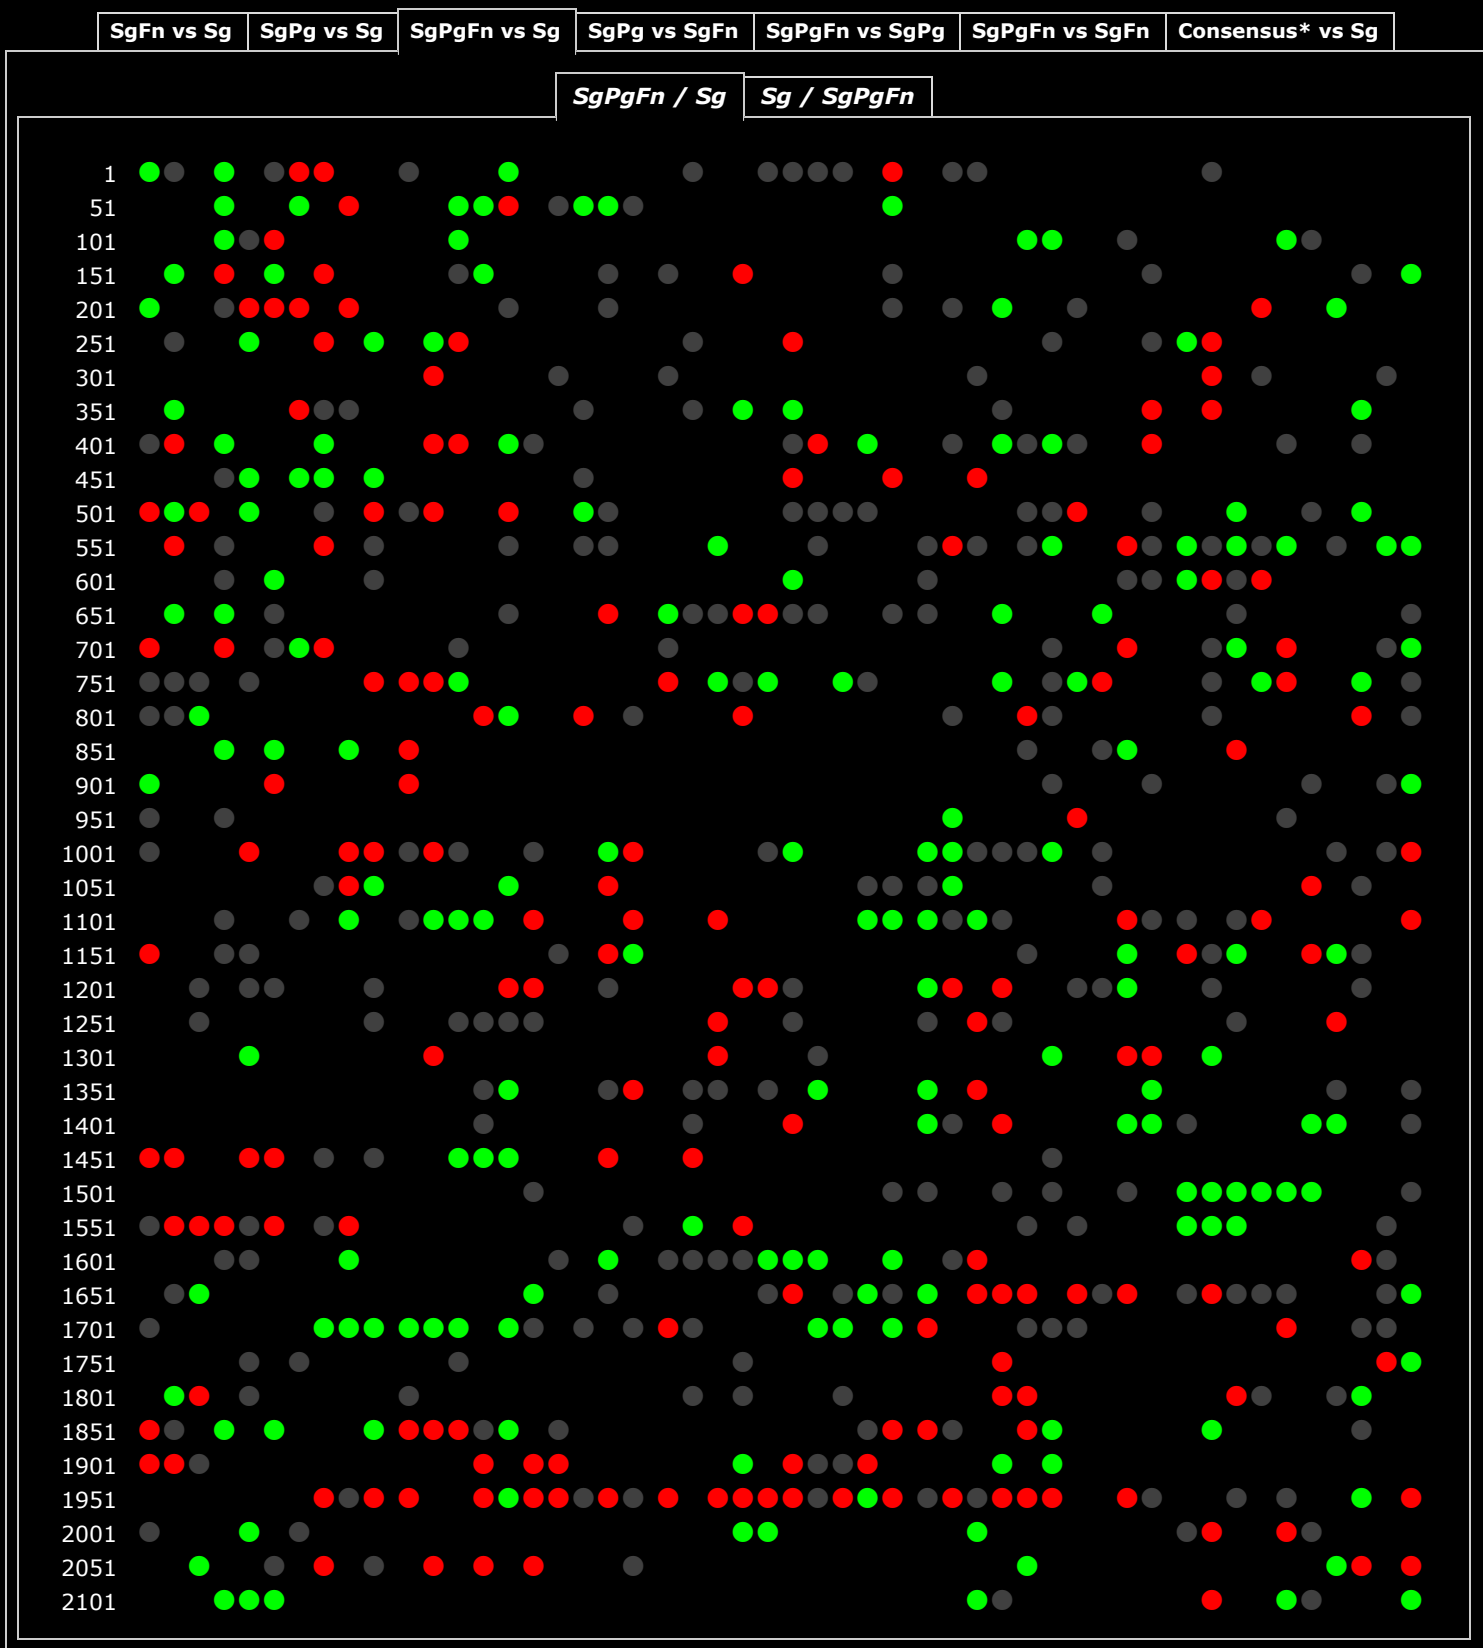

\*a consensus view of those proteins that trend the same in SgPg/Sg and SgPgFn/Sg

Hendrickson et al.
